# Supplementary material for: Reduced sphingolipid biosynthesis modulates proteostasis networks to enhance longevity
Source: Aging (Albany NY). 2023 Jan 14;15(2):472–91. doi: 10.18632/aging.204485 (PMC9925692; doi:10.18632/aging.204485)
Supplement: Supplementary Table 1 [file aging-15-204485-s001.xlsx]

## Sheet: Filter
					two way ANOVA			pLSD						L2FC						Correlation R value for individual time templates vs. abundance level (see Fig. 1C and 2B for depictions of representative templates)
																				in control samples										in treatment (Myr) samples										in all samples
ENTREZID	GENENAME	ORF	SGD	DESCRIPTION	Time p	Treat p	Interaction p	1	2	3	4	5	6	1	2	3	4	5	6	1	2	3	4	5	6	7	8	9	10	1	2	3	4	5	6	7	8	9	10	1	2	3	4	5	6	7	8	9	L
853755	AAT1	YKL106W	S000001589	Mitochondrial aspartate aminotransferase; catalyzes the conversion of oxaloacetate to aspartate in aspartate and asparagine biosynthesis	0.279825	0.00964483	0.589393	0.176187	0.596078	0.267421	0.27362	0.287378	0.0135449	0.0703586	0.25548	0.104574	0.106297	0.114079	0.00518658	-0.0578009	0.674386	0.541353	0.43763	0.566534	-0.91084	0.126737	0.172739	-0.0129712	0.576453	0.467874	0.899926	0.547338	0.107243	0.0483316	-0.670452	0.403995	0.598678	0.0873217	0.550894	0.0697706	0.779544	0.581894	0.386392	0.477524	-0.916283	0.205361	0.291941	0.0112279	0.61162
852538	ABD1	YBR236C	S000000440	Methyltransferase; catalyzes the transfer of a methyl group from S-adenosylmethionine to the GpppN terminus of capped mRNA; nuclear protein that relocalizes to the cytosol in response to hypoxia	0.0106525	4.7856e-05	0.0109751	-0.218301	0.0655537	0.756239	0.544044	0.937302	0.808435	-0.0905918	0.029832	0.331863	0.229061	0.377816	0.305427	-0.737649	-0.43563	0.0560009	0.167633	0.412402	-0.186616	-0.626167	-0.136908	-0.200361	-0.128554	0.424019	0.832518	0.812912	0.86684	0.652974	-0.629042	-0.0375753	-0.00583869	0.443501	0.942083	-0.0174838	0.486544	0.722683	0.826133	0.769481	-0.632919	-0.354146	-0.0754032	0.275503	0.738012
854414	ABP140	YOR239W	S000005765	AdoMet-dependent tRNA methyltransferase and actin binding protein; C-terminal domain is responsible for 3-methylcytidine modification of residue 32 of the tRNA anticodon loop of tRNA-Thr and tRNA-Ser and contains an S-adenosylmethionine (AdoMet) binding motif; N-terminal actin binding sequence interacts with actin filaments and localizes to actin patches and cables; N- and C-terminal domains are …	0.0292378	1.83534e-05	0.0242876	0.0960959	0.951499	0.775242	0.348274	0.842422	-0.0209337	0.0603466	0.490025	0.417335	0.17942	0.44089	-0.0108718	0.458673	0.537281	0.742698	0.455343	0.786866	-0.220939	-0.316822	0.420466	-0.210898	0.763229	0.846403	0.271523	0.109644	0.0813641	-0.252549	0.50295	0.19635	0.0441844	0.355467	0.259096	0.976112	0.519173	0.4873	0.311022	0.196584	0.319404	0.00292671	0.260366	0.196831	0.627726
851324	ACK1	YDL203C	S000002362	Protein that functions in the cell wall integrity pathway; functions upstream of Pkc1p; GFP-fusion protein expression is induced in response to the DNA-damaging agent MMS; non-tagged Ack1p is detected in purified mitochondria	0.0506274	1.14856e-05	0.317159	0.221514	0.66743	0.777295	0.321616	0.838602	0.309585	0.101177	0.382644	0.418035	0.171891	0.451225	0.161519	-0.86027	-0.306013	-0.070245	-0.126566	0.177946	-0.473192	-0.292835	0.0658508	-0.33804	-0.288864	-0.73702	-0.213131	-0.35049	0.0013832	-0.295174	-0.467427	0.200639	-0.471981	0.296924	-0.386304	-0.926687	-0.310448	-0.189276	-0.0933624	0.0165125	-0.533998	-0.138748	-0.135845	-0.134608	-0.365493
852617	ADE5,7	YGL234W	S000003203	Enzyme of the 'de novo' purine nucleotide biosynthetic pathway; contains aminoimidazole ribotide synthetase and glycinamide ribotide synthetase activities	0.0100449	1.30844e-05	0.0672269	0.704237	0.979872	0.730221	0.310778	-0.0492016	0.438404	0.359805	0.550229	0.403546	0.185059	-0.0330778	0.257286	-0.875146	-0.245959	-0.245577	-0.299949	-0.0462081	-0.56403	0.0183601	0.0499336	-0.333201	-0.423638	-0.509241	-0.707615	-0.865258	-0.727789	-0.11411	0.38583	0.265795	-0.240277	-0.806479	-0.785557	-0.675798	-0.672476	-0.807128	-0.704558	-0.110242	0.174824	0.232254	-0.191673	-0.780961	-0.787928
852952	ADE6	YGR061C	S000003293	Formylglycinamidine-ribonucleotide (FGAM)-synthetase; catalyzes a step in the 'de novo' purine nucleotide biosynthetic pathway	0.248573	0.00229754	0.0729386	0.537968	0.721253	0.615531	0.218273	-0.214483	0.0505564	0.334361	0.507454	0.381395	0.132508	-0.146293	0.0302277	0.107518	0.742878	0.824281	0.623025	0.562547	-0.832157	-0.166214	0.317818	0.225524	0.76457	-0.354923	-0.273679	-0.601608	-0.725158	0.0043263	-0.00874263	0.460963	0.110118	-0.921587	-0.528345	-0.190687	0.397647	0.206657	-0.0567113	0.467685	-0.693675	0.225728	0.348994	-0.53942	0.215056
852017	ADE8	YDR408C	S000002816	Phosphoribosyl-glycinamide transformylase; catalyzes a step in the 'de novo' purine nucleotide biosynthetic pathway	0.151567	0.00487039	0.403279	0.220637	0.567949	0.555099	0.139094	-0.0258	0.263361	0.0907417	0.2353	0.216487	0.0564763	-0.0110835	0.100848	0.0771714	0.649626	0.592796	0.456074	0.749361	-0.744547	0.0264	0.218426	-0.172468	0.659119	0.188386	0.037319	-0.403357	-0.285322	0.411487	0.141181	0.588365	-0.180253	-0.772394	-0.0556432	0.180149	0.333899	-0.0293603	-0.00349281	0.666537	-0.242204	0.461744	-0.0349729	-0.670955	0.267367
852136	AGE1	YDR524C	S000002932	ADP-ribosylation factor (ARF) GTPase activating protein (GAP) effector; involved in the secretory and endocytic pathways; contains C2C2H2 cysteine/histidine motif	0.0268192	0.000216385	0.228792	-0.118325	0.503679	0.596661	0.354798	0.606426	0.523643	-0.0661753	0.358895	0.402345	0.246505	0.427938	0.34018	-0.971739	-0.532134	-0.358406	-0.285849	-0.0226992	-0.298637	-0.19225	-0.119278	-0.338875	-0.54772	-0.560797	-0.0586726	-0.24213	0.227082	0.435184	-0.486581	0.250636	-0.61209	-0.147946	-0.0518139	-0.936751	-0.446334	-0.354968	-0.170391	0.0983694	-0.372178	-0.0883334	-0.26071	-0.313899	-0.457106
851486	AHK1	YDL073W	S000002231	Scaffold protein in the HKR1 sub-branch of the Hog1p-signaling pathway; physically interacts with the cytoplasmic domain of Hkr1p, and with Sho1p, Pbs2p, and Ste11p; prevents cross-talk signaling from Hkr1p of the osmotic stress MAPK cascade to the Kss1p MAPK cascade; non-essential gene	0.0798583	0.000281204	0.266299	0.00705313	0.63875	0.534446	0.301374	0.655338	0.240424	0.00440385	0.36868	0.316656	0.177065	0.360957	0.123762	0.059189	0.332458	0.615026	0.697289	0.945987	-0.361341	-0.404614	-0.0568652	-0.063978	0.683645	0.8379	0.490167	0.482724	0.699095	0.405425	0.217883	-0.0276252	-0.236651	0.478868	0.74091	0.620228	0.522646	0.669043	0.865146	0.792348	-0.0408722	-0.236515	-0.196717	0.301985	0.887192
851379	AIR2	YDL175C	S000002334	RNA-binding subunit of the TRAMP nuclear RNA surveillance complex; involved in nuclear RNA processing and degradation; involved in TRAMP complex assembly as a bridge between Mtr4p and Trf4p; stimulates the poly(A) polymerase activity of Pap2p in vitro; has 5 zinc knuckle motifs; AIR2 has a paralog, AIR1, that arose from the whole genome duplication; Air2p and Air1p have nonredundant roles in regu…	0.011885	0.000229782	0.0657847	-0.133781	0.156605	0.385358	0.518466	0.848522	0.83942	-0.0556963	0.0803455	0.193316	0.266595	0.429305	0.390968	-0.960802	-0.718208	-0.593727	-0.407767	-0.100188	-0.0523334	-0.111901	-0.28078	-0.4156	-0.716151	-0.381984	0.214248	0.412495	0.660694	0.661815	-0.652989	-0.282415	-0.282299	0.173904	0.423337	-0.899597	-0.438866	-0.252789	0.00277443	0.23413	-0.34447	-0.215975	-0.342661	-0.230621	-0.339599
850778	ALT1	YLR089C	S000004079	Alanine transaminase (glutamic pyruvic transaminase); involved in alanine biosynthesis and catabolism; TOR1-independent role in determining chronological lifespan; expression is induced in the presence of alanine; repression is mediated by Nrg1p; ALT1 has a paralog, ALT2, that arose from the whole genome duplication; Alt2p is catalytically inactive	0.94601	1.06615e-05	0.258505	0.227949	0.657692	0.785318	0.259511	0.875051	0.375859	0.138407	0.398603	0.489582	0.156762	0.561298	0.22323	-0.429645	-0.261714	0.0724402	-0.256496	0.381787	-0.0986	-0.428233	0.421634	-0.706232	-0.132275	0.651073	0.185892	-0.150436	0.251524	-0.05442	0.415936	0.436968	-0.519987	0.372576	0.206895	-0.0827867	-0.256333	-0.0257777	-0.183464	0.585759	0.241451	-0.289654	0.197481	-0.817824	-0.0191847
851829	AMD2	YDR242W	S000002650	Putative amidase	0.111082	2.49952e-06	0.286208	0.244361	0.496097	0.968721	0.4208	1.15295	0.792363	0.102936	0.215033	0.42857	0.202946	0.532269	0.376738	-0.777505	-0.921655	-0.777225	-0.706311	-0.382835	0.388306	-0.123055	-0.149336	-0.510586	-0.930116	0.000318729	-0.0636243	-0.451003	0.164145	-0.239844	0.0807978	0.524605	-0.812714	0.447473	-0.156562	-0.633565	-0.790282	-0.910144	-0.475054	-0.459159	0.366071	0.22145	-0.620185	-0.141742	-0.85418
850818	APC2	YLR127C	S000004117	Subunit of the Anaphase-Promoting Complex/Cyclosome (APC/C); which is a ubiquitin-protein ligase required for degradation of anaphase inhibitors, including mitotic cyclins, during the metaphase/anaphase transition; component of the catalytic core of the APC/C; has similarity to cullin Cdc53p	0.0395076	0.00194291	0.0395076	-0.266566	0.679261	0.587286	0.243531	0.489516	0.00699674	-0.147901	0.426802	0.377244	0.151832	0.294024	0.00386527	-0.696132	-0.192494	0.164949	0.269356	0.503659	-0.452645	-0.464789	-0.11941	-0.162947	0.0275071	0.494795	0.0234993	0.0661672	0.591009	0.269028	0.46507	-0.0590481	-0.658801	0.478546	0.355672	-0.585413	-0.196314	0.194449	0.464295	0.614095	-0.337093	-0.509201	-0.326411	-0.0268024	0.137158
856322	AQY1	YPR192W	S000006396	Spore-specific water channel; mediates the transport of water across cell membranes, developmentally controlled; may play a role in spore maturation, probably by allowing water outflow, may be involved in freeze tolerance	0.569658	0.00854555	0.284622	0.149387	0.411954	0.465641	-0.0490924	0.502965	0.0852686	0.0998563	0.304919	0.341179	-0.034344	0.359606	0.0686951	-0.627619	-0.235731	0.0340993	-0.465483	-0.334968	-0.32944	-0.343928	0.634543	-0.253826	-0.393624	-0.31796	-0.335458	-0.502822	-0.325979	-0.866148	0.106365	0.250281	-0.262272	0.453814	-0.588179	-0.649	-0.388859	-0.314056	-0.541895	-0.814142	-0.157129	-0.0705207	0.264098	0.128693	-0.668142
854660	ATG32	YIL146C	S000001408	Mitochondrial outer membrane protein required to initiate mitophagy; recruits the autophagy adaptor protein Atg11p and the ubiquitin-like protein Atg8p to the mitochondrial surface to initiate mitophagy, the selective vacuolar degradation of mitochondria in response to starvation; can promote pexophagy when placed ectopically in the peroxisomal membrane; regulates mitophagy and ethanol production…	0.11965	1.02156e-06	0.0120997	0.211383	0.46095	0.727025	0.22322	1.24754	1.28678	0.118527	0.271518	0.459639	0.145593	0.717827	0.692177	-0.835457	-0.852396	-0.459853	-0.440618	-0.0896393	0.242748	-0.461248	-0.0596146	-0.467704	-0.69341	0.176548	0.272271	0.402774	0.922078	0.706114	-0.16785	-0.195979	-0.62597	0.460234	0.640204	-0.260083	-0.172086	0.166179	0.701934	0.667666	-0.042409	-0.440626	-0.664931	0.220218	0.283846
850702	BRE2	YLR015W	S000004005	Subunit of COMPASS (Set1C) complex; COMPASS methylates Lys4 of histone H3 and functions in silencing at telomeres; has a C-terminal Sdc1 Dpy-30 Interaction (SDI) domain that mediates binding to Sdc1p; similar to trithorax-group protein ASH2L	0.0430242	0.00185153	0.507452	-0.0376488	0.277346	0.398642	0.319012	0.620586	0.383412	-0.0172771	0.151965	0.210281	0.158266	0.30964	0.181898	-0.842882	-0.300418	-0.00217366	-0.031126	0.236238	-0.46288	-0.377086	0.0364554	-0.27561	-0.224532	-0.181542	0.48419	0.706302	0.725603	0.492065	-0.794	-0.335145	0.02978	0.425758	0.60848	-0.646142	0.0273499	0.330085	0.319878	0.388185	-0.680738	-0.408261	0.0382391	0.0164319	0.136192
851367	BRE4	YDL231C	S000002390	Zinc finger protein containing five transmembrane domains; null mutant exhibits strongly fragmented vacuoles and sensitivity to brefeldin A, a drug which is known to affect intracellular transport	0.0217927	0.000602719	0.0802299	-0.212938	0.542528	0.50931	0.227188	0.706325	0.439762	-0.0979038	0.315222	0.280072	0.121817	0.374919	0.234762	-0.943377	-0.395915	-0.200268	-0.244565	-0.081238	-0.44258	-0.232109	0.0406646	-0.228115	-0.459011	-0.44976	0.116723	0.199774	0.555708	0.0431205	-0.597404	-0.120381	-0.434897	0.659801	0.15536	-0.917624	-0.296647	-0.109302	-0.0432019	-0.0553178	-0.542392	-0.228588	-0.0919971	0.000671306	-0.338121
852877	BRP1	YGL007W	S000002975	Putative protein of unknown function; conserved among S. cerevisiae strains; located in the upstream region of PMA1; deletion leads to polyamine resistance due to downregulation of PMA1	0.262955	0.00643362	0.469976	0.32239	0.10902	0.358109	0.225913	0.16493	0.636428	0.586307	0.203363	0.501676	0.411925	0.267509	0.878333	0.62537	0.618753	0.0635759	0.366966	0.079514	-0.157297	0.697371	-0.378884	0.384666	0.444516	0.191058	0.548278	0.226603	0.49232	0.792945	-0.502464	0.389502	-0.318721	-0.170204	0.568302	0.347174	0.635638	0.203774	0.512908	0.669216	-0.456851	0.530633	-0.375391	-0.0204327	0.598482
856170	BRR1	YPR057W	S000006261	snRNP protein component of spliceosomal snRNPs; required for pre-mRNA splicing and snRNP biogenesis; in null mutant newly-synthesized snRNAs are destabilized and 3'-end processing is slowed	0.276692	0.00215251	0.487084	0.0351103	0.263045	0.259406	0.32425	0.723247	0.397494	0.0168659	0.119887	0.126707	0.153421	0.338582	0.172025	-0.168749	-0.398122	-0.104634	0.00784243	0.677584	0.33484	-0.363207	-0.150302	-0.667664	-0.0273243	0.598015	0.415598	0.721905	0.870028	0.645288	0.0723203	-0.442844	-0.13197	0.45522	0.83753	0.353204	0.0941595	0.479753	0.650352	0.844266	0.234101	-0.524553	-0.178981	-0.0216285	0.607272
856301	BSP1	YPR171W	S000006375	Adapter that links synaptojanins to the cortical actin cytoskeleton; the synaptojanins are Inp52p and Inp53p	0.025198	0.00334773	0.866103	0.418228	0.400004	0.386171	0.129645	0.415299	0.116425	0.244486	0.258531	0.249194	0.0802971	0.22568	0.0618413	0.0474259	0.442423	0.783519	0.867908	0.759828	-0.512199	-0.491576	-0.0466252	0.337999	0.767234	-0.203617	0.146385	0.434609	0.851324	0.42563	-0.38878	-0.397925	-0.49376	0.651219	0.451081	-0.0715218	0.323694	0.658191	0.908242	0.640305	-0.480966	-0.473611	-0.26579	0.508541	0.656864
856036	BTS1	YPL069C	S000005990	Geranylgeranyl diphosphate synthase (GGPS); increases the intracellular pool of geranylgeranyl diphosphate, suppressor of bet2 mutation that causes defective geranylgeranylation of small GTP-binding proteins that mediate vesicular traffic	0.0358052	0.000232279	0.0914758	-0.0984929	0.296954	0.7777	0.366748	0.826524	0.513747	-0.0570711	0.189577	0.460681	0.200231	0.427078	0.269045	-0.455939	0.0803567	0.575519	0.393384	0.376236	-0.557583	-0.670496	0.274544	0.121359	0.281867	0.542825	0.893736	0.78613	0.791938	0.343227	-0.587672	0.0757918	0.0529733	0.658505	0.888798	0.193028	0.728875	0.89083	0.805217	0.45075	-0.728934	-0.273212	0.176646	0.567778	0.824742
855428	CAF40	YNL288W	S000005232	Component of the CCR4-NOT transcriptional complex; evolutionarily conserved; involved in controlling mRNA initiation, elongation, and degradation; binds Cdc39p	0.0302863	0.00013881	0.309873	0.107619	0.57763	0.590721	0.315439	0.783375	0.198772	0.052334	0.327342	0.350611	0.172066	0.402951	0.100566	-0.699237	-0.241174	0.218705	0.245792	0.428281	-0.394173	-0.598488	-0.0174813	-0.117376	0.00617722	-0.259202	-0.0167108	0.388913	0.690067	0.0641743	-0.238065	-0.542919	-0.351092	0.808699	0.257167	-0.620712	-0.182528	0.327806	0.47825	0.339116	-0.38983	-0.67068	-0.165145	0.265828	0.116149
852924	CAX4	YGR036C	S000003268	Dolichyl pyrophosphate (Dol-P-P) phosphatase; has a luminally oriented active site in the ER; cleaves the anhydride linkage in Dol-P-P; required for Dol-P-P-linked oligosaccharide intermediate synthesis and protein N-glycosylation	0.103104	2.65668e-05	0.130979	0.00121599	0.699506	0.422877	0.78677	0.706992	0.286962	0.00071036	0.501329	0.2738	0.51555	0.44395	0.167471	-0.687642	-0.0676476	-0.0310788	0.250654	0.46165	-0.602074	-0.0438716	-0.358751	-0.144596	-0.00789996	0.270786	0.719943	0.955924	0.732281	0.355729	-0.639878	-0.371843	0.356236	0.570541	0.817435	-0.51895	0.188646	0.302809	0.476463	0.534237	-0.75757	-0.16764	-0.196422	0.0684456	0.275577
853438	CCT3	YJL014W	S000003551	Subunit of the cytosolic chaperonin Cct ring complex; related to Tcp1p, required for the assembly of actin and tubulins in vivo; capable of binding Q/N rich proteins and mediating their folding	0.0307317	0.00249149	0.367945	-0.0942992	0.416773	0.490636	0.197649	0.597974	0.296902	-0.0552094	0.291822	0.342174	0.124603	0.350846	0.171136	-0.651986	-0.0902619	0.351138	0.319078	0.370802	-0.537813	-0.585274	0.0674955	0.0328037	0.104602	0.135626	0.493761	0.740929	0.949603	0.456135	-0.488938	-0.369497	-0.207102	0.745028	0.744461	-0.370515	0.181093	0.597786	0.678398	0.471626	-0.599582	-0.572947	-0.0560995	0.386488	0.43432
852428	CCZ1	YBR131W	S000000335	Subunit of a heterodimeric guanine nucleotide exchange factor (GEF); subunit of the Mon1-Ccz1 GEF complex, which stimulates nucleotide exchange and activation of Ypt7p, a Rab family GTPase involved in membrane tethering and fusion events at the late endosome and vacuole; GEF activity is stimulated by membrane association and anionic phospholipids; involved in localizing Ypt7p to the vacuolar memb…	0.0186122	4.18971e-06	0.341559	0.208193	0.639629	0.500755	0.338465	0.828462	0.788181	0.146379	0.422492	0.318123	0.212239	0.47581	0.426606	0.394009	0.806721	0.854927	0.727592	0.744285	-0.626422	-0.126574	0.226665	0.176055	0.922204	0.667114	0.640482	0.69865	0.906186	0.667308	-0.143039	-0.127184	-0.208908	0.478937	0.922659	0.617688	0.730118	0.788407	0.900604	0.729908	-0.305846	-0.134226	-0.081425	0.409276	0.975014
856507	CDC12	YHR107C	S000001149	Component of the septin ring that is required for cytokinesis; septins are GTP-binding proteins that assemble into rod-like hetero-oligomers that can associate with other rods to form filaments; septin rings at the mother-bud neck act as scaffolds for recruiting cell division factors and as barriers to prevent diffusion of specific proteins between mother and daughter cells	0.024974	8.31051e-05	0.176389	-0.0223389	0.795133	0.530792	0.330973	0.736266	0.308783	-0.0128825	0.417506	0.329926	0.189796	0.405198	0.15395	-0.273166	-0.187846	0.335206	0.40946	0.765379	-0.0355586	-0.687334	-0.0682042	-0.247449	0.266719	0.605358	0.0137191	0.324205	0.550241	0.386978	0.588005	-0.417613	-0.261039	0.309027	0.467131	0.259559	-0.0963926	0.410103	0.606254	0.695162	0.381487	-0.67214	-0.216645	0.0716947	0.469138
851306	CDC13	YDL220C	S000002379	Single stranded DNA-binding protein found at TG1-3 telomere G-tails; key roles in regulation of telomerase, telomere end protection, conventional telomere replication; regulates telomere replication through recruitment of specific sub-complexes, essential function is telomere capping; forms homodimer via N-terminus; disruption of dimerization leads to short telomeres; autophagy and proteasome are…	0.298332	0.000165362	0.257364	0.294312	0.717807	0.427015	0.0454602	0.784892	0.454611	0.254848	0.581388	0.352282	0.0333313	0.581928	0.302646	0.310192	0.624185	0.78586	0.345582	0.623162	-0.479346	-0.264804	0.617211	-0.186031	0.701432	0.631805	0.423426	0.630038	0.880606	0.596556	0.0962079	-0.309687	-0.268605	0.517333	0.812454	0.592179	0.65061	0.880978	0.772494	0.760449	-0.230784	-0.358993	0.204819	0.216687	0.945905
851274	CDC15	YAR019C	S000000072	Protein kinase of the Mitotic Exit Network; localized to the spindle pole bodies at late anaphase; promotes mitotic exit by directly switching on the kinase activity of Dbf2p; required for spindle disassembly after meiosis II; relocalizes to the cytoplasm upon DNA replication stress	0.032183	2.06638e-05	0.343725	0.164737	0.674578	0.886036	0.185389	0.719024	0.522796	0.102024	0.445637	0.568744	0.114811	0.401379	0.278462	-0.202242	0.286612	0.736342	0.63691	0.616462	-0.56478	-0.625369	0.182273	0.189172	0.560885	0.497539	0.596146	0.49433	0.901507	0.587232	-0.256533	0.090858	-0.477112	0.553094	0.794833	0.191362	0.549993	0.75842	0.955092	0.744363	-0.504329	-0.321835	-0.190579	0.463744	0.841677
850930	CDC42	YLR229C	S000004219	Small rho-like GTPase; essential for establishment and maintenance of cell polarity; plays a role late in cell fusion via activation of key cell fusion regulator Fus2p; mutants have defects in the organization of actin and septins; human homolog CDC42 can complement yeast cdc42 mutant	0.0214465	1.55588e-05	0.38593	0.250458	0.498804	0.521243	0.305956	0.938002	0.554579	0.12291	0.225096	0.284357	0.15639	0.47302	0.252556	-0.252205	-0.619264	-0.131722	-0.108205	0.419115	0.531109	-0.60659	-0.0398539	-0.555985	-0.202942	0.272621	-0.178164	0.263051	0.634462	0.498972	0.497983	-0.578282	-0.449617	0.303566	0.371339	0.0140006	-0.457908	0.0773986	0.306584	0.529691	0.593214	-0.683054	-0.28396	-0.141889	0.0995336
851545	CDC7	YDL017W	S000002175	DDK (Dbf4-dependent kinase) catalytic subunit; required for origin firing and replication fork progression in mitotic S phase through phosphorylation of Mcm2-7p complexes and Cdc45p; kinase activity correlates with cyclical DBF4 expression; required for pre-meiotic DNA replication, meiotic DSB formation, recruitment of monopolin complex to kinetochores during meiosis I, regulation of meiosis-spec…	0.0169768	0.00280618	0.287384	0.00912208	0.428799	0.605104	0.120868	0.762311	0.233744	0.00517802	0.245239	0.448713	0.0852715	0.531834	0.164047	-0.732498	-0.906509	-0.465199	-0.449091	-0.119103	0.414155	-0.522524	-0.0560697	-0.448957	-0.696212	-0.324403	-0.824947	-0.597545	-0.192598	-0.420224	0.719081	-0.241793	-0.558072	0.176604	-0.618303	-0.635939	-0.986169	-0.588004	-0.386932	-0.276222	0.611477	-0.458526	-0.299455	-0.213212	-0.750211
855204	CEP3	YMR168C	S000004778	Essential kinetochore protein; component of the CBF3 complex that binds the CDEIII region of the centromere; contains an N-terminal Zn2Cys6 type zinc finger domain, a C-terminal acidic domain, and a putative coiled coil dimerization domain	0.0416	0.000904679	0.0912087	-0.0852598	0.369688	0.743612	0.205898	0.800643	0.204007	-0.0565513	0.253363	0.486938	0.130102	0.457992	0.113086	-0.171344	0.218553	0.655689	0.620599	0.772719	-0.447794	-0.603248	0.0946956	0.0122835	0.554825	0.625408	0.775874	0.625708	0.824109	0.324402	-0.356003	0.141935	-0.202949	0.718022	0.832091	0.358167	0.690217	0.830064	0.954675	0.677174	-0.514896	-0.240585	-0.0939315	0.530405	0.922981
854279	CEX1	YOR112W	S000005638	Component of nuclear aminoacylation-dependent tRNA export pathway; cytoplasmic; interacts with nuclear pore component Nup116p; copurifies with tRNA export receptors Los1p and Msn5p, as well as eIF-1a; required for activation of RAN GTPase Gsp1p and dissociation of receptor-tRNA-Gsp1p export complex; recruits Rna1p from cytoplasm to NPC, facilitates Rna1p activation of Gsp1p GTPase activity by ena…	0.0152519	0.00116907	0.199586	-0.110219	0.498432	0.480849	0.251792	0.686011	0.227833	-0.0708203	0.316263	0.337282	0.155841	0.393994	0.12142	-0.208094	0.0717232	0.58418	0.595342	0.765512	-0.298818	-0.693036	0.0307047	-0.0124573	0.476796	0.610199	0.479903	0.752006	0.898666	0.525256	0.00316499	-0.401887	-0.127811	0.611477	0.848463	0.249001	0.330253	0.786932	0.881716	0.753798	-0.16874	-0.63804	-0.0595119	0.361494	0.783754
850787	CHA4	YLR098C	S000004088	DNA binding transcriptional activator; mediates serine/threonine activation of the catabolic L-serine (L-threonine) deaminase (CHA1); Zinc-finger protein with Zn[2]-Cys[6] fungal-type binuclear cluster domain	0.0549859	5.65313e-06	0.17028	0.293594	0.262145	0.777192	0.459905	0.956894	0.293561	0.151805	0.123153	0.379885	0.232622	0.474426	0.131498	0.157158	-0.237011	-0.00419966	0.148458	0.736123	0.456955	-0.294163	-0.19342	-0.548337	0.169257	0.758012	0.651032	0.363238	0.67622	0.369096	-0.0654852	0.336163	-0.368023	0.486262	0.718657	0.578552	0.212926	0.216544	0.522428	0.785245	0.309219	-0.0211917	-0.370301	-0.12442	0.563979
856911	CHD1	YER164W	S000000966	Chromatin remodeler that regulates various aspects of transcription; acts in in conjunction with Isw1b to regulate chromatin structure and maintain chromatin integrity during transcription elongation by RNAP II by preventing trans-histone exchange over coding regions; contains a chromo domain, a helicase domain and a DNA-binding domain; component of both the SAGA and SLIK complexes	0.102006	0.00263308	0.278217	0.0659758	0.634971	0.576471	0.0583449	0.541174	0.141727	0.0403341	0.493794	0.448864	0.0419358	0.386413	0.102912	-0.804859	-0.236836	0.123233	-0.0371103	0.108033	-0.505282	-0.464911	0.212276	-0.154975	-0.191597	-0.718911	-0.571342	-0.449958	-0.0492499	-0.463554	0.00378559	-0.119014	-0.541386	0.401257	-0.561069	-0.922421	-0.41006	-0.0745472	-0.0487351	-0.0919747	-0.403732	-0.418674	-0.03837	0.0303291	-0.369824
851860	CIA1	YDR267C	S000002675	Component of cytosolic iron-sulfur protein assembly (CIA) machinery; acts at late step of Fe-S cluster assembly; forms CIA targeting complex with Cia2p and Met18p that directs Fe-S cluster incorporation into subset of proteins involved in methionine biosynthesis, DNA replication and repair, transcription, telomere maintenance; contains WD40 repeats; human homolog CIAO1 can complement yeast cia1 n…	0.0311815	0.0021683	0.961452	0.244643	0.306568	0.429133	0.2538	0.447901	0.190387	0.182042	0.207719	0.298544	0.1629	0.285918	0.110082	0.513452	0.515286	0.785779	0.677628	0.84635	-0.138339	-0.402442	0.197093	0.0107896	0.856061	0.767556	0.743543	0.810993	0.805051	0.642994	-0.17296	-0.147545	0.0697425	0.375324	0.972694	0.654136	0.643556	0.825508	0.76291	0.777853	-0.159905	-0.293494	0.142522	0.187161	0.942392
854531	CIN1	YOR349W	S000005876	Tubulin folding factor D involved in beta-tubulin (Tub2p) folding; isolated as mutant with increased chromosome loss and sensitivity to benomyl	0.573071	0.00612946	0.177469	-0.126568	0.585113	0.64196	0.14362	0.448193	0.329371	-0.0860705	0.395876	0.398324	0.096114	0.284034	0.196025	-0.373345	0.318579	0.451541	0.459131	0.642184	-0.776319	-0.202832	0.0250459	-0.0614241	0.405532	0.759896	0.560566	0.136075	0.4587	0.380433	0.0508298	0.526503	-0.397651	0.199782	0.570023	0.489878	0.700907	0.384042	0.68697	0.719168	-0.396707	0.371339	-0.35371	0.149788	0.759362
852865	CKB1	YGL019W	S000002987	Beta regulatory subunit of casein kinase 2 (CK2); a Ser/Thr protein kinase with roles in cell growth and proliferation; CK2, comprised of CKA1, CKA2, CKB1 and CKB2, has many substrates including transcription factors and all RNA polymerases	0.0706116	0.000953064	0.572524	0.187733	0.161854	0.670216	0.324635	0.517785	0.259917	0.0923109	0.0798309	0.349225	0.155596	0.241629	0.114187	-0.0245014	-0.0450717	0.578178	0.577546	0.708808	0.0325103	-0.832719	0.0451626	0.0217366	0.465578	0.446865	0.757249	0.856494	0.927397	0.670199	-0.510987	-0.191255	-0.0239673	0.502876	0.959526	0.203951	0.34329	0.799459	0.833948	0.79313	-0.23028	-0.638356	0.0177179	0.26174	0.776587
855496	CNM67	YNL225C	S000005169	Component of the spindle pole body outer plaque; required for spindle orientation and mitotic nuclear migration; CNM67 has a paralog, ADY3, that arose from the whole genome duplication	0.0217303	0.00813039	0.255644	-0.0497508	0.0686234	0.420985	0.0718771	0.757804	0.388518	-0.023479	0.0330326	0.249381	0.0379696	0.394735	0.198767	-0.629052	-0.851576	-0.307387	-0.358547	-0.0578872	0.448115	-0.664764	0.0411263	-0.395643	-0.573922	-0.222121	-0.349949	0.222821	0.591871	0.187837	0.220533	-0.7416	-0.449718	0.560827	0.124531	-0.561973	-0.782548	-0.128078	-0.00259549	0.0403882	0.427881	-0.81802	-0.168551	-0.0436713	-0.368037
853017	COG2	YGR120C	S000003352	Essential component of the conserved oligomeric Golgi complex; a cytosolic tethering complex that functions in protein trafficking to mediate fusion of transport vesicles to Golgi compartments; the components of the Golgi complex are Gog1p through Cog8p	0.0233383	0.00038653	0.122948	0.205152	-0.0711548	0.63368	0.147814	0.645536	0.763434	0.110675	-0.0342597	0.293814	0.0728159	0.297022	0.335663	0.842403	0.160528	0.220096	0.179002	0.259333	0.63935	-0.0922373	0.0688686	-0.0329114	0.398575	0.612201	0.768387	0.500346	0.769006	0.630307	-0.35974	0.300656	-0.30144	0.342418	0.841985	0.804764	0.692571	0.491893	0.699624	0.61331	-0.0712762	0.216096	-0.225018	0.271652	0.837743
853489	CPR7	YJR032W	S000003793	Peptidyl-prolyl cis-trans isomerase (cyclophilin); catalyzes the cis-trans isomerization of peptide bonds N-terminal to proline residues; binds to Hsp82p and contributes to chaperone activity; plays a role in determining prion variants	0.558807	0.000124552	0.267425	0.0495944	0.61913	0.707383	0.444716	0.660834	0.165498	0.0238014	0.3282	0.368691	0.221672	0.321676	0.0827176	-0.727355	-0.151075	0.24775	0.231835	0.326643	-0.536258	-0.523488	0.0391401	-0.0333914	0.00738313	0.293603	0.425173	0.29186	0.241192	-0.547013	-0.244203	0.146235	0.0864839	0.8521	0.214083	-0.576871	0.0819467	0.413591	0.36934	0.0290586	-0.680527	-0.451236	0.0877085	0.438124	0.126112
850576	CSS2	YFR020W	S000001916	Protein of unknown function, secreted when constitutively expressed; SWAT-GFP fusion protein localizes to the endoplasmic reticulum (ER) and extracellular region, while mCherry fusion protein localizes to the ER and vacuole; mRNA identified as translated by ribosome profiling data; CSS2 is a non-essential gene	0.0116987	4.90361e-05	0.72003	0.317436	0.516137	0.750502	0.446473	0.596058	0.222706	0.218322	0.326542	0.541232	0.318713	0.37082	0.121863	0.0911074	0.0282827	0.455163	0.732793	0.868758	0.0553323	-0.57489	-0.316253	0.0581603	0.552795	0.513815	0.263263	0.381436	0.825866	0.666768	0.180811	-0.178747	-0.532897	0.377879	0.669925	0.277912	0.130801	0.450484	0.816142	0.833532	0.11246	-0.438935	-0.42796	0.198815	0.635806
853450	CTK2	YJL006C	S000003543	Beta subunit of C-terminal domain kinase I (CTDK-I); which phosphorylates both RNA pol II subunit Rpo21p to affect transcription and pre-mRNA 3' end processing, and ribosomal protein Rps2p to increase translational fidelity; relocalizes to the cytosol in response to hypoxia	0.016827	1.94241e-05	0.4383	0.121385	0.443037	0.545432	0.590969	0.604884	0.813013	0.0613222	0.224673	0.324327	0.357026	0.360886	0.459458	-0.756378	-0.98149	-0.721448	-0.472885	-0.266781	0.485119	-0.273573	-0.369767	-0.331376	-0.835935	-0.200542	-0.69255	-0.328813	0.0276024	0.39638	0.675473	-0.434866	-0.476063	-0.361466	-0.237074	-0.612818	-0.958769	-0.636551	-0.325253	-0.0394186	0.599939	-0.358734	-0.442607	-0.371997	-0.683116
854928	CTK3	YML112W	S000004580	Gamma subunit of C-terminal domain kinase I; CTDK-I phosphorylates RNA polymerase II subunit Rpo21p to affect transcription and pre-mRNA 3' end processing, and also phosphorylates ribosomal protein Rps2p to increase translational fidelity; protein abundance increases in response to DNA replication stress	0.0813386	0.00245732	0.239557	0.0675566	0.189027	0.667189	0.177069	0.664165	0.216587	0.0310633	0.101603	0.368229	0.0899475	0.339668	0.109308	-0.781379	-0.511666	0.0112258	-0.110189	0.153105	-0.134167	-0.662273	0.154441	-0.292485	-0.305462	-0.571753	0.105961	0.183413	0.366253	-0.0907903	-0.705785	-0.112042	-0.217204	0.554068	0.0394624	-0.846793	-0.35113	0.0863399	0.0697838	0.0800536	-0.402645	-0.559985	0.0275669	0.00821666	-0.219697
850421	CTR86	YCR054C	S000000650	Essential protein of unknown function; with orthologs in Ashbya gossypii and Candida albicans; similar to human ATXN10, mutations in which cause spinocerebellar ataxia type 10; codon usage corresponds to that observed for yeast genes expressed at low levels; relative distribution to the nucleus increases upon DNA replication stress	0.223063	9.84072e-06	0.109568	-0.0295938	0.319572	0.689447	0.428231	0.848617	0.951411	-0.0166935	0.188284	0.403341	0.255532	0.51243	0.496885	-0.79998	-0.710946	-0.455295	-0.398399	0.15335	0.0993042	-0.288442	-0.106903	-0.657289	-0.580611	0.455601	0.618535	0.528227	0.779957	0.890979	-0.326791	0.0737019	-0.277886	0.0955966	0.834517	-0.130006	0.082468	0.175257	0.447842	0.931637	-0.234321	-0.130817	-0.331349	-0.365157	0.37262
852886	CUL3	YGR003W	S000003235	Ubiquitin-protein ligase; forms a complex with Elc1p that polyubiquitylates monoubiquitylated RNA polymerase II to trigger its proteolysis; cullin family member with similarity to Cdc53p and human CUL3	0.840838	0.000280483	0.0909774	-0.228725	0.423524	0.561845	0.355398	0.666138	0.705012	-0.137461	0.281428	0.351204	0.223342	0.403303	0.446361	-0.950626	-0.488542	-0.338094	-0.383772	-0.383771	-0.332664	-0.164361	0.031836	-0.101666	-0.630955	0.686505	0.85021	0.632758	0.774712	0.369911	-0.388935	0.226506	-0.131008	0.610031	0.864303	-0.514393	0.24168	0.212396	0.298538	-0.113286	-0.820096	0.0207435	-0.0926643	0.49091	0.0743267
855281	CUS1	YMR240C	S000004853	Protein required for assembly of U2 snRNP into the spliceosome; forms a complex with Hsh49p and Hsh155p	0.125542	6.09209e-05	0.080407	0.0146229	0.223337	0.837731	0.295707	0.835881	0.476589	0.00742332	0.126872	0.506162	0.173284	0.48865	0.255462	-0.78211	-0.718402	-0.245374	-0.216331	0.176162	0.126606	-0.579511	-0.055564	-0.449802	-0.462078	-0.183775	0.273743	0.170344	0.715233	0.502278	-0.530035	0.117719	-0.676165	0.402428	0.392358	-0.800887	-0.553053	-0.157191	0.0945567	0.370554	-0.101324	-0.488669	-0.3305	-0.250948	-0.266484
855612	CYB5	YNL111C	S000005055	Cytochrome b5; involved in the sterol and lipid biosynthesis pathways; acts as an electron donor to support sterol C5-6 desaturation	0.0150015	0.00110761	0.142824	0.293382	0.61916	0.7128	0.457076	-0.146028	0.164831	0.187575	0.391281	0.410816	0.263792	-0.106717	0.113823	-0.0595157	0.350707	0.117055	-0.507711	-0.411035	-0.503128	0.286568	0.799254	-0.231174	-0.11175	0.0583921	-0.119897	-0.539589	-0.874982	-0.371827	0.210052	0.572276	0.382839	-0.734948	-0.500986	0.0339047	-0.0123872	-0.421734	-0.858571	-0.413763	0.0495735	0.550147	0.5202	-0.672253	-0.44677
854847	DAL2	YIR029W	S000001468	Allantoicase; converts allantoate to urea and ureidoglycolate in the second step of allantoin degradation; expression sensitive to nitrogen catabolite repression and induced by allophanate, an intermediate in allantoin degradation	0.856817	0.000106642	0.80397	0.152036	0.275838	0.399153	0.654445	0.619716	0.663417	0.114938	0.19986	0.308053	0.464987	0.444428	0.476567	-0.540287	-0.97247	-0.563381	-0.448068	-0.357545	0.689801	-0.474234	-0.189088	-0.209222	-0.75297	0.659891	0.703456	0.957303	0.6346	0.431838	-0.229918	-0.394548	0.481645	0.370874	0.887843	0.492242	0.312813	0.831899	0.511597	0.320002	0.0965609	-0.720428	0.468985	0.327122	0.64836
856227	DBF20	YPR111W	S000006315	Ser/Thr kinase involved in late nuclear division; one of the mitotic exit network (MEN) proteins; necessary for the execution of cytokinesis; also plays a role in regulating the stability of SWI5 and CLB2 mRNAs; DBF20 has a paralog, DBF2, that arose from the whole genome duplication	0.2057	0.000707975	0.104324	-0.156825	0.65699	0.584989	0.116464	0.695865	0.411973	-0.0912903	0.412114	0.371059	0.079151	0.414207	0.232781	-0.814652	-0.327891	-0.0228639	0.160548	0.378708	-0.3999	-0.384078	-0.233754	-0.175629	-0.148016	0.335272	0.124692	0.086674	0.722291	0.432057	0.177547	0.0414391	-0.797348	0.481576	0.42661	-0.34902	-0.148068	0.0474075	0.652453	0.597515	-0.161727	-0.250896	-0.761691	0.22778	0.207329
856412	DED81	YHR019C	S000001061	Cytosolic asparaginyl-tRNA synthetase; required for protein synthesis, catalyzes the specific attachment of asparagine to its cognate tRNA	0.353055	9.22064e-06	0.367513	0.131984	0.434184	0.86819	0.501349	0.697679	0.552618	0.0730893	0.243537	0.474846	0.255315	0.369399	0.277016	-0.280526	0.0143332	0.558984	0.243274	0.509965	-0.298656	-0.731825	0.442236	-0.202246	0.284828	0.765287	0.970875	0.711972	0.5484	0.438275	-0.462783	0.272859	0.261533	0.255403	0.890443	0.439472	0.779713	0.900943	0.581559	0.654143	-0.546795	-0.222474	0.473121	0.0814778	0.878162
855251	DML1	YMR211W	S000004824	Essential protein involved in mtDNA inheritance; may also function in the partitioning of the mitochondrial organelle or in the segregation of chromosomes, exhibits regions similar to members of a GTPase family	0.195893	0.000537056	0.59183	0.0791479	0.601681	0.473968	0.419526	0.2482	0.378221	0.0456086	0.383542	0.266236	0.259562	0.160692	0.240859	-0.758811	-0.159509	-0.46386	-0.37661	-0.27177	-0.557047	0.420569	-0.145955	-0.204609	-0.508678	0.0190183	-0.0563371	-0.684326	-0.72214	-0.287743	0.0902797	0.846859	-0.00467791	-0.6257	-0.473871	-0.479828	-0.133502	-0.669786	-0.633886	-0.331187	-0.310961	0.729745	-0.0968026	-0.470622	-0.584891
851866	DON1	YDR273W	S000002681	Meiosis-specific component of the spindle pole body; subunit of the leading edge protein (LEP) complex (Ssp1-Ady3-Don1-Irc10) that forms a ring-like structure at the leading edge of the prospore membrane (PSM) during meiosis II; required for PSM growth and closure; DON1 has a paralog, CUE5, that arose from the whole genome	0.030841	2.17732e-06	0.423996	0.365533	0.475551	0.583166	0.270589	0.708981	1.04062	0.325991	0.306572	0.420222	0.193047	0.522992	0.659612	0.747407	0.0849987	0.121132	-0.147833	0.117754	0.639891	-0.0550001	0.349511	-0.30475	0.206914	0.738144	0.398582	0.390108	0.59627	0.73927	0.233972	-0.0192137	-0.230843	0.0149586	0.711215	0.825264	0.314514	0.323441	0.357337	0.566925	0.427431	-0.0361098	-0.0180568	-0.114926	0.583943
851976	DXO1	YDR370C	S000002778	mRNA 5'-end-capping quality-control protein; has distributive, 5'-3' exoRNase activity; similar to Rai1p;	0.133788	0.00321833	0.364284	-0.140255	0.553629	0.479555	0.383438	0.237983	0.531188	-0.054089	0.223958	0.198006	0.168889	0.101426	0.212275	-0.932307	-0.65958	-0.493764	-0.115155	0.010781	-0.0979968	-0.171857	-0.516792	-0.156442	-0.5595	0.0437377	-0.33472	-0.427764	0.0327994	0.55817	0.467128	0.150515	-0.615394	-0.516682	-0.0772274	-0.665763	-0.660421	-0.586178	-0.0680408	0.297092	0.16961	-0.0489333	-0.700374	-0.383157	-0.45314
851962	EAF1	YDR359C	S000002767	Component of the NuA4 histone acetyltransferase complex; acts as a platform for assembly of NuA4 subunits into the native complex; required for initiation of pre-meiotic DNA replication, likely due to its requirement for expression of IME1	0.091519	0.00185153	0.156619	0.0778888	0.518804	0.632454	-0.0328831	0.730936	0.223889	0.0489051	0.379339	0.42009	-0.022415	0.475914	0.13003	-0.423609	0.141947	0.374062	0.253497	0.644386	-0.603159	-0.322307	0.181206	-0.323735	0.266844	0.144733	0.405207	0.191938	0.767047	0.480787	-0.367819	0.25504	-0.712735	0.489458	0.516266	-0.230707	0.350183	0.396027	0.651482	0.772526	-0.673657	-0.0883761	-0.292741	0.0515414	0.510666
856923	ECM32	YER176W	S000000978	DNA dependent ATPase/DNA helicase; helicase belonging to the Dna2p- and Nam7p-like family of helicases that is involved in modulating translation termination; interacts with the translation termination factors, localized to polysomes	0.0107688	0.000620118	0.119591	-0.138132	0.684857	0.614944	0.197601	0.599766	0.304739	-0.0779177	0.469973	0.38542	0.113793	0.325315	0.160882	-0.484496	0.215285	0.516824	0.418988	0.419992	-0.756813	-0.421076	0.163409	0.109991	0.312311	0.430192	0.727924	0.773875	0.946336	0.501501	-0.490567	-0.117503	-0.158769	0.695529	0.892019	-0.156745	0.488558	0.72909	0.73645	0.534429	-0.774727	-0.360195	0.0466336	0.397115	0.634007
852321	EDS1	YBR033W	S000000237	Putative zinc cluster protein, predicted to be a transcription factor; not an essential gene; EDS1 has a paralog, RGT1, that arose from the whole genome duplication	0.132811	3.28263e-05	0.0702848	0.270202	0.0430468	0.487643	0.533313	1.45594	1.1585	0.199286	0.0280593	0.293171	0.354427	0.861375	0.628714	0.475542	-0.0349361	-0.364424	-0.205308	0.328236	0.519733	0.444734	-0.229229	-0.587932	0.00239282	0.549134	0.75997	0.720967	0.926065	0.605704	-0.41216	-0.00598422	-0.204111	0.565686	0.928474	0.685571	0.711331	0.561319	0.811038	0.68894	-0.214199	0.146682	-0.272803	0.336951	0.884494
851993	EFT2	YDR385W	S000002793	Elongation factor 2 (EF-2), also encoded by EFT1; catalyzes ribosomal translocation during protein synthesis; contains diphthamide, the unique posttranslationally modified histidine residue specifically ADP-ribosylated by diphtheria toxin; EFT2 has a paralog, EFT1, that arose from the whole genome duplication	0.726093	3.67343e-05	0.529411	0.303473	0.720275	0.753786	0.458304	0.402949	0.236298	0.174773	0.422989	0.447815	0.269507	0.253531	0.147146	-0.814844	-0.411092	-0.0207243	-0.213331	0.101562	-0.29485	-0.49219	0.24204	-0.371407	-0.334075	-0.00665978	-0.423872	-0.772901	-0.895531	-0.66133	0.5295	0.500795	0.0958115	-0.471437	-0.736239	-0.506034	-0.649493	-0.737245	-0.970337	-0.55765	0.315516	0.167567	0.238273	-0.66974	-0.895074
856070	EGD1	YPL037C	S000005958	Subunit beta1 of the nascent polypeptide-associated complex (NAC); involved in protein targeting, associated with cytoplasmic ribosomes; enhances DNA binding of the Gal4p activator; homolog of human BTF3b; EGD1 has a paralog, BTT1, that arose from the whole genome duplication	0.0448215	0.000733763	0.433378	0.141757	0.173869	0.651202	0.664185	0.249857	0.323261	0.0708687	0.0831883	0.303218	0.279671	0.115032	0.143272	0.502607	0.474661	0.90521	0.543284	0.496275	-0.0977965	-0.614064	0.527261	0.190931	0.763972	0.629902	0.797958	0.609845	0.0427494	0.163724	-0.379444	0.191153	0.764119	-0.10965	0.583785	0.651099	0.766461	0.781104	0.227537	0.300897	-0.318406	-0.0784561	0.760147	-0.0130827	0.710796
856600	EGD2	YHR193C	S000001236	Alpha subunit of the nascent polypeptide-associated complex (NAC); involved in protein sorting and translocation; associated with cytoplasmic ribosomes	0.0446402	0.000561697	0.0955767	0.227219	-0.0981734	0.611205	0.861341	0.192599	0.465805	0.0881543	-0.0414024	0.236761	0.318256	0.0759691	0.170581	-0.290243	0.0464777	0.455239	0.68631	0.784922	-0.349033	-0.551976	-0.257354	0.0831986	0.443497	0.124006	0.711378	0.547236	0.100089	0.361717	-0.775824	0.165635	0.607591	-0.235114	0.490194	0.0333982	0.657757	0.620243	0.277694	0.541806	-0.798606	-0.000139322	0.480885	-0.190547	0.565318
855491	ELA1	YNL230C	S000005174	Elongin A; F-box protein that forms a heterodimer with Elc1p and is required for ubiquitin-dependent degradation of the RNA Polymerase II subunit Rpo21p; subunit of the Elongin-Cullin-Socs (ECS) ligase complex	0.0743697	1.54498e-05	0.238827	0.271752	0.573173	0.608409	0.238337	0.724407	0.948328	0.145269	0.360229	0.416076	0.154728	0.443524	0.570837	-0.929316	-0.645772	-0.238485	-0.291701	-0.240859	-0.112472	-0.496883	0.049015	-0.128117	-0.583942	-0.429336	-0.259438	0.100382	0.6188	0.571518	-0.10117	-0.462843	-0.64805	0.211209	0.159609	-0.83988	-0.561691	-0.0968205	0.161228	0.167277	-0.129392	-0.58059	-0.333838	0.0366624	-0.285658
851608	ENA5	YDR038C	S000002445	Protein with similarity to P-type ATPase sodium pumps; member of the Na+ efflux ATPase family	0.0654469	0.00179355	0.0301185	-0.0770822	0.430952	0.381426	0.0270825	1.05489	0.162984	-0.0388113	0.257027	0.221694	0.015704	0.566524	0.0911706	-0.874191	-0.371392	-0.167446	-0.243248	0.127158	-0.404413	-0.245125	0.0830346	-0.434845	-0.381696	-0.126712	0.0759629	0.185963	0.580078	-0.18407	-0.222799	-0.153409	-0.484252	0.917817	0.167711	-0.790469	-0.235031	0.0118464	0.257884	-0.0422716	-0.493176	-0.313187	-0.310307	0.368472	-0.171943
852962	ENV11	YGR071C	S000003303	Protein proposed to be involved in vacuolar functions; mutant shows defect in CPY processing and fragmented vacuoles; deletion mutant has increased glycogen accumulation and displays elongated buds; green fluorescent protein (GFP)-fusion protein localizes to the nucleus; ENV11 has a paralog, VID22, that arose from the whole genome duplication	0.0119258	0.000595535	0.0846313	0.208001	0.82914	0.621672	0.178492	0.440375	-0.0979814	0.11848	0.577316	0.422135	0.127574	0.27491	-0.0548411	-0.444999	0.0901428	0.357105	0.559118	0.710024	-0.559022	-0.365084	-0.228127	-0.00278965	0.341596	-0.466702	-0.476386	-0.424144	0.296726	0.175254	0.135884	-0.0335375	-0.944381	0.200078	-0.237367	-0.528045	-0.116758	0.110782	0.549953	0.619403	-0.380356	-0.296318	-0.547012	0.0762388	0.171943
853086	ERG1	YGR175C	S000003407	Squalene epoxidase; catalyzes the epoxidation of squalene to 2,3-oxidosqualene; plays an essential role in the ergosterol-biosynthesis pathway and is the specific target of the antifungal drug terbinafine; human SQLE functionally complements the lethality of the erg1 null mutation	0.359648	0.000575662	0.737571	0.248581	0.351966	0.428857	0.118496	0.515899	0.586103	0.146883	0.205988	0.270735	0.0756158	0.329171	0.397815	-0.524122	-0.773011	-0.632976	-0.835407	-0.753721	0.453668	-0.128564	0.207489	-0.302995	-0.90813	-0.294937	-0.732121	-0.710476	-0.135858	-0.29648	0.631131	0.0271349	-0.781355	0.124631	-0.576649	-0.518254	-0.899461	-0.786983	-0.674071	-0.687236	0.619485	-0.0818902	-0.203208	-0.165404	-0.927801
855259	ESC1	YMR219W	S000004832	Protein involved in telomeric silencing; required for quiescent cell telomere hypercluster localization at nuclear membrane vicinity; interacts with PAD4-domain of Sir4p	0.156314	0.000140112	0.259762	0.0302837	0.629645	0.664659	0.128061	0.765651	0.288605	0.0188098	0.465596	0.48641	0.0874272	0.494839	0.1727	-0.575318	-0.0326693	0.361409	0.273906	0.510715	-0.533995	-0.526205	0.138415	-0.164249	0.1583	0.13468	0.335135	0.448845	0.936919	0.482194	-0.289237	-0.178272	-0.58293	0.702925	0.617142	-0.391793	0.134939	0.502165	0.667008	0.636625	-0.562479	-0.503039	-0.169981	0.207081	0.421804
856932	FAU1	YER183C	S000000985	5,10-methenyltetrahydrofolate synthetase; involved in folic acid biosynthesis	0.0320082	0.00135493	0.18813	0.0597687	0.342679	0.0265765	0.323744	0.771216	0.598731	0.023962	0.14706	0.0126783	0.147691	0.346855	0.261853	-0.896485	-0.845314	-0.663633	-0.550856	-0.183708	0.172762	-0.17889	-0.193573	-0.513077	-0.815389	-0.357762	-0.412693	0.265915	0.497825	0.313133	0.164258	-0.878783	-0.272941	0.316571	0.0916119	-0.796475	-0.796113	-0.271926	-0.0598622	0.0680875	0.210538	-0.642186	-0.289106	-0.143808	-0.474831
856788	FCY21	YER060W	S000000862	Putative purine-cytosine permease; very similar to Fcy2p but cannot substitute for its function	0.0562393	0.000126651	0.615857	0.168369	0.703323	0.489852	0.534094	0.475288	0.127762	0.0641268	0.301229	0.203296	0.213648	0.205325	0.0561983	-0.887695	-0.303798	-0.230626	-0.363003	-0.117508	-0.503418	-0.07486	0.14975	-0.341659	-0.470928	-0.443633	-0.432255	-0.474569	-0.868479	-0.838892	0.103131	0.0899363	0.461848	-0.259656	-0.777846	-0.790533	-0.419408	-0.396118	-0.68799	-0.518787	-0.260019	0.000934928	0.338798	-0.351459	-0.70736
856789	FCY22	YER060W-A	S000002958	Putative purine-cytosine permease; very similar to Fcy2p but cannot substitute for its function	0.166292	0.00299721	0.535432	0.155152	0.444312	0.402121	0.0443712	0.317027	0.403468	0.17838	0.459185	0.396466	0.0430237	0.291525	0.339364	0.534034	0.826761	0.948609	0.675571	0.602575	-0.511745	-0.226914	0.418155	0.251962	0.940436	0.733025	0.587833	0.48263	0.751332	0.709726	-0.0105317	0.0960411	-0.302853	0.240643	0.825778	0.720106	0.765011	0.755074	0.798423	0.737462	-0.247565	-0.0453664	0.00310429	0.272472	0.970679
850451	FIG2	YCR089W	S000000685	Cell wall adhesin, expressed specifically during mating; may be involved in maintenance of cell wall integrity during mating; FIG2 has a paralog, AGA1, that arose from the whole genome duplication	0.042334	4.7791e-05	0.13977	1.00746	0.833172	0.361648	0.106099	0.509636	0.500767	0.626474	0.623849	0.265704	0.0848296	0.421032	0.398078	-0.614613	-0.145782	-0.435309	-0.681263	-0.310346	-0.430211	0.399626	0.277709	-0.551391	-0.557574	-0.879144	-0.859839	-0.736809	-0.385145	-0.200028	0.208476	-0.0990878	-0.501359	-0.287146	-0.794858	-0.922197	-0.749137	-0.746111	-0.542274	-0.267045	0.0253954	0.053421	-0.315085	-0.418883	-0.834416
855392	FIG4	YNL325C	S000005269	Phosphatidylinositol 3,5-bisphosphate (PtdIns[3,5]P) phosphatase; required for efficient mating and response to osmotic shock; physically associates with and regulated by Vac14p; contains a SAC1-like domain; homologous to human FIG4, which is associated with CMT4J, a form of Charcot-Marie-Tooth disorder	0.0275061	0.000494739	0.150971	-0.109629	0.474183	0.577793	0.241582	0.730124	0.642417	-0.051681	0.258188	0.312772	0.131267	0.372208	0.28812	-0.77871	-0.328756	0.000777564	0.136522	0.435466	-0.362862	-0.416891	-0.171645	-0.262778	-0.127736	0.108373	0.328654	0.445398	0.878294	0.855504	-0.307345	-0.181846	-0.513399	0.25546	0.673884	-0.419393	-0.0155274	0.254796	0.585868	0.757615	-0.399752	-0.361486	-0.399226	-0.0165434	0.305832
852738	FLC3	YGL139W	S000003107	Putative FAD transporter, similar to Flc1p and Flc2p; localized to the ER; FLC3 has a paralog, FLC1, that arose from the whole genome duplication	0.0528188	0.000830868	0.201627	0.00109494	0.775666	0.575914	0.279049	0.325001	0.142226	0.00062308	0.386852	0.278563	0.149736	0.168787	0.0685811	0.344567	0.576546	0.395391	0.649133	0.896442	-0.384712	0.198806	-0.290622	-0.0753464	0.724888	0.77268	0.20106	-0.174149	0.0313607	0.121497	0.518358	0.487968	-0.273314	-0.0818285	0.208294	0.756092	0.400315	0.027377	0.296249	0.471046	0.249729	0.469633	-0.337998	-0.0963178	0.468069
853977	FLO10	YKR102W	S000001810	Member of the FLO family of cell wall flocculation proteins; not expressed in most lab strains; overproduction induces flocculation that can be inhibited by mannose, sucrose, or glucose; overproduction also promotes haploid invasive growth and diploid filamentous growth	0.102705	0.000228146	0.212119	0.651092	0.929216	0.5956	-0.093845	0.313975	0.319515	0.495939	0.585044	0.432216	-0.0740179	0.248976	0.240806	0.677236	0.134628	0.24742	-0.20175	0.0735572	0.506943	-0.161656	0.587144	-0.328753	0.217746	-0.0618693	-0.715182	-0.786645	-0.371108	-0.165304	0.842772	0.150754	-0.585977	-0.304114	-0.579724	0.147027	-0.622617	-0.654848	-0.405052	-0.1311	0.934582	0.0910159	-0.366215	-0.381256	-0.471908
856618	FLO5	YHR211W	S000001254	Lectin-like cell wall protein (flocculin) involved in flocculation; binds mannose chains on the surface of other cells, confers floc-forming ability that is chymotrypsin resistant but heat labile; important for co-flocculation with other yeasts, mediating interaction with specific species; FLO5 has a paralog, FLO1, that arose from a segmental duplication	0.014504	0.000678019	0.404998	0.28951	0.606998	0.50417	0.0483764	0.268343	0.431208	0.228017	0.419915	0.316242	0.0308887	0.180317	0.244873	0.657555	0.873112	0.769692	0.47911	0.616985	-0.446854	0.071759	0.426618	-0.0109537	0.876719	0.730527	0.542121	0.262507	0.416635	0.701478	0.0447925	0.333544	-0.174815	-0.174472	0.653985	0.753515	0.759095	0.547641	0.483776	0.716065	-0.206673	0.22545	0.122804	-0.104131	0.824087
851236	FLO9	YAL063C	S000000059	Lectin-like protein with similarity to Flo1p; thought to be expressed and involved in flocculation	0.0259685	0.0040118	0.373923	0.301784	0.717712	0.352743	0.250362	0.702318	0.391645	0.132635	0.353696	0.187468	0.140226	0.366266	0.197864	-0.943589	-0.669664	-0.501371	-0.260444	0.0564588	-0.096524	-0.174406	-0.343222	-0.385897	-0.597108	-0.641097	-0.81773	-0.507298	0.0203801	-0.0574196	0.393259	-0.353743	-0.706391	0.0831986	-0.52104	-0.858105	-0.80855	-0.54763	-0.128292	-0.00134651	0.164639	-0.288021	-0.572445	-0.160931	-0.60647
850749	FRS1	YLR060W	S000004050	Beta subunit of cytoplasmic phenylalanyl-tRNA synthetase; forms a tetramer with Frs2p to generate active enzyme; able to hydrolyze mis-aminoacylated tRNA-Phe, which could contribute to translational quality control	0.016014	0.00255786	0.428695	0.015895	0.390996	0.675027	0.249634	0.432847	0.143352	0.00765562	0.235686	0.397548	0.138672	0.239263	0.0744663	-0.769273	-0.270757	0.148754	0.168347	0.340344	-0.426789	-0.542058	-0.0133698	-0.1274	-0.0783173	-0.726848	0.0126715	0.00753905	0.226925	0.174415	-0.742876	0.00591357	-0.276925	0.112625	-0.0522088	-0.796247	-0.196041	0.112252	0.195534	0.306123	-0.548273	-0.398576	-0.0967303	-0.0587905	-0.0742295
850522	FRS2	YFL022C	S000001872	Alpha subunit of cytoplasmic phenylalanyl-tRNA synthetase; forms a tetramer with Frs1p to form active enzyme; evolutionarily distant from mitochondrial phenylalanyl-tRNA synthetase based on protein sequence, but substrate binding is similar	0.0281589	1.95899e-05	0.375439	0.249104	0.543497	0.802218	0.442757	0.768526	0.226489	0.130626	0.357086	0.499322	0.248149	0.435117	0.122846	-0.597633	-0.0422498	0.360192	0.260448	0.465331	-0.544191	-0.536691	0.153805	-0.135888	0.136811	-0.322142	0.444222	0.484337	0.440302	0.0108434	-0.884043	-0.0879043	0.0928633	0.546099	0.31802	-0.560691	0.144832	0.452554	0.362818	0.34177	-0.743891	-0.423964	0.148231	0.117163	0.224847
851199	FUN19	YAL034C	S000002134	Non-essential protein of unknown function; expression induced in response to heat stress; FUN19 has a paralog, YOR338W, that arose from the whole genome duplication	0.0223376	7.94127e-08	0.0690232	0.558695	0.817268	0.540943	0.157091	1.21406	1.02342	0.315248	0.48309	0.368322	0.110697	0.78474	0.588778	-0.73875	-0.725461	-0.467898	-0.47607	0.12095	0.178894	-0.289892	-0.025565	-0.723136	-0.603456	-0.203006	-0.349043	-0.022814	0.59907	0.489379	0.238502	-0.4109	-0.788379	0.268391	0.124827	-0.508604	-0.621008	-0.236249	0.264941	0.453674	0.276916	-0.468559	-0.652088	-0.118548	-0.179437
854106	GAL11	YOL051W	S000005411	Subunit of the RNA polymerase II mediator complex; associates with core polymerase subunits to form the RNA polymerase II holoenzyme; affects transcription by acting as target of activators and repressors; forms part of the tail domain of mediator	0.855794	0.00201977	0.245782	-0.0136741	0.631907	0.548246	0.0585341	0.54801	0.205293	-0.0099846	0.52015	0.414074	0.0431991	0.413588	0.158239	-0.609743	0.0790809	0.242489	-0.112152	0.0796322	-0.709774	-0.225303	0.467196	-0.221494	-0.0538146	0.448751	0.288273	-0.158707	0.132166	-0.416166	0.084111	0.577567	-0.380106	0.583344	0.0766984	-0.478754	0.319105	0.205052	-0.0512464	-0.202711	-0.882393	0.128534	0.339928	0.137889	-0.0147386
850770	GAL2	YLR081W	S000004071	Galactose permease; required for utilization of galactose; also able to transport glucose	0.0458911	0.000261667	0.560616	0.441437	0.486713	0.667486	0.285628	0.390437	0.258034	0.335647	0.308212	0.444231	0.190404	0.252751	0.145595	0.644141	0.460524	0.670779	0.692342	0.82289	0.0616191	-0.317423	0.0241943	0.05286	0.834738	0.770485	0.418031	0.23575	0.495351	0.637483	0.241713	0.212481	-0.310283	-0.0109088	0.628381	0.736936	0.465332	0.504913	0.637903	0.780762	0.148332	-0.0888087	-0.129478	0.0261283	0.783534
851572	GAL3	YDR009W	S000002416	Transcriptional regulator; involved in activation of the GAL genes in response to galactose; forms a complex with Gal80p to relieve Gal80p inhibition of Gal4p; binds galactose and ATP but does not have galactokinase activity; GAL3 has a paralog, GAL1, that arose from the whole genome duplication	0.0670418	4.72167e-05	0.259762	0.397666	0.842708	1.1388	0.487973	0.780302	0.551196	0.260197	0.67479	0.739922	0.340672	0.483341	0.316093	-0.257409	0.401358	0.584255	0.659055	0.663945	-0.765092	-0.276178	-0.0497854	0.169701	0.552468	0.283799	0.676963	0.250691	0.623179	0.450792	-0.5725	0.519962	-0.451929	0.337475	0.592569	0.000546697	0.614789	0.49087	0.740911	0.649062	-0.777107	0.119082	-0.278615	0.288124	0.659677
850346	GBP2	YCL011C	S000000517	Poly(A+) RNA-binding protein; key surveillance factor for the selective export of spliced mRNAs from the nucleus to the cytoplasm; preference for intron-containing genes; similar to Npl3p; also binds single-stranded telomeric repeat sequence in vitro; relocalizes to the cytosol in response to hypoxia; GBP2 has a paralog, HRB1, that arose from the whole genome duplication	0.010013	0.000789613	0.248852	-0.0644519	0.24623	0.71888	0.308857	0.613518	0.380434	-0.0293348	0.130583	0.375	0.152993	0.290164	0.166	-0.640673	-0.234942	0.250273	0.328437	0.506279	-0.343493	-0.632956	-0.0796675	-0.0908357	0.0697523	0.0833436	0.623402	0.64509	0.864525	0.687992	-0.705204	-0.076931	-0.228069	0.405555	0.767889	-0.379156	0.159959	0.489886	0.651945	0.679827	-0.581489	-0.454917	-0.167402	0.144825	0.433142
850998	GCD7	YLR291C	S000004282	Beta subunit of the translation initiation factor eIF2B; the guanine-nucleotide exchange factor for eIF2; activity subsequently regulated by phosphorylated eIF2; first identified as a negative regulator of GCN4 expression; human homolog EIF2B2 can complement yeast mutant, allows growth down-regulation of yeast gene	0.0195278	0.00374043	0.528258	0.0295953	0.394811	0.650153	0.0926986	0.369488	0.344338	0.0145431	0.241857	0.400894	0.0531135	0.214274	0.19848	-0.871223	-0.42797	9.3106e-05	-0.125832	-0.0581119	-0.329878	-0.541469	0.159291	-0.101054	-0.355634	-0.914719	-0.378055	-0.343493	-0.0371051	-0.0201172	-0.436513	-0.0173619	-0.413909	-0.0268174	-0.419157	-0.93918	-0.437497	-0.114888	-0.103851	-0.0489582	-0.385784	-0.399257	-0.0227762	-0.0824036	-0.398691
856709	GCN4	YEL009C	S000000735	bZIP transcriptional activator of amino acid biosynthetic genes; activator responds to amino acid starvation; expression is tightly regulated at both the transcriptional and translational levels	0.0425839	2.02382e-06	0.406749	0.532479	0.678527	0.798086	0.713042	0.686202	0.134639	0.229648	0.321926	0.389401	0.347748	0.345248	0.0695926	-0.927914	-0.743516	-0.456392	-0.302969	0.0377456	0.0125686	-0.328168	-0.229086	-0.420974	-0.616726	-0.620996	-0.634312	-0.705838	-0.794043	-0.857765	0.181352	0.144634	0.0574123	-0.146629	-0.923604	-0.884426	-0.797914	-0.696359	-0.674721	-0.540404	0.124863	-0.0750258	-0.0808022	-0.313058	-0.921282
851249	GEM1	YAL048C	S000000046	Outer mitochondrial membrane GTPase, subunit of the ERMES complex; potential regulatory subunit of the ERMES complex that links the ER to mitochondria and may promote inter-organellar calcium and phospholipid exchange as well as coordinating mitochondrial DNA replication and growth; cells lacking Gem1p contain collapsed, globular, or grape-like mitochondria; ortholog of metazoan Miro GTPases	0.0129262	0.000474484	0.0311436	-0.1783	0.681872	0.634003	0.10493	0.822664	0.229619	-0.136025	0.547907	0.476106	0.0796928	0.535391	0.141746	-0.281236	0.298204	0.570323	0.579502	0.731993	-0.658438	-0.387966	0.0321496	0.0010251	0.507607	0.639093	0.57294	0.490383	0.841254	0.37616	-0.0856253	0.0668007	-0.406193	0.687951	0.75547	0.295076	0.603007	0.709909	0.972519	0.725691	-0.467674	-0.189692	-0.277707	0.50446	0.865476
852823	GEP7	YGL057C	S000003025	Protein of unknown function; null mutant exhibits a respiratory growth defect and synthetic interactions with prohibitin (phb1) and gem1; authentic, non-tagged protein is detected in highly purified mitochondria in high-throughput studies	0.134039	0.000111928	0.19513	0.318548	0.095153	0.492506	0.420167	0.940484	0.369023	0.151661	0.0449612	0.24908	0.229722	0.476023	0.174582	-0.337502	-0.736951	-0.56881	-0.193886	0.327706	0.594676	-0.169038	-0.51789	-0.572955	-0.425604	-0.154636	-0.0326535	0.0429053	0.707787	0.288086	-0.113333	-0.0988672	-0.837724	0.607201	0.228037	-0.343562	-0.592355	-0.421961	0.214861	0.40497	0.405714	-0.183157	-0.837899	-0.13319	-0.214335
854339	GLN4	YOR168W	S000005694	Glutamine tRNA synthetase; monomeric class I tRNA synthetase that catalyzes the specific glutaminylation of tRNA(Gln); N-terminal domain proposed to be involved in enzyme-tRNA interactions	0.0133818	4.80357e-05	0.188418	-0.0330969	0.514885	0.817003	0.519805	0.668199	0.346994	-0.0149454	0.289724	0.422072	0.27104	0.347852	0.16291	-0.812445	-0.289024	-0.0325613	0.0966241	0.37863	-0.446855	-0.321904	-0.165907	-0.256409	-0.157307	-0.230082	0.505325	0.204628	0.393126	0.455037	-0.869274	0.364654	-0.222732	0.0422322	0.356994	-0.704736	-0.0493288	0.0450974	0.209256	0.447719	-0.642339	-0.122901	-0.204186	-0.183028	0.00126166
856859	GLO3	YER122C	S000000924	ADP-ribosylation factor GTPase activating protein (ARF GAP); involved in ER-Golgi transport; shares functional similarity with Gcs1p	0.0201233	0.00313774	0.315089	-0.0395031	0.435836	0.425091	0.149307	0.689072	0.2111	-0.0235613	0.24233	0.263788	0.0884814	0.389053	0.104006	-0.0948757	-0.0606845	0.355357	0.427031	0.87604	-0.0181152	-0.553522	-0.063395	-0.335884	0.375623	0.58638	0.288382	0.501176	0.826569	0.638129	0.221602	-0.307621	-0.373138	0.407407	0.721695	0.297479	0.138316	0.502743	0.738602	0.881286	0.122522	-0.499544	-0.259766	0.05298	0.646468
852418	GRS1	YBR121C	S000000325	Cytoplasmic and mitochondrial glycyl-tRNA synthase; ligates glycine to the cognate anticodon-bearing tRNA; transcription termination factor that may interact with the 3'-end of pre-mRNA to promote 3'-end formation; GRS1 has a paralog, GRS2, that arose from the whole genome duplication; human homolog GARS implicated in Charcot-Marie-Tooth disease, can complement yeast null mutant	0.0176046	0.00107812	0.711722	0.0551838	0.469523	0.580167	0.319346	0.397877	0.304514	0.0279154	0.269108	0.359601	0.194515	0.257736	0.180353	-0.921379	-0.737584	-0.399581	-0.329174	0.00674427	0.011599	-0.396884	-0.119719	-0.42312	-0.611028	-0.739094	-0.878218	-0.8108	-0.605716	-0.140153	0.371774	-0.0230652	-0.321626	-0.626024	-0.83885	-0.891492	-0.820511	-0.569434	-0.445897	-0.0477523	0.146382	-0.273898	-0.199955	-0.516268	-0.721235
856106	HAT1	YPL001W	S000005922	Catalytic subunit of the Hat1p-Hat2p histone acetyltransferase complex; uses the cofactor acetyl coenzyme A to acetylate free nuclear and cytoplasmic histone H4; involved in telomeric silencing and DNA double-strand break repair	0.105607	1.83757e-05	0.0982447	0.038594	0.287127	0.655943	0.323428	0.918174	0.69871	0.0191287	0.165626	0.377018	0.176768	0.492573	0.359027	-0.887939	-0.572332	-0.175481	-0.24592	0.0588502	-0.163991	-0.488517	0.0756348	-0.369917	-0.458156	-0.000148308	0.522221	0.627859	0.897589	0.564286	-0.660711	-0.181798	-0.293009	0.571085	0.698828	-0.678417	-0.0992594	0.272271	0.393018	0.41014	-0.552863	-0.490844	-0.131844	0.0869932	0.102255
855821	HFI1	YPL254W	S000006175	Adaptor protein required for structural integrity of the SAGA complex; a histone acetyltransferase-coactivator complex that is involved in global regulation of gene expression through acetylation and transcription functions	0.0409492	0.00917922	0.2683	-0.0989792	0.43697	0.554259	0.138397	0.552894	0.102773	-0.0490854	0.261681	0.321081	0.075951	0.286632	0.0536903	-0.726958	-0.13432	0.25546	0.227514	0.3082	-0.557055	-0.512638	0.0549502	-0.0204148	0.00913464	-0.166431	0.316825	0.373553	0.678956	0.0147898	-0.567187	-0.100418	-0.357646	0.84403	0.351136	-0.630589	0.0232838	0.348317	0.449485	0.244912	-0.660041	-0.437864	-0.101242	0.323646	0.148312
852275	HIR1	YBL008W	S000000104	Subunit of the HIR complex; HIR is a nucleosome assembly complex involved in regulation of histone gene transcription; contributes to nucleosome formation, heterochromatic gene silencing, and formation of functional kinetochores	0.191778	0.00691742	0.179539	-0.200839	0.5542	0.426314	0.207897	0.534211	0.158839	-0.114433	0.341242	0.277513	0.130578	0.343388	0.0912276	-0.777038	-0.396297	-0.0738159	-0.0362144	0.398098	-0.275758	-0.402246	-0.0532264	-0.443906	-0.223687	0.364147	-0.240381	0.0320252	0.447487	0.4656	0.668208	-0.347027	-0.523065	0.100431	0.247608	-0.633831	-0.475141	-0.0611269	0.123914	0.557189	-0.0328204	-0.519	-0.238751	-0.400448	-0.131569
853605	HIR3	YJR140C	S000003901	Subunit of the HIR complex; a nucleosome assembly complex involved in regulation of histone gene transcription; involved in position-dependent gene silencing and nucleosome reassembly; ortholog of human CABIN1 protein	0.150971	0.000151643	0.403179	0.0683313	0.771987	0.776714	0.423894	0.468478	0.421927	0.0421305	0.407732	0.424463	0.239015	0.261396	0.21486	0.285827	0.27504	0.574167	0.692302	0.958176	-0.0620744	-0.422425	-0.105374	-0.0824755	0.706574	0.866053	0.31413	0.0622814	0.193395	0.317174	0.468706	0.313787	-0.161068	-0.072547	0.416525	0.808341	0.356218	0.261726	0.411633	0.609918	0.357757	0.0994428	-0.169538	-0.0892384	0.598062
854058	HMI1	YOL095C	S000005455	Mitochondrial inner membrane localized ATP-dependent DNA helicase; required for the maintenance of the mitochondrial genome; not required for mitochondrial transcription; has homology to E. coli helicase uvrD	0.0941761	0.00155325	0.0384372	-0.0797397	1.06274	0.677266	0.255131	0.458521	-0.00884446	-0.049386	0.619372	0.402377	0.173237	0.305866	-0.00592604	-0.858754	-0.407564	-0.413768	-0.211003	0.201572	-0.343222	0.0395962	-0.288229	-0.468471	-0.435288	0.275629	-0.399092	-0.684753	-0.469733	-0.472876	0.780445	0.413877	-0.324522	-0.121294	-0.483337	-0.119234	-0.622165	-0.930042	-0.602934	-0.407669	0.667749	0.4608	-0.485125	-0.354989	-0.725427
856181	HOS1	YPR068C	S000006272	Class I histone deacetylase (HDAC) family member; deacetylates Smc3p on lysine residues at anaphase onset; has sequence similarity to Hda1p, Rpd3p, Hos2p, and Hos3p; interacts with the Tup1p-Ssn6p corepressor complex	0.0114732	0.000446063	0.117968	-0.0204145	0.436985	0.574201	0.03675	0.804526	0.527291	-0.0100203	0.204567	0.298149	0.0190786	0.370818	0.233982	-0.402036	-0.459636	0.185674	0.289556	0.526392	0.179363	-0.830507	-0.117156	-0.160129	0.0345499	0.419422	0.196461	0.326692	0.841291	0.510443	0.170917	-0.189797	-0.625856	0.553716	0.585006	0.151051	-0.0521581	0.343629	0.799475	0.643947	0.217027	-0.527002	-0.550238	0.367318	0.480366
852681	HOS2	YGL194C	S000003162	Histone deacetylase and subunit of Set3 and Rpd3L complexes; required for gene activation via specific deacetylation of lysines in H3 and H4 histone tails; subunit of the Set3 complex, a meiotic-specific repressor of sporulation specific genes that contains deacetylase activity; co-localizes with Cmr1p in nuclear foci in response to DNA damage by MMS	0.0845236	0.00414488	0.375592	-0.0962501	0.329056	0.462334	0.218759	0.651804	0.275468	-0.0482042	0.17075	0.242545	0.107659	0.307848	0.122542	-0.32089	0.0613978	0.516856	0.488155	0.734532	-0.398552	-0.615772	0.0759618	-0.117059	0.393275	0.552456	0.683467	0.815317	0.956086	0.594984	-0.312069	-0.229337	-0.115501	0.61438	0.941652	0.16776	0.469541	0.813677	0.886753	0.798038	-0.426167	-0.497735	-0.0300014	0.323625	0.823347
855208	HOT1	YMR172W	S000004783	Transcription factor for glycerol biosynthetic genes; required for the transient induction of glycerol biosynthetic genes GPD1 and GPP2 in response to high osmolarity; targets Hog1p to osmostress responsive promoters; has similarity to Msn1p and Gcr1p	0.823261	9.73624e-05	0.331101	0.153853	0.498452	0.617489	0.206662	0.953766	0.477594	0.0832891	0.294281	0.362228	0.120046	0.557224	0.277207	-0.801065	-0.502163	-0.276304	-0.516212	-0.036677	-0.165874	-0.264491	0.282263	-0.616286	-0.544802	0.042568	0.192842	0.103618	0.61229	-0.0833335	-0.20136	0.10491	-0.635474	0.857825	0.243678	-0.97576	-0.475011	-0.263411	-0.147747	-0.11482	-0.374913	-0.247443	-0.166517	-0.0720669	-0.487
856323	HPA2	YPR193C	S000006397	Tetrameric histone acetyltransferase; has similarity to Gcn5p, Hat1p, Elp3p, and Hpa3p; acetylates histones H3 and H4 in vitro and exhibits autoacetylation activity; also acetylates polyamines	0.181026	0.00327222	0.354154	-0.286152	0.29756	0.426534	0.324515	0.449723	0.438693	-0.329838	0.321139	0.426635	0.288107	0.426061	0.455174	-0.428267	0.013463	0.199395	-0.354389	-0.491276	-0.445297	-0.250487	0.715788	0.0430054	-0.236388	0.903346	0.84289	0.659818	0.360328	0.0929668	-0.162835	0.180942	0.429456	0.362816	0.742708	0.656283	0.791135	0.70104	0.182335	-0.126005	-0.344433	0.0601716	0.709906	0.356643	0.589663
852516	HPC2	YBR215W	S000000419	Subunit of the HIR complex; HIR is a nucleosome assembly complex involved in regulation of histone gene transcription; mutants display synthetic defects with subunits of FACT, a complex that allows passage of RNA Pol II through nucleosomes	0.209797	0.00399489	0.16052	-0.16856	0.348742	0.611912	0.156651	0.632767	0.180157	-0.0928717	0.210002	0.377529	0.0875456	0.350129	0.0959571	-0.590622	-0.197946	0.328181	0.18859	0.426847	-0.340238	-0.690686	0.201752	-0.188298	0.0577606	0.520284	0.720791	0.768232	0.901207	0.346094	-0.391453	-0.118954	-0.109255	0.793852	0.861688	-0.25254	0.207369	0.705364	0.651025	0.568408	-0.514843	-0.684042	0.122856	0.25508	0.512376
855332	HSH155	YMR288W	S000004901	U2-snRNP associated splicing factor; forms extensive associations with the branch site-3' splice site-3' exon region upon prespliceosome formation; similarity to the mammalian U2 snRNP-associated splicing factor SAP155	0.549112	0.000402906	0.549112	0.0906997	0.461807	0.600566	0.348875	0.593951	0.544934	0.0534942	0.305395	0.374016	0.213127	0.388175	0.327384	-0.814289	-0.318475	-0.139077	-0.332008	0.0885471	-0.411446	-0.216252	0.233369	-0.508507	-0.378638	0.285638	0.739997	0.382524	0.434414	0.701559	-0.650392	0.42282	-0.036286	-0.152063	0.651584	-0.566123	0.0697562	0.057977	-0.0834715	0.401087	-0.654358	0.0104511	0.183368	-0.506671	-0.0228255
856145	HTS1	YPR033C	S000006237	Cytoplasmic and mitochondrial histidine tRNA synthetase; efficient mitochondrial localization requires both a presequence and an amino-terminal sequence; mutations in human ortholog HARS2 are associated with Perrault syndrome	0.066858	0.00072908	0.694864	0.113258	0.44592	0.654644	0.410964	0.402704	0.228325	0.0501237	0.221824	0.342581	0.207053	0.209221	0.109759	-0.839988	-0.5767	-0.134184	-0.0261013	0.264701	-0.110513	-0.549448	-0.147011	-0.297716	-0.331212	-0.881177	-0.729858	-0.613942	-0.490502	-0.01183	0.042029	-0.0995156	-0.203248	-0.608612	-0.711465	-0.883094	-0.643869	-0.28344	-0.166784	0.191177	-0.0686573	-0.434162	-0.169307	-0.402144	-0.457733
852708	HUR1	YGL168W	S000003136	Protein of unknown function; reported null mutant phenotype of hydroxyurea sensitivity may be due to effects on overlapping PMR1 gene	0.0168004	7.3188e-05	0.0252005	0.611235	-0.00195102	0.0149355	0.332875	0.97702	0.776408	0.554472	-0.00152319	0.0114281	0.276327	0.742085	0.50345	0.699087	0.242957	-0.10643	0.00826499	0.412447	0.391769	0.45011	-0.153246	-0.401993	0.280741	0.274383	0.512339	0.711913	0.978718	0.7681	-0.373681	-0.307068	-0.28286	0.469891	0.847486	0.61314	0.541015	0.499377	0.774393	0.838491	-0.0711961	0.0143509	-0.309554	0.141048	0.826062
851352	HXT15	YDL245C	S000002404	Putative transmembrane polyol transporter; supports growth on and uptake of mannitol, sorbitol and xylitol with moderate affinity when overexpressed in a strain deleted for hexose family members; minor hexose transport activity when overexpressed in a similar strain; similarity to hexose transporters; expression is induced by low levels of glucose and repressed by high levels of glucose	0.176209	3.02586e-05	0.250484	0.380349	0.862827	0.621513	0.118101	0.516164	0.29364	0.306392	0.589982	0.52024	0.0880133	0.42121	0.239449	0.0678221	-0.144805	0.3311	-0.273461	-0.00760433	0.250988	-0.627383	0.790121	-0.338299	-0.00537567	0.219088	-0.602086	-0.504243	-0.374162	-0.358586	0.980674	-0.0850722	-0.203231	-0.114695	-0.447538	0.205985	-0.544984	-0.226937	-0.43175	-0.284686	0.895341	-0.384889	0.241658	-0.261439	-0.353218
851944	HXT6	YDR343C	S000002751	High-affinity glucose transporter; member of the major facilitator superfamily, nearly identical to Hxt7p, expressed at high basal levels relative to other HXTs, repression of expression by high glucose requires SNF3; HXT6 has a paralog, HXT1, that arose from the whole genome duplication	0.0352086	6.15407e-06	0.17072	0.736446	0.349538	0.978	0.69538	0.40187	0.206022	0.773405	0.418092	1.15751	0.977962	0.654983	0.302793	-0.569567	-0.904455	-0.690845	-0.363096	0.0655539	0.574488	-0.21719	-0.467582	-0.524838	-0.662121	-0.566171	-0.404592	-0.800974	-0.836048	-0.539258	-0.0543987	0.562847	-0.0170928	-0.518269	-0.818175	-0.673727	-0.678007	-0.907722	-0.806012	-0.401442	0.183891	0.360219	-0.198303	-0.618092	-0.910003
856594	IKI1	YHR187W	S000001230	Subunit of hexameric RecA-like ATPase Elp456 Elongator subcomplex; which is required for modification of wobble nucleosides in tRNA; iki1 mutations confer resistance to the K. lactis toxin zymocin	0.105485	1.6797e-06	0.0918449	0.14645	0.31605	0.638547	0.467625	0.974525	0.864729	0.0749051	0.176603	0.331105	0.23782	0.478719	0.410974	-0.758956	-0.175947	0.0890882	-0.0630324	0.257087	-0.536399	-0.342082	0.199255	-0.336818	-0.149399	0.385644	0.80752	0.778844	0.892671	0.59546	-0.635797	-0.0234886	-0.0842199	0.53369	0.911414	0.0690759	0.678093	0.751695	0.79922	0.646033	-0.788651	-0.150777	-0.00243743	0.364909	0.783901
856819	ILV1	YER086W	S000000888	Threonine deaminase, catalyzes first step in isoleucine biosynthesis; expression is under general amino acid control; ILV1 locus exhibits highly positioned nucleosomes whose organization is independent of known ILV1 regulation	0.141991	0.000194237	0.628407	0.207935	0.62474	0.633933	0.299449	0.505677	0.233563	0.121743	0.379192	0.404057	0.175687	0.295989	0.122554	-0.208542	0.136514	0.594252	0.546497	0.776274	-0.38122	-0.624594	0.106002	-0.0850036	0.486397	0.48127	0.296938	0.554427	0.821631	0.831301	0.105671	-0.368242	-0.295448	0.207988	0.7575	0.0144398	0.208535	0.644833	0.704061	0.88048	-0.249338	-0.601355	-0.0254414	0.0100954	0.635976
850348	ILV6	YCL009C	S000000515	Regulatory subunit of acetolactate synthase; acetolactate synthase catalyzes the first step of branched-chain amino acid biosynthesis; enhances activity of the Ilv2p catalytic subunit, localizes to mitochondria	0.0268487	0.00136866	0.55925	0.0840027	0.299825	0.592082	0.280754	0.594285	0.219423	0.0563755	0.177042	0.367471	0.157299	0.327901	0.117113	0.460958	0.373187	0.814538	0.606994	0.701423	-0.0110908	-0.620769	0.325025	0.0663699	0.762681	0.880708	0.77274	0.747305	0.682519	0.326082	-0.0967396	-0.0251677	0.139289	0.537244	0.883821	0.770849	0.660755	0.865306	0.721981	0.550179	-0.0649464	-0.325134	0.247688	0.363063	0.923279
851018	IMH1	YLR309C	S000004300	Protein involved in vesicular transport; mediates transport between an endosomal compartment and the Golgi, contains a Golgi-localization (GRIP) domain that interacts with activated Arl1p-GTP to localize Imh1p to the Golgi	0.021678	0.007379	0.0609966	-0.217881	0.487507	0.56653	-0.0137622	0.707355	0.201982	-0.138674	0.336932	0.380198	-0.00802495	0.408215	0.110272	-0.263168	0.259788	0.654716	0.352817	0.53296	-0.591777	-0.549784	0.432112	-0.0866787	0.41965	0.646259	0.753669	0.79321	0.896717	0.449712	-0.307065	-0.110879	-0.0700646	0.684556	0.926938	0.207703	0.634993	0.932581	0.785818	0.640848	-0.595507	-0.447979	0.257198	0.353142	0.850382
854073	IRA2	YOL081W	S000005441	GTPase-activating protein; negatively regulates RAS by converting it from the GTP- to the GDP-bound inactive form, required for reducing cAMP levels under nutrient limiting conditions; IRA2 has a paralog, IRA1, that arose from the whole genome duplication; defects in human homolog NF1 are associated with neurofibromatosis	0.0711519	0.0009373	0.426727	0.326095	0.733783	0.415489	0.0584302	0.689568	0.278115	0.164485	0.433116	0.236193	0.0320189	0.358265	0.147158	-0.528999	0.224511	0.420344	0.197161	0.284053	-0.812986	-0.279964	0.31456	-0.0346616	0.186005	-0.412221	-0.216773	0.0613187	0.543977	-0.0302687	-0.138022	-0.356466	-0.605814	0.718351	0.0117098	-0.620724	0.0379349	0.339965	0.456056	0.188456	-0.668708	-0.408127	-0.12076	0.388414	0.141558
850626	IRC19	YLL033W	S000003956	Protein of unknown function; YLL033W is not an essential gene but mutant is defective in spore formation; null mutant displays increased levels of spontaneous Rad52p foci	0.11643	0.000900132	0.290859	0.00129641	0.228885	0.178055	0.618105	0.547607	0.554747	0.00080357	0.171829	0.125545	0.476991	0.40658	0.401336	-0.878322	-0.639678	-0.754677	-0.409642	-0.215592	-0.069187	0.20337	-0.494344	-0.302569	-0.749298	-0.591073	0.139522	0.361184	0.407439	0.385775	-0.767556	-0.308095	-0.030796	0.129599	0.21192	-0.932605	-0.492025	-0.515924	-0.210627	-0.0545829	-0.310236	0.0698164	-0.42576	-0.211841	-0.560419
851932	IRC3	YDR332W	S000002740	Double-stranded DNA-dependent helicase of the DExH/D-box family; required for maintenance of the mitochondrial (mt) genome; null mutant accumulates double-stranded breaks in mt DNA; localizes to the mt matrix	0.172394	0.000348457	0.392679	-0.0119339	0.763387	0.630429	0.376776	0.86287	0.549575	-0.00485233	0.329544	0.26143	0.173769	0.374358	0.223389	-0.814463	-0.387127	-0.413833	-0.133505	0.278435	-0.324782	0.0655348	-0.386344	-0.447307	-0.381837	0.31071	0.110035	-0.144271	0.524291	0.400186	0.171525	0.332745	-0.85674	0.262995	0.287983	-0.435593	-0.230197	-0.407132	0.219693	0.46033	-0.144414	0.255046	-0.824116	-0.182438	-0.116697
850599	IRC5	YFR038W	S000001934	Putative ATPase containing the DEAD/H helicase-related sequence motif; null mutant displays increased levels of spontaneous Rad52p foci; SWAT-GFP and mCherry fusion proteins localize to the nucleus	0.0257564	0.000699455	0.365337	-0.00267334	0.466363	0.712722	0.223589	0.456248	0.283045	-0.00184783	0.292675	0.423901	0.129588	0.270893	0.148847	0.348505	0.578263	0.808069	0.60471	0.836907	-0.382946	-0.352687	0.319234	-0.0720023	0.821788	0.891006	0.782728	0.474426	0.495017	0.506903	-0.0990758	0.353573	0.0103563	0.119249	0.796638	0.747607	0.790361	0.70372	0.617194	0.738892	-0.252129	0.0555971	0.163444	0.0418028	0.918931
856478	IRE1	YHR079C	S000001121	Serine-threonine kinase and endoribonuclease; transmembrane protein that mediates the unfolded protein response (UPR) by regulating Hac1p synthesis through HAC1 mRNA splicing; role in homeostatic adaptation to ER stress; Kar2p binds inactive Ire1p and releases from it upon ER stress	0.0244042	0.00149212	0.187881	-0.123883	0.541594	0.604093	0.220317	0.799916	0.231213	-0.0649755	0.321589	0.30488	0.109242	0.375291	0.109717	-0.275014	0.488642	0.588115	0.423931	0.480045	-0.893103	-0.170949	0.252803	0.05619	0.468818	0.562477	0.862337	0.656656	0.720745	0.187522	-0.528302	0.209783	-0.030682	0.724155	0.792884	0.207309	0.83956	0.763127	0.710604	0.39681	-0.85466	0.0381262	0.124991	0.502041	0.783136
855105	ISF1	YMR081C	S000004686	Serine-rich, hydrophilic protein; overexpression suppresses growth defects of hap2, hap3, and hap4 mutants; expression is under glucose control; cotranscribed with NAM7 in a cyp1 mutant; ISF1 has a paralog, MBR1, that arose from the whole genome duplication	0.546069	1.1336e-05	0.0143958	0.206331	0.211161	0.500488	0.707215	1.19904	0.401193	0.178339	0.156785	0.393	0.584062	0.966731	0.333875	-0.079141	-0.665046	-0.742822	-0.549886	0.0102	0.762083	0.155377	-0.301043	-0.705757	-0.567873	0.648679	0.553359	0.481984	0.425588	-0.286314	-0.0512718	0.0533005	0.10832	0.824644	0.4904	0.676626	-0.0212268	-0.182291	-0.054784	-0.323417	0.703476	0.217719	-0.175272	0.25412	0.00272633
852547	ISW1	YBR245C	S000000449	ATPase subunit of imitation-switch (ISWI) class chromatin remodelers; with Ioc3p forms Isw1a complex involved in repression of transcription initiation; with Ioc2p and Ioc4p forms Isw1b complex involved in regulation of transcription elongation; Isw1b recruited to ORFs by H3K36 methylation and acts with Chd1p to prevent trans-histone exchange over coding regions; Isw1p import into nucleus depends…	0.154601	0.000697689	0.556787	0.25336	0.49634	0.53366	0.135295	0.488295	0.0959991	0.154474	0.305903	0.371165	0.0827643	0.305801	0.0548106	-0.163131	-0.0165728	0.548277	0.367359	0.679242	-0.142168	-0.756554	0.270914	-0.214565	0.36997	0.0279789	-0.372162	0.215722	0.52897	0.382597	0.498731	-0.760174	-0.379679	0.286503	0.196035	-0.119614	-0.137742	0.505755	0.467615	0.665192	0.0546174	-0.852772	0.0870494	-0.0737005	0.358178
852744	ITC1	YGL133W	S000003101	Subunit of ATP-dependent Isw2p-Itc1p chromatin remodeling complex; required for repression of a-specific genes, repression of early meiotic genes during mitotic growth, and repression of INO1; similar to mammalian Acf1p, the regulatory subunit of the mammalian ATP-utilizing chromatin assembly and modifying factor (ACF) complex; ITC1 has a paralog, YPL216W, that arose from the whole genome duplica…	0.0228447	0.000362448	0.156831	0.129361	0.794009	0.599305	0.0561362	0.585185	0.201095	0.0711121	0.523469	0.378906	0.0360908	0.334344	0.104724	-0.467104	0.148914	0.426733	0.493401	0.633909	-0.655467	-0.384159	-0.0515854	-0.0098009	0.33863	-0.103156	-0.0180422	0.0677902	0.743863	0.519685	-0.0803339	-0.113772	-0.84997	0.421235	0.311087	-0.378377	0.0968646	0.333333	0.695918	0.690658	-0.500902	-0.324688	-0.433062	0.189616	0.384564
853277	JJJ2	YJL162C	S000003698	Protein of unknown function; contains a J-domain, which is a region with homology to the E. coli DnaJ protein	0.405969	8.92706e-05	0.177615	-0.0575372	0.717905	0.782404	0.418125	0.550567	0.55901	-0.0298077	0.396306	0.420118	0.24857	0.321891	0.304039	-0.958622	-0.592634	-0.472977	-0.256243	0.0318757	-0.208993	-0.115065	-0.310441	-0.356	-0.575018	0.303443	-0.0418922	-0.533819	-0.0700784	0.223345	0.356433	0.663203	-0.62755	-0.311988	-0.0722382	-0.612913	-0.52536	-0.738613	-0.260317	0.16935	0.0516209	0.326419	-0.661675	-0.498628	-0.529905
853910	KAE1	YKR038C	S000001746	Highly conserved ATPase of HSP70/DnaK family; essential functional component of the EKC/KEOPS complex, with Bud32p, Cgi121p, Pcc1p, and Gon7p; EKC/KEOPS complex is required for t6A tRNA modification and telomeric TG1-3 recombination; may have role in transcription	0.0157082	8.74895e-06	0.245183	-0.0122962	0.657154	0.694242	0.617092	0.709425	0.549701	-0.00525044	0.311989	0.362394	0.308116	0.347448	0.247895	-0.873087	-0.626747	-0.219179	-0.0209085	0.221916	-0.080308	-0.49872	-0.267613	-0.248364	-0.385036	-0.224233	-0.374627	0.182351	0.509586	0.641229	0.249637	-0.71852	-0.399931	0.00335247	0.181635	-0.749166	-0.600817	-0.117674	0.133963	0.362758	0.0108135	-0.602103	-0.327328	-0.193307	-0.247637
851061	KAP95	YLR347C	S000004339	Karyopherin beta; forms a complex with Srp1p/Kap60p; interacts with nucleoporins to mediate nuclear import of NLS-containing cargo proteins via the nuclear pore complex; regulates PC biosynthesis; GDP-to-GTP exchange factor for Gsp1p	0.0320179	0.000116296	0.570733	0.246209	0.637941	0.684663	0.20125	0.336736	0.423127	0.130841	0.434069	0.423744	0.1157	0.199787	0.239788	-0.615413	0.0920028	0.388807	0.177452	0.175503	-0.731789	-0.405264	0.297178	0.0489581	0.0922115	-0.649491	0.0751304	-0.00888503	0.131518	0.371956	-0.744525	0.106954	-0.178279	-0.205597	-0.00612419	-0.663366	0.091641	0.275387	0.172164	0.253194	-0.779283	-0.253553	0.151699	-0.035422	0.0639351
855087	KAR5	YMR065W	S000004669	Protein required for nuclear membrane fusion during karyogamy; localizes to the membrane with a soluble portion in the endoplasmic reticulum lumen, may form a complex with Jem1p and Kar2p; similar to zebrafish Brambleberry protein; expression of the gene is regulated by pheromone	0.087712	0.00891931	0.614828	0.570536	0.250382	0.379571	0.156208	0.27715	0.108663	0.299873	0.139839	0.195805	0.0945844	0.156253	0.0543214	0.126819	0.220606	0.019505	0.468455	0.844202	-0.152229	0.252879	-0.566385	-0.251648	0.407804	-0.514127	-0.237326	-0.525914	0.0456842	0.294559	-0.21393	0.405391	-0.763374	-0.236773	-0.254784	-0.245056	-0.0331767	-0.305045	0.258414	0.59267	-0.203091	0.367295	-0.736131	-0.2658	0.0487188
854724	KTR7	YIL085C	S000001347	Putative mannosyltransferase involved in protein glycosylation; member of the KRE2/MNT1 mannosyltransferase family; KTR7 has a paralog, KTR5, that arose from the whole genome duplication	0.0164683	0.00466991	0.216821	-0.0913397	0.607743	0.659299	0.22471	0.340024	-0.000349993	-0.0304939	0.232452	0.24427	0.0867035	0.12807	-0.000125397	-0.833695	-0.302392	-0.053458	0.127147	0.342883	-0.451196	-0.310777	-0.232551	-0.182054	-0.171127	-0.616362	-0.499284	-0.829763	-0.31903	-0.164744	0.0151883	0.481693	-0.709699	-0.2388	-0.639257	-0.882665	-0.420418	-0.343963	-0.0155806	0.210933	-0.350873	-0.0703165	-0.441767	-0.230641	-0.367633
853223	LAA1	YJL207C	S000003743	AP-1 accessory protein; colocalizes with clathrin to the late-Golgi apparatus; involved in TGN-endosome transport; physically interacts with AP-1; similar to the mammalian p200; may interact with ribosomes; YJL207C is a non-essential gene	0.267783	0.000549396	0.383416	0.160711	0.851091	0.546811	0.240317	0.478512	0.238858	0.0941623	0.560116	0.335657	0.155804	0.305789	0.134974	-0.502472	0.164642	0.234384	0.300283	0.611044	-0.710729	-0.106201	-0.0653729	-0.231213	0.220645	0.0596392	-0.228786	-0.443146	0.200041	0.466445	0.349033	0.305149	-0.847578	-0.21341	-0.0228731	-0.409136	0.0410895	0.00631176	0.349221	0.737011	-0.46111	0.0435065	-0.433265	-0.295278	0.181132
856051	LCL1	YPL056C	S000005977	Putative protein of unknown function; deletion mutant is fluconazole resistant and has long chronological lifespan	0.990316	0.00753943	0.704804	0.331172	0.260395	0.13523	0.0696712	0.577807	0.319677	0.315349	0.249862	0.131579	0.0654238	0.568331	0.293253	0.106259	0.0859843	-0.057304	-0.533573	0.195843	-0.00250321	0.185644	0.59804	-0.870765	-0.0743988	-0.146569	-0.0187351	0.425121	0.83367	0.427007	-0.122871	-0.594058	-0.484159	0.627512	0.410603	-0.0325381	0.0996118	0.453982	0.286579	0.819188	-0.158538	-0.483081	0.246584	-0.456692	0.411172
854371	LIP5	YOR196C	S000005722	Protein involved in biosynthesis of the coenzyme lipoic acid; has similarity to E. coli lipoic acid synthase	0.103328	9.05035e-07	0.012775	-0.176884	0.656332	0.683687	0.567841	1.17948	0.764964	-0.0770611	0.321635	0.340981	0.281978	0.549442	0.347604	-0.958625	-0.59791	-0.341578	-0.205427	0.067749	-0.202323	-0.298027	-0.198429	-0.327596	-0.516151	0.338943	0.428887	0.61675	0.967152	0.442215	-0.203561	-0.284952	-0.395904	0.781145	0.736372	-0.709206	-0.300818	0.070047	0.430121	0.353477	-0.328698	-0.474486	-0.450087	0.190588	-0.0214278
854225	LPL1	YOR059C	S000005585	Phospholipase; contains lipase specific GXSXG motif; maintains lipid droplet (LD) morphology; induced by transcription factor Rpn4p; protein abundance increases in response to DNA replication stress	0.0218566	0.000832091	0.140426	-0.0604695	0.278068	0.504438	0.181062	0.950013	0.568884	-0.0323599	0.148408	0.299164	0.103475	0.471135	0.272972	-0.498323	-0.485733	0.128592	0.293379	0.510083	0.116086	-0.786934	-0.198575	-0.138984	-0.0128807	0.362341	0.372751	0.592196	0.970233	0.535837	-0.109156	-0.323016	-0.432745	0.691422	0.740075	0.0521775	0.0659988	0.517154	0.885162	0.648253	-0.0313051	-0.610353	-0.425816	0.471398	0.566799
852049	LRS4	YDR439W	S000002847	Nucleolar protein that forms a complex with Csm1p; and then Mam1p at kinetochores during meiosis I to mediate accurate homolog segregation; required for condensin recruitment to the replication fork barrier site and rDNA repeat segregation	0.87855	2.7696e-05	0.365041	0.339983	0.725806	0.653181	0.148625	0.700472	0.430812	0.203464	0.467018	0.40428	0.0941599	0.418232	0.264098	-0.560942	0.166199	0.38483	0.0895956	0.175302	-0.771169	-0.306077	0.402973	-0.0619713	0.099119	0.0486311	-0.0314156	-0.218765	0.437415	-0.0806377	0.088369	0.253766	-0.846795	0.633929	0.0410343	-0.46306	0.119763	0.127617	0.530333	0.0776278	-0.61455	-0.0197266	-0.499607	0.593196	0.132698
851425	LYS21	YDL131W	S000002289	Homocitrate synthase isozyme; catalyzes the condensation of acetyl-CoA and alpha-ketoglutarate to form homocitrate, which is the first step in the lysine biosynthesis pathway; LYS21 has a paralog, LYS20, that arose from the whole genome duplication	0.160875	4.99189e-05	0.671678	0.226993	0.599969	0.649625	0.465953	0.626955	0.270673	0.13037	0.336648	0.381043	0.248008	0.332239	0.135609	0.0334935	0.278468	0.742496	0.652489	0.808187	-0.318744	-0.643925	0.170823	0.0171529	0.658019	0.81541	0.655797	0.825301	0.719604	0.40669	-0.0141151	-0.277732	0.197023	0.503544	0.887954	0.43409	0.51308	0.901257	0.789146	0.732436	-0.214911	-0.560162	0.210963	0.265764	0.877866
851820	LYS4	YDR234W	S000002642	Homoaconitase; catalyzes the conversion of homocitrate to homoisocitrate, which is a step in the lysine biosynthesis pathway	0.332634	4.19045e-05	0.0214019	-0.20403	0.758306	0.946444	0.596083	0.324386	0.346959	-0.101572	0.384578	0.470769	0.307146	0.180686	0.183522	-0.978165	-0.609689	-0.370386	-0.283462	-0.034874	-0.206963	-0.274278	-0.138371	-0.32368	-0.576034	0.450873	0.0463234	-0.473544	-0.613711	-0.246508	0.392278	0.693921	0.140964	-0.529782	-0.250657	-0.377243	-0.478904	-0.811993	-0.882435	-0.286172	0.228527	0.483632	0.0267998	-0.83003	-0.758261
852723	LYS5	YGL154C	S000003122	Phosphopantetheinyl transferase involved in lysine biosynthesis; converts inactive apo-form of Lys2p (alpha-aminoadipate reductase) into catalytically active holo-form by posttranslational addition of phosphopantetheine	0.0348695	0.000717744	0.0252931	0.117968	-0.13651	0.444111	0.169776	0.864843	0.820692	0.075611	-0.0820769	0.294376	0.111198	0.541581	0.429993	-0.0554583	-0.568961	-0.198928	-0.126612	0.432995	0.664227	-0.452796	-0.106736	-0.593149	-0.167851	0.324149	0.489291	0.605329	0.92179	0.870865	-0.294761	-0.193224	-0.353848	0.295117	0.827491	0.23647	0.111461	0.393352	0.688188	0.92973	0.0954827	-0.386749	-0.34276	-0.0592337	0.590371
853659	MCH2	YKL221W	S000001704	Protein with similarity to mammalian monocarboxylate permeases; monocarboxylate permeases are involved in transport of monocarboxylic acids across the plasma membrane but mutant is not deficient in monocarboxylate transport	0.172997	0.0092937	0.95933	0.241669	0.353613	0.524223	0.196929	0.528978	0.286183	0.317219	0.407954	0.566825	0.197446	0.593044	0.223736	0.401622	0.49451	0.623458	0.469611	0.892353	-0.223889	-0.210946	0.242441	-0.298337	0.731021	0.656548	0.713712	0.599009	0.670381	0.83447	-0.246235	0.0991282	-0.0443181	0.0135019	0.882785	0.543698	0.622325	0.634899	0.58731	0.897338	-0.243488	-0.0646207	0.108911	-0.154443	0.83423
852895	MCY1	YGR012W	S000003244	Putative cysteine synthase; localized to the mitochondrial outer membrane	0.0258217	0.000266432	0.189852	-0.00730047	0.31979	0.562699	0.484004	0.834774	0.217989	-0.00418878	0.163603	0.329255	0.2656	0.430808	0.104753	-0.0149219	-0.254331	0.233777	0.432832	0.77246	0.306784	-0.635351	-0.233849	-0.224966	0.283022	0.761036	0.496474	0.686905	0.779774	0.378497	0.13304	-0.293584	-0.0647655	0.607848	0.802049	0.473174	0.162875	0.57447	0.751956	0.700229	0.267151	-0.564709	-0.180426	0.250929	0.676763
852433	MEC1	YBR136W	S000000340	Genome integrity checkpoint protein and PI kinase superfamily member; Mec1p and Dun1p function in same pathway to regulate dNTP pools and telomere length; signal transducer required for cell cycle arrest and transcriptional responses to damaged or unreplicated DNA; facilitates replication fork progression and regulates P-body formation under replication stress; promotes interhomolog recombination…	0.858939	0.00121757	0.244672	0.0834208	0.614118	0.598274	0.550656	0.749035	0.734557	0.0507281	0.423222	0.382811	0.368704	0.472794	0.442459	-0.896332	-0.300078	-0.230686	-0.0252888	0.13749	-0.51676	-0.0700747	-0.277509	-0.169478	-0.32294	0.430778	0.678457	0.599414	0.907862	0.733893	-0.42741	0.0539898	-0.344166	0.414472	0.867508	-0.416606	0.210374	0.212705	0.574802	0.587766	-0.682711	-0.0192688	-0.4417	0.139307	0.316353
855139	MED11	YMR112C	S000004718	Subunit of the RNA polymerase II mediator complex; associates with core polymerase subunits to form the RNA polymerase II holoenzyme; essential protein	0.0376385	0.000208676	0.0290475	0.399808	0.0911008	0.15948	0.139962	0.742147	1.09703	0.168491	0.034024	0.0637212	0.059	0.309957	0.41805	0.293191	-0.423097	-0.611342	-0.605302	-0.2239	0.828371	0.285021	-0.0545484	-0.541753	-0.447728	0.310769	0.132552	0.279764	0.713584	0.87228	0.143102	-0.207676	-0.527278	0.0303405	0.573625	0.432472	-0.175024	-0.184698	0.154563	0.527348	0.653862	0.0264079	-0.443307	-0.331839	0.149728
851559	MED2	YDL005C	S000002163	Subunit of the RNA polymerase II mediator complex; associates with core polymerase subunits to form the RNA polymerase II holoenzyme; essential for transcriptional regulation; relocalizes to the cytosol in response to hypoxia	0.113006	0.000114966	0.0130979	-0.152323	0.297772	0.594343	0.174277	1.11406	0.409493	-0.0721448	0.155437	0.299458	0.0805628	0.521943	0.189782	-0.623876	-0.20647	0.135516	-0.213261	0.213466	-0.36271	-0.442981	0.451571	-0.483223	-0.16574	0.430686	0.759528	0.768171	0.815813	0.20273	-0.53005	-0.0698743	-0.00132016	0.8292	0.797956	-0.130572	0.512965	0.805147	0.558054	0.360263	-0.779428	-0.431363	0.374329	0.345626	0.581475
856455	MED6	YHR058C	S000001100	Subunit of the RNA polymerase II mediator complex; associates with core polymerase subunits to form the RNA polymerase II holoenzyme; essential for transcriptional regulation; protein abundance increases in response to DNA replication stress	0.0166396	0.000256001	0.312582	-0.100533	0.497061	0.642265	0.497191	0.504141	0.330469	-0.0625895	0.29755	0.369004	0.28786	0.261604	0.163593	0.0265975	0.381628	0.645486	0.905492	0.807587	-0.456128	-0.383285	-0.279357	0.33778	0.726292	0.838856	0.804418	0.671507	0.746978	0.507743	-0.17866	0.116596	-0.0439395	0.437118	0.918675	0.557249	0.710137	0.754153	0.931434	0.727934	-0.341011	-0.113542	-0.166379	0.450248	0.95436
854533	MEK1	YOR351C	S000005878	Meiosis-specific serine/threonine protein kinase; functions in meiotic checkpoint, promotes recombination between homologous chromosomes by suppressing double strand break repair between sister chromatids; stabilizes Hop1-Thr318 phosphorylation to promote interhomolog recombination and checkpoint responses during meiosis	0.946366	0.000917742	0.721137	0.566135	0.539056	0.350557	0.188986	0.470467	0.0983504	0.573695	0.563989	0.337296	0.219236	0.545533	0.098828	0.134228	0.304553	-0.0735718	0.0502626	0.686168	-0.251004	0.483939	-0.162285	-0.622591	0.255424	-0.525307	-0.676084	-0.92138	-0.393063	-0.26295	0.32988	0.380975	-0.738972	-0.234239	-0.736877	-0.284296	-0.281092	-0.697483	-0.245011	0.255974	0.0712602	0.580215	-0.625854	-0.565891	-0.3556
856084	MET12	YPL023C	S000005944	Protein with MTHFR activity in vitro; null mutant has no phenotype and is prototrophic for methionine; MET13 encodes major isozyme of methylenetetrahydrofolate reductase (MTHFR)	0.0185325	8.82386e-05	0.226648	0.117964	0.442807	0.638062	0.277756	0.969981	0.359757	0.0646665	0.259977	0.384133	0.147251	0.497325	0.173297	-0.238419	0.107526	0.589074	0.419337	0.693352	-0.37443	-0.654315	0.259902	-0.162927	0.417166	0.393545	0.630482	0.836841	0.957569	0.473752	-0.403959	-0.325236	-0.0884998	0.737488	0.872605	0.101057	0.450602	0.861348	0.835376	0.699877	-0.468914	-0.585648	0.0989435	0.3568	0.781919
852514	MET8	YBR213W	S000000417	Bifunctional dehydrogenase and ferrochelatase; involved in the biosynthesis of siroheme, a prosthetic group used by sulfite reductase; required for sulfate assimilation and methionine biosynthesis	0.0638121	0.00586891	0.212119	-0.0457798	0.0736684	0.216801	0.215421	0.721688	0.630915	-0.0291032	0.0555573	0.178409	0.164022	0.493675	0.428961	-0.93958	-0.761025	-0.357893	-0.245775	-0.0966796	0.0230492	-0.482465	-0.16928	-0.214204	-0.608814	-0.143721	0.201853	0.605473	0.87885	0.521568	-0.399048	-0.557	-0.299341	0.590099	0.55802	-0.643701	-0.29973	0.214599	0.469853	0.307296	-0.26457	-0.667046	-0.306407	0.287026	0.0363769
850313	MGR1	YCL044C	S000000549	Subunit of the mitochondrial (mt) i-AAA protease supercomplex; i-AAA degrades misfolded mitochondrial proteins; forms a subcomplex with Mgr3p that binds to substrates to facilitate proteolysis; required for growth of cells lacking mtDNA	0.0110008	1.16459e-06	0.109562	0.285493	0.583492	0.565934	0.283467	1.13869	0.764275	0.210841	0.424017	0.413497	0.198248	0.705835	0.446188	0.0956932	0.420903	0.72889	0.56972	0.848074	-0.436712	-0.445504	0.257263	-0.127429	0.692782	0.468959	0.537334	0.684062	0.981102	0.573309	-0.210721	-0.238085	-0.323242	0.667698	0.846843	0.406379	0.570104	0.790579	0.974211	0.742195	-0.314752	-0.339541	-0.171617	0.490094	0.908369
852848	MIG1	YGL035C	S000003003	Transcription factor involved in glucose repression; sequence specific DNA binding protein containing two Cys2His2 zinc finger motifs; regulated by the SNF1 kinase and the GLC7 phosphatase; regulates filamentous growth along with Mig2p in response to glucose depletion; activated in stochastic pulses of nuclear localization, shuttling between cytosol and nucleus depending on external glucose level…	0.0269911	9.9606e-06	0.239562	0.366318	0.489873	0.761327	0.291166	0.985757	0.293699	0.190261	0.30964	0.491985	0.181005	0.565461	0.167252	-0.760702	-0.389781	0.0718807	0.0936492	0.371243	-0.267664	-0.589476	-0.0220198	-0.252785	-0.145682	-0.515617	-0.0975366	0.0447357	0.469346	-0.0810666	-0.392242	-0.183394	-0.533662	0.674748	-0.0144805	-0.786406	-0.308026	0.0720391	0.327982	0.194292	-0.396781	-0.486276	-0.318218	0.220576	-0.10261
855052	MIH1	YMR036C	S000004639	Protein tyrosine phosphatase involved in cell cycle control; regulates the phosphorylation state of Cdc28p; homolog of S. pombe cdc25	0.687162	1.28268e-06	0.498958	0.231514	0.861887	0.56412	0.390132	0.874036	0.688282	0.140288	0.500204	0.311897	0.235594	0.513962	0.422056	-0.412602	-0.089321	-0.591711	-0.750212	-0.50675	-0.299619	0.68088	0.155088	-0.442202	-0.605587	0.681171	0.165086	-0.118674	0.225515	-0.121185	0.472353	0.368036	-0.444474	0.406441	0.195271	0.387783	0.10108	-0.508793	-0.279616	-0.454742	0.259926	0.810474	-0.328928	0.101052	-0.212852
855963	MKK2	YPL140C	S000006061	MAPKK involved in the protein kinase C signaling pathway; involved in control of cell integrity; upon activation by Bck1p phosphorylates downstream target, Slt2p; functionally redundant with Mkk1p; MKK2 has a paralog, MKK1, that arose from the whole genome duplication	0.298036	0.00888969	0.619338	0.180035	0.593178	0.256445	0.12754	0.444685	0.149167	0.115098	0.349411	0.159236	0.0775108	0.264893	0.0810025	0.314944	0.505803	0.644413	0.589877	0.944197	-0.324852	-0.224774	0.118428	-0.198054	0.765868	0.614001	0.0480737	0.277708	0.576564	0.479952	0.553192	-0.311775	-0.356718	0.24935	0.492441	0.566564	0.325651	0.549717	0.703981	0.850951	0.154644	-0.325603	-0.15295	0.0395222	0.754473
855203	MLH1	YMR167W	S000004777	Protein required for mismatch repair in mitosis and meiosis; also required for crossing over during meiosis; forms a complex with Pms1p and Msh2p-Msh3p during mismatch repair; human homolog is associated with hereditary non-polyposis colon cancer	0.0423841	0.00224032	0.0619052	0.0150127	0.575697	0.643975	-0.14448	0.716632	0.254323	0.00834767	0.419869	0.442851	-0.0974241	0.457224	0.159402	-0.782938	-0.189562	0.127446	-0.039064	0.166948	-0.543159	-0.410765	0.220399	-0.216361	-0.160214	-0.446036	-0.115796	-0.155714	0.459244	0.0507828	-0.299564	0.0624407	-0.789815	0.53012	-0.0370389	-0.836391	-0.206454	0.0205757	0.201995	0.155909	-0.575245	-0.288751	-0.2279	0.0995966	-0.1437
856695	MMS21	YEL019C	S000000745	Highly conserved SUMO E3 ligase subunit of SMC5-SMC6 complex; required for anchoring dsDNA breaks to the nuclear periphery; SMC5-SMC6 plays a key role in removal of X-shaped DNA structures that arise between sister chromatids during DNA replication and repair; required for efficient sister chromatid cohesion; mutants are sensitive to MMS, show increased spontaneous mutation and mitotic recombinat…	0.0231372	0.00358375	0.275685	0.0471996	0.766927	0.347041	0.180644	0.327581	0.127438	0.038722	0.765177	0.371007	0.197811	0.390887	0.146893	-0.964652	-0.525871	-0.401115	-0.396715	-0.115997	-0.299472	-0.127028	-0.0363441	-0.385811	-0.60791	-0.509808	-0.944781	-0.863895	-0.681192	-0.499973	0.685256	-0.0360281	-0.297389	-0.361675	-0.922086	-0.888013	-0.862132	-0.73881	-0.632504	-0.35546	0.202507	-0.0993027	-0.191155	-0.444602	-0.900208
852395	MMS4	YBR098W	S000000302	Subunit of structure-specific Mms4p-Mus81p endonuclease; cleaves branched DNA; involved in recombination, DNA repair, and joint molecule formation/resolution during meiotic recombination; phosphorylation of the non-catalytic subunit Mms4p by Cdc28p and Cdc5p during mitotic cell cycle activates the function of Mms4p-Mus81p	0.0140844	0.000494739	0.310422	-0.00360578	0.338448	0.614352	0.602412	0.734872	0.417968	-0.00239991	0.185968	0.398393	0.340331	0.389588	0.215738	0.271105	-0.0562626	0.523007	0.610706	0.619339	0.342272	-0.772854	-0.0708022	0.15315	0.500472	0.829544	0.599696	0.780291	0.694696	0.371017	0.0709819	-0.288309	0.168141	0.507713	0.847716	0.665	0.369002	0.744235	0.726859	0.518066	0.198246	-0.531741	0.0790838	0.401346	0.778542
856611	MNL1	YHR204W	S000001247	Alpha-1,2-specific exomannosidase of the endoplasmic reticulum; involved in glycan trimming of both folded and misfolded glycoproteins; complexes with Pdi1p, and trims a mannose from Man8GlcNac2 glycans to generate Man7GlcNac2, an oligosaccharide signal on glycoproteins destined for ER-associated protein degradation; requires Pdi1p for stability and substrate recognition; human homolog EDEM1 can …	0.020279	0.00648411	0.211842	0.00382661	0.713586	0.466482	0.0365729	0.400673	0.130397	0.00197801	0.305921	0.242898	0.0175438	0.194484	0.061477	0.167284	-0.219099	0.39997	0.139043	0.376648	0.444424	-0.813756	0.360738	-0.200771	0.213697	0.541717	-0.290745	-0.120225	0.0169445	-0.0288478	0.909484	-0.206468	-0.182732	0.0502811	0.00114281	0.463635	-0.303621	0.0822745	0.0711895	0.138647	0.847689	-0.494437	0.0203344	-0.0485984	0.091359
850508	MOB2	YFL034C-B	S000001859	Activator of Cbk1p kinase; component of the RAM signaling network that regulates cellular polarity and morphogenesis; activation of Cbk1p facilitates the Ace2p-dependent daughter cell-specific transcription of genes involved in cell separation; similar to Mob1p	0.206646	0.000847704	0.419174	0.148363	0.411013	0.392271	0.0413521	0.746419	0.443044	0.0803736	0.231389	0.240501	0.0234237	0.400655	0.23255	-0.522077	-0.280762	0.312717	0.070847	0.35021	-0.166938	-0.774694	0.329939	-0.260595	-0.00389244	0.100246	0.0933468	0.478169	0.897357	0.449556	-0.0178292	-0.523455	-0.493546	0.685521	0.53343	-0.221497	-0.0896971	0.534177	0.709626	0.534109	-0.108038	-0.830132	-0.18094	0.363504	0.395725
855092	MOT3	YMR070W	S000004674	Transcriptional repressor, activator; role in cellular adjustment to osmotic stress including modulation of mating efficiency; involved in repression of subset of hypoxic genes by Rox1p, repression of several DAN/TIR genes during aerobic growth, ergosterol biosynthetic genes in response to hyperosmotic stress; contributes to recruitment of Tup1p-Cyc8p general repressor to promoters; relocalizes t…	0.490129	5.64801e-08	0.140385	0.530358	1.15193	0.832504	0.336812	1.10624	0.603987	0.278352	0.66543	0.486083	0.199369	0.658743	0.358234	-0.799156	-0.308578	-0.178284	-0.422919	-0.00214524	-0.408832	-0.151131	0.295762	-0.53281	-0.428967	-0.302363	-0.669874	-0.643592	-0.0879646	-0.401559	0.544968	0.0161384	-0.752202	0.290292	-0.551216	-0.950837	-0.808395	-0.671731	-0.445714	-0.322245	0.0717108	-0.121326	-0.337433	-0.241544	-0.820639
851533	MPS1	YDL028C	S000002186	Dual-specificity kinase; autophosphorylation required for function; required for spindle pole body (SPB) duplication and spindle checkpoint function; contributes to bi-orientation by promoting formation of force-generating kinetochore-microtubule attachments in meiosis I; substrates include SPB proteins Spc42p, Spc110p, and Spc98p, mitotic exit network protein Mob1p, kinetochore protein Cnn1p, an…	0.1561	0.00955039	0.0305561	-0.333937	0.857193	0.456947	0.0873157	0.371338	0.107064	-0.210475	0.480784	0.276886	0.0539659	0.227615	0.057642	-0.374954	-0.00318668	0.28797	0.349794	0.799326	-0.370924	-0.390383	-0.0561055	-0.356869	0.272587	0.710163	-0.0120386	-0.0662919	0.172645	0.260439	0.725391	0.0737122	-0.30732	-0.042059	0.236726	0.462636	-0.0136669	0.111212	0.381598	0.741453	0.479923	-0.166494	-0.333482	-0.258765	0.396872
851480	MRK1	YDL079C	S000002237	Glycogen synthase kinase 3 (GSK-3) homolog; one of four GSK-3 homologs in S. cerevisiae that function to activate Msn2p-dependent transcription of stress responsive genes and that function in protein degradation; MRK1 has a paralog, RIM11, that arose from the whole genome duplication	0.0315129	0.00228623	0.0315129	0.0480156	-0.180572	0.384606	0.230672	1.1504	0.537634	0.0266735	-0.0968689	0.209092	0.133918	0.567639	0.252047	-0.0187874	-0.443144	-0.230731	0.142133	0.6319	0.541751	-0.25098	-0.489344	-0.452115	-0.0168461	0.360621	0.58981	0.623446	0.964013	0.502193	-0.385436	-0.090383	-0.382951	0.717198	0.799704	0.320053	0.348213	0.469069	0.937301	0.725324	-0.120406	-0.188863	-0.556281	0.460279	0.720285
855917	MRN1	YPL184C	S000006105	RNA-binding protein that may be involved in translational regulation; binds specific categories of mRNAs, including those that contain upstream open reading frames (uORFs) and internal ribosome entry sites (IRES); interacts genetically with chromatin remodelers and splicing factors, linking chromatin state, splicing and as a result mRNA maturation	0.106822	0.000284748	0.606106	0.0968678	0.496649	0.572612	0.473695	0.582998	0.212283	0.0505126	0.288717	0.328398	0.257696	0.324987	0.104565	-0.502491	-0.0645642	0.255042	0.326911	0.706848	-0.420823	-0.423842	-0.0713394	-0.293335	0.191678	0.23721	0.667152	0.815292	0.747239	0.822178	-0.606678	-0.249941	0.148638	0.123013	0.86028	-0.313234	0.157789	0.450027	0.484213	0.800149	-0.512822	-0.404186	-0.00871192	-0.187663	0.415217
854839	MRS1	YIR021W	S000001460	Splicing protein; required for splicing of two mitochondrial group I introns (BI3 in COB and AI5beta in COX1); forms a splicing complex, containing four subunits of Mrs1p and two subunits of the BI3-encoded maturase, that binds to the BI3 RNA; MRS1 has a paralog, CCE1, that arose from the whole genome duplication	0.0289537	0.00268735	0.249963	0.241635	0.212098	0.435539	0.328335	0.642095	-0.0292147	0.107533	0.0989933	0.203897	0.14751	0.301294	-0.0115476	-0.072066	0.0535031	0.290277	0.340184	0.914255	-0.139743	-0.321771	-0.0408557	-0.483952	0.377433	0.0577296	0.534844	0.697479	0.74792	0.859638	-0.6188	-0.259237	-0.0102862	0.086415	0.758463	-0.0329785	0.21659	0.442096	0.495003	0.947779	-0.306946	-0.319167	-0.033	-0.321645	0.525477
853308	MRS3	YJL133W	S000003669	Iron transporter, mediates Fe2+ transport across inner mito membrane; mitochondrial carrier family member; active under low-iron conditions; may transport other cations; MRS3 has a paralog, MRS4, that arose from the whole genome duplication	0.785746	5.02207e-06	0.658015	0.428491	0.655367	0.56368	0.607041	0.792335	0.289307	0.214253	0.339556	0.303707	0.307078	0.412657	0.154257	-0.743339	-0.439733	-0.0604424	-0.23485	0.236123	-0.187115	-0.475131	0.215972	-0.533187	-0.314582	-0.142086	-0.285	0.00721086	-0.288223	-0.810204	0.218413	-0.370174	0.374251	0.445628	-0.36392	-0.614613	-0.524725	-0.0349282	-0.389312	-0.490674	0.0491177	-0.61687	0.445584	-0.00177067	-0.503718
853294	MRX5	YJL147C	S000003683	Protein that associates with mitochondrial ribosome; homozygous diploid deletion strain has a sporulation defect characterized by elevated dityrosine in the soluble fraction; expression induced by calcium shortage; YJL147W is a non-essential gene	0.229357	0.00267227	0.466877	0.0298199	0.430917	0.302234	0.38137	0.632477	0.169818	0.018499	0.257571	0.191398	0.25607	0.402593	0.097555	-0.378216	-0.377306	-0.284035	0.1216	0.685166	0.0990426	-0.0961857	-0.534887	-0.531352	-0.0867566	0.548159	0.0192735	0.177364	0.608756	0.384662	0.52378	-0.213579	-0.532064	0.38536	0.428838	0.0139316	-0.272694	-0.116815	0.421957	0.723171	0.358865	-0.18821	-0.690462	-0.189433	0.167849
855421	MRX6	YNL295W	S000005239	Protein that associates with mitochondrial ribosome	0.0518146	0.0031384	0.105553	-0.249507	0.284191	0.553905	0.33241	0.832113	0.424601	-0.152033	0.200981	0.358735	0.19973	0.475767	0.238244	-0.666416	-0.0539441	0.298261	0.220652	0.389626	-0.598181	-0.468393	0.121053	-0.11052	0.0729372	0.487063	0.846815	0.833312	0.850126	0.397257	-0.584083	-0.0468599	0.0426722	0.678076	0.905343	-0.0159306	0.609246	0.802109	0.770075	0.525049	-0.786572	-0.3055	0.102065	0.449028	0.726661
854360	MSB1	YOR188W	S000005714	Protein of unknown function; may be involved in positive regulation of 1,3-beta-glucan synthesis and the Pkc1p-MAPK pathway; multicopy suppressor of temperature-sensitive mutations in CDC24 and CDC42, and of mutations in BEM4; potential Cdc28p substrate; relocalizes from bud neck to cytoplasm upon DNA replication stress	0.122936	0.00106964	0.213957	0.153505	0.795355	0.447664	0.0159902	0.430104	0.263316	0.110255	0.486222	0.305118	0.0116641	0.327772	0.185128	-0.149735	-0.420556	-0.400508	-0.674518	0.106173	0.38223	0.00537243	0.315867	-0.959378	-0.429032	0.281233	-0.494528	-0.591199	-0.26854	-0.109731	0.906767	0.167643	-0.453498	-0.229948	-0.346287	0.190795	-0.557201	-0.632972	-0.44721	-0.0589641	0.895605	0.144411	-0.28354	-0.506717	-0.433791
855423	MSB3	YNL293W	S000005237	Rab GTPase-activating protein; regulates endocytosis via inactivation of Vps21p at endosomes and vacuole fusion via inactivation of Ypt7p at vacuoles; also acts on Ypt52p and Sec4p; localizes to plasma membrane, sites of polarized growth; relocalizes from bud neck to cytoplasm upon DNA replication stress; similar to TBC-domain Tre2 oncogene; MSB3 has a paralog, MSB4, that arose from the whole gen…	0.022412	0.00854555	0.264565	-0.192872	0.267502	0.404671	0.0998202	0.592483	0.385386	-0.0822785	0.13144	0.196437	0.0487193	0.262653	0.172406	-0.924421	-0.444074	-0.10551	0.0212032	0.0791617	-0.362706	-0.420159	-0.168376	-0.0523416	-0.332064	-0.0749578	0.27501	0.389233	0.867854	0.388544	-0.422821	-0.174347	-0.575547	0.709215	0.497846	-0.664096	-0.146889	0.144355	0.494585	0.268352	-0.478294	-0.379474	-0.431934	0.357254	0.0518775
850454	MSH3	YCR092C	S000000688	Mismatch repair protein; forms dimers with Msh2p that mediate repair of insertion or deletion mutations and removal of nonhomologous DNA ends, contains a PCNA (Pol30p) binding motif required for genome stability	0.0109142	0.000656083	0.0686299	-0.047669	0.813108	0.718219	0.127143	0.4689	0.091094	-0.0234707	0.478678	0.457635	0.0758325	0.281442	0.0496765	-0.785055	-0.335	0.0906559	0.0863404	0.328096	-0.36131	-0.545373	0.0124147	-0.218883	-0.141812	-0.607391	-0.89569	-0.694258	-0.191429	-0.0511559	0.525578	-0.201524	-0.689304	-0.190985	-0.647038	-0.859254	-0.588179	-0.166803	0.00463125	0.252959	-0.11526	-0.520205	-0.229647	-0.247101	-0.342214
851789	MSS4	YDR208W	S000002616	Phosphatidylinositol-4-phosphate 5-kinase; involved in actin cytoskeleton organization and cell morphogenesis; multicopy suppressor of stt4 mutation	0.384365	1.76007e-05	0.189315	0.336148	0.867122	0.74987	0.0930641	0.672183	0.310462	0.180072	0.517834	0.425098	0.0571582	0.404036	0.177054	-0.71011	-0.0831355	0.0330888	-0.0752044	0.328882	-0.604951	-0.149552	0.13952	-0.424009	-0.117209	-0.27978	-0.463163	-0.781677	-0.127207	-0.159862	0.30608	0.46287	-0.887825	-0.00104384	-0.487747	-0.776707	-0.432211	-0.593952	-0.159628	0.130223	-0.229999	0.250162	-0.594955	-0.332139	-0.478329
851718	MTQ2	YDR140W	S000002547	S-adenosylmethionine-dependent methyltransferase; subunit of complex with Trm112p that methylates translation release factor Sup45p (eRF1) in the ternary complex eRF1-eRF3-GTP; similar to E.coli PrmC; member of the seven beta-strand family	0.0381847	5.5623e-05	0.0654935	-0.0396775	0.364796	0.574251	0.276709	1.06482	0.48179	-0.0180921	0.19319	0.312043	0.152308	0.571897	0.251844	-0.920587	-0.721515	-0.492443	-0.44616	-0.0367783	-0.00793449	-0.251972	-0.0963287	-0.527574	-0.675396	-0.390708	-0.0990994	0.0168421	0.558233	0.00769663	-0.265357	-0.147948	-0.683518	0.698418	0.0480836	-0.966025	-0.664837	-0.416116	-0.135063	-0.0282088	-0.125066	-0.282681	-0.387435	-0.142634	-0.559579
853649	MTR2	YKL186C	S000001669	mRNA transport regulator; essential nuclear protein; Mex67p and Mtr2p form a mRNA export complex which binds to RNA	0.0203073	0.00438852	0.63306	0.112828	0.28552	0.664063	0.240719	0.192829	0.29285	0.0436636	0.132012	0.299792	0.100039	0.0821988	0.123047	-0.738555	-0.225642	0.259213	0.125698	0.0798	-0.453138	-0.633187	0.188774	0.0791972	-0.0954492	-0.704902	0.0735481	0.0732657	-0.0417367	0.118803	-0.797934	-0.00526444	0.15109	-0.171596	-0.0976665	-0.770891	-0.121069	0.201578	0.0671408	0.100186	-0.61775	-0.423586	0.185518	-0.0152584	-0.10223
855104	NAM7	YMR080C	S000004685	ATP-dependent RNA helicase of the SFI superfamily; involved in nonsense mediated mRNA decay; required for efficient translation termination at nonsense codons and targeting of NMD substrates to P-bodies; binds to the small ribosomal subunit via an interaction with Rps26; forms cytoplasmic foci upon DNA replication stress	0.294053	0.00065689	0.385431	0.20623	0.665438	0.562772	0.0530164	0.493897	0.192134	0.115105	0.400122	0.317724	0.0300159	0.270921	0.0990571	-0.16577	0.465978	0.65593	0.494442	0.671432	-0.755191	-0.290601	0.254597	-0.0460073	0.567482	0.32479	0.335597	0.102809	0.716657	0.474017	-0.0997107	0.286568	-0.768575	0.432491	0.494863	0.0226094	0.563604	0.607707	0.77914	0.807306	-0.6903	-0.102415	-0.170218	0.178237	0.729653
853369	NET1	YJL076W	S000003612	Core subunit of the RENT complex; involved in nucleolar silencing and telophase exit; stimulates transcription by RNA polymerase I and regulates nucleolar structure; NET1 has a paralog, TOF2, that arose from the whole genome duplication	0.318438	0.00302239	0.440015	0.0722535	0.622745	0.55447	0.0654407	0.277543	0.283949	0.0436291	0.442459	0.353959	0.0427068	0.179168	0.172158	-0.573199	0.199627	0.366857	0.249303	0.317682	-0.825709	-0.239681	0.176845	-0.00233661	0.175563	-0.0555738	0.143985	-0.302586	0.258066	0.483279	-0.237702	0.58809	-0.732393	-0.156848	0.115722	-0.514484	0.234816	0.178319	0.328183	0.487139	-0.811506	0.0577824	-0.175883	-0.0720171	0.201642
854327	NFI1	YOR156C	S000005682	SUMO E3 ligase; catalyzes sumoylation of Yku70p/80p and Sir4p promoting telomere anchoring to the nuclear envelope and regulating telomerase activity; DNA-bound form catalyzes a DNA-damaged triggered sumoylation wave resulting in multisite modification of several DNA repair proteins, enhancing interactions between these proteins and accelerating repair; sumoylates Cse4p, a prerequisite for STUbL-…	0.0111423	0.00310152	0.116702	-0.00324705	0.458558	0.417445	0.120698	0.729241	0.0794126	-0.00211097	0.370185	0.366393	0.0912004	0.533327	0.0550306	-0.701332	-0.263404	0.177166	0.113918	0.40936	-0.368149	-0.570876	0.0935974	-0.265263	-0.0531064	-0.340785	-0.125483	0.353316	0.639393	0.0794021	-0.18206	-0.632749	-0.334752	0.729373	0.188255	-0.668775	-0.250067	0.2872	0.367086	0.33747	-0.352463	-0.701631	-0.0790122	0.126861	0.0440872
850552	NIC96	YFR002W	S000001898	Linker nucleoporin component of the nuclear pore complex (NPC); also part of the NPC nuclear basket; contributes to nucleocytoplasmic transport and NPC biogenesis; forms stable associations with three FG-nucleoporins (Nsp1p, Nup57p, and Nup49p)	0.069881	0.0012971	0.184113	-0.0293643	0.477037	0.612812	0.181545	0.735227	0.205724	-0.0155819	0.307805	0.348276	0.0988502	0.407213	0.109533	-0.590156	0.0880286	0.290208	0.0849068	0.36759	-0.701504	-0.278006	0.281955	-0.260191	0.0841312	0.174585	0.778829	0.53638	0.622202	0.140776	-0.810563	0.26552	-0.0674018	0.646254	0.612575	-0.376052	0.443597	0.484496	0.365755	0.354363	-0.937162	-0.0889089	0.187372	0.108285	0.360515
852813	NPY1	YGL067W	S000003035	NADH diphosphatase (pyrophosphatase); hydrolyzes the pyrophosphate linkage in NADH and related nucleotides; localizes to peroxisomes; nudix hydrolase family member	0.056026	0.000120562	0.492391	0.316957	0.490932	0.34492	0.395435	0.882205	0.306418	0.144547	0.245264	0.186957	0.198535	0.431588	0.140583	-0.615643	-0.354885	0.0440529	0.124928	0.585393	-0.166745	-0.508001	-0.0989201	-0.42737	-0.0571775	-0.334561	-0.187466	0.423715	0.645749	0.277418	-0.0974337	-0.805601	-0.248341	0.539396	0.23808	-0.556068	-0.317531	0.263178	0.435737	0.506001	-0.15442	-0.754738	-0.198078	0.045167	0.098753
855470	NRD1	YNL251C	S000005195	RNA-binding subunit of Nrd1 complex; complex interacts with exosome to mediate 3'-end formation of some mRNAs, snRNAs, snoRNAs, and CUTs; interacts with CTD of RNA pol II large subunit Rpo21p at phosphorylated Ser5 to direct transcription termination of non-polyadenylated transcripts; H3K4 trimethylation of transcribed regions by Set1p enhances recruitment of Nrd1p to those sites; role in regulat…	0.0302121	0.00142494	0.858896	0.337676	0.32841	0.324255	0.409464	0.503479	0.0737317	0.224009	0.235691	0.248466	0.278525	0.328704	0.0427479	-0.0439345	0.179823	0.556037	0.691559	0.915056	-0.271395	-0.518542	-0.128758	-0.0402954	0.593409	-0.0836198	0.234956	0.770321	0.785078	0.571161	-0.380819	-0.736295	0.0404408	0.421893	0.613473	-0.0632888	0.212137	0.675103	0.764024	0.806522	-0.331623	-0.637412	-0.0606769	0.159901	0.629283
854985	NSE5	YML023C	S000004485	Component of the SMC5-SMC6 complex; this complex plays a key role in the removal of X-shaped DNA structures that arise between sister chromatids during DNA replication and repair	0.224571	0.000507595	0.218259	0.0460882	0.454352	0.79149	0.324502	0.474685	0.145142	0.0188767	0.191889	0.319618	0.136539	0.208378	0.0564312	-0.430004	-0.137619	0.0649751	0.137788	0.742343	-0.255928	-0.261249	-0.087117	-0.568053	0.0872276	0.379823	0.372216	-0.282879	-0.106605	0.289937	-0.0909972	0.850343	-0.244677	-0.424783	0.136651	-0.0947184	0.119205	-0.120192	0.0393608	0.727607	-0.245503	0.312039	-0.211043	-0.677819	0.146687
855843	NSL1	YPL233W	S000006154	Essential component of the MIND kinetochore complex; joins kinetochore subunits contacting DNA to those contacting microtubules; required for accurate chromosome segregation; complex consists of Mtw1p Including Nnf1p-Nsl1p-Dsn1p (MIND)	0.289238	3.20797e-05	0.09657	-0.0409088	0.606572	0.510962	0.303304	1.04379	0.509832	-0.0242886	0.312503	0.290402	0.177453	0.580462	0.290625	-0.43055	-0.838765	-0.700184	-0.717487	-0.145897	0.630413	-0.121568	-0.0318376	-0.761661	-0.76035	0.698336	0.145285	0.153586	0.42783	-0.0362761	0.514564	-0.0222848	-0.335109	0.577442	0.347633	0.506563	-0.281974	-0.201654	0.0757533	-0.113312	0.863235	-0.0861241	-0.366369	0.209133	-0.0301463
853409	NSP1	YJL041W	S000003577	FG-nucleoporin component of central core of the nuclear pore complex; also part of the nuclear pore complex (NPC) nuclear basket; contributes directly to nucleocytoplasmic transport and maintenance of the NPC permeability barrier; found in stable complex with Nup82p, Gle2p and two other FG-nucleoporins (Nup159p and Nup116p); also found in stable complex with Nic96p and two other FG-nucleoproteins…	0.123569	7.83952e-05	0.465114	0.196418	0.690327	0.53727	0.241211	0.664044	0.270548	0.114577	0.478398	0.35981	0.150228	0.405881	0.156808	-0.530942	0.11886	0.414472	0.295296	0.491923	-0.68129	-0.405724	0.18255	-0.118401	0.227148	-0.147826	0.190131	0.50648	0.86718	0.376989	-0.388325	-0.439016	-0.417391	0.719917	0.490135	-0.468955	0.161716	0.507368	0.544403	0.521206	-0.673511	-0.476149	-0.00791556	0.167416	0.354852
853796	NUP100	YKL068W	S000001551	FG-nucleoporin component of central core of the nuclear pore complex; contributes directly to nucleocytoplasmic transport and maintenance of the nuclear pore complex (NPC) permeability barrier and is involved in gene tethering at the nuclear periphery; NUP100 has a paralog, NUP116, that arose from the whole genome duplication	0.849503	0.00256316	0.217075	0.0565874	0.73736	0.595933	0.171226	0.215536	0.10407	0.0363146	0.51826	0.390195	0.109013	0.139664	0.0673618	-0.403658	0.350168	0.575177	0.364832	0.299888	-0.846589	-0.32875	0.310201	0.161592	0.343109	0.472939	0.0618346	-0.512899	-0.483533	-0.447845	0.394724	0.766342	-0.0765006	-0.163781	-0.261085	-0.266369	0.553397	0.489472	0.202456	0.132016	-0.966367	0.0433031	0.400606	0.124073	0.32262
853957	NUP133	YKR082W	S000001790	Subunit of Nup84p subcomplex of nuclear pore complex (NPC); contributes to nucleocytoplasmic transport, NPC biogenesis; is involved in establishment of a normal nucleocytoplasmic concentration gradient of GTPase Gsp1p; also plays roles in several processes that may require localization of genes or chromosomes at nuclear periphery, including double-strand break repair, transcription and chromatin …	0.20578	0.000750622	0.414136	-0.0100536	0.6058	0.609699	0.276543	0.502772	0.264734	-0.00676506	0.461994	0.437826	0.216262	0.357639	0.169731	-0.641726	-0.0961687	0.114588	0.355408	0.580662	-0.520081	-0.275381	-0.295824	-0.131102	0.0917797	0.285337	0.259347	-0.0219295	0.609304	0.546215	-0.0427141	0.357473	-0.800137	0.224501	0.41481	-0.356003	0.0523305	0.0777292	0.571577	0.714625	-0.422197	-0.0380913	-0.618709	0.00836887	0.273229
852199	NUP170	YBL079W	S000000175	Subunit of inner ring of nuclear pore complex (NPC); contributes to NPC assembly and nucleocytoplasmic transport; interacts with genomic regions that contain ribosomal protein and subtelomeric genes, where it functions in nucleosome positioning and as a repressor of transcription; both Nup170p and NUP157p are similar to human Nup155p; NUP170 has a paralog, NUP157, that arose from the whole genome…	0.0175608	0.000295511	0.223686	0.003774	0.792337	0.630624	0.180217	0.444684	0.296755	0.00202068	0.544026	0.408229	0.123699	0.295447	0.18077	-0.880954	-0.27917	-0.0860939	-0.00162247	0.193886	-0.527829	-0.237618	-0.113455	-0.195938	-0.252642	-0.617287	-0.579551	-0.711286	-0.0973222	0.108988	0.115794	0.221209	-0.831186	-0.232092	-0.505998	-0.900794	-0.432595	-0.337503	-0.0385205	0.187955	-0.353601	-0.0943864	-0.404082	-0.23668	-0.384405
854868	NUP188	YML103C	S000004571	Subunit of the inner ring of the nuclear pore complex (NPC); contributes to NPC organization and nucleocytoplasmic transport; homologous to human NUP188	0.0109168	0.000371247	0.583192	0.150174	0.534098	0.623541	0.264997	0.556218	0.275767	0.0873011	0.428033	0.440638	0.185249	0.372351	0.174003	-0.747173	-0.0799118	0.165872	0.190663	0.33288	-0.646092	-0.323623	-0.0186304	-0.0917087	-0.0112734	-0.589732	0.121139	0.0668635	0.396227	0.225383	-0.742962	0.0635237	-0.411486	0.27581	0.082875	-0.724254	-0.00647605	0.136101	0.279508	0.308275	-0.716063	-0.19079	-0.170955	0.0452777	0.0244362
851048	NUP2	YLR335W	S000004327	Nucleoporin involved in nucleocytoplasmic transport; binds to either the nucleoplasmic or cytoplasmic faces of the nuclear pore complex depending on Ran-GTP levels; also has a role in chromatin organization	0.036119	0.000321618	0.175298	-0.0377799	0.717236	0.558575	0.311719	0.667338	0.192838	-0.0237893	0.435238	0.361329	0.185456	0.376822	0.0997672	-0.111307	0.236725	0.635015	0.642467	0.843287	-0.410743	-0.552526	0.0392985	-0.0306239	0.588324	0.769879	0.448046	0.621595	0.77006	0.469813	0.203141	-0.267219	-0.1401	0.504244	0.788736	0.393924	0.421785	0.780949	0.875379	0.822272	-0.139596	-0.514232	-0.0595245	0.285005	0.852086
853016	NUP57	YGR119C	S000003351	FG-nucleoporin component of central core of the nuclear pore complex; contributes directly to nucleocytoplasmic transport and maintenance of the nuclear pore complex (NPC) permeability barrier; found in stable complex with Nic96p and two other FG-nucleoproteins (Nsp1p and Nup49p)	0.0976695	0.000629475	0.315255	-0.102549	0.573927	0.560255	0.236888	0.555455	0.390032	-0.0510923	0.338963	0.326502	0.135759	0.311383	0.207868	-0.894822	-0.360153	-0.0618312	-0.0343248	0.158571	-0.439261	-0.372606	-0.0395374	-0.201989	-0.287652	-0.259488	0.000738709	0.100282	0.721241	0.570017	-0.260422	-0.133608	-0.777762	0.342288	0.296408	-0.839699	-0.307317	-0.0235741	0.180866	0.301511	-0.450971	-0.3571	-0.260407	-0.0727314	-0.159248
853385	NUP82	YJL061W	S000003597	Linker nucleoporin component of the nuclear pore complex (NPC); also part of the NPC cytoplasmic filaments; contributes to nucleocytoplasmic transport and NPC biogenesis; forms stable associations with three FG-nucleoporins (Nsp1p, Nup159p, and Nup116p); relocalizes to the cytosol in response to hypoxia	0.0375491	0.002979	0.503002	0.0349112	0.363358	0.494692	0.271609	0.580465	0.103605	0.0219261	0.279671	0.354061	0.173992	0.360804	0.0622252	-0.437884	0.164402	0.52531	0.447853	0.570246	-0.645839	-0.496823	0.138283	-0.00375253	0.351677	0.0998958	0.677561	0.79357	0.764274	0.263443	-0.757159	-0.207631	0.0979474	0.703296	0.709605	-0.238336	0.423051	0.712013	0.647945	0.493957	-0.773457	-0.420144	0.135673	0.325635	0.55986
851441	NUP84	YDL116W	S000002274	Subunit of the Nup84p subcomplex of the nuclear pore complex (NPC); contributes to nucleocytoplasmic transport and NPC biogenesis; also plays roles in several processes that may require localization of genes or chromosomes at the nuclear periphery, including double-strand break repair, transcription and chromatin silencing; homologous to human NUP107	0.0813504	0.000566992	0.465161	-0.0530678	0.508742	0.562298	0.371027	0.590811	0.302564	-0.0301814	0.345864	0.350339	0.231341	0.353402	0.168618	-0.699582	-0.0678998	0.153662	0.261348	0.46408	-0.613695	-0.292046	-0.124423	-0.133498	0.0469938	0.243238	0.732384	0.612294	0.858513	0.585035	-0.683163	0.104922	-0.264464	0.500908	0.799135	-0.436258	0.250398	0.370781	0.555091	0.597675	-0.752989	-0.180724	-0.204687	0.104466	0.366114
851639	OCA6	YDR067C	S000002474	Cytoplasmic protein required for replication of Brome mosaic virus; S. cerevisiae is a model system for studying positive-strand RNA virus replication; null mutation confers sensitivity to tunicamycin and DTT	0.0129161	0.000224122	0.165573	0.235807	0.222079	0.247388	0.297657	1.02626	0.480642	0.148277	0.152224	0.17098	0.198089	0.623284	0.26025	-0.242424	-0.0193416	0.199597	0.330692	0.879287	-0.217959	-0.292253	-0.150508	-0.460992	0.283352	0.127135	0.430071	0.720794	0.974781	0.606607	-0.416867	-0.423046	-0.265964	0.626404	0.758918	-0.0110127	0.312155	0.624411	0.87095	0.835881	-0.405861	-0.442886	-0.263939	0.265792	0.689378
851911	OMS1	YDR316W	S000002724	Protein integral to the mitochondrial membrane; has a conserved methyltransferase motif and is predicted to be an RNA methyltransferase; multicopy suppressor of respiratory defects caused by OXA1 mutations	0.0469895	0.006114	0.27401	-0.0864301	0.386957	0.631112	-0.00109789	0.652288	0.136194	-0.0492655	0.212912	0.375255	-0.000578942	0.340508	0.0658333	-0.0629459	0.100393	0.648553	0.408794	0.676506	-0.189934	-0.743137	0.353037	-0.159419	0.464316	0.731953	0.588226	0.668084	0.863653	0.49269	-0.0121001	-0.152275	-0.196116	0.599754	0.863591	0.382278	0.413679	0.846776	0.791705	0.764248	-0.140989	-0.612802	0.134633	0.237188	0.830821
852969	PAC10	YGR078C	S000003310	Part of the heteromeric co-chaperone GimC/prefoldin complex; complex promotes efficient protein folding	0.359347	4.5297e-05	0.63113	0.586745	0.401315	0.810538	0.273621	0.44855	0.31726	0.308213	0.227673	0.473228	0.16249	0.268833	0.177153	-0.552203	-0.559788	0.0181703	0.0379501	0.43178	0.155879	-0.73246	-0.0236255	-0.383776	-0.165	-0.768877	-0.550185	-0.775582	-0.366999	-0.0823789	-0.0729411	0.344617	-0.576331	-0.381842	-0.665993	-0.850847	-0.702648	-0.530555	-0.234331	0.188552	0.0379407	-0.176973	-0.415406	-0.48496	-0.558486
851949	PAL1	YDR348C	S000002756	Protein of unknown function thought to be involved in endocytosis; physically interacts with Ede1p and is found at endocytic sites at cell periphery during early stages of endocytosis; green fluorescent protein (GFP)-fusion protein localizes to bud neck; potential Cdc28p substrate; similar to S. pombe Pal1 protein; relocalizes from bud neck to cytoplasm upon DNA replication stress; PAL1 has a par…	0.0149816	0.000267194	0.616929	0.0470247	0.66811	0.41798	0.346756	0.525795	0.380535	0.0247004	0.295835	0.221075	0.160182	0.268238	0.192534	0.0159218	-0.430099	0.00891574	-0.470554	-0.172577	0.559959	-0.555999	0.607171	-0.422632	-0.280179	0.59849	-0.159703	0.0805687	-0.144051	-0.135632	0.8005	-0.310104	0.290307	-0.0465798	0.0407477	0.404707	-0.283348	0.0572703	-0.289594	-0.161294	0.763117	-0.435246	0.443146	-0.205017	-0.0882627
851654	PDC2	YDR081C	S000002488	Transcription factor for thiamine-regulated genes; required for expression of the two isoforms of pyruvate decarboxylase (PDC1 and PDC5) along with thiamine biosynthetic genes; binds a DNA sequence in the PDC5 promoter; mutant fails to grow on 2% glucose and thus is scored as inviable under standard conditions	0.051779	0.000287001	0.277874	0.0496995	0.595854	0.701196	0.148108	0.518587	0.317534	0.0272131	0.404825	0.465273	0.0953951	0.343153	0.199138	-0.871476	-0.358618	-0.0303811	-0.134694	0.0939213	-0.417855	-0.41286	0.129615	-0.264297	-0.314738	-0.771421	-0.467902	-0.649458	-0.143041	-0.0628459	-0.179566	0.279485	-0.690405	-0.118089	-0.54083	-0.950944	-0.439356	-0.231915	-0.154579	0.0558781	-0.395198	-0.244599	-0.115619	-0.251406	-0.427159
854506	PDR10	YOR328W	S000005855	ATP-binding cassette (ABC) transporter; multidrug transporter involved in the pleiotropic drug resistance network; regulated by Pdr1p and Pdr3p	0.0160462	0.000707975	0.119911	0.254691	0.517419	0.16499	0.176647	1.21383	0.545024	0.205878	0.393456	0.109364	0.11468	0.726733	0.35087	0.547544	0.884452	0.487892	0.0768234	0.195282	-0.571209	0.464177	0.557401	-0.0981073	0.570275	0.572112	0.655873	0.724556	0.830228	0.187028	-0.257509	-0.142474	-0.07807	0.863136	0.787989	0.693493	0.905156	0.790109	0.698489	0.233694	-0.451449	0.0848991	0.176516	0.649833	0.876297
852278	PDR3	YBL005W	S000000101	Transcriptional activator of the pleiotropic drug resistance network; regulates expression of ATP-binding cassette (ABC) transporters through binding to cis-acting PDRE sites (PDR responsive elements); has a role in response to drugs and organic solvents; post-translationally up-regulated in cells lacking functional mitochondrial genome; involved in diauxic shift; relative distribution to nucleus…	0.127552	1.51606e-07	0.0808627	0.161161	0.762128	0.791681	0.716279	1.25068	0.520144	0.0805179	0.441577	0.422747	0.404351	0.658224	0.257538	-0.73243	-0.231074	-0.143032	0.0790952	0.479853	-0.440142	-0.10039	-0.291946	-0.379804	-0.138943	0.285615	0.606047	0.509873	0.842301	0.243538	-0.480981	0.0825294	-0.38137	0.821898	0.664528	-0.455368	0.161202	0.179398	0.565113	0.55281	-0.659274	-0.0367807	-0.47413	0.162008	0.274268
852949	PEF1	YGR058W	S000003290	Penta-EF-hand protein; required for polar bud growth and cell wall abscission; binds calcium and zinc with different affinity; localizes to bud site in G1, bud neck in G2; binds to Sec31p and modulates COPII coat assembly	0.0685335	3.51493e-05	0.312568	0.18354	0.582067	0.730238	0.152585	0.617585	0.722648	0.0942018	0.346098	0.444285	0.0915558	0.357352	0.382464	-0.849955	-0.427633	0.0111321	-0.0347456	0.163317	-0.309037	-0.555853	0.0588854	-0.207267	-0.274206	-0.252083	-0.0695309	0.0104313	0.607049	0.727442	-0.164133	-0.101945	-0.753867	0.0404206	0.255155	-0.706359	-0.323103	0.0132685	0.318962	0.518299	-0.297663	-0.426498	-0.385657	-0.11484	-0.0382966
852860	PGD1	YGL025C	S000002993	Subunit of the RNA polymerase II mediator complex; associates with core polymerase subunits to form the RNA polymerase II holoenzyme; essential for basal and activated transcription; direct target of Cyc8p-Tup1p transcriptional corepressor	0.226261	0.00302701	0.562948	0.127992	0.645335	0.451791	0.106207	0.393189	0.223233	0.0720056	0.397368	0.304232	0.0675053	0.242607	0.138511	-0.817471	-0.373582	0.110609	0.0309653	0.104723	-0.344923	-0.620946	0.10923	-0.0655549	-0.217722	-0.451353	-0.853849	-0.492478	-0.0466562	-0.204728	0.628691	-0.419314	-0.601713	0.145713	-0.535915	-0.828974	-0.718562	-0.178228	-0.00204407	-0.0315374	0.0799439	-0.6698	-0.236532	0.0289519	-0.438865
855400	PHA2	YNL316C	S000005260	Prephenate dehydratase; catalyzes the conversion of prephanate to phenylpyruvate, which is a step in the phenylalanine biosynthesis pathway	0.0174184	6.38364e-05	0.346927	0.08947	0.375341	0.686171	0.454715	0.805398	0.349028	0.0558527	0.227261	0.394553	0.236256	0.418809	0.179864	0.270841	0.565381	0.900043	0.573778	0.672184	-0.444316	-0.492377	0.481756	0.0535939	0.783729	0.75065	0.912679	0.816739	0.6416	0.232682	-0.403807	0.0586864	0.284204	0.578885	0.882719	0.638331	0.876128	0.950985	0.690603	0.447064	-0.469893	-0.167656	0.402329	0.426487	0.947731
850594	PHO4	YFR034C	S000001930	Basic helix-loop-helix (bHLH) transcription factor of the myc-family; activates transcription cooperatively with Pho2p in response to phosphate limitation; binding to 'CACGTG' motif is regulated by chromatin restriction, competitive binding of Cbf1p to the same DNA binding motif and cooperation with Pho2p; function is regulated by phosphorylation at multiple sites and by phosphate availability	0.0178639	0.000117863	0.593636	0.194243	0.699107	0.550917	0.551634	0.338928	0.248692	0.105249	0.436206	0.362144	0.347874	0.20548	0.131995	-0.574198	-0.143426	0.218328	0.486365	0.622177	-0.392777	-0.47434	-0.322291	-0.006968	0.16905	-0.398959	-0.400919	0.0667939	0.280612	0.696914	0.108168	-0.596741	-0.265336	-0.341965	0.0513664	-0.539489	-0.23381	0.177215	0.438119	0.671572	-0.24374	-0.533508	-0.316422	-0.11739	0.137101
850403	PHO87	YCR037C	S000000633	Low-affinity inorganic phosphate (Pi) transporter; acts upstream of Pho81p in regulation of the PHO pathway; expression is independent of Pi concentration and Pho4p activity; contains 12 membrane-spanning segments; PHO87 has a paralog, PHO90, that arose from the whole genome duplication	0.0128263	0.000218795	0.136534	-0.146099	0.639929	0.620733	0.385746	0.68275	0.377767	-0.0785229	0.421257	0.322484	0.200503	0.354353	0.209423	-0.547731	0.284158	0.208117	0.0133277	-0.0201496	-0.907165	0.0802164	0.262359	0.037008	0.0191225	0.473155	0.877534	0.479174	0.331222	-0.117963	-0.636848	0.467123	0.223914	0.536929	0.551445	-0.0896577	0.676542	0.403754	0.194463	-0.0792432	-0.945423	0.314072	0.295715	0.325222	0.32177
855747	PHO91	YNR013C	S000005296	Low-affinity vacuolar phosphate transporter; exports phosphate from the vacuolar lumen to the cytosol; regulates phosphate and polyphosphate metabolism; acts upstream of Pho81p in regulation of the PHO pathway; localizes to sites of contact between the vacuole and mitochondria (vCLAMPs); deletion of pho84, pho87, pho89, pho90, and pho91 causes synthetic lethality; transcription independent of Pi …	0.0836693	0.00252265	0.104879	0.223727	0.673531	0.729577	-0.0119466	0.308502	-0.0800949	0.12009	0.4261	0.400697	-0.00655398	0.171818	-0.041158	-0.191523	0.470287	0.653197	0.468367	0.619924	-0.786395	-0.281484	0.283913	-0.0274823	0.543814	-0.13078	0.256113	-0.396647	-0.0335498	0.0137404	-0.454741	0.856118	-0.48972	-0.0561779	-0.0802331	-0.227517	0.531951	0.429659	0.411172	0.568118	-0.900388	0.096423	0.0563516	-0.0480215	0.460443
855860	PLC1	YPL268W	S000006189	Phospholipase C; hydrolyzes phosphatidylinositol 4,5-biphosphate (PIP2) to generate the signaling molecules inositol 1,4,5-triphosphate (IP3) and 1,2-diacylglycerol (DAG); involved in regulating many cellular processes; Plc1p and inositol polyphosphates are required for acetyl-CoA homeostasis which regulates global histone acetylation	0.0322646	0.0046078	0.0459496	-0.270104	0.618389	0.57946	0.210911	0.501322	0.372679	-0.132249	0.36423	0.357102	0.128134	0.300584	0.208721	-0.952966	-0.544908	-0.229498	-0.15652	0.0513415	-0.263706	-0.381356	-0.10992	-0.249325	-0.457553	-0.496136	-0.650909	-0.470771	0.164567	0.307977	0.327206	-0.191736	-0.839768	-0.0998135	-0.31313	-0.93287	-0.633287	-0.320196	-0.086301	0.126748	-0.131819	-0.371463	-0.320425	-0.235911	-0.468279
854864	PML39	YML107C	S000004575	Protein required for nuclear retention of unspliced pre-mRNAs; required along with Mlp1p and Pml1p; anchored to nuclear pore complex via Mlp1p and Mlp2p; found with the subset of nuclear pores farthest from the nucleolus; may interact with ribosomes	0.893198	2.74669e-06	0.179734	0.234368	0.719873	0.585634	0.206147	0.957273	0.721624	0.111889	0.353325	0.282909	0.104242	0.458037	0.355377	-0.826044	-0.391657	-0.424047	-0.64854	-0.369972	-0.330632	0.0735077	0.251427	-0.450374	-0.672262	0.294315	0.110063	0.0368101	0.647389	0.132112	0.155095	0.0898339	-0.769504	0.686778	0.312908	-0.396896	-0.22944	-0.363663	0.270987	-0.177353	-0.106674	0.197683	-0.83068	0.520128	-0.220313
855442	PRM1	YNL279W	S000005223	Pheromone-regulated multispanning membrane protein; involved in membrane fusion during mating; predicted to have 5 transmembrane segments and a coiled coil domain; localizes to the shmoo tip; regulated by Ste12p	0.0814936	9.12421e-05	0.198201	0.767956	0.160468	0.350534	0.191235	0.693001	0.700861	0.620588	0.115565	0.249921	0.137214	0.501755	0.43581	0.852808	0.439104	0.314883	0.11267	0.444139	0.29738	0.132968	0.279943	-0.301621	0.52751	0.166902	0.456908	0.543627	0.861534	0.903053	-0.411046	-0.151404	-0.360411	0.18671	0.756565	0.642887	0.577776	0.557986	0.643333	0.877677	-0.0879482	-0.0177813	-0.0651432	-0.0639175	0.832234
854774	PRM2	YIL037C	S000001299	Pheromone-regulated protein; predicted to have 4 transmembrane segments and a coiled coil domain; regulated by Ste12p; required for efficient nuclear fusion	0.339003	0.00168718	0.259762	0.250478	0.528348	0.155639	0.0264741	0.926305	0.241735	0.185314	0.389093	0.106437	0.0199401	0.637609	0.151815	0.146101	0.470263	0.168683	0.146209	0.733821	-0.44874	0.368529	0.0413708	-0.54888	0.411562	0.334898	0.2737	0.338134	0.866327	0.369913	-0.0113081	-0.107448	-0.642172	0.725913	0.567475	0.373397	0.541734	0.391279	0.809672	0.798412	-0.311848	0.160289	-0.499207	0.225751	0.743288
855745	PRP2	YNR011C	S000005294	RNA-dependent DExD/H-box ATPase; required for activation of spliceosome before first transesterification step in RNA splicing; implicated in rearranging and proofreading snRNA structure in catalytic activation of spliceosome; ortholog of human protein DHX16	0.0606179	0.000776675	0.248154	0.0185583	0.679681	0.514838	0.0731544	0.521337	0.341036	0.0094475	0.40643	0.302735	0.0440002	0.313003	0.190965	-0.887909	-0.337312	-0.133154	-0.172927	0.127094	-0.46124	-0.248024	0.0400922	-0.345831	-0.345846	-0.504402	-0.591442	-0.613274	0.0739329	0.182042	0.243719	0.0746722	-0.916312	-0.0885237	-0.392739	-0.920518	-0.517645	-0.363876	-0.106959	0.177901	-0.265744	-0.166584	-0.352898	-0.313194	-0.440991
851830	PRP28	YDR243C	S000002651	RNA binding protein; involved in RNA isomerization at the 5' splice site and for exchange of U6 for U1 snRNA at the 5' splice site; similar to the RNA helicases of the DEAD-box family	0.339003	9.69165e-06	0.285539	0.046683	0.680553	0.852331	0.348641	0.710309	0.804748	0.0279595	0.473605	0.512364	0.213222	0.437271	0.469286	-0.727205	0.00831523	0.131449	-0.0763985	0.0522791	-0.737723	-0.165839	0.272994	-0.148916	-0.12759	0.503015	0.795846	0.38553	0.609364	0.600352	-0.50366	0.489432	-0.253549	0.170439	0.741521	-0.180039	0.597201	0.386285	0.39427	0.48552	-0.935446	0.237151	0.0195389	0.0131961	0.453426
851531	PRP9	YDL030W	S000002188	Subunit of the SF3a splicing factor complex; required for spliceosome assembly; acts after the formation of the U1 snRNP-pre-mRNA complex	0.016698	0.000242063	0.250551	-0.103921	0.404022	0.5728	0.429694	0.634966	0.410118	-0.0503835	0.22293	0.322067	0.249036	0.372322	0.248145	-0.95891	-0.787668	-0.62674	-0.5305	-0.313883	0.03742	-0.15547	-0.169824	-0.357153	-0.825086	-0.58543	-0.587101	-0.798918	-0.602159	-0.79186	0.1572	0.329231	-0.310183	0.0301818	-0.862716	-0.920762	-0.786465	-0.719902	-0.588341	-0.471674	0.0740463	-0.028959	-0.221651	-0.272525	-0.894103
851312	PRR2	YDL214C	S000002373	Serine/threonine protein kinase; inhibits pheromone induced signalling downstream of MAPK, possibly at the level of the Ste12p transcription factor; mutant has increased aneuploidy tolerance; PRR2 has a paralog, NPR1, that arose from the whole genome duplication	0.351954	1.2086e-06	0.0554238	0.614134	0.0836503	0.825903	0.468085	0.993727	0.520591	0.467233	0.0612877	0.568042	0.383861	0.834517	0.400382	0.015973	-0.551501	-0.687023	-0.590257	0.0334642	0.713573	0.224138	-0.175115	-0.780087	-0.505507	-0.0563975	0.319982	-0.327627	0.0319183	-0.121519	-0.461146	0.844306	-0.479932	0.161893	-0.0376102	-0.0285714	-0.208011	-0.792225	-0.450589	-0.0623273	0.234544	0.799766	-0.492926	-0.507628	-0.433566
854102	PSH1	YOL054W	S000005415	E3 ubiquitin ligase targeting centromere-binding protein Cse4p; mediates polyubiquitination and degradation of histone H3 variant Cse4p, preventing its mislocalization to euchromatin independent of Slx5p; ubiquitination of Cse4p may be antagonized by Scm3p	0.202497	1.96775e-05	0.182675	0.025016	0.316587	0.633521	0.438432	0.741411	0.81787	0.0128848	0.167391	0.382067	0.236704	0.417095	0.437361	-0.737135	-0.838324	-0.337656	-0.439856	-0.184013	0.323271	-0.607393	0.103366	-0.372366	-0.652678	0.312295	0.277457	0.736403	0.790399	0.812339	-0.0386632	-0.63703	-0.0117964	0.187446	0.755768	-0.515653	-0.624202	0.0521397	-0.0141544	0.228152	0.273906	-0.859512	0.0878567	-0.246056	-0.223676
855168	PSO2	YMR137C	S000004745	Nuclease required for DNA single- and double-strand break repair; acts at a post-incision step in repair of breaks that result from interstrand cross-links produced by a variety of mono- and bi-functional psoralen derivatives; induced by UV-irradiation; forms nuclear foci upon DNA replication stress	0.0285844	0.000697033	0.234786	0.160277	0.228573	0.567436	0.173644	0.937268	0.605316	0.0840353	0.142203	0.341254	0.11092	0.5434	0.316204	-0.800692	-0.508903	-0.239915	-0.0755382	0.385169	-0.156975	-0.321838	-0.22633	-0.480718	-0.322236	-0.173901	0.249285	0.277919	0.798497	0.57936	-0.489224	-0.0575447	-0.63716	0.430668	0.45906	-0.556233	-0.110529	0.0562182	0.497873	0.60235	-0.416424	-0.215234	-0.55434	0.0274147	0.13344
852234	PSY4	YBL046W	S000000142	Regulatory subunit of protein phosphatase PP4; presence of Psy4p in the PP4 complex (along with catalytic subunit Pph3p and Psy2p) is required for dephosphorylation of the histone variant H2AX, but not for dephosphorylation of Rad53p, during recovery from the DNA damage checkpoint; localization is cell-cycle dependent and regulated by Cdc28p phosphorylation; required for cisplatin resistance; hom…	0.101248	0.00154341	0.466731	0.105654	0.485296	0.460666	0.152835	0.712161	0.144957	0.0655266	0.271771	0.293897	0.0841768	0.415292	0.0801373	0.0901243	0.0160001	0.497887	0.0926513	0.53671	0.0698856	-0.647746	0.550789	-0.419514	0.312543	0.735318	0.220734	0.517627	0.46205	0.0732119	0.456109	-0.41526	0.110017	0.51124	0.516448	0.505983	0.144383	0.65123	0.342405	0.408781	0.323351	-0.691085	0.440605	0.0243319	0.524645
851558	PTC1	YDL006W	S000002164	Type 2C protein phosphatase (PP2C); dephosphorylates Hog1p, inactivating osmosensing MAPK cascade; involved in Fus3p activation during pheromone response; deletion affects precursor tRNA splicing, mitochondrial inheritance, and sporulation	0.0243239	0.000380517	0.646745	0.141126	0.261749	0.517161	0.282369	0.682025	0.392307	0.079608	0.146373	0.284745	0.14675	0.349174	0.183573	0.176339	0.354613	0.696149	0.566761	0.885265	-0.272215	-0.485427	0.21708	-0.168363	0.689796	0.588109	0.801699	0.823016	0.895146	0.67277	-0.425969	-0.0901145	-0.0280887	0.459511	0.984474	0.455234	0.673643	0.845865	0.831531	0.838368	-0.396864	-0.282748	0.0830344	0.213445	0.945399
853060	PTI1	YGR156W	S000003388	Essential component of CPF (cleavage and polyadenylation factor); involved in 3' end formation of snoRNA and mRNA; interacts directly with Pta1p; relocalizes to the cytosol in response to hypoxia; similar to mammalian Cleavage-Stimulation Factor CstF-64	0.243798	0.000312481	0.591737	0.13412	0.407845	0.579236	0.1966	0.655029	0.316474	0.0813457	0.237209	0.353559	0.112177	0.389847	0.167173	-0.0325177	0.0107709	0.427411	0.181205	0.722333	-0.046142	-0.559808	0.344224	-0.493125	0.328654	0.775507	0.590518	0.596964	0.772339	0.69664	0.0285548	-0.0539583	-0.176029	0.280299	0.872206	0.408056	0.335625	0.631266	0.556112	0.89338	-0.0164807	-0.422396	0.1435	-0.189948	0.714955
850587	PTR3	YFR029W	S000001925	Component of the SPS plasma membrane amino acid sensor system; senses external amino acid concentration and transmits intracellular signals that result in regulation of expression of amino acid permease genes; other members are Ssy1p, Ptr3p, and Ssy5p	0.152942	3.96136e-05	0.112064	0.0964954	0.510617	0.384439	0.145922	1.00398	0.622199	0.0683979	0.370851	0.285308	0.103196	0.640984	0.397541	-0.506064	0.0256642	0.374721	0.0631806	0.394044	-0.538527	-0.470278	0.422823	-0.314127	0.109786	0.408537	0.423777	0.631354	0.953288	0.423488	-0.127503	-0.311011	-0.358774	0.782337	0.746511	0.209571	0.432067	0.774899	0.974062	0.575409	-0.336955	-0.49311	-0.192465	0.656693	0.786292
855716	PUB1	YNL016W	S000004961	Poly (A)+ RNA-binding protein; abundant mRNP-component protein that binds mRNA and is required for stability of many mRNAs; component of glucose deprivation induced stress granules, involved in P-body-dependent granule assembly; implicated in regulation of translation; carries Q/N-rich domain at C- terminus, identified as candidate prion; human homolog Tia1 is critical for normal synaptic plastic…	0.152641	0.00108517	0.412784	0.00805452	0.497071	0.642483	0.209161	0.506067	0.24315	0.00548954	0.342147	0.426946	0.130031	0.314592	0.140183	-0.0656558	0.382464	0.755103	0.549454	0.715586	-0.549438	-0.529295	0.318067	-0.0205757	0.620132	0.841211	0.838195	0.648062	0.7078	0.504843	-0.21903	0.190776	-0.0258381	0.390461	0.910201	0.459596	0.754486	0.887502	0.787069	0.77569	-0.494762	-0.236351	0.195136	0.219883	0.954905
856085	RAD1	YPL022W	S000005943	Single-stranded DNA endonuclease (with Rad10p); cleaves single-stranded DNA during nucleotide excision repair and double-strand break repair; subunit of Nucleotide Excision Repair Factor 1 (NEF1); homolog of human XPF protein	0.0194848	0.0015125	0.186356	-0.0640123	0.526036	0.455077	0.10913	0.777684	0.196444	-0.0336389	0.311365	0.27481	0.0582354	0.394013	0.0949585	-0.41131	0.110827	0.533752	0.405232	0.589611	-0.551496	-0.575917	0.203521	-0.0770285	0.337621	0.280446	0.449016	0.762687	0.961248	0.441983	-0.28752	-0.455287	-0.192641	0.77391	0.770209	-0.116467	0.316599	0.763685	0.787607	0.625842	-0.516937	-0.624121	0.0283383	0.37041	0.639528
850430	RAD18	YCR066W	S000000662	E3 ubiquitin ligase; forms heterodimer with Rad6p to monoubiquitinate PCNA-K164; heterodimer binds single-stranded DNA and has single-stranded DNA dependent ATPase activity; required for postreplication repair; SUMO-targeted ubiquitin ligase (STUbl) that contains a SUMO-interacting motif (SIM) which stimulates its ubiquitin ligase activity towards the sumoylated form of PCNA	0.272365	0.000155485	0.121296	0.0167122	0.630317	0.657073	0.151492	0.799862	0.322043	0.0087092	0.35823	0.367352	0.0831457	0.404552	0.167005	-0.657474	-0.0491934	0.344578	0.236164	0.332263	-0.595249	-0.524525	0.163574	-0.033537	0.0815239	0.343836	0.366611	0.33041	0.763517	0.0781553	-0.119893	0.0204378	-0.52249	0.887626	0.500765	-0.26605	0.246049	0.537812	0.787614	0.330996	-0.57728	-0.41032	-0.274711	0.665265	0.456945
854998	RAD33	YML011C	S000004472	Protein involved in nucleotide excision repair; green fluorescent protein (GFP)-fusion protein localizes to the nucleus	0.0207689	0.000102362	0.0152162	-0.060652	0.123713	0.175746	0.440428	0.984748	0.936931	-0.0304555	0.0619883	0.106302	0.261393	0.554236	0.506034	-0.681012	-0.979695	-0.784967	-0.593602	-0.283988	0.558215	-0.186084	-0.302289	-0.466866	-0.874666	0.0352487	-0.0902453	0.455631	0.785163	0.571275	0.149401	-0.725445	-0.381868	0.421886	0.457565	-0.52995	-0.849815	-0.35341	0.00606626	0.124263	0.544991	-0.600791	-0.481823	-0.11659	-0.424893
851577	RAD61	YDR014W	S000002421	Subunit of a complex that inhibits sister chromatid cohesion; also negatively regulates chromosome condensation; inhibited by Eco1p-acetylated cohesin subunits Smc3p and Mcd1p; binds Smc3p ATPase head of cohesin; related to the human Wapl protein that controls the association of cohesin with chromatin	0.0284524	0.00161281	0.236344	-0.0093109	0.572087	0.477939	0.160194	0.728667	0.295426	-0.00661479	0.493258	0.503119	0.15537	0.684124	0.252017	-0.886717	-0.63618	-0.24376	-0.200196	0.13921	-0.082005	-0.477674	-0.073808	-0.39244	-0.465347	-0.511153	-0.705273	-0.271994	0.238969	0.0397021	0.380955	-0.52719	-0.667193	0.262573	-0.311223	-0.847552	-0.751377	-0.288644	-0.0413576	0.115899	0.102873	-0.563169	-0.334942	-0.168213	-0.462981
851803	RAD9	YDR217C	S000002625	DNA damage-dependent checkpoint protein; required for cell-cycle arrest in G1/S, intra-S, and G2/M, plays a role in postreplication repair (PRR) pathway; transmits checkpoint signal by activating Rad53p and Chk1p; hyperphosphorylated by Mec1p and Tel1p; multiple cyclin dependent kinase consensus sites and the C-terminal BRCT domain contribute to DNA damage checkpoint activation; Rad9p Chk1 Activa…	0.0437574	0.000560497	0.606727	0.0626629	0.682241	0.639431	0.140194	0.380828	0.350429	0.0341552	0.457313	0.449554	0.0935361	0.265001	0.231979	-0.918465	-0.475914	-0.118894	-0.203453	-0.0343547	-0.316477	-0.442475	0.0978369	-0.222996	-0.430254	-0.806172	-0.883051	-0.792005	-0.433054	-0.140721	0.310808	-0.0543944	-0.514811	-0.407053	-0.801784	-0.973912	-0.68291	-0.38951	-0.313225	-0.0787869	-0.110092	-0.341238	-0.12638	-0.317415	-0.618714
851776	REF2	YDR195W	S000002603	RNA-binding protein; involved in the cleavage step of mRNA 3'-end formation prior to polyadenylation, and in snoRNA maturation; part of holo-CPF subcomplex APT, which associates with 3'-ends of snoRNA- and mRNA-encoding genes; putative regulatory subunit of type 1 protein phosphatase Glc7p, required for actomyosin ring formation, and for timely dephosphorylation and release of Bnr1p from the divi…	0.0179252	0.0021937	0.571234	0.125939	0.46178	0.438797	0.041728	0.466641	0.416018	0.0605777	0.266317	0.24958	0.022236	0.279022	0.231138	-0.803603	-0.378243	-0.172482	-0.479401	-0.125734	-0.32516	-0.247035	0.374992	-0.480666	-0.490028	-0.932988	-0.592206	-0.479559	-0.33246	0.0603362	-0.1839	-0.105692	-0.222863	-0.480869	-0.586061	-0.883885	-0.468993	-0.286359	-0.449743	-0.0669065	-0.29065	-0.209044	0.184694	-0.501978	-0.544912
853531	RFC2	YJR068W	S000003829	Subunit of heteropentameric Replication factor C (RF-C); RF-C is a DNA binding protein and ATPase that acts as a clamp loader of the proliferating cell nuclear antigen (PCNA) processivity factor for DNA polymerases delta and epsilon	0.059878	0.000620821	0.179539	-0.08932	0.191059	0.682147	0.336565	0.677388	0.453008	-0.0453821	0.0896496	0.359131	0.154452	0.314489	0.204611	-0.109402	-0.340872	0.375947	0.14718	0.30596	0.321772	-0.935559	0.318216	-0.119791	0.0994944	0.82184	0.710835	0.839397	0.726214	0.427149	-0.0773027	-0.227026	0.207573	0.491447	0.914965	0.494334	0.277589	0.801918	0.585332	0.477904	0.143209	-0.72476	0.335492	0.26249	0.685126
855426	RFC3	YNL290W	S000005234	Subunit of heteropentameric Replication factor C (RF-C); which is a DNA binding protein and ATPase that acts as a clamp loader of the proliferating cell nuclear antigen (PCNA) processivity factor for DNA polymerases delta and epsilon; relocalizes to the cytosol in response to hypoxia	0.0845082	0.000686138	0.772502	0.170923	0.267644	0.503018	0.227579	0.576249	0.495359	0.0837736	0.121112	0.263247	0.103678	0.27196	0.222845	0.0285991	-0.324239	0.326389	0.00285168	0.224207	0.438733	-0.84803	0.43429	-0.2206	0.0620123	0.578891	0.28824	0.731237	0.695617	0.584172	0.214293	-0.616459	0.101163	0.295721	0.739456	0.317549	-0.0421023	0.572813	0.362938	0.435996	0.370804	-0.821765	0.309425	0.0230873	0.420698
850873	RFX1	YLR176C	S000004166	Major transcriptional repressor of DNA-damage-regulated genes; recruits repressors Tup1p and Cyc8p to their promoters; involved in DNA damage and replication checkpoint pathway; similar to a family of mammalian DNA binding RFX1-4 proteins	0.0984878	0.000917742	0.280452	0.530595	0.735214	0.468018	0.167009	0.542472	0.0524102	0.342424	0.517091	0.365861	0.133165	0.448618	0.0372653	-0.547869	-0.340191	-0.0813705	-0.0346044	0.601674	-0.117558	-0.321141	-0.0653985	-0.645445	-0.115535	-0.676481	-0.959096	-0.784959	-0.399936	-0.22761	0.536691	-0.160038	-0.54725	-0.278273	-0.80223	-0.747155	-0.821733	-0.565306	-0.284293	0.176332	0.292264	-0.280982	-0.398832	-0.535938	-0.595361
850760	RGR1	YLR071C	S000004061	Subunit of the RNA polymerase II mediator complex; associates with core polymerase subunits to form the RNA polymerase II holoenzyme; required for glucose repression, HO repression, RME1 repression and sporulation	0.0227832	0.00257886	0.437673	0.0135067	0.520907	0.61207	0.162837	0.510218	0.143209	0.00705688	0.345841	0.386431	0.0980041	0.292041	0.0796488	-0.712742	-0.102135	0.257597	0.249452	0.35187	-0.583551	-0.474794	0.030068	-0.0363354	0.0373314	-0.492806	0.100245	0.144761	0.546863	0.143488	-0.619607	-0.0674159	-0.497516	0.548246	0.144773	-0.701603	-0.0423928	0.242223	0.372959	0.312407	-0.64798	-0.378599	-0.146784	0.159352	0.0772311
851417	RGT2	YDL138W	S000002297	Plasma membrane high glucose sensor that regulates glucose transport; low affinity sesnor that contains 12 predicted transmembrane segments and a long C-terminal tail required for hexose transporter induction; phosphorylation of the tail by Yck1p/Yck2p facilitates binding to the HXT co-repressors, Mth1p and Std1p; RGT2 has a paralog, SNF3, that arose from the whole genome duplication	0.0157324	0.00922436	0.175151	-0.12452	0.547932	0.44528	0.0794507	0.455714	0.10304	-0.0535966	0.291656	0.222142	0.0399536	0.224647	0.0499993	-0.870534	-0.232022	-0.0440177	-0.0437811	0.134612	-0.577046	-0.234432	-0.00367672	-0.189991	-0.249607	-0.747787	-0.335767	-0.416867	0.0554031	-0.209677	-0.323072	0.134571	-0.629366	0.279757	-0.40837	-0.912404	-0.28682	-0.167353	-0.016143	0.0370562	-0.549602	-0.138275	-0.204108	-0.0574756	-0.323638
851563	RMD1	YDL001W	S000002159	Cytoplasmic protein required for sporulation	0.228475	0.006404	0.553088	-0.0547756	0.332854	0.43694	0.16049	0.609846	0.142942	-0.0289868	0.193507	0.268146	0.0946072	0.348321	0.0775488	-0.753509	-0.458628	-0.0175577	0.0357007	0.401164	-0.173386	-0.556567	-0.0687144	-0.356006	-0.198767	-0.118537	-0.0255615	0.284898	0.793217	0.259277	-0.0862038	-0.414564	-0.621118	0.744072	0.326015	-0.681484	-0.395577	0.102752	0.357096	0.443719	-0.181114	-0.638226	-0.313838	0.00797536	-0.032424
850609	RMD8	YFR048W	S000001944	Cytosolic protein required for sporulation	0.0597968	2.28175e-05	0.190653	-0.0248844	0.644913	0.548911	0.39462	0.912687	0.507338	-0.0118828	0.338806	0.304475	0.209131	0.466643	0.23798	-0.778346	-0.397595	-0.0378119	0.0473312	0.417116	-0.275424	-0.452192	-0.1106	-0.357246	-0.186579	0.207756	0.181481	0.562917	0.932743	0.63311	-0.021801	-0.525676	-0.424604	0.546727	0.655853	-0.487769	-0.209442	0.267703	0.527978	0.6538	-0.222843	-0.624087	-0.308683	0.0140446	0.202531
852771	RMD9	YGL107C	S000003075	Mitochondrial protein required for respiratory growth; mutant phenotype and genetic interactions suggest a role in delivering mt mRNAs to ribosomes; located on matrix face of the inner membrane and loosely associated with mitoribosomes; RMD9 has a paralog, YBR238C, that arose from the whole genome duplication	0.024868	0.000248381	0.924631	0.292538	0.518019	0.480706	0.330263	0.509022	0.264696	0.17469	0.340225	0.302493	0.206427	0.289313	0.137833	-0.0933997	0.375458	0.606151	0.771443	0.842376	-0.568321	-0.338316	-0.16257	0.133431	0.657478	0.162908	0.468027	0.61015	0.962174	0.747443	-0.429104	-0.226589	-0.398463	0.469621	0.772061	0.0178236	0.427652	0.625742	0.878922	0.824918	-0.523119	-0.298579	-0.272237	0.28684	0.727748
23547380	RME2	RME2	S000144908	Antisense transcript initiated from the 3' end of the IME4 locus; expressed in haploids and interferes with IME4 expression through a cis-acting mechanism; RME2 expression is repressed by the MAT a1/alpha2 repressor complex	0.0432575	5.43693e-05	0.35185	0.174958	0.824361	0.397709	0.186704	0.841343	0.54528	0.0936626	0.489363	0.251714	0.12686	0.543718	0.3221	-0.902321	-0.579629	-0.483796	-0.364321	0.0924716	-0.169143	-0.0840978	-0.188247	-0.553305	-0.57892	-0.324904	-0.64826	-0.392896	0.249158	0.204711	0.495087	-0.292866	-0.842288	0.110452	-0.251419	-0.778899	-0.761556	-0.547583	-0.0884635	0.181689	0.184401	-0.22864	-0.622761	-0.293587	-0.525265
23547379	RME3	RME3	S000144910	Antisense transcript that represses the meiosis-specific ZIP2 gene; expressed in haploid cells under sporulation inducing conditions; regulates ZIP2 in a cis-dependent manner; RME3 is repressed by the MAT a1/alpha2 complex in diploid cells	0.560616	0.000300904	0.560616	0.428129	0.288192	0.346916	0.664879	0.598929	0.416096	0.397391	0.281293	0.290988	0.584411	0.491772	0.317678	0.35902	0.598125	0.320701	0.674213	0.789986	-0.397555	0.326309	-0.422554	0.0628343	0.695824	0.358888	0.885351	0.862341	0.740381	0.510549	-0.761003	-0.0370611	0.220435	0.425968	0.890939	0.396923	0.839392	0.690267	0.786548	0.700411	-0.664833	0.135666	-0.068823	0.294503	0.89035
853427	RNR2	YJL026W	S000003563	Ribonucleotide-diphosphate reductase (RNR), small subunit; the RNR complex catalyzes the rate-limiting step in dNTP synthesis and is regulated by DNA replication and DNA damage checkpoint pathways via localization of the small subunits; RNR2 has a paralog, RNR4, that arose from the whole genome duplication	0.0476831	0.00701285	0.46325	-0.00473144	0.433728	0.455727	0.150035	0.555811	0.0919795	-0.0030416	0.23696	0.270237	0.0892254	0.328901	0.0475978	0.261266	0.076068	0.326092	0.359052	0.892147	0.165047	-0.34128	-0.0166701	-0.437978	0.46727	0.832387	0.286786	0.225634	0.467088	0.408183	0.469628	0.0600391	-0.288105	0.182642	0.544863	0.655144	0.218017	0.318577	0.484964	0.743245	0.379372	-0.151644	-0.18602	-0.129809	0.592464
852026	RPL12B	YDR418W	S000002826	Ribosomal 60S subunit protein L12B; rpl12a rpl12b double mutant exhibits slow growth and slow translation; homologous to mammalian ribosomal protein L12 and bacterial L11; RPL12B has a paralog, RPL12A, that arose from the whole genome duplication	0.0875122	0.00743054	0.608421	0.104305	0.449907	0.477437	0.336713	0.322082	-0.0260278	0.0437716	0.181983	0.208336	0.141751	0.146671	-0.0120327	-0.591356	-0.83482	-0.479486	-0.659859	-0.218364	0.464617	-0.412675	0.191365	-0.616299	-0.729645	-0.0230036	-0.537671	-0.617294	-0.849478	-0.769412	0.657103	0.148081	0.246327	-0.305101	-0.736534	-0.277388	-0.73798	-0.635375	-0.874369	-0.624155	0.656092	-0.0810347	0.253555	-0.481844	-0.827802
855655	RPL16B	YNL069C	S000005013	Ribosomal 60S subunit protein L16B; N-terminally acetylated, binds 5.8 S rRNA; transcriptionally regulated by Rap1p; homologous to mammalian ribosomal protein L13A and bacterial L13; RPL16B has a paralog, RPL16A, that arose from the whole genome duplication	0.0145892	9.17085e-05	0.671958	0.182289	0.454134	0.656843	0.647029	0.415036	0.314899	0.0814254	0.18161	0.299154	0.29021	0.201861	0.148435	-0.315787	-0.913732	-0.637567	-0.528518	-0.182521	0.840002	-0.300403	-0.186857	-0.486008	-0.693499	0.226867	-0.450792	-0.529629	-0.740629	-0.426719	0.797079	0.140361	0.226258	-0.510111	-0.527534	-0.0371532	-0.730611	-0.630833	-0.692658	-0.335408	0.887004	-0.0778062	0.0297992	-0.540743	-0.658848
852254	RPL19B	YBL027W	S000000123	Ribosomal 60S subunit protein L19B; rpl19a and rpl19b single null mutations result in slow growth, while the double null mutation is lethal; homologous to mammalian ribosomal protein L19, no bacterial homolog; RPL19B has a paralog, RPL19A, that arose from the whole genome duplication	0.0698865	0.00177538	0.489904	0.248022	0.282667	0.593413	0.622525	0.125295	0.128805	0.109553	0.111566	0.256562	0.260957	0.0571063	0.0575701	0.123823	-0.668942	-0.330628	-0.243453	-0.0646937	0.969975	-0.402568	-0.135638	-0.243252	-0.33574	0.253275	-0.237927	-0.406441	-0.812486	-0.45008	0.554231	0.244341	0.482425	-0.577642	-0.451882	0.232312	-0.475591	-0.434239	-0.673633	-0.340485	0.833893	-0.0189886	0.269494	-0.511601	-0.467953
854794	RPL2B	YIL018W	S000001280	Ribosomal 60S subunit protein L2B; homologous to mammalian ribosomal protein L2 and bacterial L2; RPL2B has a paralog, RPL2A, that arose from the whole genome duplication; expression is upregulated at low temperatures	0.0109521	0.000583523	0.781763	0.364614	0.421803	0.532288	0.548432	0.262423	0.125314	0.132912	0.142993	0.192866	0.196901	0.103092	0.0493502	-0.105251	-0.760211	-0.677523	-0.740673	-0.387309	0.856349	-0.0526071	0.0278933	-0.549577	-0.720127	-0.0446761	-0.504416	-0.647478	-0.928859	-0.653493	0.593366	0.230642	0.30624	-0.521431	-0.737537	-0.0695451	-0.619197	-0.67915	-0.884613	-0.570489	0.713684	0.127946	0.207783	-0.548468	-0.753593
854229	RPL3	YOR063W	S000005589	Ribosomal 60S subunit protein L3; homologous to mammalian ribosomal protein L3 and bacterial L3; plays an important role in function of eIF5B in stimulating 3' end processing of 18S rRNA in context of 80S ribosomes that have not yet engaged in translation; involved in replication and maintenance of killer double stranded RNA virus	0.0490876	0.000559731	0.510192	0.248936	0.450549	0.66603	0.55299	0.261607	0.0821466	0.133473	0.202881	0.313532	0.25312	0.128939	0.0402485	0.820368	0.198235	0.360849	0.197903	0.301334	0.569618	-0.23338	0.2338	-0.0510049	0.459766	0.6758	0.185397	-0.120857	-0.479936	-0.370576	0.441289	0.396658	0.444929	-0.2365	-0.0500785	0.803917	0.210123	0.0534351	-0.267668	-0.148969	0.53813	0.194096	0.410267	-0.189607	0.142682
852319	RPL4A	YBR031W	S000000235	Ribosomal 60S subunit protein L4A; N-terminally acetylated; homologous to mammalian ribosomal protein L4 and bacterial L4; RPL4A has a paralog, RPL4B, that arose from the whole genome duplication	0.14703	0.000256599	0.655786	0.27145	0.378437	0.738104	0.445506	0.417863	0.187039	0.141194	0.171257	0.356091	0.213611	0.215938	0.0934109	0.325859	-0.39658	-0.122497	-0.25348	0.17095	0.827497	-0.337292	0.156283	-0.49158	-0.106885	0.558388	0.00983221	-0.386547	-0.574067	-0.389707	0.545951	0.531043	0.207537	-0.336437	-0.232104	0.530703	-0.188133	-0.316784	-0.505586	-0.174844	0.768674	0.187039	0.214511	-0.464678	-0.206575
851575	RPL4B	YDR012W	S000002419	Ribosomal 60S subunit protein L4B; homologous to mammalian ribosomal protein L4 and bacterial L4; RPL4B has a paralog, RPL4A, that arose from the whole genome duplication	0.0112146	0.0012265	0.399805	0.354578	0.582899	0.645584	0.283431	0.230609	-0.00892069	0.212707	0.279118	0.338697	0.1401	0.125887	-0.00499863	0.775296	0.259412	0.443014	0.022542	0.0754409	0.447163	-0.266233	0.565852	-0.0469273	0.393174	0.501179	-0.137522	-0.357461	-0.591818	-0.527661	0.675132	0.305631	0.269013	-0.220935	-0.31175	0.676669	0.0225222	-0.04344	-0.385405	-0.319221	0.64818	0.0867693	0.429222	-0.168282	-0.0348815
855972	RPL5	YPL131W	S000006052	Ribosomal 60S subunit protein L5; nascent Rpl5p is bound by specific chaperone Syo1p during translation; homologous to mammalian ribosomal protein L5 and bacterial L18; binds 5S rRNA and is required for 60S subunit assembly	0.0140928	0.000108	0.634481	0.35735	0.541939	0.754213	0.42674	0.367507	0.184996	0.190426	0.250411	0.381651	0.207091	0.200916	0.105102	0.167302	-0.457784	-0.219213	-0.613454	-0.403959	0.746359	-0.284952	0.48186	-0.372006	-0.411512	0.236407	-0.302598	-0.551746	-0.79717	-0.666478	0.619166	0.357486	0.268105	-0.341872	-0.558949	0.22282	-0.381724	-0.452194	-0.770887	-0.601354	0.705667	0.123834	0.368422	-0.37375	-0.533143
851415	RPO21	YDL140C	S000002299	RNA polymerase II largest subunit B220; part of central core; phosphorylation of C-terminal heptapeptide repeat domain regulates association with transcription and splicing factors; similar to bacterial beta-prime	0.0869356	0.00100876	0.517467	0.182026	0.557337	0.555316	0.170025	0.543686	0.119552	0.117151	0.405998	0.367572	0.10738	0.323024	0.0702644	-0.125531	0.507984	0.748341	0.615991	0.62361	-0.768087	-0.36145	0.224831	0.155564	0.638028	0.346662	0.700029	0.604456	0.825126	0.217622	-0.538813	0.0745128	-0.232749	0.826089	0.721086	0.0714274	0.677631	0.80206	0.810793	0.536864	-0.785716	-0.218933	0.0504949	0.488718	0.778403
851052	RPP0	YLR340W	S000004332	Conserved ribosomal protein P0 of the ribosomal stalk; involved in interaction between translational elongation factors and the ribosome; phosphorylated on serine 302; homologous to mammalian ribosomal protein LP0 and bacterial L10	0.02268	0.000180084	0.67023	0.631571	0.361986	0.66204	0.379956	0.258245	0.222622	0.389385	0.17926	0.356467	0.20572	0.153549	0.129791	0.733456	-0.0244882	0.00571771	-0.16219	-0.032391	0.764432	-0.0386465	0.212827	-0.172765	0.103131	0.276354	-0.285577	-0.626755	-0.765505	-0.452382	0.637584	0.47965	0.127416	-0.515914	-0.512034	0.55206	-0.170124	-0.340913	-0.508729	-0.265999	0.767252	0.24219	0.186114	-0.377498	-0.224767
851990	RPP2B	YDR382W	S000002790	Ribosomal protein P2 beta; a component of the ribosomal stalk, which is involved in the interaction between translational elongation factors and the ribosome; free (non-ribosomal) P2 stimulates the phosphorylation of the eIF2 alpha subunit (Sui2p) by Gcn2p; regulates the accumulation of P1 (Rpp1Ap and Rpp1Bp) in the cytoplasm	0.0437664	0.000211728	0.211602	0.490068	0.32025	0.556724	0.873229	0.149082	0.0926812	0.251689	0.168344	0.292827	0.486615	0.0933073	0.0533551	-0.436553	-0.726731	-0.805545	-0.317955	0.122181	0.482697	0.161502	-0.678568	-0.524365	-0.592802	-0.386801	-0.408206	-0.634911	-0.964344	-0.465549	0.129543	0.335479	0.367986	-0.75426	-0.750741	-0.492052	-0.639466	-0.84787	-0.878674	-0.299642	0.316816	0.328668	-0.0260915	-0.811803	-0.840039
853128	RPS0A	YGR214W	S000003446	Ribosomal 40S subunit protein S0A; required for maturation of 18S rRNA along with Rps0Bp; deletion of either RPS0 gene reduces growth rate, deletion of both genes is lethal; homologous to human ribosomal protein SA and bacterial S2; RPS0A has a paralog, RPS0B, that arose from the whole genome duplication;	0.0402022	0.00106782	0.655664	0.125635	0.492249	0.624031	0.344623	0.360153	0.16824	0.0641443	0.223653	0.312411	0.164516	0.191961	0.0909553	-0.162487	-0.657555	-0.340942	-0.698832	-0.361548	0.669262	-0.374327	0.426538	-0.522412	-0.58857	0.328808	-0.296056	-0.485248	-0.722234	-0.588248	0.703293	0.276544	0.262533	-0.325314	-0.479755	0.147068	-0.477356	-0.466235	-0.776057	-0.542988	0.75088	0.0217073	0.356124	-0.438656	-0.568871
854117	RPS15	YOL040C	S000005400	Protein component of the small (40S) ribosomal subunit; homologous to mammalian ribosomal protein S15 and bacterial S19	0.0470706	0.000194218	0.721356	0.237219	0.27127	0.732347	0.434829	0.433824	0.391331	0.111021	0.114364	0.350468	0.199364	0.215048	0.194009	-0.180028	-0.810316	-0.434039	-0.551721	-0.328459	0.84495	-0.442653	0.115553	-0.369419	-0.613993	0.256905	-0.379485	-0.566933	-0.764531	-0.515034	0.73692	0.280605	0.206444	-0.45203	-0.538088	0.0062594	-0.683435	-0.534577	-0.699851	-0.444391	0.870744	-0.147275	0.168039	-0.440858	-0.633939
853610	RPS4A	YJR145C	S000003906	Protein component of the small (40S) ribosomal subunit; mutation affects 20S pre-rRNA processing; homologous to mammalian ribosomal protein S4, no bacterial homolog; RPS4A has a paralog, RPS4B, that arose from the whole genome duplication	0.0160324	0.000532174	0.445931	0.3361	0.407941	0.669141	0.604929	0.15457	0.0996824	0.114208	0.131056	0.224039	0.205128	0.0569717	0.0361492	-0.208877	-0.849179	-0.730766	-0.642316	-0.263666	0.865258	-0.0937102	-0.167953	-0.548807	-0.728756	-0.0381228	-0.411247	-0.693476	-0.950301	-0.5724	0.482068	0.410205	0.271651	-0.629646	-0.712079	-0.102488	-0.599824	-0.758896	-0.910604	-0.504103	0.656236	0.259442	0.133667	-0.64773	-0.771469
852206	RPS8A	YBL072C	S000000168	Protein component of the small (40S) ribosomal subunit; homologous to mammalian ribosomal protein S8, no bacterial homolog; RPS8A has a paralog, RPS8B, that arose from the whole genome duplication	0.0406248	0.000328174	0.405197	0.180124	0.0904929	0.631503	0.689212	0.345064	0.446462	0.0670216	0.030659	0.224949	0.24234	0.130327	0.171796	-0.0125685	-0.730642	-0.626691	-0.641373	-0.531857	0.911628	-0.0834022	-0.0295151	-0.279423	-0.680992	0.462229	0.149862	-0.176855	-0.669062	-0.442853	0.272667	0.426839	0.609027	-0.403451	-0.190862	0.259332	-0.350354	-0.476815	-0.769747	-0.573673	0.702499	0.196548	0.333946	-0.399988	-0.517369
852256	RRN10	YBL025W	S000000121	Protein involved in promoting high level transcription of rDNA; subunit of UAF (upstream activation factor) for RNA polymerase I	0.0176704	0.000949227	0.0705211	-0.341977	0.458654	0.219931	0.546391	0.642648	0.539956	-0.166812	0.243182	0.121499	0.308485	0.319238	0.252263	-0.812057	-0.455241	-0.259254	0.181472	0.305917	-0.236218	-0.228014	-0.577371	-0.0763707	-0.261918	0.368024	0.33332	0.682609	0.943011	0.717462	-0.0535958	-0.494197	-0.277008	0.475362	0.789021	-0.344308	-0.114568	0.239152	0.710246	0.658526	-0.199389	-0.465775	-0.577542	0.239873	0.303007
852232	RRT1	YBL048W	S000000144	Protein of unknown function; identified in a screen for mutants with increased levels of rDNA transcription; dubious open reading frame unlikely to encode a protein, based on experimental and comparative sequence data	0.0454336	0.000720654	0.980498	0.312799	0.308478	0.498796	0.272602	0.380099	0.33144	0.40821	0.409622	0.576042	0.255265	0.373778	0.333597	0.465934	0.769519	0.96338	0.514973	0.311965	-0.50744	-0.319136	0.641114	0.33943	0.806354	0.576078	0.953316	0.86527	0.551148	0.272977	-0.629782	0.0449789	0.463728	0.424177	0.853876	0.531343	0.878495	0.934733	0.544232	0.299058	-0.579876	-0.142858	0.565671	0.389347	0.84758
851071	RSC2	YLR357W	S000004349	Component of the RSC chromatin remodeling complex; required for expression of mid-late sporulation-specific genes; involved in telomere maintenance; RSC2 has a paralog, RSC1, that arose from the whole genome duplication	0.206041	0.0037344	0.104781	0.0170843	0.723337	0.545202	-0.0341253	0.408547	-0.0153865	0.0099909	0.474454	0.367386	-0.0216307	0.24526	-0.0090169	-0.478005	0.102448	0.519413	0.409145	0.497992	-0.607592	-0.567278	0.179334	0.0195398	0.297643	-0.0292673	-0.369783	-0.224544	0.403249	-0.0538477	0.438475	-0.166485	-0.811331	0.563922	-0.0746391	-0.499444	-0.0707479	0.421514	0.606299	0.480454	-0.409954	-0.655011	-0.201393	0.28646	0.267089
856453	RSC30	YHR056C	S000001098	Component of the RSC chromatin remodeling complex; non-essential gene required for regulation of ribosomal protein genes and the cell wall/stress response; null mutants are osmosensitive; RSC30 has a paralog, RSC3, that arose from the whole genome duplication	0.0105048	0.000330203	0.264902	0.030825	0.67239	0.674582	0.303557	0.629928	0.167071	0.0274786	0.543855	0.472469	0.216802	0.420633	0.108316	0.371546	0.808972	0.825481	0.726233	0.752992	-0.651733	-0.0842208	0.188879	0.165627	0.910827	0.898111	0.777768	0.469259	0.521591	0.184943	-0.0856966	0.354231	-0.0301901	0.474823	0.732384	0.776494	0.918196	0.724167	0.708432	0.501116	-0.384943	0.189865	0.0754682	0.394987	0.939804
850720	RSC58	YLR033W	S000004023	Component of the RSC chromatin remodeling complex; RSC functions in transcriptional regulation and elongation, chromosome stability, and establishing sister chromatid cohesion; involved in telomere maintenance	0.0370345	0.00309703	0.265142	0.0758501	0.34696	0.482072	0.0259518	0.759126	0.238706	0.0361653	0.193704	0.251866	0.0134704	0.3665	0.111679	-0.572661	0.0437282	0.333348	0.267453	0.526236	-0.627973	-0.391921	0.108928	-0.187931	0.173358	-0.0572699	0.399486	0.417242	0.837117	0.345661	-0.562584	-0.0544746	-0.49909	0.713218	0.526423	-0.382308	0.273618	0.460034	0.679864	0.532591	-0.72841	-0.271098	-0.242767	0.327376	0.430665
850419	RSC6	YCR052W	S000000648	Component of the RSC chromatin remodeling complex; essential for mitotic growth; RSC6 has a paralog, SNF12, that arose from the whole genome duplication	0.159865	0.000154703	0.612721	0.241814	0.586125	0.614217	0.320805	0.628601	0.201948	0.153568	0.413968	0.454445	0.20491	0.415561	0.121367	-0.347937	0.0582974	0.523521	0.359745	0.640584	-0.421678	-0.628635	0.247331	-0.185538	0.332523	0.0772864	0.31313	0.839006	0.831913	0.502795	-0.318795	-0.729563	0.0733488	0.549501	0.688282	-0.250196	0.136071	0.652283	0.521963	0.646894	-0.422314	-0.703011	0.214893	0.0133426	0.45917
850598	RSC8	YFR037C	S000001933	Component of the RSC chromatin remodeling complex; essential for viability and mitotic growth; homolog of SWI/SNF subunit Swi3p, but unlike Swi3p, does not activate transcription of reporters	0.0730739	0.00168231	0.360715	0.200835	0.458763	0.59888	0.354956	0.449998	-0.0911209	0.103637	0.264217	0.354544	0.196688	0.242532	-0.0452113	-0.340213	0.014782	0.448677	0.562626	0.774145	-0.358911	-0.583265	-0.109708	-0.0624733	0.38543	-0.481942	0.0461535	0.410708	0.636187	0.252462	-0.540322	-0.492643	-0.253697	0.552258	0.25851	-0.389103	0.0223512	0.464588	0.608746	0.703085	-0.417375	-0.595038	-0.146699	0.0669243	0.378733
851638	RTR2	YDR066C	S000002473	Protein of unknown function; exhibits genetic interactions with Rtr1p; green fluorescent protein (GFP)-fusion protein localizes to the cytoplasm; YDR066C is not an essential gene; relocalizes from nucleus to cytoplasmic foci upon DNA replication stress; RTR2 has a paralog, RTR1, that arose from the whole genome duplication	0.0768703	0.00108099	0.0106753	-0.243695	0.119441	0.566664	0.0149813	0.768283	0.91335	-0.152774	0.0713106	0.305832	0.00823437	0.411529	0.490703	-0.112661	0.0356515	0.0251123	-0.665338	-0.565754	-0.157757	0.0114043	0.875286	-0.27584	-0.3145	0.722081	0.847167	0.598212	0.755429	0.523278	-0.34951	0.269005	-0.152965	0.432272	0.889257	0.768314	0.96115	0.678677	0.608917	0.384458	-0.447455	0.305229	0.140314	0.385768	0.883631
852392	RXT2	YBR095C	S000000299	Component of the histone deacetylase Rpd3L complex; possibly involved in cell fusion and invasive growth; relocalizes to the cytosol in response to hypoxia	0.104305	2.90986e-07	0.0482681	0.263672	0.191009	0.782644	0.478048	1.14545	1.0732	0.136637	0.101074	0.397214	0.237424	0.537279	0.497852	-0.374425	-0.480762	0.140456	-0.237653	0.0574526	0.233697	-0.796563	0.489051	-0.358062	-0.226349	0.444282	0.802622	0.755629	0.907355	0.569462	-0.570962	0.0014619	-0.13394	0.578261	0.914441	0.395208	0.758618	0.84955	0.927408	0.629197	-0.564376	-0.180206	-0.0332976	0.543891	0.937654
851721	SAN1	YDR143C	S000002550	Ubiquitin-protein ligase; involved in proteasome-dependent degradation of aberrant nuclear proteins; targets substrates with regions of exposed hydrophobicity containing 5 or more contiguous hydrophobic residues; contains intrinsically disordered regions that contribute to substrate recognition; prefers a window of exposed hydrophobicity that causes a particular level of protein insolubility, sug…	0.0399263	0.0043615	0.79674	0.376608	0.453531	0.468222	0.245052	0.361722	0.0496531	0.210163	0.318744	0.329379	0.163501	0.247632	0.0328641	-0.821003	-0.302689	0.0556079	0.0408074	0.273649	-0.438128	-0.45748	0.0229881	-0.222031	-0.175448	-0.986288	-0.650658	-0.502197	-0.402182	-0.358441	-0.163263	-0.149257	-0.165044	-0.150283	-0.731084	-0.967946	-0.506764	-0.231595	-0.187527	-0.0362486	-0.326934	-0.330294	-0.0735126	-0.200956	-0.47858
856771	SAP1	YER047C	S000000849	Putative ATPase of the AAA family; interacts with the Sin1p transcriptional repressor in the two-hybrid system	0.205742	0.00115006	0.152521	0.0185223	0.682139	0.585948	0.0585258	0.798189	0.31876	0.0102942	0.436442	0.385868	0.0386572	0.513102	0.210754	-0.92455	-0.516276	-0.256994	-0.381136	-0.097162	-0.271507	-0.308249	0.137308	-0.384941	-0.545905	-0.317734	-0.519848	-0.50378	0.0698893	-0.400304	0.339828	0.0183302	-0.764296	0.488707	-0.428381	-0.968532	-0.733843	-0.503394	-0.286046	-0.308594	-0.0402868	-0.252872	-0.313551	-0.0532284	-0.707586
850366	SAT4	YCR008W	S000000601	Ser/Thr protein kinase involved in salt tolerance; funtions in regulation of Trk1p-Trk2p potassium transporter; overexpression affects the Fe-S and lipoamide containing proteins in the mitochondrion; required for lipoylation of Lat1p, Kgd2p and Gcv3p; partially redundant with Hal5p; has similarity to Npr1p; localizes to the cytoplasm and mitochondrion	0.0193758	6.15172e-06	0.11985	0.000668341	0.706749	0.653212	0.319006	0.915719	0.714076	0.000259922	0.301688	0.294632	0.140694	0.424391	0.290446	-0.84809	-0.59798	-0.33287	-0.364293	0.137018	-0.0916983	-0.3098	0.014206	-0.597816	-0.518235	-0.155433	-0.326013	-0.0524947	0.447791	0.745218	0.256945	-0.341949	-0.636845	-0.178802	0.146947	-0.735833	-0.603168	-0.285493	-0.115549	0.39951	0.0271211	-0.379926	-0.23687	-0.545669	-0.35536
856133	SDD4	YPR022C	S000006226	Putative transcription factor, as suggested by computational analysis; green fluorescent protein (GFP)-fusion protein localizes to both the cytoplasm and the nucleus and is induced in response to the DNA-damaging agent MMS; overproduction of a truncation allele suppresses lethality due to expression of the dominant PET9 allele AAC2-A128P	0.157163	0.00521565	0.126849	0.129184	0.613847	0.565314	-0.0180513	0.436773	-0.00732414	0.0895649	0.419693	0.372722	-0.0115433	0.284977	-0.00415602	0.141462	0.512502	0.724562	0.520018	0.830452	-0.506808	-0.323833	0.314326	-0.172675	0.709221	0.760378	0.469641	0.195314	0.549535	0.513065	0.166323	0.332014	-0.433073	0.182049	0.616389	0.469426	0.638777	0.685301	0.682071	0.919849	-0.338569	-0.111433	0.056669	-0.0570897	0.868389
852824	SDS23	YGL056C	S000003024	Protein involved in cell separation during budding; one of two S. cerevisiae homologs (Sds23p and Sds24p) of the S. pombe Sds23 protein, which is implicated in APC/cyclosome regulation; SDS23 has a paralog, SDS24, that arose from the whole genome duplication	0.0152568	2.56336e-08	0.237521	0.253997	0.870639	0.933124	0.665321	0.964674	0.981981	0.102937	0.431025	0.441035	0.317139	0.468583	0.468242	-0.97797	-0.534272	-0.389964	-0.397603	-0.219064	-0.302164	-0.152614	-0.0202594	-0.283869	-0.632606	-0.768249	-0.196106	-0.31656	0.074392	0.178196	-0.520192	0.176652	-0.518809	-0.0840966	-0.255036	-0.975953	-0.473641	-0.391881	-0.293822	-0.125354	-0.376839	-0.0733499	-0.154106	-0.246304	-0.566896
855103	SEC14	YMR079W	S000004684	Phosphatidylinositol/phosphatidylcholine transfer protein; involved in regulating PtdIns, PtdCho, and ceramide metabolism, products of which regulate intracellular transport and UPR; has a role in localization of lipid raft proteins; functionally homologous to mammalian PITPs; SEC14 has a paralog, YKL091C, that arose from the whole genome duplication	0.0163699	0.000104109	0.510862	0.212694	0.637137	0.596736	0.158225	0.641673	0.407887	0.0975506	0.318477	0.337828	0.085354	0.35537	0.214475	-0.854013	-0.71131	-0.289554	-0.366437	-0.0148147	0.0457306	-0.511267	0.0750332	-0.448695	-0.571853	-0.635075	-0.932717	-0.62694	-0.194279	-0.10596	0.54473	-0.338676	-0.595383	-0.139785	-0.656337	-0.841667	-0.886045	-0.473986	-0.325298	-0.0581071	0.279101	-0.484849	-0.224446	-0.353366	-0.669478
850713	SED5	YLR026C	S000004016	cis-Golgi t-SNARE syntaxin; required for vesicular transport between the ER and the Golgi complex; binds at least 9 SNARE proteins	0.198201	2.99172e-05	0.0682749	0.164292	0.322956	0.511115	0.335862	1.21684	0.432221	0.0843566	0.176991	0.293993	0.180889	0.620868	0.213466	-0.56517	-0.413626	0.0206769	-0.0203632	0.521954	-0.0419692	-0.550942	0.0534985	-0.547711	-0.123169	0.172071	0.406818	0.671955	0.908876	0.274037	-0.342518	-0.386933	-0.248125	0.87561	0.657243	-0.220809	0.0861737	0.606377	0.788314	0.585839	-0.329811	-0.704539	-0.183607	0.411308	0.498567
852214	SEF1	YBL066C	S000000162	Putative transcription factor; has homolog in Kluyveromyces lactis	0.765089	0.000226294	0.490374	-0.0735222	0.653388	0.712061	0.208179	0.611514	0.415408	-0.0474772	0.484604	0.494856	0.146849	0.420388	0.287004	-0.870653	-0.257334	-0.00843493	-0.118173	0.0141468	-0.545148	-0.314188	0.138162	-0.163625	-0.293024	0.432612	0.381381	-0.103226	0.384558	0.00237946	-0.0498011	0.620905	-0.624924	0.484053	0.276121	-0.788821	-0.0638036	-0.0793944	0.110588	0.019102	-0.708115	0.0258129	-0.246403	0.120782	-0.178297
856022	SEN54	YPL083C	S000006004	Subunit of the tRNA splicing endonuclease; tRNA splicing endonuclease (Sen complex) is composed of Sen2p, Sen15p, Sen34p, and Sen54p; Sen complex also cleaves the CBP1 mRNA at the mitochondrial surface	0.0945751	0.000173659	0.507149	0.13073	0.413707	0.456879	0.323706	0.89342	0.443925	0.0767142	0.280283	0.326988	0.219245	0.57849	0.255962	-0.707701	-0.401569	-0.0355338	0.0537739	0.49861	-0.199753	-0.460275	-0.115693	-0.43059	-0.152031	-0.115086	0.153589	0.532586	0.896342	0.597382	-0.309362	-0.520264	-0.419254	0.536411	0.550979	-0.519829	-0.176724	0.264714	0.518962	0.645139	-0.296289	-0.578691	-0.30129	0.0113014	0.199312
851587	SES1	YDR023W	S000002430	Cytosolic seryl-tRNA synthetase; class II aminoacyl-tRNA synthetase that aminoacylates tRNA(Ser), displays tRNA-dependent amino acid recognition which enhances discrimination of the serine substrate, interacts with peroxin Pex21p	0.622591	0.0013361	0.645803	0.0356472	0.266261	0.57324	0.375389	0.507813	0.308041	0.0177353	0.141581	0.30004	0.187448	0.257931	0.149074	-0.639719	-0.265109	0.217748	0.164503	0.4753	-0.304379	-0.62748	0.0840585	-0.267219	0.00010087	0.453193	0.951027	0.801932	0.654964	0.491402	-0.749772	0.127059	0.247434	0.337069	0.884205	-0.245233	0.346007	0.644289	0.515555	0.667903	-0.682901	-0.426737	0.212273	-0.0157713	0.518676
853900	SET3	YKR029C	S000001737	Defining member of the SET3 histone deacetylase complex; which is a meiosis-specific repressor of sporulation genes; necessary for efficient transcription by RNAPII; one of two yeast proteins that contains both SET and PHD domains; SET3 has a paralog, SET4, that arose from the whole genome duplication	0.0263365	9.19154e-06	0.0527164	0.0124929	0.483219	0.660603	0.391239	1.12237	0.401051	0.0078793	0.302561	0.4084	0.242235	0.611684	0.20964	-0.199639	0.0936707	0.420999	0.56365	0.896674	-0.318124	-0.446344	-0.148139	-0.183707	0.456799	0.599056	0.652268	0.649641	0.893707	0.362865	-0.226005	-0.0465239	-0.258875	0.767595	0.826833	0.390682	0.571734	0.723621	0.988181	0.71544	-0.332511	-0.247646	-0.279121	0.53452	0.883808
851032	SFH1	YLR321C	S000004313	Component of the RSC chromatin remodeling complex; essential gene required for cell cycle progression and maintenance of proper ploidy; phosphorylated in the G1 phase of the cell cycle; Snf5p paralog; hSNF5 tumor suppressor ortholog	0.0844891	0.00349981	0.541916	0.235613	0.543918	0.608821	0.164771	0.357154	-0.000714451	0.142183	0.321671	0.352171	0.0883541	0.194428	-0.000362217	0.290157	0.601729	0.884489	0.676267	0.772176	-0.470977	-0.425533	0.33125	0.0832411	0.843532	0.933772	0.823466	0.59621	0.556265	0.376332	-0.107839	0.241712	0.096273	0.327294	0.841282	0.566919	0.767059	0.90201	0.726528	0.734542	-0.403343	-0.239912	0.29118	0.184451	0.960353
850657	SFI1	YLL003W	S000003926	Centrin (Cdc31p)-binding protein required for SPB duplication; localizes to the half-bridge of the spindle pole body (SPB); required for progression through G(2)-M transition; phosphorylated by Cdc28p-Clb2p and by Cdc5p; dephosphorylated by Cdc14p; has similarity to Xenopus laevis XCAP-C	0.0114817	0.000235285	0.421314	0.0119142	0.556841	0.489184	0.283675	0.836952	0.524071	0.00557209	0.290008	0.287536	0.165431	0.494981	0.280594	-0.887845	-0.772492	-0.503318	-0.422796	0.00637068	0.089289	-0.301862	-0.140473	-0.54117	-0.669641	-0.524563	-0.762533	-0.374372	0.148857	0.201303	0.439973	-0.462263	-0.690564	-0.0130123	-0.349537	-0.835465	-0.844378	-0.503168	-0.244887	0.0817908	0.232598	-0.392991	-0.365311	-0.391552	-0.612444
851373	SHS1	YDL225W	S000002384	Component of the septin ring that is required for cytokinesis; present at the ends of rod-like septin hetero-oligomers; C-terminal extension is important for recruitment of Bni5p to the mother-bud neck, which in turn is required for Myo1p recruitment and cytokinesis; undergoes sumoylation and phosphorylation during mitosis; protein abundance increases in response to DNA replication stress	0.162199	7.98588e-05	0.149057	0.0226133	0.335712	0.627274	0.295482	0.946101	0.52758	0.0123031	0.203222	0.401695	0.168534	0.542649	0.284026	-0.698531	-0.454915	0.0491262	-0.105418	0.277563	-0.123104	-0.641336	0.199254	-0.410907	-0.232146	0.196702	0.524796	0.79445	0.96448	0.527717	-0.467119	-0.402046	-0.154116	0.692265	0.801751	-0.428548	-0.0361943	0.525049	0.507699	0.541261	-0.382765	-0.750209	0.062232	0.100933	0.308462
851813	SIR4	YDR227W	S000002635	SIR protein involved in assembly of silent chromatin domains; silent information regulator (SIR) along with SIR2 and SIR3; involved in assembly of silent chromatin domains at telomeres and the silent mating-type loci; some alleles of SIR4 prolong lifespan; required for telomere hypercluster formation in quiescent yeast cells	0.805819	0.0025316	0.0143815	-0.28925	1.06491	0.508792	0.143946	0.259853	0.403023	-0.167094	0.597498	0.298644	0.0882613	0.154112	0.225331	-0.83967	-0.173986	0.0364811	0.110726	0.17146	-0.619593	-0.269021	-0.0911147	-0.0314007	-0.152596	0.532548	-0.22317	-0.281155	0.0277246	0.208366	0.814839	0.094918	-0.412278	-0.173296	0.0254189	-0.0447366	-0.509103	-0.384739	0.152696	0.48438	0.599234	-0.12779	-0.709328	-0.291234	-0.11508
853946	SIS2	YKR072C	S000001780	Negative regulatory subunit of protein phosphatase 1 (Ppz1p); involved in coenzyme A biosynthesis; subunit of phosphopantothenoylcysteine decarboxylase (PPCDC: Cab3p, Sis2p, Vhs3p) complex and the CoA-Synthesizing Protein Complex (CoA-SPC: Cab2p, Cab3p, Cab4p, Cab5p, Sis2p and Vhs3p); SIS2 has a paralog, VHS3, that arose from the whole genome duplication	0.734928	5.11724e-05	0.0340144	0.185859	0.557741	0.895244	0.00188053	0.943907	0.307414	0.0958405	0.307347	0.493456	0.000985911	0.511088	0.173092	-0.548359	-0.28782	0.101499	-0.398932	-0.0558763	-0.184293	-0.500242	0.640788	-0.448737	-0.2917	0.0802541	0.0939624	-0.259834	0.0905885	-0.556075	-0.0385999	0.467458	-0.463191	0.670662	-0.128963	-0.680612	-0.303414	-0.128369	-0.46171	-0.655183	-0.29682	-0.211567	0.411797	0.0711606	-0.540271
851513	SIT4	YDL047W	S000002205	Ceramide-activated, type 2A-related serine-threonine phosphatase; functions in G1/S transition of mitotic cycle; controls lifespan, mitochondrial function, cell cycle progression by regulating HXK2 phosphorylation; regulator of COPII coat dephosphorylation; required for ER to Golgi traffic; interacts with Hrr25p kinase; cytoplasmic and nuclear protein that modulates functions mediated by Pkc1p in…	0.114945	6.60736e-05	0.659394	0.137797	0.443619	0.58213	0.454988	0.69666	0.438974	0.0733477	0.252961	0.34028	0.242334	0.382398	0.216125	-0.470927	-0.139272	0.308589	0.240702	0.644513	-0.294761	-0.590181	0.109549	-0.340046	0.156222	0.369057	0.635864	0.895885	0.846109	0.786288	-0.435254	-0.397644	0.131703	0.283965	0.923468	-0.124088	0.224157	0.644761	0.575874	0.809375	-0.407626	-0.581499	0.136608	-0.080946	0.559138
852018	SIZ1	YDR409W	S000002817	SUMO E3 ligase; promotes attachment of small ubiquitin-related modifier sumo (Smt3p) to primarily cytoplasmic proteins; regulates Rsp5p ubiquitin ligase activity and is in turn itself regulated by Rsp5p; required for sumoylation of septins and histone H3 variant Cse4p, a prerequisite for STUbL-mediated Ub-dependent degradation; localizes to the septin ring; acts as an adapter between E2, Ubc9p an…	0.296965	0.000242063	0.100412	-0.0844433	0.580439	0.640296	0.179252	0.829276	0.499813	-0.0482266	0.386226	0.404656	0.109333	0.48085	0.290707	-0.793757	-0.174854	0.131576	-0.0229507	0.129112	-0.572583	-0.397702	0.205558	-0.158142	-0.161115	0.344499	0.571248	0.534156	0.896997	0.322408	-0.378079	0.00593243	-0.417976	0.812213	0.70719	-0.464567	0.232735	0.476951	0.586579	0.331554	-0.758956	-0.345507	-0.102074	0.410416	0.336763
850884	SKG3	YLR187W	S000004177	Protein of unknown function; green fluorescent protein (GFP)-fusion protein localizes to the cell periphery, cytoplasm, bud, and bud neck; potential Cdc28p substrate; similar to Skg4p; relocalizes from bud neck to cytoplasm upon DNA replication stress; SKG3 has a paralog, CAF120, that arose from the whole genome duplication	0.339003	5.39541e-06	0.485033	0.417331	0.822638	0.533549	0.277547	0.959871	0.211919	0.313107	0.548937	0.396254	0.206201	0.629433	0.149027	0.327928	0.284059	0.64829	0.585764	0.889994	-0.031381	-0.510464	0.128833	-0.149055	0.695667	0.330628	-0.143507	-0.00134004	0.339843	-0.293667	0.512151	-0.179725	-0.431669	0.723538	0.0618672	0.446581	-0.0476604	0.22089	0.544285	0.00829945	0.506867	-0.356642	-0.392116	0.680172	0.301014
852659	SKI8	YGL213C	S000003181	Ski complex component and WD-repeat protein; mediates 3'-5' RNA degradation by the cytoplasmic exosome; also required for meiotic double-strand break recombination; null mutants have superkiller phenotype	0.011686	0.00316519	0.292068	0.0536781	0.397153	0.668463	0.270611	0.468117	-0.0536236	0.0295527	0.212859	0.359289	0.136553	0.229854	-0.0238333	0.156523	0.3653	0.728198	0.733227	0.902174	-0.305549	-0.514908	0.0495136	0.0252922	0.747444	0.818756	0.832813	0.71948	0.760066	0.528768	-0.234678	0.08815	0.00386773	0.432649	0.944372	0.476564	0.625422	0.82196	0.84372	0.854597	-0.31454	-0.311671	0.0355445	0.212633	0.93665
852765	SLD3	YGL113W	S000003081	Protein involved in the initiation of DNA replication; required for proper assembly of replication proteins at the origins of replication; interacts with Cdc45p; localizes to nuclear foci that become diffuse upon DNA replication stress; homologous to the human Treslin/Ticrr protein	0.177676	0.000453185	0.355975	-0.023597	0.61455	0.507501	0.243658	0.583113	0.518327	-0.016071	0.380705	0.322046	0.143883	0.361643	0.292179	0.055204	0.355697	0.64529	0.182422	0.583559	-0.394721	-0.415822	0.634999	-0.352811	0.476846	0.90745	0.561805	0.554158	0.565028	0.55796	0.196818	-0.0328475	0.0287697	0.156751	0.793055	0.745877	0.607151	0.732017	0.531365	0.707125	-0.0221152	-0.214111	0.309974	-0.0349956	0.845644
850830	SLS1	YLR139C	S000004129	Mitochondrial membrane protein; coordinates expression of mitochondrially-encoded genes; may facilitate delivery of mRNA to membrane-bound translation machinery	0.912238	0.00339851	0.265902	0.0463449	0.670276	0.656487	0.0760554	0.469179	0.00171601	0.0268269	0.411629	0.392714	0.0470264	0.27707	0.000981103	-0.490688	0.0876368	0.404317	0.382575	0.623132	-0.601541	-0.431595	0.0585247	-0.139209	0.277064	0.256881	-0.0851932	-0.488955	0.0678117	-0.227824	0.364642	0.54824	-0.741777	0.3136	-0.141608	-0.406757	0.0333757	0.0581755	0.584934	0.614831	-0.448975	-0.0358333	-0.661838	0.125058	0.233107
850775	SMC4	YLR086W	S000004076	Subunit of the condensin complex; condensin reorganizes chromosomes during both mitosis and meiosis; forms a subcomplex with Smc2p that has ATP-hydrolyzing and DNA-binding activity, but other condensin subunits are required for chromatin binding; required for tRNA gene clustering at the nucleolus; potential Cdc28p substrate	0.0185043	0.00336313	0.0730822	-0.0314226	0.724739	0.625494	-0.0366186	0.45158	0.172616	-0.0232322	0.451303	0.384807	-0.0225521	0.261523	0.0948667	0.471972	0.735982	0.922581	0.70189	0.723075	-0.458979	-0.306821	0.349944	0.164753	0.927775	0.880344	0.469672	0.259485	0.501032	0.308141	0.286251	0.245958	-0.285625	0.325619	0.603258	0.865404	0.71222	0.660452	0.716709	0.59156	-0.0354906	0.0148052	-0.020484	0.315013	0.905718
854123	SMC5	YOL034W	S000005394	Subunit of the SMC5-SMC6 complex; the SMC5-SMC6 complex plays a key role in the removal of X-shaped DNA structures that arise between sister chromatids during DNA replication and repair; binds single-stranded DNA and has ATPase activity; supports nucleolar function; S. pombe homolog forms a heterodimer with S. pombe Rad18p that is involved in DNA repair	0.606978	0.0097034	0.558648	0.0106287	0.424633	0.388302	-0.00748142	0.485972	0.36206	0.00726235	0.273577	0.297067	-0.00509949	0.344093	0.245512	-0.442358	-0.534616	0.0408663	-0.338628	-0.00206386	0.233883	-0.731069	0.483162	-0.42627	-0.326054	0.373351	-0.302018	0.0678614	0.377399	0.277568	0.755376	-0.473071	-0.386331	0.199809	0.182717	-0.0855366	-0.581487	0.0728698	-0.00733855	0.17468	0.649992	-0.833294	0.107048	-0.183962	-0.121745
855757	SNF12	YNR023W	S000005306	73 kDa subunit of the SWI/SNF chromatin remodeling complex; involved in transcriptional regulation; relocates to the cytosol under hypoxic conditions; deletion mutants are temperature-sensitive; SNF12 has a paralog, RSC6, that arose from the whole genome duplication	0.0259685	0.00260875	0.196525	-0.0123075	0.74284	0.407943	0.0713239	0.437539	0.319857	-0.00659666	0.408298	0.261304	0.0460407	0.277471	0.180453	-0.842616	-0.649812	-0.271175	-0.157193	0.241681	-0.0206622	-0.458134	-0.164985	-0.440516	-0.433281	-0.146105	-0.726029	-0.476151	0.00501117	0.212784	0.772257	-0.279538	-0.645162	-0.206445	-0.323872	-0.578012	-0.822409	-0.449544	-0.0880148	0.270721	0.462263	-0.437148	-0.491796	-0.382052	-0.44997
856360	SNF6	YHL025W	S000001017	Subunit of the SWI/SNF chromatin remodeling complex; involved in transcriptional regulation; functions interdependently in transcriptional activation with Snf2p and Snf5p; relocates to the cytosol under hypoxic conditions	0.070931	9.73922e-05	0.758254	0.305736	0.57941	0.740339	0.368586	0.293411	0.460016	0.144852	0.264864	0.330663	0.166836	0.136445	0.186392	0.26573	0.463059	0.67731	0.683591	0.955264	-0.319999	-0.322978	0.0440258	-0.0905831	0.781244	0.539549	0.416277	0.123677	0.257433	0.754485	0.012996	0.360623	-0.1597	-0.428855	0.504552	0.461275	0.480781	0.40408	0.489587	0.927536	-0.146871	0.0660158	-0.0771536	-0.308253	0.689213
850484	SNO3	YFL060C	S000001834	Protein of unknown function; nearly identical to Sno2p; expression is induced before the diauxic shift and also in the absence of thiamin	0.0494152	0.00998666	0.622091	0.111257	0.331165	-0.00523916	0.197694	0.591887	0.424414	0.0988572	0.251453	-0.00564374	0.182248	0.486197	0.348663	-0.163131	-0.757046	-0.209881	-0.0576879	0.103231	0.794465	-0.67601	-0.208615	-0.176201	-0.299406	0.201688	-0.200612	0.391715	0.593575	0.298036	0.455443	-0.779297	-0.225279	0.452784	0.332199	0.0936497	-0.400178	0.217604	0.416692	0.253373	0.59984	-0.798137	-0.235132	0.273706	0.143993
854749	SNP1	YIL061C	S000001323	Component of U1 snRNP required for mRNA splicing via spliceosome; substrate of the arginine methyltransferase Hmt1p; may interact with poly(A) polymerase to regulate polyadenylation; homolog of human U1 70K protein; protein abundance increases in response to DNA replication stress	0.498238	2.90962e-07	0.0624022	0.323804	0.268927	0.748935	0.487398	1.1766	0.844916	0.185653	0.169923	0.469683	0.286215	0.668811	0.478391	-0.72128	-0.608086	-0.110041	-0.334325	0.0395184	0.0478952	-0.621539	0.275256	-0.46241	-0.44112	0.179315	0.665761	0.74262	0.890084	0.398372	-0.662813	-0.1542	-0.129548	0.727505	0.772933	-0.239159	0.333938	0.707934	0.729011	0.43794	-0.66156	-0.527391	0.0276587	0.484194	0.544041
9164913	SNR38	snR38	S000007301	C/D box small nucleolar RNA (snoRNA); guides 2'-O-methylation of large subunit (LSU) rRNA at position G2815	0.334826	7.79959e-05	0.153775	0.589514	0.688069	0.679084	0.55663	0.280955	-0.109963	1.07076	2.37868	1.5	1.49348	0.725271	-0.20854	-0.215137	0.303704	0.394123	0.644618	0.831411	-0.599296	-0.144612	-0.286613	-0.0160263	0.511631	-0.68315	-0.466063	-0.790381	-0.789759	-0.505162	-0.0936221	0.47088	-0.0614324	-0.493813	-0.83735	-0.6605	-0.0493815	-0.191445	0.0320925	0.393799	-0.598037	0.194387	-0.297445	-0.353205	-0.119021
850399	SNT1	YCR033W	S000000629	Subunit of the Set3C deacetylase complex; interacts directly with the Set3C subunit, Sif2p; putative DNA-binding protein; mutant has increased aneuploidy tolerance; relocalizes to the cytosol in response to hypoxia	0.372192	0.00298356	0.199253	-0.0607825	0.744589	0.448768	0.102638	0.509945	0.171144	-0.035774	0.470572	0.280103	0.0629342	0.298305	0.094362	-0.473977	0.182218	0.436104	0.391904	0.58138	-0.704467	-0.354605	0.0893715	-0.0856565	0.309588	0.538029	0.168346	0.250888	0.735535	0.419574	0.325086	-0.123658	-0.593785	0.510813	0.531913	-0.129321	0.276228	0.569323	0.819567	0.81036	-0.478725	-0.414423	-0.272852	0.226319	0.617764
851250	SPC72	YAL047C	S000000045	Gamma-tubulin small complex (gamma-TuSC) receptor; recruits the gamma-TuSC complex to the cytoplasmic side of the SPB, connecting nuclear microtubules to the SPB; involved in astral microtubule formation, stabilization, and with Stu2p, anchoring astral MTs at the cytoplasmic face of the SPB, and regulating plus-end MT dynamics; regulated by Cdc5 kinase	0.0352542	1.7592e-05	0.758021	0.194739	0.62749	0.423405	0.473197	0.848309	0.569219	0.14148	0.384231	0.289485	0.310006	0.51625	0.311162	0.382102	0.237724	0.476775	0.622587	0.94172	0.0814023	-0.338961	-0.147857	-0.154203	0.665935	0.710405	0.39984	0.628488	0.790473	0.586984	0.204643	-0.337443	-0.156673	0.412895	0.795674	0.629395	0.362742	0.608834	0.77435	0.754751	0.170558	-0.357999	-0.162648	0.224733	0.794161
853651	SPE1	YKL184W	S000001667	Ornithine decarboxylase; catalyzes the first step in polyamine biosynthesis; degraded in a proteasome-dependent manner in the presence of excess polyamines; deletion decreases lifespan, and increases necrotic cell death and ROS generation	0.362916	0.00244433	0.295861	-0.026895	0.590032	0.565697	0.241572	0.441055	0.0626623	-0.0118076	0.28257	0.26792	0.114906	0.217714	0.0284389	-0.743551	-0.270032	-0.0220548	-0.00106928	0.439445	-0.401985	-0.311977	-0.0282371	-0.440797	-0.14765	-0.195307	-0.52079	-0.929339	-0.580597	-0.181509	0.463446	0.588086	-0.512435	-0.552894	-0.658323	-0.7762	-0.425091	-0.317011	-0.185846	0.364218	-0.238498	-0.112387	-0.190237	-0.599296	-0.351348
854105	SPE2	YOL052C	S000005412	S-adenosylmethionine decarboxylase; required for the biosynthesis of spermidine and spermine; cells lacking Spe2p require spermine or spermidine for growth in the presence of oxygen but not when grown anaerobically	0.148112	5.27361e-06	0.374293	0.171023	0.487801	0.960533	0.581615	0.583804	0.504773	0.0828272	0.258035	0.480179	0.283235	0.324944	0.267004	-0.816827	-0.537339	-0.301381	-0.567367	-0.155762	-0.137141	-0.275341	0.313323	-0.561907	-0.6054	0.0813049	0.304178	-0.27801	-0.630807	-0.280155	-0.303453	0.757748	0.424925	-0.51776	-0.214944	-0.498729	-0.172519	-0.375144	-0.772899	-0.27857	-0.280508	0.285088	0.474339	-0.699078	-0.540412
851681	SPO71	YDR104C	S000002511	Meiosis-specific protein required for prospore membrane morphogenesis; localizes to the prospore membrane (PSM) during sporulation; required for PSM elongation and closure; genetically antagonistic to SPO1; recruits Vps13p to the PSM during sporulation; interacts and functions cooperatively with Spo73p; mutants have defects in the PSM, aberrant spore wall formation and reduced PtdIns-phosphate po…	0.0147146	0.00121757	0.244672	0.010212	0.381668	0.614483	0.157382	0.7268	0.367293	0.00556659	0.248222	0.384084	0.104973	0.433822	0.200991	-0.784477	-0.350947	-0.0516241	0.138038	0.443345	-0.340561	-0.374655	-0.243867	-0.268739	-0.148324	-0.126411	0.206766	0.137553	0.747482	0.500628	-0.387952	0.0769944	-0.760951	0.44487	0.38533	-0.57318	-0.112244	0.0421504	0.49795	0.558925	-0.431201	-0.19853	-0.573312	0.070937	0.115695
852705	SPO74	YGL170C	S000003138	Component of the meiotic outer plaque of the spindle pole body; involved in modifying the meiotic outer plaque that is required prior to prospore membrane formation	0.0183481	3.40731e-06	0.339003	0.715431	1.05282	0.579968	0.550804	1.38674	0.917022	0.432474	0.560569	0.286932	0.352076	0.975392	0.439804	0.115224	0.0319818	-0.37338	-0.257396	0.47135	0.0747702	0.541396	-0.175359	-0.796932	-0.0435337	0.345446	0.00245847	-0.198014	0.297106	0.640192	0.342336	0.268773	-0.641476	-0.26438	0.239799	0.237764	0.0202346	-0.319164	-0.00763652	0.594041	0.212169	0.453799	-0.418544	-0.603701	0.0915506
855965	SPP1	YPL138C	S000006059	Subunit of COMPASS (Set1C); a complex which methylates histone H3 on lysine 4 and is required in telomeric transcriptional silencing; promotes meiotic DSB formation by interacting with H3K4me3 and Rec107p, a protein required for Spo11p-catalyzed DSB formation located on chromosome axes; interacts with Orc2p; PHD finger domain protein similar to human CGBP, an unmethylated CpG binding protein; rel…	0.149621	0.00230177	0.340968	-0.00134715	0.314026	0.578356	0.0471721	0.552091	0.565873	-0.000672262	0.156647	0.331076	0.0264278	0.291524	0.283056	-0.674405	-0.800617	-0.199002	-0.156445	0.0596057	0.338304	-0.745719	-0.0691009	-0.257495	-0.456596	0.085742	-0.172541	0.0268244	0.652029	0.60386	0.303991	-0.254238	-0.78877	0.220898	0.290688	-0.399785	-0.641264	-0.117042	0.291296	0.406795	0.411356	-0.654113	-0.525493	-0.0383309	-0.129337
850744	SPT8	YLR055C	S000004045	Subunit of the SAGA transcriptional regulatory complex; not present in SAGA-like complex SLIK/SALSA; required for SAGA-mediated inhibition at some promoters	0.245705	0.000131933	0.109461	-0.0907424	0.786263	0.553268	0.17638	0.675277	0.500304	-0.0463762	0.43643	0.29682	0.0894569	0.340061	0.238722	-0.534813	0.162918	0.415521	0.192472	0.359771	-0.74089	-0.351403	0.31402	-0.116311	0.181552	0.670018	0.572212	0.65166	0.896771	0.652474	-0.0537799	-0.150496	-0.260042	0.481861	0.884856	-0.0249882	0.510484	0.778743	0.746086	0.731423	-0.670704	-0.399077	0.101061	0.212309	0.728996
850442	SRB8	YCR081W	S000000677	Subunit of the RNA polymerase II mediator complex; associates with core polymerase subunits to form the RNA polymerase II holoenzyme; essential for transcriptional regulation; involved in glucose repression	0.361312	0.00207233	0.214857	-0.186865	0.524999	0.462667	0.113336	0.631077	0.248639	-0.143245	0.462478	0.362026	0.0913033	0.467409	0.170505	-0.541208	0.145116	0.303195	0.3062	0.551843	-0.724768	-0.223219	0.0194623	-0.164527	0.215662	0.560997	0.652383	0.508017	0.872745	0.492374	-0.264209	0.14363	-0.422369	0.611571	0.799571	-0.026532	0.540244	0.560938	0.805364	0.7339	-0.709893	-0.0692165	-0.266137	0.284814	0.690009
851423	SRF1	YDL133W	S000002291	Regulator of phospholipase D (Spo14p); interacts with Spo14p and regulates its catalytic activity; capable of buffering the toxicity of C16:0 platelet activating factor, a lipid that accumulates intraneuronally in Alzheimer's patients	0.347915	0.000423342	0.0565823	-0.275641	0.613624	0.560564	0.251594	0.73579	0.429584	-0.129872	0.305445	0.258736	0.128014	0.350309	0.197521	-0.83773	-0.259441	-0.28594	-0.0943752	0.221849	-0.50956	0.0554582	-0.264252	-0.341225	-0.315773	0.637671	0.502481	0.145654	0.594309	0.314452	0.00207781	0.440178	-0.556333	0.437296	0.553156	-0.166704	0.222297	-0.121566	0.450463	0.478227	-0.44789	0.444283	-0.732892	0.0915677	0.218088
850771	SRL2	YLR082C	S000004072	Protein of unknown function; overexpression suppresses the lethality caused by a rad53 null mutation	0.0329881	0.00354981	0.377156	-0.0973142	0.543588	0.140644	0.292187	0.545468	0.23388	-0.0590562	0.309543	0.0927176	0.179675	0.303676	0.122552	-0.254579	-0.0755563	0.350994	0.642384	0.819895	-0.159007	-0.566479	-0.341651	-0.00733652	0.382582	0.485197	0.0974912	0.543806	0.731311	0.460913	0.361879	-0.606274	-0.195451	0.46413	0.594439	0.221108	0.033392	0.535571	0.797278	0.690171	0.17887	-0.676306	-0.289943	0.318315	0.584943
855833	SRP68	YPL243W	S000006164	Core component of the signal recognition particle (SRP) complex; SRP complex functions in targeting nascent secretory proteins to the endoplasmic reticulum (ER) membrane; relocalizes from cytoplasm to the nuclear periphery upon DNA replication stress	0.0161945	0.00781191	0.396719	-0.0664454	0.518305	0.498271	0.325491	0.321992	0.0434242	-0.0305898	0.297647	0.279804	0.177034	0.171872	0.0223038	-0.83499	-0.272076	0.0372107	0.159879	0.278498	-0.490838	-0.394075	-0.152309	-0.0762651	-0.141512	-0.971109	-0.466472	-0.300557	-0.145292	-0.168679	-0.381063	-0.186807	-0.219458	-0.015103	-0.505579	-0.890277	-0.329645	-0.050966	0.083146	0.167086	-0.473306	-0.348594	-0.17355	-0.061914	-0.240775
852203	SSA3	YBL075C	S000000171	ATPase involved in protein folding and the response to stress; plays a role in SRP-dependent cotranslational protein-membrane targeting and translocation; member of the heat shock protein 70 (HSP70) family; localized to the cytoplasm; SSA3 has a paralog, SSA4, that arose from the whole genome duplication	0.116731	3.62146e-06	0.212277	0.103474	0.533479	0.722704	0.363512	0.996038	0.834242	0.0508831	0.248387	0.360288	0.168669	0.474671	0.35856	-0.255655	-0.31462	0.172267	-0.121057	0.452241	0.142312	-0.629087	0.384246	-0.605367	-0.026925	0.702741	0.562521	0.674113	0.833089	0.740592	-0.00879843	-0.192879	-0.149365	0.313191	0.897546	0.433307	0.285776	0.647504	0.614757	0.857398	0.0718257	-0.507236	0.0911048	-0.0797858	0.719796
853790	STB6	YKL072W	S000001555	Protein that binds Sin3p in a two-hybrid assay; STB6 has a paralog, STB2, that arose from the whole genome duplication	0.0102724	5.30792e-05	0.486122	0.132596	0.681454	0.472129	0.428097	0.732	0.497036	0.0908448	0.463545	0.299647	0.253503	0.403312	0.264757	0.21477	0.7444	0.853872	0.760009	0.690366	-0.72683	-0.203989	0.184245	0.270978	0.862761	0.715279	0.752914	0.843017	0.863952	0.517639	-0.23709	-0.178657	0.0382026	0.575184	0.962152	0.539243	0.802948	0.908296	0.878609	0.633118	-0.476415	-0.202948	0.107244	0.478245	0.985906
851905	SUM1	YDR310C	S000002718	Transcriptional repressor that regulates middle-sporulation genes; required for mitotic repression of middle sporulation-specific genes; also acts as general replication initiation factor; involved in telomere maintenance, chromatin silencing; regulated by pachytene checkpoint	0.0219936	0.00230049	0.524542	-0.0446599	0.514012	0.457276	0.168542	0.460883	0.261269	-0.0239664	0.355217	0.309005	0.105948	0.296366	0.163541	-0.887131	-0.322835	-0.0333347	-0.117094	0.0481859	-0.478774	-0.363634	0.103391	-0.1963	-0.314264	-0.913789	-0.410872	-0.145595	0.0734234	-0.046017	-0.394073	-0.324381	-0.28821	0.138891	-0.345217	-0.916098	-0.355192	-0.0654083	-0.0668791	0.0231208	-0.466811	-0.361532	-0.00315835	-0.107717	-0.330516
851222	SWC3	YAL011W	S000000009	Protein of unknown function; component of the SWR1 complex, which exchanges histone variant H2AZ (Htz1p) for chromatin-bound histone H2A; required for formation of nuclear-associated array of smooth endoplasmic reticulum known as karmellae	0.0607439	0.00493132	0.261284	-0.0823583	0.501966	0.606849	0.0911205	0.659988	0.286912	-0.0445762	0.306594	0.399327	0.0588857	0.415669	0.16817	-0.856675	-0.566597	-0.155303	-0.14436	0.20091	-0.13998	-0.508334	-0.0257591	-0.383512	-0.384811	-0.274843	-0.427212	-0.306747	0.420711	0.215244	0.265542	-0.12884	-0.943707	0.316918	-0.104606	-0.83566	-0.652718	-0.256196	0.0495061	0.257431	-0.0100295	-0.481908	-0.406344	-0.19481	-0.367689
854337	SWT1	YOR166C	S000005692	RNA endoribonuclease involved in perinuclear mRNP quality control; involved in perinuclear mRNP quality control via the turnover of aberrant, unprocessed pre-mRNAs; interacts with subunits of THO/TREX, TREX-2, and RNA polymerase II; contains a PIN (PilT N terminus) domain	0.130453	7.52546e-05	0.249779	-0.0592876	0.653365	0.522359	0.426935	0.766343	0.470508	-0.029111	0.366858	0.297366	0.245134	0.430149	0.256673	-0.969363	-0.563051	-0.371951	-0.25757	0.0183165	-0.257154	-0.213185	-0.173221	-0.344119	-0.542944	-0.224926	-0.361304	-0.0667689	0.544219	0.100927	0.232091	-0.367437	-0.777969	0.587461	0.00388281	-0.955764	-0.619614	-0.361273	-0.0851591	0.0450782	-0.172008	-0.299058	-0.376979	-0.152797	-0.499034
854764	SYG1	YIL047C	S000001309	Plasma membrane protein of unknown function; truncation and overexpression suppresses lethality of G-alpha protein deficiency	0.0648923	7.36792e-05	0.0716969	-0.0660162	0.911909	0.805896	0.36042	0.227217	0.444842	-0.0293433	0.405635	0.366184	0.173275	0.115272	0.219246	-0.977812	-0.684179	-0.527488	-0.499169	-0.340384	-0.112387	-0.157726	-0.0762951	-0.29102	-0.768722	0.154619	-0.432392	-0.772762	-0.659857	-0.251801	0.701557	0.489831	-0.202109	-0.582859	-0.548937	-0.456692	-0.763226	-0.949062	-0.839495	-0.409817	0.508721	0.307888	-0.211415	-0.652069	-0.909338
855999	SYH1	YPL105C	S000006026	Protein of unknown function that influences nuclear pore distribution; co-purifies with ribosomes; contains a GYF domain, which bind proline-rich sequences; deletion extends chronological lifespan; SYH1 has a paralog, SMY2, that arose from the whole genome duplication	0.235228	0.00584649	0.436477	0.0644256	0.628181	0.466194	0.134174	0.380102	0.0815557	0.035675	0.402211	0.307326	0.0846751	0.238165	0.0498178	-0.794141	-0.236711	0.130168	0.0918645	0.26987	-0.494722	-0.474058	0.0584384	-0.15367	-0.116277	-0.688262	-0.890685	-0.659124	-0.238401	-0.363301	0.438375	-0.24233	-0.582751	0.0617441	-0.734099	-0.924908	-0.540178	-0.146223	-0.0157047	0.0839034	-0.24163	-0.487099	-0.176313	-0.103769	-0.37977
853191	TAF1	YGR274C	S000003506	TFIID subunit, involved in RNA pol II transcription initiation; possesses in vitro histone acetyltransferase activity but its role in vivo appears to be minor; involved in promoter binding and G1/S progression; relocalizes to the cytosol in response to hypoxia	0.0536819	0.00620574	0.159353	-0.226685	0.557995	0.662641	0.0981567	0.455459	0.185863	-0.119183	0.348436	0.421378	0.0598426	0.264777	0.0993093	-0.742264	-0.249957	0.176968	0.213334	0.383478	-0.42609	-0.5536	-0.0324211	-0.11363	-0.0365916	-0.0115522	0.0777428	0.110655	0.765439	0.633379	-0.10989	-0.0501212	-0.819754	0.334834	0.40083	-0.646344	-0.191323	0.188905	0.431608	0.536311	-0.404337	-0.49545	-0.292502	0.00963426	0.0976192
851723	TAF12	YDR145W	S000002552	Subunit (61/68 kDa) of TFIID and SAGA complexes; involved in RNA polymerase II transcription initiation and in chromatin modification, similar to histone H2A; overexpression of the human ortholog, TAF12, an oncogene involved in the formation of choroid plexus carcinomas, results in dosage chromosomal instability (dCIN) in a human cell line similar to the dCIN observed in yeast overexpressors	0.351619	0.00352066	0.0892448	-0.0972159	0.336105	0.616859	0.0105469	0.809076	0.180963	-0.0582631	0.218284	0.393364	0.00613076	0.462031	0.104708	-0.453709	-0.020743	0.446777	0.0794168	0.338298	-0.427471	-0.625652	0.498959	-0.237843	0.121814	0.461371	0.666563	0.586648	0.754729	0.0563438	-0.381772	0.0560715	-0.167593	0.898321	0.677042	-0.00729795	0.535131	0.870748	0.694375	0.337566	-0.684191	-0.491338	0.289908	0.540757	0.666375
856096	TAF3	YPL011C	S000005932	TFIID subunit (47 kDa); involved in promoter binding and RNA polymerase II transcription initiation	0.535416	3.28946e-05	0.0271522	-0.0714544	0.635137	0.624905	0.0835549	1.08887	0.518018	-0.0308565	0.27883	0.286195	0.0347332	0.459656	0.221349	-0.532003	-0.214468	0.186616	-0.304983	0.0282218	-0.26072	-0.521654	0.636148	-0.413998	-0.198681	0.605316	0.437361	0.59752	0.763472	0.111426	0.0520933	-0.248435	-0.164067	0.854298	0.662803	0.0376733	0.212055	0.811424	0.445662	0.144159	-0.230558	-0.820409	0.524917	0.419563	0.458787
852497	TAF5	YBR198C	S000000402	Subunit (90 kDa) of TFIID and SAGA complexes; involved in RNA polymerase II transcription initiation and in chromatin modification	0.035142	0.000929041	0.196122	0.0887195	0.514824	0.782397	0.0943923	0.583788	0.0778036	0.0482264	0.352721	0.516204	0.0597261	0.353086	0.0438198	-0.621685	-0.100752	0.317756	0.288033	0.492309	-0.494243	-0.553756	0.0619778	-0.127973	0.116492	-0.461317	0.0598537	-0.0641559	0.468293	0.16031	-0.537026	0.161784	-0.678423	0.43204	0.0613143	-0.669552	-0.0569053	0.22724	0.407794	0.451627	-0.597572	-0.376855	-0.210949	0.0641958	0.115829
854926	TAF8	YML114C	S000004582	TFIID subunit (65 kDa); involved in RNA polymerase II transcription initiation	0.389068	0.000388111	0.221825	-0.0472905	0.62967	0.629758	0.335952	0.565235	0.172569	-0.0256151	0.371345	0.382401	0.198185	0.341885	0.0944123	-0.72957	-0.326642	0.0285638	0.072298	0.46808	-0.316398	-0.451495	-0.0531282	-0.37663	-0.118905	0.427437	-0.233734	-0.314004	0.156997	0.292558	0.72309	0.125628	-0.619868	-0.0939702	0.0440035	-0.666017	-0.399192	-0.0445552	0.113367	0.561975	-0.161074	-0.445166	-0.203176	-0.418577	-0.114644
855276	TAF9	YMR236W	S000004849	Subunit (17 kDa) of TFIID and SAGA complexes; involved in RNA polymerase II transcription initiation and in chromatin modification, similar to histone H3	0.017587	0.00702488	0.954043	0.29314	0.132639	0.326592	0.141513	0.39733	0.359821	0.154809	0.0735766	0.184048	0.0755866	0.197738	0.165375	0.126727	0.308406	0.746881	0.804499	0.842039	-0.263379	-0.61194	-0.0155744	0.175581	0.737258	0.0602088	0.422344	0.665985	0.920571	0.7958	-0.474019	-0.359285	-0.270928	0.36864	0.752457	0.0907536	0.382076	0.716726	0.890793	0.834324	-0.392538	-0.478297	-0.165185	0.292451	0.763049
852937	TAM41	YGR046W	S000003278	Mitochondrial phosphatidate cytidylyltransferase (CDP-DAG synthase); required for cardiolipin biosynthesis; viability of null mutant is strain-dependent; mRNA is targeted to the bud; mutant displays defect in mitochondrial protein import, likely due to altered membrane lipid composition	0.0107808	1.84732e-05	0.0302265	-0.0677124	0.72299	0.581943	0.198858	1.07878	0.479657	-0.0334797	0.427553	0.336688	0.114629	0.561171	0.235233	-0.766303	-0.197331	0.0672148	0.113877	0.401473	-0.516697	-0.339784	-0.0538655	-0.257429	-0.0829694	0.0988519	0.247955	0.424388	0.922709	0.441705	-0.214789	-0.255735	-0.597769	0.72544	0.565341	-0.493638	0.00844967	0.307156	0.644504	0.559302	-0.504326	-0.401405	-0.403147	0.255938	0.284488
852415	TEF2	YBR118W	S000000322	Translational elongation factor EF-1 alpha; in the GTP-bound active form, binds to and delivers aminoacylated tRNA to the A-site of ribosomes for elongation of nascent polypeptides; associates with vacuolar Rho1p GTPase; TEF2-RFP levels increase during replicative aging; may also have a role in tRNA re-export from the nucleus; TEF2 has a paralog, TEF1, that arose from the whole genome duplication	0.41138	0.000894652	0.474471	0.253418	0.434258	0.645858	0.452074	0.392751	-0.0207571	0.135375	0.238732	0.3393	0.229819	0.196333	-0.0101688	0.0974284	0.472194	0.775866	0.81805	0.8402	-0.499854	-0.443651	0.0061738	0.19456	0.787899	0.594239	0.881402	0.506202	0.230476	-0.165024	-0.520656	0.435754	0.387609	0.456555	0.548771	0.380447	0.836903	0.900498	0.796673	0.615836	-0.67816	-0.149537	0.200424	0.391884	0.931955
853781	TEF4	YKL081W	S000001564	Gamma subunit of translational elongation factor eEF1B; stimulates the binding of aminoacyl-tRNA (AA-tRNA) to ribosomes by releasing eEF1A (Tef1p/Tef2p) from the ribosomal complex	0.0277909	0.000164706	0.682458	0.40886	0.567807	0.661085	0.416797	0.353637	0.130157	0.23348	0.290668	0.374197	0.232445	0.228811	0.0794055	-0.0601844	-0.614411	-0.409298	-0.617579	-0.022266	0.716991	-0.228044	0.232052	-0.758916	-0.477884	-0.0101591	-0.551299	-0.73877	-0.88368	-0.54155	0.687185	0.29382	0.126612	-0.576226	-0.732774	-0.0306197	-0.611008	-0.65473	-0.833871	-0.369888	0.742252	0.105541	0.17636	-0.684884	-0.677908
855595	TEP1	YNL128W	S000005072	PTEN homolog with no demonstrated inositol lipid phosphatase activity; plays a role in normal sporulation; homolog of human tumor suppressor gene PTEN/MMAC1/TEP1 and fission yeast ptn1	0.269921	0.000917742	0.0781462	0.403708	0.110199	-0.104798	0.0265808	0.995499	0.771252	0.349816	0.111985	-0.113093	0.0316416	0.993037	0.618863	-0.440282	-0.464988	-0.599371	-0.389229	0.353504	0.147886	0.215972	-0.3118	-0.845845	-0.4302	-0.236276	0.00675719	0.359697	0.813286	0.641051	-0.244823	-0.474037	-0.54615	0.387684	0.419991	-0.388597	-0.17794	0.0889891	0.583592	0.721387	-0.163519	-0.34447	-0.6188	0.016805	0.210645
851964	TFC6	YDR362C	S000002770	Subunit of RNA polymerase III transcription initiation factor complex; one of six subunits of RNA polymerase III transcription initiation factor complex (TFIIIC); part of TFIIIC TauB domain that binds BoxB promoter sites of tRNA and other genes; cooperates with Tfc3p in DNA binding; human homolog is TFIIIC-110	0.0102504	0.000213271	0.436741	0.0458239	0.557279	0.659488	0.289368	0.534994	0.595872	0.0227465	0.313619	0.416653	0.180657	0.304569	0.298508	-0.782849	-0.536352	-0.0622136	0.166539	0.343613	-0.104412	-0.594969	-0.294126	-0.132955	-0.216141	-0.230128	-0.245003	0.0341163	0.580502	0.734929	0.0797792	-0.35568	-0.688511	-0.00064615	0.212751	-0.587158	-0.443523	-0.0219135	0.375932	0.557089	-0.0261412	-0.531617	-0.504921	-0.0815678	-0.031634
854248	TGL5	YOR081C	S000005607	Bifunctional triacylglycerol lipase and LPA acyltransferase; lipid particle-localized triacylglycerol (TAG) lipase involved in triacylglycerol mobilization; catalyzes acylation of lysophosphatidic acid (LPA); potential Cdc28p substrate; TGL5 has a paralog, TGL4, that arose from the whole genome duplication	0.0139405	0.000785211	0.3773	0.144168	0.629097	0.38843	0.0520104	0.654007	0.427719	0.11294	0.472864	0.364329	0.0454946	0.520088	0.282139	-0.289806	-0.192353	0.308861	0.361681	0.764837	-0.0464962	-0.657691	-0.0431136	-0.307342	0.240825	0.184177	-0.152353	0.210065	0.683728	0.638506	0.376889	-0.474544	-0.583024	0.226349	0.387698	-0.0189358	-0.190446	0.283407	0.615432	0.778449	0.221962	-0.621127	-0.398237	1.76624e-05	0.36602
856239	THI22	YPR121W	S000006325	Protein with similarity to hydroxymethylpyrimidine phosphate kinases; member of a gene family with THI20 and THI21; not required for thiamine biosynthesis; SWAT-GFP and mCherry fusion proteins localize to the endoplasmic reticulum and vacuole respectively	0.0374185	1.14582e-05	0.86079	0.580023	0.673279	0.394635	0.388509	0.703485	0.751499	0.273207	0.350493	0.226244	0.21584	0.40443	0.368347	-0.764717	-0.5954	-0.337669	-0.273755	0.303132	-0.0115893	-0.300096	-0.106755	-0.649408	-0.439495	-0.576008	-0.57575	-0.127359	0.198323	0.528549	0.152265	-0.557403	-0.421731	-0.277688	-0.151823	-0.687275	-0.610818	-0.227935	-0.00539256	0.451027	0.0853554	-0.466824	-0.298986	-0.457848	-0.288376
854082	THP1	YOL072W	S000005433	Nuclear pore-associated protein; component of TREX-2 complex (Sac3p-Thp1p-Sus1p-Cdc31p) involved in transcription elongation and mRNA export from the nucleus; involved in post-transcriptional tethering of active genes to the nuclear periphery and to non-nascent mRNP; contains a PAM domain implicated in protein-protein binding	0.237204	0.000641571	0.480209	0.139852	0.401112	0.545262	0.253761	0.730031	0.241963	0.0806109	0.249101	0.344357	0.153389	0.441576	0.130941	-0.44308	-0.151954	0.222762	0.194198	0.700137	-0.250871	-0.491075	0.0532233	-0.454494	0.132973	0.202826	0.460683	0.602404	0.982267	0.661397	-0.379896	-0.225487	-0.434271	0.581084	0.763247	-0.259879	0.0861061	0.446233	0.593808	0.850562	-0.368796	-0.489767	-0.15243	-0.0994477	0.447215
856420	THR1	YHR025W	S000001067	Homoserine kinase; conserved protein required for threonine biosynthesis; long-lived protein that is preferentially retained in mother cells and forms cytoplasmic filaments; expression is regulated by the GCN4-mediated general amino acid control pathway	0.0505846	8.02962e-06	0.709911	0.516594	0.638977	0.64719	0.387422	0.760821	0.270504	0.239462	0.336179	0.363621	0.206561	0.417904	0.141992	-0.790544	-0.52901	-0.12549	-0.175438	0.264559	-0.121393	-0.500788	0.0535511	-0.486473	-0.345965	-0.913805	-0.816244	-0.52813	-0.302574	-0.373779	0.118671	-0.323915	-0.325832	-0.00894965	-0.744417	-0.935501	-0.727853	-0.339038	-0.257238	-0.0249522	-0.0148315	-0.465802	-0.129485	-0.300431	-0.580759
854472	TIM18	YOR297C	S000005823	Component of the mitochondrial TIM22 complex; involved in insertion of polytopic proteins into the inner membrane; may mediate assembly or stability of the complex	0.827594	2.74038e-06	0.685563	0.32758	0.611875	0.541392	0.547137	0.905278	0.523181	0.188218	0.341791	0.318215	0.318521	0.549205	0.291433	-0.427094	-0.511536	-0.408786	-0.411007	0.381746	0.219954	-0.0986038	-0.028557	-0.901633	-0.384222	0.681935	0.0871291	0.351444	0.539652	0.344058	0.571724	-0.361301	-0.2111	0.338554	0.49979	-0.0210719	-0.446871	-0.194257	-0.0876555	0.569883	0.54418	-0.304629	-0.149746	-0.68076	-0.0846554
851309	TIM22	YDL217C	S000002376	Essential core component of the mitochondrial TIM22 complex; involved in insertion of polytopic proteins into the inner membrane; forms the channel through which proteins are imported	0.0242809	1.31769e-05	0.0434166	-0.0169383	0.273476	0.674065	0.384739	0.748763	1.01592	-0.00851399	0.170242	0.403181	0.229872	0.428192	0.550741	-0.988212	-0.641821	-0.357721	-0.298129	-0.172949	-0.176366	-0.331913	-0.102827	-0.204157	-0.617567	-0.11327	0.428784	0.457221	0.770267	0.758601	-0.655643	-0.0710536	-0.360892	0.215717	0.605653	-0.780449	-0.189137	0.0326233	0.273374	0.355781	-0.541208	-0.28301	-0.302025	-0.00998778	-0.0598674
856188	TKL1	YPR074C	S000006278	Transketolase; catalyzes conversion of xylulose-5-phosphate and ribose-5-phosphate to sedoheptulose-7-phosphate and glyceraldehyde-3-phosphate in the pentose phosphate pathway; needed for synthesis of aromatic amino acids; TKL1 has a paralog, TKL2, that arose from the whole genome duplication	0.536661	8.78644e-05	0.414761	0.0495021	0.549695	0.76937	0.425228	0.497236	0.371958	0.0280138	0.3372	0.439272	0.237398	0.277892	0.200104	-0.533924	0.113301	0.458844	0.387317	0.465649	-0.67724	-0.472288	0.125683	0.0242718	0.257621	0.706713	0.942279	0.483217	0.438457	0.336806	-0.485187	0.543595	0.093695	0.217803	0.750306	0.0208533	0.71255	0.697942	0.609207	0.607481	-0.880459	-0.0350755	0.165795	0.163111	0.70629
856849	TMN3	YER113C	S000000915	Protein with a role in cellular adhesion and filamentous growth; similar to Emp70p and Tmn2p; member of Transmembrane Nine family with 9 transmembrane segments; localizes to Golgi; induced by 8-methoxypsoralen plus UVA irradiation	0.0186184	0.00448945	0.0192846	0.0402774	0.913469	0.685178	-0.0507028	0.192814	-0.0194646	0.0160065	0.424377	0.318836	-0.0227143	0.0874048	-0.00825328	-0.641099	-0.0165905	0.347113	0.24819	0.375233	-0.620113	-0.486687	0.151763	-0.0612944	0.107535	-0.629338	-0.848597	-0.861136	-0.399821	-0.0944917	0.444063	0.0819355	-0.649597	-0.411247	-0.754664	-0.855599	-0.383599	-0.0587048	0.0517876	0.299776	-0.37038	-0.406458	-0.144267	-0.234269	-0.230066
850935	TOP3	YLR234W	S000004224	DNA Topoisomerase III; conserved protein that functions in a complex with Sgs1p and Rmi1p to relax single-stranded negatively-supercoiled DNA preferentially; DNA catenation/decatenation activity is stimulated by RPA and Sgs1p-Top3p-Rmi1p; involved in telomere stability and regulation of mitotic recombination	0.160965	0.0013077	0.268102	-0.0827578	0.861099	0.462838	0.284899	0.357494	0.196046	-0.0825656	0.680729	0.414047	0.21724	0.309216	0.163247	0.1592	0.420874	0.770627	0.191276	0.373359	-0.373169	-0.501536	0.791957	-0.131412	0.5108	0.799282	0.0845113	0.109434	-0.0962669	-0.0783016	0.692383	-0.0399213	0.26859	-0.0434675	0.186125	0.771878	0.249498	0.416829	-0.00552188	0.0859982	0.456286	-0.243642	0.566219	-0.0929829	0.376583
853688	TPK3	YKL166C	S000001649	cAMP-dependent protein kinase catalytic subunit; promotes vegetative growth in response to nutrients via the Ras-cAMP signaling pathway; partially redundant with Tpk1p and Tpk2p; localizes to P-bodies during stationary phase; TPK3 has a paralog, TPK1, that arose from the whole genome duplication	0.115275	0.00970655	0.254303	-0.198358	0.366748	0.41846	0.072512	0.457846	0.424035	-0.0772932	0.160397	0.175003	0.031233	0.202167	0.184786	-0.934671	-0.527235	-0.462625	-0.549499	-0.295274	-0.267765	-0.0462296	0.0743912	-0.399793	-0.701046	-0.386005	-0.135501	-0.638473	-0.108422	-0.00370352	-0.214608	0.685204	-0.719457	-0.13344	-0.339296	-0.921558	-0.495212	-0.590115	-0.5063	-0.255724	-0.295159	0.165324	-0.151297	-0.384701	-0.706116
856499	TRA1	YHR099W	S000001141	Subunit of SAGA and NuA4 histone acetyltransferase complexes; interacts with acidic activators (e.g., Gal4p) which leads to transcription activation; similar to human TRRAP, which is a cofactor for c-Myc mediated oncogenic transformation	0.25319	0.00109345	0.460435	0.120787	0.637505	0.481142	-0.0120148	0.177702	0.120191	0.0848154	0.446004	0.297029	-0.00799495	0.119897	0.0830131	0.0833874	0.774479	0.509043	0.11539	0.0360835	-0.89626	0.296694	0.536995	0.109874	0.42073	0.421507	0.0704836	-0.557135	-0.356114	-0.3307	0.332351	0.83663	-0.297021	-0.119753	-0.222138	0.419599	0.578008	-0.141104	-0.230409	-0.261423	-0.31153	0.92044	0.102135	-0.0300234	0.0891521
853834	TTI1	YKL033W	S000001516	Subunit of the ASTRA complex, involved in chromatin remodeling; telomere length regulator involved in the stability or biogenesis of PIKKs such as TORC1; similar to S. pombe Tti1p; detected in highly purified mitochondria in high-throughput studies	0.295344	0.00318445	0.416593	-0.15358	0.563788	0.376228	0.251608	0.511054	0.357104	-0.10052	0.420553	0.248316	0.175371	0.328258	0.220707	-0.637081	0.132442	0.136262	0.2612	0.352464	-0.804609	-0.0152874	-0.147579	-0.0220701	0.0864406	0.585905	0.690648	0.53707	0.870212	0.559343	-0.287702	0.153053	-0.380186	0.541398	0.83799	-0.129084	0.513589	0.424456	0.718201	0.600732	-0.778728	0.0801762	-0.338993	0.307728	0.567196
853601	TTI2	YJR136C	S000003897	Subunit of the ASTRA complex, involved in chromatin remodeling; telomere length regulator involved in the stability or biogenesis of PIKKs such as TORC1; involved in the cellular stress response; similar to S. pombe Tti2p; may interact with Rsm23p; GFP-fusion protein localizes to the cytoplasm	0.0419516	1.27931e-06	0.0256581	-0.122157	0.596115	0.482755	0.503169	1.08437	0.914733	-0.0479382	0.264194	0.211242	0.231666	0.447676	0.394013	-0.982459	-0.626598	-0.557158	-0.347581	-0.271167	-0.189868	-0.0450844	-0.307847	-0.168493	-0.705582	0.106381	0.25398	0.427117	0.898035	0.326006	-0.214881	-0.251776	-0.562897	0.809929	0.537388	-0.756431	-0.366331	-0.200172	0.269106	-0.023733	-0.293055	-0.194816	-0.608954	0.364128	-0.255687
850445	TUP1	YCR084C	S000000680	General repressor of transcription; forms complex with Cyc8p, involved in the establishment of repressive chromatin structure through interactions with histones H3 and H4, appears to enhance expression of some genes	0.21987	0.000773021	0.114405	0.294114	0.949309	0.499834	0.118131	0.347144	0.0116851	0.229935	0.63185	0.352627	0.0833617	0.249132	0.00747724	0.438491	0.645561	0.751511	0.606275	0.87115	-0.378086	-0.191681	0.241374	-0.104266	0.851346	0.541365	-0.268771	-0.331029	-0.101201	0.0108359	0.881337	0.104149	-0.316111	-0.138846	-0.0785373	0.750239	0.239144	0.263658	0.347371	0.626004	0.447744	-0.0512393	-0.0856585	-0.186611	0.539405
852463	UBS1	YBR165W	S000000369	Ubiquitin-conjugating enzyme suppressor that regulates Cdc34p; functions as a general positive regulator of Cdc34p activity; nuclear protein that may represent a link between nucleocytoplasmic transport and ubiquitin ligase activity	0.241583	0.000130755	0.0561521	0.0347191	0.607836	0.273353	0.0927637	1.00188	0.612358	0.0160157	0.308779	0.146583	0.0474234	0.503513	0.306527	-0.876354	-0.514038	-0.329422	-0.524987	-0.148073	-0.226142	-0.208246	0.222095	-0.515988	-0.606791	-0.10307	-0.180631	0.287733	0.720374	0.226414	0.125412	-0.614517	-0.525175	0.684796	0.260139	-0.849409	-0.589259	-0.0720031	0.0835715	0.041168	-0.10405	-0.648757	-0.202313	0.0645426	-0.337036
851384	UGA3	YDL170W	S000002329	Transcriptional activator for GABA-dependent induction of GABA genes; binds to DNA elements found in the promoters of target genes and increases their expression in the presence of GABA (gamma-aminobutyrate); zinc finger transcription factor of the Zn(2)-Cys(6) binuclear cluster domain type; localized to the nucleus; examples of GABA genes include UGA1, UGA2, and UGA4	0.0307363	0.000378298	0.507004	0.452496	0.606154	0.42704	0.254461	0.518312	0.0726054	0.218662	0.329872	0.234606	0.124221	0.241228	0.033743	-0.0900752	0.432966	0.804825	0.69029	0.634219	-0.637739	-0.532123	0.20663	0.238937	0.664419	-0.303865	0.0494233	0.558282	0.631984	0.0996271	-0.366381	-0.686498	-0.0503894	0.699776	0.306966	-0.190182	0.300616	0.761586	0.71979	0.452189	-0.570434	-0.641522	0.111304	0.458281	0.561803
854780	ULP2	YIL031W	S000001293	Peptidase that deconjugates Smt3/SUMO-1 peptides from proteins; plays a role in chromosome cohesion at centromeric regions and recovery from checkpoint arrest induced by DNA damage or DNA replication defects; potential Cdc28p substrate; human homolog PML implicated in promyelocytic leukemia can partially complement yeast null mutant	0.563389	0.00219745	0.370793	0.00735853	0.547796	0.471436	0.097245	0.598446	0.335814	0.00464692	0.391174	0.317602	0.0675295	0.389506	0.213242	-0.755085	-0.0693887	0.115974	0.0679516	0.284605	-0.667314	-0.243366	0.0696423	-0.198652	-0.0691101	0.204935	0.273181	0.155498	0.774656	0.340632	-0.140614	0.136927	-0.771248	0.639239	0.453808	-0.508095	0.122083	0.202106	0.57199	0.468794	-0.662519	-0.11673	-0.452362	0.254722	0.242177
854363	ULS1	YOR191W	S000005717	Swi2/Snf2-related translocase, SUMO-Targeted Ubiquitin Ligase (STUbL); required for maintenance of NHEJ inhibition at telomeres; functions at telomeres to translocate and ubiquitinylate poly-sumoylated Rap1p for proteosomal degradation; plays role in antagonizing silencing during mating-type switching; only known STUbL with a translocase activity; contains RING finger domain; relocalizes from nuc…	0.0312778	0.00194291	0.182675	0.0643977	0.578032	0.609388	0.0669874	0.548025	0.0283939	0.0415619	0.441031	0.444296	0.0465176	0.358122	0.0172637	-0.386185	0.17832	0.531354	0.472183	0.650351	-0.611745	-0.487327	0.115617	-0.0530811	0.392766	0.0879638	0.347652	0.309049	0.843532	0.342356	-0.351785	0.0251159	-0.652359	0.724637	0.513182	-0.287181	0.285155	0.56411	0.72481	0.676336	-0.647876	-0.396138	-0.159987	0.240484	0.528852
852986	VAS1	YGR094W	S000003326	Mitochondrial and cytoplasmic valyl-tRNA synthetase; human homolog VARS2 implicated in mitochondrial diseases, can partially complement yeast null mutant	0.0740905	0.000860627	0.370253	0.0256508	0.672097	0.642189	0.299709	0.278071	0.258808	0.0121845	0.367588	0.365352	0.163881	0.155633	0.136687	-0.883099	-0.420465	-0.0206859	0.0141164	0.151067	-0.351248	-0.504098	-0.0456091	-0.133211	-0.277961	-0.679938	-0.879002	-0.79933	-0.565156	-0.0691529	0.431921	-0.0394459	-0.357541	-0.64572	-0.796111	-0.933265	-0.635514	-0.291566	-0.183392	0.0957978	-0.129396	-0.412692	-0.159202	-0.327772	-0.494152
855101	VPS20	YMR077C	S000004682	Myristoylated subunit of the ESCRT-III complex; the endosomal sorting complex required for transport of transmembrane proteins into the multivesicular body pathway to the lysosomal/vacuolar lumen; cytoplasmic protein recruited to endosomal membranes	0.580149	0.000441146	0.066022	-0.0485589	0.257396	0.382587	0.450824	1.08953	0.353644	-0.0178394	0.0975412	0.143165	0.158179	0.398339	0.126916	-0.528292	-0.289671	-0.128661	-0.431891	0.259896	-0.161884	-0.19379	0.373687	-0.8062	-0.295407	0.519539	0.766027	0.886103	0.644041	0.0849002	-0.449417	-0.219876	0.374177	0.729755	0.78054	0.103455	0.57545	0.844077	0.321006	0.31618	-0.624439	-0.404555	0.726404	0.089864	0.586138
854876	VPS9	YML097C	S000004563	Guanine nucleotide exchange factor (GEF) and ubiquitin receptor; involved in vesicle-mediated vacuolar transport, including Golgi-endosome trafficking and sorting through the multivesicular body (MVB); stimulates the intrinsic guanine nucleotide exchange activity of Rab family members (Vps21p/Ypt52p/Ypt53p); partially redundant with GEF MUK1; required for localization of the CORVET complex to end…	0.351444	0.00136887	0.877154	0.181494	0.256711	0.423528	0.228721	0.577439	0.398393	0.120102	0.154324	0.270984	0.133113	0.623279	0.229571	0.485655	0.201408	0.671374	0.243371	0.371437	0.230891	-0.645979	0.5929	-0.0635937	0.506362	0.78342	0.681199	0.817099	0.789266	0.40655	-0.0782362	-0.234598	0.0979026	0.591801	0.904782	0.742632	0.543766	0.850656	0.634652	0.440508	0.0548168	-0.45346	0.338497	0.362269	0.832503
855524	WHI3	YNL197C	S000005141	RNA binding protein that sequesters CLN3 mRNA in cytoplasmic foci; regulates genes involved in the cell cycle, sister chromatid cohesion, and stress response; acts as a cytoplasmic retention factor for Cdc28p and associated cyclins; regulates cell fate and dose-dependently regulates the critical cell size required for passage through Start; Tpk1p (PKA) mediated phosphorylation (S568) inhibits Whi…	0.770127	0.00170455	0.0542206	0.0445207	0.950838	0.572573	0.0831411	0.339062	0.00814848	0.0379131	0.72283	0.47239	0.0688798	0.271411	0.00628674	-0.116987	0.354966	0.71758	0.596181	0.747316	-0.565987	-0.513735	0.20862	0.00679986	0.610177	0.496167	-0.296905	-0.399277	-0.135008	-0.1867	0.871725	0.160128	-0.364913	0.0159262	-0.168585	0.595863	-0.115383	0.0481476	0.315506	0.371027	0.741813	-0.210546	-0.33449	0.0280596	0.280328
856764	YEN1	YER041W	S000000843	Holliday junction resolvase; promotes template switching during break-induced replication (BIR), causing non-reciprocal translocations (NRTs); localization is cell-cycle dependent and regulated by Cdc28p phosphorylation; homolog of human GEN1; similar to S. cerevisiae endonuclease Rth1p	0.0158764	1.2089e-05	0.0182417	-0.129002	0.605891	0.683268	0.353339	1.13749	0.759331	-0.0664843	0.355552	0.381219	0.192815	0.561602	0.359165	-0.7304	-0.126957	0.178078	0.19197	0.397753	-0.569812	-0.399506	-0.00390816	-0.154928	-0.0025083	0.425353	0.63022	0.696764	0.977489	0.561152	-0.37182	-0.137634	-0.30163	0.675285	0.863035	-0.0919559	0.417397	0.646033	0.872786	0.667703	-0.619926	-0.338774	-0.237253	0.436293	0.670902
851954	YPQ2	YDR352W	S000002760	Putative vacuolar membrane transporter for cationic amino acids; likely contributes to amino acid homeostasis by exporting cationic amino acids from the vacuole; member of the PQ-loop family, with seven transmembrane domains; mutant phenotype is functionally complemented by rat PQLC2 vacuolar transporter	0.623345	0.000403842	0.110249	0.0460007	0.84028	0.655419	0.388484	0.37591	-0.0128381	0.0182021	0.328858	0.264546	0.149228	0.154365	-0.00527929	-0.603714	-0.118827	0.284823	-0.0325225	0.267927	-0.453408	-0.532436	0.423268	-0.309065	-0.0316636	0.307281	-0.292456	-0.440001	-0.711848	-0.670262	0.677212	0.220392	0.310102	-0.230163	-0.485242	-0.128809	-0.418663	-0.268009	-0.818663	-0.537798	0.400763	-0.169999	0.675964	-0.497738	-0.565465
852662	YPT32	YGL210W	S000003178	Rab family GTPase involved in the exocytic pathway; mediates intra-Golgi traffic or the budding of post-Golgi vesicles from the trans-Golgi; protein abundance increases in response to DNA replication stress; YPT32 has a paralog, YPT31, that arose from the whole genome duplication	0.049043	0.00648991	0.19966	0.0232807	0.0370451	0.298933	0.196908	0.390289	0.785452	0.0137584	0.0192059	0.172189	0.100219	0.206572	0.389137	0.393871	-0.174832	0.289296	-0.115052	-0.0703143	0.615019	-0.609279	0.533662	-0.0752165	0.0752874	0.659101	0.583687	0.788265	0.723873	0.788006	-0.0792114	-0.319256	0.141933	0.12763	0.907486	0.67473	0.375001	0.729714	0.508315	0.576693	0.200387	-0.504671	0.336041	0.06628	0.73054
853949	AIM29	YKR074W	S000001782	Protein of unknown function; epitope-tagged protein localizes to the cytoplasm; YKR074W is not an essential gene; null mutant displays elevated frequency of mitochondrial genome loss	0.138071	2.00876e-05	0.741987	-0.306533	-0.399731	-0.386177	-0.50962	-0.747245	-0.658051	-0.436406	-0.655845	-0.494328	-0.607187	-0.820819	-0.839814	0.442331	0.833714	0.867705	0.751376	0.230096	-0.612243	-0.109575	0.213725	0.720328	0.8383	0.0621504	0.717168	0.462604	0.160893	-0.218642	-0.845003	0.286505	0.417134	0.422157	0.343655	0.342896	0.851233	0.789007	0.601362	0.0926519	-0.733839	0.0181706	0.297894	0.668018	0.726996
856330	ARR2	YPR200C	S000006404	Arsenate reductase required for arsenate resistance; converts arsenate to arsenite which can then be exported from cells by Arr3p	0.336694	0.00677524	0.164932	-0.711404	-0.287012	-0.394347	-0.309658	-0.235025	0.250898	-0.922128	-0.290622	-0.462326	-0.401337	-0.304196	0.284594	-0.419976	-0.818936	-0.936142	-0.788378	-0.624444	0.615905	0.220085	-0.258738	-0.372784	-0.945646	0.632296	0.145037	0.19955	0.414762	0.702784	0.448837	-0.0842651	-0.256912	-0.178148	0.50428	0.293346	-0.4336	-0.464455	-0.163098	0.21677	0.841812	0.0746665	-0.416827	-0.423074	-0.189366
855462	ATX1	YNL259C	S000005203	Cytosolic copper metallochaperone; transports copper to the secretory vesicle copper transporter Ccc2p for eventual insertion into Fet3p, which is a multicopper oxidase required for high-affinity iron uptake; human homolog ATOX1 can complement yeast atx1 mutant; overexpression of human ATOX1 suppresses lysine auxotrophy of the yeast sod1 null mutant, as does overexpression of yeast ATX1	0.0931847	0.000114542	0.836827	-0.256587	-0.255099	-0.480658	-0.501173	-0.622857	-0.505847	-0.390776	-0.536753	-0.749714	-0.699508	-0.765866	-0.697022	0.254069	0.827276	0.808036	0.693223	0.239934	-0.792362	-0.0376639	0.207229	0.636932	0.764066	-0.245547	0.483732	0.6525	0.570579	0.201167	-0.857424	-0.263542	0.153688	0.520565	0.472365	0.0936509	0.737177	0.780668	0.673379	0.234306	-0.838812	-0.114913	0.195612	0.617459	0.689473
854813	BET1	YIL004C	S000001266	Type II membrane protein required for vesicular transport; required for vesicular transport between the endoplasmic reticulum and Golgi complex; v-SNARE with similarity to synaptobrevins	0.0228026	1.52911e-05	0.849493	-0.641497	-0.303819	-0.549052	-0.511953	-0.685247	-0.37904	-0.324412	-0.143104	-0.301532	-0.290613	-0.386198	-0.211655	-0.562132	-0.954137	-0.786816	-0.499248	-0.497579	0.644767	-0.151274	-0.424121	-0.133925	-0.862777	-0.171622	-0.850389	-0.660659	-0.444684	-0.116438	0.904044	-0.189299	-0.323881	-0.446049	-0.613755	-0.358418	-0.942112	-0.752662	-0.49279	-0.296081	0.83327	-0.181886	-0.386467	-0.327254	-0.759251
852652	BOL2	YGL220W	S000003188	Cytosolic protein involved in repression of iron regulon transcription; forms an iron-independent complex with Fra1p, Grx3p, and Grx4p; null mutant fails to repress the iron regulon and is sensitive to nickel; sequence similarity to human BOLA family member, BOLA2	0.0440519	0.00259037	0.219973	-0.411047	-0.690369	-0.409572	-0.444304	-0.00975172	0.0577342	-0.209381	-0.383333	-0.196197	-0.218003	-0.00444396	0.0274525	0.238647	0.683952	0.208958	-0.0469842	-0.411396	-0.626491	0.584792	0.339777	0.351965	0.1993	0.221541	0.789576	0.704507	0.811078	0.438108	-0.777203	0.0535489	-0.0807467	0.587834	0.792028	0.25185	0.851355	0.648231	0.666468	0.252842	-0.825038	0.207194	0.02667	0.590181	0.718874
853721	CMC1	YKL137W	S000001620	Copper-binding protein of the mitochondrial intermembrane space; evolutionarily conserved; may be involved in delivering copper from the matrix to the cytochrome c oxidase complex; contains a twin CX9C motif	0.278125	0.00016048	0.988401	-0.36216	-0.408024	-0.410847	-0.339535	-0.551635	-0.472151	-0.499568	-0.622736	-0.528327	-0.42286	-0.603868	-0.550039	0.375339	0.766575	0.774926	0.885226	0.375877	-0.594309	-0.0700242	-0.0800593	0.743855	0.846745	0.281436	0.859599	0.844123	0.694994	0.342906	-0.80588	-0.0451941	0.253404	0.5362	0.812485	0.34472	0.821632	0.820327	0.825907	0.370427	-0.694572	-0.0612929	0.0558849	0.674272	0.850989
852220	CMC2	YBL059C-A	S000007488	Protein involved in respiratory chain complex assembly or maintenance; protein of the mitochondrial intermembrane space; contains twin Cx9C motifs that can form coiled coil-helix-coiled-coil helix fold	0.184949	0.000402821	0.926122	-0.350923	-0.577725	-0.458364	-0.424037	-0.248122	-0.288374	-0.442549	-0.659881	-0.464815	-0.427087	-0.236517	-0.269279	0.95592	0.809393	0.570333	0.427013	0.365461	-0.0678906	0.258629	0.225048	0.174672	0.796606	0.59251	0.89779	0.837799	0.827053	0.539595	-0.543114	0.0115993	0.0778758	0.506554	0.96843	0.79444	0.916271	0.771829	0.700745	0.496266	-0.364561	0.123484	0.149137	0.390114	0.953963
855298	COX7	YMR256C	S000004869	Subunit VII of cytochrome c oxidase (Complex IV); Complex IV is the terminal member of the mitochondrial inner membrane electron transport chain	0.325442	0.000944622	0.722914	-0.23278	-0.43456	-0.647181	-0.413116	-0.227824	-0.188431	-0.41479	-0.629919	-0.793887	-0.550439	-0.330536	-0.260523	0.671443	0.490692	-0.121109	-0.311223	-0.162903	0.0507617	0.783167	0.231185	-0.230766	0.125053	0.826467	0.896861	0.715741	0.589987	0.556855	-0.307983	0.174182	0.213987	0.189426	0.921822	0.812564	0.695826	0.154629	-0.0377399	0.0666313	-0.0675932	0.6727	0.255195	-0.114369	0.418776
853958	DAD2	YKR083C	S000001791	Essential subunit of the Dam1 complex (aka DASH complex); complex couples kinetochores to the force produced by MT depolymerization thereby aiding in chromosome segregation; is transferred to the kinetochore prior to mitosis	0.096776	8.61772e-06	0.820216	-0.27692	-0.56066	-0.450283	-0.709459	-0.60981	-0.603962	-0.449892	-0.648399	-0.621517	-0.79036	-0.687813	-0.817653	0.800436	0.434484	0.621636	0.246024	-0.0608711	0.250852	-0.284429	0.522814	0.37207	0.531221	0.606966	0.130727	0.307227	0.0324768	-0.446945	0.441607	-0.24683	0.371109	0.488025	0.169915	0.758212	0.348372	0.536649	0.184053	-0.185096	0.317552	-0.279329	0.487178	0.417908	0.429142
852535	DAD3	YBR233W-A	S000007595	Essential subunit of the Dam1 complex (aka DASH complex); complex couples kinetochores to the force produced by MT depolymerization thereby aiding in chromosome segregation; is transferred to the kinetochore prior to mitosis	0.0501168	1.15224e-06	0.474938	-0.261145	-0.495501	-0.634672	-0.662264	-0.94135	-0.671817	-0.322777	-0.450967	-0.608511	-0.736778	-1.13311	-0.877816	0.769029	0.243239	-0.112005	-0.143591	-0.381121	0.461353	0.457946	0.0313591	0.199491	0.0793625	-0.0231678	-0.575359	-0.836247	-0.821904	-0.505223	0.704611	0.394164	-0.0823071	-0.534412	-0.745814	0.428079	-0.199529	-0.557412	-0.567098	-0.516814	0.680465	0.49546	-0.0305175	-0.200514	-0.394166
854785	EMC5	YIL027C	S000001289	Member of conserved ER transmembrane complex; required for efficient folding of proteins in the ER; null mutant displays induction of the unfolded protein response, and also shows K1 killer toxin resistance; homologous to worm B0334.15/EMC-5, fly CG15168, human MMGT	0.0219975	0.000322106	0.904901	-0.33449	-0.322779	-0.622337	-0.410432	-0.435918	-0.265228	-0.374301	-0.323419	-0.485543	-0.337423	-0.379255	-0.249043	0.619898	0.768385	0.193321	-0.0489503	-0.229572	-0.352041	0.712571	0.321285	0.167654	0.340358	0.790243	0.887774	0.489854	0.14617	0.0303065	-0.332713	0.465748	0.472316	0.154585	0.607869	0.69855	0.829648	0.313956	0.0271903	-0.131183	-0.350881	0.628214	0.386823	0.165576	0.452237
850646	EMC6	YLL014W	S000003937	Member of conserved ER transmembrane complex; required for efficient folding of proteins in the ER; null mutant displays induction of the unfolded protein response; homologous to worm F33D4.7/EMC-6, fly CG11781, human TMEM93	0.963592	6.07908e-06	0.924798	-0.428533	-0.517177	-0.594188	-0.415952	-0.739198	-0.586752	-0.502129	-0.685305	-0.736959	-0.513872	-0.88638	-0.744654	0.016483	0.432263	0.302757	0.648725	-0.0315027	-0.530292	0.140583	-0.414389	0.852083	0.383742	-0.798328	-0.285482	-0.15303	-0.480713	-0.313096	-0.437219	-0.155798	0.402748	-0.294964	-0.498825	-0.544564	0.167002	0.149796	0.214058	-0.245784	-0.755806	0.0102695	-0.0697916	0.516548	-0.0234296
856715	GIM4	YEL003W	S000000729	Subunit of the heterohexameric cochaperone prefoldin complex; complex binds specifically to cytosolic chaperonin and transfers target proteins to it	0.371595	2.89972e-05	0.523538	-0.247583	-0.383521	-0.577432	-0.345982	-0.853841	-0.51925	-0.294309	-0.535839	-0.67965	-0.42434	-1.08772	-0.830698	0.108495	0.416546	0.0456053	0.0967281	-0.565346	-0.418399	0.465708	-0.0611665	0.687699	0.0553358	-0.618822	-0.397962	-0.531557	-0.855121	-0.680392	-0.115435	0.209772	0.368493	-0.401259	-0.78502	-0.330009	0.0216079	-0.315562	-0.491894	-0.824505	-0.357341	0.450703	0.198831	0.202302	-0.474134
855690	GPI15	YNL038W	S000004983	Protein involved in the synthesis of GlcNAc-PI; GlcNAc-PI is the first intermediate in the synthesis of glycosylphosphatidylinositol (GPI) anchors; homologous to the human PIG-H protein; GlcNAc-PI stands for N-acetylglucosaminyl phosphatidylinositol	0.0467866	2.11423e-06	0.677417	-0.413936	-0.64141	-0.488565	-0.404907	-0.861563	-0.714636	-0.332642	-0.467406	-0.301829	-0.270572	-0.566871	-0.50178	0.827082	0.784653	0.429715	0.501573	0.0817441	-0.165435	0.415994	-0.0579227	0.552702	0.679162	0.545319	0.69849	0.0952212	-0.217183	-0.230444	-0.338208	0.755775	0.40247	-0.0442735	0.229442	0.773918	0.825286	0.307525	0.193886	-0.0664614	-0.269996	0.631325	0.167341	0.311709	0.525732
850384	HTL1	YCR020W-B	S000006439	Component of the RSC chromatin remodeling complex; RSC functions in transcriptional regulation and elongation, chromosome stability, and establishing sister chromatid cohesion; involved in telomere maintenance	0.0311529	5.81346e-05	0.453885	-0.534726	-0.119	-0.547251	-0.237395	-0.655469	-0.677915	-0.362776	-0.103565	-0.422322	-0.197847	-0.494398	-0.622474	-0.655557	-0.0214234	-0.162507	0.125695	-0.22386	-0.628458	0.190928	-0.377019	0.382853	-0.2107	-0.696912	-0.564112	-0.563391	-0.642748	-0.841527	0.0166401	0.0423162	0.0571502	0.0285084	-0.833784	-0.767974	-0.288853	-0.380702	-0.231022	-0.556313	-0.402601	0.145392	-0.218543	0.264091	-0.543941
855767	HUB1	YNR032C-A	S000007251	Ubiquitin-like protein modifier; promotes alternative splicing of SRC1 pre-mRNA; binds non-covalently to the HIND domain of Snu66, may function in modification of Sph1p and Hbt1p, functionally complemented by the human or S. pombe ortholog; mechanism of Hub1p adduct formation not yet clear	0.0258382	0.000144863	0.466688	-0.539042	-0.770178	-0.42016	-0.311453	-0.397664	-0.0946306	-0.318714	-0.430906	-0.221462	-0.168191	-0.251969	-0.0604422	-0.0132698	-0.399571	-0.702512	-0.914949	-0.737893	0.492151	0.437098	0.21481	-0.419437	-0.732434	0.28467	0.383922	-0.1075	-0.584158	-0.203283	-0.200958	0.629853	0.594682	-0.535625	-0.0689828	0.123226	-0.0867416	-0.515402	-0.877239	-0.583269	0.232946	0.581764	0.418145	-0.52636	-0.517368
856667	IES6	YEL044W	S000000770	Component of the INO80 chromatin remodeling complex; critical for INO80 function; involved in regulation of chromosome segregation and maintenance of normal centromeric chromatin structure; human ortholog INO80C is a member of the human INO80 complex; implicated in DNA repair based on genetic interactions with RAD52 epistasis genes	0.320671	0.000227139	0.632842	-0.442089	-0.263852	-0.303327	-0.464785	-0.750427	-0.248201	-0.285064	-0.155117	-0.192387	-0.320201	-0.49817	-0.169706	-0.101697	-0.510757	-0.460306	-0.195789	-0.725913	0.544365	-0.0284976	-0.369909	0.478257	-0.510388	0.004854	-0.629051	-0.794416	-0.514299	-0.0993586	0.800547	0.270128	-0.415278	-0.551184	-0.568798	-0.0494981	-0.707067	-0.796848	-0.462704	-0.44734	0.844879	0.174707	-0.483805	-0.137939	-0.6646
854821	IST3	YIR005W	S000001444	Component of the U2 snRNP; required for the first catalytic step of splicing and for spliceosomal assembly; interacts with Rds3p and is required for Mer1p-activated splicing; diploid mutants have a specific defect in MATa1 pre-mRNA splicing which leads to haploid gene expression in diploids	0.448744	0.0001291	0.997143	-0.397701	-0.410468	-0.445155	-0.496708	-0.486207	-0.343946	-0.535917	-0.658053	-0.586103	-0.684442	-0.62769	-0.588448	-0.139213	0.232983	-0.0209759	-0.225556	-0.767663	-0.433916	0.322845	0.257166	0.482355	-0.201988	-0.371267	0.127051	-0.173028	-0.206513	-0.673689	-0.531975	0.39285	0.0290787	0.412469	-0.300619	-0.236748	0.192539	-0.0839186	-0.220812	-0.739503	-0.480292	0.356133	0.16672	0.460195	-0.245408
852255	LSM2	YBL026W	S000000122	Lsm (Like Sm) protein; part of heteroheptameric complexes (Lsm2p-7p and either Lsm1p or 8p): cytoplasmic Lsm1p complex involved in mRNA decay; nuclear Lsm8p complex part of U6 snRNP and possibly involved in processing tRNA, snoRNA, and rRNA; relocalizes from nucleus to cytoplasmic foci upon DNA replication stress	0.20822	3.30621e-05	0.477524	-0.421491	-0.34742	-0.928687	-0.338189	-0.483005	-0.378172	-0.528648	-0.480369	-1.02573	-0.48248	-0.690899	-0.577008	-0.0687943	0.118565	-0.596981	-0.403065	-0.374247	-0.218769	0.950908	-0.291092	-0.135594	-0.349987	-0.683905	-0.672259	-0.848182	-0.875688	-0.614956	0.166443	0.287608	-0.0302875	-0.492711	-0.959031	-0.221825	-0.057647	-0.715904	-0.555384	-0.468584	-0.148907	0.887568	-0.257975	-0.233928	-0.529467
851984	LSM6	YDR378C	S000002786	Lsm (Like Sm) protein; part of heteroheptameric complexes (Lsm2p-7p and either Lsm1p or 8p): cytoplasmic Lsm1p complex involved in mRNA decay; nuclear Lsm8p complex part of U6 snRNP and possibly involved in processing tRNA, snoRNA, and rRNA	0.279539	7.3191e-06	0.813787	-0.563735	-0.715194	-0.632994	-0.554975	-0.518345	-0.256103	-0.576264	-0.631819	-0.547475	-0.45035	-0.417733	-0.225684	0.708504	0.368088	0.194297	-0.11693	-0.531746	0.242905	0.204921	0.408583	0.38384	0.164782	0.791	0.867905	0.882116	0.645679	0.359323	-0.306823	-0.0856608	0.366757	0.457404	0.927067	0.864811	0.711394	0.618703	0.302497	-0.102449	-0.0350394	0.0697734	0.447445	0.485081	0.627359
850383	MAK31	YCR020C-A	S000000614	Non-catalytic subunit of N-terminal acetyltransferase of the NatC type; required for replication of dsRNA virus; member of the Sm protein family	0.276988	0.000291267	0.993266	-0.387605	-0.464805	-0.449613	-0.439077	-0.388336	-0.27701	-0.388874	-0.5562	-0.505955	-0.539526	-0.45405	-0.388446	-0.641132	-0.542517	-0.703877	-0.667554	-0.842792	0.0451031	0.258114	-0.0999532	-0.00160433	-0.863904	-0.862394	-0.524852	-0.592451	-0.408361	-0.565561	-0.198503	0.130965	-0.278316	0.0490209	-0.742648	-0.757576	-0.548147	-0.671052	-0.566816	-0.738281	-0.0642179	0.206952	-0.183339	0.0213097	-0.830645
851327	MGT1	YDL200C	S000002359	DNA repair methyltransferase (6-O-methylguanine-DNA methylase); involved in protection against DNA alkylation damage	0.430945	8.13576e-07	0.965369	-0.561208	-0.731072	-0.714402	-0.589679	-0.688655	-0.479169	-0.412195	-0.647379	-0.538881	-0.455855	-0.51628	-0.360761	-0.273412	0.454476	0.105069	0.201748	-0.165471	-0.848283	0.433906	-0.114228	0.420664	0.116124	-0.410875	0.416385	0.381847	0.369224	0.376408	-0.937566	0.0143885	0.0452664	0.0906278	0.321121	-0.379272	0.462503	0.28683	0.321465	0.164228	-0.964297	0.200203	-0.0218025	0.242397	0.253444
852188	MRP21	YBL090W	S000000186	Mitochondrial ribosomal protein of the small subunit; MRP21 exhibits genetic interactions with mutations in the COX2 and COX3 mRNA 5'-untranslated leader sequences	0.0362325	1.24212e-06	0.933336	-0.484056	-0.684831	-0.725934	-0.457091	-0.671387	-0.663678	-0.452344	-0.602161	-0.586635	-0.355066	-0.472318	-0.478142	0.740819	0.812251	0.710061	0.827729	0.466756	-0.286606	0.0747789	-0.0943575	0.580247	0.924077	0.549152	0.852406	0.954317	0.775776	0.432495	-0.529066	-0.202133	0.299063	0.548793	0.943029	0.677235	0.860239	0.850364	0.832959	0.467371	-0.410891	-0.0527572	0.0872642	0.586249	0.966102
855226	MRPS17	YMR188C	S000004800	Mitochondrial ribosomal protein of the small subunit	0.516015	2.53845e-06	0.898456	-0.633245	-0.682675	-0.3696	-0.504908	-0.70993	-0.592787	-0.469142	-0.535554	-0.285743	-0.364188	-0.490105	-0.41029	-0.0137515	0.192743	0.740315	0.822506	0.40106	-0.257555	-0.749434	-0.0471594	0.639337	0.581495	0.225002	0.844201	0.82263	0.632535	0.51292	-0.842836	-0.0358356	0.303574	0.287181	0.809487	0.0978584	0.530538	0.886409	0.850921	0.51221	-0.573225	-0.518159	0.112904	0.564129	0.773961
853120	MVB12	YGR206W	S000003438	ESCRT-I subunit required to stabilize ESCRT-I core complex oligomers; the ESCRT-I core complex (Stp22p, Vps28p, Srn2p) is involved in ubiquitin-dependent sorting of proteins into the endosome; deletion mutant is sensitive to rapamycin and nystatin	0.0490378	0.00421339	0.655685	-0.264154	-0.335632	-0.639892	-0.213729	-0.289367	-0.0652684	-0.394061	-0.510026	-0.656334	-0.240574	-0.322648	-0.0752563	0.503187	0.760089	0.104533	0.0441852	-0.136001	-0.458258	0.821199	0.0843558	0.191891	0.332732	0.552786	0.978167	0.800049	0.578206	0.451087	-0.684509	0.163916	0.341999	0.280292	0.882893	0.581438	0.947404	0.451592	0.306766	0.132752	-0.616943	0.592507	0.217843	0.255279	0.634245
854427	NAT5	YOR253W	S000005779	Subunit of protein N-terminal acetyltransferase NatA; NatA is comprised of Nat1p, Ard1p, and Nat5p; N-terminally acetylates many proteins, which influences multiple processes such as the cell cycle, heat-shock resistance, mating, sporulation, and telomeric silencing	0.0348768	8.8543e-08	0.711617	-0.487794	-0.615346	-0.68548	-0.724085	-1.02539	-0.750012	-0.389356	-0.492727	-0.474599	-0.46744	-0.665228	-0.534915	0.615182	0.881819	0.781872	0.53597	0.0232106	-0.500241	0.0664322	0.371036	0.654744	0.759564	0.422134	0.844481	0.619874	0.0979494	-0.0792455	-0.646058	0.236545	0.707751	0.203143	0.51644	0.573275	0.904868	0.757554	0.405767	-0.0114169	-0.571303	0.128213	0.503106	0.524676	0.706166
855959	POC4	YPL144W	S000006065	Component of a heterodimeric Poc4p-Irc25p chaperone; involved in assembly of alpha subunits into the 20S proteasome; may regulate formation of proteasome isoforms with alternative subunits under different conditions; upregulates proteasome assembly in response to the unfolded protein response activated by mistargeting of proteins (UPRam)	0.534534	0.00883715	0.546029	-0.236438	0.03586	-0.136207	-0.24174	-0.473951	-0.502704	-0.11576	0.0185638	-0.064845	-0.124477	-0.235368	-0.237936	-0.0374168	0.560624	0.43679	0.729735	0.669482	-0.746556	0.123124	-0.337034	0.253569	0.62198	-0.170073	-0.177247	-0.74923	-0.392892	0.048505	0.0541278	0.780996	-0.508224	-0.545478	-0.403254	-0.111965	0.381326	0.00643558	0.419219	0.579108	-0.594309	0.47371	-0.52164	-0.0488333	0.324795
851200	POP5	YAL033W	S000000031	Subunit of both RNase MRP and nuclear RNase P; RNase MRP cleaves pre-rRNA, while nuclear RNase P cleaves tRNA precursors to generate mature 5' ends and facilitates turnover of nuclear RNAs	0.572998	0.000126269	0.946876	-0.379939	-0.472142	-0.397516	-0.384923	-0.641429	-0.329972	-0.447635	-0.577825	-0.446026	-0.466296	-0.752484	-0.479713	-0.0340311	-0.0715243	-0.278952	-0.237181	-0.879598	0.0564409	0.283781	-0.0742404	0.579586	-0.36625	-0.343489	-0.178629	-0.636105	-0.795424	-0.772324	-0.117539	0.627474	0.152716	-0.233816	-0.698587	-0.174899	-0.127057	-0.468718	-0.511238	-0.931878	-0.0141841	0.468136	0.01782	0.285207	-0.554932
9164928	RDN5-2	RDN5-2	S000006480	Variant 5S ribosomal rRNA (5S rRNA) gene; located within the RDN1 locus; unable to support cell viability when provided as sole source of 5S rRNA; identical in sequence to variant alleles RDN5-3, RDN5-4, and RDN5-5	0.232004	0.00456324	0.375397	-0.42995	-0.425757	-0.592165	-0.30657	-0.0197669	0.0147179	-1.68453	-3.16428	-2.67272	-2.2247	-0.135581	0.696185	-0.420135	-0.442999	-0.843402	-0.869188	-0.739656	0.140219	0.571188	-0.0320962	-0.35979	-0.862208	-0.568335	-0.116048	-0.0924608	0.0684245	-0.527111	-0.421544	-0.0227418	-0.2106	0.613662	-0.279261	-0.519083	-0.427795	-0.782674	-0.766105	-0.796734	0.0220404	0.508944	-0.0810122	-0.172321	-0.845826
9164924	RDN5-3	RDN5-3	S000006481	Variant 5S ribosomal RNA (5S rRNA) gene; located at a site distal to the RDN1 locus; unable to support cell viability when provided as sole source of 5S rRNA; identical in sequence to variant alleles RDN5-2, RDN5-4, and RDN5-5	0.232004	0.00456324	0.375397	-0.42995	-0.425752	-0.592175	-0.306568	-0.0197718	0.0147182	-1.68451	-3.16426	-2.67274	-2.22468	-0.13562	0.696208	-0.420135	-0.44299	-0.843401	-0.869185	-0.739648	0.140208	0.571198	-0.0320992	-0.359794	-0.862203	-0.568379	-0.116082	-0.0924956	0.0683826	-0.527118	-0.421545	-0.0227377	-0.210594	0.613616	-0.279303	-0.519087	-0.427794	-0.782679	-0.766112	-0.796722	0.0220339	0.508953	-0.0810112	-0.172341	-0.845827
9164929	RDN5-4	RDN5-4	S000029708	Variant 5S ribosomal rRNA (5S rRNA) gene; located at a site distal to the RDN1 locus; unable to support cell viability when provided as sole source of 5S rRNA; identical in sequence to variant alleles RDN5-2, RDN5-3, and RDN5-5	0.232004	0.00456324	0.375397	-0.429953	-0.425749	-0.592177	-0.306561	-0.0197848	0.0147192	-1.68451	-3.16424	-2.67272	-2.22464	-0.135713	0.696278	-0.420143	-0.442991	-0.843403	-0.86918	-0.739644	0.140201	0.5712	-0.0321096	-0.359791	-0.862203	-0.568428	-0.116116	-0.0925433	0.0683244	-0.527133	-0.421552	-0.0227165	-0.210584	0.613557	-0.279357	-0.519096	-0.427798	-0.782686	-0.766116	-0.79671	0.0220306	0.508957	-0.0810152	-0.172358	-0.845831
9164946	RDN5-5	RDN5-5	S000029710	Variant 5S ribosomal rRNA (5S rRNA) gene; located at a site distal to the RDN1 locus; unable to support cell viability when provided as sole source of 5S rRNA; identical in sequence to variant alleles RDN5-2, RDN5-3, and RDN5-4	0.232004	0.00456324	0.375397	-0.429969	-0.425736	-0.59219	-0.306569	-0.0197956	0.0147189	-1.68451	-3.16418	-2.67271	-2.22464	-0.135788	0.696248	-0.420163	-0.442975	-0.843392	-0.869173	-0.739639	0.140161	0.571205	-0.0321019	-0.359788	-0.862197	-0.568472	-0.116145	-0.0925836	0.0682756	-0.527144	-0.421558	-0.0226996	-0.210577	0.613507	-0.279402	-0.519114	-0.427786	-0.782676	-0.766115	-0.796695	0.0219964	0.50896	-0.0810037	-0.172372	-0.845825
856853	RPL23B	YER117W	S000000919	Ribosomal 60S subunit protein L23B; homologous to mammalian ribosomal protein L23 and bacterial L14; RPL23B has a paralog, RPL23A, that arose from the whole genome duplication	0.0318857	2.72474e-05	0.560394	-0.192061	-0.537276	-0.470514	-0.40426	-0.832592	-0.504865	-0.133089	-0.336332	-0.279645	-0.241536	-0.521592	-0.378495	0.625881	0.361622	0.0886523	-0.0992705	-0.609436	0.168461	0.33848	0.244508	0.483868	0.101959	0.0500501	-0.0358306	-0.386314	-0.819557	-0.799979	0.0953726	0.472973	0.518371	-0.236687	-0.512859	0.414788	0.20748	-0.136749	-0.469122	-0.77722	0.152344	0.445912	0.40993	0.183822	-0.191345
856401	RPL27A	YHR010W	S000001052	Ribosomal 60S subunit protein L27A; homologous to mammalian ribosomal protein L27, no bacterial homolog; RPL27A has a paralog, RPL27B, that arose from the whole genome duplication	0.0166545	3.956e-06	0.792487	-0.388291	-0.570873	-0.639523	-0.557644	-0.820435	-0.404583	-0.272541	-0.356708	-0.400376	-0.353554	-0.564518	-0.332588	0.318023	-0.00982613	-0.300948	-0.521385	-0.85589	0.330453	0.391335	0.255742	0.196385	-0.352109	-0.00877703	-0.353328	-0.59151	-0.91888	-0.776536	0.438151	0.346666	0.368708	-0.385765	-0.695709	0.190335	-0.162068	-0.445058	-0.724278	-0.86568	0.395337	0.392106	0.319038	-0.0504667	-0.522327
850592	RPL29	YFR032C-A	S000006437	Ribosomal 60S subunit protein L29; not essential for translation, but required for proper joining of large and small ribosomal subunits and for normal translation rate; homologous to mammalian ribosomal protein L29, no bacterial homolog	0.198933	1.56859e-05	0.527462	-0.170693	-0.508506	-0.633795	-0.536826	-0.807512	-0.40884	-0.305766	-0.788649	-0.836545	-0.7487	-1.25208	-0.82035	0.645785	0.498613	0.0933048	-0.110148	-0.542692	0.015084	0.50552	0.264509	0.403365	0.15704	-0.1506	-0.153264	-0.534932	-0.919817	-0.694593	0.0432654	0.523821	0.445801	-0.468894	-0.637247	0.455165	0.337627	-0.125825	-0.430631	-0.689073	0.0280976	0.59588	0.375898	0.144363	-0.113552
853250	RPL39	YJL189W	S000003725	Ribosomal 60S subunit protein L39; required for ribosome biogenesis; loss of both Rpl31p and Rpl39p confers lethality; also exhibits genetic interactions with SIS1 and PAB1; homologous to mammalian ribosomal protein L39, no bacterial homolog	0.0775644	0.000161287	0.628923	-0.282419	-0.445714	-0.747852	-0.419583	-0.470881	-0.176219	-0.352141	-0.550177	-0.812042	-0.521696	-0.682523	-0.301944	0.0590681	-0.0579483	-0.618439	-0.726341	-0.756724	0.132367	0.756424	0.0890332	-0.162032	-0.549786	-0.47301	-0.538624	-0.757918	-0.979101	-0.665367	0.208301	0.335542	0.221622	-0.573109	-0.889242	-0.109404	-0.217263	-0.703139	-0.854613	-0.775539	0.165414	0.668542	0.137649	-0.305471	-0.694834
851344	RPL41A	YDL184C	S000002343	Ribosomal 60S subunit protein L41A; comprises only 25 amino acids; rpl41a rpl41b double null mutant is viable; homologous to mammalian ribosomal protein L41, no bacterial homolog; RPL41A has a paralog, RPL41B, that arose from the whole genome duplication	0.127015	8.94601e-05	0.806924	-0.206039	-0.431753	-0.580067	-0.532812	-0.600801	-0.323167	-0.669882	-0.962077	-1.03866	-0.976081	-1.23452	-0.950752	0.704457	0.56986	0.174405	-0.123797	-0.466659	-0.0163661	0.486834	0.39058	0.310067	0.226077	0.542425	0.402769	-0.0257781	-0.460656	-0.554514	0.0329586	0.544052	0.548104	-0.028175	-0.0261633	0.669589	0.53151	0.120689	-0.220566	-0.498537	-0.00272393	0.510391	0.440917	0.219541	0.158489
851422	RPL41B	YDL133C-A	S000002293	Ribosomal 60S subunit protein L41B; comprises only 25 amino acids; rpl41a rpl41b double null mutant is viable; homologous to mammalian ribosomal protein L41, no bacterial homolog; RPL41B has a paralog, RPL41A, that arose from the whole genome duplication	0.211259	0.000191991	0.651412	-0.155383	-0.445514	-0.483182	-0.49212	-0.68372	-0.243836	-0.402379	-0.956632	-0.799294	-0.867567	-1.25173	-0.621197	0.644555	0.549585	0.213871	-0.0173013	-0.520705	-0.0506215	0.408239	0.308822	0.498821	0.236566	0.26156	0.459429	-0.147122	-0.500582	-0.444984	-0.319577	0.778522	0.435807	-0.188208	-0.0944583	0.587386	0.566084	0.130346	-0.151981	-0.539013	-0.12866	0.541168	0.36712	0.34677	0.16302
856544	RPL42B	YHR141C	S000001183	Ribosomal 60S subunit protein L42B; required for propagation of the killer toxin-encoding M1 double-stranded RNA satellite of the L-A double-stranded RNA virus; homologous to mammalian ribosomal protein L36A, no bacterial homolog; RPL42B has a paralog, RPL42A, that arose from the whole genome duplication	0.0154144	7.67656e-06	0.895474	-0.422326	-0.573877	-0.65298	-0.452627	-0.721681	-0.405061	-0.338008	-0.406694	-0.457055	-0.331204	-0.595187	-0.392644	0.216935	-0.137692	-0.520396	-0.66288	-0.840059	0.391103	0.524016	0.140301	0.00157368	-0.509312	-0.00898559	-0.328384	-0.593516	-0.93469	-0.735634	0.406391	0.380908	0.386015	-0.446666	-0.684894	0.121461	-0.230256	-0.573348	-0.812242	-0.82355	0.412714	0.477973	0.258187	-0.203864	-0.608824
852058	RPS17B	YDR447C	S000002855	Ribosomal protein 51 (rp51) of the small (40s) subunit; homologous to mammalian ribosomal protein S17, no bacterial homolog; RPS17B has a paralog, RPS17A, that arose from the whole genome duplication; protein abundance increases in response to DNA replication stress	0.0326085	2.39048e-06	0.869489	-0.376918	-0.594887	-0.577173	-0.556993	-0.816183	-0.575998	-0.401186	-0.537235	-0.497588	-0.477933	-0.765554	-0.70637	0.557301	0.275288	0.000457114	-0.268623	-0.694904	0.209086	0.347602	0.340397	0.35512	-0.0280538	0.144848	-0.0617494	-0.383584	-0.786139	-0.824438	0.222955	0.436524	0.479764	-0.169958	-0.49464	0.391193	0.129686	-0.182608	-0.530061	-0.794724	0.227151	0.409036	0.425486	0.124243	-0.252034
851717	RUB1	YDR139C	S000002546	Ubiquitin-like protein with similarity to mammalian NEDD8; conjugation (neddylation) substrates include the cullins Cdc53p, Rtt101p, and Cul3p; activated by Ula1p and Uba3p (E1 enzyme pair); conjugation mediated by Ubc12p (E2 enzyme)	0.482796	4.71165e-05	0.876578	-0.334076	-0.475948	-0.573633	-0.355817	-0.683617	-0.39359	-0.334056	-0.593981	-0.630249	-0.407582	-0.754048	-0.496998	-0.347614	0.0415195	-0.232047	-0.0315928	-0.61674	-0.400133	0.363842	-0.271361	0.576778	-0.275636	-0.892525	-0.349245	-0.317895	-0.45585	-0.363165	-0.450761	-0.0152631	0.15011	-0.213446	-0.589311	-0.717144	-0.173319	-0.320842	-0.27807	-0.579054	-0.497911	0.211221	-0.0787202	0.22732	-0.501382
9164889	RUF20	RUF20	S000130127	RNA of Unknown Function	0.71249	0.000261767	0.861577	-0.259566	-0.419543	-0.416816	-0.292563	-0.694332	-0.33522	-0.273827	-0.489265	-0.475244	-0.355383	-0.934187	-0.41013	-0.491653	-0.535504	-0.784415	-0.306602	-0.558786	0.185712	0.375038	-0.664579	0.170962	-0.691321	-0.674951	-0.557247	-0.616861	-0.698614	-0.0326434	0.0299165	0.122738	0.0560787	-0.851041	-0.681659	-0.766228	-0.681999	-0.827995	-0.715989	-0.240975	0.09644	0.248204	-0.20521	-0.664687	-0.848083
855096	SDD2	YMR074C	S000004678	Protein with homology to human PDCD5; PDCD5 is involved in programmed cell death; N-terminal region forms a conserved triple-helix bundle structure; overproduction suppresses lethality due to expression of the dominant PET9 allele AAC2-A128P; overexpression promotes H2O2-induced apoptosis; YMR074C is not an essential gene; protein abundance increases in response to DNA replication stress	0.301832	2.91055e-05	0.383011	-0.23312	-0.644193	-0.567477	-0.722749	-0.626409	-0.13213	-0.101415	-0.305724	-0.274006	-0.353078	-0.288576	-0.0601147	-0.472398	-0.471513	-0.141042	-0.0480928	-0.653841	0.124024	-0.407194	-0.128395	0.593008	-0.430483	-0.697336	-0.330733	-0.0791027	0.337247	0.499329	-0.278989	-0.31222	-0.532715	-0.0727408	-0.0645697	-0.791321	-0.456822	-0.118572	0.291603	0.23983	-0.213481	-0.418759	-0.527933	0.129023	-0.200664
853863	SFT1	YKL006C-A	S000002101	Intra-Golgi v-SNARE; required for transport of proteins between an early and a later Golgi compartment	0.174738	1.82431e-05	0.998872	-0.444196	-0.491494	-0.522741	-0.470477	-0.537968	-0.577515	-0.407454	-0.362961	-0.405423	-0.341453	-0.419845	-0.479503	0.90227	0.421787	0.300566	-0.0291933	-0.157252	0.368747	0.130272	0.440178	0.120325	0.358939	0.725122	0.232072	0.15578	-0.287993	-0.389249	0.431572	0.0845493	0.573287	0.0249634	0.103465	0.825241	0.332473	0.232136	-0.158604	-0.274902	0.404692	0.109105	0.512063	0.0742822	0.236049
852561	SHG1	YBR258C	S000000462	Subunit of the COMPASS (Set1C) complex; COMPASS methylates histone H3 on lysine 4 and is required in transcriptional silencing near telomeres	0.521023	0.000444601	0.949861	-0.511378	-0.494574	-0.255987	-0.426318	-0.423084	-0.273471	-0.441023	-0.50044	-0.228714	-0.370204	-0.350483	-0.253875	-0.481138	0.0294472	0.241907	0.0561999	-0.489083	-0.518386	-0.287304	0.253464	0.560171	-0.117256	-0.0344936	0.711186	0.462463	0.375649	-0.00157542	-0.93408	0.279127	0.145297	0.476738	0.427519	-0.292444	0.406415	0.390926	0.237777	-0.278925	-0.806522	-0.0104036	0.223715	0.579692	0.167582
851314	SHR3	YDL212W	S000002371	Endoplasmic reticulum packaging chaperone; required for incorporation of amino acid permeases into COPII coated vesicles for transport to the cell surface	0.0325704	1.58177e-05	0.315982	-0.457132	-0.509191	-0.22458	-0.338949	-0.980415	-0.557562	-0.265352	-0.376714	-0.153856	-0.217815	-0.597472	-0.340623	-0.353829	0.142784	0.527136	0.699391	0.231323	-0.534438	-0.526618	-0.17744	0.653344	0.360059	-0.66243	0.0952223	0.114556	-0.0249353	0.221267	-0.782878	-0.0332446	0.185233	-0.252808	-0.0433302	-0.560635	0.144776	0.422306	0.476556	0.266264	-0.743764	-0.383455	-0.0362179	0.336538	0.230905
851650	SHU2	YDR078C	S000002485	Component of Shu complex (aka PCSS complex); Shu complex also includes Psy3, Csm2, Shu1, and promotes error-free DNA repair, Shu complex mediates inhibition of Srs2p function; promotes formation of Rad51p filaments; important for both mitotic and meiotic homologous recombination, and contains a conserved SWIM domain that is necessary for both	0.0209937	0.000993081	0.101412	-0.196374	-0.635876	-0.774397	0.10715	-0.169137	-0.513957	-0.106393	-0.370485	-0.465148	0.0625992	-0.101925	-0.37872	-0.357294	-0.63677	-0.937605	-0.729837	-0.715136	0.448164	0.452472	-0.33475	-0.208043	-0.885745	-0.528604	-0.359867	-0.129298	-0.503753	-0.775635	-0.0734044	-0.281728	0.463731	0.138432	-0.560844	-0.554215	-0.585135	-0.584579	-0.73378	-0.914017	0.185929	0.0441522	0.143872	-0.0141495	-0.855597
9164894	SNR10	snR10	S000007499	H/ACA box small nucleolar RNA (snoRNA); essential gene required for for preRNA processing, specifically for cleavage at sites A1 and A2; also guides pseudouridylation of large subunit (LSU) rRNA at position U2923	0.228572	4.39702e-05	0.389987	0.0034013	-0.578594	-0.560783	-0.666287	-0.572356	-0.45171	0.00439791	-0.627087	-0.569373	-0.754326	-0.625048	-0.612095	0.801623	0.418456	0.0725345	-0.130357	-0.409768	0.272313	0.431995	0.262205	0.244878	0.186268	-0.361645	-0.37834	-0.764422	-0.575762	-0.812883	0.116921	0.547014	-0.297293	0.0845954	-0.74346	0.538131	0.207932	-0.233008	-0.331816	-0.659206	0.275116	0.575628	0.107104	0.239488	-0.128833
9164878	SNR13	snR13	S000006498	C/D box small nucleolar RNA (snoRNA); guides 2'-O-methylation of large subunit (LSU) rRNA at positions A2280 and A2281	0.125859	1.85805e-05	0.19679	-0.0276971	-0.495922	-0.90135	-0.703134	-0.43044	-0.477868	-0.044567	-0.793661	-1.31201	-0.879062	-0.574729	-0.525456	0.804929	0.880344	0.5832	0.309061	0.43786	-0.308628	0.331112	0.39151	-0.0469255	0.770249	-0.156062	0.223839	0.685003	0.705486	0.745782	-0.439198	-0.635892	0.0266514	0.146595	0.585754	0.55922	0.818654	0.823993	0.616392	0.740126	-0.476304	-0.0699781	0.325821	0.0395552	0.920891
9164873	SNR189	snR189	S000007314	H/ACA box small nucleolar RNA (snoRNA); guides pseudouridylation of large subunit (LSU) rRNA at position U2735 and small subunit (SSU) rRNA at position U466	0.89699	0.000589863	0.107557	0.112964	-0.30253	-0.307919	-0.564019	-0.249401	-0.855771	0.307192	-0.759414	-0.683064	-1.73501	-0.547225	-2.38886	0.802344	0.721147	0.610332	0.5948	0.728333	-0.109842	0.0933402	0.0664765	0.0240363	0.875944	-0.513202	-0.446111	-0.621076	-0.232713	-0.660957	0.0510883	0.26897	-0.538899	0.366596	-0.625428	0.532253	0.49798	0.106672	0.58555	0.230964	-0.0976466	0.486784	-0.597553	0.509705	0.496861
9164901	SNR32	snR32	S000007297	H/ACA box small nucleolar RNA (snoRNA); guides pseudouridylation of large subunit (LSU) rRNA at position U2191	0.328049	9.16477e-06	0.0425538	0.207639	-0.822719	-0.771516	-0.673151	-0.65828	-0.417114	0.279553	-1.35603	-1.01201	-0.808107	-1.1115	-0.592872	0.759548	0.537279	0.149553	-0.288741	-0.168903	0.0799377	0.478963	0.565879	-0.196329	0.241277	-0.797376	-0.200404	-0.138721	-0.317912	0.0600141	-0.543883	-0.0673792	0.216016	-0.462144	-0.344588	-0.0859314	0.282352	0.000330655	-0.55336	-0.0915802	-0.443081	0.356706	0.700395	-0.608371	-0.113445
9164927	SNR34	snR34	S000006500	H/ACA box small nucleolar RNA (snoRNA); guides pseudouridylation of large subunit (LSU) rRNA at positions U2826 and U2880	0.652632	0.00939213	0.894302	-0.214616	-0.256972	-0.257596	-0.0676323	-0.448513	-0.388338	-0.321124	-0.46779	-0.385158	-0.109432	-0.784276	-0.772951	-0.408518	0.0373893	-0.373708	-0.0264611	-0.407121	-0.455812	0.548676	-0.467911	0.37365	-0.284381	-0.453928	-0.1828	-0.460079	-0.83946	-0.661158	-0.222702	0.386035	0.444581	-0.400684	-0.6602	-0.525622	-0.119776	-0.514382	-0.640231	-0.680062	-0.374116	0.538609	0.11972	-0.129774	-0.623479
9164977	SNR35	snR35	S000007299	H/ACA box small nucleolar RNA (snoRNA); predicted to guide pseudouridylation of small subunit (SSU) rRNA at position 1191	0.0185992	0.00393262	0.377989	-0.0268095	-0.564342	-0.612223	-0.373461	-0.12652	-0.135696	-0.0745105	-1.69979	-1.1492	-0.630165	-0.21371	-0.183082	0.844757	0.859686	0.515847	0.334981	0.445755	-0.242669	0.395344	0.26836	-0.0220338	0.762397	0.218738	0.722623	0.848686	0.812849	0.71091	-0.695316	-0.224578	0.11045	0.317272	0.875166	0.589457	0.906709	0.798777	0.679319	0.676459	-0.557449	0.0752344	0.212393	0.182819	0.947889
9164972	SNR36	snR36	S000007300	H/ACA box small nucleolar RNA (snoRNA); guides pseudouridylation of small subunit (SSU) rRNA at position U1187	0.741472	0.0056646	0.373654	0.176332	-0.328847	-0.437945	-0.348454	-0.500992	-0.273379	0.231443	-0.388801	-0.477901	-0.436252	-0.585332	-0.302212	0.916264	0.687654	0.308461	0.404389	0.18496	0.0464428	0.455977	-0.0976717	0.326556	0.632047	-0.58028	-0.34559	-0.440721	-0.0093871	0.485607	-0.14314	0.154149	-0.579415	-0.497481	-0.247672	0.718687	0.583014	0.122848	0.436943	0.437642	-0.0187738	0.572643	-0.387877	0.115052	0.569833
9164897	SNR46	snR46	S000006506	H/ACA box small nucleolar RNA (snoRNA); guides pseudouridylation of large subunit (LSU) rRNA at position U2865	0.116171	0.00403442	0.441772	-0.00273912	-0.149424	-0.498216	-0.135005	-0.467651	-0.562683	-0.00384314	-0.193921	-0.542809	-0.197375	-0.672715	-0.994782	0.427111	0.37508	-0.327333	-0.0592304	-0.187763	-0.0473309	0.913606	-0.364242	0.112842	0.0435795	-0.301418	-0.499548	-0.813338	-0.893373	-0.837931	0.330466	0.459323	0.0388302	-0.292106	-0.87123	0.0845723	-0.0678545	-0.696818	-0.577666	-0.624458	0.170402	0.84905	-0.204183	-0.106238	-0.500001
9164975	SNR50	snR50	S000006441	C/D box small nucleolar RNA (snoRNA); guides 2'-O-methylation of large subunit (LSU) rRNA at position G867	0.0155121	0.000363922	0.925859	-0.242295	-0.590202	-0.456704	-0.361754	-0.328667	-0.383227	-0.309081	-0.750155	-0.578699	-0.746754	-0.665379	-0.675933	-0.209227	-0.642127	-0.946575	-0.605042	-0.249302	0.603006	0.45773	-0.504639	-0.516022	-0.72144	-0.61809	-0.694941	-0.957113	-0.591324	-0.277479	0.260948	0.405063	-0.53613	-0.470493	-0.830686	-0.406197	-0.686902	-0.981232	-0.61767	-0.270258	0.462673	0.447591	-0.535164	-0.511039	-0.794986
9164978	SNR62	snR62	S000006453	C/D box small nucleolar RNA (snoRNA); guides 2'-O-methylation of large subunit (LSU) rRNA at position U1888	0.80434	0.00238096	0.865209	-0.261868	-0.263982	-0.53982	-0.155449	-0.44222	-0.264977	-0.466499	-0.638692	-1.0692	-0.348575	-0.898679	-0.543337	-0.291748	0.187793	-0.283944	0.159834	-0.113074	-0.529289	0.618491	-0.583127	0.315251	-0.0755154	-0.843126	-0.279434	0.0194429	-0.0633948	0.17298	-0.489666	-0.379545	0.106274	-0.253169	-0.235175	-0.666499	0.0113641	-0.22194	0.0982871	-0.0044416	-0.680874	0.312138	-0.422088	0.128766	-0.181122
9164971	SNR8	snR8	S000006497	H/ACA box small nucleolar RNA (snoRNA); guides pseudouridylation of large subunit (LSU) rRNA at positions U960 and U986	0.0454331	9.85324e-05	0.0195646	0.111713	-0.225044	-0.324359	-0.595279	-0.444831	-1.19655	0.213814	-0.464333	-0.450962	-0.926171	-0.59684	-1.57369	0.602279	0.835621	0.764156	0.737886	0.771207	-0.454708	0.0317635	0.0918625	0.162154	0.95777	-0.272831	0.20535	-0.210284	-0.00191014	-0.486004	-0.53258	0.541874	-0.279709	0.483587	-0.171002	0.513713	0.911243	0.69798	0.742367	0.611345	-0.638928	0.216203	-0.00259028	0.327684	0.906295
9164955	SNR83	snR83	S000028468	H/ACA box small nucleolar RNA (snoRNA); guides pseudouridylation of small subunit (SSU) rRNA at positions U1290 and U1415	0.422722	9.34883e-05	0.644146	-0.175062	-0.366936	-0.545614	-0.754767	-0.395172	-0.42629	-0.242703	-0.488568	-0.633225	-0.858354	-0.45614	-0.592435	0.628479	0.714556	0.415332	-0.113916	-0.303137	-0.275371	0.346623	0.701321	0.159043	0.358385	-0.0502959	0.151849	-0.061672	0.0338747	-0.70194	-0.242371	0.274817	-0.12559	0.744788	-0.130942	0.521197	0.658904	0.335413	-0.0866151	-0.481804	-0.312258	0.383452	0.559564	0.372244	0.264762
9164974	SNR9	snR9	S000007292	H/ACA box small nucleolar RNA (snoRNA); guides pseudouridylation of large subunit (LSU) rRNA at position U2340 and U2345	0.595247	0.0013729	0.827367	-0.128613	-0.224664	-0.37337	-0.327237	-0.556323	-0.451526	-0.20249	-0.376699	-0.486155	-0.447607	-0.777151	-0.718482	0.569063	0.910965	0.525884	0.399422	-0.0377957	-0.583227	0.446742	0.200314	0.543029	0.631597	-0.185192	0.139423	-0.323688	-0.68755	-0.652041	-0.36155	0.610631	0.435416	-0.217648	-0.428763	0.355019	0.762076	0.260272	0.00134094	-0.318888	-0.608939	0.614766	0.347495	0.320584	0.294807
1466445	SUS1	YBR111W-A	S000028510	Component of both the SAGA histone acetylase and TREX-2 complexes; interacts with RNA polymerase II; involved in mRNA export coupled transcription activation and elongation; involved in post-transcriptional tethering of active genes to the nuclear periphery and to non-nascent mRNP	0.0158868	0.00159631	0.979235	-0.289844	-0.46078	-0.382942	-0.373139	-0.199767	-0.324984	-0.37512	-0.67924	-0.414671	-0.363411	-0.183222	-0.347204	0.54411	0.937377	0.789702	0.454489	0.0921407	-0.64159	0.126202	0.484609	0.482747	0.754234	0.331491	0.851332	0.793958	0.594923	0.0992357	-0.745368	0.0116522	0.312683	0.653289	0.725644	0.430748	0.9011	0.802687	0.540257	0.0973998	-0.709063	0.0628932	0.39354	0.585978	0.748106
851745	TAF10	YDR167W	S000002574	Subunit (145 kDa) of TFIID and SAGA complexes; involved in RNA polymerase II transcription initiation and in chromatin modification	0.248907	0.000321067	0.832977	-0.31733	-0.485055	-0.379227	-0.323242	-0.6501	-0.231186	-0.253337	-0.494086	-0.32398	-0.277805	-0.550203	-0.216909	-0.383445	0.123474	0.0270234	0.0317756	-0.590872	-0.539628	0.119928	-0.0039375	0.631065	-0.161849	-0.641076	0.142532	0.000554412	-0.181171	-0.0756933	-0.821367	0.179547	0.229909	-0.153472	-0.166915	-0.581291	0.151107	0.0157738	-0.084098	-0.380786	-0.772428	0.169975	0.127539	0.274409	-0.186828
851652	TFB5	YDR079C-A	S000007603	Component of RNA polymerase II general transcription factor TFIIH; involved in transcription initiation and in nucleotide-excision repair; relocalizes to the cytosol in response to hypoxia; homolog of Chlamydomonas reinhardtii REX1-S protein involved in DNA repair	0.230459	3.58023e-05	0.664975	-0.187382	-0.514014	-0.544627	-0.398932	-0.759246	-0.477093	-0.26932	-0.716653	-0.648962	-0.462368	-0.81771	-0.647353	0.68277	0.706138	0.507205	0.455077	-0.195726	-0.210432	0.212715	0.104855	0.771357	0.575302	0.0738244	0.576846	0.424691	-0.0678999	-0.433634	-0.655835	0.159876	0.65567	0.347747	0.186303	0.555375	0.743654	0.537654	0.33056	-0.298707	-0.385282	0.219318	0.30321	0.716836	0.50993
851922	TIM11	YDR322C-A	S000007255	Subunit e of mitochondrial F1F0-ATPase; ATPase is a large, evolutionarily conserved enzyme complex required for ATP synthesis; essential for the dimeric and oligomeric state of ATP synthase, which in turn determines the shape of inner membrane cristae	0.317409	0.000295859	0.820239	-0.507533	-0.543244	-0.452715	-0.43115	-0.354872	-0.119185	-0.564449	-0.795534	-0.587392	-0.624722	-0.501041	-0.180276	-0.784384	-0.632913	-0.752922	-0.694827	-0.701271	0.016195	0.209572	-0.131257	-0.177623	-0.911121	-0.826323	-0.175938	-0.254456	0.0062549	0.0947239	-0.603777	0.118842	-0.3493	-0.086812	-0.280982	-0.90144	-0.5191	-0.63669	-0.485268	-0.452254	-0.244824	0.197594	-0.240388	-0.161567	-0.759036
853600	TIM8	YJR135W-A	S000007348	Mitochondrial intermembrane space protein; forms a complex with Tim13p that delivers a subset of hydrophobic proteins to the TIM22 complex for inner membrane insertion; homolog of human TIMM8A, implicated in Mohr-Tranebjaerg syndrome, also known as deafness-dystonia-optic neuronopathy (DDON) syndrome; human TIMM8A can complement yeast null mutant	0.307448	9.24973e-06	0.951258	-0.426599	-0.551503	-0.702424	-0.45748	-0.44489	-0.6067	-0.576507	-0.652022	-0.708698	-0.480787	-0.498865	-0.662514	0.780716	0.732261	0.173103	0.0779496	0.229497	-0.14553	0.694003	0.133643	-0.130898	0.494766	0.78637	0.884075	0.583618	0.170815	0.0235019	-0.331906	0.33527	0.56694	0.192563	0.638772	0.824164	0.831468	0.346025	0.119114	0.159417	-0.227569	0.587492	0.313573	-0.00874882	0.578327
850967	TMA7	YLR262C-A	S000007246	Protein of unknown that associates with ribosomes; null mutant exhibits translation defects, altered polyribosome profiles, and resistance to the translation inhibitor anisomcyin; protein abundance increases in response to DNA replication stress	0.165114	9.72252e-05	0.964576	-0.382167	-0.441463	-0.486158	-0.489317	-0.574094	-0.282776	-0.532197	-0.793258	-0.88728	-0.940944	-1.17025	-0.727117	-0.637647	-0.562335	-0.616489	-0.660826	-0.878996	0.0736563	0.115803	0.00877927	0.0431108	-0.849073	-0.904081	-0.782578	-0.729557	-0.662875	-0.46361	0.0858113	-0.011088	-0.140326	-0.374868	-0.91103	-0.802796	-0.700653	-0.704251	-0.695618	-0.717249	0.0834682	0.0585882	-0.0649575	-0.162646	-0.923292
852350	TSC3	YBR058C-A	S000007521	Protein that stimulates the activity of serine palmitoyltransferase; involved in sphingolipid biosynthesis; Lcb1p and Lcb2p are the two components of serine palmitoyltransferase	0.0260555	2.11461e-05	0.886164	-0.270539	-0.479592	-0.49379	-0.494564	-0.672143	-0.588676	-0.329264	-0.565377	-0.542618	-0.483116	-0.567007	-0.557644	0.633906	0.779213	0.865204	0.819531	0.304951	-0.35173	-0.175157	0.124159	0.731682	0.899476	0.376452	0.738852	0.913526	0.780961	0.251425	-0.55813	-0.291042	0.237778	0.736421	0.823976	0.54846	0.775019	0.894561	0.816536	0.28953	-0.43187	-0.21985	0.167334	0.743315	0.884076
852997	VMA21	YGR105W	S000003337	Integral membrane protein required for V-ATPase function; not an actual component of the vacuolar H+-ATPase (V-ATPase) complex; diverged ortholog of human XMEA (X-linked Myopathy with Excessive Autophagy); functions in the assembly of the V-ATPase; localized to the yeast endoplasmic reticulum (ER)	0.039994	1.11642e-08	0.49724	-0.614341	-0.843911	-0.775843	-0.529489	-1.14991	-0.912881	-0.483797	-0.608999	-0.531012	-0.348749	-0.702879	-0.588829	0.690464	0.683141	0.683515	0.841405	0.306048	-0.173649	-0.0529188	-0.147271	0.758255	0.838384	0.675236	0.897291	0.849929	0.400076	0.218794	-0.459756	-0.00530623	0.634239	0.287266	0.802034	0.754056	0.833282	0.815529	0.75802	0.3036	-0.299973	-0.0401186	0.135319	0.655227	0.908803
3799971	WIP1	YDR374W-A	S000113553	Kinetochore localized protein of unknown function; interacts with Cnn1p (CENP-T); orthologous to human centromere constitutive-associated network (CCAN) subunit CENP-W and fission yeast new1	0.660632	3.60548e-05	0.892876	-0.305363	-0.595077	-0.438315	-0.54701	-0.628417	-0.357337	-0.586935	-0.872617	-0.757105	-0.937514	-1.04209	-0.683596	0.594822	-0.0522964	0.0176755	-0.0880479	-0.489723	0.660973	-0.0898645	0.135087	0.37835	-0.0106293	0.153095	-0.62247	-0.676166	-0.511605	-0.34263	0.940463	0.119803	-0.260038	-0.304505	-0.552355	0.529824	-0.20306	-0.159159	-0.204055	-0.491858	0.786677	-0.0433197	0.0445781	0.233747	-0.150687
856806	YOS1	YER074W-A	S000007651	Integral membrane protein required for ER to Golgi transport; localized to the Golgi, the ER, and COPII vesicles; interacts with Yip1p and Yif1p	0.484645	0.000342554	0.91163	-0.304305	-0.445393	-0.552427	-0.382942	-0.486056	-0.204819	-0.271951	-0.40925	-0.467527	-0.370289	-0.433619	-0.211659	0.0037738	-0.0679558	-0.549408	-0.396148	-0.792158	0.0897318	0.65115	-0.236016	0.291067	-0.460994	-0.637268	-0.399909	-0.728018	-0.393938	-0.566815	-0.131419	0.470889	-0.478442	0.0685191	-0.695017	-0.195124	-0.175245	-0.638632	-0.41979	-0.770809	0.0265456	0.635145	-0.325817	0.239812	-0.562002
852460	YSY6	YBR162W-A	S000002158	Protein of unknown function; expression suppresses a secretory pathway mutation in E. coli; has similarity to the mammalian RAMP4 protein involved in secretion	0.0262035	0.00377374	0.535285	-0.171976	-0.51647	-0.440553	-0.459427	-0.282229	0.0436837	-0.148525	-0.467376	-0.399172	-0.445518	-0.297071	0.0563835	-0.214488	-0.484534	-0.69852	-0.871983	-0.908098	0.398405	0.32427	0.165818	-0.194883	-0.823909	-0.827457	-0.712092	-0.802676	-0.706988	-0.598288	0.0732766	0.17617	-0.182627	-0.295989	-0.937826	-0.459952	-0.606865	-0.791253	-0.877561	-0.862373	0.307678	0.293948	0.0484589	-0.247664	-0.929951
854040	ZEO1	YOL109W	S000005469	Peripheral membrane protein of the plasma membrane; interacts with Mid2p; regulates the cell integrity pathway mediated by Pkc1p and Slt2p; the authentic protein is detected in a phosphorylated state in highly purified mitochondria	0.127056	3.07032e-05	0.247429	-0.175384	-0.350608	-0.524871	-0.391254	-0.998262	-0.474208	-0.296041	-0.570485	-0.669124	-0.530487	-1.22801	-0.79428	0.540502	0.681259	0.446834	0.459726	-0.241454	-0.32123	0.262242	0.017977	0.822967	0.511019	0.0278104	0.237246	-0.217385	-0.661181	-0.671659	-0.272285	0.591748	0.544682	-0.164676	-0.32116	0.487627	0.673812	0.332745	0.21425	-0.410842	-0.364685	0.405887	0.175418	0.681849	0.359302
852429	AGP2	YBR132C	S000000336	Plasma membrane regulator of polyamine and carnitine transport; has similarity to transporters but lacks transport activity; may act as a sensor that transduces environmental signals; has a positive or negative regulatory effect on transcription of many transporter genes	4.4853e-14	7.09788e-08	3.57839e-06	0.0074656	0.666183	0.735145	0.318182	2.68083	0.134216	0.00255136	0.384773	0.474393	0.198972	1.15891	0.0390428	-0.493419	-0.168748	0.131968	0.369679	0.749513	-0.279968	-0.390505	-0.290557	-0.281901	0.149983	-0.231925	0.0924698	0.417008	0.843247	0.569452	-0.348891	-0.442508	-0.507158	0.49718	0.454024	-0.402724	-0.0489689	0.291126	0.647647	0.723947	-0.340783	-0.452528	-0.428629	0.0952692	0.320581
856365	AIM17	YHL021C	S000001013	Protein of unknown function; the authentic, non-tagged protein is detected in highly purified mitochondria in high-throughput studies; null mutant displays reduced frequency of mitochondrial genome loss	6.51812e-13	5.2742e-10	2.11937e-08	0.157272	0.142909	0.368602	0.374605	2.74554	2.10058	0.449918	0.31864	0.690652	0.6409	2.24686	1.12883	0.368853	0.465258	0.585819	0.722275	0.977898	-0.219656	-0.19745	-0.127655	-0.0642837	0.793186	0.393529	0.587204	0.752916	0.990268	0.691065	-0.349232	-0.267382	-0.242457	0.561535	0.892533	0.403707	0.580446	0.741483	0.9628	0.794049	-0.330506	-0.260591	-0.223052	0.423808	0.904432
854819	AIM21	YIR003W	S000001442	Protein of unknown function; involved in mitochondrial migration along actin filament; may interact with ribosomes; GFP-fusion protein colocalizes with Sac1p to the actin cytoskeleton	2.11231e-12	1.23639e-09	4.09082e-06	0.0208097	0.466536	0.708164	0.594367	2.49238	1.25463	0.0144728	0.265926	0.404987	0.294156	0.925777	0.420176	0.445058	0.548585	0.775386	0.811182	0.896052	-0.248854	-0.346379	0.0142173	0.13002	0.894995	0.553243	0.66742	0.811445	0.954567	0.547	-0.290983	-0.244441	-0.118775	0.660441	0.92537	0.540946	0.656473	0.834236	0.947759	0.686681	-0.289434	-0.288865	-0.0795861	0.51215	0.95494
853829	AIM26	YKL037W	S000001520	Protein of unknown function; null mutant is viable and displays elevated frequency of mitochondrial genome loss; null mutation confers sensitivity to tunicamycin and DTT	1.06957e-09	0.414305	0.00213113	0.275137	-0.096778	0.452526	-0.114235	0.80355	-0.790395	1.49353	-0.178888	0.682756	-0.199533	0.919851	-0.522041	0.515431	0.496548	0.58848	0.687653	0.940299	-0.112658	-0.161439	-0.0802916	-0.0704791	0.816826	0.593699	0.727595	0.626011	0.896691	0.614361	-0.326644	0.080461	-0.294352	0.519874	0.895243	0.584165	0.630103	0.644531	0.824615	0.862899	-0.21286	-0.0677044	-0.178336	0.180165	0.906015
855206	ALD2	YMR170C	S000004780	Cytoplasmic aldehyde dehydrogenase; involved in ethanol oxidation and beta-alanine biosynthesis; uses NAD+ as the preferred coenzyme; expression is stress induced and glucose repressed; very similar to Ald3p	2.22045e-16	1.6625e-08	4.43631e-05	0.0255526	0.619178	0.561057	0.244893	2.01574	1.51764	0.0175026	0.413342	0.379688	0.137781	0.759866	0.397869	0.249091	0.472967	0.70706	0.824887	0.933982	-0.34917	-0.35036	-0.0947872	0.109426	0.823415	0.392969	0.538275	0.735077	0.961221	0.804856	-0.287901	-0.30534	-0.22965	0.411004	0.890496	0.341459	0.520475	0.73526	0.921544	0.869035	-0.316896	-0.3281	-0.179216	0.296635	0.877448
855205	ALD3	YMR169C	S000004779	Cytoplasmic aldehyde dehydrogenase; involved in beta-alanine synthesis; uses NAD+ as the preferred coenzyme; very similar to Ald2p; expression is induced by stress and repressed by glucose	2.9261e-12	1.45516e-10	1.06646e-09	0.383704	-0.0102125	0.39663	0.247587	2.12908	3.48526	0.457599	-0.0147421	0.485773	0.271102	1.5898	1.60166	0.242035	0.415351	0.620888	0.613779	0.963476	-0.283347	-0.307627	0.0566324	-0.1871	0.728908	0.258644	0.508292	0.677464	0.915056	0.881253	-0.384301	-0.265969	-0.248551	0.276212	0.839968	0.260683	0.50334	0.680862	0.886238	0.908823	-0.375998	-0.276792	-0.20754	0.212189	0.838103
852721	AMS1	YGL156W	S000003124	Vacuolar alpha mannosidase; involved in free oligosaccharide (fOS) degradation; delivered to the vacuole in a novel pathway separate from the secretory pathway	1.99962e-12	2.50244e-13	1.52389e-12	-0.00083807	0.483945	0.512188	0.582084	4.82563	4.24493	-0.00076173	0.403119	0.381345	0.432714	2.14068	1.60735	0.145689	0.376484	0.295956	0.299809	0.893545	-0.33053	0.0791517	0.0178357	-0.514314	0.500101	0.406925	0.573901	0.742681	0.994372	0.637487	-0.319009	-0.270478	-0.261381	0.620304	0.878229	0.406482	0.590284	0.744862	0.9877	0.702962	-0.340175	-0.25268	-0.250015	0.54639	0.895739
853758	APE1	YKL103C	S000001586	Vacuolar aminopeptidase yscI; zinc metalloproteinase that belongs to the peptidase family M18; often used as a marker protein in studies of autophagy and cytosol to vacuole targeting (CVT) pathway; protein increases in abundance and relative distribution to cytoplasmic foci increases upon DNA replication stress	1e-16	1.17828e-12	3.18634e-13	-0.250349	0.124017	0.233169	0.368087	4.25014	2.57541	-0.263211	0.163236	0.333021	0.322553	1.81644	0.709655	0.115461	0.33865	0.595845	0.733993	0.965935	-0.312902	-0.371048	-0.129025	-0.0374994	0.706503	0.331351	0.537701	0.770908	0.99132	0.69299	-0.348793	-0.354139	-0.219649	0.560941	0.871278	0.27674	0.498186	0.750063	0.954059	0.813923	-0.35342	-0.376154	-0.200485	0.392876	0.858456
856513	APE4	YHR113W	S000001155	Cytoplasmic aspartyl aminopeptidase with possible vacuole function; Cvt pathway cargo protein; cleaves unblocked N-terminal acidic amino acids from peptide substrates; forms a 12-subunit homo-oligomer; M18 metalloprotease family	1e-16	7.02217e-10	4.24613e-07	-0.0129023	0.269168	0.734008	0.547561	2.47068	1.37388	-0.0104696	0.22414	0.477437	0.293719	0.91084	0.393561	0.328681	0.588202	0.768896	0.83548	0.901038	-0.415342	-0.287559	-0.0252253	0.155769	0.88643	0.455601	0.69811	0.821246	0.961511	0.675806	-0.427446	-0.218771	-0.114409	0.54042	0.945428	0.417403	0.672013	0.820055	0.935288	0.777725	-0.432634	-0.250182	-0.0828372	0.405331	0.944543
855630	APP1	YNL094W	S000005038	Phosphatidate phosphatase, converts phosphatidate to diacylglycerol; App1p, Pah1p, Dpp1p, and Lpp1p are responsible for all the phosphatidate phosphatase activity; component of cortical actin patches; interacts with components of endocytic pathway	4.41144e-08	1.43558e-08	3.02773e-05	0.0690409	0.436515	0.70122	0.321519	2.0489	1.10514	0.0411924	0.250512	0.432395	0.182029	0.893287	0.457412	0.0349586	0.157371	0.618564	0.674759	0.879029	-0.164102	-0.63083	-0.0236186	-0.0255196	0.610235	0.427243	0.543952	0.720578	0.982482	0.513265	-0.260808	-0.278705	-0.275996	0.729487	0.837535	0.353605	0.483631	0.762148	0.989209	0.672746	-0.258145	-0.410778	-0.228733	0.578515	0.853645
852446	ARA1	YBR149W	S000000353	NADP+ dependent arabinose dehydrogenase; involved in carbohydrate metabolism; purified as homodimer; naturally occurs with a N-terminus degradation product	1e-16	1.39511e-12	1.22615e-11	0.0617209	0.0234071	0.474376	0.603102	3.97693	2.5072	0.0965353	0.0271282	0.440588	0.42271	1.52843	0.680642	0.425396	0.560507	0.710388	0.800818	0.932156	-0.283595	-0.244094	-0.0598784	0.0808076	0.879984	0.434413	0.640348	0.804606	0.978636	0.675184	-0.37557	-0.269509	-0.158394	0.562703	0.924581	0.444479	0.633352	0.797817	0.949636	0.779739	-0.356654	-0.269251	-0.130821	0.421466	0.937669
855057	ARA2	YMR041C	S000004644	NAD-dependent arabinose dehydrogenase; involved in biosynthesis of dehydro-D-arabinono-1,4-lactone; similar to plant L-galactose dehydrogenase	1.20592e-07	7.20686e-07	0.000159169	-0.167394	0.287363	0.563937	0.279913	1.50494	1.14052	-0.101942	0.161187	0.306792	0.148971	0.675515	0.462753	0.229083	0.399953	0.663692	0.685747	0.956341	-0.276822	-0.38453	0.023027	-0.0889321	0.752671	0.570418	0.679866	0.747559	0.952568	0.645138	-0.289551	-0.142987	-0.201957	0.559775	0.934713	0.519843	0.651314	0.772142	0.943905	0.762245	-0.304012	-0.212083	-0.158018	0.431711	0.946157
852720	ARI1	YGL157W	S000003125	NADPH-dependent aldehyde reductase; utilizes aromatic and alophatic aldehyde substrates; member of the short-chain dehydrogenase/reductase superfamily	1e-16	1e-16	1e-16	0.0109261	0.178461	0.710774	1.24343	6.38338	5.34036	0.0100755	0.165797	0.490759	0.658049	2.042	1.35381	0.346655	0.598507	0.723629	0.722752	0.92859	-0.410403	-0.213792	0.0566329	-0.0143726	0.85484	0.412293	0.64332	0.815936	0.979657	0.6447	-0.40145	-0.28095	-0.144486	0.594479	0.917521	0.413432	0.655639	0.82507	0.963891	0.717216	-0.415893	-0.277621	-0.11229	0.50202	0.935316
855147	ASI1	YMR119W	S000004725	Subunit of the inner nuclear membrane Asi ubiquitin ligase complex; the Asi complex targets both misfolded proteins of the inner nuclear membrane-associated degradation (INMAD) pathway and regulators of sterol biosynthesis for ubiquitin-mediated degradation; acts with Asi2p and Asi3p to ensure the fidelity of SPS-sensor signaling by targeting latent unprocessed forms of Stp1p and Stp2p, maintaini…	2.22045e-16	2.62296e-11	1.43269e-06	0.0893556	0.511141	1.04397	0.72322	2.56689	1.49948	0.0443311	0.236144	0.451252	0.287368	0.729825	0.357172	0.32603	0.511296	0.732747	0.870027	0.909681	-0.320714	-0.33634	-0.117424	0.190826	0.865462	0.487053	0.668311	0.785847	0.971041	0.669522	-0.358301	-0.20897	-0.173956	0.558758	0.934962	0.437255	0.624439	0.784578	0.95593	0.777624	-0.352605	-0.262761	-0.156545	0.431543	0.931033
850432	ATG15	YCR068W	S000000664	Phospholipase; preferentially hydrolyses phosphatidylserine, with minor activity against cardiolipin and phosphatidylethanolamine; required for lysis of autophagic and CVT bodies; targeted to intravacuolar vesicles during autophagy via the multivesicular body (MVB) pathway; required for the maintenance of lipid droplet quantity after the diauxic shift; regulates lipolysis; expression regulated by…	6.21387e-07	7.19663e-05	0.00473484	-0.279575	0.458523	0.528003	0.197227	1.16923	0.544939	-0.217572	0.386195	0.419267	0.151554	0.669814	0.282308	-0.141678	0.299953	0.600737	0.750612	0.83188	-0.521092	-0.42656	-0.143485	0.117577	0.616476	0.482389	0.615533	0.717622	0.979373	0.586954	-0.296206	-0.184196	-0.276028	0.651865	0.883684	0.271799	0.544949	0.738793	0.979728	0.744615	-0.417513	-0.301883	-0.248074	0.494654	0.858947
854072	ATG19	YOL082W	S000005442	Receptor protein for the cytoplasm-to-vacuole targeting (Cvt) pathway; delivers cargo proteins aminopeptidase I (Ape1p) and alpha-mannosidase (Ams1p) to the phagophore assembly site for packaging into Cvt vesicles; interaction with Atg19p during the Cvt pathway requires phosphorylation by Hrr25p	2.05613e-13	2.40151e-06	2.05866e-06	-0.128217	0.30466	0.275009	0.0335021	2.27828	0.946442	-0.0782272	0.256165	0.247238	0.0243683	1.08935	0.327514	-0.140093	0.185355	0.497049	0.634948	0.907546	-0.374551	-0.432404	-0.136292	-0.104393	0.539418	0.191674	0.429857	0.702969	0.986175	0.691423	-0.352057	-0.399401	-0.304292	0.556	0.789378	0.0682112	0.358424	0.66591	0.908544	0.827161	-0.385163	-0.440038	-0.255815	0.322066	0.740061
855741	ATG3	YNR007C	S000005290	E2-like enzyme; involved in autophagy and cytoplasm-to-vacuole targeting (Cvt) pathway; plays a role in formation of Atg8p-phosphatidylethanolamine conjugates, which are involved in membrane dynamics during autophagy and Cvt; interaction with Atg8p regulated by acetylation by NuA4 histone acetyltransferase Esa1p while attenuation of Atg3 acetylation is mediated by histone deacetylase Rpd3p; Atg12…	2.60325e-12	5.60667e-06	0.000240245	-0.231677	0.3343	0.42373	0.588241	1.70798	0.753637	-0.141847	0.209017	0.280401	0.340388	0.734429	0.247941	0.0605346	0.26719	0.54165	0.759359	0.955803	-0.277437	-0.388728	-0.233822	0.004718	0.663716	0.415697	0.572866	0.797234	0.975394	0.727978	-0.308927	-0.344977	-0.164185	0.505809	0.910337	0.283808	0.469478	0.725768	0.92918	0.859399	-0.31004	-0.379872	-0.20161	0.315931	0.848018
851585	ATG31	YDR022C	S000002429	Autophagy-specific protein required for autophagosome formation; forms a complex with Atg17p and Atg29p that localizes other proteins to the pre-autophagosomal structure; constitutively phosphorylated, and phosphorylation of residue S174 is required for function; high-copy suppressor of CIK1 deletion	3.79168e-10	7.66282e-08	0.000420942	0.233058	0.0533656	0.451626	0.59836	1.31181	1.46617	0.158081	0.0344108	0.287269	0.391914	0.64701	0.569254	0.294575	0.276499	0.446738	0.797942	0.935032	-0.0551722	-0.249615	-0.409963	0.0742929	0.695688	0.371843	0.580103	0.722309	0.94626	0.829902	-0.361936	-0.235301	-0.227855	0.367033	0.895029	0.35548	0.497282	0.651253	0.919743	0.880262	-0.273537	-0.244731	-0.289645	0.28313	0.851464
851070	ATG33	YLR356W	S000004348	Mitochondrial mitophagy-specific protein; required primarily for mitophagy induced at post-log phase; not required for other types of selective autophagy or macroautophagy; conserved within fungi, but not in higher eukaryotes; ATG33 has a paralog, SCM4, that arose from the whole genome duplication	9.99201e-16	1.40548e-08	3.50516e-06	0.634935	-0.0171708	0.532737	0.231624	2.32985	1.0177	0.624076	-0.016487	0.491714	0.165128	1.07513	0.334037	0.396417	0.49651	0.713201	0.785809	0.93614	-0.231624	-0.328819	-0.0371191	0.0578384	0.853546	0.316111	0.581048	0.774547	0.98517	0.703089	-0.418863	-0.30419	-0.206989	0.543063	0.881489	0.361662	0.568004	0.778563	0.9397	0.827096	-0.356812	-0.326077	-0.144085	0.361541	0.903514
854071	ATG34	YOL083W	S000005443	Receptor protein involved in selective autophagy during starvation; specifically involved in the transport of cargo protein alpha-mannosidase (Ams1p); Atg19p paralog	8.90399e-14	9.90541e-12	4.51896e-10	0.315496	0.0527311	0.623763	0.207123	3.64723	3.08247	0.292179	0.0389695	0.513305	0.134724	1.73102	1.06539	0.436401	0.314303	0.584636	0.452175	0.855954	0.0388361	-0.386807	0.212411	-0.283992	0.664747	0.393321	0.567886	0.756941	0.987608	0.715238	-0.325004	-0.297218	-0.233693	0.533999	0.892874	0.437051	0.553976	0.778829	0.940378	0.809977	-0.263679	-0.344178	-0.144586	0.379517	0.912622
854323	ATG40	YOR152C	S000005678	Autophagy receptor with a role in endoplasmic reticulum degradation; involved specifically in autophagy of cortical and cytoplasmic ER in response to nitrogen starvation or rapamycin treatment; localizes to the cortical and cytoplasmic ER; similar to human FAM134B, which is also involved in ER autophagy and is associated with sensory neuropathy	7.77156e-14	1.11022e-16	1.57013e-10	0.809411	0.605658	1.28188	1.60317	4.28007	2.64094	0.481838	0.614009	1.06546	1.23633	1.92969	1.03888	-0.388973	0.00386129	0.276886	0.577099	0.791738	-0.393857	-0.366597	-0.358498	-0.0617584	0.329315	0.185761	0.557715	0.753568	0.961744	0.508641	-0.519699	-0.305557	-0.205502	0.707879	0.791564	0.0410283	0.454433	0.690821	0.944912	0.637287	-0.533789	-0.352016	-0.268396	0.557942	0.736528
852200	ATG8	YBL078C	S000000174	Component of autophagosomes and Cvt vesicles; regulator of Atg1p, targets it to autophagosomes; binds the Atg1p-Atg13p complex, triggering its vacuolar degradation; unique ubiquitin-like protein whose conjugation target is lipid phosphatidylethanolamine (PE); Atg8p-PE is anchored to membranes, is involved in phagophore expansion, and may mediate membrane fusion during autophagosome formation; dec…	1.11022e-16	1.21014e-14	6.27143e-12	0.429407	0.367701	0.473191	0.814181	3.6442	3.76752	0.317097	0.401384	0.468697	0.676571	1.62704	1.20209	-0.0447765	0.290257	0.531696	0.760673	0.919065	-0.411925	-0.346196	-0.248839	0.0431183	0.636534	0.245055	0.504696	0.73698	0.975651	0.759818	-0.393341	-0.350367	-0.245349	0.474294	0.843661	0.183137	0.466121	0.705732	0.947489	0.813853	-0.406464	-0.357237	-0.251651	0.384636	0.814371
856137	ATH1	YPR026W	S000006230	Acid trehalase required for utilization of extracellular trehalose; involved in intracellular trehalose degradation during growth recovery after saline stress	5.81013e-12	0.00201325	0.000444407	-0.0285482	0.219311	0.330264	-0.0424332	1.54527	0.390548	-0.0272148	0.210705	0.26734	-0.0317905	0.77092	0.152338	0.316475	0.566541	0.725723	0.811518	0.927988	-0.400148	-0.257037	-0.0528373	0.09851	0.864414	0.421792	0.625939	0.751972	0.986351	0.660938	-0.369965	-0.217119	-0.23877	0.586709	0.90146	0.392272	0.624179	0.769434	0.948326	0.802187	-0.397259	-0.242773	-0.167244	0.397361	0.919972
855736	ATO2	YNR002C	S000005285	Putative transmembrane protein involved in export of ammonia; ammonia is a starvation signal that promotes cell death in aging colonies; phosphorylated in mitochondria; member of the TC 9.B.33 YaaH family; homolog of Y. lipolytica Gpr1p; ATO2 has a paralog, ADY2, that arose from the whole genome duplication	5.91868e-10	5.59284e-10	9.53046e-08	0.320581	-0.0821959	0.44151	0.511044	2.35667	2.24551	0.217626	-0.063604	0.335805	0.364905	1.17386	0.932224	-0.0384367	0.0277605	0.373381	0.636591	0.931448	-0.0735513	-0.465829	-0.304287	-0.126217	0.487564	0.247882	0.538429	0.74083	0.982608	0.717935	-0.433183	-0.312863	-0.248984	0.524976	0.847497	0.204672	0.465913	0.70535	0.962662	0.792814	-0.384666	-0.356988	-0.271357	0.424869	0.818499
854778	BCY1	YIL033C	S000001295	Regulatory subunit of the cyclic AMP-dependent protein kinase (PKA); PKA is a component of a signaling pathway that controls a variety of cellular processes, including metabolism, cell cycle, stress response, stationary phase, and sporulation	2.32037e-14	8.03859e-08	0.00024938	0.125818	0.319609	0.633957	0.30938	1.79015	1.11963	0.0858731	0.261194	0.449864	0.184799	0.795848	0.356226	0.167799	0.462694	0.695854	0.775692	0.933656	-0.417468	-0.348319	-0.047595	0.0475246	0.785909	0.336155	0.605608	0.768095	0.961823	0.77792	-0.429885	-0.264467	-0.186114	0.438701	0.900638	0.275101	0.561486	0.756907	0.908523	0.860595	-0.435129	-0.305267	-0.133704	0.288606	0.87519
851238	BDH2	YAL061W	S000000057	Putative medium-chain alcohol dehydrogenase with similarity to BDH1; transcription induced by constitutively active PDR1 and PDR3	2.55331e-11	2.26241e-12	2.36188e-06	0.791408	0.426609	0.906553	0.714371	2.37311	2.45346	0.490024	0.441999	0.810936	0.577704	1.25707	1.04641	-0.357122	0.107912	0.459956	0.649515	0.741334	-0.493622	-0.480596	-0.204484	0.0802451	0.427573	0.0649908	0.45644	0.667322	0.941461	0.729095	-0.512365	-0.317951	-0.295558	0.46177	0.754513	-0.0472917	0.375933	0.631412	0.890964	0.754496	-0.522814	-0.371606	-0.279862	0.372494	0.68888
853482	BNA1	YJR025C	S000003786	3-hydroxyanthranilic acid dioxygenase; required for the de novo biosynthesis of NAD from tryptophan via kynurenine; expression regulated by Hst1p	1e-16	1e-16	1e-16	-0.734067	-0.0479274	0.653598	0.946987	4.65399	6.85563	-0.291362	-0.0212464	0.284525	0.314482	1.09923	1.03917	0.0438171	0.299067	0.613834	0.725106	0.937431	-0.334476	-0.445251	-0.0936498	-0.0202363	0.676537	0.348111	0.555117	0.74959	0.922691	0.861223	-0.354064	-0.303507	-0.161441	0.305899	0.891269	0.282063	0.504148	0.730565	0.892044	0.894427	-0.355639	-0.342454	-0.148201	0.23393	0.856005
856021	BRO1	YPL084W	S000006005	Cytoplasmic class E vacuolar protein sorting (VPS) factor; coordinates deubiquitination in the multivesicular body (MVB) pathway by recruiting Doa4p to endosomes	5.41481e-08	1.44897e-05	0.00487431	0.00398178	0.594923	0.629839	0.300782	1.50193	0.278106	0.00277009	0.440195	0.431769	0.182998	0.730543	0.120449	0.122818	0.484957	0.729446	0.761269	0.897976	-0.49061	-0.365227	0.0157165	0.064962	0.780306	0.480261	0.655561	0.787582	0.96525	0.502104	-0.348965	-0.227426	-0.164303	0.71885	0.892336	0.35404	0.634308	0.831939	0.956433	0.736463	-0.448304	-0.31382	-0.0936392	0.47334	0.92062
855411	BXI1	YNL305C	S000005249	Protein involved in apoptosis; variously described as containing a BCL-2 homology (BH3) domain or as a member of the BAX inhibitor family; reported to promote apoptosis under some conditions and to inhibit it in others; localizes to ER and vacuole; may link the unfolded protein response to apoptosis via regulation of calcium-mediated signaling; translocates to mitochondria under apoptosis-inducin…	4.44089e-16	3.4166e-12	1.02848e-08	0.470375	0.224282	0.520851	0.759422	3.07153	2.24712	0.316499	0.1721	0.379443	0.496783	1.14447	0.677801	0.212294	0.408169	0.629468	0.869969	0.926923	-0.304003	-0.328223	-0.255913	0.173511	0.785686	0.292727	0.546656	0.760838	0.991752	0.679193	-0.398744	-0.3293	-0.233707	0.575286	0.859482	0.274243	0.515755	0.736771	0.975644	0.770355	-0.37814	-0.336098	-0.245621	0.463748	0.85532
856772	CAJ1	YER048C	S000000850	Nuclear type II J heat shock protein of the E. coli dnaJ family; contains a leucine zipper-like motif, binds to non-native substrates for presentation to Ssa3p, may function during protein translocation, assembly and disassembly	8.51141e-07	1.2763e-05	0.00225889	-0.19861	0.29389	0.73764	0.210693	1.34425	0.71474	-0.0890953	0.151067	0.352057	0.089176	0.517012	0.256338	-0.235867	0.262626	0.664918	0.530453	0.677692	-0.568065	-0.559884	0.221107	-0.0067168	0.509993	0.400614	0.73112	0.823257	0.949692	0.572846	-0.524188	-0.179714	-0.0967603	0.62843	0.917399	0.176079	0.620489	0.858035	0.887698	0.689853	-0.608784	-0.366311	0.0283158	0.433007	0.856468
856093	CIP1	YPL014W	S000005935	Cyclin-dependent kinase inhibitor; interacts with and inhibits the Cdc28p/Cln2p, G1/S phase cyclin-dependent kinase complex but not S-phase, or M-phase complexes; overexpression blocks cells in G1 phase and stabilizes the Cdc28p inhibitor Sic1p, while disruption accelerates the G1/S phase transition; phosphorylated during S phase in a Cdc28p-dependent manner; green fluorescent protein (GFP)-fusio…	7.07233e-11	3.12809e-05	0.00105332	0.233666	0.286048	0.227437	-0.164089	1.19071	1.22636	0.234837	0.269544	0.268382	-0.150477	0.845984	0.55474	0.255914	0.353017	0.667906	0.666008	0.940037	-0.190621	-0.449554	0.0536491	-0.0975961	0.737798	0.271707	0.380962	0.642106	0.920748	0.871958	-0.210176	-0.379594	-0.303188	0.292706	0.796864	0.273802	0.381804	0.669855	0.855171	0.921574	-0.209146	-0.415757	-0.183011	0.160141	0.798403
855732	CIT1	YNR001C	S000005284	Citrate synthase; catalyzes the condensation of acetyl coenzyme A and oxaloacetate to form citrate; the rate-limiting enzyme of the TCA cycle; nuclear encoded mitochondrial protein; CIT1 has a paralog, CIT2, that arose from the whole genome duplication	1.11022e-16	1.50016e-06	7.51713e-05	0.260263	0.0731094	0.356065	-0.00877279	1.75363	1.17954	0.218449	0.0564321	0.294582	-0.00547219	0.711472	0.332583	0.365241	0.495108	0.745536	0.8313	0.915074	-0.261027	-0.373974	-0.0512794	0.136447	0.863781	0.349092	0.539491	0.752239	0.967667	0.792264	-0.333317	-0.326826	-0.214778	0.431749	0.885313	0.360613	0.528835	0.760031	0.925256	0.853777	-0.308316	-0.350759	-0.150678	0.316589	0.888883
853007	CLD1	YGR110W	S000003342	Mitochondrial cardiolipin-specific phospholipase; functions upstream of Taz1p to generate monolyso-cardiolipin; transcription increases upon genotoxic stress; involved in restricting Ty1 transposition; has homology to mammalian CGI-58	4.82644e-05	1.77631e-08	0.00155727	0.233803	0.673517	0.575776	0.255925	1.72702	1.23094	0.18165	0.455666	0.408453	0.181824	1.00452	0.639401	0.305803	0.334274	0.50952	0.439359	0.931334	-0.117024	-0.260766	0.127843	-0.375585	0.632681	0.505693	0.492083	0.637108	0.964117	0.607826	-0.116749	-0.232329	-0.364751	0.611696	0.831465	0.51452	0.509782	0.679069	0.945289	0.758366	-0.130309	-0.266237	-0.28464	0.43734	0.878216
853644	CNB1	YKL190W	S000001673	Calcineurin B; regulatory subunit of calcineurin, a Ca++/calmodulin-regulated type 2B protein phosphatase which regulates Crz1p (stress-response transcription factor); other calcineurin subunit encoded by CNA1 and/or CMP1; regulates function of Aly1p alpha-arrestin; myristoylation by Nmt1p reduces calcineurin activity in response to submaximal Ca signals, is needed to prevent constitutive phospha…	1.0039e-11	4.96624e-08	0.00018717	0.168698	0.172711	0.543967	0.515176	1.81575	1.20884	0.0776136	0.0849826	0.25724	0.199687	0.603892	0.357883	0.236627	0.515844	0.835045	0.784708	0.845047	-0.41587	-0.467834	0.127746	0.147538	0.839503	0.376942	0.667519	0.87355	0.953396	0.646397	-0.46741	-0.327639	-0.0339707	0.559565	0.926475	0.338143	0.632596	0.883683	0.920249	0.733167	-0.462035	-0.385407	0.0215517	0.430866	0.921121
853383	COA3	YJL062W-A	S000007611	Mitochondrial protein required for cytochrome c oxidase assembly; also involved in translational regulation of Cox1p and prevention of Cox1p aggregation before assembly; located in the mitochondrial inner membrane	7.17234e-09	9.70374e-05	0.00629318	-0.0574792	0.213766	0.493367	0.650264	1.27801	0.0878445	-0.0302013	0.115672	0.291536	0.343986	0.519404	0.0323843	0.0173064	0.168234	0.526409	0.808861	0.895084	-0.195494	-0.49345	-0.316886	0.128054	0.62292	0.37702	0.563391	0.823281	0.97268	0.517934	-0.33562	-0.391907	-0.125806	0.712419	0.860323	0.226649	0.409972	0.739566	0.967364	0.747611	-0.291928	-0.473654	-0.231397	0.476018	0.809304
850915	COA4	YLR218C	S000004208	Twin Cx(9)C protein involved in cytochrome c oxidase organization; organization includes assembly or stability; localizes to the mitochondrial intermembrane space via the Mia40p-Erv1p system; interacts genetically with CYC1 and with cytochrome c oxidase assembly factors	2.10942e-14	3.63716e-05	0.000684266	0.113027	0.115302	0.186822	0.550808	1.70299	0.380652	0.327258	0.299065	0.340987	0.688259	1.2283	0.167367	0.347354	0.527224	0.662009	0.799378	0.953873	-0.319537	-0.221287	-0.122964	0.0572693	0.843944	0.428162	0.658892	0.844673	0.959735	0.704844	-0.405279	-0.299808	-0.080732	0.509135	0.941321	0.404633	0.619355	0.787672	0.916455	0.840058	-0.378795	-0.273345	-0.102461	0.319175	0.926144
853626	COS5	YJR161C	S000003922	Endosomal protein involved in turnover of plasma membrane proteins; member of the DUP380 subfamily of conserved, often subtelomeric COS genes; required for the multivesicular vesicle body sorting pathway that internalizes plasma membrane proteins for degradation; Cos proteins provide ubiquitin in trans for nonubiquitinated cargo proteins	2.81579e-08	6.96352e-07	0.00400058	0.054751	0.50353	0.555807	0.574247	1.54851	0.646091	0.0371905	0.341912	0.412284	0.336729	0.803359	0.273813	0.0727228	0.285079	0.635274	0.661526	0.928153	-0.287876	-0.491711	0.0155383	-0.0913812	0.665686	0.463094	0.602805	0.869543	0.953943	0.641936	-0.299401	-0.404119	-0.0400382	0.564716	0.925417	0.326407	0.5087	0.83242	0.89763	0.816648	-0.317053	-0.473349	-0.0186131	0.318773	0.881326
851348	COS7	YDL248W	S000002407	Endosomal protein involved in turnover of plasma membrane proteins; member of the DUP380 subfamily of conserved, often subtelomeric COS genes; required for the multivesicular vesicle body sorting pathway that internalizes plasma membrane proteins for degradation; Cos proteins provide ubiquitin in trans for nonubiquitinated cargo proteins; the authentic, non-tagged protein is detected in highly pu…	3.38351e-09	3.95629e-07	0.00881073	0.0779066	0.60181	0.660405	0.638606	1.46997	0.393316	0.0487094	0.3874	0.485962	0.36789	0.693889	0.15948	0.0283866	0.254388	0.649658	0.75817	0.893818	-0.293391	-0.54983	-0.0874103	0.0651994	0.670934	0.421041	0.5491	0.851191	0.961806	0.575941	-0.273521	-0.44743	-0.0746063	0.640658	0.883812	0.258318	0.442848	0.810947	0.928074	0.770145	-0.301845	-0.527836	-0.0859316	0.403785	0.84026
856884	COX15	YER141W	S000000943	Protein required for the hydroxylation of heme O to form heme A; heme A is an essential prosthetic group for cytochrome c oxidase	8.98281e-13	0.00993874	0.000517654	-0.518918	0.379417	0.543683	0.0904088	1.20944	-0.120641	-0.357396	0.255089	0.366634	0.0521393	0.502327	-0.0404412	0.155311	0.416126	0.701879	0.828396	0.914726	-0.371052	-0.415307	-0.106177	0.133121	0.782511	0.52301	0.636134	0.780044	0.970664	0.64569	-0.281643	-0.241885	-0.181265	0.582113	0.926923	0.365368	0.558191	0.780431	0.948608	0.813151	-0.340694	-0.340996	-0.152847	0.386754	0.901577
854695	COX5B	YIL111W	S000001373	Subunit Vb of cytochrome c oxidase; cytochrome c oxidase is the terminal member of the mitochondrial inner membrane electron transport chain; Cox5Bp is predominantly expressed during anaerobic growth while its isoform Va (Cox5Ap) is expressed during aerobic growth; COX5B has a paralog, COX5A, that arose from the whole genome duplication	2.9976e-15	0.00327084	4.51817e-06	-0.112852	0.221953	0.295548	0.370681	1.77239	-0.712111	-0.0482845	0.156843	0.204565	0.232149	0.793557	-0.202775	-0.196734	0.112045	0.355928	0.59119	0.913032	-0.338461	-0.3358	-0.270275	-0.16523	0.454625	-0.059553	0.322732	0.625509	0.911441	0.696683	-0.46778	-0.430981	-0.313683	0.456209	0.662827	-0.143537	0.215784	0.499975	0.77127	0.861205	-0.416485	-0.397839	-0.3048	0.114382	0.575439
852324	CSG2	YBR036C	S000000240	Endoplasmic reticulum membrane protein; required for mannosylation of inositolphosphorylceramide and for growth at high calcium concentrations; protein abundance increases in response to DNA replication stress	1.66867e-13	4.53315e-12	6.99917e-08	-0.102042	0.522339	1.13034	0.992326	2.94837	1.85165	-0.0332294	0.190122	0.383283	0.309133	0.7327	0.420409	-0.112672	0.279341	0.607212	0.749518	0.854892	-0.466013	-0.461319	-0.133413	0.0931818	0.623731	0.400017	0.672545	0.814178	0.973825	0.602478	-0.450693	-0.241625	-0.139468	0.629324	0.911571	0.255369	0.585449	0.79833	0.962609	0.725802	-0.485172	-0.330532	-0.146542	0.491813	0.875141
850974	DCS1	YLR270W	S000004260	Non-essential hydrolase involved in mRNA decapping; activates Xrn1p; may function in a feedback mechanism to regulate deadenylation, contains pyrophosphatase activity and a HIT (histidine triad) motif; acts as inhibitor of neutral trehalase Nth1p; required for growth on glycerol medium; protein abundance increases in response to DNA replication stress; DCS1 has a paralog, DCS2, that arose from th…	1e-16	8.10463e-15	4.96825e-13	0.330017	0.219197	0.53077	0.810952	4.75458	3.14032	0.613926	0.333961	0.519597	0.554135	1.56834	0.636163	0.382945	0.560065	0.695925	0.811122	0.938332	-0.325487	-0.225249	-0.0923161	0.0876658	0.870556	0.39817	0.617196	0.792445	0.974093	0.733764	-0.382528	-0.282478	-0.168964	0.498377	0.91825	0.401405	0.610048	0.774865	0.936405	0.824103	-0.370252	-0.267933	-0.144879	0.360365	0.921147
854805	DOT5	YIL010W	S000001272	Nuclear thiol peroxidase; functions as an alkyl-hydroperoxide reductase during post-diauxic growth	1e-16	2.22045e-16	6.32827e-15	0.0650244	0.153266	0.759125	1.04007	5.47857	3.63389	0.043968	0.090278	0.399049	0.447949	1.38953	0.714566	0.379488	0.520448	0.696045	0.817467	0.939913	-0.278833	-0.275522	-0.100181	0.0941107	0.860998	0.426838	0.631701	0.803545	0.982396	0.65486	-0.372208	-0.279023	-0.164575	0.587784	0.916833	0.425698	0.617678	0.795899	0.963011	0.760277	-0.35561	-0.286503	-0.150313	0.457846	0.928128
852173	ECM21 (ART2)	YBL101C	S000000197	Protein involved in regulating endocytosis of plasma membrane proteins; identified as a substrate for ubiquitination by Rsp5p and deubiquitination by Ubp2p; promoter contains several Gcn4p binding elements; ECM21 has a paralog, CSR2, that arose from the whole genome duplication also called ART2	4.25904e-12	4.92424e-08	1.70971e-05	0.25041	0.52404	0.560047	0.265977	2.50823	0.864706	0.210406	0.533282	0.477607	0.19378	1.10183	0.339981	0.210507	0.553191	0.760813	0.84038	0.882588	-0.48923	-0.321001	-0.0422674	0.180417	0.845938	0.335931	0.575345	0.753256	0.984402	0.514526	-0.391829	-0.282839	-0.234582	0.730655	0.836647	0.305647	0.596888	0.795392	0.980827	0.681586	-0.449363	-0.31212	-0.173528	0.559072	0.883789
851006	ECM38	YLR299W	S000004290	Gamma-glutamyltranspeptidase; major glutathione-degrading enzyme; involved in detoxification of electrophilic xenobiotics; expression induced mainly by nitrogen starvation	7.83595e-13	0.261154	5.82787e-05	-0.478075	0.319431	0.188722	-0.112019	1.47986	-0.617715	-0.314706	0.237578	0.115676	-0.0531267	0.561968	-0.203548	0.220713	0.598492	0.792973	0.76452	0.865962	-0.536326	-0.306846	0.0968352	0.101087	0.845517	0.482501	0.71189	0.866173	0.933423	0.474858	-0.417976	-0.261615	-0.0186047	0.70584	0.916652	0.381001	0.703671	0.889774	0.91216	0.711495	-0.509081	-0.303675	0.039956	0.442306	0.944913
852128	EMI2	YDR516C	S000002924	Non-essential protein of unknown function; required for transcriptional induction of the early meiotic-specific transcription factor IME1; required for sporulation; expression regulated by glucose-repression transcription factors Mig1/2p; EMI2 has a paralog, GLK1, that arose from the whole genome duplication; protein abundance increases in response to DNA replication stress	1e-16	2.89654e-10	7.23987e-09	0.0826179	0.0233834	0.275069	0.560399	2.8646	2.04386	0.885908	0.12166	0.754778	0.807786	1.77148	0.654688	0.358309	0.516089	0.668101	0.79732	0.953942	-0.294498	-0.243544	-0.112188	0.0545978	0.844492	0.39737	0.609647	0.791146	0.96061	0.775315	-0.373779	-0.290285	-0.153652	0.439772	0.920957	0.390474	0.586619	0.760658	0.91845	0.856189	-0.351547	-0.278509	-0.141228	0.305569	0.910181
854007	ENB1	YOL158C	S000005518	Endosomal ferric enterobactin transporter; expressed under conditions of iron deprivation; member of the major facilitator superfamily; expression is regulated by Rcs1p and affected by chloroquine treatment	2.66454e-15	0.0811397	3.62919e-09	0.40473	0.780401	0.270439	0.0768232	1.47951	-2.02802	0.210518	0.73799	0.215306	0.0553267	0.565625	-0.682648	0.0214847	0.397476	0.608885	0.820618	0.89424	-0.481287	-0.314134	-0.221104	0.143769	0.714317	-0.0820262	0.252772	0.537152	0.852901	0.255811	-0.401761	-0.40093	-0.35818	0.823033	0.50038	-0.0232717	0.374232	0.641439	0.923117	0.699715	-0.496642	-0.38721	-0.307081	0.467946	0.693509
855154	EPO1	YMR124W	S000004731	Protein involved in septin-ER tethering; interacts with ER membrane protein, Scs2p, and Shs1p, a septin ring component, at bud neck to create ER diffusion barrier; GFP-fusion protein localizes to the cell periphery, cytoplasm, bud, and bud neck; interacts with Crm1p in two-hybrid assay; YMR124W has a paralog, YLR031W, that arose from the whole genome duplication	6.30389e-08	0.00282291	0.00924532	-0.0195213	0.39366	0.57516	-0.336126	1.01777	0.0135919	-0.00870886	0.248825	0.356803	-0.209037	0.472372	0.00580716	-0.523074	-0.0301695	0.359991	0.488121	0.633507	-0.484912	-0.521141	-0.13445	-0.0160779	0.2559	-0.256243	0.0867935	0.266754	0.791351	0.390402	-0.366029	-0.248102	-0.6431	0.610587	0.349764	-0.427815	0.0325274	0.345344	0.710227	0.563225	-0.46896	-0.422183	-0.435046	0.335149	0.335675
854812	EPS1	YIL005W	S000001267	ER protein with chaperone and co-chaperone activity; involved in retention of resident ER proteins; has a role in recognizing proteins targeted for ER-associated degradation (ERAD), member of the protein disulfide isomerase family	6.03662e-07	0.355018	0.00358323	-0.469585	0.606769	0.527213	-0.0596117	0.465455	-0.536412	-0.1915	0.311782	0.247151	-0.0252128	0.175818	-0.189275	-0.264078	0.315693	0.62443	0.649118	0.693887	-0.663402	-0.438437	0.0166833	0.12719	0.54292	0.274151	0.636062	0.762404	0.945675	0.439409	-0.530411	-0.218311	-0.173322	0.756786	0.815522	-0.0838816	0.46642	0.734245	0.821448	0.660996	-0.673861	-0.395114	-0.0539655	0.378063	0.696387
854495	FAA1	YOR317W	S000005844	Long chain fatty acyl-CoA synthetase; activates fatty acids with a preference for C12:0-C16:0 chain lengths; role in the competitive import of long-chain fatty acids and sphingoid long-chain bases; accounts for most acyl-CoA synthetase activity; localizes to lipid particles and the plasma membrane; role in sphingolipid-to-glycerolipid metabolism; forms ER foci upon replication stress; faa1 faa4 d…	2.04942e-06	0.000108928	0.00296574	-0.114977	0.774649	0.869393	0.464228	0.94328	-0.285533	-0.0539942	0.527615	0.537282	0.269009	0.530457	-0.125399	-0.497536	-0.00469765	0.269643	0.384518	0.713176	-0.491594	-0.367707	-0.124616	-0.226795	0.23084	-0.281858	0.35586	0.465838	0.743018	0.551693	-0.731989	-0.174857	-0.314865	0.38816	0.498585	-0.464232	0.0920761	0.335828	0.500079	0.705169	-0.5807	-0.334093	-0.181995	-0.0726131	0.314348
853286	FBP26	YJL155C	S000003691	Fructose-2,6-bisphosphatase, required for glucose metabolism; protein abundance increases in response to DNA replication stress	1.29075e-12	0.000942826	2.37666e-06	-0.460462	-0.284339	0.280167	-0.0729625	1.96645	0.498349	-0.188837	-0.166684	0.14117	-0.034438	0.651932	0.151474	-0.27642	0.190412	0.503473	0.676432	0.794295	-0.517275	-0.434625	-0.180147	0.0613315	0.499683	0.151682	0.544562	0.711419	0.959976	0.52603	-0.53714	-0.265646	-0.259815	0.688254	0.771463	-0.0047121	0.445912	0.682213	0.919414	0.669572	-0.568752	-0.351245	-0.247692	0.493405	0.721682
853923	FMP46	YKR049C	S000001757	Putative redox protein containing a thioredoxin fold; the authentic, non-tagged protein is detected in highly purified mitochondria in high-throughput studies	1.23262e-09	3.14162e-09	6.37356e-07	-0.0468176	0.455579	0.27387	0.40651	2.09156	1.99717	-0.0397516	0.423362	0.263966	0.390383	1.31671	0.979006	-0.313589	0.00636922	0.21117	0.514127	0.86195	-0.321646	-0.275258	-0.367011	-0.211625	0.325157	0.3248	0.472275	0.700122	0.985487	0.749656	-0.272586	-0.341926	-0.307241	0.496898	0.841821	0.200708	0.398893	0.638047	0.94833	0.830415	-0.303857	-0.351465	-0.343523	0.369137	0.783679
855034	FMS1	YMR020W	S000004622	Polyamine oxidase; converts spermine to spermidine, which is required for the essential hypusination modification of translation factor eIF-5A; also involved in pantothenic acid biosynthesis	5.94503e-09	3.00234e-08	5.82015e-06	0.110996	0.43651	0.530847	0.482431	2.40122	1.01456	0.0604419	0.221634	0.262625	0.229422	0.858112	0.369655	0.378721	0.558712	0.738283	0.844368	0.916171	-0.328001	-0.28379	-0.0775395	0.151879	0.886003	0.469171	0.604985	0.746497	0.943711	0.388312	-0.296082	-0.236278	-0.192181	0.805399	0.833151	0.474501	0.630254	0.790456	0.976027	0.550303	-0.322714	-0.263293	-0.174078	0.684284	0.898428
850736	FRE8	YLR047C	S000004037	Protein with sequence similarity to iron/copper reductases; involved in iron homeostasis; deletion mutant has iron deficiency/accumulation growth defects; expression increased in the absence of copper-responsive transcription factor Mac1p	1.87495e-05	6.77324e-05	0.00604756	0.0454856	0.942374	0.584153	0.196413	1.13299	-0.107098	0.0417529	0.749229	0.471304	0.155917	0.712086	-0.0577972	0.23072	0.496209	0.667659	0.753645	0.95604	-0.39694	-0.268099	-0.0575355	-0.00274543	0.799435	0.666155	0.459654	0.546334	0.844242	0.386082	0.0847339	-0.151563	-0.334907	0.681809	0.749477	0.523223	0.560332	0.712053	0.935873	0.789553	-0.185548	-0.246549	-0.228477	0.394243	0.907931
851225	FUN14	YAL008W	S000000006	Integral mitochondrial outer membrane (MOM) protein; dosage suppressor of an MDM10 null that reduces ERMES-related phenotypes, such as alterations in mitochondrial morphology, protein complex assembly, and lipid profile; dosage suppressor of MDM12, MDM34, and MMM1 null mutant growth defects; novel mechanism of MOM import involving Tom70p, the TOM complex, and the TIM23 complex, requiring mitochon…	8.88178e-16	4.38268e-10	8.41142e-09	-0.0615755	-0.0081168	0.297121	0.76403	2.76382	1.96955	-0.0278296	-0.00562792	0.223018	0.47278	1.13687	0.561294	-0.34226	-0.0594765	0.26562	0.541296	0.833812	-0.267027	-0.431599	-0.328325	-0.149121	0.318026	0.110069	0.424855	0.719553	0.948978	0.752561	-0.427335	-0.427978	-0.234992	0.447813	0.778119	-0.0528733	0.269651	0.594258	0.855449	0.8303	-0.393957	-0.456196	-0.284786	0.251767	0.654186
855291	GAD1	YMR250W	S000004862	Glutamate decarboxylase; converts glutamate into gamma-aminobutyric acid (GABA) during glutamate catabolism; involved in response to oxidative stress	1e-16	1e-16	3.33067e-16	0.394792	0.159387	0.536236	0.618984	4.6054	5.40194	0.380886	0.197482	0.512734	0.545562	2.19143	1.16189	0.180562	0.352521	0.481324	0.641035	0.997478	-0.265346	-0.199856	-0.165088	-0.186626	0.672234	0.290803	0.511471	0.689203	0.930923	0.866461	-0.356163	-0.277697	-0.252872	0.311073	0.852452	0.267558	0.480314	0.648974	0.874052	0.925103	-0.339997	-0.263135	-0.234907	0.180495	0.824101
856910	GCG1	YER163C	S000000965	Gamma-glutamyl cyclotransferase; cleaves the gamma-glutamyl bond of glutathione to yield 5-oxoproline and a Cys-Gly dipeptide; similar to mammalian pro-apoptotic protein ChaC1; expression of mouse ChaC1 in yeast increases apoptosis; green fluorescent protein (GFP)-fusion protein localizes to the cytoplasm and nucleus; periodically expressed during the metabolic cycle	1.8302e-10	0.000385867	0.000128224	-0.299976	-0.18151	0.268524	0.35693	1.47607	0.600139	-0.125337	-0.086089	0.128982	0.15908	0.513621	0.184924	-0.167611	0.0701861	0.43298	0.712852	0.871888	-0.256391	-0.492124	-0.320791	0.0298066	0.496588	0.257589	0.555993	0.781816	0.985011	0.639134	-0.445692	-0.345635	-0.197035	0.606818	0.849931	0.106242	0.401093	0.696935	0.944615	0.775704	-0.401106	-0.42769	-0.259817	0.41915	0.767949
856705	GLC3	YEL011W	S000000737	Glycogen branching enzyme, involved in glycogen accumulation; green fluorescent protein (GFP)-fusion protein localizes to the cytoplasm in a punctate pattern; relocalizes from nucleus to cytoplasmic foci upon DNA replication stress; glycogen accumulation defect of the null mutant is functionally complemented by human GBE1, which is associated with glycogen storage disease	9.70224e-13	7.45757e-08	3.73335e-06	0.118843	0.129398	0.245621	0.271343	2.00237	1.86987	0.151372	0.12147	0.193166	0.220657	1.13813	0.725109	0.54399	0.60214	0.582743	0.680962	0.920065	-0.217663	-0.0201794	-0.0795235	-0.0587092	0.844262	0.468623	0.62597	0.736353	0.949216	0.7893	-0.323174	-0.196124	-0.212753	0.411373	0.924876	0.505114	0.635971	0.70904	0.89215	0.851953	-0.299332	-0.14683	-0.177214	0.276537	0.925523
855359	GLC8	YMR311C	S000004928	Regulatory subunit of protein phosphatase 1 (Glc7p); involved in glycogen metabolism and chromosome segregation; proposed to regulate Glc7p activity via conformational alteration; ortholog of the mammalian protein phosphatase inhibitor 2; protein abundance increases in response to DNA replication stress	1.14264e-12	1.80656e-06	6.6113e-05	-0.0456891	0.0690831	0.642696	0.219002	1.83832	0.844962	-0.0273155	0.0416745	0.391348	0.101309	0.6878	0.275292	0.266026	0.464305	0.831095	0.773691	0.842905	-0.321278	-0.527726	0.13638	0.135745	0.827028	0.431149	0.669712	0.853605	0.965874	0.61428	-0.415977	-0.298105	-0.0765128	0.607464	0.929506	0.384726	0.617642	0.881116	0.931601	0.730125	-0.396536	-0.400879	0.0037489	0.448268	0.928877
850317	GLK1	YCL040W	S000000545	Glucokinase; catalyzes the phosphorylation of glucose at C6 in the first irreversible step of glucose metabolism; one of three glucose phosphorylating enzymes; expression regulated by non-fermentable carbon sources; GLK1 has a paralog, EMI2, that arose from the whole genome duplication	1e-16	4.56168e-12	1.08389e-11	0.0112711	-0.00237646	0.197036	0.462841	2.99291	3.53547	0.0193984	-0.00515478	0.393703	0.76093	2.23087	1.16722	0.135919	0.289087	0.459912	0.669418	0.995343	-0.22975	-0.251367	-0.229718	-0.148588	0.646082	0.30024	0.504611	0.702494	0.935085	0.861384	-0.338048	-0.304207	-0.240305	0.321415	0.85655	0.261772	0.45681	0.651912	0.883658	0.919225	-0.316051	-0.296808	-0.243116	0.198524	0.818579
851865	GLO2	YDR272W	S000002680	Cytoplasmic glyoxalase II; catalyzes the hydrolysis of S-D-lactoylglutathione into glutathione and D-lactate; GLO2 has a paralog, GLO4, that arose from the whole genome duplication	2.66454e-15	4.89955e-05	3.40099e-06	-0.327515	-0.152792	0.36869	-0.0135019	1.89262	0.95169	-0.0790001	-0.0470534	0.110442	-0.00381191	0.421199	0.179401	-0.291033	0.0940372	0.442291	0.651052	0.818001	-0.409982	-0.474447	-0.230127	0.00552116	0.450148	0.0695323	0.433129	0.66564	0.952083	0.714318	-0.478337	-0.34518	-0.31125	0.489983	0.748284	-0.077998	0.310186	0.601005	0.867328	0.788295	-0.470356	-0.413975	-0.29076	0.308798	0.655981
855447	GOR1	YNL274C	S000005218	Glyoxylate reductase; null mutation results in increased biomass after diauxic shift; the authentic, non-tagged protein is detected in highly purified mitochondria in high-throughput studies; protein abundance increases in response to DNA replication stress	4.44089e-16	0.0945304	0.00120591	0.153385	-0.311884	-0.234462	-0.0483925	1.08182	0.562452	0.128523	-0.226832	-0.201646	-0.0275943	0.471841	0.159061	0.413608	0.488164	0.721007	0.789038	0.926793	-0.203876	-0.349849	-0.0307296	0.0712697	0.85613	0.333421	0.518935	0.794971	0.92569	0.830274	-0.322985	-0.410159	-0.10435	0.340641	0.885437	0.372564	0.511432	0.771679	0.876345	0.882375	-0.274351	-0.3884	-0.0731825	0.226124	0.882837
856741	GPA2	YER020W	S000000822	Nucleotide binding alpha subunit of the heterotrimeric G protein; interacts with the receptor Gpr1p, has signaling role in response to nutrients; required for the recruitment of Ras-GTP at the plasma membrane and in the nucleus	5.01242e-09	8.70944e-05	0.00502429	0.0304022	0.256689	0.404651	0.199301	1.47915	0.408957	0.0214157	0.179715	0.305754	0.12197	0.734548	0.171338	0.186183	0.36562	0.701976	0.727282	0.926674	-0.276294	-0.479322	0.0218527	-0.0067275	0.750032	0.403062	0.57294	0.814357	0.984208	0.604953	-0.321657	-0.367856	-0.152361	0.639983	0.8882	0.335951	0.521575	0.820847	0.939238	0.78648	-0.323795	-0.441535	-0.0867711	0.401572	0.888477
853052	GPC1	YGR149W	S000003381	Glycerophosphocholine acyltransferase (GPCAT); involved in in phosphatidylcholine (PC) synthesis; uses acetyl-CoA to acylate glycero-3-phosphocholine to yield lyso-PC; also catalyzes acylation of glycerophosphoethanolamine with acyl-CoA; predicted to be an integal membrane protein	1e-16	7.14984e-14	9.77074e-12	0.163499	0.430908	0.748587	0.77153	4.39492	2.1375	0.128316	0.311993	0.543376	0.469752	1.3744	0.533668	0.282249	0.437566	0.659536	0.843456	0.942524	-0.271233	-0.331378	-0.182036	0.124373	0.813955	0.394756	0.577575	0.769577	0.993116	0.603932	-0.335825	-0.301915	-0.223707	0.652271	0.876793	0.372039	0.552788	0.762832	0.981782	0.744611	-0.327189	-0.324219	-0.21842	0.497256	0.890589
851541	GPM2	YDL021W	S000002179	Homolog of Gpm1p phosphoglycerate mutase; converts 3-phosphoglycerate to 2-phosphoglycerate in glycolysis; may be non-functional; GPM2 has a paralog, GPM3, that arose from the whole genome duplication	1e-16	3.83581e-09	3.64683e-08	0.286684	0.0754212	0.14514	0.179896	2.08419	2.72152	0.792595	0.118502	0.21522	0.228539	1.31779	0.901887	0.460282	0.529983	0.64822	0.786145	0.94122	-0.2101	-0.199296	-0.124726	0.0531839	0.858898	0.364415	0.523781	0.699895	0.926889	0.869151	-0.298121	-0.276471	-0.233425	0.303281	0.874517	0.398605	0.530689	0.68988	0.890419	0.900441	-0.272669	-0.254297	-0.200729	0.22586	0.877714
853842	GPX1	YKL026C	S000001509	Phospholipid hydroperoxide glutathione peroxidase; induced by glucose starvation that protects cells from phospholipid hydroperoxides and nonphospholipid peroxides during oxidative stress; GPX1 has a paralog, HYR1, that arose from the whole genome duplication	1.08302e-08	4.84733e-05	0.000665853	0.101578	0.0581539	0.601977	0.0388318	1.53707	0.807112	0.0863011	0.0553333	0.596008	0.0326652	0.955844	0.396466	0.0549282	0.222348	0.625573	0.666475	0.910894	-0.226322	-0.558045	-0.00373612	-0.0678631	0.639247	0.285301	0.548116	0.716214	0.992265	0.683621	-0.408017	-0.267584	-0.294225	0.571505	0.846308	0.217789	0.463744	0.735976	0.941951	0.824249	-0.368807	-0.40082	-0.204069	0.367236	0.830872
856504	GRE3	YHR104W	S000001146	Aldose reductase; involved in methylglyoxal, d-xylose, arabinose, and galactose metabolism; stress induced (osmotic, ionic, oxidative, heat shock, starvation and heavy metals); regulated by the HOG pathway; protein abundance increases in response to DNA replication stress	1e-16	6.4615e-14	7.69051e-13	0.249796	0.100928	0.407417	0.506324	4.34762	3.04214	0.443518	0.1876	0.530173	0.456148	1.80605	0.870903	0.357789	0.554478	0.717208	0.814585	0.933762	-0.343577	-0.260869	-0.0681426	0.0966162	0.869714	0.366496	0.59616	0.783641	0.988188	0.681653	-0.387593	-0.297275	-0.198606	0.568318	0.895473	0.373995	0.600012	0.785173	0.962874	0.776979	-0.384967	-0.294458	-0.16453	0.440972	0.912436
850322	GRX1	YCL035C	S000000540	Glutathione-dependent disulfide oxidoreductase; hydroperoxide and superoxide-radical responsive, heat-stable, with active site cysteine pair; protects cells from oxidative damage; GRX1 has a paralog, GRX2, that arose from the whole genome duplication; protein abundance increases in response to DNA replication stress	1e-16	8.78186e-13	3.63199e-11	0.188255	0.228051	0.503699	0.488606	3.81648	2.51509	0.142188	0.150496	0.322081	0.247695	1.32247	0.665383	0.401232	0.524504	0.714338	0.736062	0.939389	-0.262218	-0.294934	0.0273318	-0.00833624	0.849633	0.419188	0.609482	0.800299	0.983928	0.673247	-0.351752	-0.302774	-0.170867	0.571334	0.912515	0.431238	0.60886	0.807378	0.948816	0.783502	-0.338915	-0.313058	-0.116956	0.416666	0.931414
854357	GSP2	YOR185C	S000005711	GTP binding protein (mammalian Ranp homolog); involved in the maintenance of nuclear organization, RNA processing and transport; interacts with Kap121p, Kap123p and Pdr6p (karyophilin betas); not required for viability; protein abundance increases in response to DNA replication stress; GSP2 has a paralog, GSP1, that arose from the whole genome duplication	1e-16	4.36381e-10	1.34735e-08	0.443832	0.228143	-0.0631137	0.357108	2.75065	2.01876	0.360313	0.224067	-0.0592177	0.314025	1.37836	0.548239	0.186918	0.36441	0.481328	0.690253	0.994662	-0.274028	-0.184823	-0.22734	-0.121553	0.689875	0.232809	0.449456	0.68845	0.949439	0.83386	-0.335713	-0.355131	-0.277303	0.367097	0.820455	0.222601	0.431089	0.631308	0.880621	0.920037	-0.322688	-0.3017	-0.266918	0.19387	0.796239
850569	GSY1	YFR015C	S000001911	Glycogen synthase; expression induced by glucose limitation, nitrogen starvation, environmental stress, and entry into stationary phase; GSY1 has a paralog, GSY2, that arose from the whole genome duplication; relocalizes from nucleus to cytoplasmic foci upon DNA replication stress	1e-16	4.14997e-08	5.14816e-06	0.0730977	-0.0190011	0.525272	0.535031	2.15708	0.990679	0.376675	-0.0626841	1.03727	0.855087	1.79197	0.316587	0.30003	0.420135	0.555343	0.714307	0.98912	-0.231404	-0.213638	-0.158463	-0.0855855	0.757039	0.404091	0.61585	0.74185	0.921684	0.848143	-0.374904	-0.216301	-0.170553	0.317706	0.914851	0.366565	0.541996	0.674992	0.849545	0.930688	-0.319013	-0.22002	-0.169001	0.14391	0.864803
854856	GTT1	YIR038C	S000001477	ER associated glutathione S-transferase; capable of homodimerization; glutathione transferase for Yvc1p vacuolar cation channel; expression induced during the diauxic shift and throughout stationary phase; functional overlap with Gtt2p, Grx1p, and Grx2p	1e-16	1e-16	1e-16	0.122805	-0.311285	0.519199	1.26362	7.53858	4.67387	0.0661057	-0.291048	0.474063	0.707584	2.01081	0.776366	0.0420483	0.252094	0.514604	0.705427	0.968021	-0.276828	-0.371538	-0.201889	-0.0757186	0.635377	0.263128	0.535884	0.775727	0.984828	0.690508	-0.414718	-0.362901	-0.204973	0.555212	0.854967	0.205911	0.472674	0.732171	0.946222	0.815079	-0.39198	-0.384419	-0.214577	0.381809	0.828809
854651	GUT2	YIL155C	S000001417	Mitochondrial glycerol-3-phosphate dehydrogenase; expression is repressed by both glucose and cAMP and derepressed by non-fermentable carbon sources in a Snf1p, Rsf1p, Hap2/3/4/5 complex dependent manner	1.1609e-10	3.18907e-09	0.000285457	0.236427	0.352219	0.838512	0.717184	2.08552	1.07039	0.187522	0.311433	0.639638	0.496891	1.07472	0.441078	0.154271	0.408928	0.629664	0.761826	0.960746	-0.362987	-0.327525	-0.118859	0.00289653	0.750822	0.404503	0.688254	0.803671	0.970079	0.636293	-0.466077	-0.207658	-0.148825	0.590771	0.920154	0.331652	0.620264	0.78243	0.945122	0.796122	-0.452926	-0.265162	-0.145754	0.399373	0.90726
856113	HAL1	YPR005C	S000006209	Cytoplasmic protein involved in halotolerance; decreases intracellular Na+ (via Ena1p) and increases intracellular K+ by decreasing efflux; expression repressed by Ssn6p-Tup1p and Sko1p and induced by NaCl, KCl, and sorbitol through Gcn4p	3.97396e-09	3.51247e-06	0.00622195	0.0103563	0.312061	0.613398	0.348336	1.30989	1.02807	0.00964802	0.230785	0.454535	0.264236	0.769554	0.455391	0.386669	0.388219	0.561267	0.735396	0.968556	-0.104394	-0.261956	-0.177193	-0.0383453	0.770204	0.559834	0.623749	0.688654	0.925481	0.772115	-0.229153	-0.134939	-0.246726	0.398537	0.9199	0.51394	0.557295	0.662995	0.884205	0.865369	-0.190989	-0.184572	-0.228939	0.253072	0.892987
853274	HAL5	YJL165C	S000003701	Putative protein kinase; overexpression increases sodium and lithium tolerance, whereas gene disruption increases cation and low pH sensitivity and impairs potassium uptake, suggesting a role in regulation of Trk1p and/or Trk2p transporters; HAL5 has a paralog, KKQ8, that arose from the whole genome duplication	3.59425e-10	1.17892e-09	1.62272e-07	0.0691022	0.5352	0.536364	0.574531	2.91165	1.05994	0.0432104	0.364094	0.348013	0.323743	1.16619	0.458522	-0.0183537	0.436054	0.726668	0.743751	0.825298	-0.569924	-0.423357	0.0341474	0.115481	0.714494	0.367288	0.561402	0.75229	0.915136	0.290605	-0.342836	-0.29918	-0.148262	0.866961	0.771375	0.30521	0.581786	0.814959	0.956546	0.450073	-0.430697	-0.357476	-0.116562	0.759872	0.828032
851303	HBT1	YDL223C	S000002382	Shmoo tip protein, substrate of Hub1p ubiquitin-like protein; mutants are defective for mating projection formation, thereby implicating Hbt1p in polarized cell morphogenesis; HBT1 has a paralog, YNL195C, that arose from the whole genome duplication	1.04205e-07	3.40731e-06	7.20049e-05	0.185596	0.302174	0.117454	0.289157	1.77854	0.822737	0.150174	0.279106	0.0963807	0.238312	0.982675	0.432489	0.113607	0.515958	0.561637	0.785293	0.906238	-0.539034	-0.100874	-0.239811	0.0870884	0.746158	0.281462	0.520427	0.727138	0.983523	0.495213	-0.376832	-0.317264	-0.268511	0.748857	0.797498	0.249876	0.55313	0.725399	0.988803	0.650014	-0.449784	-0.273565	-0.277523	0.600734	0.834361
854402	HER1	YOR227W	S000005753	Protein of unknown function; required for proliferation or remodeling of the ER that is caused by overexpression of Hmg2p; may interact with ribosomes, based on co-purification experiments; HER1 has a paralog, GIP3, that arose from the whole genome duplication	6.51434e-12	7.1211e-06	0.000628104	-0.214793	0.419236	0.510292	0.277513	1.74825	0.782621	-0.162925	0.385076	0.438852	0.200029	0.879484	0.292044	0.0196532	0.354639	0.623156	0.749888	0.923148	-0.428933	-0.387465	-0.11249	0.0253938	0.693056	0.365247	0.57993	0.770288	0.98548	0.719863	-0.368313	-0.29989	-0.213096	0.526682	0.894402	0.234998	0.510977	0.743534	0.931068	0.840109	-0.411343	-0.351215	-0.180163	0.337609	0.850334
855293	HOR7	YMR251W-A	S000004864	Protein of unknown function; overexpression suppresses Ca2+ sensitivity of mutants lacking inositol phosphorylceramide mannosyltransferases Csg1p and Csh1p; transcription is induced under hyperosmotic stress and repressed by alpha factor; HOR7 has a paralog, DDR2, that arose from the whole genome duplication	1e-16	7.77156e-16	6.66134e-16	0.265124	0.106433	0.142453	0.614422	6.16364	3.38821	0.296645	0.268469	0.346558	1.11737	3.67077	1.47206	-0.256475	0.0273395	0.240003	0.481298	0.895722	-0.291057	-0.287416	-0.286801	-0.286923	0.350158	0.224508	0.471829	0.716801	0.979666	0.491054	-0.372314	-0.364868	-0.277501	0.748137	0.766657	0.153465	0.4338	0.698022	0.984116	0.621873	-0.395253	-0.387777	-0.308325	0.622947	0.764935
854149	HRD1	YOL013C	S000005373	Ubiquitin-protein ligase involved in ER-associated degradation (ERAD) of misfolded proteins; upon autoubiquitination triggers retrotranslocation of misfolded proteins to cytosol for degradation; genetically linked to the unfolded protein response (UPR); regulated through association with Hrd3p; contains an H2 ring finger; likely plays a general role in targeting proteins that persistently associa…	9.17932e-13	0.00037968	2.24885e-05	-0.269525	0.210449	0.603036	0.0971789	1.86557	0.134091	-0.129852	0.096863	0.258832	0.0372838	0.580408	0.0359024	0.30375	0.525087	0.747667	0.775168	0.927146	-0.360438	-0.338912	0.0225811	0.0533729	0.846403	0.52812	0.70842	0.806495	0.956536	0.567641	-0.367968	-0.185939	-0.127906	0.642292	0.934804	0.459526	0.670125	0.831342	0.935047	0.7682	-0.388123	-0.267714	-0.067389	0.414551	0.954374
850786	HRT3	YLR097C	S000004087	Putative SCF-ubiquitin ligase F-box protein; based on both genetic and physical interactions and sequence similarity; identified in association with Cdc53p, Skp1p and Ubi4 in large and small-scale studies	1.19574e-08	5.89126e-07	0.00290439	0.0625375	0.31241	0.459966	0.475948	1.53268	0.952623	0.0393835	0.179871	0.268292	0.261685	0.677234	0.369897	0.323362	0.41711	0.643062	0.802697	0.956366	-0.204245	-0.335151	-0.152581	0.0589741	0.804227	0.503385	0.630053	0.792185	0.97371	0.652844	-0.293576	-0.265868	-0.168828	0.578812	0.926918	0.462702	0.583294	0.773265	0.954582	0.780584	-0.275113	-0.299629	-0.170017	0.426878	0.92219
856387	HSE1	YHL002W	S000000994	Subunit of the endosomal Vps27p-Hse1p complex; complex is required for sorting of ubiquitinated membrane proteins into intralumenal vesicles prior to vacuolar degradation, as well as for recycling of Golgi proteins and formation of lumenal membranes	3.37454e-10	5.67102e-13	6.25502e-08	0.0914473	0.643288	1.07911	0.93885	2.91654	2.10347	0.0412809	0.33088	0.55754	0.46793	1.0848	0.702202	-0.489715	-0.180543	0.202428	0.462094	0.724213	-0.261344	-0.499956	-0.312922	-0.139705	0.188152	0.333329	0.562001	0.738444	0.996731	0.617575	-0.377552	-0.279846	-0.270049	0.643201	0.85395	0.124143	0.408876	0.673249	0.967156	0.734713	-0.393048	-0.386067	-0.320108	0.488653	0.764346
851751	HSP42	YDR171W	S000002578	Small heat shock protein (sHSP) with chaperone activity; forms barrel-shaped oligomers that suppress unfolded protein aggregation; involved in cytoskeleton reorganization after heat shock; protein abundance increases and forms cytoplasmic foci in response to DNA replication stress	1.43108e-12	2.09813e-10	2.90082e-07	0.399072	0.292621	0.313098	0.563799	2.62794	1.67364	0.388865	0.469398	0.526443	0.536908	1.66258	0.820534	-0.0507259	0.306293	0.649798	0.677958	0.877628	-0.438159	-0.484363	0.0142394	-0.0200714	0.642365	0.19646	0.498837	0.802425	0.969321	0.616248	-0.434524	-0.445583	-0.149538	0.609857	0.817524	0.131554	0.465946	0.797148	0.930508	0.726979	-0.457826	-0.480106	-0.107523	0.45003	0.806186
851845	HSP78	YDR258C	S000002666	Oligomeric mitochondrial matrix chaperone; cooperates with Ssc1p in mitochondrial thermotolerance after heat shock; able to prevent the aggregation of misfolded proteins as well as resolubilize protein aggregates	1e-16	3.7076e-09	4.02986e-07	0.266562	0.141337	0.270186	0.539739	2.64384	1.46909	0.366413	0.275095	0.403625	0.43348	1.30046	0.445453	0.278176	0.516127	0.718482	0.792692	0.937959	-0.374678	-0.311091	-0.03874	0.0647266	0.837001	0.331027	0.596508	0.824104	0.961731	0.741576	-0.423502	-0.351122	-0.110853	0.474929	0.905449	0.317404	0.577874	0.800522	0.915986	0.836376	-0.413555	-0.343053	-0.084628	0.322265	0.898489
853138	HSV2	YGR223C	S000003455	Phosphatidylinositol 3,5-bisphosphate-binding protein; plays a role in micronucleophagy; belongs to the PROPPIN family of proteins; predicted to fold as a seven-bladed beta-propeller; displays punctate cytoplasmic localization	4.73018e-09	0.00201325	5.02887e-07	-1.0557	-0.0594521	0.521216	0.138661	1.40973	1.0089	-0.456561	-0.024613	0.221214	0.0574256	0.475551	0.309805	-0.34016	-0.148174	0.334081	0.57836	0.758871	-0.152733	-0.635644	-0.283356	-0.0272972	0.307922	0.580854	0.66513	0.739749	0.95038	0.652922	-0.260477	-0.151147	-0.209668	0.549224	0.931732	0.367834	0.499913	0.718698	0.971979	0.785669	-0.264511	-0.33189	-0.265233	0.443799	0.868409
853185	HUA1	YGR268C	S000003500	Cytoplasmic protein containing a zinc finger domain; sequence similarity to that of Type I J-proteins; computational analysis of large-scale protein-protein interaction data suggests a possible role in actin patch assembly	1.92088e-10	2.017e-10	1.93874e-08	-0.0293197	0.361624	0.531768	0.630515	3.03499	1.45264	-0.0247493	0.353865	0.494401	0.521372	1.53864	0.771805	-0.260609	0.154783	0.485972	0.678571	0.819496	-0.456396	-0.456212	-0.206332	0.0388355	0.494265	0.349374	0.56253	0.749503	0.9495	0.375935	-0.362177	-0.294014	-0.195468	0.825098	0.795067	0.253663	0.52797	0.761676	0.978016	0.501864	-0.414171	-0.354061	-0.215208	0.735239	0.803557
850614	HXK1	YFR053C	S000001949	Hexokinase isoenzyme 1; a cytosolic protein that catalyzes phosphorylation of glucose during glucose metabolism; expression is highest during growth on non-glucose carbon sources; glucose-induced repression involves hexokinase Hxk2p; HXK1 has a paralog, HXK2, that arose from the whole genome duplication	1e-16	1.44057e-11	6.181e-09	0.140856	0.0782572	0.39662	0.946053	2.56691	2.59826	0.502754	0.335054	1.25923	1.9412	2.78226	0.891543	0.199965	0.329685	0.477501	0.666224	0.998842	-0.217057	-0.223612	-0.20208	-0.156127	0.676296	0.338899	0.554779	0.7399	0.902816	0.882836	-0.362847	-0.290934	-0.149302	0.259146	0.885559	0.297202	0.487354	0.663431	0.839256	0.944303	-0.319258	-0.273626	-0.171498	0.117281	0.831331
853646	HYM1	YKL189W	S000001672	Component of the RAM signaling network; is involved in regulation of Ace2p activity and cellular morphogenesis, interacts with Kic1p and Sog2p, localizes to sites of polarized growth during budding and during the mating response	2.22418e-05	3.30205e-09	0.00481829	0.422544	0.457109	0.886976	0.545048	1.5445	1.24249	0.195546	0.237951	0.475893	0.283041	0.728103	0.487437	-0.451435	-0.277913	0.129831	0.258398	0.726063	-0.0998998	-0.525721	-0.152664	-0.399212	0.0925529	0.120087	0.426961	0.61279	0.943352	0.796594	-0.41998	-0.282076	-0.371113	0.396662	0.757685	-0.107713	0.184843	0.491497	0.781673	0.877356	-0.341523	-0.425603	-0.329334	0.11139	0.578629
854855	HYR1	YIR037W	S000001476	Thiol peroxidase; functions as a hydroperoxide receptor to sense intracellular hydroperoxide levels and transduce a redox signal to the Yap1p transcription factor; HYR1 has a paralog, GPX1, that arose from the whole genome duplication	1e-16	1.11485e-08	1.68647e-07	0.364643	0.130119	0.503411	0.508075	2.77332	0.54795	0.313895	0.120385	0.376572	0.241729	0.802262	0.114052	0.359678	0.569669	0.771098	0.85466	0.897811	-0.360903	-0.313955	-0.0465323	0.183258	0.893313	0.381711	0.641266	0.840633	0.968402	0.682908	-0.429434	-0.316684	-0.0971142	0.542034	0.922741	0.379007	0.620866	0.825043	0.935018	0.794686	-0.406334	-0.321571	-0.0758029	0.388028	0.927134
855506	IES2	YNL215W	S000005159	Protein that associates with the INO80 chromatin remodeling complex; associates with the INO80 complex under low-salt conditions; essential for growth under anaerobic conditions; protein abundance increases in response to DNA replication stress	9.5637e-07	1.54498e-05	0.00287492	-0.119144	0.223213	0.378889	0.412904	1.42582	0.683148	-0.0627719	0.135442	0.233272	0.22075	0.664101	0.281269	-0.31797	0.0472432	0.432429	0.519306	0.809981	-0.377728	-0.520405	-0.0767119	-0.153105	0.39035	0.289039	0.570951	0.834411	0.973658	0.612661	-0.433164	-0.397277	-0.112111	0.61893	0.86741	0.072871	0.422048	0.766439	0.900402	0.765552	-0.460983	-0.494432	-0.110642	0.373377	0.77238
854361	IES4	YOR189W	S000005715	Component of the INO80 chromatiin remodeling complex; target of the Mec1p/Tel1p DNA damage signaling pathway; proposed to link chromatin remodeling to replication checkpoint responses	1.93908e-11	2.87836e-05	0.00196919	-0.222076	0.208	0.62936	0.599313	1.42004	0.290352	-0.0909911	0.0813069	0.251131	0.2184	0.42619	0.0768364	0.208181	0.353668	0.652399	0.838547	0.929988	-0.239178	-0.427926	-0.185403	0.1307	0.768454	0.534717	0.685472	0.837619	0.955409	0.616428	-0.332344	-0.256723	-0.0847237	0.592078	0.949356	0.412391	0.568488	0.795733	0.950955	0.792047	-0.306695	-0.348501	-0.135286	0.410826	0.915203
850572	IGD1	YFR017C	S000001913	Cytoplasmic protein that inhibits Gdb1p glycogen debranching activity; required for normal intracellular accumulation of glycogen; phosphorylated in vivo; expression increases during wine fermentation; protein abundance increases in response to DNA replication stress; IGD1 has a paralog, YOL024W, that arose from the whole genome duplication	6.12581e-07	2.08467e-09	6.33054e-05	0.450895	0.251316	0.4449	0.733363	1.92862	1.68702	0.363999	0.227878	0.448679	0.798143	1.73572	0.94211	-0.329403	-0.415297	-0.295512	0.022417	0.668255	0.195911	-0.128843	-0.424826	-0.639899	-0.121019	0.13875	0.375308	0.631305	0.932181	0.838366	-0.335982	-0.372253	-0.332141	0.340759	0.758953	-0.0207706	0.132152	0.381864	0.745484	0.927039	-0.187932	-0.345163	-0.430647	0.0159317	0.551813
853363	IML2	YJL082W	S000003618	Protein required for clearance of inclusion bodies; localizes to the inclusion bodies formed under protein misfolding stress; the authentic, non-tagged protein is detected in highly purified mitochondria in high-throughput studies; protein abundance increases in response to DNA replication stress; IML2 has a paralog, YKR018C, that arose from the whole genome duplication	1.11022e-16	2.63234e-13	3.66213e-11	0.0751688	0.306375	0.743521	0.598511	3.77714	2.66893	0.0788253	0.302455	0.617791	0.451446	1.54396	0.872002	0.315497	0.512066	0.691752	0.829375	0.940809	-0.332221	-0.280365	-0.121004	0.108278	0.846945	0.415615	0.618592	0.765951	0.988851	0.641384	-0.366849	-0.245167	-0.223177	0.609424	0.8986	0.401394	0.608854	0.769413	0.976192	0.74153	-0.368752	-0.26213	-0.20252	0.493266	0.912182
854652	IMP2'	YIL154C	S000001416	Transcriptional activator involved in maintenance of ion homeostasis; also involved in protection against DNA damage caused by bleomycin and other oxidants; contains a C-terminal leucine-rich repeat	1e-16	8.77076e-14	1.4919e-11	0.155896	0.220393	0.721099	0.777519	4.04871	2.44484	0.11521	0.143666	0.414234	0.375939	1.19238	0.569674	0.395269	0.549568	0.722059	0.83638	0.92356	-0.299886	-0.273588	-0.0892028	0.134386	0.881747	0.434889	0.641459	0.801926	0.981164	0.649879	-0.376499	-0.264509	-0.165189	0.591207	0.919382	0.433987	0.629006	0.797999	0.96071	0.759211	-0.36165	-0.274991	-0.144586	0.456002	0.932811
851644	IPT1	YDR072C	S000002479	Inositolphosphotransferase; involved in synthesis of mannose-(inositol-P)2-ceramide (M(IP)2C), the most abundant sphingolipid; can mutate to resistance to the antifungals syringomycin E and DmAMP1 and to K. lactis zymocin	2.51203e-10	2.32037e-14	3.833e-07	0.740431	0.917197	1.25666	1.265	3.33154	1.3803	0.285815	0.464875	0.531179	0.526763	1.09171	0.441752	-0.324935	0.234014	0.383922	0.54389	0.788008	-0.620941	-0.21908	-0.172887	-0.100036	0.428174	0.190941	0.593404	0.715676	0.904278	0.328508	-0.559662	-0.209577	-0.183651	0.815323	0.736281	0.0279193	0.547671	0.698201	0.903983	0.547181	-0.664836	-0.24398	-0.206723	0.596277	0.730604
852437	IRA1	YBR140C	S000000344	GTPase-activating protein; negatively regulates RAS by converting it from GTP- to the GDP-bound inactive form, required for reducing cAMP levels under nutrient limiting conditions, mediates membrane association of adenylate cyclase; mutations cause catalase T deficiency, defective glycogen synthesis and defective trehalose accumulation; IRA1 has a paralog, IRA2, that arose from the whole genome d…	2.92267e-07	1.73838e-05	0.00308601	0.107333	0.367599	0.603116	0.407757	1.85046	0.761437	0.0613965	0.254471	0.347612	0.214685	0.789998	0.298335	0.0294171	0.51093	0.702027	0.708077	0.852801	-0.616863	-0.295587	0.0462134	0.042853	0.734526	0.346907	0.686084	0.802378	0.955921	0.514792	-0.520928	-0.208668	-0.132652	0.694363	0.876187	0.251228	0.669387	0.82267	0.931209	0.68115	-0.595487	-0.257013	-0.0741687	0.496746	0.886121
856180	ISA2	YPR067W	S000006271	Protein required for maturation of mitochondrial [4Fe-4S] proteins; functions in a complex with Isa1p and possibly Iba57p; localizes to the mitochondrial intermembrane space, overexpression of ISA2 suppresses grx5 mutations	6.26073e-11	0.598691	2.553e-09	-2.02812	-0.220351	0.228452	0.113003	1.84668	0.38277	-0.803765	-0.0880916	0.0948415	0.0424281	0.554043	0.104919	-0.476431	-0.150385	0.269433	0.473207	0.718431	-0.286207	-0.551706	-0.237082	-0.119867	0.220798	0.585935	0.675549	0.809515	0.94238	0.528062	-0.268574	-0.23157	-0.105948	0.663965	0.926687	0.262394	0.47946	0.773977	0.971777	0.745581	-0.34408	-0.431925	-0.190812	0.483631	0.847135
851442	IWR1	YDL115C	S000002273	RNA polymerase II transport factor, conserved from yeast to humans; also has a role in transporting RNA polymerase III into the nucleus; interacts with most of the RNAP II subunits; nucleo-cytoplasmic shuttling protein; deletion causes hypersensitivity to K1 killer toxin; protein increases in abundance and relocalizes from nucleus to cytoplasm upon DNA replication stress	3.56149e-08	4.40586e-07	0.000134121	-0.357079	0.403214	0.88376	0.546512	1.63329	0.915703	-0.17379	0.215692	0.459401	0.271016	0.641714	0.331109	-0.323993	0.0502443	0.454048	0.662445	0.768065	-0.387548	-0.545615	-0.228764	0.0698692	0.426557	0.460131	0.670864	0.764515	0.9755	0.590711	-0.388453	-0.177121	-0.208216	0.64321	0.907579	0.198177	0.502785	0.735331	0.972261	0.738887	-0.437802	-0.350571	-0.243274	0.490937	0.826918
853351	KHA1	YJL094C	S000003630	Putative K+/H+ antiporter; has a probable role in intracellular cation homeostasis; localized to Golgi vesicles and detected in highly purified mitochondria in high-throughput studies	5.21427e-12	1.35727e-11	6.00601e-10	-0.0957822	0.704587	0.819473	0.443903	3.67572	1.21938	-0.0548719	0.42271	0.435582	0.248494	1.28533	0.450346	-0.0362744	0.390901	0.546888	0.736235	0.90558	-0.53073	-0.239272	-0.197544	0.0256918	0.66093	0.400967	0.553268	0.651538	0.919013	0.297759	-0.298869	-0.174294	-0.28834	0.864711	0.749613	0.335944	0.57545	0.699624	0.977916	0.48612	-0.391949	-0.210752	-0.298333	0.750857	0.812988
852503	LDH1	YBR204C	S000000408	Serine hydrolase; exhibits active esterase plus weak triacylglycerol lipase activities; proposed role in lipid homeostasis, regulating phospholipid and non-polar lipid levels and required for mobilization of LD-stored lipids; localizes to the lipid droplet (LD) surface; contains a classical serine containing catalytic triad (GxSxG motif)	1e-16	1.17423e-10	8.39026e-08	0.0400128	0.395922	0.495316	0.630103	2.95572	1.68719	0.0311971	0.281223	0.360095	0.343015	1.07598	0.452097	0.304555	0.478271	0.706066	0.804458	0.943039	-0.300415	-0.342317	-0.0702807	0.0745294	0.833029	0.426823	0.600943	0.813698	0.976272	0.700523	-0.333317	-0.33155	-0.143207	0.534375	0.919586	0.393867	0.572936	0.797512	0.940986	0.811199	-0.330846	-0.345262	-0.120289	0.379065	0.914337
856053	LEE1	YPL054W	S000005975	Zinc-finger protein of unknown function	1.6878e-07	1.04806e-05	0.000152428	0.269443	-0.115835	0.240504	0.245985	1.72527	0.856755	0.426189	-0.172966	0.387312	0.322965	1.37783	0.654278	0.449447	0.353183	0.672206	0.777267	0.879488	0.00270168	-0.455113	-0.0813148	0.103686	0.798833	0.308142	0.556369	0.768694	0.975888	0.479167	-0.395616	-0.327554	-0.2031	0.755245	0.819799	0.365841	0.540815	0.795335	0.989822	0.616066	-0.318243	-0.382971	-0.184984	0.635971	0.869616
853571	LIH1	YJR107W	S000003868	Putative lipase	6.51206e-07	3.07868e-06	1.31867e-05	0.0799435	0.0915093	0.3533	0.187855	2.02408	0.797787	0.0442224	0.0487	0.206348	0.105777	0.866696	0.330178	0.0444404	-0.0651209	0.327409	0.520279	0.897118	0.126813	-0.521637	-0.218842	-0.239011	0.426956	0.325763	0.462697	0.67779	0.972097	0.437385	-0.259508	-0.32408	-0.320266	0.792232	0.76101	0.29212	0.376946	0.677346	0.98647	0.640137	-0.184684	-0.431951	-0.339043	0.60766	0.77808
853037	LSB1	YGR136W	S000003368	Negative regulator of actin nucleation-promoting factor activity; interacts with Las17p, a homolog of human Wiskott-Aldrich Syndrome protein (WASP), via an N-terminal SH3 domain, and along with PIN3 cooperatively inhibits the nucleation of actin filaments; overexpression blocks receptor-mediated endocytosis; protein increases in abundance and forms nuclear foci in response to DNA replication stre…	6.12088e-12	1.52287e-08	2.3851e-05	0.104518	0.164958	0.675772	0.494003	2.05643	1.19342	0.0683017	0.133039	0.465937	0.302601	0.888572	0.452168	0.0695683	0.420857	0.699175	0.823602	0.883514	-0.462778	-0.405696	-0.103741	0.158269	0.75618	0.324965	0.645531	0.790577	0.976367	0.609701	-0.491574	-0.244131	-0.174347	0.625317	0.883104	0.250145	0.593356	0.789381	0.96128	0.726263	-0.500397	-0.308523	-0.156869	0.489671	0.873297
853205	MAL13	YGR288W	S000003520	MAL-activator protein; part of complex locus MAL1; nonfunctional in genomic reference strain S288C	9.75456e-07	5.10018e-05	0.00115006	0.0305624	0.245068	0.250073	0.198825	1.49698	0.619833	0.0276115	0.196771	0.214813	0.147076	0.897716	0.352817	0.37395	0.444185	0.732502	0.654887	0.904474	-0.187905	-0.420899	0.154381	-0.0761	0.796802	0.482025	0.576095	0.79181	0.957245	0.463304	-0.246684	-0.333616	-0.148505	0.747526	0.861348	0.494651	0.590343	0.848835	0.955393	0.642718	-0.252081	-0.392099	-0.0696568	0.56577	0.923371
855548	MDG1	YNL173C	S000005117	Plasma membrane protein; involved in G-protein mediated pheromone signaling pathway; overproduction suppresses bem1 mutations; MDG1 has a paralog, CRP1, that arose from the whole genome duplication	1e-16	0.0452008	0.00023931	0.148514	-0.0353062	0.438769	0.0209296	1.29823	-0.535149	0.184312	-0.0586573	0.535506	0.0153789	0.60953	-0.159267	0.301182	0.525068	0.745215	0.821471	0.921713	-0.362983	-0.335646	-0.0392776	0.117375	0.856714	0.344725	0.644055	0.821609	0.956057	0.736746	-0.469947	-0.287632	-0.107023	0.472582	0.918212	0.328501	0.593959	0.797339	0.903796	0.848237	-0.422804	-0.318437	-0.0734783	0.294984	0.903642
850758	MEF1	YLR069C	S000004059	Mitochondrial elongation factor involved in translational elongation	6.49103e-12	1.31806e-05	0.00117511	-0.295373	0.204879	0.934867	0.350523	1.52922	0.326831	-0.148643	0.121716	0.469833	0.153216	0.540368	0.100827	0.070246	0.449037	0.747631	0.793946	0.858334	-0.497746	-0.43506	-0.00121832	0.145937	0.764613	0.440936	0.769151	0.823858	0.934619	0.578317	-0.531972	-0.132414	-0.076888	0.603892	0.933905	0.295339	0.666128	0.836788	0.92423	0.741589	-0.547253	-0.280076	-0.0463999	0.427479	0.910243
851365	MFG1	YDL233W	S000002392	Regulator of filamentous growth; interacts with FLO11 promoter and regulates FLO11 expression; binds to transcription factors Flo8p and Mss11p; green fluorescent protein (GFP)-fusion protein localizes to the nucleus; YDL233W is not an essential gene	0.00190618	3.35943e-07	0.00190618	0.00652256	0.547934	0.673602	0.443468	1.49345	0.354536	0.00323617	0.293195	0.379395	0.246991	0.744591	0.153953	-0.449522	-0.234446	0.0753205	0.25776	0.759958	-0.152969	-0.397606	-0.224991	-0.433914	0.0962297	0.30099	0.404284	0.603579	0.975217	0.483235	-0.210393	-0.298402	-0.423777	0.750328	0.72862	-0.108841	0.104653	0.445119	0.811599	0.831553	-0.241218	-0.464812	-0.429411	0.195048	0.540936
853464	MHO1	YJR008W	S000003768	Protein of unknown function; inhibits haploid invasive growth when overexpressed; synthetically lethal with phospholipase C (PLC1); expression induced by mild heat-stress on a non-fermentable carbon source, upon entry into stationary phase and upon nitrogen deprivation; repressed by inosine and choline in an Opi1p-dependent manner; highly conserved from bacteria to human; Memo, the human homolog,…	1.92957e-13	1.46911e-09	5.5511e-09	0.134967	-0.0672192	0.23004	0.23746	2.78486	1.96292	0.128577	-0.0642584	0.233025	0.232237	1.50867	0.782431	0.184898	0.223441	0.441126	0.678056	0.986591	-0.0977346	-0.3092	-0.265848	-0.12891	0.633625	0.304323	0.508373	0.715839	0.996253	0.693572	-0.338723	-0.317353	-0.299773	0.5666	0.842651	0.288593	0.458682	0.680538	0.964698	0.812614	-0.2916	-0.332845	-0.30722	0.407642	0.832434
853801	MNR2	YKL064W	S000001547	Vacuolar membrane protein required for magnesium homeostasis; putative magnesium transporter; has similarity to Alr1p and Alr2p, which mediate influx of Mg2+ and other divalent cations; localizes to sites of contact between the vacuole and mitochondria (vCLAMPs)	1.34488e-06	0.000330203	0.00952737	-0.12145	0.342893	0.680205	0.107179	1.2758	0.409972	-0.0675105	0.226627	0.40207	0.0601767	0.595918	0.172171	-0.169982	0.301846	0.611484	0.639106	0.820961	-0.55179	-0.438584	0.0119786	-0.0125485	0.580807	0.342002	0.654374	0.713053	0.969746	0.562004	-0.485723	-0.128936	-0.269982	0.664639	0.85433	0.141775	0.564892	0.747858	0.926942	0.748175	-0.572763	-0.288818	-0.169142	0.424324	0.824939
853379	MPM1	YJL066C	S000003602	Mitochondrial intermembrane space protein of unknown function	3.33067e-16	9.69649e-11	3.58427e-10	0.0796809	-0.0891458	0.473873	0.597874	3.64159	1.74254	0.121013	-0.123117	0.499761	0.474424	1.62999	0.624032	0.402282	0.554174	0.721476	0.797665	0.93284	-0.298698	-0.266982	-0.0410131	0.0761352	0.875717	0.418309	0.659382	0.817597	0.974289	0.564568	-0.415751	-0.262861	-0.135467	0.66782	0.904785	0.433224	0.657789	0.826402	0.965287	0.707129	-0.398821	-0.27669	-0.112268	0.513874	0.938803
852741	MRM2	YGL136C	S000003104	Mitochondrial 2' O-ribose methyltransferase; required for methylation of U(2791) in 21S rRNA; MRM2 deletion confers thermosensitive respiration and loss of mitochondrial DNA; has similarity to Spb1p and Trm7p, and to E. coli FtsJ/RrmJ	1.37768e-05	4.63662e-11	9.797e-06	0.214022	0.637008	0.624103	0.96982	2.3205	1.49709	0.0871264	0.251682	0.253033	0.410619	0.832029	0.501313	-0.336466	-0.389069	-0.36078	0.0863537	0.648147	0.155671	-0.00810007	-0.593267	-0.538917	-0.121168	0.453436	0.536903	0.72612	0.983761	0.554463	-0.225698	-0.295058	-0.270178	0.689907	0.852271	0.312235	0.372972	0.56222	0.962703	0.752093	-0.159541	-0.282521	-0.463436	0.46564	0.765538
851694	MRPL1	YDR116C	S000002523	Mitochondrial ribosomal protein of the large subunit	2.23726e-09	1.42535e-06	0.000487668	-0.190362	0.403664	0.735103	0.517628	1.54384	0.459069	-0.0739312	0.216359	0.383491	0.22753	0.618834	0.156411	-0.517519	-0.0534179	0.32923	0.393815	0.663256	-0.44995	-0.509277	-0.0564324	-0.165115	0.22215	0.0489684	0.50974	0.78309	0.912813	0.593184	-0.595807	-0.405849	-0.104002	0.561443	0.762056	-0.264191	0.248059	0.612276	0.71935	0.696435	-0.577964	-0.507682	-0.0884592	0.213478	0.54061
852242	MRPL16	YBL038W	S000000134	Mitochondrial ribosomal protein of the large subunit; homologous to bacterial L16 ribosomal protein; synthetic lethality with hac1 mutation suggests a possible role in synthesis of precursors for protein glycosylation	1.08432e-07	4.57038e-08	0.00250951	0.111631	0.345195	0.644464	0.563212	1.45766	1.30082	0.0337375	0.103332	0.220882	0.184873	0.425355	0.33053	-0.307181	-0.423718	0.0678933	0.366439	0.686718	0.228784	-0.627053	-0.372425	-0.223205	0.0868887	0.247471	0.300621	0.618478	0.932581	0.814421	-0.132788	-0.449517	-0.349857	0.365211	0.753192	0.039918	0.0274625	0.44728	0.78426	0.837402	0.00518039	-0.565351	-0.39193	0.154617	0.546454
855231	MRPL24	YMR193W	S000004806	Mitochondrial ribosomal protein of the large subunit; two mitochondrial ribosomal proteins, YmL14 and YmL24, have been assigned to the same gene	0.00156356	0.000873299	0.00315245	-0.241347	0.264866	0.529396	0.236412	1.29228	0.13478	-0.104343	0.112604	0.237905	0.0991752	0.495148	0.0496676	-0.202438	-0.0699451	0.39127	0.429388	0.829206	-0.113963	-0.613418	-0.0181939	-0.286069	0.35054	0.539756	0.580844	0.730538	0.901749	0.311331	-0.19496	-0.245403	-0.160513	0.829301	0.808837	0.318554	0.424101	0.796824	0.954119	0.703715	-0.217896	-0.532601	-0.137823	0.50316	0.836788
853684	MRPL38	YKL170W	S000001653	Mitochondrial ribosomal protein of the large subunit; appears as two protein spots (YmL34 and YmL38) on two-dimensional SDS gels; protein abundance increases in response to DNA replication stress	1.56289e-07	0.000352617	0.00620795	0.0416013	-0.131008	0.495273	0.398585	1.27054	0.3002	0.0199283	-0.0776792	0.292823	0.213067	0.596625	0.115072	-0.265103	-0.0453017	0.326055	0.50614	0.865868	-0.207801	-0.494751	-0.202774	-0.225646	0.35376	0.0636482	0.525831	0.746198	0.924667	0.651434	-0.601481	-0.336	-0.168492	0.518187	0.774883	-0.0958641	0.293092	0.613395	0.811755	0.829534	-0.4666	-0.45222	-0.203842	0.197263	0.64465
855190	MRPS8	YMR158W	S000004767	Mitochondrial ribosomal protein of the small subunit	0.000111649	0.210713	0.00649224	-0.311151	-0.209128	0.339529	0.0078666	0.991851	-0.102992	-0.138728	-0.0973322	0.159581	0.00323464	0.388426	-0.0384854	-0.0558414	0.125422	0.601889	0.468501	0.800322	-0.21449	-0.64887	0.214906	-0.20771	0.502613	0.412936	0.724874	0.865677	0.886288	0.353564	-0.503966	-0.244526	0.0403523	0.767511	0.865431	0.262969	0.577704	0.92479	0.870068	0.665772	-0.467774	-0.509993	0.140178	0.434787	0.873042
854911	MSC1	YML128C	S000004597	Protein of unknown function; mutant is defective in directing meiotic recombination events to homologous chromatids; the authentic, non-tagged protein is detected in highly purified mitochondria and is phosphorylated	1.15384e-11	4.65805e-11	6.06605e-08	0.33632	0.0524164	0.706893	0.542537	2.47732	2.31282	0.247807	0.0567501	0.627635	0.50257	1.60044	0.982308	-0.266251	-0.00395383	0.198655	0.421183	0.888608	-0.26125	-0.271524	-0.266236	-0.355849	0.309136	0.186633	0.52821	0.673292	0.948206	0.78821	-0.481506	-0.235177	-0.29608	0.411186	0.817377	0.0736062	0.419082	0.591463	0.872726	0.876873	-0.456495	-0.263429	-0.31039	0.227047	0.737147
855651	MSK1	YNL073W	S000005017	Mitochondrial lysine-tRNA synthetase; required for import of both aminoacylated and deacylated forms of tRNA(Lys) into mitochondria and for aminoacylation of mitochondrially encoded tRNA(Lys)	5.1581e-13	9.07878e-06	2.09082e-06	-0.363502	0.461107	0.540864	0.504685	2.24749	0.122575	-0.208247	0.211383	0.245646	0.207467	0.695379	0.0353986	0.411538	0.548045	0.730383	0.836594	0.918375	-0.281691	-0.286683	-0.0783047	0.139842	0.886242	0.630104	0.679512	0.791195	0.903666	0.414049	-0.229418	-0.201978	-0.0815574	0.729008	0.89649	0.584001	0.673621	0.823127	0.941139	0.656182	-0.268069	-0.25227	-0.0861169	0.534276	0.957333
852915	MSP1	YGR028W	S000003260	Highly-conserved N-terminally anchored AAA-ATPase; distributed in the mitochondrial outer membrane and peroxisomes; involved in mitochondrial protein sorting; functions as an extraction engine in local organelle surveillance to remove and initiate degradation of mistargeted proteins, ensuring fidelity of organelle-specific localization of tail-anchored proteins; contains an N-terminal transmembra…	1.8695e-09	0.00615799	4.76092e-05	-0.352972	-0.25844	0.00507035	0.193156	1.57155	0.636363	-0.173019	-0.130112	0.00255034	0.0965768	0.572172	0.216638	0.0382314	0.179535	0.426452	0.796468	0.920156	-0.188864	-0.34505	-0.435317	0.0873062	0.603392	0.349991	0.566285	0.75644	0.992943	0.567593	-0.366309	-0.298571	-0.241113	0.688391	0.852084	0.272422	0.478344	0.698546	0.992505	0.715743	-0.33264	-0.332136	-0.318232	0.539687	0.826141
853763	MTC2	YKL098W	S000001581	Protein of unknown function; mtc2 is synthetically sick with cdc13-1	4.62739e-10	1.87155e-10	1.55343e-05	-0.169323	0.776203	0.649018	0.866485	2.03581	1.72555	-0.0574117	0.233479	0.194641	0.271939	0.537196	0.410188	0.252573	0.317463	0.33683	0.726921	0.944568	-0.14899	-0.0503419	-0.467587	-0.025077	0.648129	0.628655	0.614564	0.708584	0.925118	0.684541	-0.148714	-0.173296	-0.219527	0.485651	0.919008	0.555116	0.562033	0.640003	0.914377	0.788187	-0.155805	-0.147733	-0.297951	0.368419	0.888034
851994	MUS81	YDR386W	S000002794	Subunit of structure-specific Mms4p-Mus81p endonuclease; cleaves branched DNA; involved in DNA repair, replication fork stability, and joint molecule formation/resolution during meiotic recombination; promotes template switching during break-induced replication (BIR), causing non-reciprocal translocations (NRTs); helix-hairpin-helix protein; phosphorylation of non-catalytic subunit Mms4p by Cdc28…	1.8335e-05	1.21911e-07	0.000555679	-0.0910999	0.660185	0.69652	0.197967	1.70374	1.01106	-0.0439945	0.302325	0.356684	0.102889	0.753304	0.391127	-0.384196	-0.352863	0.036494	0.184043	0.725626	0.0621442	-0.495302	-0.183836	-0.492828	0.0385919	0.440687	0.346713	0.51266	0.934209	0.618665	0.00212658	-0.249245	-0.493886	0.563026	0.734829	0.206416	0.141137	0.443282	0.857179	0.821367	0.0278902	-0.416201	-0.489529	0.262888	0.629622
854922	NAB6	YML117W	S000004585	Putative RNA-binding protein; associates with mRNAs encoding cell wall proteins in high-throughput studies; deletion mutants display increased sensitivity to some cell wall disrupting agents; expression negatively regulated by cAMP	3.95034e-09	0.00168718	0.00761374	-0.160885	0.422245	0.530607	-0.0253713	1.24023	0.202372	-0.107592	0.287084	0.395277	-0.016876	0.609499	0.0825632	0.0517404	0.28683	0.643448	0.759851	0.915668	-0.311074	-0.500461	-0.0978682	0.0454755	0.688399	0.393046	0.484103	0.682119	0.993139	0.641063	-0.219301	-0.302811	-0.341074	0.61517	0.833123	0.256298	0.42336	0.71203	0.951264	0.819261	-0.279215	-0.419776	-0.247975	0.384003	0.8226
856393	NEM1	YHR004C	S000001046	Probable catalytic subunit of Nem1p-Spo7p phosphatase holoenzyme; regulates nuclear growth by controlling phospholipid biosynthesis, required for normal nuclear envelope morphology and sporulation; homolog of the human protein Dullard	3.33067e-15	0.000785211	0.00120436	-0.304202	-0.0265679	0.406995	0.211618	1.32661	0.537489	-0.209655	-0.0132299	0.210274	0.106507	0.450172	0.149571	0.469454	0.477555	0.670059	0.876571	0.882872	-0.13461	-0.294915	-0.209806	0.225913	0.865049	0.572742	0.638196	0.745109	0.950182	0.69253	-0.234519	-0.192407	-0.202227	0.509365	0.932684	0.537912	0.580161	0.724834	0.933653	0.783463	-0.19594	-0.238615	-0.20852	0.397525	0.91841
855521	NNR1	YNL200C	S000005144	NADHX epimerase; catalyzes isomerization of (R)- and (S)-NADHX; homologous to AIBP in mammals and the N- terminal domain of YjeF in E.coli; enzyme is widespread in eukaryotes, prokaryotes and archaea; the authentic, non-tagged protein is detected in highly purified mitochondria in high-throughput studies	1.11022e-15	2.94858e-10	2.71258e-09	-0.0136223	0.0698974	0.343299	0.350534	2.91778	2.2627	-0.0111984	0.0712314	0.412565	0.303518	1.49878	0.754113	-4.59826e-05	0.186626	0.510969	0.671732	0.951293	-0.236111	-0.449471	-0.164145	-0.101612	0.594105	0.271156	0.492331	0.740483	0.978498	0.75993	-0.351598	-0.370708	-0.244251	0.477783	0.84778	0.197144	0.417185	0.700519	0.924585	0.854358	-0.330558	-0.412144	-0.229673	0.31516	0.804911
854384	NPT1	YOR209C	S000005735	Nicotinate phosphoribosyltransferase; acts in the salvage pathway of NAD+ biosynthesis; required for silencing at rDNA and telomeres and has a role in silencing at mating-type loci; localized to the nucleus	1.1054e-08	8.16975e-11	5.55604e-07	0.152717	0.360914	0.737112	1.00342	2.81024	1.24066	0.0759022	0.198717	0.389445	0.462007	1.0468	0.476077	-0.23969	0.136812	0.519531	0.588645	0.829557	-0.412744	-0.52397	-0.0475588	-0.0849735	0.481068	0.363303	0.640762	0.826289	0.904986	0.324711	-0.447203	-0.298076	-0.0361444	0.820017	0.818716	0.26013	0.597399	0.855361	0.941691	0.49105	-0.495527	-0.391931	-0.0435675	0.700105	0.839174
855566	NSG2	YNL156C	S000005100	Protein involved in regulation of sterol biosynthesis; specifically stabilizes Hmg2p, one of two HMG-CoA isoenzymes that catalyze the rate-limiting step in sterol biosynthesis; homolog of mammalian INSIG proteins; NSG2 has a paralog, NSG1, that arose from the whole genome duplication	6.16174e-14	1.08681e-07	8.3852e-05	-0.134561	0.738818	0.339636	0.566126	1.89423	0.897747	-0.0497011	0.399888	0.163487	0.232732	0.58742	0.244592	-0.259	0.303184	0.555363	0.70177	0.739681	-0.6425	-0.361597	-0.14258	0.147996	0.544881	0.152537	0.494658	0.783145	0.963804	0.628582	-0.473161	-0.425002	-0.168426	0.590544	0.802309	-0.0249406	0.431051	0.716194	0.889601	0.706479	-0.570182	-0.415633	-0.164391	0.418787	0.722939
856602	NVJ1	YHR195W	S000001238	Nuclear envelope protein; anchored to the nuclear inner membrane, that interacts with the vacuolar membrane protein Vac8p to promote formation of nucleus-vacuole junctions during piecemeal microautophagy of the nucleus (PMN)	9.76996e-15	9.45173e-07	8.4762e-05	-0.028181	-0.0989083	0.703552	0.47223	1.76597	0.898517	-0.0126867	-0.0562235	0.35308	0.194647	0.559552	0.234536	0.0970906	0.41354	0.727018	0.827055	0.878248	-0.426001	-0.452306	-0.0707542	0.167903	0.768122	0.292169	0.656468	0.823558	0.951785	0.688795	-0.538205	-0.274546	-0.0990035	0.515128	0.899097	0.219039	0.572685	0.804269	0.924069	0.784024	-0.505356	-0.354644	-0.0898248	0.384841	0.867495
850782	NYV1	YLR093C	S000004083	v-SNARE component of the vacuolar SNARE complex; involved in vesicle fusion; inhibits ATP-dependent Ca(2+) transport activity of Pmc1p in the vacuolar membrane	4.996e-15	6.67955e-11	5.05542e-09	-0.334895	0.15632	0.796707	0.804032	2.94337	1.92021	-0.130808	0.0630763	0.284716	0.25827	0.746004	0.44665	0.19814	0.532067	0.76876	0.829858	0.882289	-0.474877	-0.358383	-0.0182973	0.167407	0.836766	0.477249	0.72582	0.841062	0.95352	0.591708	-0.440849	-0.210305	-0.0777153	0.614409	0.943045	0.413511	0.69504	0.849037	0.950608	0.69522	-0.465652	-0.25994	-0.0633314	0.507215	0.944759
852845	OCH1	YGL038C	S000003006	Mannosyltransferase of the cis-Golgi apparatus; initiates the polymannose outer chain elongation of N-linked oligosaccharides of glycoproteins	1.11703e-09	1.52297e-08	0.00381075	0.719446	0.638323	0.404125	0.182877	1.41796	1.41069	0.381269	0.277493	0.261852	0.099959	0.643108	0.502161	0.273178	-0.0761436	0.395753	0.498403	0.754966	0.369493	-0.627274	-0.0994764	-0.124531	0.456779	0.194298	0.0618782	0.481963	0.827988	0.765268	0.116028	-0.568351	-0.40071	0.282063	0.596125	0.22979	0.0130893	0.466176	0.734021	0.786828	0.213234	-0.608885	-0.30303	0.141643	0.564549
852531	OM14	YBR230C	S000000434	Mitochondrial outer membrane receptor for cytosolic ribosomes; integral protein of the outer membrane that interacts with the nascent chain-associated complex (NAC) bound to ribosomes, contributing to co-translational mitochondrial import; interacts with porin (Por1p) and Om45p; abundance is decreased in cells grown in glucose relative to other carbon sources	1.4766e-14	3.59489e-11	3.67266e-08	0.0655101	0.0805661	0.812127	0.697573	2.50156	2.36763	0.043984	0.0763982	0.624482	0.469657	1.18779	0.78144	-0.0654139	0.263907	0.536636	0.692987	0.927422	-0.399232	-0.386155	-0.156594	-0.0508549	0.609344	0.288004	0.60665	0.756749	0.950068	0.786527	-0.479354	-0.247926	-0.186466	0.415224	0.88573	0.189669	0.522933	0.716048	0.904888	0.857801	-0.471794	-0.299217	-0.183923	0.286802	0.83233
854670	OM45	YIL136W	S000001398	Mitochondrial outer membrane protein of unknown function; major constituent of the outer membrane, extending into the intermembrane space; interacts with porin (Por1p) and with Om14p; imported via the presequence pathway involving the TOM and TIM23 complexes, then assembled in the outer membrane by Mim1p; protein abundance increases in response to DNA replication stress	1.89893e-12	1.13175e-10	2.00226e-07	0.513007	0.0535014	0.559674	0.482293	2.21841	2.37389	0.388293	0.0433403	0.533026	0.417939	1.39646	0.916405	0.0268728	-0.0272399	0.282578	0.489745	0.932163	0.0613289	-0.413575	-0.240366	-0.312679	0.419673	0.203173	0.428422	0.655292	0.930712	0.861023	-0.338744	-0.33725	-0.298101	0.316245	0.799233	0.161999	0.316705	0.580623	0.850889	0.929331	-0.238605	-0.378384	-0.297311	0.146969	0.730423
853536	OPI3	YJR073C	S000003834	Methylene-fatty-acyl-phospholipid synthase; catalyzes the last two steps in phosphatidylcholine biosynthesis; also known as phospholipid methyltransferase	1e-16	8.88178e-16	1e-16	-0.178454	0.0415053	0.107834	0.109287	6.78622	3.733	-0.125951	0.0720952	0.204488	0.178441	1.70052	0.50145	0.09398	0.30939	0.524998	0.789498	0.957315	-0.297371	-0.313008	-0.294286	0.0413301	0.686437	0.235382	0.452561	0.68035	0.981701	0.754925	-0.337068	-0.340337	-0.328979	0.48684	0.811183	0.187255	0.409553	0.638739	0.933957	0.85297	-0.330794	-0.33891	-0.324415	0.328403	0.784843
851064	ORM2	YLR350W	S000004342	Protein that mediates sphingolipid homeostasis; evolutionarily conserved, required for resistance to agents that induce unfolded protein response; Orm1p and Orm2p together control membrane biogenesis by coordinating lipid homeostasis with protein quality control; protein abundance increases in response to DNA replication stress; ORM2 has a paralog, ORM1, that arose from the whole genome duplicati…	2.38487e-12	7.77156e-16	1.87507e-11	0.465666	0.450698	0.981782	1.30623	4.1057	3.31833	0.278995	0.23585	0.560551	0.665254	1.51904	1.1685	0.275931	-0.158438	0.237904	0.391764	0.734136	0.476341	-0.519592	-0.176364	-0.23859	0.35447	0.433691	0.604522	0.802908	0.982556	0.571854	-0.330975	-0.312548	-0.165631	0.670992	0.89257	0.447261	0.55024	0.791243	0.981844	0.639659	-0.248744	-0.365559	-0.180382	0.602287	0.891733
853510	OSM1	YJR051W	S000003812	Fumarate reductase, catalyzes the reduction of fumarate to succinate; required for the reoxidation of intracellular NADH under anaerobic conditions; mutations cause osmotic sensitivity; has two translation start sites, one at the annotated start codon which produces an ER-targeted form required for anaerobic growth, and one at codon 32 which produces a mitochondrially-targeted form; OSM1 has a pa…	5.39456e-08	0.521908	0.000615132	-0.672562	0.161006	0.781665	0.217795	0.614932	-0.658906	-0.198275	0.06016	0.260978	0.0713611	0.177966	-0.176549	-0.4062	0.102978	0.419336	0.605905	0.718661	-0.536458	-0.43234	-0.203817	0.0477546	0.386624	0.123311	0.705721	0.634718	0.813514	0.391529	-0.769363	0.0411115	-0.177459	0.637494	0.717522	-0.226654	0.374082	0.561361	0.76661	0.66294	-0.699834	-0.279964	-0.216549	0.306754	0.574416
856460	PAN5	YHR063C	S000001105	2-dehydropantoate 2-reductase; part of the pantothenic acid pathway, structurally homologous to E. coli panE	2.81872e-07	4.98131e-06	0.00347843	0.184964	0.399215	0.446556	0.453512	1.552	0.268663	0.0798999	0.210196	0.23423	0.210186	0.607752	0.100371	-0.284181	0.150635	0.505546	0.615888	0.803283	-0.474721	-0.487722	-0.100782	-0.0242398	0.472867	0.0820905	0.438672	0.744942	0.910649	0.36927	-0.472791	-0.444563	-0.152445	0.78262	0.68904	-0.0824152	0.353264	0.71865	0.877503	0.619021	-0.529263	-0.517322	-0.145793	0.490942	0.66722
851381	PAR32	YDL173W	S000002332	Protein of unknown function; hyperphosphorylated upon rapamycin treatment in a Tap42p-dependent manner; green fluorescent protein (GFP)-fusion protein localizes to the cytoplasm; PAR32 is not an essential gene	6.39515e-10	1.20723e-11	7.76565e-08	0.0909446	0.436814	0.738247	0.89831	2.91834	1.6573	0.0411738	0.209713	0.352877	0.379322	0.986486	0.55521	-0.204923	0.123495	0.539841	0.608131	0.835733	-0.361133	-0.568063	-0.0449589	-0.0665013	0.497651	0.391282	0.619901	0.821337	0.957477	0.453515	-0.392838	-0.31782	-0.109184	0.757609	0.86021	0.292227	0.566715	0.83796	0.971949	0.587156	-0.424617	-0.407397	-0.105188	0.642273	0.861938
855717	PBI2	YNL015W	S000004960	Cytosolic inhibitor of vacuolar proteinase B (PRB1); required for efficient vacuole inheritance; with thioredoxin forms protein complex LMA1, which assists in priming SNARE molecules and promotes vacuole fusion; protein abundance increases in response to DNA replication stress	1e-16	4.88498e-15	1.13541e-10	0.949473	0.368961	0.536808	1.15669	2.87814	3.93277	0.866235	0.356638	0.602027	0.714535	1.15258	0.837361	0.313206	0.453328	0.689454	0.810425	0.945644	-0.260214	-0.35158	-0.100116	0.0794714	0.825384	0.280013	0.499105	0.746528	0.897664	0.88279	-0.351311	-0.370248	-0.133893	0.252675	0.85785	0.292603	0.485488	0.730076	0.871487	0.908123	-0.321496	-0.365401	-0.122854	0.19423	0.850325
854739	PCI8	YIL071C	S000001333	Possible shared subunit of Cop9 signalosome (CSN) and eIF3; binds eIF3b subunit Prt1p, has possible dual functions in transcriptional and translational control, contains a PCI (Proteasome-COP9 signalosome (CSN)-eIF3) domain	8.38144e-10	5.01942e-09	1.58304e-06	-0.107059	0.854381	0.741577	0.0201653	2.37954	1.25137	-0.0484777	0.41104	0.351041	0.00919852	0.838833	0.395938	-0.130647	0.306322	0.600282	0.602449	0.854107	-0.518117	-0.417893	0.0433185	-0.0920632	0.584461	0.389833	0.500467	0.657549	0.990835	0.583841	-0.243213	-0.249149	-0.371123	0.669477	0.816622	0.253211	0.495701	0.722489	0.979954	0.757084	-0.373806	-0.342303	-0.270234	0.482471	0.839307
852523	PCS60	YBR222C	S000000426	Oxalyl-CoA synthetase; capable of catalyzing conversion of oxalate to oxalyl-CoA; catalyzes first step in pathway of oxalate degradation that functions to protect yeast from inhibitory effects of oxalate; peroxisomal protein that binds mRNA; localizes to both peroxisomal peripheral membrane and matrix, expression is highly inducible by oleic acid; similar to E. coli long chain acyl-CoA synthetase	9.10657e-07	1.85155e-10	0.0098829	0.712363	0.67425	0.874264	0.570274	1.61881	1.55121	0.388483	0.404705	0.583926	0.375201	0.86503	0.671794	-0.313028	-0.215509	0.216556	0.464845	0.804833	-0.0404279	-0.56314	-0.297448	-0.216845	0.239545	0.0682716	0.264095	0.520301	0.921123	0.800814	-0.265785	-0.364001	-0.467082	0.364325	0.66913	-0.0582037	0.115682	0.447444	0.820033	0.850134	-0.204532	-0.453981	-0.43696	0.187135	0.562093
852644	PDE1	YGL248W	S000003217	Low-affinity cyclic AMP phosphodiesterase; controls glucose and intracellular acidification-induced cAMP signaling, target of the cAMP-protein kinase A (PKA) pathway; glucose induces transcription and inhibits translation	5.7323e-10	2.49468e-09	0.000505914	0.374751	0.488869	0.817893	0.398781	1.80654	1.29985	0.185958	0.275154	0.48182	0.212341	0.792125	0.449231	-0.109376	0.126569	0.50762	0.609525	0.904501	-0.269474	-0.520945	-0.0899512	-0.133506	0.525308	0.210734	0.459094	0.681287	0.971452	0.778032	-0.369978	-0.33333	-0.314758	0.450768	0.810095	0.0974115	0.355508	0.653166	0.886466	0.873481	-0.352275	-0.426628	-0.244986	0.247819	0.745911
855949	PEP4	YPL154C	S000006075	Vacuolar aspartyl protease (proteinase A); required for posttranslational precursor maturation of vacuolar proteinases; important for protein turnover after oxidative damage; plays a protective role in acetic acid induced apoptosis; synthesized as a zymogen, self-activates	1e-16	1e-16	1e-16	0.7861	0.568106	1.1542	1.4907	7.73587	4.41824	0.373942	0.398929	0.753619	0.740764	1.79092	0.668945	0.113302	0.333644	0.561534	0.762193	0.968315	-0.308727	-0.331347	-0.21073	-0.00420828	0.702908	0.273025	0.529325	0.753689	0.99116	0.685029	-0.396524	-0.341631	-0.242549	0.5687	0.849415	0.229008	0.483948	0.719394	0.95438	0.81441	-0.383144	-0.353018	-0.242038	0.392796	0.835326
851244	PEX22	YAL055W	S000000051	Putative peroxisomal membrane protein; required for import of peroxisomal proteins; functionally complements a Pichia pastoris pex22 mutation	4.06186e-12	6.42961e-05	0.00712313	0.496031	-0.0108965	0.328215	0.194881	1.402	0.431499	0.242536	-0.00568739	0.178884	0.103115	0.576966	0.128492	0.185298	0.264033	0.488545	0.702866	0.987865	-0.14868	-0.321474	-0.233611	-0.0988023	0.665926	0.144087	0.408804	0.642106	0.948987	0.807779	-0.373014	-0.344375	-0.338909	0.392605	0.770489	0.168895	0.355356	0.593092	0.867478	0.922749	-0.280599	-0.346223	-0.301566	0.174534	0.74939
855895	PGC1	YPL206C	S000006127	Phosphatidylglycerol phospholipase C; regulates phosphatidylglycerol (PG) accumulation via a phospholipase C-type degradation mechanism; PG levels affect mitochondrial function; contains glycerophosphodiester phosphodiesterase motifs	1.38778e-14	4.16207e-09	6.65237e-07	0.0871883	-0.0745235	0.465501	0.72843	2.35117	1.43987	0.0500552	-0.0440946	0.255717	0.335918	0.836565	0.413892	0.292848	0.459804	0.68624	0.796426	0.951436	-0.288763	-0.339076	-0.0867199	0.0559722	0.819188	0.396355	0.667856	0.847995	0.961449	0.680021	-0.448424	-0.292926	-0.0784422	0.536127	0.932883	0.37386	0.618344	0.820464	0.936573	0.796342	-0.408291	-0.318617	-0.0839141	0.38834	0.924764
855131	PGM2	YMR105C	S000004711	Phosphoglucomutase; catalyzes the conversion from glucose-1-phosphate to glucose-6-phosphate, which is a key step in hexose metabolism; functions as the acceptor for a Glc-phosphotransferase; protein abundance increases in response to DNA replication stress; PGM2 has a paralog, PGM1, that arose from the whole genome duplication	2.22045e-16	3.30468e-11	6.36845e-10	0.26976	0.0430643	0.293229	0.424373	2.45892	3.16635	0.514496	0.068478	0.392839	0.515314	1.79811	1.13121	0.367727	0.446568	0.542681	0.677485	0.98322	-0.197142	-0.163213	-0.128876	-0.126262	0.76395	0.345067	0.539785	0.704994	0.919922	0.876126	-0.337713	-0.263068	-0.217771	0.287493	0.875805	0.357787	0.524109	0.673304	0.8701	0.922124	-0.305165	-0.240381	-0.197266	0.178475	0.861261
854070	PHM7	YOL084W	S000005444	Protein of unknown function; expression is regulated by phosphate levels; green fluorescent protein (GFP)-fusion protein localizes to the cell periphery and vacuole; protein abundance increases in response to DNA replication stress	1.11022e-15	1.35225e-13	1.15463e-14	-0.0521146	0.0110973	0.307754	-0.0263737	4.21221	4.19985	-0.0506959	0.016673	0.577303	-0.039342	2.63103	1.88206	-0.560868	-0.321819	0.127473	0.230625	0.630866	-0.153796	-0.578095	-0.120696	-0.339147	0.0274232	0.230622	0.449245	0.680501	0.990733	0.707215	-0.337633	-0.344733	-0.3402	0.545974	0.801355	0.12678	0.368533	0.65524	0.961058	0.759574	-0.339382	-0.412934	-0.336557	0.45608	0.752255
856277	PIN3	YPR154W	S000006358	Negative regulator of actin nucleation-promoting factor activity; interacts with Las17p, a homolog of human Wiskott-Aldrich Syndrome protein (WASP), via an N-terminal SH3 domain, and along with LSB1 cooperatively inhibits the nucleation of actin filaments; short-lived protein whose levels increase in response to thermal stress; induces the formation of the [PIN+] and [RNQ+] prions when overproduc…	4.00694e-08	1.49006e-09	2.20971e-06	0.260427	0.613625	0.4587	0.34847	2.54626	1.27017	0.198533	0.440943	0.33977	0.235903	1.22767	0.646272	0.292018	0.554966	0.80923	0.713649	0.874729	-0.409964	-0.383713	0.182992	0.0279744	0.841694	0.394307	0.501251	0.705793	0.946161	0.363314	-0.239731	-0.312883	-0.249888	0.833495	0.771485	0.405231	0.549445	0.778844	0.974788	0.486462	-0.289768	-0.34993	-0.188091	0.746557	0.843334
856229	PIS1	YPR113W	S000006317	Phosphatidylinositol synthase; required for biosynthesis of phosphatidylinositol, which is a precursor for polyphosphoinositides, sphingolipids, and glycolipid anchors for some of the plasma membrane proteins	3.2582e-10	1.21369e-08	0.00880905	0.0075391	0.64481	0.785643	0.827432	1.25635	1.28013	0.00168991	0.169897	0.195403	0.208295	0.280456	0.251978	-0.476373	0.0250674	0.254093	0.568594	0.689427	-0.508081	-0.309194	-0.378319	0.0297932	0.284749	0.108211	0.47879	0.640544	0.903047	0.839515	-0.497416	-0.253753	-0.282893	0.302759	0.775766	-0.15757	0.292184	0.493206	0.792914	0.811738	-0.527157	-0.292119	-0.34126	0.191228	0.586662
855020	PLB1	YMR008C	S000004610	Phospholipase B (lysophospholipase) involved in lipid metabolism; required for efficient acyl chain remodeling of newly synthesized phosphatidylethanolamine-derived phosphatidylcholine; required for deacylation of phosphatidylcholine and phosphatidylethanolamine but not phosphatidylinositol; PLB1 has a paralog, PLB3, that arose from the whole genome duplication	1.11022e-16	3.4972e-14	1.28786e-14	-0.17886	0.221329	0.365543	0.498071	5.59217	2.71059	-0.221209	0.291835	0.406757	0.454467	2.21617	1.14102	0.172065	0.505901	0.71577	0.820221	0.909066	-0.467855	-0.320386	-0.0772006	0.12844	0.811523	0.366006	0.558731	0.740028	0.956161	0.392872	-0.340739	-0.286106	-0.216607	0.816586	0.800409	0.352291	0.576489	0.770821	0.979307	0.493387	-0.376916	-0.304957	-0.204572	0.74535	0.839656
852846	PNC1	YGL037C	S000003005	Nicotinamidase that converts nicotinamide to nicotinic acid; part of the NAD(+) salvage pathway; required for life span extension by calorie restriction; lacks a peroxisomal targeting signal but is imported into peroxisomes via binding to Gpd1p; PNC1 expression responds to all known stimuli that extend replicative life span; protein increases in abundance and relative distribution to cytoplasmic …	1e-16	5.55111e-16	6.55032e-15	0.211724	0.0441201	0.48987	0.719353	4.91134	4.39248	0.753456	0.139719	0.999828	0.853425	2.17087	1.05596	0.327828	0.484463	0.65484	0.79594	0.960251	-0.284975	-0.265758	-0.128232	0.046542	0.826224	0.361336	0.576095	0.763768	0.973135	0.768334	-0.367374	-0.295993	-0.206228	0.462596	0.897751	0.358535	0.560193	0.746444	0.939565	0.841158	-0.350059	-0.292865	-0.187007	0.347307	0.894303
854332	PNS1	YOR161C	S000005687	Protein of unknown function; has similarity to Torpedo californica tCTL1p, which is postulated to be a choline transporter, neither null mutation nor overexpression affects choline transport	1e-16	1.05149e-12	0.000327975	0.515861	0.951746	1.48738	0.967261	2.25807	1.68183	0.378603	0.577368	0.776449	0.54867	0.826246	0.383784	0.338926	0.477874	0.609675	0.814376	0.958601	-0.265542	-0.213498	-0.212147	0.0715121	0.818333	0.473977	0.612962	0.666507	0.909148	0.843074	-0.301365	-0.11887	-0.255779	0.306917	0.902679	0.419221	0.559624	0.648285	0.876674	0.902801	-0.288654	-0.161891	-0.239148	0.206114	0.874743
851421	PPH21	YDL134C	S000002292	Catalytic subunit of protein phosphatase 2A (PP2A); functionally redundant with Pph22p; methylated at C terminus; forms alternate complexes with several regulatory subunits; involved in signal transduction and regulation of mitosis; forms nuclear foci upon DNA replication stress; PPH21 has a paralog, PPH22, that arose from the whole genome duplication	2.23784e-09	1.22812e-08	8.3696e-05	-0.060069	0.579728	0.656107	0.551547	1.95589	1.20723	-0.0279487	0.307696	0.331998	0.266729	0.743751	0.408274	-0.243818	0.19731	0.476769	0.662248	0.840078	-0.493399	-0.390073	-0.198032	-0.00239317	0.506959	0.350675	0.576972	0.756431	0.995154	0.640905	-0.379143	-0.285041	-0.243923	0.617877	0.871789	0.162676	0.486754	0.717996	0.957408	0.768005	-0.453025	-0.347591	-0.247744	0.44303	0.811925
856608	PPX1	YHR201C	S000001244	Exopolyphosphatase; hydrolyzes inorganic polyphosphate (poly P) into Pi residues; located in the cytosol, plasma membrane, and mitochondrial matrix	9.61012e-09	7.51964e-05	0.00843123	-0.00676673	0.417282	0.406058	0.240816	1.37371	0.385905	-0.0026516	0.193173	0.178489	0.092395	0.464264	0.120718	-0.114837	0.380965	0.686698	0.669589	0.793244	-0.596724	-0.439415	0.0743306	0.0537276	0.639065	0.24559	0.580805	0.829036	0.961045	0.543259	-0.489077	-0.377602	-0.103368	0.672377	0.840449	0.0964708	0.529414	0.821659	0.894114	0.696899	-0.57319	-0.432711	-0.0286022	0.434075	0.806616
856649	PRB1	YEL060C	S000000786	Vacuolar proteinase B (yscB) with H3 N-terminal endopeptidase activity; serine protease of the subtilisin family; involved in protein degradation in the vacuole and required for full protein degradation during sporulation; activity inhibited by Pbi2p; protein abundance increases in response to DNA replication stress; PRB1 has a paralog, YSP3, that arose from the whole genome duplication	2.46581e-13	6.35048e-14	1.02829e-12	0.17488	0.160609	0.449441	0.743891	4.58739	2.65016	0.173998	0.229097	0.720134	1.03935	2.81456	1.48378	-0.531278	-0.358066	-0.0273391	0.288203	0.687702	-0.0783569	-0.416242	-0.401231	-0.32315	0.00684634	0.244957	0.482037	0.716351	0.972687	0.450744	-0.364777	-0.351351	-0.269277	0.779619	0.763082	0.137	0.394113	0.677124	0.978354	0.55375	-0.361518	-0.40994	-0.329074	0.683781	0.727812
853857	PRP40	YKL012W	S000001495	U1 snRNP protein involved in splicing; interacts with the branchpoint-binding protein during the formation of the second commitment complex	1.99886e-09	1.79251e-08	1.79006e-05	-0.22656	0.488579	1.0084	0.317504	1.77381	1.34081	-0.117869	0.240535	0.471526	0.141353	0.652397	0.455366	0.14943	0.445193	0.813321	0.770222	0.833121	-0.413699	-0.528055	0.116922	0.141141	0.788012	0.588019	0.713944	0.737623	0.940009	0.614854	-0.315057	-0.0865491	-0.199402	0.574173	0.934977	0.497127	0.682185	0.810107	0.953041	0.721512	-0.365776	-0.223969	-0.118639	0.484	0.954469
852215	PRX1	YBL064C	S000000160	Mitochondrial peroxiredoxin with thioredoxin peroxidase activity; has a role in reduction of hydroperoxides; reactivation requires Trr2p and glutathione; induced during respiratory growth and oxidative stress; phosphorylated; protein abundance increases in response to DNA replication stress	1e-16	2.5332e-12	1.57419e-12	-0.778378	-0.186743	0.605861	0.943868	3.24893	3.59144	-0.548362	-0.169952	0.480327	0.606566	1.16446	0.8273	-0.00235131	0.258401	0.535454	0.786067	0.926028	-0.329206	-0.391532	-0.275919	0.0682768	0.646628	0.35972	0.595582	0.768795	0.948931	0.811611	-0.393638	-0.278089	-0.168866	0.388702	0.907011	0.258608	0.507891	0.716964	0.922992	0.866536	-0.383829	-0.319472	-0.205595	0.300967	0.850393
850441	PTC6	YCR079W	S000002133	Mitochondrial type 2C protein phosphatase (PP2C); has similarity to mammalian PP1Ks; involved in mitophagy; null mutant is sensitive to rapamycin and has decreased phosphorylation of the Pda1 subunit of pyruvate dehydrogenase	3.32459e-08	5.07489e-07	0.00572534	0.0699532	0.360346	0.494211	0.464203	1.39982	1.13966	0.0489845	0.205399	0.30364	0.262349	0.628195	0.454336	0.497117	0.449441	0.71318	0.840936	0.86338	-0.071386	-0.388328	-0.106878	0.200329	0.86186	0.568527	0.61152	0.778084	0.951941	0.6763	-0.204992	-0.27039	-0.160212	0.527821	0.931	0.555347	0.570275	0.770466	0.932591	0.746974	-0.166001	-0.312342	-0.145955	0.43267	0.924589
850833	PUT1	YLR142W	S000004132	Proline oxidase; nuclear-encoded mitochondrial protein involved in utilization of proline as sole nitrogen source; PUT1 transcription is induced by Put3p in the presence of proline and the absence of a preferred nitrogen source	4.66888e-09	3.23712e-11	8.28449e-06	0.363067	0.292708	0.885987	1.0861	2.13816	1.80083	0.23249	0.26635	0.724102	0.749853	1.15354	0.872914	-0.511054	-0.0682692	0.345301	0.526862	0.643882	-0.424699	-0.549625	-0.203163	0.0225514	0.256663	0.208313	0.629441	0.826876	0.939239	0.616373	-0.587874	-0.313184	-0.0786834	0.571681	0.855042	0.0172913	0.480306	0.757118	0.89905	0.676464	-0.590253	-0.408236	-0.121438	0.460755	0.75379
853174	RAD2	YGR258C	S000003490	Single-stranded DNA endonuclease; cleaves single-stranded DNA during nucleotide excision repair to excise damaged DNA; subunit of Nucleotide Excision Repair Factor 3 (NEF3); homolog of human XPG protein	8.21445e-09	2.60077e-06	0.00805645	0.243457	0.174409	0.641366	0.286676	1.52916	0.51784	0.151743	0.153393	0.489181	0.19346	0.783777	0.240923	-0.149009	0.287205	0.626278	0.707597	0.824555	-0.512299	-0.476951	-0.054807	0.0704928	0.605363	0.118353	0.560589	0.720092	0.938484	0.499945	-0.590742	-0.257009	-0.220994	0.687153	0.759528	0.0144922	0.485269	0.731318	0.907541	0.671261	-0.59933	-0.367344	-0.166793	0.476698	0.748204
854395	RCN2	YOR220W	S000005746	Protein of unknown function; green fluorescent protein (GFP)-fusion protein localizes to the cytoplasm; phosphorylated in response to alpha factor; protein abundance increases in response to DNA replication stress	8.88178e-16	4.996e-15	3.55271e-15	0.0602074	0.0566868	0.381269	0.675419	5.8106	2.719	0.0862641	0.0866801	0.536981	0.798917	2.8228	1.55799	0.0584779	0.212005	0.483925	0.683799	0.974135	-0.20969	-0.381086	-0.215691	-0.10919	0.614279	0.329238	0.531307	0.716911	0.92995	0.312231	-0.342818	-0.28978	-0.214467	0.864072	0.753215	0.322785	0.530547	0.73212	0.954279	0.381495	-0.348309	-0.311148	-0.224836	0.825583	0.77788
851566	RCR2	YDR003W	S000002410	Vacuolar protein; presumably functions within the endosomal-vacuolar trafficking pathway, affecting events that determine whether plasma membrane proteins are degraded or routed to the plasma membrane; RCR2 has a paralog, RCR1, that arose from the whole genome duplication	9.99201e-16	1.86116e-09	9.95737e-12	-1.32688	-0.121344	0.665857	0.787262	3.18917	2.223	-0.42362	-0.0482831	0.257384	0.275623	0.807374	0.483185	-0.494018	-0.117804	0.25967	0.525211	0.698919	-0.345007	-0.497395	-0.315961	-0.0345741	0.233192	0.343897	0.609656	0.795027	0.984496	0.670433	-0.427263	-0.295481	-0.178659	0.574868	0.894133	0.0849544	0.423075	0.70028	0.940377	0.763057	-0.450198	-0.404371	-0.249969	0.426436	0.766421
851714	RGP1	YDR137W	S000002544	Subunit of a Golgi membrane exchange factor (Ric1p-Rgp1p); this complex catalyzes nucleotide exchange on Ypt6p	2.26995e-06	1.6514e-08	0.000587638	0.0750077	0.714708	0.872537	0.379647	1.85141	0.842896	0.0411075	0.355225	0.441827	0.176093	0.747775	0.334686	0.253318	0.447557	0.812718	0.621626	0.818323	-0.312802	-0.524257	0.304075	-0.0320221	0.766913	0.624832	0.642308	0.727687	0.903371	0.388325	-0.18763	-0.163832	-0.166389	0.754359	0.860782	0.584815	0.66496	0.857534	0.932558	0.588709	-0.256301	-0.309386	-0.0291013	0.590894	0.948101
855980	RNY1	YPL123C	S000006044	Vacuolar RNase of the T(2) family; relocalizes to the cytosol where it cleaves tRNAs upon oxidative or stationary phase stress; required for tRNA-specific translational pausing suring oxidative stress; promotes apoptosis under stress conditions and this function is independent of Rny1p catalytic activity	1e-16	1.86517e-14	5.9952e-15	0.956231	0.035625	0.683127	0.206005	7.91695	1.86359	0.838275	0.0267491	0.334304	0.0743718	1.37883	0.231357	0.425302	0.595166	0.729637	0.809873	0.920831	-0.32753	-0.226078	-0.0455077	0.103587	0.895194	0.379954	0.618124	0.78554	0.988222	0.611405	-0.401917	-0.272041	-0.1961	0.638608	0.889708	0.415817	0.635858	0.796857	0.957111	0.768378	-0.388487	-0.264792	-0.141565	0.442283	0.93141
855300	ROY1	YMR258C	S000004871	GTPase inhibitor with similarity to F-box proteins; inhibits Ypt52p GTPase activity by preventing Ypt52p from binding GTP; involved in regulating intracellular trafficking; physically interacts with Skp1p	1.7749e-10	7.32394e-07	0.00277579	0.0396427	0.304235	0.515858	0.496308	1.56414	0.810382	0.0274911	0.253731	0.366628	0.302565	0.773105	0.317711	0.09414	0.460842	0.675407	0.747511	0.919523	-0.488784	-0.32323	-0.039381	0.0260115	0.752475	0.370481	0.675743	0.834517	0.957997	0.69355	-0.484273	-0.264867	-0.0921596	0.518231	0.927467	0.27249	0.614875	0.802674	0.910097	0.813109	-0.505273	-0.299139	-0.0742909	0.338083	0.892828
854653	RRD1	YIL153W	S000001415	Peptidyl-prolyl cis/trans-isomerase; activator of the phosphotyrosyl phosphatase activity of PP2A; involved in G1 phase progression, microtubule dynamics, bud morphogenesis and DNA repair; required for rapid reduction of Sgs1p levels in response to rapamycin; subunit of the Tap42p-Sit4p-Rrd1p complex; protein increases in abundance and relative distribution to the nucleus increases upon DNA repli…	1.11207e-08	1.059e-07	0.00471995	0.340853	0.396516	0.482619	0.401611	1.4945	1.13003	0.223282	0.26336	0.29956	0.243676	0.703601	0.465686	0.314791	0.557226	0.705281	0.842679	0.925441	-0.390051	-0.241392	-0.11968	0.140474	0.863537	0.375616	0.594275	0.748862	0.989255	0.695454	-0.37609	-0.252998	-0.246616	0.555865	0.890066	0.364434	0.595862	0.751872	0.964242	0.786342	-0.389278	-0.25503	-0.210937	0.433338	0.901875
[truncated: 4,606 more rows]
[truncated: 16 more columns]

## Sheet: Pattern Graph
																											Supplementary Table 1. Complete table of genes analyzed by ANOVA in our RNA seq dataset.
			Average Veh						Average Myr						SD Veh						SD Myr							Pattern	Veh						Myr
[truncated: 61 more rows]

## Sheet: I Intersections
	-10	-9	-8	-7	-6	-5	-4	-3	-2	-1	0	1	2	3	4	5	6	7	8	9	10
[truncated: 21 more rows]

[truncated: 1 more sheets: Graph Reporter]
