# Supplementary material for: Reduced sphingolipid biosynthesis modulates proteostasis networks to enhance longevity
Source: Aging (Albany NY). 2023 Jan 14;15(2):472–91. doi: 10.18632/aging.204485 (PMC9925692; doi:10.18632/aging.204485)
Supplement: Supplementary Table 2 [file aging-15-204485-s002.xlsx]

## Sheet: Webgestalt patterns combined
Supplementary Table 2. Results for genes in the Interaction group of 1570 genes.
Pattern	GO ID	Ont	description	Tot	Sig	exp	Ratio	pValue	FDR	Sig Genes
D(↑)	GO:0006325	BP	chromatin organization	343	50	22.26	2.24618	2.11857e-08	6.99129e-06	BRE2;CDC7;CHD1;EAF1;ESC1;FUN19;HAT1;HFI1;HIR1;HIR3;HOS1;HOS2;HPA2;HPC2;ISW1;ITC1;LRS4;MEC1;MRN1;NAM7;NET1;NUP133;NUP170;NUP2;NUP84;PHO4;RSC2;RSC30;RSC58;RSC6;RSC8;RXT2;SET3;SFH1;SIR4;SNF6;SNT1;SPP1;SPT8;SUM1;SWC3;TAF1;TAF12;TAF5;TAF9;TRA1;TTI1;TTI2;TUP1;ULS1
D(↑)	GO:0044427	CC	chromosomal part	470	56	30.502	1.83594	3.03559e-06	0.000292375	BRE2;CDC13;CDC7;CEP3;CHD1;ESC1;GBP2;GCN4;HAT1;HIR1;HOS2;ISW1;ITC1;KAE1;LRS4;MLH1;MMS21;MMS4;MOT3;MPS1;NFI1;NSE5;NSL1;NUP133;NUP2;NUP84;PLC1;PSH1;PSO2;RAD18;RAD61;RAD9;RFC2;RFC3;RSC2;RSC30;RSC58;RSC6;RSC8;RXT2;SET3;SFH1;SIR4;SIZ1;SLD3;SMC4;SMC5;SNF12;SNF6;SNT1;SPP1;STB6;SWC3;THP1;TOP3;ULS1
D(↑)	GO:0051172	BP	negative regulation of nitrogen compound metabolic process	436	53	28.2955	1.87309	3.19647e-06	0.000292375	AHK1;BRE2;CAF40;CDC13;CDC7;CHD1;CKB1;ESC1;GAL11;GCN4;HAT1;HIR1;HIR3;HOS1;ISW1;ITC1;LRS4;MED11;MED2;MIG1;MMS21;MOT3;MSH3;NAM7;NET1;NUP133;NUP170;NUP2;NUP84;PGD1;PHO4;PRR2;PTC1;RAD9;REF2;RFX1;RGR1;RPL16B;RXT2;SEC14;SIR4;SIS2;SIZ1;SNT1;SPP1;SPT8;SRB8;SUM1;TEF2;TPK3;TUP1;ULS1;WHI3
D(↑)	GO:0140110	MF	transcription regulator activity	261	37	16.9384	2.18439	3.54394e-06	0.000292375	CEP3;CHA4;EDS1;FUN19;GAL11;GCN4;HFI1;HIR1;HIR3;HOT1;MED11;MED2;MED6;MIG1;MOT3;PDR3;PGD1;PHO4;RFX1;RGR1;RRN10;RSC30;SEF1;SNT1;SPT8;SRB8;SUM1;TAF1;TAF12;TAF3;TAF5;TAF8;TAF9;TFC6;TRA1;TUP1;UGA3
D(↑)	GO:0010629	BP	negative regulation of gene expression	431	52	27.971	1.85907	5.04246e-06	0.000332802	AIR2;BRE2;CAF40;CDC7;DBF20;DXO1;ECM32;ESC1;GAL11;GBP2;GCN4;HAT1;HIR1;HIR3;HOS1;ISW1;ITC1;LRS4;MED11;MED2;MIG1;MOT3;NAM7;NET1;NFI1;NRD1;NUP133;NUP170;NUP2;NUP84;PGD1;PHO4;PRR2;PUB1;REF2;RFX1;RGR1;RMD9;RPL16B;RXT2;SIR4;SKI8;SNT1;SPP1;SPT8;SRB8;SUM1;SWT1;THP1;TPK3;TUP1;WHI3
D(↑)	GO:0006357	BP	regulation of transcription by RNA polymerase II	453	53	29.3988	1.8028	1.01095e-05	0.000476592	CAF40;CDC7;CEP3;CHA4;CHD1;CTK2;CTK3;EDS1;ELA1;FUN19;GAL11;GAL3;GCN4;HFI1;HIR1;HOS1;HOS2;HOT1;ISW1;ITC1;KAE1;MED11;MED2;MED6;MIG1;MOT3;NUP133;NUP84;PDC2;PDR3;PGD1;PHO4;PRR2;RAD9;RFX1;RGR1;RSC30;RSC6;RTR2;RXT2;SEF1;SFH1;SNF12;SNF6;SNT1;SPT8;SRB8;SUM1;TAF1;TAF9;TRA1;TUP1;UGA3
T10a(↔)	GO:0005975	BP	carbohydrate metabolic process	271	35	13.4947	2.59361	1.06531e-07	3.51552e-05	AAP1;CDC19;CHS6;CTS2;CWH41;DAK2;ENO2;EXG2;GAL7;GAL80;GCR1;GPM1;GPM3;GUT1;IMA2;IMA5;KAR2;KEG1;LRG1;MAL11;MAL32;MDH1;PCM1;PFK2;PGI1;PGK1;PGU1;RBS1;SNF4;SOR1;SOR2;TAL1;TDH3;TPI1;YEA4
T10a(↔)	GO:0044432	CC	endoplasmic reticulum part	394	39	19.6196	1.98781	1.82367e-05	0.00300906	ALG11;ALG12;ALG13;ALG7;ARE1;CUE1;CWH41;DER1;DSC3;ERD1;ERJ5;ERV2;ERV46;EUG1;FPR2;GET1;GET3;HRI1;IRC22;KAR2;KEG1;LAG1;LHS1;MCD4;MNS1;NUS1;OST2;OST3;PMT3;RCE1;SCP160;SCS3;SCT1;SHE3;SSM4;STT3;USO1;VNX1;YEA4
T10a(↔)	GO:1901135	BP	carbohydrate derivative metabolic process	366	36	18.2253	1.97528	4.58955e-05	0.00504851	ALG11;ALG12;ALG13;ALG7;CAB5;CAT5;CDC1;CDC19;CHS6;COX13;CTS2;CWH41;ENO2;ERD1;GCR1;GPM1;GPM3;GUT1;KTR3;MCD4;MNS1;NRK1;NUS1;OST2;OST3;PCM1;PFK2;PGI1;PGK1;PMT3;SHH4;STT3;TAL1;TDH3;TPI1;YEA4
T10a(↔)	GO:0042175	CC	nuclear outer membrane-endoplasmic reticulum membrane network	383	36	19.0718	1.8876	0.000119347	0.00984616	ALG11;ALG12;ALG13;ALG7;ARE1;CUE1;CWH41;DER1;DSC3;ERD1;ERJ5;ERV2;ERV46;FPR2;GET1;HRI1;IRC22;KEG1;LAG1;MCD4;MNS1;NUS1;OST2;OST3;PMT3;RCE1;SCL1;SCP160;SCS3;SCT1;SHE3;SSM4;STT3;USO1;VNX1;YEA4
T10a(↔)	GO:0005794	CC	Golgi apparatus	282	28	14.0424	1.99395	0.000295781	0.016268	APL5;CDC50;CHS6;COG7;CPD1;DNF1;DNF3;ERV46;GET1;GET3;KTR3;LEM3;LST8;MCD4;NEL1;PCT1;PIK1;PRD1;PRM9;RUD3;SMF2;SNX3;SYS1;SYT1;TRS20;USO1;VTH1;YEA4
T10a(↔)	GO:0006457	BP	protein folding	111	15	5.52735	2.71378	0.000345456	0.0162858	CPR3;ERJ5;EUG1;GET3;HSC82;HSP10;HSP60;KAR2;LHS1;PHB1;PIM1;PLP2;RBL2;SIS1;SSA2
T10a(↔)	GO:0098796	CC	membrane protein complex	320	30	15.9347	1.88268	0.00048479	0.0199976	ALG13;ALG7;APL5;APS2;ATG14;COX13;CUE1;DER1;DSC3;EGO2;NEL1;OST2;OST3;PFK2;PMT3;POR2;SHH4;SRN2;SSM4;STT3;TOM20;TOM22;TOM5;VMA11;VMA16;VMA8;VPS16;VPS24;VPS28;YTA12
T10a(↔)	GO:0072524	BP	pyridine-containing compound metabolic process	94	13	4.68082	2.77729	0.000683726	0.02507	CDC19;ENO2;GCR1;GPM1;GPM3;NRK1;PFK2;PGI1;PGK1;TAL1;TDH3;TPI1;YEF1
T10a(↔)	GO:0098805	CC	whole membrane	455	38	22.6571	1.67718	0.000852278	0.0269869	APL5;APS2;ATG14;ATG16;ATG17;CDC50;DNF1;EGO2;ERS1;FAT3;GPM1;LST8;MCD4;MIM1;NEL1;NFT1;PEX2;PFK2;POR2;SMF2;SNX3;SRN2;SSA2;TOM20;TOM22;TOM5;UBP16;USO1;VMA11;VMA16;VMA8;VNX1;VPS16;VPS24;VPS28;VTH1;YHC3;YPK9
T01a(↔)	GO:0022613	BP	ribonucleoprotein complex biogenesis	494	50	25.3049	1.9759	1.14042e-06	0.000303981	BRR2;CBT1;CSL4;DIM1;DIP2;ECM2;JJJ1;KRR1;LAS1;LRP1;LSM7;LTV1;LUC7;MRD1;MRM1;NEW1;NOC3;NOP14;NOP53;NUP85;POP7;PRP11;PRP24;PUS9;RAI1;RAT1;RMP1;RNA1;RNH70;RPB8;RPC10;RPO26;RRP14;RRP15;RRP17;RSA1;RSA3;RTC6;SAS10;SDO1;SPP381;SPT5;SUI1;THP2;TIF11;TIF35;UTP14;UTP4;YAE1;YJU2
T01a(↔)	GO:0005730	CC	nucleolus	283	34	14.4965	2.34539	1.84231e-06	0.000303981	CSL4;DIM1;DIP2;EAF6;FHL1;FOB1;JJJ1;KRR1;LAS1;LSM7;MRD1;MUM2;NOC3;NOP14;NOP53;PAP2;POP7;RPB8;RPB9;RPC10;RPO26;RRN3;RRN6;RRP14;RRP15;RRP17;RRT14;RSA3;SAS10;SLZ1;TGS1;TRI1;UTP14;UTP4
T01a(↔)	GO:0034660	BP	ncRNA metabolic process	493	45	25.2537	1.78192	6.37295e-05	0.00701025	CBT1;CSL4;DIM1;DIP2;GCR2;JJJ1;KRR1;LAS1;LRP1;LSM7;MRD1;MRM1;MTO1;NOC3;NOP14;NOP53;PAP2;POP7;PUS9;PZF1;RAI1;RAT1;RMP1;RNH70;RPB8;RPC10;RPO26;RRN6;RRP14;RRP15;RRP17;SAS10;SEN15;SET2;SLM3;SPT5;TAD1;TAD3;TGS1;TRL1;TRM10;TYS1;UTP14;UTP4;WRS1
T01a(↔)	GO:0032259	BP	methylation	161	20	8.24714	2.42508	0.000176896	0.0145939	DIM1;DIP2;EFM2;EFM5;IRC15;KRR1;MRM1;MTO1;MUM2;NOP14;RKM4;RMT2;SAS10;SET1;SET2;SLZ1;TGS1;TRM10;UTP14;UTP4
T01a(↔)	GO:0140098	MF	catalytic activity, acting on RNA	245	25	12.55	1.99203	0.000641763	0.0370678	BRR2;DBP5;DIM1;MRM1;MSS116;NUC1;PAP2;POP7;PUS9;RAI1;RAT1;RNH70;RPB8;RPB9;RPC10;RPO26;SEN15;SLM3;SYF2;TGS1;TRL1;TRM10;TYS1;WRS1;YJU2
T01a(↔)	GO:0016071	BP	mRNA metabolic process	311	29	15.9308	1.82037	0.00104674	0.0431782	BRR2;BUD31;CBP1;CBT1;CSL4;CWC15;ECM2;LRP1;LSM7;LUC7;MGA2;MSL1;MSS116;MUM2;NMD2;PAP2;POP7;PRP11;PRP24;RAI1;RAT1;RMP1;RPB9;SLZ1;SMB1;SPP381;SPT5;SYF2;YJU2
T&D01a(↑)	GO:0000278	BP	mitotic cell cycle	388	29	8.2351	3.52151	7.68074e-10	1.26732e-07	ARP1;BUD3;CDC11;CDC14;CLB4;CTF3;DAM1;DDC1;DUN1;FKH1;HOS3;MBP1;MYO2;NUD1;PEA2;RAD24;SGS1;SHE1;SMC2;SPC97;SPC98;STU2;TEM1;TUB1;TUB2;TUB3;TUB4;VIK1;YCS4
T&D01a(↑)	GO:0048285	BP	organelle fission	283	24	6.00653	3.99565	2.54934e-09	2.80428e-07	ARP1;CDC14;CLB4;CTF3;DAM1;DDC1;MDM36;NUD1;NUM1;RAD17;RAD24;SGS1;SHE1;SIF2;SMC2;SPC97;SPC98;TEM1;TUB1;TUB2;TUB3;TUB4;VIK1;YCS4
T&D01a(↑)	GO:0007010	BP	cytoskeleton organization	273	21	5.79429	3.62426	1.66518e-07	1.09902e-05	ARP1;BBP1;CDC11;CDC14;CLB4;CTF13;DAM1;MYO2;NUD1;NUM1;PEA2;SHE1;SPC97;SPC98;STT4;STU2;TEM1;TUB1;TUB2;TUB3;TUB4
T&D01a(↑)	GO:0000003	BP	reproduction	474	28	10.0604	2.78319	2.93977e-07	1.61687e-05	BOI1;BUD3;CDC14;CTF3;DDC1;FKH1;MYO2;NKP2;NUD1;NUM1;OKP1;PEA2;QDR3;RAD17;RAD24;RRT12;SGS1;SIF2;SMC2;SPC97;SPC98;SPO23;SWI3;TUB1;TUB2;TUB3;TUB4;YCS4
T&D01a(↑)	GO:0016817	MF	hydrolase activity, acting on acid anhydrides	424	25	8.99918	2.77803	1.56901e-06	5.75302e-05	ARP1;ARP7;ATM1;ATP14;ATP16;ATP5;CDC11;HCS1;IOC2;MDL1;MYO2;RAD24;RFC5;RRM3;SGS1;SMC2;SNF5;SPP382;SRS2;SWI3;TEM1;TUB1;TUB2;TUB3;TUB4
T&D01a(↑)	GO:0044427	CC	chromosomal part	470	26	9.97551	2.60638	3.09711e-06	0.000102205	ARP7;CTF13;CTF3;DAM1;DDC1;GCN5;HCS1;HEK2;IOC2;MBP1;NKP2;OKP1;RAD17;RAD24;RFC5;RRM3;RTT109;SCS2;SGS1;SIF2;SMC2;SNF5;SPP382;STU2;SWI3;YCS4
T&D04a(↑)	GO:0098798	CC	mitochondrial protein complex	204	17	6.12	2.77778	0.000107965	0.0356283	AFG3;CBP3;CBS2;DSS1;IDH2;MAS2;MDM12;MRP20;MRP4;MRP49;MRPL3;MRPL33;RSM22;RSM25;RSM26;SWS2;TIM54
T&D04a(↑)	GO:0005759	CC	mitochondrial matrix	237	18	7.11	2.53165	0.000220156	0.0363257	ADH3;BOL1;CBP3;CBS2;COQ8;DSS1;IDH2;MAS2;MRP20;MRP4;MRP49;MRPL3;MRPL33;RSM22;RSM25;RSM26;SDH7;SWS2
T&D06a(↑)	GO:0044445	CC	cytosolic part	209	13	2.64449	4.91588	1.39065e-06	0.000458915	ASC1;RPL13B;RPL15A;RPL16A;RPL21A;RPL2A;RPL6A;RPL6B;RPP2A;RPS1B;RPS26A;RPS7B;RPS9B
T&D06a(↑)	GO:0005856	CC	cytoskeleton	255	12	3.22653	3.71917	6.39174e-05	0.00703091	AXL2;CLB3;CLN1;CSM1;DMA2;DSN1;GIC1;KIP3;PDS1;SLI15;SPC29;SPC34
T&D06a(↑)	GO:0044427	CC	chromosomal part	470	16	5.94694	2.69046	0.000167962	0.00958003	ASF2;BUB3;CSM1;CSM2;CSM3;DSN1;HIF1;MCD1;MEC3;PCC1;PIF1;PLM2;SLI15;SPC34;STN1;YOX1
T&D10a(↑)	GO:0016192	BP	vesicle-mediated transport	432	92	48.578	1.89386	1.694e-10	2.79511e-08	AGE2;ALY1;APL2;APL4;APL6;APM3;ATG18;AVL9;BCH2;BZZ1;COF1;COG1;COG3;COG4;COG5;COG6;COG8;COP1;COS1;COS12;DOP1;DRS2;EMP47;ERP6;ERV15;EXO70;EXO84;GCS1;GGA2;GOS1;GTS1;GYP1;INP51;INP52;KES1;MON1;MON2;MST28;MUK1;NPR1;OSH2;OSH3;PAN1;PEP3;PEP5;RAV1;RET2;RIC1;SAR1;SEC13;SEC15;SEC16;SEC20;SEC21;SEC23;SEC24;SEC26;SEC27;SEC28;SEC31;SEC5;SEC6;SEC7;SEC8;SED4;SFB2;SFB3;SFH5;SFT2;SLM2;SLY1;SSO2;STP22;SVP26;SYN8;TI…
T&D10a(↑)	GO:0098805	CC	whole membrane	455	91	51.1643	1.77858	6.79302e-09	7.47232e-07	APL2;APL4;APL6;ATG1;ATG18;ATG2;ATG9;AVT3;AVT4;BPT1;COP1;DNM1;FMP52;GTR2;HMG2;IML1;MCP1;MDM34;MDV1;MON1;MON2;MST28;MTC5;NCA2;NCR1;NPR3;PAN1;PEP3;PEP5;PEX1;PEX14;PEX17;PEX27;PEX3;PEX32;PEX6;PEX8;PFK1;PHS1;PIB2;PSD2;RET2;RTC1;SAM35;SAM37;SAM50;SAR1;SEC13;SEC16;SEC21;SEC23;SEC24;SEC26;SEC27;SEC28;SEC31;SEH1;SFB2;SFB3;SMF3;STP22;STV1;SYN8;TCO89;TLG2;TOM40;TOM71;TOR1;TOR2;UGO1;VAC8;VAM6;VHC1;VMA1;VMA13…
T&D10a(↑)	GO:0005794	CC	Golgi apparatus	282	64	31.7106	2.01825	1.12453e-08	9.27733e-07	AGE2;APL2;APL4;APL6;APM3;ATG9;BCH2;COG1;COG3;COG4;COG5;COG6;COG8;COP1;DOP1;DRS2;EMP47;ERP6;GCS1;GGA2;GOS1;GYP1;GYP6;KES1;KTR1;LCB5;MON2;MST28;NPR1;PFA4;PSD2;RET2;RIC1;SAR1;SBE22;SEC13;SEC16;SEC21;SEC23;SEC24;SEC26;SEC27;SEC28;SEC31;SEC7;SED4;SFB2;SFB3;SFT2;SLY1;SPF1;STV1;SVP26;TLG2;TOR1;TRS120;TRS130;TRS85;TVP18;VPS38;VPS52;VPS53;VPS54;YPT31
T&D10a(↑)	GO:0031982	CC	vesicle	279	62	31.3733	1.9762	4.54233e-08	2.49828e-06	ALY1;APL2;APL4;APL6;APM3;ATG18;ATG9;BCH2;COP1;COS1;COS12;DOP1;EMP47;ERP6;ERV15;EXO70;EXO84;GCS1;GTR2;GYP6;MON1;MON2;MST28;MTC1;PAN1;PEP3;PEP5;PSD2;RET2;SAR1;SEC13;SEC16;SEC21;SEC23;SEC24;SEC26;SEC27;SEC28;SEC31;SEC7;SFB2;SFB3;SLY1;STP22;STV1;SVP26;SYN8;TLG2;TOR1;TRS120;TRS130;TRS85;VAB2;VPS1;VPS33;VPS38;VPS41;VPS52;VPS53;VPS54;YPT31;YPT35
T&D10a(↑)	GO:0098796	CC	membrane protein complex	320	67	35.9837	1.86196	1.45985e-07	6.88216e-06	APL2;APL4;APL6;APM3;ATG18;COP1;COX8;DFM1;EMC1;EMC2;GAB1;GOS1;GPI16;GTR2;MDJ2;MDM34;MGR2;MIC60;ORM1;PEP3;PEP5;PFK1;PMT6;PMT7;QCR9;RCF1;RET2;SAM35;SAM37;SAM50;SAR1;SEC13;SEC20;SEC21;SEC23;SEC24;SEC26;SEC27;SEC28;SEC31;SEC62;SFB2;SFB3;SHR5;SRP101;SSC1;SSH1;SSO2;STP22;STV1;SWP1;SYN8;TLG2;TOM40;USA1;VAM6;VMA1;VMA13;VMA2;VMA4;VMA5;VMA6;VPH1;VPS33;VPS38;VPS41;YOS9
T&D10a(↑)	GO:0061919	BP	process utilizing autophagic mechanism	194	42	21.8151	1.92527	1.53309e-05	0.000562132	ATG1;ATG13;ATG18;ATG2;ATG9;COG1;COG3;COG4;COG5;COG6;COG8;DCK1;DNM1;GTR2;IML1;KES1;MAK10;MON1;NPR3;OSH2;OSH3;PHO85;PKC1;RIM15;RPD3;RTG3;SEC16;SEC23;SEC24;SEC7;TLG2;TOR1;TOR2;TRS130;TRS85;VAC8;VAM6;VPS33;VPS41;VPS52;XRN1;YPT31
T&D10a(↑)	GO:0006886	BP	intracellular protein transport	472	81	53.0759	1.52612	3.35165e-05	0.00110604	APL2;APL4;APL6;APM3;ATG13;BPH1;COG3;COP1;COS1;COS12;CSE1;DRS2;ECM10;ERP6;GGA2;GLE1;GYP1;GYP6;HPR1;KAP120;MAS1;MDJ2;MDY2;MGR2;MIC60;MON1;MON2;NUP116;NUP120;NUP159;NUP49;OCT1;PEP3;PEP5;PEX1;PEX14;PEX17;PEX3;PEX6;PEX8;PFA4;RIC1;SAC3;SAM35;SAM37;SAM50;SAR1;SEC16;SEC21;SEC23;SEC24;SEC26;SEC27;SEC31;SEC62;SEC8;SFB2;SFB3;SGF73;SHR5;SPT6;SRP1;SRP101;SRP72;SSC1;SSH1;SSO2;STI1;STP22;SYN8;TLG2;TOM40;TOM71;V…
T&D01b(↑)	GO:0022613	BP	ribonucleoprotein complex biogenesis	494	221	62.9094	3.51299	0	0	ACL4;AFG2;ARB1;ARX1;BCD1;BCP1;BFR2;BMS1;BMT2;BUD20;BUD21;BUD22;BUD23;BUD27;CBF5;CDC4;CDC40;CEF1;CIC1;CKA2;CLF1;CWC2;DBP10;DBP2;DBP3;DBP6;DBP7;DBP8;DBP9;DHR2;DIS3;DRS1;EBP2;ECM16;EMG1;ENP1;ENP2;ERB1;ESF1;ESF2;FAL1;FAP7;FCF1;FUN12;GAR1;GCD11;GEP3;GRC3;GSP1;HAS1;HCA4;HIT1;HPM1;HRR25;IMP3;IMP4;IPI1;IPI3;ISY1;JIP5;KIN28;KRE33;KRI1;LSG1;MAK11;MAK16;MAK21;MAK5;MDN1;MEX67;MOT1;MPP10;MPP6;MRH4;MTR3;MTR4;M…
T&D01b(↑)	GO:0034660	BP	ncRNA metabolic process	493	215	62.782	3.42455	0	0	AIR1;ALA1;BCD1;BFR2;BMS1;BMT2;BUD21;BUD22;BUD23;CBF5;CCA1;CDC4;CDC60;CIC1;CKA2;DBP10;DBP2;DBP3;DBP6;DBP7;DBP8;DBP9;DEG1;DHR2;DIS3;DOM34;DRS1;DUS1;DUS3;EBP2;ECM16;ELP2;ELP3;ELP6;EMG1;ENP1;ENP2;ERB1;ESF1;ESF2;FAL1;FAP7;FCF1;FUN12;GAR1;GCD10;GCD14;GEP3;GRC3;GSP1;HAS1;HCA4;HIT1;HRR25;IKI3;IMP3;IMP4;IPI1;IPI3;JHD2;KRE33;KRI1;KRS1;KTI11;LOS1;MAK11;MAK16;MAK5;MDN1;MES1;MOD5;MOT1;MPP10;MPP6;MSS1;MTR3;MTR…
T&D01b(↑)	GO:0005654	CC	nucleoplasm	365	111	46.4816	2.38804	0	0	ARX1;BMS1;BUD27;CDC6;CKA2;CTK1;DBP8;DCC1;DHR2;DPB11;ECM16;ELC1;ELP2;ELP3;ELP6;EMG1;EPL1;ERB1;ESA1;FCF1;FIP1;HDA1;HRR25;HST1;IKI3;IMP3;IMP4;IPI1;IPI3;JHD2;KIN28;MDN1;MED1;MEX67;MPP10;NAF1;NAN1;NCL1;NMD3;NOC2;NOC4;NOP2;NOP56;NOP58;NOP7;ORC4;PUS1;PUS7;PWP2;PXR1;RAD23;RAD3;RCL1;RCO1;RET1;RFM1;RIX1;RNA15;RNT1;ROK1;ROX3;RPB10;RPB2;RPB5;RPC19;RPC25;RPC40;RPC53;RPC82;RPO31;RRP3;RRP36;RRP43;RRP5;RRP7;RRP9…
T&D01b(↑)	GO:0005730	CC	nucleolus	283	161	36.0392	4.46736	0	0	AIR1;ARX1;BFR2;BMS1;BMT2;BUD21;BUD23;CAF4;CBF5;CDC4;CIC1;CKA2;CTK1;DBP10;DBP3;DBP6;DBP7;DBP8;DBP9;DHR2;DIS3;DRS1;EBP2;ECM16;EMG1;ENP1;ENP2;ERB1;ESF1;ESF2;EST2;FAL1;FCF1;FPR3;GAR1;GRC3;HAS1;HCA4;HRR25;HST1;IFH1;IMP3;IMP4;JIP5;KRE33;KRI1;MAK11;MAK16;MAK21;MAK5;MDN1;MOD5;MPP10;MTR3;MTR4;NAN1;NCL1;NHP2;NOC2;NOC4;NOG1;NOP12;NOP13;NOP15;NOP16;NOP2;NOP4;NOP56;NOP58;NOP6;NOP7;NOP8;NOP9;NPL3;NSA1;NSI1;NSR…
T&D01b(↑)	GO:0140098	MF	catalytic activity, acting on RNA	245	99	31.2	3.17308	0	0	ALA1;BMT2;BUD23;CCA1;CDC40;CDC60;CEF1;CLF1;CWC2;DBP10;DBP2;DBP3;DBP6;DBP7;DBP8;DBP9;DEG1;DHR2;DIS3;DOM34;DRS1;DUS1;DUS3;EBS1;ECM16;EMG1;FAL1;FCF1;GCD10;GCD14;HAS1;HCA4;ISY1;KRS1;MAK5;MES1;MOD5;MRH4;MTR4;NCL1;NGL2;NOP2;POP1;POP3;PPM2;PRP16;PRP19;PRP22;PRP43;PRP45;PRP8;PUS4;PUS6;PUS7;RCL1;RCM1;RET1;RIT1;RNH1;RNT1;ROK1;RPA12;RPA135;RPA14;RPA190;RPA34;RPA49;RPB10;RPB2;RPB5;RPC19;RPC25;RPC37;RPC40;RPC…
T&D01b(↑)	GO:0032259	BP	methylation	161	68	20.5029	3.31661	0	0	BMS1;BMT2;BUD23;BUR2;CKA2;DBP8;DHR2;DPH5;ECM16;EFM1;EFM3;EMG1;FCF1;FPR4;GCD10;GCD14;HMT1;HPM1;IMP3;IMP4;LGE1;MPP10;MSS1;NAN1;NCL1;NOC4;NOP2;NOP56;NOP58;PPM2;PWP2;RCL1;RCM1;RKM2;RKM3;ROK1;RRP3;RRP36;RRP5;RRP7;RRP9;SGV1;SOF1;SPB1;SWM2;TAE1;TRM12;TRM2;TRM3;TRM44;TRM5;TRM7;TRM732;TRM8;TRM82;TRM9;UBP8;UTP10;UTP13;UTP15;UTP18;UTP20;UTP21;UTP22;UTP25;UTP5;UTP6;UTP7
T&D10b(↑)	GO:0034660	BP	ncRNA metabolic process	493	24	5.93612	4.04304	5.04653e-10	1.66536e-07	BMT5;BMT6;BRX1;FAF1;LCP5;LHP1;NOB1;NOP1;NOP19;RPA43;RPC34;RPP1;RPS0B;RPS11A;RRP8;SLX9;SMM1;SNU13;SSB1;SSB2;TRM1;TRM11;TRM112;TRM13
T&D10b(↑)	GO:0022613	BP	ribonucleoprotein complex biogenesis	494	23	5.94816	3.86674	3.29884e-09	5.44309e-07	ALB1;BMT5;BMT6;BRX1;FAF1;LCP5;NOB1;NOG2;NOP1;NOP19;RLP24;RPA43;RPL11B;RPP1;RPS0B;RPS11A;RRP8;SLX9;SNU13;SSB1;SSB2;SYO1;TRM112
T&D10b(↑)	GO:0016741	MF	transferase activity, transferring one-carbon groups	100	9	1.20408	7.47458	2.30625e-06	0.000190266	BMT5;BMT6;EFM4;NOP1;RRP8;TRM1;TRM11;TRM112;TRM13
T&D10b(↑)	GO:0051169	BP	nuclear transport	179	9	2.15531	4.17574	0.000245676	0.00900813	KAP123;NOG2;RPS0B;RTP1;SLX9;SRP40;SSB1;SSB2;SYO1
I: 01b|01b(↑)	GO:0044283	BP	small molecule biosynthetic process	386	16	5.90816	2.70812	0.000181851	0.0360845	ALD4;ARG1;ARG3;ARG5,6;BAT1;CIT2;DLD3;GPP2;LEU1;LEU2;LEU4;SER3;SNO1;SNZ1;THI20;VID24
I: 01b|01b(↑)	GO:0006811	BP	ion transport	358	15	5.47959	2.73743	0.000266939	0.0360845	AQR1;BAP2;CCC1;CCC2;COT1;FRE4;MIR1;MPC2;NHA1;OAC1;PRM6;SFK1;SSY1;TNA1;YBT1
I: 01b|01b(↑)	GO:0055085	BP	transmembrane transport	425	16	6.5051	2.45961	0.000545279	0.0360845	AQR1;BAP2;CCC1;CCC2;COT1;MIR1;MPC2;NHA1;NRT1;OAC1;PEX13;PRM6;SSY1;THI7;TNA1;YBT1
I: 01b|01b(↑)	GO:0030312	CC	external encapsulating structure	124	8	1.89796	4.21505	0.000546735	0.0360845	AGA1;ANS1;LDS2;NCA3;PIR3;PST1;SPI1;UTH1
I: 01b|01b(↑)	GO:0006082	BP	organic acid metabolic process	433	16	6.62755	2.41416	0.000670545	0.03688	ALD4;ARG1;ARG3;ARG5,6;BAT1;CIT2;DLD3;GTF1;IZH2;LEU1;LEU2;LEU4;SER3;SNO1;SNZ1;YAT2
I: 05a|04a(↑)	GO:0055114	BP	oxidation-reduction process	421	35	19.0739	1.83497	0.00025432	0.02852	AIM17;ALD2;ALD3;ARA1;ARA2;ARI1;BDH2;BNA1;CIT1;COX15;COX5B;DOT5;EPS1;FMP46;FMS1;FRE8;GLC3;GLC8;GOR1;GPX1;GRE3;GRX1;GSY1;GUT2;HYR1;IGD1;OSM1;PAN5;PGM2;PRX1;PUT1;RSF1;SDH8;SGA1;ZTA1
I: 05a|04a(↑)	GO:0005773	CC	vacuole	262	25	11.8702	2.10611	0.000273403	0.02852	AGP2;AMS1;APE1;APE4;ATG15;ATG8;ATH1;BXI1;ECM38;ENB1;HSV2;MNR2;NYV1;PBI2;PEP4;PRB1;RCR2;RNY1;SGA1;SNA4;STE13;TFS1;TPO4;VMR1;VPS60
I: 05a|04a(↑)	GO:0051186	BP	cofactor metabolic process	266	25	12.0514	2.07444	0.000345697	0.02852	ALD2;ALD3;ARA2;BNA1;CIT1;COX15;ECM38;EMI2;FAA1;FMS1;GCG1;GLK1;GPM2;GTT1;GUT2;HXK1;ISA2;NNR1;NPT1;OSM1;PAN5;PNC1;RSP5;SDH6;THI6
I: 05a|04a(↑)	GO:0098805	CC	whole membrane	455	36	20.6143	1.74636	0.000540331	0.0334175	AGP2;AMS1;ATG15;ATG19;ATG34;ATG40;ATG8;BRO1;BXI1;ECM38;ENB1;FUN14;GPX1;GUT2;HSE1;HSV2;MDG1;MNR2;MSP1;NVJ1;NYV1;OM14;OM45;PCS60;PEX22;PIS1;RSP5;SLA2;SNA4;STE13;TFS1;TPO4;UIP4;VMR1;VPS27;VPS60
I: 05a|04a(↑)	GO:1901565	BP	organonitrogen compound catabolic process	390	32	17.6694	1.81104	0.00060759	0.0334175	ALD2;ALD3;APE1;ASI1;ATG15;ATG19;BNA1;BRO1;CIT1;COS5;COS7;ECM38;EPS1;FMS1;GAD1;GCG1;HRD1;HRT3;PDE1;PEP4;PRB1;PUT1;RSP5;SCM3;SRY1;UBC8;UBP5;UBX7;UGA1;VPS27;YPC1;YPS1
I: 05a|04a(↑)	GO:0016788	MF	hydrolase activity, acting on ester bonds	279	25	12.6404	1.97778	0.000710456	0.0334929	APP1;ATG15;BCY1;CLD1;CNB1;FBP26;GLO2;LDH1;LIH1;MUS81;NEM1;PDE1;PGC1;PLB1;PPH21;PTC6;RAD2;RNY1;SDP1;SIA1;SPO7;TGL2;TPS1;TPS2;TSL1
I: 05a|04a(↑)	GO:0016311	BP	dephosphorylation	149	16	6.75061	2.37016	0.00103483	0.0426866	APP1;CNB1;FBP26;GLC8;HAL5;NEM1;PPH21;PTC6;RRD1;SDP1;SIA1;SPO7;TPS1;TPS2;TSL1;VPS74
I: 10a|04a(↑)	GO:0016192	BP	vesicle-mediated transport	432	31	9.78612	3.16775	2.76757e-09	9.133e-07	APL1;ATG20;CSR2;EDE1;EMP46;ENT2;GGA1;GYP5;GYP7;KIN1;LDB17;OSH6;PEP1;PEP12;PKH1;PRM8;ROM2;RVS161;SCD5;SDS24;SNC1;SNX4;SSA1;TRS23;VPS17;VPS36;VPS5;VRP1;YAP1801;YET1;YPK1
I: 10a|04a(↑)	GO:1901565	BP	organonitrogen compound catabolic process	390	20	8.83469	2.2638	0.000389248	0.0312871	ADH5;APE2;BAR1;CAR2;CPS1;DDP1;FYV10;GGA1;GUD1;MCA1;NAS2;RMD5;SSA1;SSE2;UBP11;VID28;VID30;VPS36;YDC1;YPS6
I: 10a|10a(↑)	GO:0006508	BP	proteolysis	361	62	27.5539	2.25014	2.87247e-10	4.73957e-08	AFG1;ASI2;ASI3;CDC48;CDC53;COR1;COS6;COS8;CUE5;DDI1;DID4;DOA1;DUF1;DUG1;HRD3;KRE5;LAP2;MCX1;NAT3;PBN1;PHB2;PNG1;PRC1;PRE1;PRE10;PRE2;PRE3;PRE4;PRE6;PRE7;PRE8;PUP1;PUP2;QCR2;RIM11;RPN10;RPN11;RPN12;RPN2;RPN3;RPN6;RPN7;RPN9;RPT1;RPT2;RPT3;RPT4;RPT6;SAF1;SHP1;SNF7;SPC3;STE23;TUL1;UBC1;UBP15;UBP2;UBP6;UBX2;UBX5;VPS25;YPF1
I: 10a|10a(↑)	GO:1901565	BP	organonitrogen compound catabolic process	390	64	29.7673	2.15001	1.01819e-09	1.12e-07	AFG1;ARO80;ASI2;ASI3;BNA3;BNA5;BNA6;CDC48;CDC53;CHS5;COS6;COS8;CUE5;DDI1;DID4;DOA1;DUG1;HMF1;HRD3;KGD2;KRE5;LAP2;MCX1;NAT3;NTA1;PBN1;PNG1;PRC1;PRE1;PRE10;PRE2;PRE3;PRE4;PRE6;PRE7;PRE8;PUP1;PUP2;RPN10;RPN11;RPN12;RPN2;RPN3;RPN6;RPN7;RPN9;RPT1;RPT2;RPT3;RPT4;RPT6;SAF1;SHP1;SNF7;STE23;TUL1;UBC1;UBP15;UBP2;UBP6;UBX2;UBX5;VPS25;YPF1
I: 10a|10a(↑)	GO:0016192	BP	vesicle-mediated transport	432	68	32.9731	2.06229	1.76634e-09	1.45723e-07	ACT1;AKL1;APL3;APM1;APM2;APM4;ARC35;ART10;BCH1;BET4;CDC48;CHC1;CHS5;CLC1;COS6;COS8;COY1;DDI1;DID2;DID4;END3;ENT3;ERV29;ERV41;GDI1;GRH1;GVP36;LAS17;LSB5;MVP1;MYO3;MYO5;NEO1;OSH7;PDR17;PEP8;PIL1;ROD1;RVS167;SEC1;SEC10;SEC17;SLA1;SNF7;SNX41;SOP4;SRO77;SWA2;SYP1;TPM1;TVP15;TVP23;TVP38;UBX3;VPS13;VPS15;VPS25;VPS29;VPS30;VPS34;VPS35;VPS51;VPS55;VPS68;YAP1802;YET3;YIP5;YOP1
I: 10a|10a(↑)	GO:0098805	CC	whole membrane	455	69	34.7286	1.98684	6.72795e-09	4.44044e-07	ADY3;AIM3;APL3;APM1;APM2;APM4;ARC15;ATG21;ATG38;ATG39;AVT5;AVT6;AVT7;CBR1;CDC48;CDC55;CHC1;CLC1;CSH1;DID2;DID4;DOA1;DPP1;EIS1;END3;ENT3;FAB1;FIS1;FMP42;GEF1;GMC1;HFD1;IVY1;JSN1;MCR1;MDL2;MDM10;MIC27;MMM1;NEO1;NHX1;PER1;PEX12;PEX30;PPN1;PST2;PTM1;PXA1;PXA2;RAV2;RFS1;SDH2;SEC17;SLA1;SNF7;SNX41;TMN2;TOM70;VBA1;VOA1;VPS15;VPS25;VPS30;VPS34;VPS35;VPS51;VPS55;VPS68;YJU3
I: 10a|10a(↑)	GO:0098796	CC	membrane protein complex	320	53	24.4245	2.16995	2.52679e-08	1.38973e-06	APL3;APM1;APM2;APM4;ASI2;ASI3;ATG38;ATP1;ATP4;CDC48;CHC1;CLC1;COQ11;COR1;COX4;COX6;CYT1;DID2;DID4;EMC3;ENT3;FAB1;GEF1;GPI17;HRD3;MDM10;MIC27;MMM1;OST1;PAM17;PEP8;QCR2;RIP1;SDH1;SDH2;SDH3;SDH4;SEC17;SNF7;SPC3;TOM70;TUL1;UBX2;UBX3;VPS15;VPS25;VPS29;VPS30;VPS34;VPS35;VPS55;VPS68;WBP1
I: 10a|10a(↑)	GO:0043248	BP	proteasome assembly	35	14	2.67143	5.24064	9.44775e-08	3.8972e-06	ECM29;NAS6;PRE2;PRE4;RPN10;RPN11;RPN2;RPN6;RPN9;RPT1;RPT2;RPT3;RPT4;RPT6
I: 10a|10a(↑)	GO:0030029	BP	actin filament-based process	145	30	11.0673	2.71068	2.86691e-07	9.46081e-06	ACT1;AIM14;AIM3;AIM7;AIP1;AKL1;ARC15;ARC18;ARC19;ARC35;ARC40;ARP2;ARP3;BBC1;CAP2;END3;ENT3;GVP36;LAS17;LSB3;LSB5;MYO3;MYO5;NAT3;PPH22;SLA1;SRV2;SYP1;TPM1;VHS2
I: 5&6(↑)	GO:1901565	BP	organonitrogen compound catabolic process	390	131	63.1959	2.07292	0	0	ALD2;ALD3;APE1;ASI1;ATG15;ATG19;BNA1;BRO1;CIT1;COS5;COS7;ECM38;EPS1;FMS1;GAD1;GCG1;HRD1;HRT3;PDE1;PEP4;PRB1;PUT1;RSP5;SCM3;SRY1;UBC8;UBP5;UBX7;UGA1;VPS27;YPC1;YPS1;ADH5;APE2;BAR1;CAR2;CPS1;DDP1;FYV10;GGA1;GUD1;MCA1;NAS2;RMD5;SSA1;SSE2;UBP11;VID28;VID30;VPS36;YDC1;YPS6;AFG1;ARO80;ASI2;ASI3;BNA3;BNA5;BNA6;CDC48;CDC53;CHS5;COS6;COS8;CUE5;DDI1;DID4;DOA1;DUG1;HMF1;HRD3;KGD2;KRE5;LAP2;MCX1;NAT3;NTA1;PB…
I: 5&6(↑)	GO:0006508	BP	proteolysis	361	116	58.4967	1.98302	4.21885e-15	6.9611e-13	APE1;APE4;ASI1;ATG15;ATG19;BRO1;COS5;COS7;ECM38;EPS1;HRD1;HRT3;PBI2;PCI8;PEP4;PRB1;RSP5;SCM3;STE13;TFS1;UBC8;UBP5;UBX7;VPS27;YPS1;APE2;BAR1;CPS1;FYV10;GGA1;IMP2;MCA1;NAS2;RIM20;RMD5;SSA1;SSE2;UBP11;VID28;VID30;VPS36;YPS6;AFG1;ASI2;ASI3;CDC48;CDC53;COR1;COS6;COS8;CUE5;DDI1;DID4;DOA1;DUF1;DUG1;HRD3;KRE5;LAP2;MCX1;NAT3;PBN1;PHB2;PNG1;PRC1;PRE1;PRE10;PRE2;PRE3;PRE4;PRE6;PRE7;PRE8;PUP1;PUP2;QCR2;RIM11…
I: 5&6(↑)	GO:0016192	BP	vesicle-mediated transport	432	126	70.0016	1.79996	8.30891e-13	9.1398e-11	ATG8;BRO1;COS5;COS7;HSE1;NYV1;RCR2;RGP1;ROY1;RSP5;SLA2;USE1;VPS27;VPS60;VPS74;VPS8;YET2;YSC84;APL1;ATG20;CSR2;EDE1;EMP46;ENT2;GGA1;GYP5;GYP7;KIN1;LDB17;OSH6;PEP1;PEP12;PKH1;PRM8;ROM2;RVS161;SCD5;SDS24;SNC1;SNX4;SSA1;TRS23;VPS17;VPS36;VPS5;VRP1;YAP1801;YET1;YPK1;ACT1;AKL1;APL3;APM1;APM2;APM4;ARC35;ART10;BCH1;BET4;CDC48;CHC1;CHS5;CLC1;COS6;COS8;COY1;DDI1;DID2;DID4;END3;ENT3;ERV29;ERV41;GDI1;GRH1;GV…
I: 5&6(↑)	GO:0098805	CC	whole membrane	455	127	73.7286	1.72253	2.06639e-11	1.70477e-09	AGP2;AMS1;ATG15;ATG19;ATG34;ATG40;ATG8;BRO1;BXI1;ECM38;ENB1;FUN14;GPX1;GUT2;HSE1;HSV2;MDG1;MNR2;MSP1;NVJ1;NYV1;OM14;OM45;PCS60;PEX22;PIS1;RSP5;SLA2;SNA4;STE13;TFS1;TPO4;UIP4;VMR1;VPS27;VPS60;APL1;ATG20;ATG7;CPS1;MAM3;PEP1;PMC1;RVS161;SNC1;SNX4;SSA1;VPS36;VPS5;ADY3;AIM3;APL3;APM1;APM2;APM4;ARC15;ATG21;ATG38;ATG39;AVT5;AVT6;AVT7;CBR1;CDC48;CDC55;CHC1;CLC1;CSH1;DID2;DID4;DOA1;DPP1;EIS1;END3;ENT3;FAB…
I: 5&6(↑)	GO:0030029	BP	actin filament-based process	145	52	23.4959	2.21315	3.98578e-09	2.19218e-07	AIM21;APP1;LSB1;PIN3;PPH21;RSP5;SAC6;SCP1;SLA2;YSC84;ABP1;CAP1;ENT2;ROM2;RVS161;SCD5;SHE4;SSK1;TWF1;VRP1;ACT1;AIM14;AIM3;AIM7;AIP1;AKL1;ARC15;ARC18;ARC19;ARC35;ARC40;ARP2;ARP3;BBC1;CAP2;END3;ENT3;GVP36;LAS17;LSB3;LSB5;MYO3;MYO5;NAT3;PPH22;SLA1;SRV2;SYP1;TPM1;VHS2;ARF3;MLF3
I: 5&6(↑)	GO:0019637	BP	organophosphate metabolic process	426	113	69.0294	1.63698	8.71415e-09	4.1081e-07	ATG15;BNA1;CIT1;CLD1;COX5B;EMI2;FAA1;FBP26;GLK1;GPC1;GPM2;GUT2;HXK1;IPT1;NEM1;NNR1;NPT1;OPI3;OSM1;PDE1;PGC1;PGM2;PIS1;PLB1;PNC1;SPO7;THI6;URA8;VPS74;YFT2;ADH5;CHO2;CKI1;DDP1;ENO1;FAD1;GPD1;ISN1;NNR2;PFK26;PYK2;THI11;VHS3;XPT1;YPK1;ACP1;ARG82;ATP1;ATP4;AYR1;BNA5;BNA6;CDC48;COR1;COX4;COX6;CRD1;CSH1;CWH43;CYT1;DPP1;EPT1;ERG20;ERG9;FAB1;FMP30;GPI10;GPI12;GPI17;GPT2;GRS2;GSM1;GUP1;HXK2;INP54;IPK1;KGD2…
I: 5&6(↑)	GO:0055114	BP	oxidation-reduction process	421	111	68.2192	1.62711	1.74317e-08	6.39164e-07	AIM17;ALD2;ALD3;ARA1;ARA2;ARI1;BDH2;BNA1;CIT1;COX15;COX5B;DOT5;EPS1;FMP46;FMS1;FRE8;GLC3;GLC8;GOR1;GPX1;GRE3;GRX1;GSY1;GUT2;HYR1;IGD1;OSM1;PAN5;PGM2;PRX1;PUT1;RSF1;SDH8;SGA1;ZTA1;ADH5;ERG26;GPD1;HAP5;YPR1;ACP1;ADR1;AIM14;ATP1;AYR1;BMH1;BMH2;CBR1;COQ11;COQ5;COQ6;COR1;COX4;COX6;CYT1;DAK1;ECI1;ERG10;ERG24;ETR1;GIP2;GMC1;GRX5;HFD1;IFA38;IRC24;KGD1;KGD2;LOT6;LSC1;LSC2;MCR1;MDH3;MIA40;MPD2;MXR2;NDI1;OD…

## Sheet: INTERACTION group
DAVID analysis of the Interaction group of 1576 genes - 106 genes not included in table
Category	Term	Count	%	PValue	Genes	List Total	Pop Hits	Pop Total	Fold Enrichment	Bonferroni	Benjamini	FDR
GOTERM_CC_DIRECT	GO:0016020~membrane	627	39.9363	8.96302e-33	854170, 854052, 855142, 853085, 854174, 855020, 855261, 856350, 854057, 856597, 855023, 855029, 855147, 856357, 855389, 856599, 856229, 856480, 856241, 854183, 856367, 855036, 855156, 855277, 856001, 856008, 850811, 850812, 850938, 854070, 854071, 855284, 855041, 854072, 856492, 855047, 856135, 856013, 854077, 856496, 856018, 856137, 850941, 850821, 850942, 851917, 850829, 851918, 855050, 854081,…	1529	1807	6279	1.42493	4.21262e-30	4.21262e-30	3.87203e-30
KEGG_PATHWAY	sce01100:Metabolic pathways	314	20	1.62163e-27	855384, 855021, 855383, 856597, 854057, 851582, 853642, 856910, 855029, 855149, 854845, 852303, 852423, 856229, 855034, 856800, 856008, 852442, 853775, 852323, 851596, 854856, 852314, 851346, 853768, 852559, 852317, 850933, 854190, 851481, 852691, 851360, 856014, 854077, 853664, 856018, 853541, 854872, 856137, 853536, 852688, 856804, 852446, 852327, 855955, 850940, 851237, 852326, 850941, 851910,…	613	797	2412	1.5502	1.86487e-25	1.88109e-25	1.54055e-25
GOTERM_CC_DIRECT	GO:0005886~plasma membrane	227	14.4586	1.34406e-22	854170, 855020, 850490, 855023, 853884, 853522, 855149, 852796, 850376, 852309, 856480, 856241, 854183, 850385, 851597, 851596, 854856, 853768, 854857, 850811, 855827, 850812, 853528, 851904, 850938, 854070, 856492, 855047, 856013, 856496, 850394, 850396, 855048, 856924, 850389, 852689, 852326, 852329, 850821, 850942, 850829, 855050, 855293, 853671, 856389, 851010, 851131, 855854, 852343, 851132,…	1529	530	6279	1.75887	6.3171e-20	3.15855e-20	2.90318e-20
GOTERM_CC_DIRECT	GO:0005783~endoplasmic reticulum	258	16.4331	8.4395e-19	854170, 854052, 855020, 856597, 853884, 855029, 853761, 852796, 853882, 856599, 850376, 850489, 856229, 850369, 852429, 856480, 855036, 856366, 853892, 854065, 856008, 850385, 851597, 851467, 854856, 855703, 853768, 851224, 852317, 855949, 854070, 854871, 852330, 856013, 855044, 854995, 853302, 856018, 851487, 852576, 853536, 852324, 852329, 850821, 850942, 851917, 850829, 851918, 854081, 856140,…	1529	663	6279	1.59805	3.96657e-16	1.32219e-16	1.21529e-16
GOTERM_CC_DIRECT	GO:0071944~cell periphery	130	8.28025	2.37793e-16	852390, 855780, 854174, 855020, 850490, 854332, 855023, 855660, 853241, 853367, 854214, 855940, 851610, 852149, 854447, 852826, 852309, 852946, 855308, 851742, 854856, 853768, 851625, 852956, 851869, 850938, 852293, 856492, 855047, 856893, 856013, 851086, 853142, 856496, 850394, 850671, 856137, 853388, 853536, 850665, 852326, 852601, 853815, 852329, 855050, 856140, 855293, 853396, 851131, 856783,…	1529	278	6279	1.92036	1.04361e-13	2.79407e-14	2.56816e-14
GOTERM_CC_DIRECT	GO:0005739~mitochondrion	409	26.051	3.55985e-16	855142, 853085, 855261, 856350, 854057, 856597, 855265, 856475, 855268, 856229, 856480, 854064, 855272, 856365, 854187, 856001, 855284, 855047, 856135, 856014, 855045, 854077, 850940, 856009, 850823, 850949, 855054, 854083, 855051, 855176, 856027, 850953, 850833, 856432, 854494, 854253, 854495, 855227, 853169, 855348, 856314, 854256, 854257, 855587, 855472, 855593, 853170, 856321, 854022, 855231,…	1529	1216	6279	1.38125	1.56541e-13	3.34626e-14	3.07571e-14
GOTERM_MF_DIRECT	GO:0016491~oxidoreductase activity	134	8.53503	1.22166e-15	855021, 854695, 853482, 855385, 855029, 851069, 856506, 856626, 851974, 855811, 852546, 855932, 856504, 853639, 852825, 854980, 856365, 855034, 852442, 856800, 852323, 856765, 855797, 851596, 851354, 852314, 856638, 852951, 854854, 854855, 853923, 852716, 851481, 856014, 855441, 850790, 855447, 855205, 853664, 853940, 853541, 852179, 852446, 852688, 856804, 852720, 853776, 851238, 851237, 852064,…	1322	278	5045	1.83946	1.45206e-12	1.45255e-12	1.433e-12
GOTERM_CC_DIRECT	GO:0000324~fungal-type vacuole	129	8.21656	8.451e-15	854170, 854052, 854174, 855261, 855023, 855660, 854214, 850891, 856513, 853882, 855940, 855389, 853366, 851610, 852149, 855813, 852302, 854689, 856625, 850369, 852309, 853758, 852946, 854104, 856644, 853497, 850662, 853127, 851348, 853766, 851625, 855949, 855947, 854070, 853261, 855284, 850394, 852851, 853267, 856137, 850794, 854631, 851511, 856649, 852324, 853138, 856527, 851875, 852689, 852605,…	1529	286	6279	1.85228	3.96572e-12	6.61995e-13	6.08472e-13
GOTERM_BP_DIRECT	GO:0043161~proteasome-mediated ubiquitin-dependent protein catabolic process	46	2.92994	9.22046e-13	854431, 855166, 854995, 855567, 854710, 854795, 856731, 854433, 856830, 853168, 853712, 854328, 852468, 852402, 856704, 852467, 852822, 852624, 851557, 851930, 851259, 851757, 856607, 856909, 856862, 856223, 854882, 854544, 852222, 853456, 850562, 853036, 851431, 852003, 854735, 854119, 850554, 852239, 851842, 856218, 853667, 850611, 852834, 850613, 851408, 852939	1492	66	5678	2.65241	1.68549e-09	1.68458e-09	1.65692e-09
GOTERM_CC_DIRECT	GO:0030479~actin cortical patch	40	2.54777	4.94887e-12	854353, 855640, 856277, 855584, 852233, 850450, 853862, 852276, 852666, 851532, 854549, 850323, 853856, 850367, 851996, 852405, 851635, 850504, 854748, 856409, 854507, 855630, 856862, 851051, 855771, 850580, 855117, 855711, 853037, 853433, 855478, 855136, 854713, 854777, 852536, 853528, 851409, 853729, 854819, 851707	1529	58	6279	2.83214	2.32594e-09	3.32281e-10	3.05416e-10
KEGG_PATHWAY	sce01110:Biosynthesis of secondary metabolites	142	9.04459	2.62604e-11	854690, 852152, 856597, 854057, 856079, 851582, 855029, 855303, 855149, 851069, 853119, 856748, 852423, 850400, 856626, 856884, 855552, 852286, 854346, 852288, 852442, 856800, 854347, 856523, 851596, 851346, 852951, 851504, 852559, 852317, 851481, 856411, 855201, 852691, 851087, 855441, 850790, 855447, 855205, 854872, 856137, 855444, 853536, 853932, 856804, 850664, 851238, 851878, 851758, 851516,…	613	351	2412	1.59184	3.01994e-09	1.5231e-09	1.24737e-09
KEGG_PATHWAY	sce03050:Proteasome	29	1.84713	4.5882e-11	851140, 852471, 851461, 852037, 856731, 854433, 856830, 853168, 853712, 854328, 851557, 856607, 856223, 854882, 854544, 853456, 853036, 856742, 852003, 854735, 854119, 850554, 852239, 854810, 856218, 850611, 852834, 850613, 851408	613	36	2412	3.16966	5.27643e-09	1.7741e-09	1.45293e-09
GOTERM_CC_DIRECT	GO:0000502~proteasome complex	32	2.03822	1.25382e-10	851140, 852471, 856355, 851461, 852037, 851641, 856731, 854433, 856830, 853168, 853712, 854328, 851557, 856607, 856223, 854882, 854544, 853456, 850562, 853036, 856742, 852003, 854735, 854119, 850554, 852239, 856218, 850611, 852736, 852834, 850613, 851408	1529	44	6279	2.98662	5.89293e-08	7.36617e-09	6.77061e-09
GOTERM_CC_DIRECT	GO:0009277~fungal-type cell wall	59	3.75796	1.44312e-09	852390, 853282, 856671, 855780, 854174, 854011, 853367, 850891, 855940, 855389, 855813, 855659, 851259, 856625, 851537, 853916, 853693, 855352, 854421, 850662, 850730, 854857, 852359, 853766, 853326, 851625, 850811, 850812, 852370, 856893, 854797, 853268, 852851, 850992, 856137, 853465, 853102, 854631, 856729, 850309, 853199, 855255, 853232, 853196, 853395, 855018, 851056, 856546, 852389, 854564,…	1529	116	6279	2.0887	6.78264e-07	7.53627e-08	6.92696e-08
KEGG_PATHWAY	sce04144:Endocytosis	45	2.86624	5.10319e-09	854092, 856294, 851085, 852097, 854353, 853287, 853461, 852233, 853862, 853884, 853566, 851641, 854256, 854235, 852666, 854449, 851532, 853416, 853856, 851996, 851259, 854748, 851418, 855739, 850903, 854261, 853393, 856862, 851392, 856387, 855771, 852243, 856403, 856887, 853398, 856105, 851135, 852785, 853589, 854777, 852536, 850712, 853868, 853528, 853906	613	79	2412	2.24131	5.86867e-07	1.47992e-07	1.21201e-07
GOTERM_CC_DIRECT	GO:0005576~extracellular region	57	3.63057	6.37511e-09	852390, 853282, 856671, 855780, 854174, 855020, 852072, 855343, 855980, 854011, 853367, 853882, 855389, 853366, 855659, 851259, 853916, 853693, 855352, 854421, 851596, 850730, 854857, 852359, 853766, 851625, 850811, 850812, 854151, 852370, 856454, 855562, 856893, 854797, 850992, 853102, 851511, 853699, 856729, 852925, 855914, 853199, 855255, 853196, 855018, 856546, 854644, 855577, 854564, 852147,…	1529	114	6279	2.0533	2.9963e-06	2.9963e-07	2.75405e-07
GOTERM_BP_DIRECT	GO:0098869~cellular oxidant detoxification	21	1.33758	7.53827e-09	855492, 854980, 852064, 856399, 856014, 851551, 853951, 853940, 853058, 852124, 854856, 852215, 850322, 852302, 853776, 853842, 854855, 852546, 850799, 854805, 852979	1492	24	5678	3.32993	1.37799e-05	6.88621e-06	6.77314e-06
GOTERM_CC_DIRECT	GO:0005768~endosome	68	4.33121	1.48514e-08	856394, 852394, 853287, 852035, 852079, 853884, 853566, 852276, 851784, 854256, 850574, 855983, 850772, 854449, 855933, 854007, 855739, 853290, 856367, 856004, 851392, 853890, 856403, 854300, 856644, 853497, 853212, 850532, 851348, 853804, 850619, 856294, 852097, 855640, 853345, 851641, 851685, 854235, 853416, 853138, 850941, 852801, 852605, 850903, 854907, 853393, 856021, 856345, 856387, 852066,…	1529	148	6279	1.88682	6.98012e-06	6.34559e-07	5.83254e-07
GOTERM_BP_DIRECT	GO:0055085~transmembrane transport	108	6.87898	1.83319e-08	856350, 855261, 850490, 854332, 855023, 855660, 853241, 851610, 852149, 851697, 850489, 854447, 850369, 852309, 851616, 852429, 852946, 851738, 855793, 850781, 856644, 853497, 853801, 853647, 851862, 855669, 852956, 853926, 850938, 855284, 852293, 856492, 853540, 856013, 856496, 850394, 854237, 850671, 851995, 855956, 850665, 852601, 852689, 850821, 850829, 853671, 855453, 852066, 856783, 855451,…	1492	255	5678	1.6118	3.35101e-05	1.11641e-05	1.09808e-05
GOTERM_CC_DIRECT	GO:0000329~fungal-type vacuole membrane	90	5.73248	4.31419e-08	856350, 854094, 855261, 852394, 853287, 853042, 854494, 852230, 852593, 854412, 855623, 853884, 850296, 852596, 852793, 855863, 851663, 850574, 855983, 850772, 853679, 850685, 851697, 853039, 854447, 851259, 850369, 852108, 852429, 851815, 853290, 856088, 855113, 856004, 852200, 852485, 855237, 850782, 852685, 855308, 853801, 850411, 852998, 852635, 852878, 855905, 854936, 850736, 856050, 854030,…	1529	219	6279	1.68765	2.02765e-05	1.68972e-06	1.55311e-06
KEGG_PATHWAY	sce00500:Starch and sucrose metabolism	28	1.78344	4.31876e-08	855303, 854872, 851564, 856314, 856137, 856705, 853932, 852423, 850962, 853732, 852128, 852920, 850569, 854708, 855131, 853199, 856289, 852286, 853235, 853830, 854644, 853204, 851007, 854635, 851646, 850317, 852639, 850614	613	41	2412	2.68714	4.96656e-06	1.00195e-06	8.20564e-07
GOTERM_BP_DIRECT	GO:0034599~cellular response to oxidative stress	49	3.12102	5.45263e-08	850331, 853563, 852312, 850332, 856511, 850322, 850444, 856506, 852302, 852423, 850324, 851974, 856504, 852546, 854888, 850568, 854805, 854144, 854980, 856048, 851551, 856921, 856765, 852124, 850532, 850698, 853842, 854855, 855905, 852916, 856014, 853940, 853776, 854706, 851955, 850504, 850429, 855291, 854287, 852064, 852146, 852215, 850950, 852335, 853149, 856658, 852934, 850799, 853707	1492	91	5678	2.04919	9.96691e-05	2.49049e-05	2.44959e-05
GOTERM_BP_DIRECT	GO:0006629~lipid metabolic process	72	4.58599	8.47399e-08	855020, 856597, 855342, 854495, 854412, 853642, 855029, 853288, 852872, 850332, 851973, 856748, 850400, 852503, 856229, 850886, 851413, 853717, 852825, 854808, 855593, 853052, 855630, 855552, 856366, 854187, 856001, 853571, 856767, 854346, 856523, 852883, 852314, 851224, 852951, 852317, 851701, 854419, 851628, 853927, 854151, 855361, 853061, 855201, 855003, 851087, 855441, 852330, 851361, 855242,…	1492	155	5678	1.76778	0.000154893	3.0964e-05	3.04555e-05
GOTERM_CC_DIRECT	GO:0005789~endoplasmic reticulum membrane	139	8.8535	1.42982e-07	854052, 856597, 851064, 855029, 853247, 853761, 852796, 856599, 856357, 850376, 854328, 856748, 850400, 856229, 850369, 850767, 852826, 852825, 850769, 852429, 856480, 855036, 855552, 852044, 854346, 856767, 856008, 853800, 854856, 851224, 852951, 850411, 850654, 850777, 852317, 851626, 853927, 852290, 855201, 851087, 850790, 853142, 854995, 856535, 856018, 850671, 855566, 855324, 851487, 853536,…	1529	386	6279	1.4788	6.71993e-05	5.16935e-06	4.7514e-06
GOTERM_BP_DIRECT	GO:0006897~endocytosis	54	3.43949	5.32835e-07	854092, 854170, 854053, 855300, 854770, 854412, 852233, 852079, 853884, 852276, 854256, 853201, 852666, 850323, 850367, 852826, 854261, 856367, 851392, 852243, 855478, 855631, 856566, 851348, 851304, 851108, 852515, 853729, 855640, 850394, 853461, 850396, 851641, 851996, 853733, 850941, 850504, 856409, 854507, 850903, 856103, 856389, 853077, 851051, 852101, 853157, 854763, 855136, 853872, 851203,…	1492	110	5678	1.86822	0.000973549	0.000162248	0.000159584
GOTERM_CC_DIRECT	GO:0034515~proteasome storage granule	19	1.21019	6.52152e-07	851140, 854882, 851461, 854544, 853456, 852037, 853036, 856830, 856731, 853168, 854735, 854119, 854328, 850554, 856218, 850611, 852834, 850613, 851408	1529	25	6279	3.12102	0.000306465	2.18937e-05	2.01235e-05
GOTERM_CC_DIRECT	GO:0010008~endosome membrane	36	2.29299	7.04279e-07	856394, 856294, 852097, 852394, 855640, 852035, 853566, 852276, 854256, 850574, 854235, 850772, 855983, 853416, 853138, 854007, 850941, 855739, 856021, 856862, 856345, 856387, 852066, 853890, 856644, 856105, 855137, 851135, 853497, 854763, 851445, 853667, 853502, 850712, 853868, 853906	1529	67	6279	2.20653	0.000330956	2.20674e-05	2.02832e-05
GOTERM_CC_DIRECT	GO:0005743~mitochondrial inner membrane	92	5.85987	1.55777e-06	855142, 856395, 853085, 851380, 851063, 854057, 854695, 854651, 856432, 855348, 855623, 854930, 852235, 852994, 852312, 852477, 855858, 850685, 855857, 852546, 851413, 853639, 853716, 854407, 854649, 850727, 853170, 856884, 855552, 856321, 856045, 856448, 852288, 853775, 856601, 853137, 854347, 856689, 854267, 856567, 850498, 853009, 851785, 853007, 853926, 851822, 1466518, 854672, 853540, 856135…	1529	241	6279	1.56767	0.000731886	4.57596e-05	4.20599e-05
KEGG_PATHWAY	sce00561:Glycerolipid metabolism	22	1.40127	1.60817e-06	856044, 855361, 856791, 854287, 855201, 854346, 855205, 854556, 855368, 855137, 856804, 850432, 853768, 854758, 853119, 856759, 853941, 855206, 854932, 851878, 854419, 851628	613	32	2412	2.70514	0.000184923	3.10913e-05	2.54627e-05
GOTERM_BP_DIRECT	GO:0005975~carbohydrate metabolic process	51	3.24841	1.73494e-06	856671, 854095, 853163, 856314, 856705, 851016, 855659, 850886, 852821, 850402, 851539, 853916, 855472, 856289, 852286, 855352, 855359, 853204, 852639, 850614, 855480, 851481, 852530, 851564, 850992, 856137, 853102, 852721, 853732, 852128, 850746, 854708, 855131, 853199, 853196, 850361, 856107, 853235, 855732, 854644, 856787, 852663, 855769, 853108, 851007, 854635, 852934, 850437, 850910, 852856,…	1492	105	5678	1.84845	0.00316645	0.000452819	0.000445384
KEGG_PATHWAY	sce01240:Biosynthesis of cofactors	58	3.69427	2.50571e-06	855384, 855383, 854057, 853482, 854099, 854930, 855501, 853203, 852113, 853047, 853798, 850608, 856044, 853170, 856884, 855795, 855794, 855034, 854384, 854022, 856683, 854347, 852323, 851596, 853567, 851504, 852559, 851822, 850933, 855120, 852092, 856692, 852098, 855121, 852893, 855205, 853664, 855887, 854556, 853621, 853541, 855368, 852179, 853344, 856804, 850940, 852846, 851516, 850747, 856460,…	613	131	2412	1.7421	0.000288116	4.15233e-05	3.40061e-05
GOTERM_MF_DIRECT	GO:0051015~actin filament binding	23	1.46497	5.13801e-06	851085, 855771, 850580, 855117, 853862, 855645, 853433, 850450, 855478, 855048, 852971, 855136, 851532, 853856, 854549, 854777, 852536, 854748, 856409, 853528, 853729, 854819, 851707	1322	35	5045	2.50778	0.00609048	0.00305454	0.00301344
GOTERM_BP_DIRECT	GO:0008654~phospholipid biosynthetic process	25	1.59236	6.58148e-06	853061, 855201, 852330, 853288, 853536, 856748, 851413, 856229, 850788, 850824, 851917, 855490, 855593, 854042, 853052, 855552, 856366, 852186, 854346, 855457, 856523, 854125, 853941, 852317, 851701	1492	40	5678	2.37852	0.0119589	0.00135559	0.00133333
GOTERM_BP_DIRECT	GO:0051603~proteolysis involved in cellular protein catabolic process	17	1.0828	6.67779e-06	854882, 854544, 853456, 853761, 853036, 856830, 856731, 853168, 853267, 854119, 854328, 852239, 851105, 856218, 850611, 855949, 852528	1492	22	5678	2.94071	0.0121328	0.00135559	0.00133333
GOTERM_CC_DIRECT	GO:0032126~eisosome	16	1.01911	6.8911e-06	854053, 856272, 856103, 855047, 855453, 850360, 852341, 855110, 852101, 851132, 851596, 854953, 855548, 854701, 852977, 852309	1529	21	6279	3.12884	0.00323359	0.000190519	0.000175115
GOTERM_MF_DIRECT	GO:0008289~lipid binding	24	1.52866	7.85891e-06	856389, 856103, 851392, 852382, 854253, 854412, 852035, 853882, 853366, 853872, 851445, 853416, 850532, 850367, 855637, 850654, 853589, 856207, 851996, 852977, 852925, 851978, 854903, 850903	1322	38	5045	2.41022	0.00930075	0.00311475	0.00307283
GOTERM_CC_DIRECT	GO:0016021~integral component of membrane	443	28.2166	1.10025e-05	854170, 854052, 855142, 853085, 855261, 856350, 856597, 855023, 855029, 855147, 856357, 856599, 856229, 856480, 856241, 855156, 856001, 856008, 850938, 854070, 855284, 855041, 856492, 856013, 854077, 856496, 856018, 856137, 850821, 850942, 851917, 850829, 855050, 854081, 855051, 856140, 855056, 850953, 855580, 852196, 856675, 854013, 853042, 855342, 854494, 854253, 852079, 855348, 854259, 856555,…	1529	1556	6279	1.16917	0.00515787	0.000287288	0.000264061
GOTERM_BP_DIRECT	GO:0006511~ubiquitin-dependent protein catabolic process	48	3.05732	1.49629e-05	854291, 851140, 852471, 855563, 851461, 852593, 852037, 852576, 851641, 855147, 852212, 853168, 853712, 852468, 856704, 851631, 852822, 851557, 853832, 854206, 851757, 856607, 856021, 855350, 856862, 855036, 856223, 854882, 852583, 853670, 854544, 854149, 853973, 856887, 850562, 856886, 853399, 853036, 856742, 852003, 854735, 854119, 855724, 851842, 851424, 852736, 850613, 852939	1492	103	5678	1.7735	0.0269817	0.00273372	0.00268883
GOTERM_CC_DIRECT	GO:0005758~mitochondrial intermembrane space	42	2.67516	2.08819e-05	856395, 851380, 853540, 854651, 852098, 854231, 850593, 852177, 853940, 853585, 855268, 854257, 852688, 853259, 851733, 853798, 853639, 850865, 851955, 851437, 850727, 856180, 855054, 853491, 856785, 855014, 855176, 854022, 852167, 853775, 853379, 855732, 850441, 852323, 855669, 854855, 853568, 853945, 852916, 851628, 853707, 850915	1529	93	6279	1.8546	0.0097666	0.000516553	0.000474789
GOTERM_BP_DIRECT	GO:0006811~ion transport	53	3.3758	2.40364e-05	854893, 854013, 850772, 851610, 853679, 855736, 855857, 854007, 852709, 856241, 856444, 856045, 856888, 856644, 853497, 855797, 855308, 851786, 851862, 855669, 852117, 852637, 852878, 852716, 850736, 854070, 855080, 855284, 854077, 855369, 852177, 853585, 851685, 853853, 852327, 850821, 850502, 850942, 851437, 850829, 855050, 856345, 853352, 852066, 853351, 854685, 854564, 852147, 856027, 854959,…	1492	119	5678	1.69494	0.0429878	0.00382233	0.00375956
GOTERM_BP_DIRECT	GO:0043328~protein targeting to vacuole involved in ubiquitin-dependent protein catabolic process via the multivesicular body sorting pathway	19	1.21019	2.55791e-05	856021, 854430, 856387, 855166, 853037, 853566, 856337, 856105, 851135, 851960, 856886, 851431, 853212, 851348, 855927, 855739, 853626, 852605, 854907	1492	28	5678	2.58239	0.0456829	0.00382233	0.00375956
GOTERM_BP_DIRECT	GO:0007015~actin filament organization	24	1.52866	2.71977e-05	856294, 854353, 851392, 855640, 855584, 852351, 855645, 855711, 855634, 851421, 855478, 852971, 855136, 851420, 854713, 850653, 850367, 854549, 850323, 851339, 853528, 850903, 853729, 851707	1492	40	5678	2.28338	0.0485024	0.00382233	0.00375956
GOTERM_CC_DIRECT	GO:0043231~intracellular membrane-bounded organelle	31	1.97452	4.58147e-05	854092, 854151, 852290, 855020, 856294, 855003, 856454, 856597, 854412, 856748, 856229, 850903, 851918, 855490, 855593, 856389, 856367, 851392, 855634, 855018, 853357, 855457, 855478, 851431, 853872, 851566, 855869, 853589, 852878, 851822, 850914	1529	63	6279	2.02071	0.0213032	0.00107664	0.000989597
GOTERM_CC_DIRECT	GO:0019898~extrinsic component of membrane	23	1.46497	4.87242e-05	855043, 854072, 856162, 856004, 855201, 854057, 856102, 852230, 856573, 852200, 853664, 853379, 852785, 855983, 853872, 851445, 852402, 853416, 853138, 851105, 854910, 851978, 850619	1529	41	6279	2.30371	0.0226407	0.00109049	0.00100233
KEGG_PATHWAY	sce00564:Glycerophospholipid metabolism	23	1.46497	5.33005e-05	855593, 854151, 855020, 854095, 853061, 855201, 855552, 854651, 854682, 854346, 855018, 856523, 855895, 853536, 856748, 853941, 853007, 856229, 851413, 851878, 852317, 851539, 850824	613	40	2412	2.26248	0.00611097	0.000772857	0.000632943
GOTERM_BP_DIRECT	GO:0044396~actin cortical patch organization	11	0.700637	5.85385e-05	851532, 853856, 852536, 854748, 853528, 851085, 855640, 855771, 852233, 852276, 852971	1492	12	5678	3.48849	0.101485	0.00763927	0.00751384
GOTERM_MF_DIRECT	GO:0016757~transferase activity, transferring glycosyl groups	40	2.54777	6.22775e-05	856050, 856671, 856054, 852094, 852196, 853142, 853302, 856314, 852498, 853102, 852303, 856705, 853932, 852423, 850962, 852008, 851832, 850886, 852326, 852920, 850569, 852845, 853935, 850608, 853253, 856289, 856782, 851210, 855874, 853256, 853597, 855796, 856716, 855703, 852635, 855928, 850910, 852735, 856718, 855529	1322	85	5045	1.79585	0.071375	0.018512	0.0182629
GOTERM_CC_DIRECT	GO:0005839~proteasome core complex	12	0.764331	8.65937e-05	854328, 854119, 852239, 856218, 850611, 854882, 854544, 853456, 853036, 856830, 856731, 853168	1529	15	6279	3.28528	0.0398836	0.00184996	0.00170038
GOTERM_CC_DIRECT	GO:0005811~lipid particle	30	1.91083	9.19305e-05	855361, 855183, 856393, 855003, 855201, 852330, 854495, 854110, 850790, 854995, 853465, 852476, 854109, 852503, 852329, 853717, 854808, 855490, 854682, 853395, 852200, 855137, 855895, 852138, 853768, 853941, 852557, 852977, 851868, 854419	1529	62	6279	1.98707	0.0422891	0.00187858	0.00172669
GOTERM_MF_DIRECT	GO:0004175~endopeptidase activity	14	0.89172	0.000135636	855051, 854882, 854544, 853456, 853036, 856830, 856731, 853168, 854735, 854119, 854328, 852239, 856218, 850611	1322	19	5045	2.81193	0.148948	0.0279887	0.027612
KEGG_PATHWAY	sce00053:Ascorbate and aldarate metabolism	10	0.636943	0.000137575	852446, 856804, 854888, 855206, 856044, 855057, 855205, 854556, 855368, 855137	613	11	2412	3.57704	0.0156977	0.00177319	0.00145218
GOTERM_MF_DIRECT	GO:0004298~threonine-type endopeptidase activity	9	0.573248	0.000150415	854328, 854119, 852239, 856218, 850611, 853456, 853036, 856830, 856731	1322	9	5045	3.81619	0.163774	0.0279887	0.027612
GOTERM_BP_DIRECT	GO:0006749~glutathione metabolic process	13	0.828025	0.000163136	855292, 855492, 856014, 853951, 853123, 853058, 852124, 854856, 855009, 850666, 851006, 851713, 851437	1492	17	5678	2.91019	0.257874	0.018628	0.0183222
GOTERM_BP_DIRECT	GO:0010499~proteasomal ubiquitin-independent protein catabolic process	13	0.828025	0.000163136	854882, 854544, 853456, 853036, 856830, 856731, 853168, 854119, 854328, 852467, 852239, 856218, 850611	1492	17	5678	2.91019	0.257874	0.018628	0.0183222
GOTERM_BP_DIRECT	GO:0000147~actin cortical patch assembly	12	0.764331	0.000182702	854713, 852405, 851409, 855640, 850903, 851392, 852351, 855711, 850450, 850396, 852276, 855478	1492	15	5678	3.0445	0.283953	0.0196351	0.0193127
GOTERM_MF_DIRECT	GO:0004601~peroxidase activity	10	0.636943	0.000182931	852215, 853842, 854855, 852546, 850799, 854805, 852979, 854980, 852064, 853940	1322	11	5045	3.46926	0.195493	0.0279887	0.027612
GOTERM_MF_DIRECT	GO:0016209~antioxidant activity	11	0.700637	0.000188317	852215, 853776, 853842, 854855, 853568, 852546, 850799, 854805, 854980, 852064, 856399	1322	13	5045	3.22908	0.200629	0.0279887	0.027612
GOTERM_BP_DIRECT	GO:0005978~glycogen biosynthetic process	11	0.700637	0.000193712	853932, 856705, 853732, 850962, 855131, 850569, 850979, 855359, 850572, 853830, 856314	1492	13	5678	3.22015	0.298223	0.0196618	0.0193389
KEGG_PATHWAY	sce00380:Tryptophan metabolism	14	0.89172	0.000202398	856044, 853386, 856079, 853482, 855205, 854556, 853541, 855137, 852179, 856804, 855206, 851726, 850933, 852979	613	20	2412	2.75432	0.0230093	0.00234782	0.00192278
GOTERM_BP_DIRECT	GO:0097502~mannosylation	18	1.1465	0.000224702	856050, 856054, 852094, 852196, 856675, 856057, 853302, 853256, 855796, 852498, 855703, 851832, 852635, 852458, 852845, 852735, 856718, 853935	1492	29	5678	2.36212	0.336882	0.0216069	0.0212521
GOTERM_CC_DIRECT	GO:0005777~peroxisome	38	2.42038	0.000230341	855041, 856294, 851481, 852691, 854352, 856694, 850990, 853421, 851244, 856555, 852523, 855956, 850620, 854745, 850941, 852846, 852329, 850888, 851539, 855518, 855350, 856565, 853254, 853034, 851494, 850361, 851034, 853477, 853058, 853647, 854018, 853842, 852557, 854855, 851842, 850514, 852979, 852915	1529	89	6279	1.75338	0.102617	0.00451084	0.00414613
GOTERM_BP_DIRECT	GO:0030433~ubiquitin-dependent ERAD pathway	26	1.65605	0.000265102	854072, 856355, 855222, 854995, 852576, 850310, 850794, 854433, 852468, 850500, 852822, 851757, 850305, 850746, 850904, 855036, 852222, 854149, 856249, 854168, 853399, 851431, 851467, 854812, 852736, 852939	1492	50	5678	1.97893	0.3841	0.024217	0.0238194
GOTERM_MF_DIRECT	GO:0016798~hydrolase activity, acting on glycosyl bonds	24	1.52866	0.000291577	856671, 853199, 853196, 852286, 855352, 853235, 852530, 854644, 851564, 856314, 853102, 856137, 850992, 852721, 855659, 851007, 853204, 854635, 850910, 852856, 850746, 855804, 853916, 854708	1322	45	5045	2.0353	0.293008	0.0350633	0.0345915
GOTERM_MF_DIRECT	GO:0004553~hydrolase activity, hydrolyzing O-glycosyl compounds	14	0.89172	0.000294898	856671, 853199, 853196, 855352, 852530, 854644, 853102, 856137, 850992, 856705, 851007, 850910, 852856, 854708	1322	20	5045	2.67133	0.295794	0.0350633	0.0345915
GOTERM_CC_DIRECT	GO:0005741~mitochondrial outer membrane	42	2.67516	0.000330854	856294, 855003, 853363, 856597, 854670, 854495, 850790, 854995, 851223, 852477, 854256, 852179, 852476, 852531, 854768, 856748, 855811, 852546, 854745, 854888, 856229, 855916, 850789, 853916, 855593, 856103, 854682, 855137, 854856, 851225, 850795, 853768, 850654, 853842, 855669, 853667, 854459, 855602, 852977, 854957, 852915, 853707	1529	103	6279	1.67454	0.144036	0.00622005	0.00571715
GOTERM_MF_DIRECT	GO:0003779~actin binding	24	1.52866	0.000440539	851085, 854353, 851051, 855640, 855584, 855771, 855117, 853862, 850450, 852276, 855478, 854289, 852971, 855136, 851532, 853856, 854777, 852536, 851996, 851658, 851635, 853528, 853729, 851707	1322	46	5045	1.99105	0.407803	0.0476182	0.0469774
GOTERM_BP_DIRECT	GO:0010498~proteasomal protein catabolic process	12	0.764331	0.000445904	854328, 854119, 852239, 856218, 850611, 854882, 854544, 853456, 853036, 856830, 856731, 853168	1492	16	5678	2.85422	0.557491	0.0387936	0.0381566
GOTERM_BP_DIRECT	GO:0016226~iron-sulfur cluster assembly	15	0.955414	0.000478148	856161, 856180, 856774, 851084, 853642, 854401, 856522, 853586, 855968, 852789, 851986, 853826, 851437, 854814, 853945	1492	23	5678	2.48193	0.582831	0.039708	0.039056
GOTERM_MF_DIRECT	GO:0004364~glutathione transferase activity	8	0.509554	0.000514957	855292, 854856, 850322, 850666, 856921, 853951, 852124, 853058	1322	8	5045	3.81619	0.457974	0.0510236	0.050337
GOTERM_MF_DIRECT	GO:0043130~ubiquitin binding	24	1.52866	0.000651914	852394, 851140, 856862, 851392, 854871, 856387, 854066, 852233, 852222, 854995, 852276, 851135, 851960, 856886, 851431, 851467, 852468, 852536, 853667, 854206, 851930, 855739, 852939, 851918	1322	47	5045	1.94869	0.539471	0.0596251	0.0588227
GOTERM_CC_DIRECT	GO:0031225~anchored component of membrane	29	1.84713	0.000657699	854151, 856671, 855780, 854174, 855020, 852370, 856893, 853268, 853367, 850891, 855389, 853102, 856527, 856729, 850309, 855255, 855018, 851056, 856546, 854564, 852147, 854857, 850730, 852359, 853766, 851625, 850811, 851649, 850812	1529	65	6279	1.83218	0.265981	0.0118892	0.0109279
GOTERM_MF_DIRECT	GO:0051537~2 iron, 2 sulfur cluster binding	13	0.828025	0.000747131	856180, 856048, 854401, 851551, 856921, 856689, 853203, 855968, 850685, 852302, 853639, 851437, 853945	1322	19	5045	2.61108	0.588798	0.0634528	0.0625989
GOTERM_CC_DIRECT	GO:0005794~Golgi apparatus	86	5.47771	0.000774536	852394, 851261, 856675, 853680, 852593, 854770, 852079, 853123, 851973, 852303, 852302, 853634, 856229, 853832, 851459, 850767, 851657, 851418, 852826, 851978, 850769, 852709, 855593, 854261, 852083, 853253, 856367, 855277, 853890, 851551, 852485, 855237, 855830, 856523, 853497, 853256, 855796, 851786, 855703, 851862, 852676, 852830, 852635, 853963, 856718, 854935, 852715, 850619, 855483, 853261,…	1529	257	6279	1.37419	0.305229	0.0134827	0.0123926
GOTERM_BP_DIRECT	GO:0006914~autophagy	34	2.16561	0.00082554	854071, 853261, 854072, 856576, 852394, 851021, 852230, 851585, 855983, 854653, 855741, 853416, 855954, 850941, 854206, 851833, 855937, 853916, 850908, 851070, 856162, 852083, 856004, 853254, 856602, 852200, 850441, 854323, 850432, 855825, 851445, 853942, 855949, 853829	1492	76	5678	1.70252	0.779026	0.0655766	0.0644998
GOTERM_BP_DIRECT	GO:0032511~late endosome to vacuole transport via multivesicular body sorting pathway	15	0.955414	0.000872025	854053, 852097, 851261, 856862, 853991, 851087, 852101, 853884, 853398, 854256, 850400, 853589, 853502, 850712, 853906	1492	24	5678	2.37852	0.797042	0.0663829	0.0652928
GOTERM_CC_DIRECT	GO:0005759~mitochondrial matrix	50	3.18471	0.000937345	856399, 856432, 854930, 853640, 851861, 854532, 855268, 852821, 854407, 853839, 856160, 856048, 854187, 856800, 853137, 852314, 851986, 851105, 1466518, 855084, 856774, 851084, 852572, 854556, 853940, 853586, 856804, 851515, 851437, 852528, 856180, 854083, 854760, 855651, 854681, 850361, 854401, 856107, 855732, 850441, 854883, 856786, 855968, 853149, 856615, 854910, 851845, 853826, 850833, 854919	1529	134	6279	1.53232	0.356452	0.0157059	0.0144361
GOTERM_BP_DIRECT	GO:0051666~actin cortical patch localization	12	0.764331	0.000964312	850367, 850323, 851996, 854261, 856409, 854353, 851409, 851051, 850580, 853729, 853433, 855136	1492	17	5678	2.68633	0.828576	0.0704719	0.0693148
GOTERM_CC_DIRECT	GO:0005775~vacuolar lumen	9	0.573248	0.000969089	850432, 853290, 853677, 854959, 855343, 855980, 856513, 856137, 853267	1529	11	6279	3.35995	0.365991	0.0157059	0.0144361
KEGG_PATHWAY	sce00071:Fatty acid degradation	13	0.828025	0.00102715	856044, 856079, 854495, 855205, 851386, 852442, 850990, 854556, 855137, 856804, 855206, 852636, 854808	613	20	2412	2.55759	0.111467	0.0108318	0.00887086
GOTERM_CC_DIRECT	GO:0005618~cell wall	15	0.955414	0.00112538	852390, 854174, 852370, 853199, 855255, 853196, 855352, 851056, 853102, 851511, 856527, 853766, 851625, 852856, 850309	1529	26	6279	2.3692	0.410939	0.0167863	0.0154292
GOTERM_CC_DIRECT	GO:0019774~proteasome core complex, beta-subunit complex	7	0.44586	0.0011429	854328, 852239, 856218, 850611, 853456, 856830, 856731	1529	7	6279	4.10661	0.415776	0.0167863	0.0154292
GOTERM_CC_DIRECT	GO:0005885~Arp2/3 protein complex	7	0.44586	0.0011429	851532, 853856, 852536, 854748, 853528, 851085, 855771	1529	7	6279	4.10661	0.415776	0.0167863	0.0154292
GOTERM_BP_DIRECT	GO:0003333~amino acid transmembrane transport	16	1.01911	0.00114359	852360, 854530, 855453, 855451, 855854, 852189, 856855, 854721, 855863, 850333, 850665, 850489, 851616, 852429, 852946, 851738	1492	27	5678	2.25519	0.876521	0.0803595	0.07904		ID	Gene Name
GOTERM_CC_DIRECT	GO:0005887~integral component of plasma membrane	28	1.78344	0.00119915	852293, 855580, 855660, 854995, 855369, 850330, 850376, 853019, 853218, 853677, 853039, 854447, 854007, 852429, 856345, 853352, 856444, 856327, 850781, 856644, 854685, 853497, 852599, 852637, 854959, 852878, 854916, 850518	1529	64	6279	1.79664	0.431037	0.0170789	0.015698		852429	Agp2p(AGP2)
KEGG_PATHWAY	sce04138:Autophagy - yeast	37	2.35669	0.00134258	855043, 853261, 851085, 856576, 852394, 851261, 855342, 852230, 851421, 851585, 852696, 855983, 855741, 851753, 851532, 856649, 853856, 855954, 850941, 851339, 855937, 854748, 850908, 856162, 856004, 853275, 855771, 855898, 852200, 855237, 856425, 852785, 850432, 855625, 852536, 855949, 853528	613	90	2412	1.61762	0.143157	0.0129783	0.0106288		850489	Agp3p(AGP3)
GOTERM_MF_DIRECT	GO:0010181~FMN binding	13	0.828025	0.00142548	856161, 855894, 850360, 852341, 854220, 856584, 853510, 852323, 851596, 853602, 850698, 850588, 855932	1322	20	5045	2.48052	0.816604	0.106466	0.105034		854721	Avt7p(AVT7)
GOTERM_BP_DIRECT	GO:0006631~fatty acid metabolic process	20	1.27389	0.00143045	854160, 851087, 856464, 854495, 854352, 856745, 853642, 850990, 854267, 850332, 852523, 852314, 852456, 850400, 855845, 855955, 852925, 855518, 852825, 854808	1492	38	5678	2.00296	0.92696	0.096794	0.0952046		855863	Dip5p(DIP5)
GOTERM_MF_DIRECT	GO:0015171~amino acid transmembrane transporter activity	15	0.955414	0.00145767	852360, 854530, 855453, 855451, 855854, 852189, 856855, 854721, 855863, 850333, 850665, 850489, 851616, 852429, 851738	1322	25	5045	2.28971	0.8235	0.106466	0.105034		852946	Mup1p(MUP1)
GOTERM_MF_DIRECT	GO:0022857~transmembrane transporter activity	50	3.18471	0.0015876	855261, 851063, 854332, 855023, 855660, 852596, 852149, 851697, 853039, 854447, 854007, 852108, 854924, 852309, 852946, 855113, 856444, 855793, 853175, 856327, 850462, 856644, 854267, 852956, 851943, 851946, 853968, 850938, 854030, 852293, 856492, 854672, 856496, 850394, 854237, 850671, 852774, 851995, 853336, 852689, 852601, 853617, 853739, 852803, 856345, 856783, 852189, 854685, 854916, 855969	1322	128	5045	1.4907	0.848801	0.106466	0.105034		850665	S-methylmethionine permease MMP1(MMP1)
GOTERM_MF_DIRECT	GO:0004602~glutathione peroxidase activity	7	0.44586	0.00173676	854856, 850322, 853842, 854855, 852546, 855492, 852124	1322	7	5045	3.81619	0.87341	0.106466	0.105034		851738	Ssy1p(SSY1)
GOTERM_BP_DIRECT	GO:0071985~multivesicular body sorting pathway	7	0.44586	0.00176684	854449, 853589, 856021, 855739, 856387, 853566, 856105	1492	7	5678	3.80563	0.960547	0.0981177	0.0965066		850333	amino acid transporter AGP1(AGP1)
GOTERM_BP_DIRECT	GO:0005992~trehalose biosynthetic process	7	0.44586	0.00176684	852423, 853732, 855131, 851646, 855303, 853830, 854872	1492	7	5678	3.80563	0.960547	0.0981177	0.0965066		851616	amino acid transporter BAP3(BAP3)
GOTERM_BP_DIRECT	GO:0034314~Arp2/3 complex-mediated actin nucleation	7	0.44586	0.00176684	851532, 853856, 852536, 854748, 853528, 851085, 855771	1492	7	5678	3.80563	0.960547	0.0981177	0.0965066		852189	amino acid transporter(AVT5)
GOTERM_BP_DIRECT	GO:0030833~regulation of actin filament polymerization	7	0.44586	0.00176684	853856, 852536, 854748, 851085, 855771, 855584, 850450	1492	7	5678	3.80563	0.960547	0.0981177	0.0965066		855451	arginine permease ALP1(ALP1)
GOTERM_MF_DIRECT	GO:0051920~peroxiredoxin activity	8	0.509554	0.00179085	852215, 853842, 854855, 852546, 850799, 854805, 854980, 852064	1322	9	5045	3.39217	0.881309	0.106466	0.105034		856855	aspartate/glutamate transporter(AVT6)
GOTERM_MF_DIRECT	GO:0005385~zinc ion transmembrane transporter activity	8	0.509554	0.00179085	853679, 851786, 852637, 850821, 855284, 854494, 855775, 854246	1322	9	5045	3.39217	0.881309	0.106466	0.105034		855854	bifunctional polyamine/amino acid permease SAM3(SAM3)
KEGG_PATHWAY	sce00740:Riboflavin metabolism	11	0.700637	0.00179392	856625, 852390, 851537, 852559, 851822, 852408, 851516, 854022, 852098, 852389, 851299	613	16	2412	2.70514	0.186562	0.0160073	0.0131094		852360	branched-chain amino acid permease BAP2(BAP2)
GOTERM_BP_DIRECT	GO:0072583~clathrin-dependent endocytosis	8	0.509554	0.00182595	854092, 851467, 856367, 853077, 851918, 852243, 853157, 856566	1492	9	5678	3.38278	0.964594	0.0981177	0.0965066		855453	lysine permease(LYP1)
GOTERM_BP_DIRECT	GO:0006829~zinc II ion transport	8	0.509554	0.00182595	853679, 851786, 852637, 850821, 855284, 854494, 855369, 855775	1492	9	5678	3.38278	0.964594	0.0981177	0.0965066		854530	proline permease PUT4(PUT4)
GOTERM_BP_DIRECT	GO:0071577~zinc II ion transmembrane transport	8	0.509554	0.00182595	853679, 851786, 852637, 850821, 855284, 854494, 855775, 854246	1492	9	5678	3.38278	0.964594	0.0981177	0.0965066
GOTERM_BP_DIRECT	GO:0006623~protein targeting to vacuole	28	1.78344	0.00226901	855300, 852394, 851261, 853042, 852593, 853884, 853566, 852774, 854256, 855983, 854966, 852402, 853416, 850767, 855739, 853991, 856387, 852264, 853890, 855237, 856105, 855016, 851135, 852785, 855631, 856538, 853906, 850619	1492	62	5678	1.71867	0.984274	0.115346	0.113452
GOTERM_BP_DIRECT	GO:0031505~fungal-type cell wall organization	53	3.3758	0.00227282	854170, 853282, 856671, 854174, 850891, 850376, 855813, 855659, 853916, 853693, 855036, 855634, 854149, 854421, 855478, 850662, 854857, 853644, 851304, 852359, 853766, 853326, 853568, 851625, 850811, 850812, 853729, 856054, 852370, 856893, 854797, 853388, 853102, 854631, 851511, 852326, 856729, 854946, 850309, 856142, 853199, 855255, 853232, 851131, 851056, 851132, 855136, 854953, 851007, 851646,…	1492	139	5678	1.45107	0.984384	0.115346	0.113452
GOTERM_CC_DIRECT	GO:0005905~clathrin-coated pit	8	0.509554	0.00294456	855869, 854092, 852666, 853077, 853461, 852243, 853157, 856566	1529	10	6279	3.28528	0.749922	0.0395412	0.0363442
GOTERM_CC_DIRECT	GO:0008541~proteasome regulatory particle, lid subcomplex	8	0.509554	0.00294456	850554, 850613, 851140, 856223, 851408, 851461, 852037, 856742	1529	10	6279	3.28528	0.749922	0.0395412	0.0363442
GOTERM_MF_DIRECT	GO:0016740~transferase activity	224	14.2675	0.00328728	855384, 854053, 856597, 854057, 851582, 850372, 853522, 855149, 855268, 852303, 852423, 851216, 856229, 855938, 855936, 855157, 855036, 854186, 855711, 856800, 856249, 854856, 851346, 855703, 852559, 852317, 854190, 856010, 856134, 852330, 853302, 852696, 855840, 853300, 853421, 853536, 855955, 850940, 856922, 852326, 850941, 851910, 850824, 855292, 855170, 851010, 852101, 855732, 850950, 855845,…	1322	734	5045	1.16461	0.98006	0.186123	0.183618
GOTERM_BP_DIRECT	GO:0045454~cell redox homeostasis	14	0.89172	0.0033007	854980, 852064, 856014, 853123, 852312, 856214, 852215, 855879, 856506, 855669, 850799, 851713, 854805, 851955	1492	24	5678	2.21995	0.997627	0.162983	0.160307
GOTERM_CC_DIRECT	GO:0005737~cytoplasm	662	42.1656	0.00355246	854291, 854052, 856231, 855021, 854053, 856351, 856113, 856355, 854179, 856358, 856236, 856599, 854064, 856241, 855272, 855150, 854183, 855157, 856004, 856487, 854186, 855034, 854066, 855154, 854187, 856001, 856249, 850933, 851904, 854190, 854072, 854193, 855047, 856014, 855045, 855166, 855044, 855048, 856009, 850941, 850823, 850824, 850827, 851918, 855171, 855292, 855170, 855291, 855054, 856142,…	1529	2529	6279	1.07496	0.812247	0.0463793	0.0426295
GOTERM_BP_DIRECT	GO:0055072~iron ion homeostasis	15	0.955414	0.00392746	855080, 856345, 854013, 856888, 855369, 856644, 854564, 855797, 852147, 854007, 852117, 850502, 851437, 850911, 850736	1492	27	5678	2.11424	0.999249	0.188828	0.185727
GOTERM_CC_DIRECT	GO:0034045~pre-autophagosomal structure membrane	14	0.89172	0.00398862	854071, 853261, 854072, 856162, 856004, 851021, 855983, 854323, 851445, 855825, 853416, 853138, 855954, 850908	1529	26	6279	2.21125	0.847165	0.0506662	0.0465698
GOTERM_BP_DIRECT	GO:0000422~mitophagy	19	1.21019	0.00404079	851070, 856162, 856004, 856576, 852200, 850441, 851585, 855741, 851225, 851445, 855825, 853416, 850653, 853138, 854745, 855954, 855937, 853916, 853829	1492	38	5678	1.90282	0.99939	0.189296	0.186187
GOTERM_CC_DIRECT	GO:0009986~cell surface	11	0.700637	0.00434599	855659, 851007, 853326, 852856, 855804, 853199, 853196, 853916, 855352, 854011, 854421	1529	18	6279	2.50959	0.870887	0.053753	0.049407
GOTERM_BP_DIRECT	GO:0006979~response to oxidative stress	13	0.828025	0.0043908	854980, 852064, 853940, 854344, 850324, 853842, 854855, 852546, 850974, 851437, 855905, 852979, 850902	1492	22	5678	2.24878	0.999679	0.20055	0.197257
GOTERM_BP_DIRECT	GO:0006865~amino acid transport	22	1.40127	0.00469601	855113, 852360, 854530, 855453, 853680, 855451, 855854, 852189, 852596, 856855, 850671, 854721, 855863, 850333, 851697, 850665, 850489, 851616, 852429, 852803, 852946, 851738	1492	47	5678	1.78136	0.999817	0.204706	0.201345
GOTERM_BP_DIRECT	GO:0019363~pyridine nucleotide biosynthetic process	8	0.509554	0.00470589	852846, 850933, 853482, 854384, 850608, 852893, 850310, 852179	1492	10	5678	3.0445	0.99982	0.204706	0.201345
KEGG_PATHWAY	sce00620:Pyruvate metabolism	23	1.46497	0.00520437	856044, 851380, 851481, 856079, 852266, 855205, 851386, 852442, 854556, 855368, 855137, 854014, 852146, 856804, 851346, 856638, 855009, 851865, 855206, 855619, 852636, 854529, 853839	613	52	2412	1.74037	0.451224	0.0392892	0.0321765
GOTERM_BP_DIRECT	GO:0061709~reticulophagy	14	0.89172	0.00524398	856162, 855640, 851021, 852186, 852200, 854256, 855136, 856599, 854323, 853416, 851224, 850712, 853729, 850619	1492	25	5678	2.13115	0.999933	0.222808	0.21915
GOTERM_MF_DIRECT	GO:0016620~oxidoreductase activity, acting on the aldehyde or oxo group of donors, NAD or NADP as acceptor	10	0.636943	0.00579402	856804, 855206, 856044, 856432, 853395, 855205, 856800, 854556, 855137, 853465	1322	15	5045	2.54413	0.999001	0.300184	0.296145
GOTERM_MF_DIRECT	GO:0031625~ubiquitin protein ligase binding	15	0.955414	0.00580676	853290, 856142, 854183, 852173, 854433, 854735, 852138, 852468, 853712, 851631, 850620, 851424, 850578, 851108, 852834	1322	28	5045	2.04439	0.999016	0.300184	0.296145
GOTERM_BP_DIRECT	GO:0033215~iron assimilation by reduction and transport	6	0.382166	0.0058272	855080, 852117, 850502, 852716, 850736, 854013	1492	6	5678	3.80563	0.999977	0.241961	0.237988
KEGG_PATHWAY	sce00100:Steroid biosynthesis	11	0.700637	0.00589831	852951, 853717, 855003, 856597, 855441, 855242, 850790, 855029, 855753, 852872, 852883	613	18	2412	2.40457	0.493542	0.0392892	0.0321765
KEGG_PATHWAY	sce02010:ABC transporters	11	0.700637	0.00589831	855858, 853647, 855956, 850369, 851713, 853198, 853671, 854324, 852015, 851574, 856049	613	18	2412	2.40457	0.493542	0.0392892	0.0321765
KEGG_PATHWAY	sce00730:Thiamine metabolism	11	0.700637	0.00589831	856625, 855384, 852390, 851537, 852092, 854099, 855887, 853621, 852389, 853047, 851299	613	18	2412	2.40457	0.493542	0.0392892	0.0321765
KEGG_PATHWAY	sce00410:beta-Alanine metabolism	9	0.573248	0.0060966	856804, 855291, 855206, 856044, 852902, 855034, 855205, 854556, 855137	613	13	2412	2.72406	0.505029	0.0392892	0.0321765
GOTERM_CC_DIRECT	GO:0005773~vacuole	68	4.33121	0.0061777	856350, 854094, 855261, 855343, 856079, 855980, 852593, 854412, 850296, 852596, 856513, 850574, 855983, 850772, 853679, 854648, 851697, 854924, 853758, 851815, 853290, 856088, 856162, 855113, 856004, 851551, 852200, 852485, 850782, 852998, 855949, 852878, 852092, 854394, 852097, 855201, 856855, 853345, 854795, 851685, 853388, 853267, 855840, 856137, 852402, 851434, 852721, 856649, 850544, 851875,…	1529	209	6279	1.33612	0.945662	0.0726525	0.0667785
GOTERM_CC_DIRECT	GO:0045121~membrane raft	15	0.955414	0.00623702	855284, 854494, 850360, 852341, 850367, 854953, 851304, 850502, 851878, 851713, 850678, 852405, 852309, 851815, 850829	1529	30	6279	2.0533	0.947165	0.0726525	0.0667785
GOTERM_CC_DIRECT	GO:0000407~pre-autophagosomal structure	18	1.1465	0.00633777	853261, 854072, 856162, 852083, 856004, 856576, 852200, 855983, 851585, 855741, 851445, 853416, 850941, 853942, 855954, 851833, 855937, 850908	1529	39	6279	1.89536	0.949624	0.0726525	0.0667785
GOTERM_CC_DIRECT	GO:0031966~mitochondrial membrane	31	1.97452	0.00699369	853261, 855284, 855189, 854893, 854494, 856931, 852312, 852774, 852477, 852796, 854256, 853146, 852179, 853536, 850685, 851535, 854722, 854888, 851070, 855176, 856001, 853158, 853379, 854103, 855895, 855411, 854910, 853926, 852639, 853709, 853829	1529	81	6279	1.57166	0.963065	0.0782628	0.0719351
GOTERM_MF_DIRECT	GO:0030276~clathrin binding	9	0.573248	0.00758007	851467, 853589, 850903, 851392, 853461, 851918, 855478, 853157, 856566	1322	13	5045	2.64198	0.999882	0.37553	0.370476
GOTERM_BP_DIRECT	GO:0072671~mitochondria-associated ubiquitin-dependent protein catabolic process	9	0.573248	0.00773105	852468, 851259, 853667, 856021, 856862, 852939, 854995, 850562, 851431	1492	13	5678	2.63467	0.999999	0.313881	0.308726
KEGG_PATHWAY	sce01200:Carbon metabolism	41	2.61146	0.00829096	855480, 851481, 854310, 856079, 853163, 851582, 850295, 855227, 851386, 853169, 853465, 851541, 850685, 853119, 852128, 853716, 854529, 851758, 850747, 853839, 853172, 851010, 854681, 853395, 850361, 856107, 851254, 853159, 855732, 855769, 856814, 854932, 852934, 850437, 850514, 850317, 851726, 852639, 850614, 852979, 853709	613	112	2412	1.4404	0.616124	0.0506185	0.0414548
GOTERM_BP_DIRECT	GO:0016126~sterol biosynthetic process	15	0.955414	0.00881863	855490, 855003, 856597, 855441, 855242, 854412, 856767, 855029, 855457, 856535, 855566, 852872, 852883, 852951, 850886	1492	29	5678	1.96843	1	0.350253	0.344502
GOTERM_CC_DIRECT	GO:0043332~mating projection tip	42	2.67516	0.00924032	854170, 853283, 856294, 854353, 851041, 855640, 855584, 851086, 852233, 852992, 850450, 853862, 850396, 850330, 852276, 852971, 850367, 850863, 851996, 851217, 850747, 850903, 855272, 853671, 855993, 851392, 851051, 855117, 855711, 856425, 855478, 852685, 851431, 855136, 853646, 854713, 854777, 854959, 855827, 851904, 854819, 851707	1529	120	6279	1.43731	0.987262	0.0992957	0.0912675
GOTERM_CC_DIRECT	GO:0000139~Golgi membrane	48	3.05732	0.00929577	856050, 853261, 852094, 856675, 855683, 856057, 853680, 854770, 853302, 853123, 854235, 852303, 851973, 852129, 851832, 853832, 851677, 850767, 851657, 852845, 852826, 850746, 851978, 851714, 850769, 853935, 852709, 856140, 856367, 853675, 852485, 855237, 856523, 855830, 853497, 852785, 853256, 854763, 854246, 852676, 853963, 852635, 852458, 851644, 853827, 856718, 854935, 850917	1529	141	6279	1.39799	0.987592	0.0992957	0.0912675
GOTERM_BP_DIRECT	GO:0006970~response to osmotic stress	12	0.764331	0.00940541	850367, 854170, 854758, 850974, 856791, 856048, 853729, 850829, 855951, 854344, 854653, 855136	1492	21	5678	2.17465	1	0.36561	0.359607
GOTERM_BP_DIRECT	GO:0070682~proteasome regulatory particle assembly	8	0.509554	0.0100207	853712, 854810, 851557, 851448, 852834, 853147, 854433, 852003	1492	11	5678	2.76773	1	0.381412	0.37515
GOTERM_MF_DIRECT	GO:0019888~protein phosphatase regulator activity	13	0.828025	0.0104587	856781, 852222, 855951, 852334, 854179, 852685, 851431, 854653, 852622, 855967, 851224, 851217, 850979	1322	24	5045	2.0671	0.999996	0.497416	0.490723
KEGG_PATHWAY	sce00280:Valine, leucine and isoleucine degradation	9	0.573248	0.0111053	856804, 856615, 855206, 856044, 852902, 856079, 855205, 854556, 855137	613	14	2412	2.52948	0.723142	0.0644106	0.0527501
GOTERM_CC_DIRECT	GO:0000159~protein phosphatase type 2A complex	6	0.382166	0.0113685	851217, 851421, 855951, 854179, 852685, 854653	1529	7	6279	3.51995	0.995364	0.118738	0.109138
GOTERM_BP_DIRECT	GO:0007034~vacuolar transport	14	0.89172	0.0117893	856088, 853261, 856021, 852097, 852264, 852593, 851663, 851685, 853398, 850772, 850544, 850712, 853868, 853906	1492	27	5678	1.97329	1	0.439574	0.432356
GOTERM_CC_DIRECT	GO:0031307~integral component of mitochondrial outer membrane	13	0.828025	0.012298	854651, 854670, 855137, 852477, 851223, 852531, 851225, 855669, 854888, 854745, 855602, 850789, 853707	1529	26	6279	2.0533	0.99702	0.125654	0.115494
KEGG_PATHWAY	sce04146:Peroxisome	18	1.1465	0.01276	855041, 856399, 851494, 854495, 856694, 854352, 856745, 850990, 853647, 855956, 854018, 853568, 850953, 850888, 850514, 855518, 852979, 854808	613	40	2412	1.77064	0.771642	0.0704836	0.0577237
GOTERM_BP_DIRECT	GO:0070262~peptidyl-serine dephosphorylation	7	0.44586	0.0128202	851339, 851646, 856475, 851421, 850441, 852685, 854257	1492	9	5678	2.95993	1	0.468449	0.460757
GOTERM_BP_DIRECT	GO:0006006~glucose metabolic process	12	0.764331	0.01442	853732, 856439, 852821, 852128, 855131, 850317, 852639, 850614, 855480, 853286, 853395, 853465	1492	22	5678	2.0758	1	0.516576	0.508093
GOTERM_BP_DIRECT	GO:0016236~macroautophagy	28	1.78344	0.0156359	853261, 856576, 852394, 855343, 855983, 851753, 855954, 850941, 855937, 851418, 852709, 850908, 851070, 855150, 856004, 852200, 855237, 850441, 851135, 854201, 851431, 850432, 855825, 851445, 855625, 853942, 855949, 853829	1492	70	5678	1.52225	1	0.530764	0.522049
GOTERM_BP_DIRECT	GO:0034316~negative regulation of Arp2/3 complex-mediated actin nucleation	6	0.382166	0.0159781	851635, 856277, 853037, 853433, 852276, 855478	1492	7	5678	3.26197	1	0.530764	0.522049
GOTERM_BP_DIRECT	GO:0060304~regulation of phosphatidylinositol dephosphorylation	6	0.382166	0.0159781	855637, 851978, 854903, 852382, 854253, 852186	1492	7	5678	3.26197	1	0.530764	0.522049
GOTERM_BP_DIRECT	GO:0034755~iron ion transmembrane transport	6	0.382166	0.0159781	855080, 852117, 850502, 856888, 850917, 855369	1492	7	5678	3.26197	1	0.530764	0.522049
KEGG_PATHWAY	sce04136:Autophagy - other	12	0.764331	0.016163	850941, 855954, 851339, 855043, 856162, 852394, 856004, 856576, 852200, 851421, 855741, 855983	613	23	2412	2.05291	0.846481	0.0852233	0.0697949
GOTERM_BP_DIRECT	GO:0071555~cell wall organization	36	2.29299	0.0170467	854170, 856671, 853282, 852290, 852370, 852173, 850891, 854259, 850376, 853102, 856357, 850992, 851016, 851511, 855659, 853733, 852326, 852920, 850628, 853916, 853693, 853199, 856861, 855255, 853196, 855352, 851056, 856546, 853951, 854421, 856545, 856501, 851007, 854514, 852856, 855529	1492	96	5678	1.42711	1	0.55615	0.547017
GOTERM_CC_DIRECT	GO:0008540~proteasome regulatory particle, base subcomplex	7	0.44586	0.017184	854735, 853712, 851557, 852834, 856607, 854433, 852003	1529	10	6279	2.87462	0.99971	0.164826	0.151499
GOTERM_CC_DIRECT	GO:0015629~actin cytoskeleton	7	0.44586	0.017184	853856, 852536, 854748, 855771, 853729, 854819, 855136	1529	10	6279	2.87462	0.99971	0.164826	0.151499
GOTERM_CC_DIRECT	GO:0005750~mitochondrial respiratory chain complex III	7	0.44586	0.017184	853273, 856321, 852142, 854231, 850593, 856689, 852235	1529	10	6279	2.87462	0.99971	0.164826	0.151499
KEGG_PATHWAY	sce00630:Glyoxylate and dicarboxylate metabolism	14	0.89172	0.0172595	851481, 856079, 851582, 850361, 856107, 855227, 851254, 855447, 855732, 852523, 853119, 850514, 850747, 852979	613	29	2412	1.89953	0.864959	0.0870482	0.0712894
GOTERM_BP_DIRECT	GO:0030036~actin cytoskeleton organization	15	0.955414	0.017559	854170, 856294, 854200, 855771, 853862, 856921, 853433, 850367, 850323, 854777, 853589, 854701, 851658, 853815, 856409	1492	31	5678	1.84143	1	0.562811	0.553569
GOTERM_BP_DIRECT	GO:0007005~mitochondrion organization	19	1.21019	0.018506	854094, 855014, 856862, 856135, 856365, 856601, 855401, 854883, 852125, 851223, 853146, 851225, 855659, 854945, 850654, 855669, 852513, 850429, 850619	1492	43	5678	1.68156	1	0.570442	0.561075
GOTERM_MF_DIRECT	GO:0008379~thioredoxin peroxidase activity	5	0.318471	0.018529	852215, 850799, 854805, 854980, 852064	1322	5	5045	3.81619	1	0.815962	0.804982
GOTERM_MF_DIRECT	GO:0016780~phosphotransferase activity, for other substituted phosphate groups	5	0.318471	0.018529	856748, 856229, 851413, 855593, 856523	1322	5	5045	3.81619	1	0.815962	0.804982
KEGG_PATHWAY	sce00920:Sulfur metabolism	9	0.573248	0.0185995	853602, 850588, 854090, 856296, 853869, 852143, 851010, 853466, 855444	613	15	2412	2.36085	0.884569	0.0898976	0.073623
GOTERM_BP_DIRECT	GO:0009435~NAD biosynthetic process	8	0.509554	0.0186513	850933, 853482, 854384, 850608, 852893, 853541, 850310, 852179	1492	12	5678	2.53709	1	0.570442	0.561075
GOTERM_BP_DIRECT	GO:0042908~xenobiotic transport	5	0.318471	0.0187337	852293, 853198, 855660, 856327, 854685	1492	5	5678	3.80563	1	0.570442	0.561075
GOTERM_BP_DIRECT	GO:0000032~cell wall mannoprotein biosynthetic process	11	0.700637	0.0194386	855703, 851832, 851504, 856054, 853935, 852094, 856675, 856057, 853302, 853256, 852498	1492	20	5678	2.0931	1	0.582203	0.572643
GOTERM_CC_DIRECT	GO:0071561~nucleus-vacuole junction	8	0.509554	0.0208857	855490, 850941, 856207, 850501, 852394, 850619, 856602, 850761	1529	13	6279	2.52714	0.999951	0.196325	0.180452
GOTERM_BP_DIRECT	GO:0006694~steroid biosynthetic process	13	0.828025	0.0224697	855003, 856597, 855441, 855242, 850790, 854412, 856767, 855029, 854014, 852872, 852883, 852951, 850886	1492	26	5678	1.90282	1	0.648718	0.638066
GOTERM_MF_DIRECT	GO:0000026~alpha-1,2-mannosyltransferase activity	9	0.573248	0.022671	852303, 855703, 852735, 856054, 853935, 852094, 853253, 853302, 852498	1322	15	5045	2.28971	1	0.898529	0.886437
GOTERM_MF_DIRECT	GO:0047834~D-threo-aldose 1-dehydrogenase activity	9	0.573248	0.022671	852446, 856504, 851974, 854287, 855057, 855385, 850471, 853620, 851354	1322	15	5045	2.28971	1	0.898529	0.886437
GOTERM_MF_DIRECT	GO:0070628~proteasome binding	9	0.573248	0.022671	851631, 850554, 855229, 852822, 851757, 850439, 851140, 855567, 850562	1322	15	5045	2.28971	1	0.898529	0.886437
GOTERM_BP_DIRECT	GO:0045053~protein retention in Golgi apparatus	9	0.573248	0.0230797	853393, 853868, 855739, 851978, 852394, 853287, 850619, 851135, 854235	1492	15	5678	2.28338	1	0.648718	0.638066
GOTERM_BP_DIRECT	GO:0043162~ubiquitin-dependent protein catabolic process via the multivesicular body sorting pathway	9	0.573248	0.0230797	854291, 853832, 850712, 853868, 856862, 853566, 851135, 856105, 851641	1492	15	5678	2.28338	1	0.648718	0.638066
GOTERM_BP_DIRECT	GO:0046835~carbohydrate phosphorylation	9	0.573248	0.0230797	853108, 852128, 850402, 855472, 850317, 852639, 850614, 853286, 854699	1492	15	5678	2.28338	1	0.648718	0.638066
GOTERM_BP_DIRECT	GO:0006879~cellular iron ion homeostasis	19	1.21019	0.0238266	856345, 851084, 855035, 854401, 856921, 856644, 853497, 855797, 852710, 855968, 851862, 854007, 851437, 850911, 851329, 852916, 850902, 850827, 850917	1492	44	5678	1.64334	1	0.656185	0.64541
GOTERM_BP_DIRECT	GO:0034727~piecemeal microautophagy of nucleus	18	1.1465	0.0240637	856162, 856389, 856004, 856576, 854412, 852200, 852222, 856602, 855983, 851431, 851585, 855741, 853872, 850432, 853416, 853138, 855954, 855937	1492	41	5678	1.67076	1	0.656185	0.64541
GOTERM_CC_DIRECT	GO:0034657~GID complex	6	0.382166	0.0242728	852402, 852624, 851842, 855166, 854710, 854795	1529	8	6279	3.07995	0.99999	0.223691	0.205605
GOTERM_MF_DIRECT	GO:0030674~protein binding, bridging	30	1.91083	0.0246283	854071, 855461, 854072, 852173, 855640, 851021, 854995, 852276, 851740, 851753, 854549, 851975, 850786, 854206, 850888, 854748, 850604, 856142, 854183, 854222, 856767, 854886, 856886, 854323, 851566, 850578, 851424, 851108, 851448, 851707	1322	79	5045	1.44919	1	0.915244	0.902928
GOTERM_MF_DIRECT	GO:0008121~ubiquinol-cytochrome-c reductase activity	7	0.44586	0.0246323	853273, 856321, 852142, 854231, 850593, 856689, 852235	1322	10	5045	2.67133	1	0.915244	0.902928
GOTERM_CC_DIRECT	GO:0005774~vacuolar membrane	56	3.56688	0.0258633	856350, 854094, 855261, 852230, 854412, 850296, 852596, 850574, 855983, 850772, 853679, 855858, 854648, 851697, 854007, 855739, 852948, 851815, 856088, 856162, 855113, 852200, 852485, 856644, 850782, 852998, 852878, 853261, 852092, 854394, 852097, 856855, 853345, 851685, 853388, 853267, 855840, 851434, 850544, 851875, 851713, 851878, 850908, 856345, 852063, 853991, 856387, 852189, 854721, 852785,…	1529	178	6279	1.29197	0.999996	0.233765	0.214865
GOTERM_BP_DIRECT	GO:0006878~cellular copper ion homeostasis	11	0.700637	0.0285598	852127, 852710, 856779, 853568, 856241, 855035, 854027, 853497, 852312, 851685, 850772	1492	21	5678	1.99343	1	0.756213	0.743796
GOTERM_BP_DIRECT	GO:0006633~fatty acid biosynthetic process	11	0.700637	0.0285598	852314, 852456, 850400, 855845, 855955, 852329, 851448, 852825, 851087, 856464, 853642	1492	21	5678	1.99343	1	0.756213	0.743796
KEGG_PATHWAY	sce00520:Amino sugar and nucleotide sugar metabolism	15	0.955414	0.0307405	855131, 853830, 850992, 851016, 854768, 853732, 852326, 852128, 851504, 850317, 852639, 850614, 855529, 854914, 853707	613	34	2412	1.73592	0.972419	0.140451	0.115024
GOTERM_MF_DIRECT	GO:0046873~metal ion transmembrane transporter activity	8	0.509554	0.0309015	853679, 851786, 853801, 852637, 850821, 854027, 852485, 854246	1322	13	5045	2.34842	1	1	0.987374
GOTERM_BP_DIRECT	GO:0034605~cellular response to heat	13	0.828025	0.031014	855170, 854980, 854104, 852364, 850385, 853563, 851631, 850532, 852423, 850633, 851845, 851646, 851800	1492	27	5678	1.83234	1	0.793847	0.780812
GOTERM_BP_DIRECT	GO:0006696~ergosterol biosynthetic process	13	0.828025	0.031014	853272, 855003, 856597, 856079, 855441, 855242, 850790, 856767, 855029, 852872, 852883, 852951, 853707	1492	27	5678	1.83234	1	0.793847	0.780812
KEGG_PATHWAY	sce00513:Various types of N-glycan biosynthesis	14	0.89172	0.0314804	856054, 853253, 852196, 856675, 856057, 853455, 853256, 855796, 856716, 852303, 851832, 852845, 856718, 850746	613	31	2412	1.77698	0.974738	0.140451	0.115024
GOTERM_BP_DIRECT	GO:0006099~tricarboxylic acid cycle	14	0.89172	0.0315121	854083, 851481, 854310, 854681, 850361, 856107, 853159, 855732, 850685, 850610, 853716, 851726, 851758, 853709	1492	30	5678	1.77596	1	0.793847	0.780812
GOTERM_MF_DIRECT	GO:0097573~glutathione oxidoreductase activity	6	0.382166	0.0330469	850322, 852302, 856048, 851551, 856921, 852124	1322	8	5045	2.86214	1	1	0.987374
GOTERM_BP_DIRECT	GO:0051156~glucose 6-phosphate metabolic process	6	0.382166	0.0334572	853732, 852128, 855131, 850317, 852639, 850614	1492	8	5678	2.85422	1	0.793847	0.780812
GOTERM_BP_DIRECT	GO:0000103~sulfate assimilation	6	0.382166	0.0334572	853602, 850588, 854090, 853869, 853466, 853123	1492	8	5678	2.85422	1	0.793847	0.780812
GOTERM_BP_DIRECT	GO:0071421~manganese ion transmembrane transport	6	0.382166	0.0334572	854916, 852709, 854027, 850917, 852485, 854246	1492	8	5678	2.85422	1	0.793847	0.780812
GOTERM_BP_DIRECT	GO:0051016~barbed-end actin filament capping	6	0.382166	0.0334572	854777, 852405, 855117, 853862, 850450, 852971	1492	8	5678	2.85422	1	0.793847	0.780812
GOTERM_BP_DIRECT	GO:2000601~positive regulation of Arp2/3 complex-mediated actin nucleation	6	0.382166	0.0334572	852536, 854353, 851051, 853729, 850450, 855136	1492	8	5678	2.85422	1	0.793847	0.780812
GOTERM_CC_DIRECT	GO:0030125~clathrin vesicle coat	5	0.318471	0.0341288	852666, 853589, 853077, 850903, 851392	1529	6	6279	3.42217	1	0.294156	0.270373
GOTERM_CC_DIRECT	GO:0030904~retromer complex	5	0.318471	0.0341288	853393, 853287, 856403, 854300, 854235	1529	6	6279	3.42217	1	0.294156	0.270373
GOTERM_CC_DIRECT	GO:0000328~fungal-type vacuole lumen	9	0.573248	0.0344225	851434, 852138, 856649, 853290, 850875, 855343, 856513, 856137, 853267	1529	17	6279	2.17409	1	0.294156	0.270373
GOTERM_MF_DIRECT	GO:0032934~sterol binding	9	0.573248	0.0351426	856480, 855490, 850501, 856389, 854412, 853882, 850761, 853366, 853872	1322	16	5045	2.14661	1	1	0.987374
GOTERM_MF_DIRECT	GO:0016773~phosphotransferase activity, alcohol group as acceptor	9	0.573248	0.0351426	853569, 853108, 852128, 850402, 855472, 850317, 852639, 850614, 850824	1322	16	5045	2.14661	1	1	0.987374
GOTERM_BP_DIRECT	GO:0006874~cellular calcium ion homeostasis	9	0.573248	0.035744	851610, 852324, 855131, 852878, 851609, 852709, 853570, 850917, 852485	1492	16	5678	2.14067	1	0.837233	0.823486
GOTERM_BP_DIRECT	GO:0006493~protein O-linked glycosylation	10	0.636943	0.0385912	852635, 853634, 856054, 856718, 853935, 852094, 851210, 853302, 855796, 852498	1492	19	5678	2.00296	1	0.85983	0.845711
GOTERM_BP_DIRECT	GO:1990961~drug transmembrane export	10	0.636943	0.0385912	853039, 854447, 856350, 852293, 856444, 855660, 854324, 854685, 852015, 851574	1492	19	5678	2.00296	1	0.85983	0.845711
GOTERM_BP_DIRECT	GO:0030968~endoplasmic reticulum unfolded protein response	10	0.636943	0.0385912	850500, 850513, 851978, 856366, 852233, 856425, 854149, 850583, 856424, 855411	1492	19	5678	2.00296	1	0.85983	0.845711
GOTERM_BP_DIRECT	GO:0009306~protein secretion	10	0.636943	0.0385912	852129, 851657, 851459, 850504, 855739, 854507, 856272, 856387, 853225, 856886	1492	19	5678	2.00296	1	0.85983	0.845711
GOTERM_MF_DIRECT	GO:0051536~iron-sulfur cluster binding	17	1.0828	0.0387404	855894, 856048, 854401, 851551, 856921, 856689, 853203, 852875, 855968, 853602, 850685, 852302, 852789, 853826, 854814, 853945, 855936	1322	40	5045	1.62188	1	1	0.987374
GOTERM_MF_DIRECT	GO:0005506~iron ion binding	11	0.700637	0.0395694	855968, 852951, 852789, 856180, 855021, 853826, 853482, 851551, 855029, 854401, 853047	1322	22	5045	1.90809	1	1	0.987374
KEGG_PATHWAY	sce00340:Histidine metabolism	8	0.509554	0.0408096	856804, 855206, 856044, 854690, 856782, 855205, 854556, 855137	613	14	2412	2.24843	0.9917	0.167279	0.136995
GOTERM_CC_DIRECT	GO:0005770~late endosome	13	0.828025	0.0416035	853261, 852394, 851261, 853287, 852066, 853884, 854256, 855631, 854763, 854246, 853502, 850619, 853906	1529	30	6279	1.77953	1	0.349172	0.320941
GOTERM_MF_DIRECT	GO:0061631~ubiquitin conjugating enzyme activity	7	0.44586	0.0423753	851631, 856704, 852822, 851757, 854517, 855036, 853034	1322	11	5045	2.42848	1	1	0.987374
GOTERM_BP_DIRECT	GO:0030026~cellular manganese ion homeostasis	7	0.44586	0.0429567	850411, 854094, 852709, 854027, 850917, 852485, 854246	1492	11	5678	2.42176	1	0.875128	0.860758
GOTERM_BP_DIRECT	GO:0045721~negative regulation of gluconeogenesis	7	0.44586	0.0429567	852402, 856704, 852624, 851842, 855166, 854710, 854795	1492	11	5678	2.42176	1	0.875128	0.860758
GOTERM_BP_DIRECT	GO:0070941~eisosome assembly	7	0.44586	0.0429567	854701, 853733, 852977, 856272, 856103, 855047, 855110	1492	11	5678	2.42176	1	0.875128	0.860758
KEGG_PATHWAY	sce00220:Arginine biosynthesis	9	0.573248	0.0430859	854557, 851237, 854096, 852507, 855084, 855993, 856411, 856800, 853357	613	17	2412	2.0831	0.993685	0.167279	0.136995
GOTERM_CC_DIRECT	GO:0005884~actin filament	6	0.382166	0.0438134	850504, 851707, 855117, 855645, 850450, 852971	1529	9	6279	2.73774	1	0.355452	0.326713
GOTERM_CC_DIRECT	GO:0032541~cortical endoplasmic reticulum	12	0.764331	0.0438643	856480, 851323, 855637, 850501, 854903, 856389, 852382, 852481, 854253, 850761, 853872, 854323	1529	27	6279	1.82516	1	0.355452	0.326713
KEGG_PATHWAY	sce00770:Pantothenate and CoA biosynthesis	11	0.700637	0.0439962	856804, 856615, 855955, 855206, 856044, 856460, 855034, 855205, 854556, 851069, 855137	613	23	2412	1.88184	0.99434	0.167279	0.136995
KEGG_PATHWAY	sce00330:Arginine and proline metabolism	11	0.700637	0.0439962	856804, 851158, 855206, 856044, 850833, 855993, 856432, 855034, 855205, 854556, 855137	613	23	2412	1.88184	0.99434	0.167279	0.136995
GOTERM_MF_DIRECT	GO:0042973~glucan endo-1,3-beta-D-glucosidase activity	5	0.318471	0.0440951	852856, 855804, 853199, 853196, 855352	1322	6	5045	3.18016	1	1	0.987374
GOTERM_MF_DIRECT	GO:0036402~proteasome-activating ATPase activity	5	0.318471	0.0440951	853712, 851557, 852834, 854433, 852003	1322	6	5045	3.18016	1	1	0.987374
GOTERM_MF_DIRECT	GO:0004362~glutathione-disulfide reductase activity	5	0.318471	0.0440951	850322, 852302, 856014, 851551, 852124	1322	6	5045	3.18016	1	1	0.987374
GOTERM_BP_DIRECT	GO:0042744~hydrogen peroxide catabolic process	5	0.318471	0.0445468	850799, 852979, 854980, 852064, 853940	1492	6	5678	3.17136	1	0.875128	0.860758
GOTERM_BP_DIRECT	GO:0006900~membrane budding	5	0.318471	0.0445468	850712, 852097, 853398, 853157, 856566	1492	6	5678	3.17136	1	0.875128	0.860758
GOTERM_BP_DIRECT	GO:1990822~basic amino acid transmembrane transport	5	0.318471	0.0445468	851697, 855113, 855453, 855451, 852596	1492	6	5678	3.17136	1	0.875128	0.860758
GOTERM_BP_DIRECT	GO:0034354~'de novo' NAD biosynthetic process from tryptophan	5	0.318471	0.0445468	850933, 853482, 850608, 853541, 852179	1492	6	5678	3.17136	1	0.875128	0.860758
GOTERM_BP_DIRECT	GO:0009102~biotin biosynthetic process	5	0.318471	0.0445468	856180, 855795, 855794, 855793, 853203	1492	6	5678	3.17136	1	0.875128	0.860758
GOTERM_BP_DIRECT	GO:0070814~hydrogen sulfide biosynthetic process	5	0.318471	0.0445468	853602, 850588, 856296, 853869, 853466	1492	6	5678	3.17136	1	0.875128	0.860758
GOTERM_BP_DIRECT	GO:1901800~positive regulation of proteasomal protein catabolic process	5	0.318471	0.0445468	853712, 851557, 852834, 854433, 852003	1492	6	5678	3.17136	1	0.875128	0.860758
GOTERM_BP_DIRECT	GO:0090158~endoplasmic reticulum membrane organization	5	0.318471	0.0445468	855637, 854903, 852382, 854253, 852186	1492	6	5678	3.17136	1	0.875128	0.860758
KEGG_PATHWAY	sce00010:Glycolysis / Gluconeogenesis	21	1.33758	0.0447038	856044, 855131, 853395, 855205, 851386, 852442, 853169, 854556, 855368, 855137, 853465, 851541, 856804, 853732, 855206, 852128, 852636, 850317, 852639, 850614, 854529	613	55	2412	1.50236	0.994801	0.167279	0.136995
GOTERM_CC_DIRECT	GO:0034270~CVT complex	4	0.254777	0.0470693	852721, 854071, 853758, 854072	1529	4	6279	4.10661	1	0.36871	0.338899
GOTERM_CC_DIRECT	GO:0005946~alpha,alpha-trehalose-phosphate synthase complex (UDP-forming)	4	0.254777	0.0470693	852423, 851646, 855303, 854872	1529	4	6279	4.10661	1	0.36871	0.338899
GOTERM_CC_DIRECT	GO:0000839~Hrd1p ubiquitin ligase ERAD-L complex	7	0.44586	0.0480839	852468, 855036, 850904, 852939, 854995, 854149, 851431	1529	12	6279	2.39552	1	0.370483	0.340529
GOTERM_MF_DIRECT	GO:0071949~FAD binding	8	0.509554	0.048133	856638, 853149, 854568, 854888, 850833, 851380, 853170, 852179	1322	14	5045	2.18068	1	1	0.987374
GOTERM_BP_DIRECT	GO:0016192~vesicle-mediated transport	51	3.24841	0.0484554	854092, 851261, 852230, 852079, 856876, 852666, 850400, 851259, 851459, 850767, 851657, 851418, 852826, 850604, 852828, 854261, 852083, 856367, 852243, 855237, 856886, 850782, 851742, 853800, 855869, 852830, 853963, 854935, 855827, 852715, 852290, 853461, 851364, 855645, 851487, 851960, 852129, 851996, 851677, 851833, 856140, 853077, 855056, 852780, 854242, 854201, 852785, 851203, 851566, 853942,…	1492	154	5678	1.26031	1	0.941787	0.926322
GOTERM_CC_DIRECT	GO:0005782~peroxisomal matrix	9	0.573248	0.0490843	852523, 853842, 854855, 855518, 851481, 856694, 854352, 853477, 850990	1529	18	6279	2.0533	1	0.372091	0.342007
GOTERM_CC_DIRECT	GO:0005856~cytoskeleton	48	3.05732	0.0504532	856294, 851085, 854431, 855640, 852099, 856277, 855584, 855645, 850450, 852276, 855048, 851585, 852971, 855345, 851532, 854549, 850323, 853856, 850367, 852984, 856648, 851359, 854700, 851996, 850504, 854748, 856409, 855630, 856862, 851051, 855771, 855117, 855557, 855711, 855634, 853037, 853433, 854223, 854289, 855478, 855136, 854713, 854777, 852536, 853528, 851904, 853729, 854819	1529	155	6279	1.27172	1	0.376397	0.345965
GOTERM_BP_DIRECT	GO:1904669~ATP export	9	0.573248	0.0523612	850712, 856021, 853868, 855739, 856387, 853566, 851135, 856105, 851641	1492	17	5678	2.01475	1	0.990536	0.974271
GOTERM_BP_DIRECT	GO:0042493~response to drug	9	0.573248	0.0523612	855490, 854193, 854183, 856862, 854324, 853126, 855457, 855005, 852015	1492	17	5678	2.01475	1	0.990536	0.974271
GOTERM_BP_DIRECT	GO:0042147~retrograde transport, endosome to Golgi	15	0.955414	0.05259	853393, 853287, 853890, 852079, 852035, 855237, 856403, 855016, 854300, 855983, 854235, 851445, 850767, 853827, 851714	1492	35	5678	1.63098	1	0.990536	0.974271
GOTERM_MF_DIRECT	GO:0051539~4 iron, 4 sulfur cluster binding	13	0.828025	0.0534795	856180, 855894, 854401, 853203, 852875, 855968, 853602, 850685, 852789, 853826, 854814, 853945, 855936	1322	29	5045	1.7107	1	1	0.987374
GOTERM_BP_DIRECT	GO:0009410~response to xenobiotic stimulus	10	0.636943	0.0542614	855490, 854193, 854183, 856862, 850470, 854324, 853126, 855457, 855005, 852015	1492	20	5678	1.90282	1	1	0.984118
GOTERM_BP_DIRECT	GO:0006812~cation transport	12	0.764331	0.0550996	851610, 851786, 851862, 850942, 855284, 851869, 854494, 851609, 852066, 853570, 853351, 850829	1492	26	5678	1.75644	1	1	0.984118
GOTERM_BP_DIRECT	GO:0032258~CVT pathway	19	1.21019	0.0570325	853261, 856162, 856004, 856576, 852200, 851135, 854201, 852785, 855983, 855741, 851445, 855825, 851532, 853416, 855625, 853942, 855954, 855949, 853758	1492	48	5678	1.5064	1	1	0.984118
GOTERM_MF_DIRECT	GO:0005324~long-chain fatty acid transporter activity	4	0.254777	0.0576346	853647, 855956, 852329, 854214	1322	4	5045	3.81619	1	1	0.987374
GOTERM_MF_DIRECT	GO:0015038~glutathione disulfide oxidoreductase activity	4	0.254777	0.0576346	850322, 852302, 851551, 852124	1322	4	5045	3.81619	1	1	0.987374
GOTERM_MF_DIRECT	GO:0008092~cytoskeletal protein binding	4	0.254777	0.0576346	850367, 851996, 852276, 855048	1322	4	5045	3.81619	1	1	0.987374
GOTERM_MF_DIRECT	GO:0003825~alpha,alpha-trehalose-phosphate synthase (UDP-forming) activity	4	0.254777	0.0576346	852423, 851646, 855303, 854872	1322	4	5045	3.81619	1	1	0.987374
GOTERM_MF_DIRECT	GO:0004805~trehalose-phosphatase activity	4	0.254777	0.0576346	852423, 851646, 855303, 854872	1322	4	5045	3.81619	1	1	0.987374
GOTERM_MF_DIRECT	GO:0003955~NAD(P)H dehydrogenase (quinone) activity	4	0.254777	0.0576346	850698, 855811, 850360, 851596	1322	4	5045	3.81619	1	1	0.987374
GOTERM_MF_DIRECT	GO:0004322~ferroxidase activity	4	0.254777	0.0576346	855080, 852117, 850502, 851437	1322	4	5045	3.81619	1	1	0.987374
GOTERM_BP_DIRECT	GO:0015908~fatty acid transport	4	0.254777	0.0580986	855956, 853367, 853882, 853366	1492	4	5678	3.80563	1	1	0.984118
GOTERM_BP_DIRECT	GO:0070413~trehalose metabolism in response to stress	4	0.254777	0.0580986	852423, 851646, 855303, 854872	1492	4	5678	3.80563	1	1	0.984118
GOTERM_BP_DIRECT	GO:0048268~clathrin coat assembly	4	0.254777	0.0580986	853077, 855478, 853157, 856566	1492	4	5678	3.80563	1	1	0.984118
GOTERM_BP_DIRECT	GO:0035308~negative regulation of protein dephosphorylation	4	0.254777	0.0580986	850553, 856534, 855565, 856236	1492	4	5678	3.80563	1	1	0.984118
GOTERM_MF_DIRECT	GO:0008157~protein phosphatase 1 binding	6	0.382166	0.0585745	850553, 855967, 856781, 854507, 850979, 852334	1322	9	5045	2.54413	1	1	0.987374
GOTERM_MF_DIRECT	GO:0042124~1,3-beta-glucanosyltransferase activity	6	0.382166	0.0585745	852856, 853199, 855255, 853196, 855352, 851056	1322	9	5045	2.54413	1	1	0.987374
GOTERM_MF_DIRECT	GO:0008198~ferrous iron binding	6	0.382166	0.0585745	855968, 851955, 851437, 853482, 854401, 853047	1322	9	5045	2.54413	1	1	0.987374
KEGG_PATHWAY	sce00052:Galactose metabolism	11	0.700637	0.0588674	853204, 853732, 854635, 852128, 855131, 850317, 852639, 850614, 853235, 854644, 853830	613	24	2412	1.80343	0.999067	0.213394	0.174762
GOTERM_BP_DIRECT	GO:0006081~cellular aldehyde metabolic process	6	0.382166	0.0592534	855385, 850471, 853620, 855368, 855137, 851354	1492	9	5678	2.53709	1	1	0.984118
GOTERM_BP_DIRECT	GO:0045807~positive regulation of endocytosis	6	0.382166	0.0592534	854170, 856294, 856862, 853077, 851086, 853274	1492	9	5678	2.53709	1	1	0.984118
GOTERM_BP_DIRECT	GO:0030437~ascospore formation	22	1.40127	0.0602855	855170, 854083, 856741, 856851, 856558, 852222, 854795, 856358, 852125, 856149, 852950, 855422, 851676, 856924, 854953, 851304, 855625, 851733, 852128, 852826, 855518, 851804	1492	58	5678	1.44351	1	1	0.984118
GOTERM_CC_DIRECT	GO:0000837~Doa10p ubiquitin ligase complex	5	0.318471	0.0644759	852468, 855036, 852939, 854995, 851431	1529	7	6279	2.93329	1	0.459147	0.422024
GOTERM_CC_DIRECT	GO:0019773~proteasome core complex, alpha-subunit complex	5	0.318471	0.0644759	854119, 854882, 854544, 853036, 853168	1529	7	6279	2.93329	1	0.459147	0.422024
GOTERM_CC_DIRECT	GO:0000136~alpha-1,6-mannosyltransferase complex	5	0.318471	0.0644759	851832, 852845, 856675, 856057, 853256	1529	7	6279	2.93329	1	0.459147	0.422024
GOTERM_MF_DIRECT	GO:0004806~triglyceride lipase activity	7	0.44586	0.0664067	850432, 852503, 855361, 855250, 851628, 854682, 853571	1322	12	5045	2.22611	1	1	0.987374
GOTERM_BP_DIRECT	GO:0006656~phosphatidylcholine biosynthetic process	7	0.44586	0.067262	853536, 855593, 853052, 850824, 853061, 855552, 856523	1492	12	5678	2.21995	1	1	0.984118
GOTERM_BP_DIRECT	GO:0006882~cellular zinc ion homeostasis	7	0.44586	0.067262	853679, 851786, 853568, 854052, 855284, 854160, 854494	1492	12	5678	2.21995	1	1	0.984118
GOTERM_CC_DIRECT	GO:0070469~respiratory chain	8	0.509554	0.0699303	853273, 856321, 852142, 854231, 853642, 850593, 856689, 852235	1529	16	6279	2.0533	1	0.490556	0.450894
GOTERM_BP_DIRECT	GO:0044255~cellular lipid metabolic process	8	0.509554	0.0714069	856010, 853717, 855361, 855250, 855630, 855201, 855682, 852476	1492	15	5678	2.02967	1	1	0.984118
GOTERM_BP_DIRECT	GO:0030001~metal ion transport	8	0.509554	0.0714069	853679, 851786, 853801, 852637, 850821, 852593, 854027, 854246	1492	15	5678	2.02967	1	1	0.984118
GOTERM_BP_DIRECT	GO:0000754~adaptation of signaling pathway by response to pheromone involved in conjugation with cellular fusion	8	0.509554	0.0714069	853644, 850578, 854383, 856394, 854946, 854183, 854032, 854797	1492	15	5678	2.02967	1	1	0.984118
GOTERM_BP_DIRECT	GO:0016042~lipid catabolic process	12	0.764331	0.0716585	850432, 852503, 854151, 855020, 853717, 855361, 851628, 854187, 854682, 856001, 853571, 855018	1492	27	5678	1.69139	1	1	0.984118
GOTERM_BP_DIRECT	GO:0006915~apoptotic process	12	0.764331	0.0716585	850698, 855669, 855932, 854745, 855811, 854372, 852716, 850538, 855980, 856584, 853465, 855411	1492	27	5678	1.69139	1	1	0.984118
GOTERM_MF_DIRECT	GO:0050661~NADP binding	9	0.573248	0.0721035	856161, 853172, 856460, 856581, 855480, 856014, 855441, 853395, 853465	1322	18	5045	1.90809	1	1	0.987374
GOTERM_BP_DIRECT	GO:0000920~cell separation after cytokinesis	9	0.573248	0.0732101	853646, 852515, 855804, 855529, 856861, 856546, 854223, 855389, 850992	1492	18	5678	1.90282	1	1	0.984118
GOTERM_BP_DIRECT	GO:0001403~invasive growth in response to glucose limitation	17	1.0828	0.0749745	856741, 856861, 851076, 855364, 855898, 851685, 852664, 850310, 856511, 855422, 852377, 850772, 856749, 854449, 852756, 852931, 851537	1492	43	5678	1.50455	1	1	0.984118
KEGG_PATHWAY	sce00190:Oxidative phosphorylation	27	1.71975	0.0783356	854893, 854695, 854231, 854077, 853642, 850593, 852177, 852235, 853585, 852688, 850685, 855857, 853853, 852327, 853716, 851758, 850727, 856884, 856321, 853273, 855176, 852142, 856448, 856689, 856027, 853709, 854919	613	79	2412	1.34479	0.999916	0.272143	0.222876
GOTERM_CC_DIRECT	GO:0005935~cellular bud neck	57	3.63057	0.0812022	854170, 852351, 854412, 852233, 852276, 850891, 854179, 852950, 856039, 856236, 850376, 851420, 855785, 852984, 854689, 851217, 851536, 854261, 851392, 850580, 855154, 851430, 852243, 856887, 855478, 852685, 852168, 856566, 851742, 856318, 855827, 851904, 856294, 855880, 853461, 853862, 850396, 855048, 850992, 854700, 850863, 852920, 853733, 852326, 851838, 855050, 856861, 851051, 855013, 856425,…	1529	194	6279	1.20658	1	0.561251	0.515873
GOTERM_MF_DIRECT	GO:0004620~phospholipase activity	5	0.318471	0.0818633	850432, 854151, 855020, 854187, 855018	1322	7	5045	2.72585	1	1	0.987374
GOTERM_MF_DIRECT	GO:0015036~disulfide oxidoreductase activity	5	0.318471	0.0818633	850444, 856048, 856921, 853123, 852124	1322	7	5045	2.72585	1	1	0.987374
GOTERM_MF_DIRECT	GO:0005315~inorganic phosphate transmembrane transporter activity	5	0.318471	0.0818633	852599, 856779, 854916, 853540, 853241	1322	7	5045	2.72585	1	1	0.987374
GOTERM_MF_DIRECT	GO:0046912~transferase activity, transferring acyl groups, acyl groups converted into alkyl on transfer	5	0.318471	0.0818633	851346, 855619, 850361, 856107, 855732	1322	7	5045	2.72585	1	1	0.987374
GOTERM_MF_DIRECT	GO:0005384~manganese ion transmembrane transporter activity	5	0.318471	0.0818633	854916, 854027, 850917, 852485, 854246	1322	7	5045	2.72585	1	1	0.987374
GOTERM_MF_DIRECT	GO:0005381~iron ion transmembrane transporter activity	5	0.318471	0.0818633	855080, 853926, 856888, 850917, 855369	1322	7	5045	2.72585	1	1	0.987374
KEGG_PATHWAY	sce00130:Ubiquinone and other terpenoid-quinone biosynthesis	6	0.382166	0.0821302	853170, 854057, 850360, 852341, 854930, 851596	613	10	2412	2.36085	0.999948	0.272143	0.222876
KEGG_PATHWAY	sce03450:Non-homologous end-joining	6	0.382166	0.0821302	851975, 855328, 852790, 854166, 850372, 850970	613	10	2412	2.36085	0.999948	0.272143	0.222876
GOTERM_BP_DIRECT	GO:0009051~pentose-phosphate shunt, oxidative branch	5	0.318471	0.0826383	855769, 853172, 850437, 855480, 853163	1492	7	5678	2.71831	1	1	0.984118
GOTERM_BP_DIRECT	GO:0043171~peptide catabolic process	5	0.318471	0.0826383	851557, 853699, 851105, 855682, 854797	1492	7	5678	2.71831	1	1	0.984118
GOTERM_BP_DIRECT	GO:0015802~basic amino acid transport	5	0.318471	0.0826383	851697, 855113, 855453, 855451, 852596	1492	7	5678	2.71831	1	1	0.984118
KEGG_PATHWAY	sce00310:Lysine degradation	8	0.509554	0.0844581	856804, 855206, 856044, 851726, 856079, 855205, 854556, 855137	613	16	2412	1.96737	0.999961	0.272143	0.222876
GOTERM_MF_DIRECT	GO:0004842~ubiquitin-protein transferase activity	24	1.52866	0.0853129	855041, 855036, 856862, 853034, 852583, 853494, 854149, 854886, 852793, 854710, 855147, 851631, 856704, 855724, 850786, 852822, 853832, 851424, 851842, 851757, 852736, 854517, 850904, 850949	1322	67	5045	1.36699	1	1	0.987374
GOTERM_BP_DIRECT	GO:0006506~GPI anchor biosynthetic process	13	0.828025	0.0879356	854772, 852044, 856008, 852796, 855324, 850376, 851896, 850411, 850777, 855928, 850305, 852735, 850628	1492	31	5678	1.59591	1	1	0.984118
GOTERM_MF_DIRECT	GO:0008234~cysteine-type peptidase activity	12	0.764331	0.0894596	850554, 854291, 850500, 855482, 854372, 856087, 855350, 853973, 856887, 851641, 850562, 852212	1322	28	5045	1.63551	1	1	0.987374
GOTERM_MF_DIRECT	GO:0000030~mannosyltransferase activity	12	0.764331	0.0894596	855703, 856050, 852458, 852735, 856054, 850305, 853935, 852094, 852196, 851210, 853302, 852498	1322	28	5045	1.63551	1	1	0.987374
GOTERM_BP_DIRECT	GO:0043086~negative regulation of catalytic activity	12	0.764331	0.0910701	854945, 856538, 851347, 852515, 853283, 854220, 855359, 856008, 850396, 850572, 854344, 856534	1492	28	5678	1.63098	1	1	0.984118
GOTERM_BP_DIRECT	GO:0006486~protein glycosylation	23	1.46497	0.0923199	856054, 852094, 853253, 852196, 856057, 853142, 853455, 851210, 853302, 855874, 853256, 855796, 852498, 856716, 852303, 855703, 852635, 853634, 854514, 851504, 856718, 850746, 853935	1492	64	5678	1.36765	1	1	0.984118
GOTERM_BP_DIRECT	GO:2000786~positive regulation of autophagosome assembly	6	0.382166	0.0935152	853416, 851339, 856162, 851421, 854179, 852685	1492	10	5678	2.28338	1	1	0.984118
GOTERM_BP_DIRECT	GO:0046686~response to cadmium ion	6	0.382166	0.0935152	852215, 851713, 855284, 855036, 855005, 853344	1492	10	5678	2.28338	1	1	0.984118
GOTERM_BP_DIRECT	GO:0006116~NADH oxidation	6	0.382166	0.0935152	851539, 854095, 854919, 854651, 855176, 852442	1492	10	5678	2.28338	1	1	0.984118
GOTERM_BP_DIRECT	GO:0000045~autophagosome assembly	11	0.700637	0.0939884	855825, 850941, 855954, 853261, 855937, 856162, 856576, 852222, 852200, 855741, 855983	1492	25	5678	1.67448	1	1	0.984118
GOTERM_BP_DIRECT	GO:0008202~steroid metabolic process	11	0.700637	0.0939884	852951, 850886, 855003, 856597, 855441, 855242, 854412, 856767, 855029, 852872, 852883	1492	25	5678	1.67448	1	1	0.984118
GOTERM_BP_DIRECT	GO:0016579~protein deubiquitination	11	0.700637	0.0939884	850554, 854291, 850500, 856021, 855350, 854066, 853973, 856887, 851641, 850562, 852212	1492	25	5678	1.67448	1	1	0.984118
GOTERM_MF_DIRECT	GO:0005516~calmodulin binding	10	0.636943	0.0950287	850950, 852467, 850544, 851996, 850568, 856088, 854946, 853077, 854144, 855771	1322	22	5045	1.73463	1	1	0.987374
GOTERM_BP_DIRECT	GO:0030148~sphingolipid biosynthetic process	10	0.636943	0.0965186	852456, 850400, 856050, 851644, 852458, 853307, 851087, 855342, 853927, 855880	1492	22	5678	1.72983	1	1	0.984118
GOTERM_CC_DIRECT	GO:0034271~phosphatidylinositol 3-kinase complex, class III, type I	4	0.254777	0.0965444	850941, 852394, 850908, 855983	1529	5	6279	3.28528	1	0.644836	0.5927
GOTERM_CC_DIRECT	GO:0030122~AP-2 adaptor complex	4	0.254777	0.0965444	854092, 856367, 853461, 852243	1529	5	6279	3.28528	1	0.644836	0.5927
GOTERM_MF_DIRECT	GO:0008483~transaminase activity	9	0.573248	0.0969816	856539, 851158, 856615, 854690, 850514, 852902, 855795, 853386, 851582	1322	19	5045	1.80767	1	1	0.987374
GOTERM_CC_DIRECT	GO:0031201~SNARE complex	11	0.700637	0.0974114	851203, 850767, 852780, 852230, 854242, 852079, 855237, 850782, 854201, 852785, 855785	1529	27	6279	1.67306	1	0.644836	0.5927
GOTERM_MF_DIRECT	GO:0052689~carboxylic ester hydrolase activity	8	0.509554	0.0978441	853007, 850788, 856010, 855250, 856474, 853477, 854454, 852476	1322	16	5045	1.90809	1	1	0.987374
GOTERM_MF_DIRECT	GO:0003755~peptidyl-prolyl cis-trans isomerase activity	8	0.509554	0.0978441	850433, 851733, 855762, 856454, 850914, 855951, 854653, 855587	1322	16	5045	1.90809	1	1	0.987374
GOTERM_BP_DIRECT	GO:0006873~cellular ion homeostasis	7	0.44586	0.098008	850553, 853644, 851413, 854946, 854441, 856601, 853522	1492	13	5678	2.04919	1	1	0.984118
GOTERM_BP_DIRECT	GO:0016237~lysosomal microautophagy	7	0.44586	0.098008	850544, 856088, 855949, 855739, 856387, 851663, 852685	1492	13	5678	2.04919	1	1	0.984118
GOTERM_BP_DIRECT	GO:0006635~fatty acid beta-oxidation	7	0.44586	0.098008	853647, 855956, 851481, 856079, 854352, 853477, 850990	1492	13	5678	2.04919	1	1	0.984118
GOTERM_BP_DIRECT	GO:0043248~proteasome assembly	9	0.573248	0.0983874	854735, 850554, 855229, 850611, 856607, 852471, 856355, 851461, 852037	1492	19	5678	1.80267	1	1	0.984118
GOTERM_BP_DIRECT	GO:0045324~late endosome to vacuole transport	9	0.573248	0.0983874	850712, 853868, 855739, 852394, 856389, 856387, 850619, 853906, 855983	1492	19	5678	1.80267	1	1	0.984118

## Sheet: 314 genes Metabolic pathways
11/11/2022 DAVID analysis of the Metabolic Pathways GO term of 314 genes but only 262 David IDs found
Category	Term	Count	%	PValue	Genes	List Total	Pop Hits	Pop Total	Fold Enrichment	Bonferroni	Benjamini	FDR
KEGG_PATHWAY	sce01100:Metabolic pathways	314	100	4.84481e-173	855384, 855021, 855383, 856597, 854057, 851582, 853642, 856910, 855029, 855149, 854845, 852303, 852423, 856229, 855034, 856800, 856008, 852442, 853775, 852323, 851596, 854856, 852314, 851346, 853768, 852559, 852317, 850933, 854190, 851481, 852691, 851360, 856014, 854077, 853664, 856018, 853541, 854872, 856137, 853536, 852688, 856804, 852446, 852327, 855955, 850940, 851237, 852326, 850941, 851910,…	314	797	2412	3.02635	4.40878e-171	4.45722e-171	2.27706e-171
KEGG_PATHWAY	sce01110:Biosynthesis of secondary metabolites	135	42.9936	1.11327e-40	854690, 856597, 854057, 856079, 851582, 855029, 855303, 855149, 851069, 853119, 856748, 852423, 850400, 856626, 856884, 855552, 852286, 854346, 852442, 856800, 854347, 856523, 851596, 851346, 852951, 851504, 852559, 852317, 851481, 856411, 855201, 852691, 851087, 855441, 850790, 855447, 855205, 854872, 856137, 855444, 853536, 853932, 856804, 850664, 851758, 851516, 855291, 853272, 851010, 852341,…	314	351	2412	2.95443	1.01308e-38	5.12106e-39	2.6162e-39
GOTERM_MF_DIRECT	GO:0016491~oxidoreductase activity	74	23.5669	4.80615e-29	855021, 851380, 854695, 856432, 853482, 855227, 851386, 855029, 851069, 854014, 852872, 850685, 856626, 856504, 854888, 852825, 850727, 853172, 856044, 853170, 855034, 856448, 852442, 856800, 856689, 850342, 852323, 851596, 852883, 852314, 853602, 856638, 852951, 852636, 856296, 855480, 851481, 856014, 855441, 850790, 855447, 855205, 853664, 854556, 853541, 855368, 853465, 852179, 852446, 852688,…	312	278	5045	4.30421	2.53284e-26	2.53284e-26	2.39346e-26
GOTERM_MF_DIRECT	GO:0016740~transferase activity	121	38.535	1.38595e-27	855384, 854690, 856597, 854057, 856079, 851582, 855149, 854699, 852303, 853119, 856748, 852423, 850400, 856229, 850402, 853253, 855795, 854346, 856800, 856523, 853256, 855796, 854856, 851346, 851504, 852559, 852317, 856092, 854190, 853386, 851087, 853142, 850310, 855444, 851753, 853536, 853932, 850664, 855955, 850940, 852326, 850941, 852845, 851910, 851516, 850824, 853272, 851010, 856782, 853830,…	312	734	5045	2.66561	7.30394e-25	3.65197e-25	3.45101e-25
GOTERM_MF_DIRECT	GO:0003824~catalytic activity	62	19.7452	7.01864e-20	854690, 851380, 853286, 856597, 855342, 855227, 855303, 854699, 853203, 855149, 856314, 851541, 856705, 852423, 850962, 856626, 850569, 851899, 855619, 852507, 854529, 852902, 855795, 856800, 856523, 851346, 853602, 856638, 853204, 851987, 852639, 850614, 850933, 856296, 855084, 851481, 856411, 852691, 853386, 854310, 852893, 852530, 855887, 854872, 850310, 856137, 853344, 851158, 850588, 851516,…	312	277	5045	3.61925	3.69882e-17	1.23294e-17	1.16509e-17
KEGG_PATHWAY	sce01240:Biosynthesis of cofactors	57	18.1529	1.57168e-18	855384, 855383, 854057, 853482, 854099, 854930, 855501, 853203, 852113, 853047, 853798, 850608, 856044, 853170, 856884, 855795, 855794, 855034, 854384, 854022, 856683, 854347, 852323, 851596, 853567, 851504, 852559, 851822, 850933, 855120, 852092, 856692, 852098, 855121, 852893, 855205, 853664, 855887, 854556, 853621, 853541, 855368, 852179, 853344, 856804, 850940, 852846, 851516, 850747, 856460,…	314	131	2412	3.34234	1.43023e-16	4.81982e-17	2.4623e-17
GOTERM_CC_DIRECT	GO:0005739~mitochondrion	124	39.4904	2.16483e-18	856597, 854057, 854695, 856079, 851582, 853642, 851069, 856748, 856229, 856884, 855795, 855552, 852286, 856800, 853775, 854347, 852323, 851596, 854856, 852314, 851346, 853768, 856638, 851628, 851481, 853386, 856014, 854077, 854231, 855447, 852177, 852179, 853536, 852688, 856804, 852327, 855955, 850940, 851237, 851758, 853273, 855176, 853395, 851254, 854644, 853159, 855732, 856027, 852215, 855845,…	306	1216	6279	2.09246	2.53285e-16	2.53285e-16	2.20813e-16
GOTERM_BP_DIRECT	GO:0006629~lipid metabolic process	42	13.3758	2.16953e-18	855361, 853061, 855003, 855201, 856597, 851087, 855441, 855342, 855242, 854495, 850790, 853642, 855029, 853288, 852872, 853536, 856748, 850400, 855955, 851413, 856229, 850824, 852825, 854808, 855593, 853272, 855552, 854682, 854346, 856523, 852883, 850432, 852314, 852951, 852456, 855845, 853941, 852317, 853307, 854419, 851628, 853927	310	155	5678	4.96308	1.12382e-15	1.12165e-15	9.7846e-16
GOTERM_BP_DIRECT	GO:0005975~carbohydrate metabolic process	34	10.828	1.91293e-17	855480, 851481, 853163, 852530, 851564, 856314, 856137, 850992, 851016, 856705, 853732, 852128, 850402, 850746, 854708, 855131, 853199, 856289, 852286, 850361, 856107, 853235, 854644, 855732, 855769, 853108, 853204, 851007, 854635, 852934, 850437, 850317, 852639, 850614	310	105	5678	5.93094	9.90896e-15	4.94492e-15	4.31365e-15
KEGG_PATHWAY	sce00500:Starch and sucrose metabolism	28	8.9172	2.65241e-15	855303, 854872, 851564, 856314, 856137, 856705, 853932, 852423, 850962, 853732, 852128, 852920, 850569, 854708, 855131, 853199, 856289, 852286, 853235, 853830, 854644, 853204, 851007, 854635, 851646, 850317, 852639, 850614	314	41	2412	5.24592	2.42473e-13	6.10055e-14	3.11659e-14
GOTERM_MF_DIRECT	GO:0016757~transferase activity, transferring glycosyl groups	28	8.9172	2.99418e-13	856054, 852196, 853142, 856314, 852303, 856705, 853932, 852423, 850962, 852008, 851832, 852326, 852920, 850569, 852845, 850608, 853253, 856289, 856782, 851210, 855874, 853256, 855796, 856716, 855928, 852735, 856718, 855529	312	85	5045	5.32655	1.57798e-10	3.94483e-11	3.72775e-11
KEGG_PATHWAY	sce00561:Glycerolipid metabolism	21	6.6879	5.43624e-11	856044, 855361, 856791, 854287, 855201, 854346, 855205, 854556, 855368, 855137, 856804, 850432, 853768, 854758, 853119, 856759, 853941, 855206, 854932, 854419, 851628	314	32	2412	5.041	4.94698e-09	1.00027e-09	5.11007e-10
KEGG_PATHWAY	sce01200:Carbon metabolism	40	12.7389	9.49008e-10	855480, 851481, 854310, 856079, 853163, 851582, 850295, 855227, 851386, 853169, 853465, 851541, 850685, 853119, 852128, 853716, 854529, 851758, 850747, 853172, 851010, 854681, 853395, 850361, 856107, 851254, 853159, 855732, 855769, 856814, 854932, 852934, 850437, 850514, 850317, 851726, 852639, 850614, 852979, 853709	314	112	2412	2.7434	8.63597e-08	1.45515e-08	7.4339e-09
GOTERM_BP_DIRECT	GO:0008652~cellular amino acid biosynthetic process	23	7.32484	2.09771e-09	855021, 854690, 854096, 856296, 855084, 856411, 852691, 856673, 851010, 856782, 856800, 853357, 850342, 851069, 855444, 852875, 851346, 856814, 850664, 856825, 856615, 855619, 853869	310	92	5678	4.57903	1.08661e-06	3.61505e-07	3.15355e-07
GOTERM_CC_DIRECT	GO:0005789~endoplasmic reticulum membrane	47	14.9682	7.04616e-09	853061, 852196, 855201, 856675, 856597, 851087, 855342, 856057, 855242, 853142, 850790, 855029, 856018, 855324, 853536, 851896, 856748, 850400, 851832, 856229, 850305, 852845, 850746, 852825, 850628, 855593, 852481, 855552, 852044, 853455, 856008, 851210, 854346, 855874, 852883, 856716, 854856, 852951, 852456, 853941, 850777, 855928, 852317, 852735, 853307, 854419, 853927	306	386	6279	2.4985	8.244e-07	4.122e-07	3.59354e-07
GOTERM_BP_DIRECT	GO:0008152~metabolic process	28	8.9172	9.39247e-09	855084, 856597, 855887, 852530, 855149, 851564, 856314, 856137, 850992, 850962, 850569, 852507, 850746, 854708, 853199, 851010, 852286, 856800, 853235, 854644, 856523, 853204, 855845, 851007, 854635, 852639, 850614, 850715	310	144	5678	3.56147	4.86529e-06	1.21398e-06	1.059e-06
GOTERM_CC_DIRECT	GO:0005743~mitochondrial inner membrane	35	11.1465	1.21945e-08	851380, 854057, 854695, 856432, 854231, 854077, 850593, 852177, 854930, 852235, 852994, 853585, 852688, 850685, 855857, 853853, 852327, 851413, 853716, 851758, 850727, 853170, 856884, 855552, 856321, 853273, 852142, 856448, 853775, 854347, 856689, 856027, 851822, 853709, 854919	306	241	6279	2.98003	1.42675e-06	4.75585e-07	4.14612e-07
GOTERM_MF_DIRECT	GO:0016620~oxidoreductase activity, acting on the aldehyde or oxo group of donors, NAD or NADP as acceptor	10	3.18471	4.13464e-08	856804, 855206, 856044, 856432, 853395, 855205, 856800, 854556, 855137, 853465	312	15	5045	10.7799	2.17893e-05	4.35791e-06	4.1181e-06
KEGG_PATHWAY	sce00380:Tryptophan metabolism	14	4.4586	7.76389e-08	856044, 853386, 856079, 853482, 855205, 854556, 853541, 855137, 852179, 856804, 855206, 851726, 850933, 852979	314	20	2412	5.37707	7.06512e-06	1.0204e-06	5.2129e-07		ID	Gene Name
GOTERM_BP_DIRECT	GO:0008654~phospholipid biosynthetic process	14	4.4586	9.07445e-08	855593, 853061, 855201, 855552, 854346, 853288, 856523, 853536, 856748, 853941, 856229, 851413, 852317, 850824	310	40	5678	6.41065	4.70045e-05	9.38298e-06	8.18515e-06		853482	3-hydroxyanthranilate 3,4-dioxygenase(BNA1)
GOTERM_MF_DIRECT	GO:0030170~pyridoxal phosphate binding	15	4.77707	9.38223e-08	855291, 854690, 852691, 855795, 853386, 856289, 855342, 851010, 850295, 855227, 856539, 851158, 850933, 852902, 850747	312	42	5045	5.77495	4.94432e-05	8.24073e-06	7.78725e-06		856079	acetyl-CoA C-acetyltransferase(ERG10)
GOTERM_BP_DIRECT	GO:0019363~pyridine nucleotide biosynthetic process	8	2.54777	1.37808e-07	852846, 850933, 853482, 854384, 850608, 852893, 850310, 852179	310	10	5678	14.6529	7.13821e-05	1.18745e-05	1.03586e-05		855206	aldehyde dehydrogenase (NAD(+)) ALD2(ALD2)
GOTERM_BP_DIRECT	GO:0005992~trehalose biosynthetic process	7	2.2293	1.65676e-07	852423, 853732, 855131, 851646, 855303, 853830, 854872	310	7	5678	18.3161	8.58166e-05	1.22364e-05	1.06743e-05		855205	aldehyde dehydrogenase (NAD(+)) ALD3(ALD3)
GOTERM_CC_DIRECT	GO:0005783~endoplasmic reticulum	63	20.0637	1.72271e-07	852196, 856675, 856597, 855342, 854495, 855029, 852872, 851896, 856748, 850400, 856229, 852825, 854808, 855593, 852481, 852044, 853455, 856008, 854346, 856523, 855874, 853256, 852883, 856716, 854856, 853768, 852951, 850777, 852317, 851822, 854419, 853927, 856054, 853061, 855201, 855003, 851087, 855441, 856057, 853142, 855242, 850790, 852530, 856018, 855324, 850992, 853536, 851832, 850305, 852845,…	306	663	6279	1.94983	2.01555e-05	5.03892e-06	4.39291e-06		856804	aldehyde dehydrogenase (NAD(P)(+)) ALD5(ALD5)
GOTERM_BP_DIRECT	GO:0006099~tricarboxylic acid cycle	12	3.82166	2.23842e-07	850685, 853716, 851726, 851758, 853709, 851481, 854310, 854681, 850361, 856107, 855732, 853159	310	30	5678	7.32645	0.000115944	1.44658e-05	1.26191e-05		854556	aldehyde dehydrogenase (NADP(+)) ALD4(ALD4)
KEGG_PATHWAY	sce00053:Ascorbate and aldarate metabolism	10	3.18471	4.07385e-07	852446, 856804, 854888, 855206, 856044, 855057, 855205, 854556, 855368, 855137	314	11	2412	6.98321	3.70714e-05	4.68493e-06	2.39339e-06		856044	aldehyde dehydrogenase (NADP(+)) ALD6(ALD6)
KEGG_PATHWAY	sce00620:Pyruvate metabolism	22	7.00637	5.35369e-07	856044, 851380, 851481, 856079, 852266, 855205, 851386, 852442, 854556, 855368, 855137, 854014, 852146, 856804, 851346, 856638, 855009, 851865, 855206, 855619, 852636, 854529	314	52	2412	3.24988	4.87174e-05	5.47266e-06	2.79582e-06		851726	alpha-ketoglutarate dehydrogenase KGD2(KGD2)
GOTERM_BP_DIRECT	GO:0006696~ergosterol biosynthetic process	11	3.50318	7.26617e-07	852951, 853272, 855003, 856597, 856079, 855441, 855242, 850790, 855029, 852872, 852883	310	27	5678	7.46213	0.000376317	4.17401e-05	3.64116e-05		852979	catalase T(CTT1)
GOTERM_BP_DIRECT	GO:0009435~NAD biosynthetic process	8	2.54777	8.26924e-07	850933, 853482, 854384, 850608, 852893, 853541, 850310, 852179	310	12	5678	12.2108	0.000428255	4.2752e-05	3.72943e-05		853541	dioxygenase BNA2(BNA2)
GOTERM_BP_DIRECT	GO:0006006~glucose metabolic process	10	3.18471	9.89417e-07	853732, 852128, 855131, 850317, 852639, 850614, 855480, 853286, 853395, 853465	310	22	5678	8.32551	0.000512387	4.65026e-05	4.05661e-05		855137	hexadecenal dehydrogenase(HFD1)
GOTERM_BP_DIRECT	GO:0005978~glycogen biosynthetic process	8	2.54777	1.70845e-06	853932, 856705, 853732, 850962, 855131, 850569, 853830, 856314	310	13	5678	11.2715	0.000884585	7.36056e-05	6.42092e-05		850933	kynureninase(BNA5)
GOTERM_MF_DIRECT	GO:0016798~hydrolase activity, acting on glycosyl bonds	14	4.4586	1.75403e-06	853199, 852286, 853235, 852530, 854644, 851564, 856314, 856137, 850992, 851007, 853204, 854635, 850746, 854708	312	45	5045	5.03063	0.000923947	0.000132053	0.000124787		852179	kynurenine 3-monooxygenase(BNA4)
GOTERM_CC_DIRECT	GO:0005750~mitochondrial respiratory chain complex III	7	2.2293	2.22764e-06	853273, 856321, 852142, 854231, 850593, 856689, 852235	306	10	6279	14.3637	0.0002606	5.21268e-05	4.54439e-05		853386	kynurenine--oxoglutarate transaminase(BNA3)
GOTERM_BP_DIRECT	GO:0009086~methionine biosynthetic process	11	3.50318	2.23479e-06	850664, 856825, 854090, 855021, 856296, 853869, 852691, 856673, 851010, 853466, 855444	310	30	5678	6.71591	0.00115695	8.88759e-05	7.753e-05		ID	Gene Name
KEGG_PATHWAY	sce00190:Oxidative phosphorylation	27	8.59873	2.53626e-06	854893, 854695, 854231, 854077, 853642, 850593, 852177, 852235, 853585, 852688, 850685, 855857, 853853, 852327, 853716, 851758, 850727, 856884, 856321, 853273, 855176, 852142, 856448, 856689, 856027, 853709, 854919	314	79	2412	2.62533	0.000230774	2.33336e-05	1.19204e-05		854090	3'(2'),5'-bisphosphate nucleotidase(MET22)
GOTERM_BP_DIRECT	GO:0006631~fatty acid metabolic process	12	3.82166	3.32773e-06	852523, 852314, 852456, 850400, 855845, 855955, 852825, 851087, 856464, 854495, 854808, 853642	310	38	5678	5.78404	0.00172228	0.000122888	0.0001072		856825	5-methyltetrahydropteroyltriglutamate-homocysteine S-methyltransferase(MET6)
KEGG_PATHWAY	sce00740:Riboflavin metabolism	11	3.50318	4.60739e-06	856625, 852390, 851537, 852559, 851822, 852408, 851516, 854022, 852098, 852389, 851299	314	16	2412	5.28105	0.000419185	3.85345e-05	1.96861e-05		850664	S-adenosylmethionine-homocysteine S-methyltransferase MHT1(MHT1)
GOTERM_CC_DIRECT	GO:0070469~respiratory chain	8	2.54777	4.66699e-06	853273, 856321, 852142, 854231, 853642, 850593, 856689, 852235	306	16	6279	10.2598	0.00054589	9.10062e-05	7.93388e-05		855021	acireductone dioxygenase (Ni2+-requiring)(ADI1)
GOTERM_BP_DIRECT	GO:0006694~steroid biosynthetic process	10	3.18471	5.1185e-06	852951, 855003, 856597, 855441, 855242, 850790, 855029, 854014, 852872, 852883	310	26	5678	7.04467	0.00264788	0.000176418	0.000153896		853869	adenylyl-sulfate kinase(MET14)
GOTERM_BP_DIRECT	GO:0046835~carbohydrate phosphorylation	8	2.54777	5.8259e-06	853108, 852128, 850402, 850317, 852639, 850614, 853286, 854699	310	15	5678	9.7686	0.00301327	0.000182444	0.000159153		851010	bifunctional cysteine synthase/O-acetylhomoserine aminocarboxypropyltransferase MET17(MET17)
GOTERM_BP_DIRECT	GO:0006486~protein glycosylation	15	4.77707	5.99912e-06	856054, 853253, 852196, 856057, 853142, 853455, 851210, 855874, 853256, 855796, 856716, 852303, 851504, 856718, 850746	310	64	5678	4.29284	0.00310273	0.000182444	0.000159153		852691	cystathionine beta-lyase STR3(STR3)
GOTERM_MF_DIRECT	GO:0016829~lyase activity	20	6.36943	6.84546e-06	855291, 855120, 856692, 855383, 856411, 852691, 855552, 851010, 856464, 852098, 850295, 855121, 856910, 853169, 853775, 854347, 852146, 852875, 855009, 851987	312	99	5045	3.26664	0.00360107	0.000450945	0.00042613		855444	homoserine O-acetyltransferase(MET2)
KEGG_PATHWAY	sce00010:Glycolysis / Gluconeogenesis	21	6.6879	6.99028e-06	856044, 855131, 853395, 855205, 851386, 852442, 853169, 854556, 855368, 855137, 853465, 851541, 856804, 853732, 855206, 852128, 852636, 850317, 852639, 850614, 854529	314	55	2412	2.93295	0.000635916	5.35922e-05	2.73786e-05		856296	phosphoadenylyl-sulfate reductase (thioredoxin)(MET16)
GOTERM_BP_DIRECT	GO:0006633~fatty acid biosynthetic process	9	2.86624	7.6739e-06	852314, 852456, 850400, 855845, 855955, 852825, 851087, 856464, 853642	310	21	5678	7.84977	0.00396721	0.000220412	0.000192274		856673	putative acireductone synthase UTR4(UTR4)
GOTERM_MF_DIRECT	GO:0008483~transaminase activity	9	2.86624	7.92174e-06	856539, 851158, 856615, 854690, 850514, 852902, 855795, 853386, 851582	312	19	5045	7.65941	0.00416607	0.000463862	0.000438336		853466	sulfate adenylyltransferase(MET3)
KEGG_PATHWAY	sce00071:Fatty acid degradation	12	3.82166	8.41614e-06	856804, 855206, 856044, 852636, 856079, 854495, 854808, 851386, 852442, 855205, 854556, 855137	314	20	2412	4.60892	0.000765579	5.95604e-05	3.04276e-05
GOTERM_MF_DIRECT	GO:0008121~ubiquinol-cytochrome-c reductase activity	7	2.2293	8.90073e-06	853273, 856321, 852142, 854231, 850593, 856689, 852235	312	10	5045	11.3189	0.00467972	0.000469068	0.000443256
GOTERM_BP_DIRECT	GO:0097502~mannosylation	10	3.18471	1.41865e-05	851832, 852845, 852735, 856054, 856718, 852196, 856675, 856057, 853256, 855796	310	29	5678	6.31591	0.00732173	0.000386023	0.000336743
GOTERM_BP_DIRECT	GO:1902600~hydrogen ion transmembrane transport	17	5.41401	1.6272e-05	854893, 854695, 856321, 853273, 852142, 854231, 850593, 856448, 856689, 852177, 852235, 853585, 856027, 852688, 852327, 853853, 850727	310	88	5678	3.53834	0.00839353	0.000420631	0.000366933
GOTERM_MF_DIRECT	GO:0046872~metal ion binding	78	24.8408	1.75698e-05	854090, 855384, 855021, 856791, 856079, 853482, 856673, 851386, 853169, 855029, 855501, 853203, 852235, 851069, 850574, 852113, 853047, 854845, 851016, 850685, 856825, 853798, 856626, 850402, 853716, 852507, 854529, 852825, 850605, 855593, 855993, 855794, 856321, 856683, 856448, 852442, 853775, 856689, 850342, 852875, 851346, 853602, 851865, 852636, 851987, 851822, 856092, 854190, 852092, 851360,…	312	799	5045	1.57854	0.00921664	0.000841754	0.000795434
KEGG_PATHWAY	sce00730:Thiamine metabolism	11	3.50318	1.97583e-05	856625, 855384, 852390, 851537, 852092, 854099, 855887, 853621, 852389, 853047, 851299	314	18	2412	4.69427	0.00179641	0.00012984	6.63314e-05
GOTERM_MF_DIRECT	GO:0016773~phosphotransferase activity, alcohol group as acceptor	8	2.54777	2.23159e-05	853569, 853108, 852128, 850402, 850317, 852639, 850614, 850824	312	16	5045	8.08494	0.0116917	0.000980042	0.000926111
KEGG_PATHWAY	sce00630:Glyoxylate and dicarboxylate metabolism	14	4.4586	2.24823e-05	851481, 856079, 851582, 850361, 856107, 855227, 851254, 855447, 855732, 852523, 853119, 850514, 850747, 852979	314	29	2412	3.70832	0.00204382	0.000137891	7.04446e-05
GOTERM_BP_DIRECT	GO:0051156~glucose 6-phosphate metabolic process	6	1.91083	2.26046e-05	853732, 852128, 855131, 850317, 852639, 850614	310	8	5678	13.7371	0.011641	0.000556504	0.000485461
GOTERM_CC_DIRECT	GO:0005811~lipid particle	13	4.14013	3.36067e-05	855361, 855201, 855003, 850790, 854495, 854682, 853395, 855137, 853465, 853768, 853941, 854419, 854808	306	62	6279	4.3025	0.00392433	0.000561712	0.000489698
GOTERM_BP_DIRECT	GO:0015986~ATP synthesis coupled proton transport	8	2.54777	3.77375e-05	855857, 853853, 852327, 854893, 854077, 852177, 853585, 856027	310	19	5678	7.71205	0.0193586	0.000886832	0.000773619
GOTERM_BP_DIRECT	GO:0006096~glycolytic process	9	2.86624	4.63526e-05	852128, 850317, 852639, 850614, 854529, 853395, 853169, 853465, 851541	310	26	5678	6.3402	0.0237252	0.00104193	0.000908915
KEGG_PATHWAY	sce00410:beta-Alanine metabolism	9	2.86624	5.26816e-05	856804, 855291, 855206, 856044, 852902, 855034, 855205, 854556, 855137	314	13	2412	5.31798	0.00478267	0.000289371	0.000147831
KEGG_PATHWAY	sce00513:Various types of N-glycan biosynthesis	14	4.4586	5.34708e-05	856054, 853253, 852196, 856675, 856057, 853455, 853256, 855796, 856716, 852303, 851832, 852845, 856718, 850746	314	31	2412	3.46908	0.00485415	0.000289371	0.000147831
GOTERM_MF_DIRECT	GO:0046933~proton-transporting ATP synthase activity, rotational mechanism	8	2.54777	5.57408e-05	855857, 853853, 852327, 854893, 854077, 852177, 853585, 856027	312	18	5045	7.18661	0.0289489	0.00225965	0.0021353
GOTERM_MF_DIRECT	GO:0016780~phosphotransferase activity, for other substituted phosphate groups	5	1.59236	6.74499e-05	856748, 856229, 851413, 855593, 856523	312	5	5045	16.1699	0.0349229	0.00253901	0.00239929
GOTERM_MF_DIRECT	GO:0000287~magnesium ion binding	14	4.4586	7.68109e-05	855131, 855794, 856673, 856782, 853169, 855501, 853159, 850342, 855845, 853732, 854326, 855955, 851987, 854529	312	62	5045	3.65126	0.0396725	0.00269862	0.00255012
GOTERM_BP_DIRECT	GO:0006122~mitochondrial electron transport, ubiquinol to cytochrome c	7	2.2293	8.15407e-05	855552, 853273, 856321, 852142, 854231, 850593, 856689	310	15	5678	8.54753	0.0413601	0.00168626	0.00147099
GOTERM_BP_DIRECT	GO:0006754~ATP biosynthetic process	7	2.2293	8.15407e-05	855857, 853853, 852327, 854893, 854077, 852177, 853585	310	15	5678	8.54753	0.0413601	0.00168626	0.00147099
KEGG_PATHWAY	sce00280:Valine, leucine and isoleucine degradation	9	2.86624	0.00010915	856804, 856615, 855206, 856044, 852902, 856079, 855205, 854556, 855137	314	14	2412	4.93813	0.00988406	0.00055788	0.000285004
GOTERM_BP_DIRECT	GO:0070814~hydrogen sulfide biosynthetic process	5	1.59236	0.000118302	853602, 850588, 856296, 853869, 853466	310	6	5678	15.2634	0.059444	0.00226527	0.00197608
GOTERM_BP_DIRECT	GO:0034354~'de novo' NAD biosynthetic process from tryptophan	5	1.59236	0.000118302	850933, 853482, 850608, 853541, 852179	310	6	5678	15.2634	0.059444	0.00226527	0.00197608
GOTERM_MF_DIRECT	GO:0004553~hydrolase activity, hydrolyzing O-glycosyl compounds	8	2.54777	0.000121938	856705, 851007, 853199, 854708, 852530, 854644, 856137, 850992	312	20	5045	6.46795	0.0622439	0.00401634	0.00379533
GOTERM_CC_DIRECT	GO:0005758~mitochondrial intermembrane space	15	4.77707	0.000138156	851380, 855176, 854022, 852098, 854231, 850593, 853775, 855732, 852177, 852323, 853585, 852688, 853798, 851628, 850727	306	93	6279	3.30961	0.0160354	0.00202053	0.00176149
KEGG_PATHWAY	sce01230:Biosynthesis of amino acids	32	10.1911	0.000164037	854096, 854690, 855084, 856411, 852691, 850295, 853169, 851069, 853465, 851541, 855444, 852113, 856825, 855619, 854529, 850747, 855993, 851010, 856782, 853395, 850361, 856107, 856800, 853357, 855732, 850342, 852875, 851346, 856814, 856615, 852934, 850877	314	125	2412	1.96647	0.0148177	0.000794283	0.000405775
GOTERM_CC_DIRECT	GO:0000136~alpha-1,6-mannosyltransferase complex	5	1.59236	0.000170076	851832, 852845, 856675, 856057, 853256	306	7	6279	14.6569	0.0197038	0.00221098	0.00192752
KEGG_PATHWAY	sce00230:Purine metabolism	19	6.05096	0.00017357	855131, 851360, 852143, 853466, 855149, 855501, 852644, 853569, 854845, 852008, 853732, 853798, 854326, 856626, 851899, 856608, 852408, 853869, 850715	314	57	2412	2.56051	0.0156721	0.00079842	0.000407888
GOTERM_BP_DIRECT	GO:0006506~GPI anchor biosynthetic process	9	2.86624	0.000184276	851896, 850777, 855928, 852735, 850305, 850628, 852044, 856008, 855324	310	31	5678	5.31759	0.0910485	0.00340252	0.00296815
KEGG_PATHWAY	sce00920:Sulfur metabolism	9	2.86624	0.000207724	853602, 850588, 854090, 856296, 853869, 852143, 851010, 853466, 855444	314	15	2412	4.60892	0.0187272	0.000910028	0.000464905
GOTERM_MF_DIRECT	GO:0016787~hydrolase activity	63	20.0637	0.000233566	854090, 852390, 856791, 853286, 853163, 856673, 855149, 856314, 854845, 851016, 855857, 854326, 856625, 851537, 851899, 852507, 850605, 853170, 855993, 852481, 852286, 853768, 856759, 851865, 853204, 850933, 851628, 853927, 855120, 855361, 852092, 855201, 851360, 855682, 852530, 856018, 855324, 851564, 850992, 856137, 852644, 852846, 856608, 852408, 850746, 854708, 853199, 852143, 854682, 852266,…	312	654	5045	1.55765	0.115828	0.00724056	0.00684212
GOTERM_BP_DIRECT	GO:0009058~biosynthetic process	9	2.86624	0.000234247	856539, 851504, 854690, 853386, 856597, 855342, 852893, 855444, 850310	310	32	5678	5.15141	0.11428	0.00417605	0.00364294
GOTERM_BP_DIRECT	GO:0009051~pentose-phosphate shunt, oxidative branch	5	1.59236	0.000264209	855769, 853172, 850437, 855480, 853163	310	7	5678	13.0829	0.127924	0.0042481	0.00370579
GOTERM_BP_DIRECT	GO:0006656~phosphatidylcholine biosynthetic process	6	1.91083	0.000266573	853536, 855593, 850824, 853061, 855552, 856523	310	12	5678	9.15806	0.128991	0.0042481	0.00370579
GOTERM_BP_DIRECT	GO:0009228~thiamine biosynthetic process	6	1.91083	0.000266573	855384, 855383, 854099, 855887, 853621, 853047	310	12	5678	9.15806	0.128991	0.0042481	0.00370579
GOTERM_BP_DIRECT	GO:0008202~steroid metabolic process	8	2.54777	0.000271155	852951, 855003, 856597, 855441, 855242, 855029, 852872, 852883	310	25	5678	5.86116	0.131057	0.0042481	0.00370579
KEGG_PATHWAY	sce00770:Pantothenate and CoA biosynthesis	11	3.50318	0.000282436	856804, 856615, 855955, 855206, 856044, 856460, 855034, 855205, 854556, 851069, 855137	314	23	2412	3.67377	0.0253777	0.00112974	0.000577151
KEGG_PATHWAY	sce00330:Arginine and proline metabolism	11	3.50318	0.000282436	856804, 851158, 855206, 856044, 850833, 855993, 856432, 855034, 855205, 854556, 855137	314	23	2412	3.67377	0.0253777	0.00112974	0.000577151
GOTERM_BP_DIRECT	GO:0009060~aerobic respiration	11	3.50318	0.000288593	850685, 852314, 855201, 853273, 856321, 852142, 852098, 850593, 856689, 854930, 852235	310	50	5678	4.02955	0.138872	0.00438831	0.0038281
GOTERM_MF_DIRECT	GO:0004029~aldehyde dehydrogenase (NAD) activity	6	1.91083	0.000292519	856804, 855206, 856044, 855205, 854556, 855137	312	11	5045	8.81993	0.142882	0.00856429	0.00809301
GOTERM_BP_DIRECT	GO:0006098~pentose-phosphate shunt	6	1.91083	0.000414003	855769, 853172, 852934, 850437, 855480, 853163	310	13	5678	8.4536	0.193053	0.00611541	0.00533472
GOTERM_MF_DIRECT	GO:0046912~transferase activity, transferring acyl groups, acyl groups converted into alkyl on transfer	5	1.59236	0.000427393	851346, 855619, 850361, 856107, 855732	312	7	5045	11.5499	0.201711	0.0118545	0.0112022
KEGG_PATHWAY	sce00052:Galactose metabolism	11	3.50318	0.000429259	853204, 853732, 854635, 852128, 855131, 850317, 852639, 850614, 853235, 854644, 853830	314	24	2412	3.5207	0.0383175	0.00164549	0.000840631
GOTERM_CC_DIRECT	GO:0005946~alpha,alpha-trehalose-phosphate synthase complex (UDP-forming)	4	1.27389	0.000437773	852423, 851646, 855303, 854872	306	4	6279	20.5196	0.0499405	0.00512194	0.00446528
GOTERM_BP_DIRECT	GO:0000103~sulfate assimilation	5	1.59236	0.000505813	853602, 850588, 854090, 853869, 853466	310	8	5678	11.4476	0.230549	0.00726404	0.00633672
GOTERM_MF_DIRECT	GO:0050661~NADP binding	7	2.2293	0.000515496	853172, 856460, 855480, 856014, 855441, 853395, 853465	312	18	5045	6.28828	0.237945	0.0135833	0.0128359
GOTERM_BP_DIRECT	GO:0070413~trehalose metabolism in response to stress	4	1.27389	0.000612947	852423, 851646, 855303, 854872	310	4	5678	18.3161	0.272109	0.00856469	0.00747132
KEGG_PATHWAY	sce00220:Arginine biosynthesis	9	2.86624	0.000619295	854557, 851237, 854096, 852507, 855084, 855993, 856411, 856800, 853357	314	17	2412	4.06669	0.0548138	0.00227901	0.00116428
GOTERM_BP_DIRECT	GO:0006487~protein N-linked glycosylation	10	3.18471	0.000687434	856716, 851832, 852845, 856054, 856675, 856057, 853142, 853455, 855874, 853256	310	46	5678	3.98177	0.299677	0.00935272	0.00815876
GOTERM_BP_DIRECT	GO:0016126~sterol biosynthetic process	8	2.54777	0.000729345	852951, 855003, 856597, 855441, 855242, 855029, 852872, 852883	310	29	5678	5.05273	0.314728	0.0096685	0.00843422
GOTERM_CC_DIRECT	GO:0042645~mitochondrial nucleoid	7	2.2293	0.000800182	851726, 854310, 854681, 850295, 854556, 852177, 851069	306	24	6279	5.98489	0.0894065	0.00851102	0.00741987
GOTERM_MF_DIRECT	GO:0003993~acid phosphatase activity	5	1.59236	0.00081339	856625, 852390, 851537, 852389, 851299	312	8	5045	10.1062	0.34873	0.0203016	0.0191845
GOTERM_BP_DIRECT	GO:0016310~phosphorylation	24	7.64331	0.000834759	856683, 854099, 855887, 853345, 856800, 854699, 850574, 851753, 853569, 853119, 853108, 853798, 852128, 850402, 850941, 854932, 851822, 851910, 850317, 852639, 850614, 853869, 850824, 854529	310	208	5678	2.1134	0.351171	0.0107893	0.00941191
KEGG_PATHWAY	sce00340:Histidine metabolism	8	2.54777	0.00088163	856804, 855206, 856044, 854690, 856782, 855205, 854556, 855137	314	14	2412	4.38944	0.077127	0.00311961	0.00159372
GOTERM_MF_DIRECT	GO:0004805~trehalose-phosphatase activity	4	1.27389	0.000886029	852423, 851646, 855303, 854872	312	4	5045	16.1699	0.37321	0.0203016	0.0191845
GOTERM_MF_DIRECT	GO:0003825~alpha,alpha-trehalose-phosphate synthase (UDP-forming) activity	4	1.27389	0.000886029	852423, 851646, 855303, 854872	312	4	5045	16.1699	0.37321	0.0203016	0.0191845
GOTERM_MF_DIRECT	GO:0050660~flavin adenine dinucleotide binding	8	2.54777	0.000960224	856638, 850588, 854888, 851380, 853170, 853709, 856014, 852179	312	27	5045	4.79107	0.397267	0.0210849	0.0199247
KEGG_PATHWAY	sce00100:Steroid biosynthesis	9	2.86624	0.000990564	852951, 855003, 856597, 855441, 855242, 850790, 855029, 852872, 852883	314	18	2412	3.84076	0.0862388	0.00337526	0.00172432
KEGG_PATHWAY	sce00564:Glycerophospholipid metabolism	14	4.4586	0.00103869	855593, 853061, 855201, 855552, 854682, 854346, 856523, 853536, 856748, 853941, 856229, 851413, 852317, 850824	314	40	2412	2.68854	0.0902355	0.00341282	0.00174351
GOTERM_MF_DIRECT	GO:0071949~FAD binding	6	1.91083	0.00108646	856638, 854888, 850833, 851380, 853170, 852179	312	14	5045	6.92995	0.436099	0.0229026	0.0216423
KEGG_PATHWAY	sce00020:Citrate cycle (TCA cycle)	12	3.82166	0.00111728	850685, 853716, 851726, 851758, 853709, 851481, 854310, 854681, 850361, 856107, 855732, 853159	314	31	2412	2.97349	0.096726	0.00354447	0.00181076
GOTERM_BP_DIRECT	GO:0006730~one-carbon metabolic process	6	1.91083	0.00122706	850877, 850747, 851582, 855227, 851254, 852113	310	16	5678	6.86855	0.470599	0.015473	0.0134977
GOTERM_BP_DIRECT	GO:0006526~arginine biosynthetic process	5	1.59236	0.00139073	854096, 855084, 856411, 856800, 853357	310	10	5678	9.15806	0.513685	0.0171192	0.0149338
KEGG_PATHWAY	sce00480:Glutathione metabolism	10	3.18471	0.00143625	854856, 852215, 851006, 853172, 855492, 855480, 850605, 856014, 856910, 853344	314	23	2412	3.3398	0.1226	0.00426242	0.00217754
KEGG_PATHWAY	sce01212:Fatty acid metabolism	10	3.18471	0.00143625	852314, 852456, 850400, 855845, 852825, 856079, 851087, 856464, 854495, 854808	314	23	2412	3.3398	0.1226	0.00426242	0.00217754
GOTERM_BP_DIRECT	GO:0000096~sulfur amino acid metabolic process	4	1.27389	0.00147056	850664, 853869, 853466, 855444	310	5	5678	14.6529	0.533414	0.0172791	0.0150733
GOTERM_BP_DIRECT	GO:0001678~cellular glucose homeostasis	4	1.27389	0.00147056	852128, 850317, 852639, 850614	310	5	5678	14.6529	0.533414	0.0172791	0.0150733
GOTERM_CC_DIRECT	GO:0005737~cytoplasm	149	47.4522	0.00169459	854690, 855021, 856079, 853482, 856910, 855303, 854699, 854845, 853119, 852423, 856626, 856504, 850402, 855795, 855794, 852286, 855034, 852442, 856800, 851596, 851346, 853768, 856638, 856759, 851865, 851504, 851987, 850933, 856092, 854190, 851481, 855201, 851360, 852691, 853386, 856014, 855682, 855447, 855205, 853664, 855324, 853541, 854872, 850310, 855444, 851753, 853932, 852446, 850664, 850941,…	306	2529	6279	1.20894	0.179987	0.0165222	0.014404
GOTERM_CC_DIRECT	GO:0045261~proton-transporting ATP synthase complex, catalytic core F(1)	4	1.27389	0.00203427	855857, 852327, 852177, 853585	306	6	6279	13.6797	0.211996	0.0183084	0.0159612
GOTERM_MF_DIRECT	GO:0008865~fructokinase activity	4	1.27389	0.0021139	852128, 850317, 852639, 850614	312	5	5045	12.9359	0.672151	0.0375741	0.0355065
GOTERM_MF_DIRECT	GO:0019158~mannokinase activity	4	1.27389	0.0021139	852128, 850317, 852639, 850614	312	5	5045	12.9359	0.672151	0.0375741	0.0355065
GOTERM_MF_DIRECT	GO:0004340~glucokinase activity	4	1.27389	0.0021139	852128, 850317, 852639, 850614	312	5	5045	12.9359	0.672151	0.0375741	0.0355065
GOTERM_MF_DIRECT	GO:0004396~hexokinase activity	4	1.27389	0.0021139	852128, 850317, 852639, 850614	312	5	5045	12.9359	0.672151	0.0375741	0.0355065
KEGG_PATHWAY	sce00270:Cysteine and methionine metabolism	14	4.4586	0.00219159	855021, 851481, 852691, 856673, 851010, 850295, 853344, 855444, 852113, 856814, 850664, 856825, 856615, 850877	314	43	2412	2.50096	0.180986	0.00628133	0.00320894
GOTERM_MF_DIRECT	GO:0016627~oxidoreductase activity, acting on the CH-CH group of donors	5	1.59236	0.00221024	853716, 853709, 855441, 853664, 852872	312	10	5045	8.08494	0.688416	0.0375741	0.0355065
GOTERM_MF_DIRECT	GO:0000009~alpha-1,6-mannosyltransferase activity	5	1.59236	0.00221024	851832, 852845, 856675, 856057, 853256	312	10	5045	8.08494	0.688416	0.0375741	0.0355065
KEGG_PATHWAY	sce00760:Nicotinate and nicotinamide metabolism	9	2.86624	0.00225308	854326, 856092, 854190, 852846, 852648, 854384, 850608, 852893, 850310	314	20	2412	3.45669	0.185566	0.00628133	0.00320894
GOTERM_BP_DIRECT	GO:0006520~cellular amino acid metabolic process	7	2.2293	0.00225506	854557, 851237, 855383, 851010, 850295, 855121, 853357	310	26	5678	4.93127	0.689459	0.0259081	0.0226007
KEGG_PATHWAY	sce00310:Lysine degradation	8	2.54777	0.00232862	856804, 855206, 856044, 851726, 856079, 855205, 854556, 855137	314	16	2412	3.84076	0.191158	0.00630096	0.00321897
KEGG_PATHWAY	sce00520:Amino sugar and nucleotide sugar metabolism	12	3.82166	0.00262977	851016, 853732, 852326, 852128, 855131, 851504, 850317, 852639, 850614, 855529, 853830, 850992	314	34	2412	2.71113	0.213077	0.00691255	0.00353141
GOTERM_BP_DIRECT	GO:0008615~pyridoxine biosynthetic process	4	1.27389	0.00282282	855120, 855383, 855121, 852323	310	6	5678	12.2108	0.768758	0.0310511	0.0270871
GOTERM_BP_DIRECT	GO:0006555~methionine metabolic process	4	1.27389	0.00282282	855021, 850877, 851010, 852113	310	6	5678	12.2108	0.768758	0.0310511	0.0270871
GOTERM_BP_DIRECT	GO:0046854~phosphatidylinositol phosphorylation	5	1.59236	0.00300539	851753, 854090, 850941, 853345, 850574	310	12	5678	7.63172	0.789682	0.0323705	0.0282381
GOTERM_MF_DIRECT	GO:0051287~NAD binding	7	2.2293	0.00340768	856814, 856092, 853395, 855447, 856800, 850342, 853465	312	25	5045	4.52756	0.834521	0.0561202	0.053032
GOTERM_CC_DIRECT	GO:0005749~mitochondrial respiratory chain complex II, succinate dehydrogenase complex (ubiquinone)	4	1.27389	0.00343241	850685, 853716, 851758, 853709	306	7	6279	11.7255	0.331208	0.0286851	0.0250075
GOTERM_BP_DIRECT	GO:0000032~cell wall mannoprotein biosynthetic process	6	1.91083	0.00363874	851832, 851504, 856054, 856675, 856057, 853256	310	20	5678	5.49484	0.848672	0.0383924	0.0334913
GOTERM_CC_DIRECT	GO:0005741~mitochondrial outer membrane	13	4.14013	0.00399636	855593, 855003, 856597, 850790, 854495, 854682, 855137, 852179, 854856, 856748, 853768, 854888, 856229	306	103	6279	2.58985	0.374067	0.0300838	0.0262269
GOTERM_MF_DIRECT	GO:0008177~succinate dehydrogenase (ubiquinone) activity	4	1.27389	0.00403528	850685, 853716, 851758, 853709	312	6	5045	10.7799	0.881269	0.0644423	0.0608961
GOTERM_CC_DIRECT	GO:0016020~membrane	110	35.0318	0.00411402	856597, 854057, 854695, 855029, 852303, 856748, 850400, 856229, 852825, 856884, 855552, 852044, 854346, 856008, 853775, 854347, 856523, 853256, 855796, 854856, 853768, 852951, 850777, 852317, 853927, 855201, 851087, 855441, 854077, 850790, 853142, 854231, 852177, 856018, 855324, 856137, 852179, 853536, 852688, 852327, 852326, 850941, 852845, 850305, 851758, 853273, 852341, 856027, 850432, 852456,…	306	1807	6279	1.24912	0.382659	0.0300838	0.0262269
GOTERM_BP_DIRECT	GO:0009082~branched-chain amino acid biosynthetic process	5	1.59236	0.00415711	852875, 856615, 855619, 851069, 850342	310	13	5678	7.04467	0.884429	0.0429845	0.0374971
GOTERM_BP_DIRECT	GO:0009098~leucine biosynthetic process	4	1.27389	0.00474178	852875, 856615, 855619, 850342	310	7	5678	10.4664	0.914743	0.0445728	0.0388826
GOTERM_BP_DIRECT	GO:0009231~riboflavin biosynthetic process	4	1.27389	0.00474178	852559, 851822, 854022, 852098	310	7	5678	10.4664	0.914743	0.0445728	0.0388826
GOTERM_BP_DIRECT	GO:0006646~phosphatidylethanolamine biosynthetic process	4	1.27389	0.00474178	856748, 850824, 855552, 856523	310	7	5678	10.4664	0.914743	0.0445728	0.0388826
GOTERM_BP_DIRECT	GO:0019433~triglyceride catabolic process	4	1.27389	0.00474178	853768, 855361, 851628, 854682	310	7	5678	10.4664	0.914743	0.0445728	0.0388826
GOTERM_BP_DIRECT	GO:0006000~fructose metabolic process	4	1.27389	0.00474178	852639, 850614, 853286, 854699	310	7	5678	10.4664	0.914743	0.0445728	0.0388826
KEGG_PATHWAY	sce00130:Ubiquinone and other terpenoid-quinone biosynthesis	6	1.91083	0.0051508	853170, 854057, 850360, 852341, 854930, 851596	314	10	2412	4.60892	0.374957	0.0131632	0.00672466
GOTERM_BP_DIRECT	GO:0030148~sphingolipid biosynthetic process	6	1.91083	0.00565136	852456, 850400, 853307, 851087, 855342, 853927	310	22	5678	4.99531	0.946907	0.0521741	0.0455136
GOTERM_MF_DIRECT	GO:0016874~ligase activity	14	4.4586	0.00611986	854096, 854310, 855794, 854384, 854495, 855501, 853159, 852994, 853344, 852523, 850940, 853567, 852507, 854808	312	97	5045	2.3338	0.960643	0.0892582	0.0843464
GOTERM_MF_DIRECT	GO:0010181~FMN binding	6	1.91083	0.00619466	853602, 850588, 850360, 852341, 852323, 851596	312	20	5045	4.85096	0.962173	0.0892582	0.0843464
GOTERM_MF_DIRECT	GO:0020037~heme binding	7	2.2293	0.00620053	853602, 851758, 852825, 852979, 854231, 855029, 853541	312	28	5045	4.04247	0.962291	0.0892582	0.0843464
GOTERM_MF_DIRECT	GO:0016301~kinase activity	24	7.64331	0.0062667	856683, 854099, 855887, 853345, 856800, 854699, 850574, 851753, 853569, 853119, 853108, 853798, 852128, 850402, 850941, 854932, 851822, 851910, 850317, 852639, 850614, 853869, 850824, 854529	312	215	5045	1.80501	0.963591	0.0892582	0.0843464
GOTERM_BP_DIRECT	GO:0009229~thiamine diphosphate biosynthetic process	4	1.27389	0.00728337	855384, 854099, 855887, 853621	310	8	5678	9.15806	0.977327	0.0627583	0.0547466
GOTERM_BP_DIRECT	GO:0042823~pyridoxal phosphate biosynthetic process	4	1.27389	0.00728337	855120, 855383, 856683, 855121	310	8	5678	9.15806	0.977327	0.0627583	0.0547466
GOTERM_BP_DIRECT	GO:0019318~hexose metabolic process	4	1.27389	0.00728337	852128, 850317, 852639, 850614	310	8	5678	9.15806	0.977327	0.0627583	0.0547466
GOTERM_BP_DIRECT	GO:0005987~sucrose catabolic process	4	1.27389	0.00728337	853204, 854635, 853235, 854644	310	8	5678	9.15806	0.977327	0.0627583	0.0547466
GOTERM_BP_DIRECT	GO:0046323~glucose import	3	0.955414	0.00853821	850317, 852639, 850614	310	3	5678	18.3161	0.988225	0.0639747	0.0558077
GOTERM_BP_DIRECT	GO:0005993~trehalose catabolic process	3	0.955414	0.00853821	852286, 851564, 856137	310	3	5678	18.3161	0.988225	0.0639747	0.0558077
GOTERM_BP_DIRECT	GO:0019805~quinolinate biosynthetic process	3	0.955414	0.00853821	850933, 853482, 852179	310	3	5678	18.3161	0.988225	0.0639747	0.0558077
GOTERM_BP_DIRECT	GO:0005980~glycogen catabolic process	3	0.955414	0.00853821	856289, 854708, 856314	310	3	5678	18.3161	0.988225	0.0639747	0.0558077
GOTERM_BP_DIRECT	GO:0097053~L-kynurenine catabolic process	3	0.955414	0.00853821	856539, 850933, 853386	310	3	5678	18.3161	0.988225	0.0639747	0.0558077
GOTERM_BP_DIRECT	GO:0019388~galactose catabolic process	3	0.955414	0.00853821	853732, 856504, 855131	310	3	5678	18.3161	0.988225	0.0639747	0.0558077
GOTERM_BP_DIRECT	GO:0043420~anthranilate metabolic process	3	0.955414	0.00853821	850933, 853482, 852179	310	3	5678	18.3161	0.988225	0.0639747	0.0558077
GOTERM_BP_DIRECT	GO:0019379~sulfate assimilation, phosphoadenylyl sulfate reduction by phosphoadenylyl-sulfate reductase (thioredoxin)	3	0.955414	0.00853821	856296, 853869, 853466	310	3	5678	18.3161	0.988225	0.0639747	0.0558077
GOTERM_BP_DIRECT	GO:0019464~glycine decarboxylation via glycine cleavage system	3	0.955414	0.00853821	851582, 855227, 851254	310	3	5678	18.3161	0.988225	0.0639747	0.0558077
GOTERM_MF_DIRECT	GO:0005536~glucose binding	4	1.27389	0.0102979	852128, 850317, 852639, 850614	312	8	5045	8.08494	0.995726	0.133609	0.126257
GOTERM_MF_DIRECT	GO:0004575~sucrose alpha-glucosidase activity	4	1.27389	0.0102979	853204, 854635, 853235, 854644	312	8	5045	8.08494	0.995726	0.133609	0.126257
GOTERM_BP_DIRECT	GO:0019509~L-methionine salvage from methylthioadenosine	4	1.27389	0.0104893	856539, 856615, 855021, 856673	310	9	5678	8.1405	0.995756	0.0753187	0.0657035
GOTERM_BP_DIRECT	GO:0006569~tryptophan catabolic process	4	1.27389	0.0104893	851987, 850933, 853482, 852179	310	9	5678	8.1405	0.995756	0.0753187	0.0657035
GOTERM_BP_DIRECT	GO:0006537~glutamate biosynthetic process	4	1.27389	0.0104893	854557, 851237, 850833, 856432	310	9	5678	8.1405	0.995756	0.0753187	0.0657035
KEGG_PATHWAY	sce00563:Glycosylphosphatidylinositol (GPI)-anchor biosynthesis	9	2.86624	0.0107749	851896, 850777, 855928, 852735, 850305, 850628, 852044, 856008, 855324	314	25	2412	2.76535	0.626873	0.0259103	0.0132368
KEGG_PATHWAY	sce01210:2-Oxocarboxylic acid metabolism	11	3.50318	0.0107902	852875, 851346, 856615, 855619, 855084, 850361, 856107, 856800, 855732, 851069, 850342	314	35	2412	2.41419	0.627399	0.0259103	0.0132368
GOTERM_MF_DIRECT	GO:0043878~glyceraldehyde-3-phosphate dehydrogenase (NAD+) (non-phosphorylating) activity	3	0.955414	0.0109017	855206, 855205, 855137	312	3	5045	16.1699	0.996901	0.133609	0.126257
GOTERM_MF_DIRECT	GO:0004108~citrate (Si)-synthase activity	3	0.955414	0.0109017	850361, 856107, 855732	312	3	5045	16.1699	0.996901	0.133609	0.126257
GOTERM_MF_DIRECT	GO:0004555~alpha,alpha-trehalase activity	3	0.955414	0.0109017	852286, 851564, 856137	312	3	5045	16.1699	0.996901	0.133609	0.126257
GOTERM_MF_DIRECT	GO:0004030~aldehyde dehydrogenase [NAD(P)+] activity	3	0.955414	0.0109017	856804, 856044, 854556	312	3	5045	16.1699	0.996901	0.133609	0.126257
KEGG_PATHWAY	sce00260:Glycine, serine and threonine metabolism	10	3.18471	0.0109837	856748, 853119, 856814, 850514, 850747, 851582, 850295, 855227, 851254, 851541	314	30	2412	2.56051	0.633973	0.0259103	0.0132368
GOTERM_BP_DIRECT	GO:0006749~glutathione metabolic process	5	1.59236	0.0116465	854856, 855009, 851006, 855492, 856014	310	17	5678	5.3871	0.997685	0.0824829	0.0719532
KEGG_PATHWAY	sce00062:Fatty acid elongation	5	1.59236	0.012696	852314, 852456, 850400, 851087, 853477	314	8	2412	4.80096	0.687369	0.0291152	0.0148741
GOTERM_CC_DIRECT	GO:0005759~mitochondrial matrix	14	4.4586	0.0128874	855084, 856432, 854681, 850361, 856107, 856800, 854556, 855732, 854930, 856804, 852314, 856615, 850833, 854919	306	134	6279	2.14384	0.780767	0.0859356	0.0749182
KEGG_PATHWAY	sce00290:Valine, leucine and isoleucine biosynthesis	6	1.91083	0.0129753	852875, 856615, 855619, 850295, 851069, 850342	314	12	2412	3.84076	0.695315	0.0291152	0.0148741
GOTERM_CC_DIRECT	GO:0005960~glycine cleavage complex	3	0.955414	0.0132209	851582, 855227, 851254	306	4	6279	15.3897	0.789265	0.0859356	0.0749182
GOTERM_CC_DIRECT	GO:0045263~proton-transporting ATP synthase complex, coupling factor F(o)	4	1.27389	0.0139968	853853, 854893, 854077, 856027	306	11	6279	7.46168	0.807794	0.0861905	0.0751405
GOTERM_BP_DIRECT	GO:0019344~cysteine biosynthetic process	4	1.27389	0.0143886	856296, 853869, 851010, 853466	310	10	5678	7.32645	0.999451	0.0966094	0.0842763
GOTERM_BP_DIRECT	GO:0015940~pantothenate biosynthetic process	4	1.27389	0.0143886	855206, 856460, 855034, 855205	310	10	5678	7.32645	0.999451	0.0966094	0.0842763
GOTERM_BP_DIRECT	GO:0006119~oxidative phosphorylation	4	1.27389	0.0143886	852688, 854695, 850727, 856448	310	10	5678	7.32645	0.999451	0.0966094	0.0842763
GOTERM_BP_DIRECT	GO:0006491~N-glycan processing	4	1.27389	0.0143886	852845, 856718, 850746, 852530	310	10	5678	7.32645	0.999451	0.0966094	0.0842763
GOTERM_BP_DIRECT	GO:0019413~acetate biosynthetic process	3	0.955414	0.0164635	856804, 856044, 854556	310	4	5678	13.7371	0.999816	0.1038	0.0905491
GOTERM_BP_DIRECT	GO:0006740~NADPH regeneration	3	0.955414	0.0164635	856044, 855480, 854556	310	4	5678	13.7371	0.999816	0.1038	0.0905491
GOTERM_BP_DIRECT	GO:0006546~glycine catabolic process	3	0.955414	0.0164635	851582, 855227, 851254	310	4	5678	13.7371	0.999816	0.1038	0.0905491
GOTERM_BP_DIRECT	GO:0006011~UDP-glucose metabolic process	3	0.955414	0.0164635	853732, 855131, 853830	310	4	5678	13.7371	0.999816	0.1038	0.0905491
GOTERM_BP_DIRECT	GO:0030497~fatty acid elongation	3	0.955414	0.0164635	852456, 850400, 851087	310	4	5678	13.7371	0.999816	0.1038	0.0905491
GOTERM_CC_DIRECT	GO:0000276~mitochondrial proton-transporting ATP synthase complex, coupling factor F(o)	4	1.27389	0.018002	853853, 854893, 854077, 856027	306	12	6279	6.83987	0.880618	0.105312	0.0918102
GOTERM_BP_DIRECT	GO:0019752~carboxylic acid metabolic process	4	1.27389	0.0189997	851346, 855291, 855619, 851481	310	11	5678	6.66041	0.999952	0.118348	0.103239
GOTERM_MF_DIRECT	GO:1904408~melatonin binding	4	1.27389	0.0201244	854529, 853395, 853169, 853465	312	10	5045	6.46795	0.999978	0.234542	0.221635
GOTERM_MF_DIRECT	GO:0016746~transferase activity, transferring acyl groups	11	3.50318	0.0205178	850940, 855845, 853941, 851006, 851726, 855084, 854419, 856079, 855342, 854346, 855444	312	78	5045	2.28037	0.999982	0.234542	0.221635
GOTERM_MF_DIRECT	GO:0017057~6-phosphogluconolactonase activity	3	0.955414	0.0209174	855769, 850437, 853163	312	4	5045	12.1274	0.999985	0.234542	0.221635
GOTERM_MF_DIRECT	GO:0033721~aldehyde dehydrogenase (NADP+) activity	3	0.955414	0.0209174	856804, 856044, 854556	312	4	5045	12.1274	0.999985	0.234542	0.221635
KEGG_PATHWAY	sce00030:Pentose phosphate pathway	9	2.86624	0.0218564	855769, 853732, 850402, 855131, 853172, 852934, 850437, 855480, 853163	314	28	2412	2.46906	0.866144	0.0465942	0.0238035
KEGG_PATHWAY	sce01250:Biosynthesis of nucleotide sugars	8	2.54777	0.0222842	853732, 852128, 855131, 851504, 850317, 852639, 850614, 853830	314	23	2412	2.67184	0.871367	0.0465942	0.0238035
KEGG_PATHWAY	sce00051:Fructose and mannose metabolism	8	2.54777	0.0222842	854932, 852128, 851504, 850317, 852639, 850614, 853286, 854699	314	23	2412	2.67184	0.871367	0.0465942	0.0238035
GOTERM_MF_DIRECT	GO:0009055~electron carrier activity	5	1.59236	0.0262763	850685, 853716, 852825, 853709, 854231	312	19	5045	4.25523	0.999999	0.288492	0.272617
GOTERM_BP_DIRECT	GO:0006657~CDP-choline pathway	3	0.955414	0.0264588	855593, 850824, 856523	310	5	5678	10.9897	0.999999	0.15906	0.138755
GOTERM_BP_DIRECT	GO:0006751~glutathione catabolic process	3	0.955414	0.0264588	851006, 850605, 856910	310	5	5678	10.9897	0.999999	0.15906	0.138755
GOTERM_BP_DIRECT	GO:0006013~mannose metabolic process	3	0.955414	0.0264588	850317, 852639, 850614	310	5	5678	10.9897	0.999999	0.15906	0.138755
GOTERM_BP_DIRECT	GO:0045333~cellular respiration	4	1.27389	0.0303833	850685, 853716, 851758, 853709	310	13	5678	5.63573	1	0.180554	0.157504
KEGG_PATHWAY	sce01040:Biosynthesis of unsaturated fatty acids	5	1.59236	0.0308162	852456, 850400, 852825, 851087, 853477	314	10	2412	3.84076	0.942063	0.0630021	0.0321859
GOTERM_MF_DIRECT	GO:0016811~hydrolase activity, acting on carbon-nitrogen (but not peptide) bonds, in linear amides	3	0.955414	0.033453	852481, 856018, 855324	312	5	5045	9.70192	1	0.344916	0.325935
GOTERM_MF_DIRECT	GO:0008061~chitin binding	3	0.955414	0.033453	851016, 853199, 850992	312	5	5045	9.70192	1	0.344916	0.325935
GOTERM_MF_DIRECT	GO:0004806~triglyceride lipase activity	4	1.27389	0.0336681	850432, 855361, 851628, 854682	312	12	5045	5.38996	1	0.344916	0.325935
GOTERM_MF_DIRECT	GO:0016616~oxidoreductase activity, acting on the CH-OH group of donors, NAD or NADP as acceptor	7	2.2293	0.0340334	856814, 851481, 855447, 854014, 855368, 850342, 852883	312	40	5045	2.82973	1	0.344916	0.325935
GOTERM_BP_DIRECT	GO:0022900~electron transport chain	4	1.27389	0.0371496	852825, 853709, 850727, 852235	310	14	5678	5.23318	1	0.203576	0.177588
GOTERM_BP_DIRECT	GO:0006744~ubiquinone biosynthetic process	4	1.27389	0.0371496	853170, 854057, 854930, 855137	310	14	5678	5.23318	1	0.203576	0.177588
GOTERM_BP_DIRECT	GO:0042819~vitamin B6 biosynthetic process	3	0.955414	0.0382767	855120, 855383, 855121	310	6	5678	9.15806	1	0.203576	0.177588
GOTERM_BP_DIRECT	GO:0042542~response to hydrogen peroxide	3	0.955414	0.0382767	855480, 852979, 853344	310	6	5678	9.15806	1	0.203576	0.177588
GOTERM_BP_DIRECT	GO:0006796~phosphate-containing compound metabolic process	3	0.955414	0.0382767	852390, 852389, 851299	310	6	5678	9.15806	1	0.203576	0.177588
GOTERM_BP_DIRECT	GO:0006672~ceramide metabolic process	3	0.955414	0.0382767	854419, 852481, 856018	310	6	5678	9.15806	1	0.203576	0.177588
GOTERM_BP_DIRECT	GO:0044262~cellular carbohydrate metabolic process	3	0.955414	0.0382767	852446, 852423, 856791	310	6	5678	9.15806	1	0.203576	0.177588
GOTERM_BP_DIRECT	GO:0046352~disaccharide catabolic process	3	0.955414	0.0382767	853204, 854635, 853235	310	6	5678	9.15806	1	0.203576	0.177588
GOTERM_BP_DIRECT	GO:0000947~amino acid catabolic process to alcohol via Ehrlich pathway	3	0.955414	0.0382767	852636, 851386, 852442	310	6	5678	9.15806	1	0.203576	0.177588
GOTERM_BP_DIRECT	GO:0009102~biotin biosynthetic process	3	0.955414	0.0382767	855795, 855794, 853203	310	6	5678	9.15806	1	0.203576	0.177588
GOTERM_BP_DIRECT	GO:0098869~cellular oxidant detoxification	5	1.59236	0.0385889	854856, 852215, 855492, 852979, 856014	310	24	5678	3.81586	1	0.203576	0.177588
GOTERM_CC_DIRECT	GO:0000137~Golgi cis cisterna	3	0.955414	0.041999	852845, 856675, 856057	306	7	6279	8.79412	0.993396	0.233994	0.203995
GOTERM_MF_DIRECT	GO:0005506~iron ion binding	5	1.59236	0.0429167	852951, 855021, 853482, 855029, 853047	312	22	5045	3.67497	1	0.426738	0.403255
KEGG_PATHWAY	sce00562:Inositol phosphate metabolism	7	2.2293	0.0451489	851753, 850941, 856229, 851910, 853345, 853288, 850574	314	21	2412	2.56051	0.985067	0.0902979	0.0461304
GOTERM_CC_DIRECT	GO:0005751~mitochondrial respiratory chain complex IV	4	1.27389	0.046538	852688, 854695, 850727, 856448	306	17	6279	4.82814	0.996211	0.247498	0.215767
KEGG_PATHWAY	sce00250:Alanine, aspartate and glutamate metabolism	9	2.86624	0.0466561	855291, 854557, 851237, 854096, 850514, 852902, 856411, 856432, 855501	314	32	2412	2.16043	0.987067	0.0913268	0.0466561
GOTERM_MF_DIRECT	GO:0036381~pyridoxal 5'-phosphate synthase (glutamine hydrolysing) activity	3	0.955414	0.0481619	855120, 855383, 855121	312	6	5045	8.08494	1	0.453238	0.428297
GOTERM_MF_DIRECT	GO:0004032~alditol:NADP+ 1-oxidoreductase activity	3	0.955414	0.0481619	852446, 856504, 854287	312	6	5045	8.08494	1	0.453238	0.428297
GOTERM_MF_DIRECT	GO:0016810~hydrolase activity, acting on carbon-nitrogen (but not peptide) bonds	3	0.955414	0.0481619	854845, 851016, 851360	312	6	5045	8.08494	1	0.453238	0.428297
GOTERM_BP_DIRECT	GO:0042761~very long-chain fatty acid biosynthetic process	3	0.955414	0.0516907	852456, 850400, 851087	310	7	5678	7.84977	1	0.262001	0.228554
GOTERM_BP_DIRECT	GO:0008610~lipid biosynthetic process	3	0.955414	0.0516907	852951, 851413, 856597	310	7	5678	7.84977	1	0.262001	0.228554
GOTERM_BP_DIRECT	GO:0000025~maltose catabolic process	3	0.955414	0.0516907	853204, 854635, 853235	310	7	5678	7.84977	1	0.262001	0.228554
GOTERM_BP_DIRECT	GO:0019243~methylglyoxal catabolic process to D-lactate via S-lactoyl-glutathione	3	0.955414	0.0516907	851865, 855009, 852146	310	7	5678	7.84977	1	0.262001	0.228554
GOTERM_CC_DIRECT	GO:0009277~fungal-type cell wall	11	3.50318	0.0546592	851007, 856625, 852390, 851537, 853199, 853395, 852389, 856137, 853465, 850992, 851299	306	116	6279	1.94582	0.998607	0.271332	0.236546
GOTERM_CC_DIRECT	GO:0030176~integral component of endoplasmic reticulum membrane	8	2.54777	0.0556578	850400, 853941, 852825, 852481, 851087, 855441, 856018, 852872	306	71	6279	2.31207	0.998769	0.271332	0.236546
GOTERM_MF_DIRECT	GO:0047834~D-threo-aldose 1-dehydrogenase activity	4	1.27389	0.0607727	852446, 856504, 854287, 855057	312	15	5045	4.31197	1	0.541473	0.511677
GOTERM_MF_DIRECT	GO:0000026~alpha-1,2-mannosyltransferase activity	4	1.27389	0.0607727	852303, 852735, 856054, 853253	312	15	5045	4.31197	1	0.541473	0.511677
GOTERM_MF_DIRECT	GO:0032450~maltose alpha-glucosidase activity	3	0.955414	0.0647302	853204, 854635, 853235	312	7	5045	6.92995	1	0.541473	0.511677
GOTERM_MF_DIRECT	GO:0004574~oligo-1,6-glucosidase activity	3	0.955414	0.0647302	853204, 854635, 853235	312	7	5045	6.92995	1	0.541473	0.511677
GOTERM_MF_DIRECT	GO:0033934~glucan 1,4-alpha-maltotriohydrolase activity	3	0.955414	0.0647302	853204, 854635, 853235	312	7	5045	6.92995	1	0.541473	0.511677
GOTERM_MF_DIRECT	GO:0004556~alpha-amylase activity	3	0.955414	0.0647302	853204, 854635, 853235	312	7	5045	6.92995	1	0.541473	0.511677
GOTERM_MF_DIRECT	GO:0004022~alcohol dehydrogenase (NAD) activity	3	0.955414	0.0647302	852636, 851386, 852442	312	7	5045	6.92995	1	0.541473	0.511677
GOTERM_CC_DIRECT	GO:0005777~peroxisome	9	2.86624	0.0664002	852523, 850941, 852846, 850514, 852979, 851481, 852691, 850361, 853477	306	89	6279	2.07502	0.999677	0.310753	0.270913
GOTERM_BP_DIRECT	GO:0071704~organic substance metabolic process	3	0.955414	0.0664931	851007, 853732, 855131	310	8	5678	6.86855	1	0.324311	0.282909
GOTERM_BP_DIRECT	GO:0009313~oligosaccharide catabolic process	3	0.955414	0.0664931	853204, 854635, 853235	310	8	5678	6.86855	1	0.324311	0.282909
GOTERM_BP_DIRECT	GO:0006121~mitochondrial electron transport, succinate to ubiquinone	3	0.955414	0.0664931	853716, 851758, 853709	310	8	5678	6.86855	1	0.324311	0.282909
GOTERM_BP_DIRECT	GO:0000272~polysaccharide catabolic process	3	0.955414	0.0664931	851016, 854708, 850992	310	8	5678	6.86855	1	0.324311	0.282909
KEGG_PATHWAY	sce04070:Phosphatidylinositol signaling system	7	2.2293	0.0673078	851753, 850941, 856229, 852317, 851910, 853345, 850574	314	23	2412	2.33786	0.998237	0.129007	0.0673078
GOTERM_MF_DIRECT	GO:0004129~cytochrome-c oxidase activity	4	1.27389	0.0715037	852688, 854695, 850727, 856448	312	16	5045	4.04247	1	0.588788	0.556388
KEGG_PATHWAY	sce00565:Ether lipid metabolism	4	1.27389	0.073603	855593, 854682, 854346, 856523	314	8	2412	3.84076	0.999048	0.135684	0.073603
KEGG_PATHWAY	sce00350:Tyrosine metabolism	5	1.59236	0.076691	856539, 854690, 852636, 851386, 852442	314	13	2412	2.95443	0.999298	0.135684	0.076691
KEGG_PATHWAY	sce00750:Vitamin B6 metabolism	5	1.59236	0.076691	855120, 855383, 856683, 855121, 852323	314	13	2412	2.95443	0.999298	0.135684	0.076691
KEGG_PATHWAY	sce00061:Fatty acid biosynthesis	5	1.59236	0.076691	852314, 855845, 856464, 854495, 854808	314	13	2412	2.95443	0.999298	0.135684	0.076691
GOTERM_CC_DIRECT	GO:0005829~cytosol	73	23.2484	0.0776289	854096, 853286, 856079, 853163, 854099, 851386, 853169, 855303, 854699, 855149, 852113, 853047, 852423, 853798, 856504, 852902, 853172, 856044, 855993, 854384, 856683, 850342, 852875, 853569, 854932, 852636, 851987, 852639, 850614, 855120, 856296, 856692, 855480, 855201, 851360, 856411, 856014, 852098, 855682, 854231, 855447, 855887, 852177, 854872, 853585, 853465, 852446, 851158, 850588, 853732,…	306	1270	6279	1.17947	0.999922	0.34933	0.304544
GOTERM_BP_DIRECT	GO:0006493~protein O-linked glycosylation	4	1.27389	0.0810794	856054, 856718, 851210, 855796	310	19	5678	3.85603	1	0.39128	0.341329
GOTERM_BP_DIRECT	GO:0006071~glycerol metabolic process	3	0.955414	0.0824942	854932, 854419, 854287	310	9	5678	6.10538	1	0.39128	0.341329
GOTERM_BP_DIRECT	GO:0046513~ceramide biosynthetic process	3	0.955414	0.0824942	852481, 855342, 856018	310	9	5678	6.10538	1	0.39128	0.341329
GOTERM_MF_DIRECT	GO:0016831~carboxy-lyase activity	4	1.27389	0.0830165	855291, 856692, 851987, 855552	312	17	5045	3.80468	1	0.673072	0.636034
GOTERM_CC_DIRECT	GO:0043231~intracellular membrane-bounded organelle	7	2.2293	0.0839852	856748, 856229, 855593, 851822, 855003, 856597, 853357	306	63	6279	2.27996	0.999965	0.363936	0.317277
GOTERM_MF_DIRECT	GO:0000030~mannosyltransferase activity	5	1.59236	0.0902734	852735, 856054, 850305, 852196, 851210	312	28	5045	2.88748	1	0.684537	0.646868
GOTERM_BP_DIRECT	GO:0006665~sphingolipid metabolic process	4	1.27389	0.0917076	853307, 855342, 853927, 855137	310	20	5678	3.66323	1	0.405514	0.353746
GOTERM_CC_DIRECT	GO:0005754~mitochondrial proton-transporting ATP synthase, catalytic core	2	0.636943	0.0947971	852177, 853585	306	2	6279	20.5196	0.999991	0.379809	0.331115
GOTERM_CC_DIRECT	GO:0009337~sulfite reductase complex (NADPH)	2	0.636943	0.0947971	853602, 850588	306	2	6279	20.5196	0.999991	0.379809	0.331115
KEGG_PATHWAY	sce00600:Sphingolipid metabolism	5	1.59236	0.0968338	853307, 852481, 855342, 853927, 856018	314	14	2412	2.7434	0.999906	0.168089	0.0968338
GOTERM_CC_DIRECT	GO:0031966~mitochondrial membrane	8	2.54777	0.0973868	850685, 853536, 854888, 852639, 853709, 854893, 855176, 852179	306	81	6279	2.02663	0.999994	0.379809	0.331115
GOTERM_BP_DIRECT	GO:0006116~NADH oxidation	3	0.955414	0.0995207	854919, 855176, 852442	310	10	5678	5.49484	1	0.405514	0.353746
GOTERM_BP_DIRECT	GO:0006644~phospholipid metabolic process	3	0.955414	0.0995207	851413, 853061, 854346	310	10	5678	5.49484	1	0.405514	0.353746
GOTERM_BP_DIRECT	GO:0006221~pyrimidine nucleotide biosynthetic process	3	0.955414	0.0995207	853567, 856692, 853664	310	10	5678	5.49484	1	0.405514	0.353746
