# Supplementary material for: Reduced sphingolipid biosynthesis modulates proteostasis networks to enhance longevity
Source: Aging (Albany NY). 2023 Jan 14;15(2):472–91. doi: 10.18632/aging.204485 (PMC9925692; doi:10.18632/aging.204485)
Supplement: Supplementary Table 3 [file aging-15-204485-s003.xlsx]

## Sheet: Legends
Supplementary Table 3. Genes in each of eight clusters (modules) of highly correlated genes showing a similar response to Myr over the 1–6 h time course.

## Sheet: Cluster analysis
ENTREZID	ORF	GeneID	DESCRIPTION	MMgreen	MMblue	MMred	MMyellow	MMbrown	MMturquoise	MMgrey	moduleColor	GS.Ala	GS.Arg	GS.Asn	GS.Asp	GS.Gln	GS.Glu	GS.Gly	GS.His	GS.ILe	GS.Leu	GS.Lys	GS.Met	GS.Phe	GS.Pro	GS.Ser	GS.Thr	GS.Trp	GS.Tyr	GS.Val	GS.inQ	GS.myriocin	p.GS.Ala	p.GS.Arg	p.GS.Asn	p.GS.Asp	p.GS.Gln	p.GS.Glu	p.GS.Gly	p.GS.His	p.GS.ILe	p.GS.Leu	p.GS.Lys	p.GS.Met	p.GS.Phe	p.GS.Pro	p.GS.Ser	p.GS.Thr	p.GS.Trp
1466460	YGR169C-A	LSO2	Protein with a potential role in response to iron deprivation; localizes to nucleus and cytoplasm, and nuclear localization is enhanced under iron-replete conditions; null mutant exhibits slow growth during iron deprivation; LSO2 has a paralog, LSO1, that arose from the whole genome duplication	0.389486	0.964136	0.644936	-0.292106	0.564315	-0.446089	0.0197078	blue	0.613902	-0.627244	-0.47528	-0.627486	-0.567954	-0.67119	-0.682059	0.0799684	-0.257842	-0.327371	-0.707278	0.0406053	-0.455273	-0.706884	-0.482877	-0.519233	-0.135797	0.303741	0.106798	-0.719257	0.234757	0.0337167	0.0290219	0.118392	0.0289414	0.0540502	0.0168626	0.0145505	0.804871	0.418453	0.298934	0.0100932	0.900292	0.13695	0.0101539	0.111803	0.0836368	0.673895
1466469	YJR005C-A	LSO1	Protein with a potential role in response to iron deprivation; transcription increases during iron deprivation and during treatment with 2-(6-benzyl-2-pyridyl)quinazoline (BPQ) and copper; regulated by Aft1p and, to a lesser extent, by Aft2p; originally identified as a syntenic homolog of an Ashbya gossypii gene; localizes to nucleus and cytoplasm, and nuclear localization is enhanced under iron-…	0.410017	0.915053	0.632927	-0.439623	0.218637	-0.733075	0.0488648	blue	0.802176	-0.311812	-0.2093	-0.447225	-0.344078	-0.398664	-0.428822	0.407587	-0.0221832	-0.188626	-0.511195	0.206404	-0.271345	-0.492653	-0.315412	-0.28504	0.0580341	0.475037	0.245726	-0.850668	0.0468834	0.00169364	0.323817	0.513849	0.144916	0.273451	0.199258	0.164233	0.188456	0.945444	0.55713	0.0893955	0.519822	0.393598	0.103688	0.317961	0.36918	0.857821
3289591	YCL058W-A	ADF1	Transcriptional repressor encoded by the FYV5 antisense strand; negatively regulates transcription of FYV5 by binding to the promoter on the sense strand	0.376136	0.958556	0.552564	-0.486414	0.306292	-0.694963	-0.0248211	blue	0.792627	-0.365719	-0.25972	-0.476093	-0.38602	-0.466787	-0.490553	0.34783	-0.0352048	-0.188767	-0.550545	0.23238	-0.286088	-0.540045	-0.338519	-0.325029	0.0393652	0.484297	0.267674	-0.846445	0.0544977	0.00210717	0.242369	0.41495	0.117675	0.215202	0.126054	0.105397	0.267906	0.913506	0.556832	0.0636092	0.467352	0.367344	0.0699083	0.281787	0.302609	0.903325
850298	YCL059C	KRR1	Nucleolar protein required for rRNA synthesis and ribosomal assembly; required for the synthesis of 18S rRNA and for the assembly of 40S ribosomal subunit; essential gene	0.532383	0.94712	0.597205	-0.378595	0.232004	-0.743164	-0.0668553	blue	0.7104	-0.402465	-0.367135	-0.565967	-0.504117	-0.52733	-0.556481	0.321117	-0.123675	-0.294293	-0.610782	0.128259	-0.382959	-0.62726	-0.44886	-0.40518	-0.0601192	0.348679	0.125648	-0.907277	0.12284	0.00962241	0.194611	0.240411	0.0550868	0.0946836	0.0780957	0.0602279	0.308802	0.701766	0.353142	0.0348885	0.691184	0.219176	0.0290166	0.143274	0.191333	0.852761
850299	YCL058C	FYV5	Protein involved in regulation of the mating pathway; binds with Matalpha2p to promoters of haploid-specific genes; required for survival upon exposure to K1 killer toxin; involved in ion homeostasis	0.470197	0.957467	0.55264	-0.450782	0.277292	-0.717883	-0.0173428	blue	0.820135	-0.362564	-0.276408	-0.503201	-0.415469	-0.474529	-0.512843	0.353999	-0.0726481	-0.296632	-0.559672	0.120144	-0.352795	-0.563795	-0.417347	-0.366383	-0.0365614	0.382955	0.163304	-0.876646	0.15485	0.0010868	0.246765	0.384476	0.0953831	0.179222	0.119057	0.0881942	0.258931	0.82247	0.349148	0.0584627	0.709949	0.260669	0.0562358	0.177064	0.24145	0.910185
850302	YCL056C	PEX34	Protein that regulates peroxisome populations; peroxisomal integral membrane protein; interacts with Pex11p, Pex25p, and Pex27p to control both constitutive peroxisome division and peroxisome morphology and abundance during peroxisome proliferation	0.423289	0.960183	0.689222	-0.314563	0.417484	-0.585243	-0.00944134	blue	0.743417	-0.483152	-0.366396	-0.581457	-0.492896	-0.547329	-0.551264	0.306868	-0.124121	-0.306931	-0.648154	0.0730277	-0.386596	-0.627402	-0.434217	-0.419881	-0.0540064	0.382854	0.124656	-0.812101	0.167868	0.00558539	0.111569	0.241431	0.047364	0.103491	0.0654949	0.0631931	0.331954	0.700733	0.33185	0.0226393	0.821555	0.21446	0.0289695	0.158411	0.174178	0.867609
850303	YCL055W	KAR4	Transcription factor required for response to pheromones; also required during meiosis; exists in two forms, a slower-migrating form more abundant during vegetative growth and a faster-migrating form induced by pheromone	0.229476	0.871938	0.571336	-0.390924	0.530408	-0.386495	0.220196	blue	0.894254	-0.40521	-0.15011	-0.395211	-0.268322	-0.407818	-0.412987	0.279957	-0.0264792	-0.329807	-0.485588	-0.0168061	-0.311819	-0.454297	-0.347057	-0.320085	-0.0429549	0.371218	0.145278	-0.570611	0.27828	8.7e-05	0.191297	0.641464	0.203539	0.399096	0.188181	0.182098	0.378148	0.934897	0.295138	0.109512	0.958657	0.323805	0.1379	0.269043	0.310449	0.89455
850304	YCL054W	SPB1	AdoMet-dependent methyltransferase; involved in rRNA processing and 60S ribosomal subunit maturation; methylates G2922 in the tRNA docking site of the large subunit rRNA and in the absence of snR52, U2921; suppressor of PAB1 mutants	0.438529	0.985143	0.58959	-0.42103	0.367553	-0.659602	0.0200529	blue	0.765669	-0.444439	-0.324823	-0.515317	-0.457933	-0.529752	-0.572909	0.258115	-0.113694	-0.273768	-0.582456	0.13578	-0.36325	-0.6031	-0.414552	-0.39352	-0.0328139	0.385797	0.190416	-0.841389	0.153489	0.00369665	0.147741	0.302933	0.0864102	0.134381	0.0764875	0.0515246	0.417943	0.724974	0.389218	0.046894	0.673932	0.245805	0.0378977	0.180281	0.205654	0.919363
850320	YCL037C	SRO9	Cytoplasmic RNA-binding protein; shuttles between nucleus and cytoplasm and is exported from the nucleus in an mRNA export-dependent manner; associates with translating ribosomes; involved in heme regulation of Hap1p as a component of the HMC complex, also involved in the organization of actin filaments; contains a La motif; SRO9 has a paralog, SLF1, that arose from the whole genome duplication	0.655209	0.928056	0.638772	-0.212618	0.310214	-0.647578	-0.0306779	blue	0.599116	-0.501911	-0.466976	-0.626094	-0.593081	-0.607911	-0.677157	0.169787	-0.291754	-0.428066	-0.648748	-0.0596356	-0.508746	-0.697123	-0.574995	-0.52967	-0.187945	0.139952	-0.0243657	-0.878067	0.297625	0.0395293	0.0963738	0.12588	0.0294067	0.0420945	0.0359923	0.0155622	0.597813	0.357505	0.16506	0.0224743	0.853934	0.0912024	0.0117439	0.0504866	0.0765416	0.558581
850321	YCL036W	GFD2	Protein of unknown function; identified as a high-copy suppressor of a dbp5 mutation; GFD2 has a paralog, YDR514C, that arose from the whole genome duplication	0.604079	0.93104	0.57989	-0.300709	0.196071	-0.757062	-0.102397	blue	0.685764	-0.373041	-0.366075	-0.54729	-0.513351	-0.506148	-0.562739	0.337288	-0.133295	-0.325467	-0.573941	0.0812472	-0.393015	-0.618619	-0.47482	-0.408828	-0.0710278	0.282175	0.0864567	-0.920365	0.163732	0.0138187	0.232348	0.241876	0.0655183	0.0878258	0.0931456	0.0568006	0.283652	0.679617	0.301919	0.0510094	0.801805	0.206289	0.0319989	0.118799	0.186983	0.826376
850326	YCL031C	RRP7	Essential protein involved in rRNA processing and ribosome biogenesis; protein abundance increases in response to DNA replication stress	0.399546	0.980955	0.554801	-0.484757	0.418525	-0.609984	0.0348388	blue	0.780505	-0.48108	-0.3397	-0.548911	-0.460562	-0.565325	-0.58602	0.208102	-0.150488	-0.315265	-0.624594	0.102019	-0.401207	-0.622145	-0.442544	-0.430123	-0.0918672	0.366092	0.156222	-0.810468	0.192806	0.00273857	0.113339	0.280003	0.0645626	0.131871	0.0554246	0.0452432	0.516315	0.640616	0.318199	0.0299143	0.752388	0.196142	0.0307565	0.149684	0.162817	0.776445
850328	YCL029C	BIK1	Microtubule-associated protein; component of the interface between microtubules and kinetochore, involved in sister chromatid separation; essential in polyploid cells but not in haploid or diploid cells; ortholog of mammalian CLIP-170	0.453497	0.872693	0.701265	-0.0847518	0.717827	-0.184112	0.246569	blue	0.537727	-0.741904	-0.50955	-0.648742	-0.59582	-0.722746	-0.737851	-0.123697	-0.441415	-0.563009	-0.709546	-0.290053	-0.608244	-0.742606	-0.631783	-0.651044	-0.345746	-0.00129996	-0.143066	-0.502303	0.533921	0.0713548	0.00573599	0.0906063	0.0224759	0.040916	0.00791912	0.00615448	0.701715	0.150848	0.0566558	0.00974959	0.360444	0.0358632	0.00566575	0.0275382	0.0218452	0.270978
850331	YCL026C-B	HBN1	Protein of unknown function; similar to bacterial nitroreductases; green fluorescent protein (GFP)-fusion protein localizes to the cytoplasm and nucleus; protein becomes insoluble upon intracellular iron depletion; protein abundance increases in response to DNA replication stress	-0.2521	0.57474	0.151078	-0.561494	0.416922	-0.227627	-0.034407	blue	0.389667	-0.278297	-0.076754	-0.131824	-0.0885766	-0.269588	-0.255026	0.0238606	0.0841007	0.27033	-0.263197	0.531719	0.0559496	-0.209436	0.103868	-0.0433464	0.250631	0.634997	0.561274	-0.314616	-0.267422	0.210527	0.381102	0.812589	0.682988	0.784283	0.396788	0.423733	0.941325	0.794973	0.395439	0.408505	0.0751992	0.862885	0.51357	0.748029	0.893594	0.432037
850332	YCL026C-A	FRM2	Type II nitroreductase, using NADH as reductant; mutants are defective in fatty acid mediated repression of genes involved in fatty acid biosynthesis indicative of a role in lipid signaling; involved in the oxidative stress response; transcription induction by cadmium and selenite indicates a possible role in the metal stress response; expression induced in cells treated with the mycotoxin patulin	-0.0847422	0.621347	0.179521	-0.485447	0.270664	-0.405525	-0.210742	blue	0.335415	-0.263137	-0.166043	-0.192236	-0.209276	-0.293549	-0.308371	0.114091	0.0571941	0.255332	-0.295992	0.565059	0.0152011	-0.282647	0.0524628	-0.0633397	0.241072	0.619787	0.532293	-0.473199	-0.301328	0.286503	0.408617	0.606032	0.549468	0.513898	0.354418	0.329469	0.724046	0.859861	0.423157	0.350239	0.0555651	0.962603	0.373388	0.871365	0.844956	0.450369
850334	YCL024W	KCC4	Protein kinase of the bud neck involved in the septin checkpoint; associates with septin proteins, negatively regulates Swe1p by phosphorylation, shows structural homology to bud neck kinases Gin4p and Hsl1p; KCC4 has a paralog, GIN4, that arose from the whole genome duplication	0.280231	0.855111	0.727702	-0.364004	0.299273	-0.591569	0.334679	blue	0.848406	-0.216174	-0.00381334	-0.252925	-0.14771	-0.25378	-0.273678	0.418013	0.144316	-0.0598699	-0.325785	0.243637	-0.0845256	-0.327779	-0.168509	-0.148368	0.250396	0.527808	0.366041	-0.681985	-0.0274127	0.000486015	0.499794	0.990616	0.427694	0.646863	0.426079	0.389381	0.176303	0.654527	0.853366	0.30142	0.445415	0.793957	0.298296	0.600614	0.645383	0.432483
850342	YCL018W	LEU2	Beta-isopropylmalate dehydrogenase (IMDH); catalyzes the third step in the leucine biosynthesis pathway; can additionally catalyze the conversion of beta-ethylmalate into alpha-ketovalerate	0.0862502	0.745382	0.556816	-0.334445	0.525966	-0.273789	0.179119	blue	0.765148	-0.23197	0.0431126	-0.237539	-0.0146549	-0.248227	-0.238463	0.377675	0.0510286	-0.021787	-0.339496	0.222343	-0.0676242	-0.238722	-0.129966	-0.202465	0.211741	0.538428	0.413422	-0.455046	0.0415505	0.00373438	0.46816	0.894165	0.457236	0.963946	0.436613	0.455436	0.226136	0.874857	0.946417	0.280311	0.487328	0.834592	0.454931	0.687256	0.527994	0.508837
850359	YCR003W	MRPL32	Mitochondrial ribosomal protein of the large subunit; protein abundance increases in response to DNA replication stress	-0.680957	-0.831	-0.726055	-0.09561	-0.644748	0.195765	-0.0543786	blue	-0.407355	0.832828	0.736479	0.87724	0.796223	0.863082	0.866098	0.12945	0.635796	0.78149	0.901615	0.508382	0.821525	0.908216	0.851323	0.843979	0.580605	0.211307	0.415642	0.57856	-0.703992	0.188731	0.000771011	0.00630124	0.000178053	0.0019433	0.000299765	0.000269596	0.688442	0.0262725	0.00268246	6.14e-05	0.0914732	0.00104804	4.39e-05	0.000443301	0.000556884	0.0477676
850361	YCR005C	CIT2	Citrate synthase, peroxisomal isozyme involved in glyoxylate cycle; catalyzes condensation of acetyl coenzyme A and oxaloacetate to form citrate; expression is controlled by Rtg1p and Rtg2p transcription factors; SCF-Ucc1 regulates level of Cit2p to maintain citrate homeostasis; oxaloacetate-dependent positive feedback loop inhibits Cit2p ubiquitination; CIT2 has a paralog, CIT1, that arose from …	0.273196	0.928175	0.659217	-0.428285	0.456643	-0.528846	0.119657	blue	0.78984	-0.44031	-0.235322	-0.466348	-0.34826	-0.463605	-0.473458	0.274677	-0.0841678	-0.208533	-0.557888	0.150048	-0.302801	-0.513705	-0.31691	-0.335009	0.0207548	0.469625	0.243685	-0.721434	0.117212	0.00224128	0.151994	0.461571	0.126459	0.267274	0.129007	0.120009	0.387584	0.794812	0.515428	0.0594451	0.641604	0.33873	0.0875693	0.315543	0.287123	0.948953
850382	YCR020C	PET18	Protein of unknown function; has weak similarity to proteins involved in thiamin metabolism; expression is induced in the absence of thiamin	0.232721	0.951129	0.474476	-0.51458	0.521485	-0.474091	0.0825257	blue	0.772294	-0.497584	-0.295565	-0.473608	-0.388738	-0.550206	-0.558598	0.150101	-0.0954449	-0.23134	-0.580264	0.168287	-0.328897	-0.572415	-0.35363	-0.381667	-0.0422016	0.445377	0.256269	-0.654958	0.161577	0.00324179	0.0997481	0.350967	0.119875	0.211712	0.0638065	0.0590529	0.641485	0.767946	0.469403	0.0479299	0.6011	0.296553	0.0517725	0.259462	0.220865	0.896391
850385	YCR021C	HSP30	Negative regulator of the H(+)-ATPase Pma1p; stress-responsive protein; hydrophobic plasma membrane localized; induced by heat shock, ethanol treatment, weak organic acid, glucose limitation, and entry into stationary phase	0.722074	0.783675	0.609872	-0.0248689	0.488794	-0.301001	0.12517	blue	0.562749	-0.610481	-0.521894	-0.731528	-0.599868	-0.693027	-0.720426	0.00880253	-0.512564	-0.774313	-0.737074	-0.502161	-0.729059	-0.748342	-0.807779	-0.742301	-0.513986	-0.220948	-0.381247	-0.612078	0.702297	0.0567949	0.0350031	0.081787	0.0068527	0.0392173	0.0124634	0.00822044	0.97834	0.0883966	0.00311202	0.00623732	0.0961816	0.00714097	0.00511579	0.00148183	0.00569624	0.0873666
850391	YCR026C	NPP1	Nucleotide pyrophosphatase/phosphodiesterase; mediates extracellular nucleotide phosphate hydrolysis along with Npp2p and Pho5p; activity and expression enhanced during conditions of phosphate starvation; involved in spore wall assembly; NPP1 has a paralog, NPP2, that arose from the whole genome duplication, and an npp1 npp2 double mutant exhibits reduced dityrosine fluorescence relative to the s…	0.307939	0.781575	0.701163	0.00374196	0.531044	-0.272508	0.14067	blue	0.518467	-0.37757	-0.165352	-0.314376	-0.250466	-0.375762	-0.422071	0.24389	-0.103754	-0.0816023	-0.380489	0.143263	-0.169763	-0.401369	-0.244624	-0.314725	0.151153	0.363494	0.313892	-0.474368	0.11126	0.0841741	0.226275	0.607552	0.319641	0.43235	0.228688	0.171708	0.444926	0.748298	0.800954	0.222413	0.65691	0.597866	0.195944	0.443513	0.319074	0.639123
850401	YCR035C	RRP43	Exosome non-catalytic core component; involved in 3'-5' RNA processing and degradation in both the nucleus and the cytoplasm; has similarity to E. coli RNase PH and to human hRrp43p (OIP2, EXOSC8); protein abundance increases in response to DNA replication stress	0.30953	0.986477	0.540564	-0.482509	0.500362	-0.538013	0.0475238	blue	0.792279	-0.504027	-0.31844	-0.511036	-0.429727	-0.556554	-0.581159	0.192796	-0.126696	-0.273473	-0.605328	0.13099	-0.369612	-0.597927	-0.393603	-0.404345	-0.0584236	0.421775	0.21646	-0.741695	0.187523	0.00212356	0.0947529	0.313083	0.0895122	0.163247	0.0601871	0.0475051	0.548283	0.694786	0.389752	0.0370067	0.684904	0.237009	0.0400256	0.205551	0.192338	0.856876
850414	YCR047C	BUD23	Methyltransferase that methylates residue G1575 of 18S rRNA; required for rRNA processing and nuclear export of 40S ribosomal subunits independently of methylation activity; diploid mutant displays random budding pattern; functional homolog of human WBSCR22	0.520493	0.967015	0.615567	-0.366736	0.285156	-0.71143	-0.0113978	blue	0.739541	-0.421447	-0.352093	-0.5469	-0.492371	-0.529085	-0.568589	0.30114	-0.121662	-0.305837	-0.596979	0.10712	-0.384142	-0.624042	-0.449896	-0.40737	-0.0551793	0.344727	0.134891	-0.881393	0.156596	0.00597726	0.17241	0.261684	0.0657495	0.103916	0.0769284	0.0537217	0.341518	0.706428	0.333663	0.0404242	0.740376	0.217635	0.0301028	0.14224	0.188714	0.864757
850422	YCR057C	PWP2	Conserved 90S pre-ribosomal component; essential for proper endonucleolytic cleavage of the 35 S rRNA precursor at A0, A1, and A2 sites; contains eight WD-repeats; PWP2 deletion leads to defects in cell cycle and bud morphogenesis	0.519668	0.987514	0.587232	-0.369179	0.416062	-0.607529	0.0318473	blue	0.713333	-0.538628	-0.427453	-0.602519	-0.546641	-0.627024	-0.676754	0.147607	-0.243632	-0.399473	-0.661687	0.00619993	-0.485292	-0.692534	-0.532414	-0.509562	-0.170263	0.25111	0.0672112	-0.825192	0.288598	0.00919511	0.07079	0.165733	0.0381326	0.0659036	0.0290952	0.0156476	0.647095	0.445424	0.198264	0.0190956	0.984743	0.109761	0.0125522	0.0747473	0.0905975	0.596771
850423	YCR059C	YIH1	Negative regulator of eIF2 kinase Gcn2p; competes with Gcn2p for binding to Gcn1p; may contribute to regulation of translation in response to starvation via regulation of Gcn2p; binds to monomeric actin and to ribosomes and polyribosomes; ortholog of mammalian IMPACT	0.468838	0.892364	0.773419	-0.140866	0.416189	-0.49274	0.186807	blue	0.774175	-0.384671	-0.203588	-0.443924	-0.336476	-0.417453	-0.453382	0.375835	-0.103989	-0.313036	-0.498263	-0.00610107	-0.325671	-0.503447	-0.401035	-0.375353	0.00214049	0.321548	0.140493	-0.672542	0.251244	0.00312074	0.216948	0.525659	0.148268	0.284887	0.176943	0.138795	0.22859	0.747745	0.32182	0.0992137	0.984986	0.301598	0.0951948	0.196352	0.229237	0.994732
850424	YCR060W	TAH1	Component of conserved R2TP complex (Rvb1-Rvb2-Tah1-Pih1); R2TP complex interacts with Hsp90 (Hsp82p and Hsc82p) to mediate assembly of large protein complexes such as box C/D snoRNPs and RNA polymerase II; contains a single TPR domain with at least two TPR motifs; plays a role in determining prion variants	0.543617	0.888593	0.697686	-0.215863	0.162488	-0.753458	-0.115978	blue	0.715469	-0.260192	-0.238666	-0.471025	-0.396633	-0.368933	-0.406712	0.530091	-0.0211713	-0.205924	-0.49688	0.15952	-0.264853	-0.497499	-0.353695	-0.296806	0.0837771	0.405564	0.179274	-0.909727	0.0420385	0.00889305	0.414073	0.455041	0.122192	0.201769	0.237939	0.189499	0.0762646	0.94793	0.520815	0.100305	0.620449	0.405452	0.0998147	0.259368	0.348851	0.795747
850427	YCR063W	BUD31	Component of the SF3b subcomplex of the U2 snRNP; increases efficiency of first and second step pre-mRNA splicing; diploid mutants display a random budding pattern instead of the wild-type bipolar pattern; facilitates passage through G1/S Start, but is not required for G2/M transition or exit from mitosis	0.329489	0.968291	0.504355	-0.4816	0.457575	-0.560336	0.122239	blue	0.790209	-0.43918	-0.248873	-0.419875	-0.36286	-0.500367	-0.561667	0.170569	-0.0870838	-0.227347	-0.506843	0.15671	-0.31192	-0.536297	-0.355862	-0.358293	0.00192828	0.403524	0.267095	-0.731696	0.171262	0.00222319	0.153171	0.435382	0.174185	0.24635	0.0975692	0.0573777	0.596104	0.787844	0.477321	0.0926228	0.626698	0.32364	0.0722575	0.256255	0.252788	0.995255
850435	YCR072C	RSA4	WD-repeat protein involved in ribosome biogenesis; may interact with ribosomes; required for maturation and efficient intra-nuclear transport or pre-60S ribosomal subunits, localizes to the nucleolus	0.482738	0.987793	0.582144	-0.404151	0.394684	-0.631587	0.0196443	blue	0.771431	-0.491794	-0.378122	-0.574538	-0.507466	-0.580976	-0.619089	0.222024	-0.173358	-0.374053	-0.636836	0.0370602	-0.442955	-0.65505	-0.494095	-0.459753	-0.127682	0.306497	0.095176	-0.835821	0.249462	0.00329847	0.104385	0.225542	0.0507126	0.0921564	0.0475916	0.0318312	0.487968	0.590016	0.230983	0.0259514	0.908964	0.149262	0.0207786	0.102526	0.13264	0.692514
850436	YCR073C	SSK22	MAP kinase kinase kinase of HOG1 mitogen-activated signaling pathway; functionally redundant with Ssk2p; interacts with and is activated by Ssk1p; phosphorylates Pbs2p; SSK22 has a paralog, SSK2, that arose from the whole genome duplication	0.291204	0.870856	0.549841	-0.172657	0.693594	-0.222571	0.119039	blue	0.594362	-0.604589	-0.362646	-0.468975	-0.452239	-0.577857	-0.631242	-0.00496238	-0.252879	-0.352831	-0.549945	-0.0778599	-0.418718	-0.588338	-0.436134	-0.470095	-0.14234	0.200898	0.0893714	-0.49365	0.368123	0.0415401	0.0373006	0.246649	0.12405	0.139919	0.0490862	0.0277121	0.987788	0.427781	0.260616	0.0639583	0.809932	0.175499	0.0441917	0.156373	0.123032	0.659003
850451	YCR089W	FIG2	Cell wall adhesin, expressed specifically during mating; may be involved in maintenance of cell wall integrity during mating; FIG2 has a paralog, AGA1, that arose from the whole genome duplication	0.55293	0.703046	0.519539	-0.00519133	0.57972	-0.13963	0.181579	blue	0.498159	-0.67806	-0.543217	-0.666193	-0.621088	-0.68269	-0.711453	-0.15431	-0.48136	-0.786538	-0.68398	-0.575149	-0.723798	-0.723655	-0.75313	-0.6826	-0.554511	-0.273935	-0.441758	-0.449111	0.740583	0.0992949	0.0153721	0.0679619	0.0180115	0.0311254	0.0144238	0.00946741	0.632054	0.113099	0.00240854	0.0141675	0.0504105	0.00778522	0.00780334	0.00468837	0.014442	0.0613356
850492	YFL052W	ZNF1	Zinc cluster transcription factor that regulates respiratory growth; binds to promoters of genes involved in respiration, gluconeogenesis, and the glyoxylate shunt; required for normal carbon source utilization and stress response	0.39875	0.838156	0.355395	-0.287408	0.54206	-0.322229	-0.143362	blue	0.580012	-0.549868	-0.464354	-0.624582	-0.514836	-0.659829	-0.652922	0.0804064	-0.277492	-0.435368	-0.689466	-0.080041	-0.490992	-0.671114	-0.558297	-0.571426	-0.26787	0.16038	-0.0131576	-0.599206	0.367211	0.04805	0.0640033	0.128308	0.0299184	0.0867552	0.0195563	0.0213404	0.803821	0.382537	0.157186	0.013115	0.804697	0.105038	0.0168797	0.059219	0.0522718	0.399921
850494	YFL050C	ALR2	Probable Mg(2+) transporter; overexpression confers increased tolerance to Al(3+) and Ga(3+) ions; plays a role in regulating Ty1 transposition	0.139154	0.933837	0.351432	-0.615084	0.563463	-0.432728	0.0802645	blue	0.779372	-0.495001	-0.263459	-0.417456	-0.346509	-0.533529	-0.559173	0.0682821	-0.0854333	-0.20645	-0.535592	0.185638	-0.309954	-0.529841	-0.313533	-0.350246	-0.0440121	0.449421	0.288611	-0.614986	0.165897	0.00280422	0.101799	0.408022	0.176939	0.269851	0.0740265	0.0587363	0.833002	0.791787	0.519727	0.072705	0.563507	0.326861	0.0764291	0.32101	0.26437	0.891968
850516	YFL028C	CAF16	Part of evolutionarily-conserved CCR4-NOT regulatory complex; contains single ABC-type ATPase domain but no transmembrane domain; interacts with several subunits of Mediator	-0.727977	-0.707068	-0.811025	-0.219925	-0.195133	0.490315	-0.0794784	blue	-0.476198	0.316172	0.312169	0.498554	0.424497	0.405544	0.457649	-0.374273	0.202802	0.374479	0.48302	0.154807	0.369248	0.523796	0.498645	0.440756	0.0674044	-0.0629266	0.0654678	0.67154	-0.286412	0.117583	0.316732	0.323233	0.0989846	0.168998	0.190897	0.134653	0.230686	0.527292	0.23041	0.111681	0.630943	0.237507	0.0804822	0.0989136	0.151531	0.835123
850520	YFL024C	EPL1	Subunit of NuA4, an essential histone H4/H2A acetyltransferase complex; conserved region at N-terminus is essential for interaction with the NPC (nucleosome core particle); required for autophagy; homologous to Drosophila Enhancer of Polycomb; coding sequence contains length polymorphisms in different strains	0.455858	0.981076	0.60752	-0.270671	0.612362	-0.412365	0.00450448	blue	0.635514	-0.679378	-0.522723	-0.675672	-0.618226	-0.722732	-0.749811	0.0337382	-0.346069	-0.463232	-0.74765	-0.0909853	-0.560625	-0.759388	-0.585727	-0.601128	-0.258593	0.190657	-0.00265371	-0.712569	0.385848	0.0263601	0.0150976	0.0812164	0.0158788	0.0321396	0.00792096	0.0049816	0.917098	0.270501	0.129356	0.00517988	0.778544	0.0579426	0.00417112	0.0453774	0.0386991	0.417051
850521	YFL023W	BUD27	Unconventional prefoldin protein involved in translation initiation; required for correct assembly of RNAP I, II, and III in an Rpb5p-dependent manner; shuttles between nucleus and cytoplasm; mutants have inappropriate expression of nutrient sensitive genes due to translational derepression of Gcn4p transcription factor; diploid mutants show random budding; ortholog of human URI/RMP	0.410344	0.953092	0.560207	-0.284912	0.689743	-0.30437	0.0783867	blue	0.619017	-0.738729	-0.53225	-0.67334	-0.609054	-0.753226	-0.782818	-0.0772838	-0.422614	-0.521269	-0.756411	-0.163874	-0.614658	-0.767106	-0.612265	-0.642717	-0.344381	0.127803	-0.0447163	-0.60526	0.483968	0.031857	0.00606199	0.0748539	0.0163852	0.0355499	0.0046801	0.00260818	0.811316	0.171099	0.0822188	0.00441144	0.610811	0.033437	0.0035941	0.0343281	0.0241895	0.273001
850540	YFL008W	SMC1	Subunit of the multiprotein cohesin complex; essential protein involved in chromosome segregation and in double-strand DNA break repair; SMC chromosomal ATPase family member, binds DNA with a preference for DNA with secondary structure	0.443299	0.86369	0.882211	-0.0947747	0.505278	-0.380739	0.327774	blue	0.646919	-0.4912	-0.275716	-0.504048	-0.377977	-0.503423	-0.506517	0.203838	-0.197492	-0.296854	-0.564748	-0.0277968	-0.352003	-0.555667	-0.420464	-0.44511	-0.0215205	0.269454	0.114251	-0.60566	0.237283	0.0229849	0.104868	0.385717	0.0947368	0.225734	0.0952133	0.0928676	0.52514	0.538389	0.34877	0.0557298	0.931664	0.261815	0.0606842	0.173519	0.147058	0.947072
850545	YFL003C	MSH4	Protein involved in meiotic recombination; required for normal levels of crossing over, colocalizes with Zip2p to discrete foci on meiotic chromosomes, has homology to bacterial MutS protein	0.503558	0.946848	0.606615	-0.209031	0.667231	-0.316403	0.00800393	blue	0.632042	-0.704794	-0.548035	-0.740297	-0.620688	-0.761811	-0.766791	0.0235062	-0.424136	-0.574851	-0.805232	-0.223585	-0.635517	-0.785845	-0.678048	-0.692454	-0.360402	0.0880177	-0.112295	-0.659811	0.508905	0.027455	0.01048	0.0650777	0.00589927	0.0312658	0.0039829	0.00361637	0.942195	0.1694	0.0505577	0.00157542	0.484835	0.0263592	0.00244484	0.0153746	0.0125665	0.249802
850549	YFL002C	SPB4	Putative ATP-dependent RNA helicase; nucleolar protein required for synthesis of 60S ribosomal subunits at a late step in the pathway; sediments with 66S pre-ribosomes in sucrose gradients	0.5011	0.987597	0.551718	-0.361981	0.495929	-0.533899	-0.0219645	blue	0.674423	-0.602746	-0.489429	-0.656752	-0.594473	-0.690003	-0.724902	0.083252	-0.300469	-0.442357	-0.719355	-0.0379582	-0.53452	-0.738482	-0.577545	-0.569023	-0.233214	0.209269	0.0202031	-0.797704	0.335279	0.0161485	0.0380408	0.10632	0.0203371	0.0414926	0.0130151	0.00764655	0.797004	0.342648	0.149876	0.00836248	0.906767	0.0733896	0.00608787	0.0492375	0.0534981	0.46571
850550	YFL001W	DEG1	tRNA:pseudouridine synthase; introduces pseudouridines at position 38 or 39 in tRNA; also responsible for pseudouracil modification of some mRNAs; important for maintenance of translation efficiency and normal cell growth, localizes to both the nucleus and cytoplasm; non-essential for viability	0.408686	0.988531	0.552574	-0.463365	0.417626	-0.616711	0.0504431	blue	0.79263	-0.466514	-0.328225	-0.524336	-0.451356	-0.553967	-0.587505	0.215837	-0.115622	-0.302401	-0.598753	0.10656	-0.378598	-0.612053	-0.433223	-0.414104	-0.0616378	0.37009	0.17384	-0.812811	0.189421	0.00210704	0.126306	0.2976	0.0801141	0.140791	0.0616442	0.0445676	0.500479	0.720472	0.339399	0.0396802	0.741693	0.224911	0.0344078	0.159474	0.1808	0.849079
850565	YFR012W	DCV1	Protein of unknown function; deletion mutant shows strong genetic interaction with cdc28-as1 mutant in the presence of 1-NM-PP1; DCV1 has a paralog, YOL019W, that arose from the whole genome duplication	0.613273	0.909638	0.769903	-0.0869369	0.480105	-0.460027	0.00827844	blue	0.637036	-0.612332	-0.51759	-0.731576	-0.636232	-0.660078	-0.671878	0.18783	-0.362629	-0.580593	-0.762781	-0.255427	-0.61279	-0.749307	-0.658058	-0.61567	-0.309899	0.0774877	-0.181058	-0.768345	0.451005	0.0258899	0.0343029	0.0847931	0.00684727	0.0261376	0.0194941	0.0167088	0.558827	0.246674	0.0477735	0.00390941	0.42298	0.0341311	0.00502735	0.020003	0.0330652	0.326952
850579	YFR023W	PES4	Poly(A) binding protein, suppressor of DNA polymerase epsilon mutation; PES4 has a paralog, MIP6, that arose from the whole genome duplication	0.530329	0.947986	0.650222	-0.22837	0.519147	-0.466525	-0.0996822	blue	0.622873	-0.673128	-0.582031	-0.771606	-0.687093	-0.73146	-0.728161	0.121426	-0.384032	-0.552019	-0.824444	-0.169477	-0.633217	-0.801788	-0.650414	-0.634884	-0.344231	0.14224	-0.133374	-0.776293	0.412022	0.0305044	0.0164317	0.0470935	0.00328693	0.013563	0.00686055	0.00724794	0.706974	0.217778	0.0627576	0.00097014	0.598493	0.027081	0.00170912	0.0220165	0.0265562	0.273224
850591	YFR032C	RRT5	Putative protein of unknown function; non-essential gene identified in a screen for mutants with increased levels of rDNA transcription; expressed at high levels during sporulation	0.653934	0.63466	0.778603	0.374877	0.576324	-0.0593073	-0.031265	blue	0.211504	-0.768551	-0.707162	-0.820085	-0.759257	-0.738638	-0.740142	-0.0715107	-0.662028	-0.750113	-0.817576	-0.589296	-0.78231	-0.803219	-0.780653	-0.776955	-0.571687	-0.291201	-0.502055	-0.440388	0.691697	0.509323	0.00349319	0.0101111	0.00108823	0.00418146	0.00607148	0.00591519	0.825211	0.019012	0.00495437	0.00116102	0.0437624	0.00263639	0.00165255	0.00273005	0.00294821	0.0521396
850597	YFR036W	CDC26	Subunit of the Anaphase-Promoting Complex/Cyclosome (APC/C); which is a ubiquitin-protein ligase required for degradation of anaphase inhibitors, including mitotic cyclins, during the metaphase/anaphase transition; relocalizes to the cytosol in response to hypoxia	0.415994	0.972412	0.651943	-0.403795	0.429516	-0.586721	0.0702771	blue	0.801145	-0.494023	-0.348333	-0.577317	-0.476241	-0.559276	-0.563878	0.257234	-0.140551	-0.357073	-0.649094	0.0369381	-0.41841	-0.631889	-0.460609	-0.435467	-0.102292	0.353226	0.10023	-0.800831	0.221373	0.00173498	0.102583	0.267168	0.0493484	0.117545	0.0586797	0.0561917	0.419591	0.663063	0.254525	0.0223787	0.909263	0.175849	0.027504	0.131827	0.157081	0.751745
850624	YLL035W	GRC3	Polynucleotide kinase present on rDNA; required for efficient transcription termination by RNA polymerase I; functions with Las1p in a conserved mechanism to modulate rRNA processing and ribosome biogenesis; required for cell growth; mRNA is cell-cycle regulated	0.595913	0.951954	0.575262	-0.243743	0.524368	-0.452076	0.0190202	blue	0.567412	-0.709702	-0.61063	-0.746233	-0.699754	-0.787444	-0.825902	-0.0510278	-0.455745	-0.581648	-0.79568	-0.198309	-0.669701	-0.834435	-0.701027	-0.690492	-0.394323	0.0359451	-0.139295	-0.736475	0.48525	0.0543317	0.00972618	0.0349464	0.00531309	0.0112983	0.00236173	0.000932943	0.874859	0.136491	0.0472737	0.00196738	0.536674	0.017199	0.000736764	0.0110874	0.0129248	0.204649
850625	YLL034C	RIX7	Putative ATPase of the AAA family; required for export of pre-ribosomal large subunits from the nucleus; distributed between the nucleolus, nucleoplasm, and nuclear periphery depending on growth conditions	0.471415	0.98711	0.547843	-0.405461	0.405512	-0.619986	-0.0125499	blue	0.720252	-0.507392	-0.395599	-0.56721	-0.516387	-0.596814	-0.645352	0.180051	-0.201027	-0.341079	-0.632685	0.0753358	-0.438243	-0.660627	-0.481764	-0.466499	-0.122965	0.312067	0.12891	-0.822657	0.231949	0.00824348	0.0922116	0.203054	0.0544366	0.0856462	0.0404942	0.0234289	0.575509	0.53099	0.27793	0.02725	0.815999	0.154152	0.0193575	0.112753	0.12632	0.70341
850632	YLL027W	ISA1	Protein required for maturation of mitochondrial [4Fe-4S] proteins; functions in a complex with Isa2p and possibly Iba57p; isa1 deletion causes loss of mitochondrial DNA and respiratory deficiency; depletion reduces growth on nonfermentable carbon sources; functional ortholog of bacterial A-type ISC proteins; human ISCA1 can complement isa1 null mutant	0.581945	0.968573	0.661728	-0.262303	0.379019	-0.624823	-0.0916156	blue	0.684037	-0.518944	-0.456776	-0.665213	-0.580171	-0.617037	-0.648224	0.263468	-0.262821	-0.424021	-0.707946	-0.0280346	-0.505735	-0.704765	-0.561361	-0.531122	-0.179342	0.242124	0.0102293	-0.876978	0.282239	0.0141565	0.0838394	0.135494	0.0182433	0.0479745	0.0325681	0.0226199	0.408004	0.4092	0.169528	0.00999111	0.931081	0.0934569	0.0104846	0.0575431	0.0755888	0.577039
850642	YLL018C-A	COX19	Protein required for cytochrome c oxidase assembly; located in the cytosol and mitochondrial intermembrane space; putative copper metallochaperone that delivers copper to cytochrome c oxidase; contains twin cysteine-x9-cysteine motifs	0.348524	0.953859	0.602718	-0.291285	0.687042	-0.311348	0.170966	blue	0.721734	-0.602909	-0.364502	-0.548789	-0.440772	-0.632036	-0.656403	0.0612342	-0.240955	-0.379291	-0.640183	-0.0510964	-0.441413	-0.636577	-0.492008	-0.528383	-0.142949	0.261541	0.115271	-0.593062	0.363867	0.00804959	0.037975	0.244059	0.0646342	0.151515	0.027457	0.0204271	0.850057	0.450595	0.223993	0.0249376	0.874692	0.15085	0.026031	0.104211	0.0773936	0.657622
850649	YLL011W	SOF1	Protein required for biogenesis of 40S (small) ribosomal subunit; has similarity to the beta subunit of trimeric G-proteins and the splicing factor Prp4p; essential gene	0.434014	0.981189	0.568837	-0.444993	0.345292	-0.67923	-0.0196206	blue	0.773881	-0.430642	-0.324405	-0.522897	-0.458948	-0.523301	-0.560222	0.282674	-0.105496	-0.274388	-0.589162	0.144916	-0.363554	-0.600594	-0.412545	-0.386813	-0.0378725	0.397106	0.18585	-0.85848	0.141461	0.00313945	0.162254	0.303592	0.0810971	0.133408	0.0808203	0.0581619	0.373339	0.744194	0.388103	0.0438222	0.653169	0.245379	0.038918	0.182613	0.21418	0.906976
850651	YLL009C	COX17	Copper metallochaperone that transfers copper to Sco1p and Cox11p; eventual delivery to cytochrome c oxidase; contains twin cysteine-x9-cysteine motifs; interacts with the MICOS complex, and interaction is promoted by copper ions; human homolog COX17 partially complements yeast null mutant	-0.691134	-0.928768	-0.73596	0.0917404	-0.471761	0.477863	-0.0916712	blue	-0.586866	0.622912	0.522981	0.704211	0.620146	0.695489	0.755463	-0.0797849	0.435692	0.561312	0.734039	0.230908	0.623723	0.761389	0.683313	0.663254	0.311426	-0.0273185	0.128052	0.764949	-0.482727	0.0448571	0.0304912	0.0810398	0.0105723	0.0314567	0.0120271	0.0044902	0.805311	0.156842	0.0575696	0.00656864	0.470258	0.0302119	0.00401523	0.0142997	0.0187133	0.324448
850652	YLL008W	DRS1	Nucleolar DEAD-box protein required for ribosome assembly and function; including synthesis of 60S ribosomal subunits; constituent of 66S pre-ribosomal particles	0.517564	0.980401	0.560399	-0.387539	0.370901	-0.64663	-0.045021	blue	0.691118	-0.528809	-0.451396	-0.619167	-0.574866	-0.627587	-0.669848	0.168389	-0.231944	-0.385675	-0.674784	0.0348494	-0.483018	-0.702288	-0.52482	-0.496506	-0.171359	0.267334	0.0615316	-0.859228	0.248824	0.0128096	0.0771108	0.140751	0.0318037	0.0505505	0.0289078	0.0171655	0.600877	0.468213	0.215648	0.0160703	0.914377	0.111683	0.0108812	0.0797853	0.1006	0.594377
850656	YLL004W	ORC3	Subunit of the origin recognition complex (ORC); ORC directs DNA replication by binding to replication origins and is also involved in transcriptional silencing	0.550015	0.855509	0.706375	-0.00429094	0.659367	-0.221204	0.200316	blue	0.582895	-0.602539	-0.397547	-0.590933	-0.45763	-0.629649	-0.685432	0.0423177	-0.416613	-0.513383	-0.639782	-0.267671	-0.542935	-0.642745	-0.614075	-0.640668	-0.254742	0.0250588	-0.0608309	-0.541426	0.538666	0.0466881	0.0381244	0.200637	0.043035	0.134672	0.0282286	0.0138831	0.896107	0.177905	0.0878021	0.0250577	0.400285	0.0681338	0.0241812	0.0336526	0.0247931	0.424267
850666	YLL060C	GTT2	Glutathione S-transferase capable of homodimerization; functional overlap with Gtt2p, Grx1p, and Grx2p; protein abundance increases in response to DNA replication stress	-0.0280774	0.697131	0.26207	-0.474173	0.32493	-0.428891	-0.210177	blue	0.40189	-0.328969	-0.221539	-0.274044	-0.276691	-0.356911	-0.365914	0.139852	0.0178752	0.171686	-0.379617	0.504849	-0.059261	-0.358012	-0.0230792	-0.128787	0.188928	0.610523	0.481508	-0.531966	-0.233175	0.19531	0.29644	0.488943	0.388722	0.38397	0.254756	0.242098	0.664652	0.956029	0.593662	0.223563	0.0941276	0.854843	0.253188	0.943244	0.689968	0.556489
850671	YLL055W	YCT1	High-affinity cysteine-specific transporter; has similarity to the Dal5p family of transporters; green fluorescent protein (GFP)-fusion protein localizes to the endoplasmic reticulum; YCT1 is not an essential gene	-0.0174081	0.801073	0.262063	-0.619555	0.397714	-0.464921	-0.0340277	blue	0.58944	-0.343398	-0.166081	-0.256656	-0.231528	-0.383776	-0.40555	0.11343	0.0525894	0.112613	-0.378278	0.479511	-0.0771394	-0.372013	-0.0644058	-0.151876	0.184132	0.624592	0.512352	-0.562487	-0.15583	0.043698	0.274463	0.605947	0.420674	0.469032	0.218111	0.19089	0.72559	0.871057	0.7275	0.225335	0.114692	0.811663	0.23374	0.842375	0.6375	0.566732
850678	YLL048C	YBT1	Transporter of the ATP-binding cassette (ABC) family; involved in bile acid transport; negative regulator of vacuole fusion; regulates release of lumenal Ca2+ stores; similar to mammalian bile transporters; YBT1 has a paralog, VMR1, that arose from the whole genome duplication	0.0949744	0.779649	0.328432	-0.414534	0.596744	-0.222358	0.332728	blue	0.666486	-0.371587	-0.0749321	-0.181125	-0.143132	-0.384734	-0.440016	-0.01938	-0.00701515	-0.0984281	-0.284392	0.165121	-0.141061	-0.346957	-0.204233	-0.254636	0.0932484	0.347922	0.360402	-0.359343	0.163244	0.0179424	0.234318	0.81697	0.573193	0.657206	0.216867	0.1523	0.952331	0.982737	0.760876	0.370316	0.608062	0.661904	0.269189	0.524319	0.424466	0.773161
850680	YLL046C	RNP1	Ribonucleoprotein that contains two RNA recognition motifs (RRM); RNP1 has a paralog, SBP1, that arose from the whole genome duplication	0.491895	0.919836	0.588822	-0.225118	0.29713	-0.648458	-0.155014	blue	0.663124	-0.3647	-0.310743	-0.480878	-0.454297	-0.457375	-0.510019	0.385799	-0.0894083	-0.229873	-0.522968	0.150071	-0.311745	-0.557044	-0.384641	-0.355363	0.0195013	0.371772	0.188746	-0.826405	0.112765	0.0187448	0.243783	0.325566	0.113513	0.1379	0.134916	0.0902606	0.215488	0.7823	0.472305	0.0810483	0.641553	0.323926	0.0599139	0.216987	0.256971	0.952033
850688	YLR002C	NOC3	Subunit of a nuclear complex with Noc2p and pre-replicative complexes; the Noc2p-Noc3p complex binds to 66S ribosomal precursors to mediate their maturation and intranuclear transport; binds to chromatin at active replication origins, and is required for pre-RC formation and maintenance during DNA replication licensing	0.457098	0.977754	0.537701	-0.447916	0.335319	-0.682345	-0.0159608	blue	0.745595	-0.437113	-0.342108	-0.52415	-0.471237	-0.54175	-0.587582	0.240106	-0.125952	-0.279725	-0.587222	0.142436	-0.373981	-0.613644	-0.428812	-0.404071	-0.0535095	0.366498	0.179818	-0.857488	0.152159	0.00537386	0.15534	0.276389	0.0802407	0.122	0.0688573	0.0445328	0.452242	0.696503	0.378561	0.0446954	0.658783	0.23108	0.0338127	0.164245	0.192668	0.868818
850689	YLR003C	CMS1	Putative subunit of the 90S preribosome processome complex; overexpression rescues supressor mutant of mcm10; null mutant is viable; relocalizes from nucleus to cytoplasm upon DNA replication stress	0.607917	0.925438	0.52071	-0.355614	0.213467	-0.738342	-0.169567	blue	0.649163	-0.440519	-0.451042	-0.632216	-0.584852	-0.581766	-0.621458	0.262819	-0.226161	-0.401022	-0.659989	0.0287628	-0.484311	-0.685438	-0.542973	-0.481749	-0.188078	0.224606	0.00317064	-0.9268	0.22047	0.0223598	0.151777	0.141102	0.0273993	0.0457795	0.0472182	0.0309958	0.409204	0.479683	0.196367	0.0195163	0.929295	0.110588	0.013882	0.0681108	0.112766	0.558298
850690	YLR004C	THI73	Putative plasma membrane permease; proposed to be involved in carboxylic acid uptake and repressed by thiamine; substrate of Dbf2p/Mob1p kinase; transcription is altered if mitochondrial dysfunction occurs	0.38096	0.963108	0.719601	-0.251632	0.54541	-0.45925	0.0527419	blue	0.722201	-0.529747	-0.341684	-0.554191	-0.451248	-0.557237	-0.571501	0.256124	-0.184805	-0.296907	-0.634798	0.0569272	-0.388492	-0.611183	-0.424836	-0.450488	-0.0525471	0.37907	0.167336	-0.707001	0.223491	0.00798917	0.0764914	0.277023	0.0615173	0.140898	0.0598064	0.0522334	0.421671	0.565289	0.348679	0.0265832	0.860509	0.212027	0.0347363	0.168622	0.141651	0.87116
850693	YLR007W	NSE1	Component of the SMC5-SMC6 complex; this complex plays a key role in the removal of X-shaped DNA structures that arise between sister chromatids during DNA replication and repair	0.394412	0.973535	0.636037	-0.405354	0.403621	-0.615044	0.0328404	blue	0.830727	-0.4122	-0.26256	-0.503566	-0.396472	-0.483563	-0.501941	0.349717	-0.0741697	-0.273788	-0.5763	0.119897	-0.335877	-0.558098	-0.390994	-0.370824	-0.00587017	0.428029	0.19772	-0.809868	0.155772	0.000817632	0.183017	0.409683	0.0951043	0.201969	0.111221	0.0963507	0.265142	0.818805	0.389183	0.0498445	0.710523	0.285798	0.0593285	0.208841	0.235355	0.985555
850694	YLR008C	PAM18	Subunit of the import motor (PAM complex); the PAM complex is a component of the Translocase of the Inner Mitochondrial membrane (TIM23 complex); essential J-protein cochaperone that stimulates Ssc1p ATPase activity to drive import; inhibited by Pam16p	0.152786	0.874051	0.374077	-0.63145	0.503277	-0.424783	0.252534	blue	0.728141	-0.442578	-0.203116	-0.366807	-0.25598	-0.504141	-0.528829	0.00276835	-0.0858029	-0.135975	-0.483246	0.226827	-0.251756	-0.475694	-0.277423	-0.337761	0.00846728	0.432714	0.34002	-0.571042	0.113746	0.0072504	0.149649	0.526639	0.240864	0.421941	0.0946654	0.0770977	0.993187	0.790904	0.673487	0.111489	0.478356	0.429904	0.118026	0.382662	0.282934	0.979165
850695	YLR009W	RLP24	Essential protein required for ribosomal large subunit biogenesis; associated with pre-60S ribosomal subunits; stimulates the ATPase activity of Afg2p, which is required for release of Rlp24p from the pre-60S particle; has similarity to Rpl24Ap and Rpl24Bp	0.588897	0.93589	0.610258	-0.329561	0.223333	-0.742707	-0.121817	blue	0.651625	-0.444726	-0.441945	-0.629934	-0.581048	-0.571603	-0.599696	0.284698	-0.192187	-0.35808	-0.661124	0.0596425	-0.450197	-0.679387	-0.51025	-0.457279	-0.132155	0.270339	0.0339681	-0.936576	0.166619	0.0216883	0.147449	0.150301	0.0281359	0.0475576	0.0521819	0.0392883	0.369779	0.54957	0.25309	0.0192344	0.853917	0.141941	0.0150959	0.0900904	0.135009	0.68223
850701	YLR014C	PPR1	Zinc finger transcription factor; contains a Zn(2)-Cys(6) binuclear cluster domain, positively regulates transcription of URA1, URA3, URA4, and URA10, which are involved in de novo pyrimidine biosynthesis, in response to pyrimidine starvation; activity may be modulated by interaction with Tup1p	0.329903	0.978277	0.511944	-0.503124	0.403716	-0.624015	0.0168591	blue	0.816837	-0.422686	-0.271613	-0.462503	-0.401133	-0.495173	-0.530735	0.264326	-0.0500478	-0.234075	-0.54629	0.178458	-0.316145	-0.555496	-0.355902	-0.340387	-0.00122241	0.449368	0.244978	-0.79297	0.127706	0.00118315	0.171019	0.393112	0.130039	0.196232	0.101662	0.0758418	0.406424	0.877246	0.464018	0.0661122	0.578949	0.316776	0.0607798	0.256198	0.278969	0.996992
850703	YLR016C	PML1	Subunit of the RES complex; RES complex is required for nuclear retention of unspliced pre-mRNAs; acts in the same pathway as Pml39p and Mlp1p	0.310452	0.940616	0.59803	-0.383421	0.529486	-0.47045	-0.01812	blue	0.779723	-0.501878	-0.317087	-0.546818	-0.422587	-0.531137	-0.540893	0.263198	-0.166014	-0.321828	-0.633497	0.0439588	-0.401036	-0.578392	-0.41257	-0.423759	-0.0945806	0.39035	0.142777	-0.719613	0.23773	0.00278372	0.0963999	0.315258	0.0657982	0.17113	0.0755791	0.0693843	0.408503	0.606095	0.307672	0.0269923	0.892098	0.196351	0.0488277	0.182584	0.169819	0.769997
850704	YLR017W	MEU1	Methylthioadenosine phosphorylase (MTAP); catalyzes the initial step in the methionine salvage pathway; affects polyamine biosynthesis through regulation of ornithine decarboxylase (Spe1p) activity; regulates ADH2 gene expression	0.444923	0.994099	0.632139	-0.372557	0.525193	-0.508747	0.106538	blue	0.749244	-0.573933	-0.39619	-0.600098	-0.501452	-0.633655	-0.661615	0.136926	-0.254058	-0.395292	-0.678083	-0.00360092	-0.479187	-0.67854	-0.51674	-0.522467	-0.16494	0.286722	0.0958206	-0.746963	0.312449	0.00503309	0.0510132	0.20232	0.0391225	0.0967284	0.0269423	0.0191133	0.671317	0.425555	0.203438	0.0153672	0.991139	0.114972	0.0152718	0.0853949	0.0813924	0.608461
850705	YLR018C	POM34	Subunit of the transmembrane ring of the nuclear pore complex (NPC); contributes to nucleocytoplasmic transport, NPC biogenesis and spindle pole body duplication	0.345934	0.9738	0.511712	-0.421499	0.604569	-0.419523	0.0198698	blue	0.665316	-0.657413	-0.49017	-0.640928	-0.570836	-0.712921	-0.719884	0.00356575	-0.277034	-0.390444	-0.732534	0.00404118	-0.503284	-0.729138	-0.520927	-0.550705	-0.218811	0.274012	0.0739247	-0.692019	0.305088	0.0182189	0.0201674	0.105711	0.024716	0.052571	0.00925436	0.00829209	0.991225	0.383356	0.209539	0.00673789	0.990055	0.0953195	0.00713161	0.0824559	0.0635166	0.494448
850707	YLR020C	YEH2	Steryl ester hydrolase; catalyzes steryl ester hydrolysis at the plasma membrane; involved in sterol metabolism; YEH2 has a paralog, YEH1, that arose from the whole genome duplication	0.181753	0.616096	0.582095	-0.0258107	0.599547	-0.0231956	0.549866	blue	0.408248	-0.399423	-0.0901495	-0.174057	-0.114405	-0.364247	-0.415216	-0.101919	-0.135025	-0.0739766	-0.254804	0.0510631	-0.132609	-0.316249	-0.204498	-0.305869	0.104943	0.201497	0.290789	-0.166376	0.196861	0.187671	0.198325	0.780534	0.588494	0.723311	0.244414	0.179514	0.752626	0.675658	0.81927	0.42415	0.874773	0.68119	0.316609	0.523768	0.333611	0.745497
850709	YLR022C	SDO1	Guanine nucleotide exchange factor (GEF) for Ria1p; essential protein involved in ribosome maturation; with Ria1p, promotes release of Tif6p from 60S ribosomal subunits in the cytoplasm so that they can assemble with 40S subunits to generate mature ribosomes; ortholog of the human protein (SBDS) responsible for autosomal recessive Shwachman-Bodian-Diamond Syndrome; highly conserved across archaea…	0.384918	0.974832	0.52419	-0.507379	0.367473	-0.656417	-0.00256949	blue	0.760362	-0.462144	-0.343845	-0.528285	-0.468231	-0.548526	-0.579605	0.211661	-0.119697	-0.271598	-0.603742	0.152699	-0.374821	-0.611698	-0.406917	-0.391566	-0.0626196	0.397241	0.18582	-0.83529	0.139759	0.0040947	0.130378	0.273797	0.0774588	0.124729	0.0647885	0.0482449	0.509003	0.710988	0.393139	0.0376393	0.635658	0.22995	0.0345418	0.189254	0.208117	0.8467
850710	YLR023C	IZH3	Membrane protein involved in zinc ion homeostasis; member of the four-protein IZH family, expression induced by zinc deficiency; deletion reduces sensitivity to elevated zinc and shortens lag phase, overexpression reduces Zap1p activity	0.504307	0.890898	0.451516	-0.46839	0.105262	-0.818463	-0.0803017	blue	0.712694	-0.254789	-0.253821	-0.432324	-0.400112	-0.414081	-0.468513	0.341611	-0.00503496	-0.19416	-0.464913	0.221343	-0.264901	-0.512316	-0.357036	-0.288755	0.0399755	0.367846	0.20221	-0.927058	0.0212149	0.00928705	0.424178	0.426001	0.160439	0.19748	0.180827	0.124472	0.277133	0.98761	0.545401	0.127788	0.489339	0.405365	0.0885769	0.254577	0.362695	0.901832
850719	YLR032W	RAD5	DNA helicase/Ubiquitin ligase; involved in error-free DNA damage tolerance (DDT), replication fork regression during postreplication repair by template switching, error-prone translesion synthesis; promotes synthesis of free and PCNA-bound polyubiquitin chains by Ubc13p-Mms2p; forms nuclear foci upon DNA replication stress; associates with native telomeres, cooperates with homologous recombinatio…	0.214057	0.914187	0.689696	-0.368894	0.570583	-0.389141	0.329819	blue	0.779108	-0.46437	-0.179239	-0.384624	-0.276992	-0.459568	-0.472803	0.173029	-0.0581086	-0.170362	-0.490481	0.142723	-0.246566	-0.478867	-0.281496	-0.325888	0.0730361	0.455476	0.30298	-0.570281	0.142487	0.00281965	0.128293	0.577261	0.217009	0.383431	0.132817	0.120594	0.590732	0.85764	0.596556	0.105456	0.658134	0.439789	0.115249	0.37542	0.301257	0.821535
850732	YLR043C	TRX1	Cytoplasmic thioredoxin isoenzyme; part of thioredoxin system which protects cells against oxidative and reductive stress; forms LMA1 complex with Pbi2p; acts as a cofactor for Tsa1p; required for ER-Golgi transport and vacuole inheritance; with Trx2p, facilitates mitochondrial import of small Tims Tim9p, Tim10p, Tim13p by maintaining them in reduced form; abundance increases iunder DNA replicati…	-0.580687	-0.976106	-0.715377	0.236473	-0.433227	0.574091	-0.0181303	blue	-0.702032	0.522593	0.415353	0.641007	0.531076	0.612762	0.643644	-0.247059	0.270837	0.414034	0.689402	0.0347457	0.488134	0.686448	0.557533	0.543658	0.153815	-0.241285	-0.0426497	0.829065	-0.302192	0.0109227	0.0813057	0.179355	0.0246925	0.0756188	0.0341418	0.0239198	0.438845	0.394519	0.180882	0.0131269	0.914631	0.107389	0.0136867	0.0596417	0.0676944	0.63316
850748	YLR059C	REX2	3'-5' RNA exonuclease; involved in 3'-end processing of U4 and U5 snRNAs, 5S and 5.8S rRNAs, and RNase P and RNase MRP RNA; localized to mitochondria and null suppresses escape of mtDNA to nucleus in yme1 yme2 mutants; RNase D exonuclease	0.705439	0.906056	0.709345	-0.0440158	0.396979	-0.531801	-0.099177	blue	0.558132	-0.54558	-0.523752	-0.71155	-0.636449	-0.65233	-0.690208	0.212582	-0.351281	-0.513201	-0.723806	-0.177844	-0.565585	-0.740975	-0.656041	-0.616447	-0.249432	0.0661648	-0.126272	-0.834376	0.385177	0.0593102	0.0665369	0.0805121	0.00945314	0.0260705	0.0214986	0.0129772	0.507118	0.262863	0.0879343	0.00778427	0.580277	0.0552879	0.00583002	0.0205207	0.032782	0.434316
850752	YLR063W	BMT6	Methyltransferase required for m3U2843 methylation of the 25S rRNA; S-adenosylmethionine-dependent; green fluorescent protein (GFP)-fusion protein localizes to the cytoplasm; YLR063W is not an essential gene	0.648771	0.948499	0.585683	-0.249676	0.344609	-0.628746	-0.101529	blue	0.590372	-0.579889	-0.562186	-0.709708	-0.684499	-0.693088	-0.738086	0.122486	-0.337942	-0.502794	-0.738245	-0.0995501	-0.586945	-0.782752	-0.639783	-0.591043	-0.287846	0.11214	-0.0949101	-0.87442	0.34774	0.0432835	0.0481091	0.0570977	0.00972537	0.0140654	0.0124524	0.00612958	0.704518	0.28266	0.0956948	0.00611284	0.758222	0.0448212	0.00261186	0.0250574	0.0429867	0.364276
850757	YLR068W	FYV7	Essential protein required for maturation of 18S rRNA; required for survival upon exposure to K1 killer toxin	0.415415	0.889372	0.495463	-0.469932	0.0871376	-0.841521	-0.15896	blue	0.716957	-0.240505	-0.237417	-0.418093	-0.390493	-0.368224	-0.408566	0.436231	0.0526964	-0.10663	-0.463959	0.314496	-0.210578	-0.480908	-0.267326	-0.214793	0.111259	0.497943	0.274402	-0.93557	-0.0817669	0.00868695	0.451468	0.457475	0.176211	0.209476	0.238913	0.187293	0.156271	0.870796	0.741528	0.128676	0.319446	0.511224	0.113487	0.400916	0.502602	0.730668
850763	YLR074C	BUD20	C2H2-type zinc finger protein required for ribosome assembly; shuttling factor which associates with pre-60S particles in the nucleus, accompanying them to the cytoplasm; cytoplasmic dissociation of Bud20p requires Drg1p; N-terminus harbors a nuclear localization signal (NLS) and a nuclear export signal (NES); cytoplasmic Bud20p is reimported by Kap123-dependent pathway; involved in bud-site sele…	0.527796	0.970974	0.598169	-0.377231	0.320498	-0.683527	-0.0541163	blue	0.725676	-0.479685	-0.413859	-0.611623	-0.546196	-0.583964	-0.61441	0.260074	-0.191324	-0.37378	-0.663078	0.0484113	-0.457272	-0.674663	-0.505763	-0.465723	-0.141023	0.301049	0.0675315	-0.880927	0.218281	0.00755039	0.114541	0.181085	0.0345699	0.0661685	0.0461902	0.0335288	0.414292	0.5514	0.231351	0.0187559	0.881234	0.135016	0.0160963	0.0934359	0.127037	0.66199
850772	YLR083C	EMP70	Protein with a role in cellular adhesion and filamentous growth; also endosome-to-vacuole sorting; similar to Tmn3p; member of Transmembrane Nine family of proteins with 9 transmembrane segments; EMP70 has a paralog, TMN2, that arose from the whole genome duplication	0.320046	0.798141	0.400819	-0.207283	0.665781	-0.156655	0.274967	blue	0.49419	-0.590341	-0.3553	-0.40995	-0.392513	-0.610327	-0.689325	-0.207744	-0.299398	-0.335047	-0.49013	-0.0819162	-0.405441	-0.571976	-0.455147	-0.511382	-0.172485	0.0885958	0.10771	-0.382322	0.408247	0.102449	0.0432972	0.25706	0.185658	0.206922	0.0350621	0.0131414	0.517054	0.344456	0.287066	0.105743	0.800202	0.19102	0.0519938	0.137072	0.0892592	0.591918
850783	YLR094C	GIS3	Protein of unknown function	0.641321	0.876402	0.692594	-0.0231322	0.541417	-0.353811	-0.0551937	blue	0.502502	-0.747747	-0.67725	-0.830395	-0.779935	-0.786199	-0.790084	0.014181	-0.510575	-0.708178	-0.855809	-0.382835	-0.750323	-0.866111	-0.771107	-0.732501	-0.491744	-0.0783573	-0.335269	-0.69274	0.579781	0.0959191	0.00517089	0.0155427	0.000825211	0.00277145	0.00242626	0.00222932	0.965111	0.0898512	0.00995572	0.000383371	0.219338	0.00493553	0.000269476	0.00331993	0.00674159	0.104425
850785	YLR096W	KIN2	Serine/threonine protein kinase involved in regulation of exocytosis; localizes to the cytoplasmic face of the plasma membrane; KIN2 has a paralog, KIN1, that arose from the whole genome duplication	0.228721	0.939507	0.465057	-0.480498	0.648684	-0.347729	0.221081	blue	0.754126	-0.563368	-0.296504	-0.45104	-0.376891	-0.582784	-0.621496	-0.0138873	-0.174914	-0.303587	-0.558011	0.0433661	-0.379812	-0.572603	-0.40134	-0.436608	-0.104244	0.319702	0.197399	-0.572137	0.293907	0.00460293	0.0564634	0.349366	0.141103	0.227179	0.0467404	0.0309826	0.965833	0.58663	0.337414	0.0593771	0.893546	0.223305	0.0516779	0.19598	0.155872	0.747143
850796	YLR106C	MDN1	Huge dynein-related AAA-type ATPase (midasin); forms extended pre-60S particle with the Rix1 complex (Rix1p-Ipi1p-Ipi3p); acts in removal of ribosomal biogenesis factors at successive steps of pre-60S assembly and export from nucleus	0.515773	0.968306	0.595059	-0.382043	0.30006	-0.70233	0.00387731	blue	0.780181	-0.401135	-0.317368	-0.523109	-0.463135	-0.50707	-0.553271	0.311656	-0.106255	-0.324444	-0.571776	0.0818509	-0.379944	-0.600288	-0.451954	-0.398216	-0.0552479	0.331238	0.128046	-0.876866	0.184517	0.00275718	0.196229	0.314805	0.0809516	0.129447	0.0924529	0.0620404	0.324072	0.742409	0.303531	0.0520945	0.800359	0.22313	0.0390443	0.140199	0.199811	0.86459
850807	YLR116W	MSL5	Component of commitment complex; which defines first step in splicing pathway; essential protein that interacts with Mud2p and Prp40p, forming a bridge between the intron ends; also involved in nuclear retention of pre-mRNA; relocalizes to the cytosol in response to hypoxia	0.320624	0.944114	0.584917	-0.337666	0.702662	-0.287876	0.227062	blue	0.74598	-0.654153	-0.397564	-0.574534	-0.476947	-0.659936	-0.676917	-0.00639705	-0.267158	-0.456974	-0.670726	-0.128881	-0.502723	-0.666783	-0.524791	-0.544381	-0.227669	0.214362	0.0342914	-0.564179	0.430982	0.00533711	0.0210141	0.200615	0.0507146	0.116924	0.0195297	0.0156131	0.984258	0.401224	0.135303	0.0169669	0.689753	0.0957501	0.0178728	0.0798054	0.0672572	0.47668
850820	YLR129W	DIP2	Nucleolar protein; specifically associated with the U3 snoRNA, part of the large ribonucleoprotein complex known as the small subunit (SSU) processome, required for 18S rRNA biogenesis, part of the active pre-rRNA processing complex	0.424377	0.982852	0.50939	-0.458905	0.405202	-0.620359	-0.0013741	blue	0.729423	-0.493123	-0.372402	-0.537789	-0.493126	-0.582298	-0.627446	0.16399	-0.16685	-0.306673	-0.609103	0.113606	-0.406701	-0.639179	-0.448139	-0.435698	-0.0973396	0.340404	0.162525	-0.811837	0.196829	0.00709783	0.103308	0.233213	0.0713157	0.103306	0.0469681	0.0289548	0.610555	0.604258	0.332277	0.0355313	0.725178	0.189511	0.0252386	0.143997	0.156835	0.763454
850826	YLR135W	SLX4	Endonuclease involved in processing DNA; acts during recombination, repair; promotes template switching during break-induced replication (BIR), causing non-reciprocal translocations (NRTs); cleaves branched structures in complex with Slx1p; involved in interstrand cross-link repair, Rad1p/Rad10p-dependent removal of 3'-nonhomologous tails during DSBR via single-strand annealing; relative distribu…	0.584249	0.926834	0.795199	-0.094195	0.484283	-0.477464	0.0403695	blue	0.592251	-0.588284	-0.476948	-0.671426	-0.592441	-0.637778	-0.662815	0.169414	-0.331159	-0.449279	-0.708947	-0.125487	-0.525142	-0.712305	-0.580587	-0.572508	-0.1936	0.152592	-0.0477614	-0.77419	0.339122	0.042456	0.0442158	0.116924	0.0168096	0.0423733	0.0256632	0.0188199	0.59863	0.293042	0.142856	0.00983939	0.697577	0.0795676	0.00934319	0.0477765	0.0517256	0.546583
850827	YLR136C	TIS11	mRNA-binding protein expressed during iron starvation; binds to a sequence element in the 3'-untranslated regions of specific mRNAs to mediate their degradation; involved in iron homeostasis; protein increases in abundance and relative distribution to the nucleus increases upon DNA replication stress; TIS11 has a paralog, CTH1, that arose from the whole genome duplication	-0.00966892	0.816195	0.446575	-0.514557	0.54954	-0.323897	0.323364	blue	0.885958	-0.254446	0.0686959	-0.147561	-0.0176177	-0.254672	-0.269933	0.268698	0.179345	-0.00812228	-0.271306	0.270125	-0.0288539	-0.243624	-0.0840794	-0.122688	0.243285	0.58591	0.472979	-0.443487	0.0306689	0.00012508	0.424823	0.832003	0.647199	0.956662	0.424399	0.396161	0.39841	0.577032	0.980013	0.393669	0.395812	0.929071	0.44544	0.795024	0.70405	0.446093
850829	YLR138W	NHA1	Na+/H+ antiporter; involved in sodium and potassium efflux through the plasma membrane; required for alkali cation tolerance at acidic pH	0.104575	0.919534	0.46703	-0.513049	0.574183	-0.41216	0.0805406	blue	0.76093	-0.439512	-0.189502	-0.36155	-0.281291	-0.455125	-0.473736	0.173065	-0.0204383	-0.0962973	-0.478657	0.260023	-0.209578	-0.457683	-0.224509	-0.281663	0.0898433	0.534846	0.378522	-0.603462	0.0645007	0.0040506	0.152825	0.555267	0.248187	0.375784	0.137094	0.119762	0.590655	0.949731	0.765924	0.115432	0.414388	0.513277	0.13462	0.482984	0.375126	0.781264
850832	YLR141W	RRN5	Protein involved in transcription of rDNA by RNA polymerase I; transcription factor, member of UAF (upstream activation factor) family along with Rrn9p and Rrn10p	0.0412952	-0.768072	-0.142213	0.797998	-0.342739	0.505225	0.0941139	blue	-0.755515	0.307186	0.14887	0.31584	0.22885	0.358899	0.347097	-0.176827	-0.0682037	0.0720528	0.430987	-0.315942	0.17818	0.365449	0.142125	0.157207	-0.023986	-0.55495	-0.324137	0.614217	0.033217	0.00448586	0.331427	0.644253	0.317269	0.474334	0.251929	0.268983	0.582478	0.833192	0.823904	0.161881	0.317105	0.579549	0.242744	0.659491	0.625591	0.941017
850837	YLR145W	RMP1	Subunit of RNase MRP; RNase MRP processes pre-rRNA and has a role in cell cycle-regulated degradation of daughter cell-specific mRNAs; unlike most subunits, not shared between RNase MRP and nuclear RNase P	0.325983	0.926403	0.487355	-0.426853	0.434116	-0.544659	-0.0749077	blue	0.605364	-0.487392	-0.355347	-0.494302	-0.464707	-0.550614	-0.58592	0.130976	-0.179416	-0.191207	-0.570652	0.20526	-0.341084	-0.589102	-0.360049	-0.392756	-0.0366466	0.385601	0.236523	-0.746373	0.0978795	0.0369923	0.108005	0.256993	0.102359	0.127979	0.063569	0.0452889	0.684935	0.576879	0.551647	0.0526644	0.52219	0.277922	0.0438489	0.250301	0.206615	0.909976
850838	YLR146C	SPE4	Spermine synthase; required for the biosynthesis of spermine and also involved in biosynthesis of pantothenic acid	0.285681	0.969195	0.485985	-0.521507	0.415156	-0.60406	0.0246631	blue	0.828964	-0.391434	-0.225268	-0.419676	-0.347848	-0.464296	-0.499108	0.281729	-0.0128482	-0.184316	-0.510614	0.223653	-0.267673	-0.514426	-0.312378	-0.308581	0.0457238	0.492022	0.303066	-0.7629	0.0948687	0.000858421	0.208283	0.481466	0.17441	0.267879	0.128362	0.0985506	0.375008	0.968388	0.566338	0.0898221	0.484699	0.400281	0.0870496	0.322892	0.329122	0.88779
850839	YLR147C	SMD3	Core Sm protein Sm D3; part of heteroheptameric complex (with Smb1p, Smd1p, Smd2p, Sme1p, Smx3p, and Smx2p) that is part of the spliceosomal U1, U2, U4, and U5 snRNPs; homolog of human Sm D3	0.457075	0.977401	0.671119	-0.239343	0.582436	-0.436239	0.0115613	blue	0.677823	-0.584651	-0.415052	-0.616417	-0.517605	-0.635091	-0.657959	0.17021	-0.28439	-0.384276	-0.686145	-0.0201466	-0.473802	-0.678281	-0.522361	-0.545486	-0.150188	0.268927	0.0871469	-0.722421	0.315331	0.0154218	0.0458721	0.179703	0.0327929	0.0847821	0.0264917	0.0200281	0.596888	0.37032	0.21746	0.013745	0.950447	0.119703	0.0153258	0.0814653	0.0665933	0.641288
850868	YLR170C	APS1	Small subunit of the clathrin-associated adaptor complex AP-1; AP-1 is involved in protein sorting at the trans-Golgi network; homolog of the sigma subunit of the mammalian clathrin AP-1 complex	-0.826489	-0.80301	-0.620238	0.0477538	-0.137836	0.66379	0.0729494	blue	-0.490291	0.464209	0.54779	0.691639	0.684483	0.607732	0.662434	-0.1742	0.336573	0.589681	0.66403	0.256585	0.599644	0.739665	0.69608	0.578144	0.332295	0.0873346	0.278893	0.876451	-0.398898	0.105611	0.128443	0.0652221	0.0127144	0.0140686	0.0360621	0.0189127	0.588182	0.284738	0.0435906	0.0185262	0.420807	0.0393099	0.00596447	0.0119241	0.0489474	0.291289
850869	YLR172C	DPH5	Methyltransferase required for synthesis of diphthamide; diphthamide is a modified histidine residue of translation elongation factor 2 (Eft1p or Eft2p); not essential for viability; GFP-Dph5p fusion protein localizes to the cytoplasm	0.375337	0.97049	0.597969	-0.359856	0.651087	-0.359813	0.175877	blue	0.743586	-0.617058	-0.391092	-0.595281	-0.470804	-0.664538	-0.671903	0.0552847	-0.266961	-0.418356	-0.686244	-0.0561258	-0.482232	-0.675429	-0.529494	-0.557223	-0.192217	0.25253	0.0821934	-0.629979	0.371914	0.00556879	0.0325605	0.208717	0.0411461	0.122391	0.0184042	0.0167031	0.864501	0.401584	0.175911	0.0137258	0.862456	0.112353	0.0159309	0.0766583	0.0598142	0.549509
850872	YLR175W	CBF5	Pseudouridine synthase catalytic subunit of box H/ACA snoRNPs; acts on large and small rRNAs, on snRNA U2, and on some mRNAs; mutations in human ortholog dyskerin cause the disorder dyskeratosis congenita; small nucleolar ribonucleoprotein particles are also known as snoRNPs	0.536843	0.989895	0.645185	-0.322194	0.411991	-0.609148	0.0394105	blue	0.725119	-0.513569	-0.403117	-0.599974	-0.526751	-0.60659	-0.645102	0.2105	-0.217932	-0.381841	-0.655884	0.0177233	-0.458368	-0.679118	-0.523342	-0.501007	-0.131327	0.273462	0.0834777	-0.82978	0.26555	0.0076195	0.0876681	0.19382	0.0391735	0.0784833	0.0365085	0.0235002	0.511382	0.496226	0.220638	0.0205615	0.956402	0.133963	0.0151515	0.0807926	0.0970723	0.68413
850873	YLR176C	RFX1	Major transcriptional repressor of DNA-damage-regulated genes; recruits repressors Tup1p and Cyc8p to their promoters; involved in DNA damage and replication checkpoint pathway; similar to a family of mammalian DNA binding RFX1-4 proteins	0.581244	0.694009	0.681066	0.21832	0.698871	0.000845323	0.292236	blue	0.395969	-0.689536	-0.514383	-0.636066	-0.564085	-0.688361	-0.713655	-0.165009	-0.49519	-0.688024	-0.653979	-0.542189	-0.642679	-0.699733	-0.726044	-0.715997	-0.433173	-0.267741	-0.346104	-0.352746	0.705041	0.202594	0.0131019	0.0870804	0.0261889	0.0560813	0.0133222	0.00914907	0.608308	0.101648	0.0133859	0.02106	0.0685888	0.0242006	0.0113018	0.00750509	0.00881946	0.159528
850883	YLR186W	EMG1	Methyltransferase for rRNA; methylates pseudouridine 18S rRNA residue 1191; member of the SPOUT methyltransferase family; required for maturation of 18S rRNA and for 40S ribosomal subunit production independent of methyltransferase activity; forms homodimers; human ortholog is mutated in Bowen-Conradi syndrome, and equivalent yeast mutation affects Emg1p dimerization and localization but not meth…	0.482729	0.996646	0.604126	-0.371468	0.479219	-0.55609	0.0332283	blue	0.742805	-0.558583	-0.421648	-0.620576	-0.532596	-0.638638	-0.669315	0.165194	-0.246476	-0.409364	-0.689625	-0.00491345	-0.490233	-0.694896	-0.535862	-0.525914	-0.17661	0.275001	0.0716881	-0.795075	0.305956	0.00564597	0.0590608	0.172183	0.0313051	0.0746294	0.0254019	0.0172871	0.607901	0.439961	0.186348	0.0130854	0.987909	0.105659	0.0121312	0.0725337	0.0790458	0.58295
850893	YLR196W	PWP1	Protein with WD-40 repeats involved in rRNA processing; associates with trans-acting ribosome biogenesis factors; similar to beta-transducin superfamily	0.512072	0.980119	0.561565	-0.391591	0.377169	-0.639411	-0.0387251	blue	0.691361	-0.537465	-0.458189	-0.626421	-0.58273	-0.635214	-0.670742	0.160305	-0.232172	-0.393805	-0.682662	0.0282837	-0.48833	-0.710055	-0.529975	-0.500425	-0.180133	0.263002	0.0511672	-0.853337	0.251677	0.0127651	0.0715195	0.134135	0.0292969	0.0467653	0.0264532	0.0169633	0.618708	0.467763	0.205297	0.0144296	0.93047	0.107227	0.00967367	0.0763412	0.0975242	0.57533
850894	YLR197W	NOP56	Essential evolutionarily-conserved nucleolar protein; component of the box C/D snoRNP complexes that direct 2'-O-methylation of pre-rRNA during its maturation; overexpression causes spindle orientation defects	0.595365	0.969295	0.640523	-0.309787	0.318346	-0.678362	-0.0258017	blue	0.691756	-0.490526	-0.438099	-0.632537	-0.568137	-0.605605	-0.641952	0.24	-0.223155	-0.399246	-0.673081	0.00914391	-0.477205	-0.697296	-0.545162	-0.502715	-0.153646	0.245468	0.0340111	-0.889786	0.246003	0.0126932	0.105419	0.154303	0.0272969	0.0539555	0.0368972	0.0244135	0.452447	0.485696	0.198543	0.0164423	0.9775	0.116699	0.0117142	0.0667874	0.0957555	0.633539
850902	YLR205C	HMX1	ER localized heme oxygenase; involved in heme degradation during iron starvation and in the oxidative stress response; expression is regulated by AFT1 and oxidative stress; relocates to the perinuclear region in the presence of oxidants	0.173813	0.817992	0.536285	-0.400761	0.573611	-0.284648	0.386019	blue	0.892407	-0.399245	-0.0954878	-0.331074	-0.192964	-0.387758	-0.392848	0.18312	-0.0137086	-0.329573	-0.429176	-0.0577946	-0.285429	-0.406774	-0.326833	-0.307863	-0.0446221	0.325551	0.145942	-0.450657	0.318552	9.45e-05	0.198544	0.767844	0.293175	0.547927	0.212967	0.2065	0.568903	0.966272	0.295501	0.163847	0.858403	0.368497	0.189425	0.299775	0.330307	0.890479
850912	YLR215C	CDC123	Assembly factor for the eIF2 translation initiation factor complex; regulates translational initiation; conserved residues of this ATP-Grasp protein that bind to ATP-Mg2+ in the pombe ortholog are required for complex assembly in budding yeast; interaction with eIF2 subunit Gcd11p facilitates complex assembly and activity; required for the START transition and timely progression through G2; regul…	0.497307	0.953451	0.529793	-0.295572	0.610566	-0.378244	-0.0161156	blue	0.574422	-0.753373	-0.622632	-0.758965	-0.697625	-0.81137	-0.830652	-0.0844487	-0.463556	-0.574098	-0.826816	-0.187242	-0.675473	-0.838372	-0.683553	-0.696267	-0.413285	0.0739311	-0.123189	-0.686392	0.488938	0.0507701	0.00466745	0.0305879	0.00420468	0.0116578	0.00135721	0.000819334	0.79414	0.129052	0.0509309	0.00091019	0.560081	0.0159214	0.000657829	0.014252	0.0118917	0.181751
850917	YLR220W	CCC1	Vacuolar Fe2+/Mn2+ transporter; suppresses respiratory deficit of yfh1 mutants, which lack the ortholog of mammalian frataxin, by preventing mitochondrial iron accumulation; relative distribution to the vacuole decreases upon DNA replication stress	0.420591	0.957864	0.574441	-0.40112	0.326491	-0.673185	-0.127462	blue	0.715648	-0.426072	-0.355796	-0.55349	-0.479657	-0.526276	-0.544028	0.329704	-0.103264	-0.234387	-0.618989	0.185172	-0.347648	-0.606424	-0.394016	-0.384278	-0.0202483	0.434105	0.197236	-0.864359	0.0855903	0.0088681	0.167253	0.25635	0.0619157	0.114565	0.0788018	0.0674705	0.295298	0.749452	0.463404	0.0318668	0.564504	0.268173	0.036574	0.205033	0.217458	0.950198
850918	YLR221C	RSA3	Protein with a likely role in ribosomal maturation; required for accumulation of wild-type levels of large (60S) ribosomal subunits; binds to the helicase Dbp6p in pre-60S ribosomal particles in the nucleolus	0.447687	0.985663	0.595324	-0.416246	0.382848	-0.641986	0.0018635	blue	0.741829	-0.478788	-0.365745	-0.5599	-0.493009	-0.56846	-0.596042	0.23659	-0.151839	-0.300695	-0.627406	0.117481	-0.397224	-0.639563	-0.445799	-0.431173	-0.0732949	0.366598	0.158656	-0.836565	0.169881	0.00574355	0.115318	0.242332	0.0583379	0.1034	0.0537884	0.0408213	0.459089	0.637584	0.342267	0.0289681	0.71614	0.201036	0.0251234	0.146358	0.16168	0.820912
850919	YLR222C	UTP13	Nucleolar protein; component of the small subunit (SSU) processome containing the U3 snoRNA that is involved in processing of pre-18S rRNA	0.494908	0.983665	0.559118	-0.403882	0.367735	-0.654724	-0.0476348	blue	0.716129	-0.501943	-0.420522	-0.598067	-0.547472	-0.603558	-0.639989	0.204071	-0.190431	-0.356499	-0.656257	0.065862	-0.448726	-0.678909	-0.497676	-0.468796	-0.133566	0.304078	0.0935772	-0.862501	0.216476	0.00880119	0.0963494	0.173453	0.0399668	0.0654107	0.0377133	0.0249956	0.524656	0.553293	0.255344	0.0204648	0.838851	0.143408	0.0151948	0.0996756	0.124214	0.678997
850920	YLR223C	IFH1	Coactivator, regulates transcription of ribosomal protein (RP) genes; recruited to RP gene promoters during optimal growth conditions via Fhl1p; subunit of CURI, a complex that coordinates RP production and pre-rRNA processing; regulated by acetylation and phosphorylation at different growth states via TORC1 signaling; IFH1 has a paralog, CRF1, that arose from the whole genome duplication	0.324353	0.986666	0.53144	-0.491626	0.485916	-0.552433	0.079963	blue	0.804517	-0.49113	-0.306252	-0.494633	-0.419703	-0.548591	-0.583151	0.180964	-0.115371	-0.278463	-0.586038	0.122181	-0.365099	-0.590038	-0.396188	-0.398041	-0.0539869	0.406001	0.21413	-0.748456	0.195727	0.0016025	0.104926	0.332974	0.102093	0.17438	0.0647503	0.0465689	0.573541	0.721058	0.380806	0.0452349	0.705225	0.243229	0.0434318	0.202321	0.200027	0.867657
850921	YLR224W	UCC1	F-box protein and component of SCF ubiquitin ligase complexes; involved in ubiquitin-dependent protein catabolism; readily monoubiquitinated in vitro by SCF-Ubc4 complexes; SCF-Ucc1 regulates level of Cit2 citrate synthase protein to maintain citrate homeostasis, acts as metabolic switch for glyoxylate cycle; UCC1 transcription is downregulated in cells grown on C2-compounds	0.374949	0.98546	0.572992	-0.394562	0.608369	-0.425641	0.104016	blue	0.763037	-0.598833	-0.396009	-0.592582	-0.487263	-0.647775	-0.66845	0.0926075	-0.24235	-0.40654	-0.681515	-0.0298328	-0.478433	-0.671442	-0.513689	-0.528091	-0.180209	0.282544	0.0911619	-0.690134	0.344585	0.00389021	0.0396468	0.202545	0.0423117	0.108112	0.0227449	0.0174856	0.774685	0.447896	0.189704	0.0146603	0.92667	0.115627	0.016806	0.0875811	0.0775876	0.575168
850923	YLR226W	BUR2	Cyclin for the Sgv1p (Bur1p) protein kinase; Sgv1p and Bur2p comprise the CDK-cyclin BUR kinase complex which is involved in transcriptional regulation through its phosphorylation of the carboxy-terminal domain (CTD) of the largest subunit of RNA polymerase II (Rpo21p); BUR kinase is also involved in the recruitment of Spt6p to the CTD at the onset of transcription	0.283166	0.957944	0.548704	-0.423606	0.649481	-0.365947	0.187295	blue	0.762086	-0.586153	-0.332977	-0.51287	-0.418547	-0.603513	-0.634433	0.0389446	-0.210628	-0.349	-0.61332	-0.00133164	-0.424044	-0.608157	-0.44417	-0.474243	-0.132398	0.307665	0.148562	-0.617422	0.321453	0.00396198	0.0451822	0.290239	0.0881742	0.175694	0.0377314	0.0266973	0.904353	0.51112	0.26619	0.0339333	0.996723	0.169502	0.0358968	0.148016	0.119311	0.681673
850924	YLR227C	ADY4	Structural component of the meiotic outer plaque; outer plaque is a membrane-organizing center that assembles on the cytoplasmic face of the spindle pole body during meiosis II and triggers the formation of the prospore membrane	0.40268	0.972852	0.590354	-0.373084	0.560486	-0.458346	0.00803022	blue	0.746196	-0.60538	-0.438034	-0.647722	-0.547426	-0.653149	-0.652829	0.144804	-0.266977	-0.456853	-0.725209	-0.0642216	-0.523551	-0.703042	-0.544937	-0.539116	-0.234832	0.260759	0.0136199	-0.727419	0.350055	0.00531653	0.0369863	0.154371	0.0227598	0.0654375	0.02128	0.0213651	0.653423	0.401555	0.13542	0.00760836	0.84282	0.0806491	0.0107592	0.0669226	0.0704856	0.462531
850938	YLR237W	THI7	Plasma membrane transporter responsible for the uptake of thiamine; contributes to uptake of 5-aminoimidazole-4-carboxamide-1-beta-D-ribofuranoside (acadesine); member of the major facilitator superfamily of transporters; mutation of human ortholog causes thiamine-responsive megaloblastic anemia	0.321253	0.949382	0.466056	-0.529715	0.302762	-0.691976	0.012071	blue	0.797527	-0.330009	-0.214698	-0.387726	-0.349687	-0.429825	-0.472057	0.299928	0.0466524	-0.134106	-0.464578	0.278126	-0.218626	-0.495349	-0.282378	-0.25842	0.0980413	0.496228	0.320502	-0.816451	0.014406	0.00188635	0.294825	0.502797	0.213008	0.265185	0.163141	0.121263	0.343561	0.885524	0.67776	0.128099	0.381407	0.494821	0.101522	0.373862	0.417374	0.761792
850944	YLR243W	GPN3	Putative GTPase with a role in biogenesis of RNA pol II and polIII; may be involved in assembly of RNA polymerases II and III and in their transport into the nucleus; may have a role in sister chromatid cohesion; SWAT-GFP and mCherry fusion proteins localize to the endoplasmic reticulum and vacuole respectively; contains a Gly-Pro-Asn motif in the G domain; similar to Npa3p and Gpn2p	0.375528	0.987804	0.548215	-0.431437	0.529485	-0.505965	9.02e-05	blue	0.752362	-0.570055	-0.406292	-0.601457	-0.505793	-0.631043	-0.649472	0.153532	-0.225576	-0.369534	-0.688569	0.0379051	-0.46582	-0.67143	-0.487134	-0.497911	-0.16429	0.336503	0.117129	-0.74685	0.278762	0.00475506	0.052969	0.190001	0.0385644	0.0934136	0.0277762	0.0222745	0.633793	0.48085	0.237116	0.0132829	0.906896	0.126947	0.0168088	0.10822	0.0994904	0.609894
850945	YLR244C	MAP1	Methionine aminopeptidase; catalyzes the cotranslational removal of N-terminal methionine from nascent polypeptides; function is partially redundant with that of Map2p	0.382244	0.979094	0.605513	-0.335499	0.658712	-0.364049	0.123582	blue	0.713539	-0.655058	-0.446032	-0.630389	-0.529058	-0.694827	-0.703504	0.0387798	-0.287344	-0.435246	-0.719516	-0.0707619	-0.511326	-0.712048	-0.546806	-0.572876	-0.217008	0.241404	0.0519594	-0.650389	0.377231	0.00916565	0.0207764	0.146121	0.0279877	0.0769458	0.0121434	0.0106851	0.904756	0.365151	0.157315	0.00834104	0.827017	0.0892995	0.00938062	0.0658051	0.0515413	0.498099
850946	YLR245C	CDD1	Cytidine deaminase; catalyzes the modification of cytidine to uridine in vitro but native RNA substrates have not been identified, localizes to both the nucleus and cytoplasm	0.311147	0.911255	0.572008	-0.293242	0.679441	-0.280465	0.248583	blue	0.732594	-0.54596	-0.284074	-0.461212	-0.363032	-0.563553	-0.602311	0.0451363	-0.188767	-0.347792	-0.549663	-0.0555081	-0.383921	-0.560355	-0.443003	-0.470461	-0.0960848	0.246572	0.137286	-0.544743	0.355615	0.00673109	0.0663096	0.370876	0.131257	0.246109	0.0563646	0.0382168	0.889224	0.556832	0.267961	0.0641226	0.863958	0.217922	0.0580898	0.149212	0.122701	0.766428
850951	YLR249W	YEF3	Translation elongation factor 3; contains two ABC cassettes; binds and hydrolyzes ATP; YEF3 has a paralog, HEF3, that arose from the whole genome duplication	0.554088	0.978111	0.570657	-0.34677	0.418395	-0.5912	0.0365425	blue	0.682978	-0.555373	-0.455741	-0.620304	-0.572551	-0.653168	-0.703956	0.105338	-0.275344	-0.435642	-0.672386	-0.0333332	-0.513871	-0.716393	-0.570225	-0.542128	-0.208718	0.192875	0.0242328	-0.816231	0.324382	0.0143664	0.0608491	0.136495	0.0314008	0.0517043	0.021275	0.0106128	0.744567	0.386384	0.156895	0.0165958	0.91809	0.0874493	0.00876466	0.0528823	0.0686262	0.515048
850958	YLR256W	HAP1	Zinc finger transcription factor; involved in the complex regulation of gene expression in response to levels of heme and oxygen; localizes to the mitochondrion as well as to the nucleus; the S288C sequence differs from other strain backgrounds due to a Ty1 insertion in the carboxy terminus	0.186146	0.914494	0.493367	-0.369994	0.728921	-0.234419	0.100628	blue	0.704697	-0.615854	-0.351608	-0.517429	-0.4129	-0.615625	-0.616825	0.0396264	-0.215578	-0.324201	-0.632852	0.0126055	-0.409753	-0.603566	-0.4165	-0.47921	-0.144718	0.339897	0.165075	-0.497543	0.320289	0.0104954	0.0329983	0.262388	0.0849065	0.182199	0.0330817	0.0326446	0.902686	0.501005	0.303914	0.0271966	0.968985	0.18589	0.0377102	0.178035	0.114952	0.653618
850965	YLR261C	VPS63	Putative protein of unknown function; not conserved in closely related Saccharomyces species; 98% of ORF overlaps the verified gene YPT6; deletion causes a vacuolar protein sorting defect; decreased levels of protein in enolase deficient mutant	-0.4883	-0.847967	-0.578181	0.305515	-0.329641	0.562957	-0.03664	blue	-0.637094	0.484533	0.368489	0.539411	0.482027	0.515133	0.593313	-0.142241	0.30762	0.415173	0.584634	0.0789279	0.500028	0.589638	0.483248	0.452796	0.217444	-0.176373	0.00852482	0.754137	-0.330057	0.0258721	0.1104	0.238549	0.0703023	0.112528	0.0865418	0.0419937	0.659226	0.330709	0.179563	0.0458801	0.807368	0.0978332	0.0436098	0.111488	0.139371	0.497215
850968	YLR263W	RED1	Protein component of the synaptonemal complex axial elements; involved in chromosome segregation during the first meiotic division; critical for coupling checkpoint signaling to SC formation; promotes interhomolog recombination by phosphorylating Hop1p; also interacts with Mec3p and Ddc1p	0.677143	0.902269	0.579773	-0.181278	0.347261	-0.575254	-0.106531	blue	0.503594	-0.589361	-0.592771	-0.7258	-0.717028	-0.711084	-0.739027	0.0660755	-0.367273	-0.529835	-0.737846	-0.1492	-0.599541	-0.798725	-0.672726	-0.618489	-0.319685	0.021752	-0.164783	-0.84178	0.360182	0.0950826	0.0437332	0.0422291	0.00753513	0.00867727	0.0095214	0.00603081	0.838335	0.240221	0.0764329	0.00615501	0.643511	0.0393525	0.00183515	0.0165204	0.0320455	0.311089
850982	YLR276C	DBP9	DEAD-box protein required for 27S rRNA processing; exhibits DNA, RNA and DNA/RNA helicase activities; ATPase activity shows preference for DNA over RNA; DNA helicase activity abolished by mutation in RNA-binding domain	0.563172	0.969223	0.571585	-0.374738	0.321231	-0.67986	-0.027107	blue	0.689174	-0.485677	-0.427922	-0.607961	-0.553281	-0.606921	-0.649954	0.195588	-0.216205	-0.376563	-0.653558	0.0413442	-0.463299	-0.686276	-0.528083	-0.490918	-0.149106	0.25298	0.063273	-0.882173	0.231314	0.0131695	0.109437	0.165218	0.035973	0.0620349	0.036379	0.0221422	0.542391	0.499731	0.227618	0.0211713	0.898486	0.129293	0.0137197	0.077593	0.105099	0.643722
851000	YLR293C	GSP1	Ran GTPase; GTP binding protein (mammalian Ranp homolog) involved in the maintenance of nuclear organization, RNA processing and transport; regulated by Srm1p, Rna1p, Yrb1p, Yrb2p, Yrp4p, Yrb30p, Cse1p and Kap95p; GSP1 has a paralog, GSP2, that arose from the whole genome duplication	0.538296	0.965845	0.684945	-0.242177	0.591381	-0.403557	0.119285	blue	0.683546	-0.669016	-0.507348	-0.720556	-0.595034	-0.731889	-0.736785	0.0629705	-0.383467	-0.553334	-0.783854	-0.189363	-0.609265	-0.77303	-0.658442	-0.658811	-0.316987	0.12277	-0.0838471	-0.702849	0.466017	0.0142535	0.0173554	0.0922447	0.00820342	0.0412515	0.00681132	0.00626824	0.84585	0.218512	0.0620045	0.00255137	0.555563	0.0354689	0.00319398	0.0199056	0.0198123	0.315419
851017	YLR308W	CDA2	Chitin deacetylase; together with Cda1p involved in the biosynthesis ascospore wall component, chitosan; required for proper rigidity of the ascospore wall	0.704631	0.768549	0.543007	-0.15495	0.327615	-0.436709	0.243706	blue	0.55947	-0.54473	-0.475673	-0.635561	-0.54479	-0.644385	-0.711534	-0.0442128	-0.4396	-0.657731	-0.650082	-0.364716	-0.651585	-0.699763	-0.714275	-0.648119	-0.434167	-0.148763	-0.263763	-0.636155	0.590878	0.0585736	0.0670468	0.118045	0.0263453	0.0670111	0.0237058	0.00945556	0.891478	0.152733	0.0200862	0.0221072	0.243761	0.021699	0.0112969	0.00906097	0.0226489	0.158464
851027	YLR316C	TAD3	Subunit of tRNA-specific adenosine-34 deaminase; forms a heterodimer with Tad2p that converts adenosine to inosine at the wobble position of several tRNAs	0.539008	0.973452	0.60206	-0.31958	0.413538	-0.591796	0.0411717	blue	0.66978	-0.529941	-0.438081	-0.603903	-0.539161	-0.636479	-0.685473	0.139312	-0.232311	-0.362338	-0.660967	0.0262514	-0.457133	-0.6916	-0.52715	-0.518508	-0.134022	0.251473	0.0909421	-0.818234	0.259911	0.017181	0.0763633	0.154322	0.0375747	0.0704579	0.0260614	0.0138753	0.665879	0.467488	0.24708	0.0192733	0.935456	0.13515	0.0127215	0.0782155	0.0841452	0.677952
851028	YLR318W	EST2	Reverse transcriptase subunit of the telomerase holoenzyme; essential for telomerase core catalytic activity, involved in other aspects of telomerase assembly and function; mutations in human homolog are associated with aplastic anemia	0.522513	0.983397	0.624968	-0.278846	0.557066	-0.459433	0.103651	blue	0.67326	-0.645878	-0.496752	-0.660298	-0.600786	-0.711016	-0.744965	0.0337113	-0.32524	-0.494628	-0.722148	-0.121622	-0.560956	-0.756438	-0.612618	-0.602204	-0.260131	0.147649	-0.0272779	-0.732773	0.40845	0.0164029	0.0232791	0.100405	0.0194393	0.0388393	0.00953152	0.00543444	0.917164	0.302277	0.102097	0.00799604	0.706521	0.0577626	0.00440929	0.0341956	0.0382602	0.414186
851040	YLR329W	REC102	Protein involved in early stages of meiotic recombination; required for chromosome synapsis; forms a complex with Rec104p and Spo11p necessary during the initiation of recombination	0.731239	0.743808	0.743468	0.277648	0.38402	-0.355155	-0.167454	blue	0.271318	-0.587983	-0.621575	-0.726372	-0.700868	-0.660099	-0.695951	0.133979	-0.449933	-0.506755	-0.717018	-0.264064	-0.58268	-0.749101	-0.659111	-0.648486	-0.297458	-0.0668699	-0.226965	-0.667679	0.41002	0.393646	0.0443514	0.0309552	0.00746485	0.0111135	0.0194888	0.0119466	0.67805	0.142203	0.0926894	0.00867864	0.406906	0.0467891	0.00504612	0.0197364	0.022547	0.347742
851042	YLR332W	MID2	O-glycosylated plasma membrane protein; acts as a sensor for cell wall integrity signaling and activates the pathway; interacts with Rom2p, a guanine nucleotide exchange factor for Rho1p, and with cell integrity pathway protein Zeo1p; MID2 has a paralog, MTL1, that arose from the whole genome duplication	0.298676	0.933354	0.64248	-0.294118	0.627443	-0.363191	0.0407688	blue	0.735186	-0.574818	-0.354743	-0.561572	-0.456442	-0.571072	-0.578569	0.183028	-0.214125	-0.3632	-0.650249	-0.0293401	-0.435479	-0.60846	-0.441943	-0.464294	-0.132807	0.329989	0.0962943	-0.642606	0.303659	0.00644197	0.050574	0.257859	0.0574291	0.135817	0.0524508	0.0487421	0.569102	0.503965	0.245875	0.0220617	0.927879	0.157067	0.0357796	0.150303	0.128364	0.680736
851049	YLR336C	SGD1	Essential nuclear protein; required for biogenesis of the small ribosomal subunit; has a possible role in the osmoregulatory glycerol response; putative homolog of human NOM1 which is implicated in acute myeloid leukemia	0.482819	0.988747	0.535915	-0.382808	0.481171	-0.548842	-0.040597	blue	0.673941	-0.597984	-0.487041	-0.648872	-0.590801	-0.683783	-0.720391	0.0921042	-0.292012	-0.420045	-0.71589	-0.00615387	-0.524235	-0.733317	-0.557724	-0.553785	-0.222942	0.238867	0.0452459	-0.798692	0.313113	0.0162536	0.0400015	0.108297	0.0224402	0.0430937	0.0142065	0.00822505	0.775882	0.35706	0.173992	0.00883431	0.984856	0.0801829	0.00664942	0.0595357	0.0617475	0.486125
851055	YLR342W	FKS1	Catalytic subunit of 1,3-beta-D-glucan synthase; functionally redundant with alternate catalytic subunit Gsc2p; binds to regulatory subunit Rho1p; involved in cell wall synthesis and maintenance; localizes to sites of cell wall remodeling; FKS1 has a paralog, GSC2, that arose from the whole genome duplication	0.453806	0.862669	0.857473	-0.0339386	0.419095	-0.463729	0.15635	blue	0.683978	-0.392104	-0.221512	-0.443977	-0.359904	-0.401829	-0.427235	0.387249	-0.0985444	-0.255233	-0.491452	0.0198637	-0.290211	-0.495109	-0.36146	-0.350821	0.0540837	0.335441	0.149055	-0.663196	0.182285	0.0141681	0.207437	0.488999	0.148213	0.250505	0.195384	0.165972	0.21362	0.760601	0.423344	0.104663	0.951142	0.360171	0.101713	0.248314	0.263531	0.867421
851060	YLR346C	CIS1	Protein of unknown function found in mitochondria; expression is regulated by transcription factors involved in pleiotropic drug resistance, Pdr1p and Yrr1p; not an essential gene; YLR346C has a paralog, YGR035C, that arose from the whole genome duplication	-0.113497	0.628412	0.186818	-0.474933	0.349396	-0.337732	-0.23339	blue	0.344734	-0.312633	-0.193031	-0.234204	-0.226421	-0.328529	-0.326955	0.104011	0.0169647	0.213161	-0.346333	0.520908	-0.0252824	-0.307994	0.0236144	-0.104849	0.193666	0.612489	0.501153	-0.438985	-0.25039	0.272477	0.322477	0.547786	0.463764	0.479165	0.297127	0.299584	0.747691	0.958267	0.505932	0.27011	0.0824689	0.937835	0.330091	0.94193	0.745719	0.546444
851069	YLR355C	ILV5	Acetohydroxyacid reductoisomerase and mtDNA binding protein; involved in branched-chain amino acid biosynthesis and maintenance of wild-type mitochondrial DNA; found in mitochondrial nucleoids	0.220394	-0.529849	-0.16405	0.461249	-0.263592	0.310433	0.213508	blue	-0.446641	0.265158	0.154983	0.202327	0.226344	0.227477	0.179058	-0.21751	-0.163563	-0.111778	0.311886	-0.391989	0.0263627	0.260985	-0.0587606	-0.0124991	-0.132	-0.604551	-0.344919	0.347818	0.209756	0.145506	0.404891	0.63055	0.528281	0.479319	0.477062	0.577652	0.497081	0.611499	0.729452	0.323697	0.207582	0.935183	0.4126	0.856058	0.969247	0.682585
851087	YLR372W	ELO3	Elongase; involved in fatty acid and sphingolipid biosynthesis; synthesizes very long chain 20-26-carbon fatty acids from C18-CoA primers; involved in regulation of sphingolipid biosynthesis; lethality of the elo2 elo3 double null mutation is functionally complemented by human ELOVL1 and weakly complemented by human ELOVL3 or ELOV7	0.66784	0.791216	0.768501	0.0602996	0.399246	-0.385968	0.31224	blue	0.501463	-0.460993	-0.345411	-0.5101	-0.411889	-0.54267	-0.615384	0.0960004	-0.309088	-0.386024	-0.531595	-0.154188	-0.422426	-0.585846	-0.543189	-0.546467	-0.116427	0.0379776	0.00520186	-0.60126	0.374592	0.0967201	0.131464	0.271473	0.0902007	0.18338	0.0682954	0.0331702	0.766628	0.328286	0.215198	0.0752801	0.632326	0.171311	0.0453227	0.0679793	0.0660073	0.718596
851092	YLR377C	FBP1	Fructose-1,6-bisphosphatase; key regulatory enzyme in the gluconeogenesis pathway, required for glucose metabolism; undergoes either proteasome-mediated or autophagy-mediated degradation depending on growth conditions; glucose starvation results in redistribution to the periplasm; interacts with Vid30p	0.528199	0.795778	0.654677	-0.187609	0.21324	-0.603016	-0.165578	blue	0.567629	-0.327491	-0.332321	-0.588455	-0.421988	-0.46542	-0.44282	0.426742	-0.161965	-0.244494	-0.618022	0.104156	-0.335476	-0.550077	-0.422883	-0.420886	-0.0346407	0.325556	0.0963604	-0.810795	0.0809677	0.0542186	0.298746	0.291249	0.0441391	0.171801	0.127317	0.1494	0.166514	0.615031	0.443764	0.0322129	0.74735	0.286411	0.063881	0.170798	0.173042	0.914888
851100	YLR384C	IKI3	Subunit of Elongator complex; Elongator is required for modification of wobble nucleosides in tRNA; maintains structural integrity of Elongator; homolog of human IKAP, mutations in which cause familial dysautonomia (FD)	0.473652	0.982385	0.519002	-0.380401	0.516832	-0.505787	-0.0208415	blue	0.67763	-0.627191	-0.501698	-0.659912	-0.606023	-0.702519	-0.734565	0.0536415	-0.315223	-0.468661	-0.727716	-0.0596775	-0.557261	-0.748969	-0.585296	-0.57554	-0.271085	0.197072	-0.000645099	-0.763774	0.366353	0.0154625	0.0290395	0.0965385	0.0195355	0.0367318	0.0108437	0.00651029	0.868497	0.318267	0.124336	0.0073014	0.853833	0.0597929	0.00505813	0.0455752	0.0502177	0.39407
851101	YLR385C	SWC7	Protein of unknown function; component of the Swr1p complex that incorporates Htz1p into chromatin	0.537954	0.637625	0.64655	0.0873756	0.358758	-0.300966	0.212487	blue	0.307464	-0.558735	-0.484913	-0.521435	-0.568441	-0.546517	-0.626835	-0.125415	-0.362352	-0.466352	-0.527366	-0.304523	-0.511708	-0.606604	-0.526236	-0.490285	-0.273555	-0.122202	-0.222552	-0.52897	0.411516	0.330966	0.0589773	0.110079	0.0821037	0.053798	0.0659772	0.0291584	0.697743	0.247061	0.126456	0.0780715	0.335851	0.0890203	0.036503	0.0788289	0.105617	0.389603
851107	YLR390W-A	CCW14	Covalently linked cell wall glycoprotein; present in the inner layer of the cell wall	0.445891	0.919614	0.695342	-0.113573	0.548918	-0.40197	-0.016627	blue	0.678573	-0.527992	-0.373729	-0.568382	-0.494264	-0.555078	-0.575016	0.268115	-0.208682	-0.38972	-0.626156	-0.0672234	-0.433073	-0.624927	-0.488018	-0.48118	-0.118918	0.259501	0.0481239	-0.673315	0.317893	0.0152648	0.0776537	0.231419	0.0538284	0.10239	0.0610155	0.0504763	0.399474	0.515121	0.210459	0.029386	0.83556	0.159634	0.0298012	0.107485	0.113253	0.712798
851113	YLR397C	AFG2	ATPase of the CDC48/PAS1/SEC18 (AAA) family, forms a hexameric complex; is essential for pre-60S maturation and release of several preribosome maturation factors; releases Rlp24p from purified pre-60S particles in vitro; target of the ribosomal biosynthesis inhibitor diazaborine; may be involved in degradation of aberrant mRNAs	0.431379	0.988429	0.558153	-0.414086	0.469259	-0.560662	0.0607991	blue	0.746315	-0.537096	-0.385904	-0.559511	-0.509573	-0.60564	-0.6441	0.13657	-0.196909	-0.369599	-0.631237	0.0336559	-0.446828	-0.661569	-0.48756	-0.470618	-0.140454	0.292988	0.106837	-0.773993	0.268579	0.00530528	0.0717523	0.215353	0.0585511	0.0905894	0.0368831	0.0237879	0.672129	0.539614	0.237028	0.0277136	0.9173	0.145317	0.0191247	0.107865	0.122559	0.663284
851117	YLR401C	DUS3	Dihydrouridine synthase; member of a widespread family of conserved proteins including Smm1p, Dus1p, and Dus4p; contains a consensus oleate response element (ORE) in its promoter region; forms nuclear foci upon DNA replication stress	0.460182	0.994426	0.570961	-0.399038	0.481227	-0.556931	0.00936208	blue	0.742505	-0.564494	-0.428943	-0.618197	-0.544238	-0.639622	-0.67059	0.148422	-0.242049	-0.41426	-0.688045	-0.00610027	-0.495152	-0.696131	-0.53171	-0.516703	-0.18862	0.272412	0.0616533	-0.797312	0.305038	0.00567583	0.055864	0.164102	0.0321499	0.0673437	0.0251054	0.0169976	0.64526	0.448478	0.180619	0.0133818	0.984988	0.101679	0.0119152	0.0752048	0.0854212	0.557144
851124	YLR408C	BLS1	Subunit of the BLOC-1 complex involved in endosomal maturation; green fluorescent protein (GFP)-fusion protein localizes to the endosome; YLR408C is not an essential gene	-0.624545	-0.861118	-0.531979	0.337076	-0.100725	0.772533	-0.0697831	blue	-0.637665	0.299887	0.295174	0.455149	0.42497	0.456424	0.535498	-0.242359	0.112946	0.26969	0.473534	-0.107833	0.332847	0.550778	0.435941	0.369678	0.0295878	-0.229316	-0.121625	0.875676	-0.13024	0.0256975	0.34363	0.351635	0.13707	0.168473	0.135834	0.0727649	0.44788	0.726721	0.396603	0.119942	0.7387	0.29044	0.0634739	0.156578	0.236919	0.927271
851125	YLR409C	UTP21	Subunit of U3-containing 90S preribosome and SSU processome complexes; involved in production of 18S rRNA and assembly of small ribosomal subunit; synthetic defect with STI1 Hsp90 cochaperone; human homolog linked to glaucoma; Small Subunit processome is also known as SSU processome	0.445848	0.98645	0.548661	-0.442919	0.382751	-0.644776	0.0105012	blue	0.763833	-0.470613	-0.353496	-0.538721	-0.482899	-0.560993	-0.602933	0.217556	-0.145028	-0.318475	-0.605839	0.099492	-0.40234	-0.629824	-0.45058	-0.425058	-0.0862171	0.347098	0.151158	-0.83296	0.197931	0.00383087	0.122564	0.259656	0.0707324	0.111785	0.0577424	0.0379651	0.496988	0.652916	0.313025	0.0368045	0.758359	0.194763	0.0281715	0.14156	0.168375	0.789914
851129	YLR411W	CTR3	High-affinity copper transporter of the plasma membrane; acts as a trimer; gene is disrupted by a Ty2 transposon insertion in many laboratory strains of S. cerevisiae	0.422161	0.876428	0.727569	-0.0855392	0.655142	-0.247093	0.161547	blue	0.613798	-0.657747	-0.472561	-0.652086	-0.537189	-0.672205	-0.663833	0.0709532	-0.303158	-0.470481	-0.724872	-0.190868	-0.517625	-0.700406	-0.563756	-0.58896	-0.231273	0.159333	-0.0496661	-0.553231	0.422378	0.0337554	0.0200822	0.12081	0.0215642	0.0716935	0.0166358	0.0185736	0.826555	0.338131	0.122683	0.00765033	0.552366	0.0847681	0.01119	0.0562568	0.0439123	0.469537
851150	YLR430W	SEN1	ATP-dependent 5' to 3' RNA/DNA and DNA helicase; subunit of the exosome-associated Nrd1p complex that mediates 3' end formation of snRNAs, snoRNAs, CUTs and some mRNAs; helicase-independent role in transcription-coupled repair; coordinates replication with transcription, associating with moving forks and preventing errors that occur when forks encounter transcribed regions; homolog of Senataxin, …	0.377401	0.987387	0.583693	-0.402034	0.591332	-0.443709	0.120219	blue	0.770733	-0.599738	-0.394854	-0.588637	-0.496313	-0.641468	-0.663284	0.0918727	-0.238552	-0.415508	-0.675854	-0.0352958	-0.483762	-0.673581	-0.512349	-0.517437	-0.186068	0.278624	0.0793843	-0.69698	0.344604	0.00334485	0.0392713	0.203984	0.0440572	0.100754	0.0245561	0.0187061	0.776432	0.455262	0.179177	0.0158396	0.913283	0.111051	0.0163322	0.0885533	0.0849012	0.562588
851152	YLR432W	IMD3	Inosine monophosphate dehydrogenase; catalyzes the rate-limiting step in the de novo synthesis of GTP; member of a four-gene family in S. cerevisiae, constitutively expressed; IMD3 has a paralog, IMD4, that arose from the whole genome duplication	0.593822	0.853944	0.456069	-0.283985	0.312446	-0.554323	0.165476	blue	0.600362	-0.417629	-0.349435	-0.471762	-0.44486	-0.556026	-0.641579	0.0383776	-0.204355	-0.372444	-0.500714	-0.0377818	-0.406749	-0.599316	-0.523024	-0.479102	-0.136377	0.0887609	0.0470107	-0.722206	0.306433	0.0390136	0.176741	0.265553	0.121528	0.147312	0.0604824	0.0245235	0.90574	0.524065	0.233156	0.0973	0.907198	0.189455	0.039446	0.08101	0.115046	0.672569
851154	YLR435W	TSR2	Protein with a potential role in pre-rRNA processing	0.33195	0.926694	0.439752	-0.568813	0.228144	-0.747894	-0.116733	blue	0.756769	-0.348637	-0.284976	-0.462772	-0.425427	-0.453217	-0.475695	0.315206	-0.00282269	-0.175444	-0.532068	0.264018	-0.28068	-0.537743	-0.310865	-0.275154	0.0191026	0.481099	0.242157	-0.873781	0.00309553	0.00438206	0.266721	0.369291	0.129787	0.167967	0.138957	0.118026	0.318296	0.993054	0.585479	0.074972	0.40699	0.376865	0.0713447	0.325367	0.386726	0.953012
851164	YLR443W	ECM7	Putative integral membrane protein with a role in calcium uptake; non-essential protein; mutant has cell wall defects and Ca+ uptake deficiencies; transcription is induced under conditions of zinc deficiency	0.0551069	0.896448	0.438438	-0.544432	0.497616	-0.464615	0.0536795	blue	0.767964	-0.355348	-0.109437	-0.276636	-0.211494	-0.366394	-0.395473	0.246454	0.0559953	0.0045513	-0.396012	0.36495	-0.121212	-0.378806	-0.127291	-0.18518	0.181972	0.621341	0.472836	-0.605408	-0.0346571	0.00353388	0.256992	0.734937	0.384069	0.509345	0.241434	0.203211	0.440002	0.862773	0.9888	0.202541	0.243436	0.707471	0.224635	0.693415	0.564488	0.57137
851170	YLR449W	FPR4	Peptidyl-prolyl cis-trans isomerase (PPIase); nuclear proline isomerase; affects expression of multiple genes via its role in nucleosome assembly; catalyzes isomerization of proline residues in histones H3 and H4, which affects lysine methylation of those histones; PPIase domain acts as a transcriptional repressor when tethered to DNA by lexA, and repressor activity is dependent on PPIase activit…	0.512076	0.981296	0.650698	-0.339373	0.436448	-0.578055	0.0583987	blue	0.70183	-0.560969	-0.442582	-0.634273	-0.566844	-0.642104	-0.660102	0.153119	-0.245899	-0.41259	-0.692515	-0.0115739	-0.491702	-0.712242	-0.54299	-0.522015	-0.17797	0.24676	0.0364961	-0.808803	0.278805	0.0109557	0.0577554	0.149645	0.0267476	0.0546274	0.0243689	0.0194883	0.634718	0.441067	0.18256	0.0125556	0.971522	0.10446	0.00935243	0.0681003	0.0817035	0.580004
851172	YLR451W	LEU3	Zinc-knuckle transcription factor, repressor and activator; regulates genes involved in branched chain amino acid biosynthesis and ammonia assimilation; acts as a repressor in leucine-replete conditions and as an activator in the presence of alpha-isopropylmalate, an intermediate in leucine biosynthesis that accumulates during leucine starvation	0.459597	0.932286	0.526017	-0.291131	0.676241	-0.299747	0.13867	blue	0.603695	-0.716793	-0.526882	-0.665426	-0.594233	-0.762305	-0.799393	-0.140241	-0.423435	-0.544312	-0.735881	-0.20732	-0.61441	-0.761928	-0.647298	-0.66585	-0.353208	0.0475516	-0.0806933	-0.614943	0.509219	0.0376583	0.00870951	0.0783954	0.0181927	0.0415957	0.00394535	0.00180707	0.663768	0.170181	0.0672988	0.00636607	0.51793	0.0335287	0.00397403	0.0228784	0.0180922	0.260071
851177	YLR455W	PDP3	Component of the NuA3b histone acetyltransferase complex; regulates interaction between NuA3b and H3K36me3 at the transcribed regions of genes; contains PWWP domain; deletion confers sensitivity to 4-(N-(S-glutathionylacetyl)amino) phenylarsenoxide (GSAO); protein abundance increases in response to DNA replication stress; relocalizes to the cytosol in response to hypoxia	0.576958	0.889275	0.793077	0.00125957	0.398124	-0.511904	-0.00233769	blue	0.577602	-0.446445	-0.36107	-0.54216	-0.491323	-0.507709	-0.549821	0.314682	-0.191563	-0.3078	-0.569653	-0.00689567	-0.371263	-0.599445	-0.464323	-0.450736	-0.0231048	0.238584	0.0782428	-0.758359	0.213506	0.0492099	0.145703	0.248862	0.0686067	0.104768	0.091975	0.0640304	0.319144	0.550892	0.330412	0.0531745	0.983031	0.234758	0.0393926	0.128336	0.141405	0.943181
851189	YLR467W	YRF1-5	Helicase encoded by the Y' element of subtelomeric regions; highly expressed in the mutants lacking the telomerase component TLC1; potentially phosphorylated by Cdc28p	0.381788	0.91695	0.703277	-0.331665	0.49821	-0.46138	0.346976	blue	0.733164	-0.522348	-0.299909	-0.480121	-0.409612	-0.540834	-0.577495	0.0736222	-0.162011	-0.32651	-0.555677	-0.0129517	-0.38292	-0.580927	-0.423793	-0.420674	-0.0705225	0.271289	0.1178	-0.661393	0.260901	0.00666666	0.0814741	0.343592	0.114164	0.186056	0.0694207	0.0492617	0.820123	0.614929	0.300281	0.0606781	0.968134	0.219227	0.0476152	0.169781	0.173281	0.827594
851192	YAL039C	CYC3	Cytochrome c heme lyase (holocytochrome c synthase); attaches heme to apo-cytochrome c (Cyc1p or Cyc7p) in mitochondrial intermembrane space; human homolog HCCS implicated in microphthalmia with linear skin defects (MLS), and can complement yeast null mutant	0.0947238	0.914342	0.419577	-0.571	0.569204	-0.410993	0.132978	blue	0.837127	-0.399762	-0.135777	-0.331568	-0.225061	-0.428009	-0.446372	0.189977	0.0174096	-0.122207	-0.451124	0.234363	-0.199486	-0.425135	-0.228152	-0.26886	0.0847441	0.528057	0.374317	-0.588281	0.0984536	0.000682047	0.19791	0.673939	0.292411	0.481881	0.165123	0.145778	0.554257	0.957173	0.705166	0.14102	0.463452	0.53421	0.16829	0.47572	0.398115	0.793434
851195	YAL036C	RBG1	Member of the DRG family of GTP-binding proteins; associates with translating ribosomes; interacts with Tma46p, Ygr250cp, Gir2p and Yap1p via two-hybrid	0.58399	0.949824	0.587469	-0.241709	0.529923	-0.44576	-0.0235976	blue	0.57612	-0.715025	-0.616074	-0.769072	-0.70743	-0.786187	-0.811212	-0.014954	-0.46679	-0.59615	-0.819826	-0.206938	-0.684522	-0.838806	-0.705153	-0.695375	-0.412066	0.0491096	-0.155833	-0.738395	0.489483	0.049933	0.00895516	0.0329178	0.00345735	0.0100699	0.00242686	0.00136255	0.96321	0.126052	0.0407754	0.00109556	0.518719	0.0140609	0.000649542	0.0104234	0.0120472	0.183173
851196	YAL035W	FUN12	Translation initiation factor eIF5B; GTPase that promotes Met-tRNAiMet binding to ribosomes and ribosomal subunit joining; promotes GTP-dependent maturation of 18S rRNA by Nob1p; protein abundance increases in response to DNA replication stress; homolog of bacterial IF2	0.31424	0.910735	0.55844	-0.283652	0.751041	-0.198797	0.300287	blue	0.627169	-0.682564	-0.401466	-0.53113	-0.457006	-0.682522	-0.719197	-0.143232	-0.329651	-0.406617	-0.62886	-0.10613	-0.483144	-0.657761	-0.510583	-0.569258	-0.215249	0.163318	0.0791885	-0.471727	0.433165	0.0290468	0.0144491	0.195827	0.0755831	0.135272	0.0144575	0.0083835	0.656981	0.29538	0.189612	0.0284872	0.742705	0.111576	0.0200785	0.0898448	0.0533772	0.501676
851208	YAL025C	MAK16	Essential nuclear protein; constituent of 66S pre-ribosomal particles; required for maturation of 25S and 5.8S rRNAs; required for maintenance of M1 satellite double-stranded RNA of the L-A virus	0.520336	0.966567	0.579095	-0.397839	0.283644	-0.718191	-0.0489867	blue	0.717054	-0.434813	-0.376868	-0.564406	-0.515239	-0.549426	-0.588729	0.267425	-0.145935	-0.313728	-0.612725	0.107934	-0.402489	-0.639726	-0.463245	-0.422266	-0.0797534	0.327153	0.119976	-0.898607	0.156621	0.00867361	0.157776	0.22721	0.0559111	0.0864658	0.064261	0.0440161	0.400736	0.650867	0.320693	0.0341555	0.738464	0.194583	0.0250744	0.129344	0.17149	0.805387
851209	YAL024C	LTE1	Protein similar to GDP/GTP exchange factors; without detectable GEF activity; required for asymmetric localization of Bfa1p at daughter-directed spindle pole bodies and for mitotic exit at low temperatures	0.641954	0.705447	0.842892	0.320588	0.408175	-0.302016	0.00259578	blue	0.286587	-0.492572	-0.432166	-0.555425	-0.524782	-0.509627	-0.566273	0.175771	-0.376959	-0.360977	-0.551711	-0.179021	-0.43605	-0.588552	-0.50954	-0.52463	-0.126339	0.0116722	-0.0791565	-0.583616	0.320438	0.366473	0.103754	0.160609	0.0608202	0.0798114	0.0905497	0.0549263	0.584769	0.227089	0.248993	0.062935	0.577731	0.156462	0.0440953	0.0906143	0.0799142	0.695611
851214	YAL019W	FUN30	Snf2p family member with ATP-dependent chromatin remodeling activity; has a role in silencing at the mating type locus, telomeres and centromeres; enriched at centromeres and is required for correct chromatin structure around centromeres, as well as at the boundary element of the silent HMR; recruited to DNA double-strand breaks (DSBs) where it promotes 5' strand resection of DSBs; potential Cdc2…	0.305787	0.976392	0.539465	-0.456144	0.564521	-0.461342	0.171572	blue	0.75153	-0.55273	-0.331503	-0.491142	-0.430169	-0.590746	-0.629419	0.0620582	-0.165103	-0.289817	-0.588423	0.0867403	-0.38388	-0.610008	-0.411686	-0.434666	-0.0800608	0.354218	0.203668	-0.670624	0.239524	0.00482803	0.0623494	0.292511	0.104916	0.162768	0.0431181	0.0283038	0.84806	0.608102	0.360852	0.0441533	0.788664	0.217975	0.035184	0.183617	0.157932	0.80465
851215	YAL018C	LDS1	Protein Involved in spore wall assembly; localizes to lipid droplets found on or outside of the prospore membrane; shares similarity with Lds2p and Rrt8p, and a strain mutant for all 3 genes exhibits reduced dityrosine fluorescence relative to the single mutants	0.412213	0.958981	0.537499	-0.453395	0.318496	-0.679707	-0.0317342	blue	0.818734	-0.39474	-0.290117	-0.498742	-0.429947	-0.481944	-0.516504	0.336061	-0.0660283	-0.292761	-0.565342	0.123626	-0.354934	-0.569565	-0.398576	-0.353964	-0.0443943	0.40614	0.169285	-0.838025	0.158213	0.00112697	0.204127	0.360333	0.0988376	0.163008	0.112599	0.0855626	0.285518	0.838449	0.355772	0.0554157	0.701878	0.257586	0.0532197	0.199367	0.25898	0.891035
851230	YAL067C	SEO1	Putative permease; member of the allantoate transporter subfamily of the major facilitator superfamily; mutation confers resistance to ethionine sulfoxide	0.622754	0.818989	0.452832	-0.176772	0.162951	-0.684644	-0.400909	blue	0.477792	-0.377683	-0.482943	-0.620151	-0.603436	-0.536551	-0.579097	0.311798	-0.207174	-0.343591	-0.620938	0.0302643	-0.432564	-0.643531	-0.513608	-0.454671	-0.148775	0.176907	-0.0287964	-0.913069	0.160089	0.116186	0.226125	0.111747	0.031455	0.0377625	0.0720966	0.048488	0.32384	0.51823	0.274176	0.0311781	0.925612	0.16018	0.0239525	0.0876396	0.137536	0.644466
851237	YAL062W	GDH3	NADP(+)-dependent glutamate dehydrogenase; synthesizes glutamate from ammonia and alpha-ketoglutarate; rate of alpha-ketoglutarate utilization differs from Gdh1p; expression regulated by nitrogen and carbon sources; GDH3 has a paralog, GDH1, that arose from the whole genome duplication	-0.0406935	0.843257	0.363182	-0.62124	0.500463	-0.409762	0.0149733	blue	0.744825	-0.386326	-0.161544	-0.331252	-0.240571	-0.404383	-0.376779	0.204499	0.0751963	-0.0116628	-0.462245	0.355158	-0.136985	-0.404716	-0.127281	-0.19007	0.123341	0.6311	0.417137	-0.555385	-0.0578437	0.00544791	0.214808	0.615962	0.292899	0.45134	0.192292	0.227329	0.523768	0.816335	0.971304	0.130282	0.257264	0.671181	0.191891	0.693438	0.554061	0.702539
851246	YAL053W	FLC2	Putative calcium channel involved in calcium release under hypotonic stress; required for uptake of FAD into endoplasmic reticulum; involved in cell wall maintenance; FLC2 has a paralog, YOR365C, that arose from the whole genome duplication	0.232019	0.939034	0.616631	-0.392039	0.574288	-0.426179	0.105231	blue	0.793273	-0.472657	-0.233457	-0.449443	-0.340059	-0.48212	-0.496543	0.237192	-0.0878203	-0.224281	-0.548089	0.117054	-0.302716	-0.512638	-0.326484	-0.355759	0.0144753	0.449934	0.249302	-0.65509	0.171734	0.00207696	0.120725	0.465232	0.142692	0.279464	0.112448	0.100571	0.457913	0.786087	0.48344	0.0650458	0.717134	0.338872	0.0883427	0.300323	0.256402	0.964387
851260	YAL003W	EFB1	Translation elongation factor 1 beta; stimulates nucleotide exchange to regenerate EF-1 alpha-GTP for the next elongation cycle; part of the EF-1 complex, which facilitates binding of aminoacyl-tRNA to the ribosomal A site; human homolog EEF1B2 can complement yeast efb1 mutants	0.811079	0.755065	0.732688	0.184648	0.512491	-0.231191	0.121529	blue	0.390551	-0.706405	-0.642538	-0.812713	-0.698329	-0.771689	-0.803611	-0.0629486	-0.647802	-0.797697	-0.807907	-0.559006	-0.797105	-0.827786	-0.865967	-0.834374	-0.567634	-0.303235	-0.442269	-0.570168	0.742443	0.209403	0.010228	0.0242419	0.00131274	0.0115382	0.00328145	0.0016373	0.845903	0.0227373	0.00187899	0.00147726	0.0588283	0.00190463	0.000886528	0.000270862	0.000738055	0.0542162
851307	YDL219W	DTD1	D-Tyr-tRNA(Tyr) deacylase; functions in protein translation, may affect nonsense suppression via alteration of the protein synthesis machinery; ubiquitous among eukaryotes	-0.731447	-0.876474	-0.54076	0.126006	-0.372704	0.520363	0.152133	blue	-0.491536	0.649597	0.670293	0.798368	0.776703	0.763587	0.804817	-0.0245998	0.471157	0.673242	0.804307	0.307492	0.72212	0.851442	0.773826	0.704633	0.46884	0.0954521	0.30579	0.815058	-0.520591	0.104594	0.0222403	0.0170647	0.00185027	0.00296354	0.0038491	0.00159108	0.93951	0.122072	0.0164067	0.0016105	0.330921	0.00799957	0.000441634	0.00314293	0.0105054	0.124173
851311	YDL215C	GDH2	NAD(+)-dependent glutamate dehydrogenase; degrades glutamate to ammonia and alpha-ketoglutarate; expression sensitive to nitrogen catabolite repression and intracellular ammonia levels; genetically interacts with GDH3 by suppressing stress-induced apoptosis	0.28879	0.949004	0.542534	-0.418143	0.64056	-0.357023	0.194277	blue	0.817318	-0.568097	-0.317751	-0.520385	-0.410828	-0.590081	-0.603744	0.0907943	-0.180014	-0.402439	-0.618491	-0.0523719	-0.436526	-0.606688	-0.4669	-0.472821	-0.160864	0.292952	0.100368	-0.599933	0.361492	0.00116871	0.0539762	0.314189	0.0828321	0.184624	0.0434124	0.0376387	0.778999	0.575588	0.194643	0.0320447	0.871586	0.155959	0.0364702	0.12595	0.120578	0.617467
851313	YDL213C	NOP6	rRNA-binding protein required for 40S ribosomal subunit biogenesis; contains an RNA recognition motif (RRM); hydrophilin essential to overcome the stress of the desiccation-rehydration process; NOP6 may be a fungal-specific gene as no homologs have been yet identified in higher eukaryotes	0.478536	0.972363	0.592485	-0.41723	0.310355	-0.696294	-0.00812948	blue	0.770051	-0.420189	-0.334145	-0.542747	-0.468811	-0.527608	-0.556832	0.303531	-0.108034	-0.296579	-0.601682	0.123374	-0.374507	-0.613248	-0.43688	-0.401481	-0.0507855	0.374019	0.15579	-0.869152	0.149946	0.00339074	0.173829	0.288446	0.0682479	0.1242	0.0779099	0.0600317	0.337508	0.738228	0.349238	0.0384727	0.702463	0.230372	0.03396	0.155585	0.195808	0.875449
851317	YDL210W	UGA4	GABA (gamma-aminobutyrate) permease; serves as a GABA transport protein involved in the utilization of GABA as a nitrogen source; catalyzes the transport of putrescine and delta-aminolevulinic acid (ALA); localized to the vacuolar membrane	0.338234	0.92133	0.578574	-0.384562	0.566738	-0.391629	0.223587	blue	0.824784	-0.547798	-0.328071	-0.540757	-0.433924	-0.57748	-0.576997	0.124695	-0.161575	-0.452816	-0.625338	-0.107822	-0.455789	-0.617972	-0.494876	-0.468308	-0.19075	0.249332	0.0231882	-0.614569	0.376322	0.000961377	0.0652176	0.297839	0.0694681	0.158723	0.0492692	0.0495043	0.699408	0.615894	0.139351	0.0296618	0.738727	0.136449	0.0322309	0.101899	0.124659	0.552617
851318	YDL209C	CWC2	Member of the NineTeen Complex (NTC); this complex contains Prp19p and stabilizes U6 snRNA in catalytic forms of the spliceosome containing U2, U5, and U6 snRNAs; binds directly to U6 snRNA; similar to S. pombe Cwf2	0.411488	0.987932	0.611122	-0.34899	0.464213	-0.564077	0.0108427	blue	0.727378	-0.504541	-0.355136	-0.531121	-0.479471	-0.563291	-0.603335	0.22107	-0.159695	-0.287064	-0.6056	0.106934	-0.385361	-0.625219	-0.426803	-0.428731	-0.0551482	0.372027	0.184516	-0.774617	0.195729	0.00734227	0.0943616	0.257296	0.0755895	0.114727	0.0565047	0.037803	0.489889	0.62006	0.365639	0.0368988	0.740814	0.216055	0.0297021	0.166447	0.164333	0.864832
851319	YDL208W	NHP2	Protein related to mammalian high mobility group (HMG) proteins; nuclear protein; essential for function of H/ACA-type snoRNPs, which are involved in 18S rRNA processing	0.541239	0.967771	0.596908	-0.368485	0.293116	-0.705315	-0.0573839	blue	0.722324	-0.44602	-0.389901	-0.587873	-0.523599	-0.561152	-0.597678	0.28526	-0.168073	-0.342568	-0.635766	0.0784715	-0.426471	-0.653604	-0.487416	-0.446886	-0.104258	0.314973	0.0975986	-0.892437	0.189137	0.00797327	0.146134	0.21023	0.0444011	0.0806164	0.0576561	0.0401297	0.368793	0.601571	0.275701	0.0262819	0.808463	0.166813	0.0211591	0.107985	0.145258	0.747111
851322	YDL205C	HEM3	Porphobilinogen deaminase; catalyzes the conversion of 4-porphobilinogen to hydroxymethylbilane, the third step in heme biosynthesis; localizes to the cytoplasm and nucleus; expression is regulated by Hap2p-Hap3p, but not by levels of heme; human homolog HMBS can complement yeast mutant and allow growth of haploid null after sporulation of a heterozygous diploid	0.130436	0.906167	0.422717	-0.54431	0.457056	-0.507073	0.0745588	blue	0.736149	-0.350806	-0.135024	-0.288555	-0.232652	-0.396906	-0.437837	0.20476	0.0360069	-0.000659453	-0.397973	0.370296	-0.130917	-0.406537	-0.163142	-0.21694	0.175522	0.576704	0.467652	-0.640703	-0.0337136	0.00633696	0.263554	0.67566	0.363044	0.466816	0.201431	0.154578	0.523225	0.911542	0.998377	0.20011	0.236075	0.685071	0.189707	0.612428	0.498239	0.58531
851326	YDL201W	TRM8	Noncatalytic subunit of a tRNA methyltransferase complex; Trm8p and Trm82p comprise an enzyme that catalyzes a methyl-transfer from S-adenosyl-l-methionine to the N(7) atom of guanine at position 46 in tRNA; Trm8 lacks catalytic activity if not bound to Trm82p	0.478213	0.9885	0.590243	-0.41729	0.399043	-0.626517	0.0415497	blue	0.765115	-0.491295	-0.375273	-0.579456	-0.495355	-0.590342	-0.619125	0.213901	-0.172416	-0.353419	-0.645135	0.0604017	-0.430448	-0.656076	-0.489415	-0.466865	-0.113453	0.320987	0.117114	-0.831083	0.228736	0.00373675	0.104791	0.229344	0.048316	0.101516	0.0432968	0.0318185	0.504422	0.592069	0.259767	0.0234908	0.852076	0.162464	0.0205116	0.106331	0.125983	0.725535
851346	YDL182W	LYS20	Homocitrate synthase isozyme and functions in DNA repair; catalyzes the condensation of acetyl-CoA and alpha-ketoglutarate to form homocitrate, which is the first step in the lysine biosynthesis pathway; LYS20 has a paralog, LYS21, that arose from the whole genome duplication	0.183688	0.920516	0.490306	-0.494018	0.466354	-0.504764	0.0268055	blue	0.678914	-0.459042	-0.269773	-0.417796	-0.359905	-0.496444	-0.51847	0.166919	-0.0742574	-0.0875291	-0.526424	0.301616	-0.24565	-0.518181	-0.2483	-0.3086	0.060829	0.530413	0.365844	-0.662451	0.0240402	0.0151939	0.133318	0.396453	0.17655	0.250505	0.10065	0.0841719	0.604106	0.818594	0.786782	0.0787024	0.340718	0.441544	0.0843755	0.436474	0.32909	0.85104
851354	YDL243C	AAD4	Putative aryl-alcohol dehydrogenase; involved in oxidative stress response; similar to P. chrysosporium aryl-alcohol dehydrogenase; expression induced in cells treated with the mycotoxin patulin; members of the AAD gene family comprise three pairs (AAD3 + AAD15, AAD6/AAD16 + AAD4, AAD10 + AAD14) whose two genes are more related to one another than to other members of the family	-0.245289	0.474693	0.0630715	-0.422268	0.415267	-0.119236	-0.196962	blue	0.16181	-0.35603	-0.214481	-0.188883	-0.202077	-0.331283	-0.318754	-0.1001	-0.0475124	0.230578	-0.306502	0.46277	-0.0216845	-0.265859	0.0614256	-0.104612	0.130645	0.509486	0.448528	-0.227536	-0.219204	0.615373	0.256014	0.50324	0.556583	0.528802	0.292851	0.312579	0.756922	0.883426	0.470911	0.33256	0.129789	0.946669	0.403604	0.849593	0.746276	0.685697
851366	YDL232W	OST4	Subunit of the oligosaccharyltransferase complex of the ER lumen; complex catalyzes protein asparagine-linked glycosylation; type I membrane protein required for incorporation of Ost3p or Ost6p into the OST complex	0.423723	0.656763	0.677236	0.113266	0.17971	-0.472452	-0.15093	blue	0.367675	-0.215855	-0.204581	-0.343111	-0.304222	-0.279206	-0.304749	0.463357	-0.0342944	-0.00696592	-0.364798	0.233312	-0.114854	-0.373571	-0.200229	-0.227302	0.193039	0.385155	0.263395	-0.602182	-0.0706444	0.239668	0.500441	0.523598	0.27489	0.336353	0.379482	0.335474	0.129239	0.915736	0.982858	0.243647	0.465518	0.722264	0.231632	0.532657	0.477411	0.547769
851369	YDL229W	SSB1	Cytoplasmic ATPase that is a ribosome-associated molecular chaperone; functions with J-protein partner Zuo1p; may be involved in folding of newly-made polypeptide chains; member of the HSP70 family; interacts with phosphatase subunit Reg1p; SSB1 has a paralog, SSB2, that arose from the whole genome duplication	0.794939	0.863518	0.622119	-0.0887077	0.343627	-0.519739	0.0371244	blue	0.495658	-0.593027	-0.582498	-0.739651	-0.680547	-0.724717	-0.774391	0.0223026	-0.47192	-0.633762	-0.74011	-0.288138	-0.671413	-0.802373	-0.761492	-0.704584	-0.406114	-0.113086	-0.248175	-0.780123	0.511124	0.101275	0.0421179	0.046874	0.00596586	0.0148572	0.00766973	0.00310708	0.945151	0.121386	0.0269084	0.00591848	0.363769	0.0168126	0.0016858	0.00400733	0.0105132	0.190213
851387	YDL167C	NRP1	Putative RNA binding protein of unknown function; localizes to stress granules induced by glucose deprivation; predicted to be involved in ribosome biogenesis	0.506108	0.973256	0.532213	-0.411101	0.359739	-0.649727	-0.0132413	blue	0.703202	-0.496537	-0.407045	-0.573082	-0.534593	-0.597297	-0.648011	0.164043	-0.20953	-0.363453	-0.628334	0.0553393	-0.452994	-0.668597	-0.501172	-0.470094	-0.145837	0.27056	0.09094	-0.844105	0.237609	0.0107335	0.100576	0.189101	0.0514377	0.0733426	0.0402903	0.022679	0.610439	0.513377	0.24552	0.0286604	0.864368	0.139176	0.0174517	0.096945	0.123033	0.65109
851388	YDL166C	FAP7	Essential NTPase required for small ribosome subunit synthesis; mediates processing of the 20S pre-rRNA at site D in the cytoplasm but associates only transiently with 43S preribosomes via Rps14p; complex with Rps14 is conserved between humans, yeast, and arches; may be the endonuclease for site D; depletion leads to accumulation of pre-40S ribosomes in 80S-like ribosomes; human TAF9 functionally…	0.496194	0.979144	0.677611	-0.266142	0.452547	-0.557497	0.0212919	blue	0.746425	-0.498155	-0.37069	-0.583297	-0.493076	-0.574102	-0.600722	0.278429	-0.180386	-0.363257	-0.644339	0.0167482	-0.426309	-0.647884	-0.493689	-0.477596	-0.0953372	0.31343	0.103151	-0.789832	0.258973	0.00529489	0.099298	0.235538	0.0465005	0.103346	0.0509289	0.0388657	0.380866	0.574786	0.245794	0.0237191	0.958799	0.166991	0.0227145	0.102852	0.116357	0.768201
851399	YDL156W	CMR1	Nuclear protein with a role in protein quality control; localizes to the intranuclear quality control compartment (INQ) in response to proteasome inhibition or DNA replication stress; INQ likely sequesters proteins involved in DNA metabolism for degradation or re-folding; DNA-binding protein with preference for UV-damaged DNA; contains three WD domains (WD-40 repeat); human ortholog WDR76 also ex…	0.373999	0.588132	0.701998	0.0276759	0.564171	-0.0424997	0.559906	blue	0.293172	-0.600383	-0.355669	-0.447192	-0.371411	-0.553192	-0.59018	-0.294392	-0.430663	-0.376921	-0.4959	-0.263195	-0.445601	-0.525441	-0.459449	-0.526849	-0.230735	-0.0872434	-0.0862636	-0.271114	0.422631	0.355065	0.0390051	0.256531	0.144949	0.234557	0.0620855	0.0433687	0.352972	0.162231	0.22714	0.101083	0.408508	0.146559	0.0793653	0.13293	0.0784174	0.4706
851403	YDL153C	SAS10	Subunit of U3-containing Small Subunit (SSU) processome complex; involved in production of 18S rRNA and assembly of small ribosomal subunit; disrupts silencing when overproduced; mutant has increased aneuploidy tolerance; essential gene	0.402722	0.982745	0.523553	-0.478583	0.39379	-0.632079	0.00810311	blue	0.74694	-0.471187	-0.346581	-0.526193	-0.464454	-0.563353	-0.599767	0.197242	-0.137254	-0.271065	-0.602264	0.152138	-0.375884	-0.619188	-0.41935	-0.413537	-0.0614098	0.385334	0.199642	-0.814859	0.157519	0.00524633	0.122045	0.269744	0.078858	0.128215	0.0564718	0.0392593	0.538913	0.670568	0.394106	0.0382361	0.636915	0.228526	0.031796	0.17478	0.181458	0.849632
851404	YDL150W	RPC53	RNA polymerase III subunit C53	0.42446	0.984489	0.565378	-0.465681	0.383124	-0.642302	0.0606755	blue	0.778657	-0.45798	-0.327697	-0.523998	-0.452099	-0.550193	-0.583442	0.219719	-0.121313	-0.289936	-0.596351	0.125775	-0.374988	-0.612944	-0.428266	-0.410218	-0.0564427	0.374823	0.181938	-0.822019	0.170043	0.00284624	0.134336	0.298423	0.0803447	0.140056	0.063814	0.0464328	0.492613	0.707237	0.360646	0.0406901	0.696912	0.229726	0.0340734	0.164841	0.185341	0.861686
851407	YDL148C	NOP14	Nucleolar protein; forms a complex with Noc4p that mediates maturation and nuclear export of 40S ribosomal subunits; also present in the small subunit processome complex, which is required for processing of pre-18S rRNA	0.440779	0.981682	0.535642	-0.445204	0.365388	-0.658105	-0.00295786	blue	0.740007	-0.45871	-0.352483	-0.52452	-0.480162	-0.554762	-0.601021	0.211129	-0.130605	-0.283164	-0.590903	0.134488	-0.378747	-0.621622	-0.430117	-0.40938	-0.0591195	0.361201	0.177813	-0.84053	0.1621	0.0059291	0.133636	0.26112	0.0799891	0.114129	0.0611937	0.038743	0.510093	0.685787	0.372476	0.0430487	0.676887	0.224713	0.0309387	0.162824	0.18633	0.855187
851430	YDL127W	PCL2	Cyclin, interacts with cyclin-dependent kinase Pho85p; member of the Pcl1,2-like subfamily, involved in the regulation of polarized growth and morphogenesis and progression through the cell cycle; localizes to sites of polarized cell growth; PCL2 has a paralog, PCL9, that arose from the whole genome duplication	0.50555	0.840456	0.81952	-0.0650552	0.565098	-0.296423	0.258114	blue	0.673647	-0.613993	-0.411758	-0.648526	-0.516577	-0.603048	-0.595851	0.130257	-0.353033	-0.59048	-0.697063	-0.32312	-0.582593	-0.670574	-0.610941	-0.583858	-0.311026	0.0588971	-0.181015	-0.574398	0.513383	0.0163179	0.0336831	0.183534	0.0225359	0.0855111	0.0379188	0.0409028	0.686588	0.260325	0.0432356	0.0117543	0.305623	0.0468296	0.0170011	0.0348284	0.0462396	0.325104
851435	YDL122W	UBP1	Ubiquitin-specific protease; removes ubiquitin from ubiquitinated proteins; cleaves at the C terminus of ubiquitin fusions irrespective of their size; capable of cleaving polyubiquitin chains	0.342766	0.985234	0.52381	-0.452302	0.564954	-0.471474	0.101571	blue	0.772094	-0.544813	-0.342502	-0.52594	-0.441647	-0.60051	-0.634725	0.105106	-0.184988	-0.33271	-0.616857	0.053863	-0.413859	-0.623559	-0.451807	-0.465734	-0.112634	0.33334	0.167931	-0.703342	0.273781	0.00325481	0.0669972	0.275799	0.0790281	0.150608	0.0389528	0.026606	0.745114	0.564898	0.29065	0.0326331	0.867958	0.181084	0.0302682	0.140345	0.127027	0.727451
851446	YDL112W	TRM3	2'-O-ribose methyltransferase; catalyzes the ribose methylation of the guanosine nucleotide at position 18 of tRNAs	0.373372	0.918907	0.492876	-0.300448	0.730267	-0.226398	0.156237	blue	0.582339	-0.745361	-0.514835	-0.632272	-0.57439	-0.761064	-0.792541	-0.180306	-0.429704	-0.511445	-0.719539	-0.173703	-0.597944	-0.748416	-0.605321	-0.648368	-0.351736	0.0833669	-0.0359031	-0.521097	0.504476	0.0469489	0.00539632	0.0867555	0.0273815	0.0507862	0.00404021	0.00211123	0.574958	0.163272	0.089213	0.00833797	0.589265	0.0400182	0.00510897	0.0370096	0.0225797	0.262203
851447	YDL111C	RRP42	Exosome non-catalytic core component; involved in 3'-5' RNA processing and degradation in both the nucleus and the cytoplasm; has similarity to E. coli RNase PH and to human hRrp42p (EXOSC7)	0.420798	0.973775	0.541315	-0.398423	0.616735	-0.403538	0.0930544	blue	0.69622	-0.673462	-0.49017	-0.668272	-0.565119	-0.730026	-0.750659	-0.0179952	-0.352805	-0.486991	-0.75258	-0.103517	-0.574502	-0.744498	-0.59463	-0.613216	-0.295988	0.186131	-0.00079272	-0.686928	0.42022	0.0118998	0.0163585	0.105711	0.0175266	0.0555334	0.00702698	0.00490546	0.955734	0.260654	0.108339	0.00473599	0.748855	0.0507306	0.00547967	0.0414251	0.0339721	0.350245
851460	YDL098C	SNU23	Component of the U4/U6.U5 snRNP complex; involved in mRNA splicing via spliceosome	0.569694	0.859239	0.73261	-0.0699922	0.412771	-0.479684	-0.216382	blue	0.491986	-0.598058	-0.575761	-0.773863	-0.681363	-0.662854	-0.641244	0.231445	-0.373677	-0.476171	-0.801902	-0.133421	-0.575802	-0.755051	-0.603365	-0.594602	-0.277565	0.147509	-0.141881	-0.796207	0.304704	0.104229	0.0399706	0.0501089	0.00314059	0.014691	0.0188103	0.0246225	0.469197	0.23149	0.117606	0.00170453	0.679329	0.0500889	0.00452474	0.0377909	0.0414371	0.382408
851477	YDL082W	RPL13A	Ribosomal 60S subunit protein L13A; not essential for viability; homologous to mammalian ribosomal protein L13, no bacterial homolog; RPL13A has a paralog, RPL13B, that arose from the whole genome duplication	0.920789	0.73462	0.693236	0.125721	0.22781	-0.489909	0.00392923	blue	0.366579	-0.521382	-0.577915	-0.75323	-0.66668	-0.66433	-0.713459	0.0852693	-0.537115	-0.677245	-0.71459	-0.398834	-0.689547	-0.762413	-0.798832	-0.726101	-0.441095	-0.247915	-0.369653	-0.755406	0.548142	0.241179	0.0821405	0.0490583	0.00467972	0.017897	0.018454	0.00917717	0.792179	0.07174	0.0155437	0.00901651	0.19905	0.0130999	0.0039372	0.0018306	0.00749806	0.15118
851485	YDL074C	BRE1	E3 ubiquitin ligase; forms heterodimer with Rad6p to regulate K63 polyubiquitination in response to oxidative stress and to monoubiquinate histone H2B-K123, which is required for the subsequent methylation of histone H3-K4 and H3-K79; required for DSBR, transcription, silencing, and checkpoint control; interacts with RNA-binding protein Npl3p, linking histone ubiquitination to mRNA processing; Br…	0.399155	0.91022	0.630352	-0.202273	0.693336	-0.252046	0.298034	blue	0.611615	-0.632636	-0.383063	-0.524205	-0.446966	-0.652184	-0.700694	-0.076549	-0.312314	-0.384845	-0.604649	-0.0989162	-0.455309	-0.641927	-0.513034	-0.561895	-0.162434	0.153016	0.0866139	-0.527985	0.403175	0.0345729	0.0272654	0.21904	0.0802036	0.145177	0.0215379	0.0111422	0.813082	0.322996	0.216722	0.0372767	0.759721	0.136914	0.0244208	0.0880549	0.0572546	0.613993
851491	YDL069C	CBS1	Mitochondrial translational activator of the COB mRNA; membrane protein that interacts with translating ribosomes, acts on the COB mRNA 5'-untranslated leader	-0.00744611	0.780052	0.403923	-0.429097	0.4094	-0.426509	-0.151728	blue	0.700787	-0.208098	-0.0137832	-0.209305	-0.121388	-0.224169	-0.215406	0.455477	0.150848	0.109945	-0.31418	0.442095	-0.000794529	-0.257511	-0.0199132	-0.0791182	0.279782	0.694378	0.514233	-0.549522	-0.158425	0.0111269	0.516324	0.966089	0.513838	0.707063	0.483665	0.501356	0.136752	0.639807	0.733747	0.319958	0.150146	0.998045	0.419073	0.951021	0.806911	0.37846
851495	YDL064W	UBC9	SUMO-conjugating enzyme involved in the Smt3p conjugation pathway; nuclear protein required for S- and M-phase cyclin degradation and mitotic control; involved in proteolysis mediated by the anaphase-promoting complex cyclosome (APCC)	0.346524	0.792661	0.794415	-0.041883	0.531588	-0.284658	0.19034	blue	0.644624	-0.405068	-0.21269	-0.458523	-0.285964	-0.432331	-0.408527	0.323249	-0.0934119	-0.222528	-0.525386	0.0113861	-0.255129	-0.468242	-0.348944	-0.388633	0.0553566	0.341271	0.167452	-0.530299	0.182789	0.0236371	0.191468	0.506895	0.133815	0.367561	0.160432	0.187339	0.305418	0.772773	0.486957	0.0794022	0.971984	0.42354	0.12472	0.266272	0.211846	0.864326
851497	YDL063C	SYO1	Transport adaptor or symportin; facilitates synchronized nuclear coimport of the two 5S-rRNA binding proteins Rpl5p and Rpl11p; binds to nascent Rpl5p during translation; required for biogenesis of the large ribosomal subunit; green fluorescent protein (GFP)-fusion protein localizes to the cytoplasm and nucleus	0.569954	0.958537	0.547689	-0.369144	0.285989	-0.703962	-0.0956642	blue	0.669686	-0.481612	-0.448502	-0.618393	-0.577103	-0.602621	-0.650305	0.213846	-0.224671	-0.382224	-0.660127	0.0424117	-0.476526	-0.691874	-0.528507	-0.484843	-0.166686	0.251639	0.0460042	-0.900239	0.227121	0.0172025	0.112883	0.143633	0.0320799	0.0494527	0.0380912	0.0220464	0.504534	0.482661	0.220136	0.0194818	0.895877	0.117294	0.0126717	0.0773113	0.110138	0.604618
851499	YDL060W	TSR1	Protein required for processing of 20S pre-rRNA in the cytoplasm; associates with pre-40S ribosomal particles; inhibits the premature association of 60S subunits with assembling 40S subunits in the cytoplasm; similar to Bms1p; relocalizes from nucleus to cytoplasm upon DNA replication stress	0.531994	0.975578	0.562246	-0.365111	0.393498	-0.617159	0.012024	blue	0.670865	-0.544645	-0.451	-0.604459	-0.569579	-0.637073	-0.693859	0.112937	-0.260312	-0.396622	-0.658962	0.0096421	-0.492881	-0.702927	-0.536715	-0.513118	-0.182651	0.227439	0.0559819	-0.830147	0.282344	0.0169357	0.0670984	0.141143	0.0373525	0.0532123	0.0258787	0.0123147	0.726741	0.413849	0.201783	0.0197741	0.976274	0.103504	0.0107778	0.0719925	0.0879947	0.56991
851509	YDL051W	LHP1	RNA binding protein required for maturation of tRNA and U6 snRNA; acts as a molecular chaperone for RNAs transcribed by polymerase III; homologous to human La (SS-B) autoantigen	0.654114	0.890414	0.558481	-0.291539	0.197792	-0.711583	-0.167807	blue	0.556141	-0.506258	-0.546739	-0.710082	-0.671294	-0.644287	-0.668251	0.18901	-0.309089	-0.463303	-0.728128	-0.0446172	-0.55822	-0.752583	-0.604404	-0.543735	-0.275745	0.13867	-0.10091	-0.914594	0.259645	0.060418	0.0930629	0.0658454	0.0096696	0.0168393	0.023734	0.0175315	0.556314	0.328285	0.12929	0.00725197	0.890491	0.0592613	0.00473575	0.0373744	0.0676476	0.385664
851518	YDL043C	PRP11	Subunit of the SF3a splicing factor complex; required for spliceosome assembly	0.215887	0.947643	0.431742	-0.49515	0.650418	-0.35123	0.0853402	blue	0.708262	-0.59305	-0.356414	-0.511954	-0.422722	-0.627921	-0.645928	0.00644998	-0.214174	-0.287094	-0.625417	0.0934647	-0.401938	-0.6149	-0.410699	-0.469743	-0.13015	0.3609	0.211591	-0.586989	0.262281	0.00994297	0.0421077	0.255465	0.0888411	0.170979	0.0287969	0.023265	0.984128	0.503864	0.365588	0.0296352	0.772647	0.195251	0.0333478	0.184775	0.123352	0.686834
851520	YDL042C	SIR2	Conserved NAD+ dependent histone deacetylase of the Sirtuin family; deacetylation targets are primarily nuclear proteins; required for telomere hypercluster formation in quiescent yeast cells; involved in regulation of lifespan; plays roles in silencing at HML, HMR, telomeres, and rDNA; negatively regulates initiation of DNA replication; functions as regulator of autophagy like mammalian homolog …	0.571048	0.953389	0.632209	-0.234189	0.427946	-0.55238	0.018292	blue	0.59988	-0.547937	-0.462336	-0.617127	-0.583584	-0.645911	-0.682312	0.116304	-0.268409	-0.392645	-0.657822	-0.0159901	-0.475514	-0.711792	-0.555585	-0.538581	-0.160243	0.179981	0.0304826	-0.797507	0.27446	0.0392123	0.0651358	0.130196	0.0325352	0.0463669	0.0232698	0.0144996	0.718883	0.398938	0.206755	0.0200631	0.960663	0.118185	0.00941786	0.0607299	0.0708198	0.618845
851522	YDL039C	PRM7	Pheromone-regulated protein; predicted to have one transmembrane segment; promoter contains Gcn4p binding elements; in W303 strain one continuous open reading frame comprising of YDL037C, the intergenic region and YDL039C encodes the IMI1	0.346107	0.945283	0.464597	-0.563045	0.29428	-0.705486	-0.0564875	blue	0.786981	-0.380758	-0.288603	-0.482254	-0.414995	-0.482098	-0.510793	0.281754	-0.039142	-0.216014	-0.556398	0.210125	-0.312579	-0.550649	-0.347992	-0.320789	-0.00737967	0.451857	0.225393	-0.860599	0.0686504	0.00238556	0.222059	0.36296	0.112334	0.179769	0.112468	0.0896909	0.374964	0.903871	0.500118	0.0602744	0.512153	0.322565	0.0635488	0.267668	0.309325	0.98184
851524	YDL037C	BSC1	Protein of unconfirmed function; similar to cell surface flocculin Flo11p; ORF exhibits genomic organization compatible with a translational readthrough-dependent mode of expression; in W303 strain one continuous open reading frame comprising of YDL037C, the intergenic region and YDL039C encodes the gene IMI1	0.316319	0.938111	0.424455	-0.574002	0.311045	-0.684484	-0.0709917	blue	0.738035	-0.408768	-0.317104	-0.476887	-0.435807	-0.503356	-0.539125	0.215562	-0.0546216	-0.19363	-0.555399	0.231011	-0.312317	-0.561355	-0.335558	-0.321292	-0.0122663	0.448153	0.238905	-0.840234	0.055584	0.00613502	0.187053	0.31523	0.116977	0.15672	0.095265	0.07048	0.501038	0.866113	0.546521	0.0608347	0.470054	0.322991	0.0575465	0.286286	0.308524	0.969819
851525	YDL036C	PUS9	Mitochondrial tRNA:pseudouridine synthase; catalyzes the formation of pseudouridine at position 32 in mitochondrial tRNAs; contains an N-terminal mitochondrial targeting sequence; PUS9 has a paralog, RIB2, that arose from the whole genome duplication	0.424381	0.97383	0.494538	-0.494632	0.3796	-0.637954	0.0240397	blue	0.741494	-0.46821	-0.351005	-0.52575	-0.470125	-0.569363	-0.611186	0.162545	-0.149994	-0.297737	-0.595612	0.123845	-0.392053	-0.623442	-0.441307	-0.424695	-0.087286	0.340404	0.168398	-0.820395	0.181327	0.00577729	0.124748	0.263264	0.0791566	0.123005	0.0533234	0.0347352	0.613748	0.641725	0.347269	0.0410046	0.701372	0.207502	0.0303085	0.150961	0.168778	0.787362
851529	YDL033C	SLM3	tRNA-specific 2-thiouridylase; responsible for 2-thiolation of the wobble base of mitochondrial tRNAs; human homolog TRMU is implicated in myoclonus epilepsy associated with ragged red fibers (MERRF), and can complement yeast null mutant	0.371537	0.899651	0.649778	-0.221007	0.710471	-0.233514	0.249064	blue	0.60199	-0.730468	-0.485495	-0.622721	-0.571446	-0.709082	-0.72496	-0.12542	-0.376203	-0.510902	-0.700404	-0.215739	-0.57145	-0.721897	-0.576861	-0.598071	-0.304803	0.0867965	-0.0771574	-0.535492	0.472652	0.0383474	0.00697543	0.10959	0.030557	0.0522616	0.00981914	0.0076393	0.697731	0.228098	0.089611	0.0111902	0.500678	0.0522594	0.00802837	0.0495705	0.0399651	0.335384
851530	YDL031W	DBP10	Putative ATP-dependent RNA helicase of the DEAD-box protein family; constituent of 66S pre-ribosomal particles; essential protein involved in ribosome biogenesis	0.41904	0.993234	0.55579	-0.431939	0.457064	-0.579749	0.0390175	blue	0.744605	-0.531972	-0.386059	-0.559756	-0.50182	-0.603023	-0.644681	0.151289	-0.192403	-0.337797	-0.636733	0.0718652	-0.43425	-0.656186	-0.467487	-0.461611	-0.120623	0.33154	0.141751	-0.788069	0.239498	0.00546924	0.0750346	0.215153	0.058417	0.0964442	0.0379288	0.0236208	0.638817	0.549114	0.28288	0.025983	0.824356	0.158375	0.0204833	0.125411	0.130879	0.708837
851531	YDL030W	PRP9	Subunit of the SF3a splicing factor complex; required for spliceosome assembly; acts after the formation of the U1 snRNP-pre-mRNA complex	0.579935	0.832572	0.511693	-0.0789569	0.696439	-0.166298	-0.0831714	blue	0.331892	-0.868526	-0.774956	-0.877915	-0.79663	-0.921721	-0.933199	-0.268062	-0.69886	-0.710706	-0.922175	-0.398754	-0.822333	-0.916228	-0.824771	-0.868778	-0.606581	-0.177605	-0.331435	-0.567275	0.659967	0.291911	0.000247075	0.00307154	0.000173411	0.00192537	2.03e-05	9.36e-06	0.39957	0.0114484	0.0095771	1.97e-05	0.199148	0.00102601	2.82e-05	0.00096172	0.000244827	0.0365122
851545	YDL017W	CDC7	DDK (Dbf4-dependent kinase) catalytic subunit; required for origin firing and replication fork progression in mitotic S phase through phosphorylation of Mcm2-7p complexes and Cdc45p; kinase activity correlates with cyclical DBF4 expression; required for pre-meiotic DNA replication, meiotic DSB formation, recruitment of monopolin complex to kinetochores during meiosis I, regulation of meiosis-spec…	0.643944	0.751031	0.806637	0.227278	0.625221	-0.14552	0.0012069	blue	0.311524	-0.709502	-0.609	-0.780322	-0.662931	-0.730512	-0.72877	-0.0114262	-0.591589	-0.610119	-0.792504	-0.39964	-0.673297	-0.766972	-0.725114	-0.758414	-0.407999	-0.141839	-0.294398	-0.547222	0.55751	0.324288	0.00975607	0.0355711	0.0027491	0.0187917	0.00697029	0.00717519	0.971886	0.0427461	0.0351414	0.00211297	0.198058	0.0163946	0.00360354	0.00762021	0.00424863	0.187966
851548	YDL014W	NOP1	Histone glutamine methyltransferase, modifies H2A at Q105 in nucleolus; component of the small subunit processome complex, which is required for processing of pre-18S rRNA; ortholog of mammalian fibrillarin; inviability of the null mutant is functionally complemented by human FBL	0.713671	0.93332	0.659104	-0.191564	0.296848	-0.651066	-0.0134208	blue	0.623409	-0.515421	-0.499087	-0.680079	-0.627302	-0.642968	-0.689574	0.189855	-0.304984	-0.504357	-0.696216	-0.122392	-0.555008	-0.74316	-0.641394	-0.576855	-0.245901	0.0938572	-0.0966903	-0.881281	0.350204	0.0303199	0.0863358	0.0985676	0.0149531	0.0290027	0.0241163	0.0130948	0.554517	0.335082	0.0945015	0.0119006	0.704736	0.0610548	0.00561073	0.0245779	0.0495732	0.441062
851549	YDL013W	SLX5	Subunit of the Slx5-Slx8 SUMO-targeted Ub ligase (STUbL) complex; role in Ub-mediated degradation of histone variant Cse4p preventing mislocalization to euchromatin; role in proteolysis of spindle positioning protein Kar9p, and DNA repair proteins Rad52p and Rad57p; forms SUMO-dependent nuclear foci, including DNA repair centers; contains a RING domain and two SIM motifs; associates with the cent…	0.412083	0.975513	0.64167	-0.276626	0.654657	-0.367074	0.076241	blue	0.667557	-0.655496	-0.456032	-0.638881	-0.535597	-0.690557	-0.712347	0.0570397	-0.32762	-0.415976	-0.722622	-0.0610078	-0.514903	-0.709226	-0.544686	-0.584756	-0.205402	0.240033	0.0638229	-0.668186	0.368752	0.0176923	0.0206622	0.136213	0.0253286	0.0727018	0.0129127	0.00933716	0.860236	0.298544	0.178637	0.00793506	0.850606	0.0867066	0.00979745	0.0670737	0.0458239	0.521896
851554	YDL008W	APC11	Catalytic core subunit, Anaphase-Promoting Complex/Cyclosome (APC/C); which is a ubiquitin-protein ligase required for degradation of anaphase inhibitors, including mitotic cyclins, during the metaphase/anaphase transition; contains a RING-H2 domain that is required for activity	-0.265784	-0.855644	-0.629589	0.458209	-0.220611	0.674718	-0.220655	blue	-0.883394	0.141877	-0.0525401	0.21067	0.0858515	0.195784	0.242947	-0.499309	-0.150421	0.00684256	0.288588	-0.330634	0.0580976	0.271472	0.119888	0.105448	-0.275314	-0.602437	-0.446831	0.727373	0.0657096	0.000139164	0.660052	0.871177	0.511034	0.790787	0.541978	0.446745	0.0983933	0.640767	0.983162	0.362986	0.293855	0.857667	0.393368	0.710544	0.744308	0.386439
851569	YDR006C	SOK1	Protein of unknown function; overexpression suppresses the growth defect of mutants lacking protein kinase A activity; involved in cAMP-mediated signaling; localized to the nucleus; similar to the mouse testis-specific protein PBS13	0.399716	0.986722	0.591226	-0.387263	0.558004	-0.478905	0.0917224	blue	0.772065	-0.566529	-0.37988	-0.576566	-0.486251	-0.617113	-0.64762	0.131487	-0.21699	-0.395531	-0.657195	-0.0188622	-0.46292	-0.655977	-0.500519	-0.499065	-0.155063	0.288563	0.0925025	-0.732296	0.319663	0.00325676	0.0547921	0.223216	0.0497144	0.108957	0.0325405	0.0227881	0.683763	0.498136	0.203139	0.0202233	0.953603	0.129648	0.0205372	0.0974509	0.0985847	0.630371
851570	YDR007W	TRP1	Phosphoribosylanthranilate isomerase; catalyzes the third step in tryptophan biosynthesis; in 2004, the sequence of TRP1 from strain S228C was updated by changing the previously annotated internal STOP (TAA) to serine (TCA); enhances vegetative growth at low and high temperatures when used as an auxotrophic marker in strains such as W303	0.387764	0.981021	0.546592	-0.399583	0.520543	-0.512311	-0.0457087	blue	0.738109	-0.568321	-0.427955	-0.612553	-0.534918	-0.630548	-0.649141	0.164213	-0.210015	-0.3823	-0.691598	0.0155284	-0.469135	-0.679165	-0.496023	-0.493096	-0.166379	0.316617	0.0835316	-0.769494	0.276921	0.00612722	0.0538599	0.165182	0.0342198	0.0731351	0.0279363	0.0223657	0.610065	0.51238	0.220036	0.0127219	0.961798	0.123905	0.0151417	0.100984	0.10333	0.605292
851574	YDR011W	SNQ2	Plasma membrane ATP-binding cassette (ABC) transporter; multidrug transporter involved in multidrug resistance and resistance to singlet oxygen species	-0.0213464	0.711369	0.218476	-0.502048	0.430364	-0.343091	-0.179015	blue	0.388946	-0.418685	-0.281849	-0.332916	-0.311554	-0.446079	-0.456432	0.013349	-0.0916867	0.0839677	-0.44606	0.417325	-0.150117	-0.416535	-0.105956	-0.229711	0.0800906	0.526138	0.419616	-0.490151	-0.11619	0.211447	0.175537	0.374797	0.290333	0.324238	0.146074	0.135827	0.967157	0.776875	0.795291	0.146093	0.177089	0.641449	0.177994	0.743114	0.472627	0.804578
851576	YDR013W	PSF1	Subunit of the GINS complex (Sld5p, Psf1p, Psf2p, Psf3p); complex is localized to DNA replication origins and implicated in assembly of the DNA replication machinery	0.497416	0.845838	0.79957	-0.172227	0.269288	-0.605437	-0.00219893	blue	0.715465	-0.354848	-0.26923	-0.547586	-0.402307	-0.412744	-0.409415	0.473654	-0.128277	-0.310096	-0.585898	0.0179317	-0.357721	-0.526241	-0.407287	-0.372251	-0.0324646	0.346318	0.0679235	-0.800389	0.158455	0.00889357	0.257709	0.39744	0.0653432	0.194804	0.182381	0.186289	0.119834	0.691142	0.326628	0.0452989	0.95589	0.253601	0.0788259	0.188813	0.233418	0.920219
851579	YDR016C	DAD1	Essential subunit of the Dam1 complex (aka DASH complex); complex couples kinetochores to the force produced by MT depolymerization thereby aiding in chromosome segregation; is transferred to the kinetochore prior to mitosis	-0.554339	-0.915076	-0.561099	0.257947	-0.623415	0.324118	-0.0835202	blue	-0.539861	0.784654	0.653176	0.80417	0.699901	0.852126	0.868367	0.164845	0.543223	0.64531	0.865325	0.290667	0.735243	0.861683	0.752156	0.77014	0.486669	0.0297386	0.20715	0.654993	-0.573082	0.0700228	0.00250813	0.0212728	0.00161576	0.0112738	0.00043207	0.000248504	0.60867	0.0679584	0.0234409	0.000277091	0.359382	0.00643568	0.000314622	0.00477306	0.00338471	0.108607
851580	YDR017C	KCS1	Inositol hexakisphosphate and inositol heptakisphosphate kinase; generation of high energy inositol pyrophosphates by Kcs1p is required for many processes such as vacuolar biogenesis, stress response, RNA polymerase I-mediated rRNA transcription and telomere maintenance; inositol hexakisphosphate is also known as IP6; inositol heptakisphosphate is also known as IP7	0.525388	0.900332	0.642044	-0.104183	0.587102	-0.334489	0.183446	blue	0.519678	-0.619569	-0.454565	-0.566791	-0.539134	-0.669104	-0.727368	-0.0483807	-0.342979	-0.410635	-0.617816	-0.112241	-0.485884	-0.691129	-0.562249	-0.584692	-0.187618	0.0836425	0.0202984	-0.60512	0.3887	0.0833256	0.0316609	0.137639	0.0546551	0.0704746	0.0173353	0.00734348	0.881309	0.275087	0.184851	0.0322869	0.728369	0.109264	0.0128077	0.0570638	0.0458534	0.559279
851583	YDR020C	DAS2	Putative protein of unknown function; non-essential gene identified in a screen for mutants with increased levels of rDNA transcription; weak similarity with uridine kinases and with phosphoribokinases	0.535436	0.967095	0.538329	-0.38552	0.374324	-0.629672	0.0186108	blue	0.68005	-0.526836	-0.441752	-0.595117	-0.563354	-0.627749	-0.684679	0.107921	-0.241927	-0.403159	-0.645619	0.00130485	-0.487122	-0.694349	-0.538503	-0.503415	-0.183207	0.212309	0.0428261	-0.839669	0.281059	0.0149591	0.0784261	0.1505	0.0412162	0.0564713	0.0288539	0.0140301	0.738494	0.448715	0.19377	0.0233528	0.996789	0.108229	0.0122277	0.0708683	0.09522	0.568717
851584	YDR021W	FAL1	Nucleolar protein required for maturation of 18S rRNA; member of the eIF4A subfamily of DEAD-box ATP-dependent RNA helicases; 18S rRNA biogenesis defect of the null mutant is functionally complemented by human EIF4A3	0.514266	0.976094	0.598671	-0.374332	0.316261	-0.69516	-0.0356487	blue	0.743312	-0.44214	-0.36528	-0.558366	-0.505232	-0.543358	-0.58738	0.284374	-0.145178	-0.327952	-0.609934	0.0862268	-0.407154	-0.634315	-0.465092	-0.42387	-0.0801666	0.33123	0.119933	-0.881673	0.18532	0.00559574	0.150099	0.242978	0.0591804	0.093837	0.0678767	0.0446242	0.370348	0.652577	0.298025	0.0352123	0.789891	0.188971	0.0267345	0.127621	0.169696	0.804396
851590	YDR026C	NSI1	RNA polymerase I termination factor; binds to rDNA terminator element, required for efficient Pol I termination; required for rDNA silencing at NTS1; facilities association of Sir2p with NTS1, contributes to rDNA stability and cell longevity; interacts physically with Fob1p and RENT subunits, Sir2p and Net1p; may interact with ribosomes, based on co-purification experiments; Myb-like DNA-binding …	0.388597	0.949559	0.602046	-0.259298	0.725667	-0.266535	0.105465	blue	0.640065	-0.719199	-0.487232	-0.654806	-0.564387	-0.726466	-0.743282	-0.0372686	-0.401825	-0.501075	-0.740228	-0.158145	-0.583038	-0.735924	-0.591864	-0.630915	-0.307002	0.151247	-0.0197711	-0.579441	0.472567	0.0249729	0.00838332	0.108137	0.0208425	0.0559211	0.00745332	0.0055987	0.908454	0.195389	0.0970197	0.00590642	0.623504	0.0466213	0.0063613	0.0426256	0.0278173	0.331732
851595	YDR031W	MIX14	Mitochondrial intermembrane space protein of unknown function; required for normal oxygen consumption; contains twin cysteine-x9-cysteine motifs; protein abundance increases in response to DNA replication stress	-0.766213	-0.807468	-0.622064	0.0833169	-0.186734	0.635822	0.248839	blue	-0.392659	0.569055	0.668615	0.813109	0.782242	0.695849	0.717515	-0.134982	0.455377	0.581245	0.799576	0.218285	0.672922	0.815878	0.710546	0.642031	0.406723	0.0437315	0.295371	0.899463	-0.365023	0.206738	0.0534818	0.0174477	0.00129984	0.00264019	0.0119644	0.00861062	0.675757	0.136848	0.0474643	0.00179945	0.495511	0.0164773	0.00121237	0.00960081	0.0243904	0.189486
851598	YDR034C	LYS14	Transcriptional activator involved in regulating lysine biosynthesis; involved in the regulation of genes of the lysine biosynthesis pathway; requires 2-aminoadipate semialdehyde as co-inducer	0.438355	0.973614	0.572351	-0.313973	0.639841	-0.376984	0.101151	blue	0.653243	-0.667432	-0.477073	-0.633154	-0.5631	-0.714977	-0.74837	-0.0240714	-0.345903	-0.457524	-0.709819	-0.0936252	-0.543415	-0.731426	-0.57981	-0.601958	-0.252468	0.169837	0.0218461	-0.667059	0.407024	0.0212549	0.0177214	0.116815	0.0271009	0.0566069	0.00896202	0.00511315	0.940807	0.270745	0.134773	0.00970869	0.772266	0.0678419	0.00686443	0.0481467	0.0383603	0.428557
851609	YDR039C	ENA2	P-type ATPase sodium pump; involved in Na+ efflux to allow salt tolerance; likely not involved in Li+ efflux	0.121422	0.373696	-0.0551661	-0.201112	0.324931	-0.0556951	0.118127	blue	0.157591	-0.322954	-0.170166	-0.0896555	-0.16465	-0.303666	-0.447936	-0.30975	-0.286397	-0.14777	-0.143925	-0.00267579	-0.245818	-0.251856	-0.196909	-0.254618	-0.167447	-0.0137374	0.129054	-0.090671	0.296767	0.624736	0.305886	0.596985	0.781711	0.6091	0.337281	0.1442	0.327196	0.366804	0.646729	0.655412	0.993415	0.441221	0.429715	0.539613	0.4245	0.602944
851613	YDR043C	NRG1	Transcriptional repressor; recruits the Cyc8p-Tup1p complex to promoters; mediates glucose repression and negatively regulates a variety of processes including filamentous growth and alkaline pH response; activated in stochastic pulses of nuclear localization in response to low glucose	0.355291	0.95341	0.706418	-0.349052	0.460747	-0.539537	0.0854672	blue	0.787343	-0.448158	-0.272847	-0.514748	-0.391179	-0.49669	-0.497662	0.319238	-0.0903737	-0.247484	-0.594888	0.116801	-0.324583	-0.558117	-0.373269	-0.3807	0.0111346	0.438887	0.206937	-0.755282	0.141254	0.00236692	0.143978	0.390881	0.0868183	0.208607	0.100455	0.0996862	0.311803	0.78	0.438031	0.0413143	0.717725	0.303311	0.0593184	0.23204	0.222135	0.972603
851614	YDR044W	HEM13	Coproporphyrinogen III oxidase; oxygen-requiring enzyme that catalyzes sixth step in heme biosynthetic pathway; transcription is repressed by oxygen and heme (via Rox1p and Hap1p); human homolog CPOX can complement yeast mutant and allow growth of haploid null after sporulation of a heterozygous diploid	-0.228198	-0.945412	-0.428145	0.527725	-0.626649	0.378739	-0.116155	blue	-0.754164	0.58836	0.347814	0.512281	0.417648	0.614599	0.646949	-0.00609884	0.221541	0.333305	0.624037	-0.0424662	0.433032	0.607791	0.426706	0.466621	0.164994	-0.336406	-0.170704	0.608624	-0.307845	0.00459974	0.044182	0.267929	0.0886021	0.176719	0.0334589	0.0229765	0.984992	0.48894	0.289734	0.0301046	0.895744	0.159678	0.036039	0.166554	0.126207	0.608342
851618	YDR049W	VMS1	Component of a Cdc48p-complex involved in protein quality control; exhibits cytosolic and ER-membrane localization, with Cdc48p, during normal growth, and contributes to ER-associated degradation (ERAD) of specific substrates at a step after their ubiquitination; forms a mitochondrially-associated complex with Cdc48p and Npl4p under oxidative stress that is required for ubiquitin-mediated mitocho…	0.492731	0.972396	0.629094	-0.218362	0.633568	-0.377478	0.0103272	blue	0.593956	-0.70941	-0.552006	-0.703484	-0.640866	-0.751022	-0.779017	0.00137139	-0.408105	-0.497653	-0.770531	-0.133668	-0.598481	-0.784078	-0.624018	-0.647036	-0.299706	0.138972	-0.0396843	-0.692369	0.430099	0.0417152	0.00976987	0.062765	0.0106883	0.0247344	0.00487307	0.00282501	0.996625	0.18784	0.0996933	0.0033584	0.678763	0.0397936	0.00253923	0.0301111	0.022952	0.343935
851623	YDR052C	DBF4	Regulatory subunit of Cdc7p-Dbf4p kinase complex; required for Cdc7p kinase activity and initiation of DNA replication; phosphorylates the Mcm2-7 family of proteins; cell cycle regulated; relative distribution to the nucleus increases upon DNA replication stress; co-expression of human CDC7 and DBF4 complements single cdc7 or dbf4 null mutations or the cdc7 dbf4 double null mutation	0.621488	0.823746	0.888434	0.0917999	0.560387	-0.278523	0.278909	blue	0.454874	-0.666937	-0.508023	-0.676552	-0.590585	-0.677143	-0.69912	-0.0167608	-0.458265	-0.530512	-0.70496	-0.297485	-0.585628	-0.725937	-0.642398	-0.655563	-0.284866	-0.0353231	-0.16883	-0.588562	0.473754	0.137338	0.0178368	0.0917406	0.0156907	0.0431893	0.0155651	0.0114046	0.958768	0.134062	0.0759883	0.0104538	0.347696	0.0454227	0.00751826	0.0242826	0.0206449	0.369484
851624	YDR054C	CDC34	Ubiquitin-conjugating enzyme (E2); catalytic subunit of SCF ubiquitin-protein ligase complex (together with Skp1p, Rbx1p, Cdc53p, and an F-box protein) that regulates cell cycle progression by targeting key substrates for degradation; protein abundance increases in response to DNA replication stress; human CDC34 functionally complements the thermosensitivity of the cdc34-2 mutant	0.166319	0.943578	0.450428	-0.547657	0.58288	-0.419792	0.155832	blue	0.766897	-0.495511	-0.250958	-0.414074	-0.335937	-0.532392	-0.552	0.0771338	-0.0734747	-0.179477	-0.52899	0.193338	-0.281837	-0.528422	-0.308003	-0.353797	0.00647971	0.454016	0.310194	-0.613084	0.141039	0.00360889	0.101392	0.431416	0.180834	0.285706	0.0747618	0.0627683	0.811676	0.820478	0.576746	0.0769914	0.547137	0.374818	0.0773675	0.330076	0.259222	0.984055
851626	YDR056C	EMC10	Putative protein of unknown function; subunit of evolutionarily conserved EMC (Endoplasmic Reticulum Membrane Complex) implicated in ERAD (ER-associated degradation) and proper assembly of multi-pass transmembrane (TM) proteins; EMC acts in yeast as an ER-mitochondria tether that interacts with outer membrane protein Tom5p of TOM (Translocase of the Mitochondrial Outer Membrane) complex; YDR056C …	-0.535367	-0.813762	-0.458218	0.304385	-0.164578	0.686387	0.271787	blue	-0.60857	0.427238	0.458611	0.613242	0.608221	0.509335	0.550892	-0.276102	0.226209	0.469396	0.628897	0.0882318	0.521906	0.638769	0.519869	0.419769	0.271107	-0.156293	0.13573	0.870929	-0.272337	0.0357369	0.165969	0.133731	0.0339623	0.0358722	0.0907654	0.0634082	0.385024	0.479588	0.123667	0.0284749	0.785105	0.0817784	0.0253624	0.0831922	0.174305	0.394029
851632	YDR060W	MAK21	Constituent of 66S pre-ribosomal particles; required for large (60S) ribosomal subunit biogenesis; acts as part of a Mak21p-Noc2p-Rrp5p module that associates with nascent pre-rRNA during transcription and has a role in bigenesis of the large ribosomal subunit; involved in nuclear export of pre-ribosomes; required for maintenance of dsRNA virus; homolog of human CAATT-binding protein	0.477787	0.981741	0.538333	-0.424377	0.386126	-0.633658	0.0175017	blue	0.726217	-0.501076	-0.392173	-0.560307	-0.516701	-0.593964	-0.643723	0.161744	-0.192059	-0.350916	-0.622983	0.0649082	-0.43948	-0.659596	-0.485807	-0.460454	-0.129291	0.294435	0.114145	-0.827363	0.234741	0.00748378	0.0970191	0.20735	0.0581156	0.085423	0.0417119	0.023897	0.615519	0.549842	0.263394	0.0304666	0.841159	0.152858	0.0196148	0.109328	0.131975	0.688809
851642	YDR070C	FMP16	Protein of unknown function; may be involved in responding to conditions of stress; the authentic, non-tagged protein is detected in highly purified mitochondria in high-throughput studies; protein abundance increases in response to DNA replication stress	0.450516	0.794421	0.720391	0.076061	0.65082	-0.162755	-0.0745629	blue	0.463599	-0.700982	-0.55984	-0.732646	-0.640966	-0.683022	-0.649711	0.101598	-0.441848	-0.567733	-0.780732	-0.300168	-0.618375	-0.739395	-0.624219	-0.643183	-0.369682	0.0468413	-0.211147	-0.507533	0.493005	0.129012	0.0110947	0.0583708	0.00672514	0.0247048	0.0143577	0.0222089	0.753384	0.150401	0.0541647	0.00272552	0.343156	0.0320862	0.00599245	0.0300424	0.0240536	0.236914
851647	YDR075W	PPH3	Catalytic subunit of protein phosphatase PP4 complex; Pph3p and Psy2p form active complex, Psy4p may provide substrate specificity; regulates recovery from the DNA damage checkpoint, the gene conversion- and single-strand annealing-mediated pathways of meiotic double-strand break repair and efficient Non-Homologous End-Joining (NHEJ) pathway; involved in activation of Gln3p to alleviate nitrogen …	0.395328	0.977641	0.544597	-0.471595	0.358419	-0.666457	0.0220511	blue	0.794774	-0.406562	-0.279892	-0.472507	-0.413457	-0.494429	-0.539266	0.272228	-0.064443	-0.238331	-0.543988	0.171052	-0.321582	-0.562599	-0.375088	-0.351813	0.00390011	0.419541	0.229366	-0.835848	0.12205	0.00200808	0.189678	0.378264	0.120859	0.181552	0.102257	0.0703923	0.391999	0.842285	0.455693	0.0674946	0.595046	0.308064	0.0568756	0.229592	0.262091	0.990402
851651	YDR079W	PET100	Chaperone that facilitates the assembly of cytochrome c oxidase; integral to the mitochondrial inner membrane; interacts with a subcomplex of subunits VII, VIIa, and VIII (Cox7p, Cox9p, and Cox8p) but not with the holoenzyme	0.125781	0.862627	0.572073	-0.291782	0.742372	-0.16716	0.137962	blue	0.665968	-0.577598	-0.283872	-0.46845	-0.334907	-0.549772	-0.534639	0.0936142	-0.190165	-0.237651	-0.588999	0.0596212	-0.335357	-0.53189	-0.337012	-0.430213	-0.0632352	0.398323	0.229333	-0.424581	0.253908	0.0180646	0.049212	0.37123	0.124529	0.287279	0.0640593	0.0733133	0.772292	0.553859	0.457017	0.0438951	0.853969	0.286592	0.0750878	0.284072	0.16272	0.845209
851656	YDR083W	RRP8	Nucleolar S-adenosylmethionine-dependent rRNA methyltransferase; methylates adenine (m1A) of the large subunit (LSU) rRNA at position 645; involved in pre-rRNA cleavage at site A2; mutation is synthetically lethal with a gar1 mutation; deletion disrupts telomere maintenance by influencing the expression of neighboring gene STN1	0.560051	0.956178	0.582101	-0.365016	0.249485	-0.737789	-0.080822	blue	0.701546	-0.423437	-0.390685	-0.577655	-0.532562	-0.54698	-0.588977	0.288581	-0.15441	-0.333063	-0.616753	0.0873805	-0.415673	-0.647174	-0.481959	-0.430023	-0.0942396	0.30131	0.0894653	-0.917629	0.166304	0.0110022	0.170179	0.209233	0.0491843	0.0746513	0.0657018	0.0439047	0.362997	0.63183	0.290107	0.0326707	0.787136	0.178986	0.0229132	0.112586	0.162925	0.770807
851660	YDR087C	RRP1	Essential evolutionarily conserved nucleolar protein; necessary for biogenesis of 60S ribosomal subunits and for processing of pre-rRNAs to mature rRNA; associated with several distinct 66S pre-ribosomal particles	0.549771	0.956073	0.549167	-0.384119	0.295896	-0.69118	-0.0906914	blue	0.686294	-0.490032	-0.446051	-0.625123	-0.580409	-0.602072	-0.637255	0.218496	-0.22475	-0.401976	-0.669078	0.0272184	-0.487576	-0.694911	-0.531667	-0.483325	-0.186369	0.25173	0.0265482	-0.885623	0.238247	0.0137163	0.105824	0.146103	0.0297347	0.047861	0.0383141	0.0258228	0.495085	0.482502	0.195205	0.0173414	0.933083	0.107852	0.0121286	0.0752327	0.111422	0.561946
851663	YDR089W	VTC5	Novel subunit of the vacuolar transporter chaperone complex; vacuolar transmembrane protein that regulates biosynthesis of polyphosphate; deletion reduces and overexpression increases polyP accumulation; SPX domain (Syg1, Pho81, Xpr1)-containing protein involved in phosphate homeostasis; relocalizes from vacuole to cytoplasm upon DNA replication stress	0.0254559	0.868578	0.391438	-0.518161	0.563192	-0.35936	0.172955	blue	0.734316	-0.386497	-0.110477	-0.240807	-0.189746	-0.39377	-0.426678	0.128554	0.0546908	-0.001243	-0.367961	0.330989	-0.111987	-0.378884	-0.133482	-0.204146	0.169053	0.568057	0.473642	-0.491429	0.0134184	0.00653791	0.214588	0.732499	0.450882	0.554748	0.205341	0.166585	0.690506	0.865945	0.996941	0.239274	0.293306	0.728963	0.224532	0.679189	0.524499	0.599422
851665	YDR091C	RLI1	Essential Fe-S protein; required for ribosome biogenesis, translation initiation/termination; facilitates binding of multifactor complex (MFC) of initiation factors to small ribosomal subunit; Dom34-Hbs1 complex and Rli1p work in dissociating inactive ribosomes, thereby facilitating translation restart; forms complex with Lto1p and Yae1p; dependency on ROS-labile FeS clusters, activity in nuclear…	0.589442	0.973484	0.61722	-0.24359	0.484889	-0.513348	0.027111	blue	0.625213	-0.615929	-0.509838	-0.670219	-0.615904	-0.703295	-0.748611	0.0710587	-0.354809	-0.483891	-0.71916	-0.098028	-0.566027	-0.760668	-0.623545	-0.611309	-0.261319	0.133955	-0.0265161	-0.773678	0.389556	0.0297041	0.0329709	0.0903935	0.0170815	0.03298	0.0107186	0.00509099	0.826301	0.257766	0.110942	0.00838849	0.761824	0.0550554	0.00407087	0.030273	0.0346888	0.411981
851678	YDR101C	ARX1	Nuclear export factor for the ribosomal pre-60S subunit; shuttling factor which directly binds FG rich nucleoporins and facilities translocation through the nuclear pore complex; interacts directly with Alb1p; responsible for Tif6p recycling defects in the absence of Rei1; associated with the ribosomal export complex	0.567639	0.969306	0.570436	-0.367124	0.324518	-0.675238	-0.0304188	blue	0.692023	-0.502099	-0.444303	-0.619663	-0.570805	-0.616141	-0.661874	0.188555	-0.230644	-0.403432	-0.665384	0.0146978	-0.486834	-0.699287	-0.542747	-0.500477	-0.176484	0.237933	0.0378603	-0.87715	0.258666	0.0126447	0.0962294	0.147881	0.0316275	0.0525867	0.0328933	0.0190498	0.557283	0.47078	0.19344	0.0182027	0.96384	0.108469	0.0113764	0.0682481	0.0974839	0.583221
851688	YDR110W	FOB1	Nucleolar protein that binds the rDNA replication fork barrier site; required for replication fork blocking, recombinational hotspot activity, condensin recruitment to replication fork barrier (RFB), and rDNA repeat segregation; related to retroviral integrases	0.353336	0.932921	0.463816	-0.544595	0.35967	-0.624963	-0.0627717	blue	0.69042	-0.504662	-0.405974	-0.57806	-0.518537	-0.589005	-0.598033	0.140629	-0.181214	-0.303021	-0.653677	0.128926	-0.425293	-0.645505	-0.429883	-0.421905	-0.144638	0.355994	0.121573	-0.811849	0.149809	0.012938	0.0942693	0.190381	0.048988	0.0841254	0.0438924	0.0399808	0.662885	0.573001	0.33836	0.0211397	0.689649	0.168115	0.0233851	0.163078	0.171895	0.653799
851692	YDR115W	MRX14	Putative mitochondrial ribosomal protein of the large subunit; similar to E. coli L34 ribosomal protein; required for respiratory growth, as are most mitochondrial ribosomal proteins; protein increases in abundance and relocalizes to the plasma membrane upon DNA replication stress	-0.669496	-0.755581	-0.267346	0.259543	-0.14883	0.622534	0.28924	blue	-0.413941	0.455011	0.540635	0.622118	0.642786	0.603424	0.691312	-0.0470384	0.395574	0.518206	0.616345	0.142813	0.593323	0.689026	0.628015	0.550204	0.386368	0.055386	0.188424	0.808255	-0.380445	0.180989	0.137205	0.0695433	0.0307659	0.0241692	0.0377673	0.012774	0.884582	0.203086	0.0843583	0.0328189	0.65793	0.0419895	0.0131972	0.028766	0.0638073	0.214754
851698	YDR120C	TRM1	tRNA methyltransferase; two forms of protein are made by alternative translation starts; localizes to both nucleus and mitochondrion to produce modified base N2,N2-dimethylguanosine in tRNAs in both compartments; nuclear Trm1p is evenly distributed around inner nuclear membrane in WT, but mislocalizes as puncta near ER-nucleus junctions in spindle pole body (SPB) mutants; both Trm1p inner nuclear…	0.615596	0.960335	0.562556	-0.295839	0.389833	-0.593998	-0.00713967	blue	0.621463	-0.575758	-0.517816	-0.668148	-0.624749	-0.692288	-0.743442	0.0802685	-0.323734	-0.472101	-0.709597	-0.0708806	-0.556111	-0.758356	-0.619385	-0.588761	-0.257814	0.133811	-0.0320016	-0.828444	0.351527	0.030994	0.0501103	0.0846329	0.0175554	0.0298617	0.0125966	0.00558294	0.804151	0.304651	0.121223	0.00974192	0.82673	0.0604346	0.00425326	0.031726	0.0440017	0.418506
851699	YDR121W	DPB4	Subunit of DNA pol epsilon and of ISW2 chromatin accessibility complex; involved in both chromosomal DNA replication and inheritance of telomeric silencing; stabilizes the interaction of Pol epsilon with primer-template DNA, positively affecting the processivity of the polymerase and exonuclease activities of Pol epsilon; interacts with extranucleosomal DNA and acts as anchor point for ISW2 compl…	0.659567	0.953986	0.630352	-0.236061	0.439917	-0.540623	0.03217	blue	0.650787	-0.595463	-0.514967	-0.707302	-0.623797	-0.699952	-0.742397	0.0948555	-0.379933	-0.564848	-0.740434	-0.188042	-0.614332	-0.767677	-0.682853	-0.642135	-0.319009	0.0598938	-0.12042	-0.815362	0.449189	0.0219151	0.0410683	0.086661	0.0100895	0.0301866	0.0112653	0.00568664	0.769344	0.223146	0.0556766	0.00588527	0.558374	0.0335573	0.00355393	0.0143913	0.0243599	0.31217
851704	YDR126W	SWF1	Palmitoyltransferase that acts on transmembrane proteins; including the SNAREs Snc1p, Syn8p, Tlg1p and likely all SNAREs; contains an Asp-His-His-Cys-cysteine rich (DHHC-CRD) domain; may have a role in vacuole fusion	0.6031	0.824517	0.499907	-0.0568429	0.518124	-0.323328	-0.229883	blue	0.472381	-0.62071	-0.55592	-0.722727	-0.637805	-0.68995	-0.721387	0.0925096	-0.517624	-0.613357	-0.747868	-0.277691	-0.670736	-0.745014	-0.700445	-0.691851	-0.437922	-0.0363053	-0.21006	-0.639694	0.548449	0.120972	0.031258	0.0605421	0.00792159	0.0256548	0.013025	0.00809458	0.774917	0.0847689	0.0339194	0.00515956	0.382183	0.0169647	0.00542966	0.0111834	0.0126758	0.154489
851722	YDR144C	MKC7	GPI-anchored aspartyl protease; member of the yapsin family of proteases involved in cell wall growth and maintenance; shares functions with Yap3p and Kex2p; MKC7 has a paralog, YPS1, that arose from the whole genome duplication	-0.00904848	-0.701749	-0.115329	0.628309	-0.286415	0.476923	0.283628	blue	-0.701675	0.251976	0.181731	0.346923	0.255546	0.33061	0.300686	-0.315654	-0.110597	0.0976125	0.441992	-0.266082	0.168893	0.361024	0.163648	0.156355	-0.0170709	-0.526881	-0.252744	0.601057	0.0261049	0.010981	0.429488	0.571889	0.26924	0.422755	0.293892	0.342281	0.31757	0.732219	0.762807	0.150252	0.403195	0.599773	0.248927	0.611312	0.62749	0.958006
851730	YDR152W	GIR2	Highly-acidic RWD domain-containing cytoplasmic protein; forms a highly conserved complex with Rbg2p that is responsible for efficient cell growth under amino acid starvation and binds translational activator Gcn1p in dose-dependent manner according to stress level; associates with translating ribosomes; intrinsically unstructured protein whose stability is enhanced upon binding Rbg2p	0.411503	0.987943	0.578507	-0.431848	0.487604	-0.546545	0.0253059	blue	0.726727	-0.55426	-0.407552	-0.604269	-0.512715	-0.631847	-0.646138	0.146166	-0.220892	-0.347368	-0.682998	0.0633581	-0.45024	-0.676174	-0.487201	-0.495765	-0.140364	0.328239	0.123056	-0.782054	0.236842	0.00742137	0.0614781	0.188497	0.0374286	0.0882866	0.0275174	0.0232053	0.650345	0.490247	0.268585	0.0143624	0.844911	0.141897	0.0157713	0.108164	0.101189	0.663488
851731	YDR153C	ENT5	Protein containing an N-terminal epsin-like domain; involved in clathrin recruitment and traffic between the Golgi and endosomes; associates with the clathrin adaptor Gga2p, clathrin adaptor complex AP-1, and clathrin	0.388769	0.936381	0.592267	-0.279055	0.753595	-0.229184	0.154281	blue	0.640158	-0.736551	-0.504946	-0.683825	-0.560455	-0.759725	-0.762631	-0.0876736	-0.41294	-0.526716	-0.771231	-0.197227	-0.599326	-0.750261	-0.622667	-0.667216	-0.332998	0.1167	-0.0513783	-0.565748	0.498627	0.024945	0.00629346	0.0940543	0.0141982	0.0580349	0.00414458	0.00392072	0.786437	0.182153	0.0785064	0.0033117	0.538945	0.039442	0.00494106	0.0305758	0.0177718	0.290208
851734	YDR156W	RPA14	RNA polymerase I subunit A14	0.442662	0.971437	0.589735	-0.379844	0.506736	-0.505638	0.0115019	blue	0.762206	-0.579146	-0.428853	-0.645634	-0.542388	-0.638892	-0.647161	0.171978	-0.265039	-0.469724	-0.717069	-0.069579	-0.529801	-0.698905	-0.554619	-0.535362	-0.240692	0.251441	0.00340706	-0.755773	0.35586	0.00395286	0.0484648	0.164199	0.0233485	0.0684671	0.0253253	0.0229168	0.593025	0.40511	0.123369	0.0086716	0.829871	0.0764559	0.0114407	0.0612747	0.0728514	0.451104
851739	YDR161W	ACL4	Specific assembly chaperone for ribosomal protein Rpl4p; binds to an evolutionarily conserved surface extension of nascent Rpl4p and chaperones Rpl4p until its assembly into the pre-ribosome; transcriptionally co-regulated with rRNA and ribosome biosynthesis genes	0.513951	0.969911	0.539283	-0.410561	0.429014	-0.578018	0.00939058	blue	0.660315	-0.597556	-0.503476	-0.668533	-0.607788	-0.696463	-0.723908	0.0557018	-0.306728	-0.448001	-0.728406	-0.0305046	-0.546385	-0.75015	-0.582557	-0.566049	-0.256778	0.196035	-0.00129728	-0.813254	0.316759	0.019435	0.0401811	0.0951731	0.0174665	0.0360403	0.0118576	0.00777134	0.863487	0.332186	0.144136	0.00721862	0.925023	0.0660561	0.00495105	0.0468466	0.0550438	0.420444
851743	YDR165W	TRM82	Catalytic subunit of a tRNA methyltransferase complex; Trm8p and Trm82p comprise an enzyme that catalyzes a methyl-transfer from S-adenosyl-l-methionine to the N(7) atom of guanine at position 46 in tRNA; Trm8 lacks catalytic activity if not bound to Trm82p; relocalizes to the cytosol in response to hypoxia; mutation in human ortholog WDR4 causes microcephalic primordial dwarfism	0.441428	0.966404	0.483541	-0.420194	0.547448	-0.456262	0.0873157	blue	0.662789	-0.626677	-0.471609	-0.621139	-0.553896	-0.709895	-0.742793	-0.0312022	-0.314373	-0.433673	-0.698042	-0.0358849	-0.526966	-0.727541	-0.567192	-0.578881	-0.251661	0.189727	0.0449753	-0.701546	0.361105	0.0188261	0.0292111	0.121666	0.0311074	0.0616849	0.0096974	0.00564715	0.923313	0.319646	0.158992	0.0115868	0.911841	0.0783387	0.00732257	0.0544462	0.048592	0.430085
851752	YDR172W	SUP35	Translation termination factor eRF3; has a role in mRNA deadenylation and decay; altered protein conformation creates the [PSI(+)] prion that modifies cellular fitness, alters translational fidelity by affecting reading frame selection, and results in a nonsense suppressor phenotype; many stress-response genes are repressed in the presence of [PSI(+)]	0.454059	0.940025	0.554122	-0.281126	0.691002	-0.283262	0.190875	blue	0.603963	-0.74351	-0.533386	-0.66784	-0.595068	-0.777154	-0.814222	-0.157227	-0.442697	-0.545207	-0.746491	-0.203778	-0.624824	-0.775275	-0.646944	-0.676776	-0.362395	0.059737	-0.0664131	-0.580613	0.523446	0.037551	0.00557627	0.0741187	0.0176266	0.0412373	0.00293614	0.00126414	0.625546	0.149526	0.0667601	0.00528859	0.525264	0.029836	0.00305155	0.0229779	0.0156429	0.247001
851761	YDR180W	SCC2	Subunit of cohesin loading factor (Scc2p-Scc4p); a complex required for loading of cohesin complexes onto chromosomes; involved in establishing sister chromatid cohesion during DSB repair via histone H2AX; promotes gene expression program that supports translational fidelity; evolutionarily-conserved adherin; relocalizes to cytosol in response to hypoxia; human disorder Cornelia de Lange syndrome…	0.438134	0.883435	0.673774	-0.224127	0.588868	-0.320184	0.449381	blue	0.686935	-0.574953	-0.32541	-0.483249	-0.418048	-0.590563	-0.639415	-0.0497197	-0.247894	-0.436521	-0.550309	-0.162646	-0.449623	-0.609715	-0.515025	-0.50934	-0.168348	0.108208	0.0201038	-0.541401	0.422872	0.0135932	0.0505074	0.302009	0.111487	0.176262	0.0431989	0.0251677	0.878045	0.437249	0.155965	0.0637463	0.613525	0.142512	0.0352961	0.0866194	0.090762	0.600967
851765	YDR184C	ATC1	Nuclear protein; possibly involved in regulation of cation stress responses and/or in the establishment of bipolar budding pattern; relative distribution to the nucleus decreases upon DNA replication stress	0.491571	0.979108	0.559658	-0.420684	0.3521	-0.668958	-0.0485622	blue	0.728917	-0.484073	-0.399252	-0.587557	-0.527944	-0.583551	-0.623157	0.221971	-0.189927	-0.350668	-0.645309	0.0718159	-0.443538	-0.660467	-0.48686	-0.45682	-0.127762	0.313078	0.100807	-0.87186	0.210954	0.0071578	0.110788	0.198536	0.044544	0.0776858	0.0463821	0.0304066	0.488076	0.554365	0.263755	0.0234412	0.824475	0.148663	0.0193973	0.108448	0.135451	0.692329
851766	YDR185C	UPS3	Mitochondrial protein of unknown function; similar to Ups1p and Ups2p which are involved in regulation of mitochondrial cardiolipin and phosphatidylethanolamine levels; null is viable but interacts synthetically with ups1 and ups2 mutations; UPS3 has a paralog, UPS2, that arose from the whole genome duplication	0.426221	0.986428	0.589683	-0.3863	0.487907	-0.539252	0.0545986	blue	0.794739	-0.517865	-0.363013	-0.570425	-0.475476	-0.589114	-0.616398	0.212022	-0.17174	-0.377269	-0.646582	0.0147924	-0.437723	-0.644263	-0.487574	-0.47266	-0.126404	0.323096	0.109841	-0.766056	0.28315	0.00200968	0.0845987	0.246135	0.0527801	0.118219	0.0438435	0.0327997	0.508262	0.593545	0.226677	0.0230797	0.963607	0.154698	0.0237412	0.107853	0.120723	0.69546
851767	YDR186C	SND1	Protein involved in SRP-independent targeting of substrates to the ER; component of an alternative ER targeting pathway that has partial functional redundancy with the GET pathway; preference for substrates with downstream transmembrane domains; interacts with Env10p/Snd2p and Pho88p/Snd3p; can compensate for loss of SRP; may interact with ribosomes, based on co-purification experiments; GFP-fusi…	0.332415	0.966412	0.653401	-0.320799	0.630156	-0.388112	0.0675624	blue	0.702727	-0.623571	-0.413146	-0.604703	-0.513198	-0.637873	-0.63798	0.114536	-0.248438	-0.36865	-0.694197	-0.00871153	-0.462546	-0.670956	-0.477012	-0.507653	-0.154583	0.314568	0.0941055	-0.667788	0.29271	0.0108101	0.0302642	0.181913	0.0372553	0.0879364	0.0256343	0.0256018	0.723007	0.43621	0.238327	0.0122547	0.978564	0.129999	0.0169151	0.116868	0.0920168	0.631445
851771	YDR190C	RVB1	ATP-dependent DNA helicase, also known as pontin; member of the AAA+ and RuvB-like protein families; similar to Rvb2p; conserved component of multiple complexes including the INO80 complex, the Swr1 complex, and the R2TP complex (Rvb1-Rvb2-Tah1-Pih1); involved in multiple processes such as chromatin remodeling, box C/D snoRNP assembly, and RNA polymerase II assembly	0.213553	0.939044	0.490591	-0.461022	0.675146	-0.31038	0.204728	blue	0.747028	-0.593686	-0.323074	-0.493669	-0.394902	-0.61214	-0.620765	0.00672308	-0.193944	-0.316987	-0.607993	0.0421546	-0.398174	-0.601976	-0.415941	-0.464835	-0.129874	0.339444	0.187235	-0.537379	0.299117	0.00523802	0.0418321	0.305695	0.102868	0.203924	0.0343752	0.0312387	0.983456	0.545857	0.315418	0.0359607	0.896506	0.199862	0.0383531	0.178677	0.12786	0.687467
851779	YDR198C	RKM2	Ribosomal protein lysine methyltransferase; responsible for trimethylation of the lysine residue at position 3 of Rpl12Ap and Rpl12Bp	0.441754	0.830264	0.309446	-0.333476	0.605177	-0.255902	0.012466	blue	0.409361	-0.785114	-0.680035	-0.728812	-0.723832	-0.854186	-0.872786	-0.341327	-0.515496	-0.60402	-0.788974	-0.251151	-0.700529	-0.843597	-0.704232	-0.717734	-0.517825	-0.0909607	-0.216583	-0.550825	0.533851	0.186352	0.00248355	0.0149621	0.00717025	0.00778093	0.00040427	0.000211131	0.277558	0.086282	0.0375278	0.00228429	0.43105	0.0111695	0.000563339	0.010569	0.00858087	0.0846265
851782	YDR201W	SPC19	Essential subunit of the Dam1 complex (aka DASH complex); complex couples kinetochores to the force produced by MT depolymerization thereby aiding in chromosome segregation; also localized to nuclear side of spindle pole body	-0.390747	-0.909706	-0.422437	0.571083	-0.18599	0.758023	-0.0053625	blue	-0.808676	0.299173	0.225762	0.418807	0.356634	0.422345	0.467843	-0.315199	-0.00115212	0.21187	0.48355	-0.216143	0.281079	0.503453	0.33294	0.280712	-0.00786187	-0.4319	-0.234205	0.845625	-0.0698409	0.00144993	0.344836	0.480479	0.175398	0.255151	0.1714	0.125085	0.318307	0.997165	0.508575	0.111231	0.499857	0.376158	0.0951909	0.290296	0.376808	0.980654
851788	YDR207C	UME6	Rpd3L histone deacetylase complex subunit; key transcriptional regulator of early meiotic genes; involved in chromatin remodeling and transcriptional repression via DNA looping; binds URS1 upstream regulatory sequence, represses transcription by recruiting conserved histone deacetylase Rpd3p (through co-repressor Sin3p) and chromatin-remodeling factor Isw2p; couples metabolic responses to nutriti…	0.587674	0.936869	0.670301	-0.142529	0.451894	-0.51171	0.0592644	blue	0.595022	-0.53936	-0.436161	-0.580406	-0.557703	-0.614062	-0.676386	0.122011	-0.271028	-0.40108	-0.616284	-0.0643696	-0.46825	-0.681009	-0.549459	-0.529352	-0.144298	0.148747	0.0227198	-0.76374	0.317462	0.0412569	0.0703341	0.156345	0.0478625	0.0595476	0.0336574	0.015726	0.705619	0.394172	0.196297	0.0328412	0.842462	0.124712	0.014763	0.064242	0.0767515	0.654567
851797	YDR211W	GCD6	Catalytic epsilon subunit of the translation initiation factor eIF2B; eIF2B is the guanine-nucleotide exchange factor for eIF2; activity subsequently regulated by phosphorylated eIF2; first identified as a negative regulator of GCN4 expression; forms cytoplasmic foci upon DNA replication stress	0.190624	0.903286	0.449456	-0.423623	0.770638	-0.184799	0.211651	blue	0.632213	-0.710327	-0.425047	-0.548952	-0.468112	-0.702563	-0.713852	-0.175902	-0.321718	-0.380967	-0.667155	-0.049226	-0.48695	-0.663469	-0.474022	-0.549474	-0.244885	0.23064	0.101302	-0.455275	0.391003	0.0274003	0.00963326	0.168388	0.0645387	0.124838	0.0108366	0.00912103	0.584484	0.307847	0.221785	0.0177858	0.879248	0.108373	0.0186613	0.119507	0.0642328	0.443013
851799	YDR213W	UPC2	Sterol regulatory element binding protein; induces sterol biosynthetic genes, upon sterol depletion; acts as a sterol sensor, binding ergosterol in sterol rich conditions; relocates from intracellular membranes to perinuclear foci upon sterol depletion; redundant activator of filamentation with ECM22, up-regulating the expression of filamentous growth genes; contains a Zn[2]-Cys[6] binuclear clus…	0.603026	0.613995	0.554639	0.0759761	0.354173	-0.298096	-0.248499	blue	0.246274	-0.574601	-0.61963	-0.75427	-0.684874	-0.634991	-0.632965	0.0212607	-0.505651	-0.593115	-0.738577	-0.373893	-0.649995	-0.700917	-0.669743	-0.638203	-0.447356	-0.173225	-0.391707	-0.650588	0.449443	0.440347	0.0506813	0.0316392	0.00459072	0.0139919	0.0265228	0.0271609	0.94771	0.0935202	0.0420797	0.00607791	0.231199	0.0221311	0.0111054	0.0171896	0.0255338	0.144784
851818	YDR232W	HEM1	5-aminolevulinate synthase; catalyzes the first step in the heme biosynthetic pathway; an N-terminal signal sequence is required for localization to the mitochondrial matrix; expression is regulated by Hap2p-Hap3p; has a pyridoxal phosphate cofactor whose insertion is mediated by Mcx1p	0.513398	0.964774	0.666678	-0.3265	0.439884	-0.557594	0.17449	blue	0.813768	-0.48626	-0.332643	-0.561677	-0.45823	-0.562074	-0.595143	0.220793	-0.175879	-0.435335	-0.618905	-0.0709424	-0.45293	-0.631928	-0.52678	-0.481468	-0.140653	0.239379	0.0395459	-0.775372	0.332998	0.0012786	0.108949	0.290754	0.0573724	0.134095	0.0571578	0.0412049	0.490446	0.584535	0.15722	0.0318967	0.826582	0.139239	0.0274916	0.0784637	0.113006	0.662832
851832	YDR245W	MNN10	Subunit of a Golgi mannosyltransferase complex; complex mediates elongation of the polysaccharide mannan backbone; membrane protein of the mannosyltransferase family; other members of the complex are Anp1p, Mnn9p, Mnn11p, and Hoc1p	0.43042	0.741511	0.445585	-0.226583	0.127108	-0.627896	0.0982799	blue	0.589119	-0.0976664	-0.0281939	-0.148475	-0.153569	-0.21192	-0.325785	0.332935	0.0923678	0.00575671	-0.174476	0.286146	-0.0422067	-0.278472	-0.172222	-0.142389	0.258115	0.361398	0.378016	-0.677974	-0.0390811	0.0438412	0.76268	0.93069	0.645141	0.63371	0.508471	0.301419	0.290304	0.775255	0.985834	0.587583	0.367243	0.896378	0.38079	0.592493	0.658891	0.417944
851843	YDR256C	CTA1	Catalase A; breaks down hydrogen peroxide in the peroxisomal matrix formed by acyl-CoA oxidase (Pox1p) during fatty acid beta-oxidation	0.705363	0.914374	0.769053	-0.0434071	0.424526	-0.504904	0.0905163	blue	0.521544	-0.61999	-0.559798	-0.709499	-0.662864	-0.703829	-0.751966	0.0679426	-0.389914	-0.515482	-0.73097	-0.192913	-0.587257	-0.779886	-0.664489	-0.639894	-0.266423	0.0319674	-0.125991	-0.784638	0.405373	0.0820284	0.0315118	0.0583938	0.00975661	0.0188079	0.0106331	0.00478969	0.833822	0.210213	0.0862919	0.00691711	0.548036	0.0446796	0.00277424	0.0184159	0.0250241	0.40257
851844	YDR257C	RKM4	Ribosomal lysine methyltransferase; specific for monomethylation of Rpl42ap and Rpl42bp (lysine 55); nuclear SET-domain containing protein	0.0193209	0.852145	0.369166	-0.541658	0.737197	-0.181239	0.204495	blue	0.671491	-0.580593	-0.269944	-0.414313	-0.305431	-0.571535	-0.564415	-0.0942713	-0.165678	-0.19927	-0.550209	0.122261	-0.314161	-0.513958	-0.301584	-0.399124	-0.0800498	0.392571	0.270788	-0.411709	0.21712	0.016795	0.0477735	0.396141	0.180557	0.334339	0.0522164	0.0559059	0.770731	0.606836	0.534662	0.0638044	0.705039	0.319989	0.0873869	0.340771	0.198693	0.804676
851847	YDR260C	SWM1	Subunit of the anaphase-promoting complex (APC); APC is an E3 ubiquitin ligase that regulates the metaphase-anaphase transition and exit from mitosis; required for activation of the daughter-specific gene expression and spore wall maturation	0.005731	0.760745	0.566501	-0.310651	0.549374	-0.252291	0.31828	blue	0.707928	-0.260334	0.0472507	-0.136118	-0.033587	-0.245323	-0.244883	0.265142	0.159052	0.0925345	-0.248771	0.327785	0.0331665	-0.236498	-0.0367557	-0.114494	0.323079	0.586871	0.513646	-0.377228	-0.0637931	0.00999389	0.413809	0.884064	0.673162	0.917469	0.442171	0.443017	0.404922	0.621488	0.774858	0.435576	0.298287	0.918499	0.459269	0.909709	0.723106	0.305688
851859	YDR266C	HEL2	RING finger ubiquitin ligase (E3); involved in ubiquitination and degradation of excess histones; interacts with Ubc4p and Rad53p; null mutant sensitive to hydroxyurea (HU); green fluorescent protein (GFP)-fusion protein localizes to the cytoplasm; computational analysis suggests a role as a transcription factor	0.270062	0.932466	0.509903	-0.386342	0.718354	-0.265595	0.218038	blue	0.645281	-0.668638	-0.407205	-0.538008	-0.464876	-0.681159	-0.711233	-0.119495	-0.294315	-0.356455	-0.643171	-0.0235729	-0.460166	-0.656782	-0.474768	-0.537407	-0.187008	0.238161	0.127447	-0.534083	0.35674	0.0234492	0.0174423	0.18891	0.0711786	0.127822	0.0147325	0.00949963	0.711457	0.353104	0.255407	0.0240572	0.942032	0.132247	0.0203293	0.118845	0.0715561	0.56058
851868	YDR275W	BSC2	Protein of unknown function; ORF exhibits genomic organization compatible with a translational readthrough-dependent mode of expression; null mutant displays increased translation rate and increased readthrough of premature stop codons; BSC2 has a paralog, IRC23, that arose from the whole genome duplication	0.158149	0.705835	0.653275	-0.0468705	0.526164	-0.203641	-0.0388754	blue	0.516877	-0.424697	-0.231105	-0.413495	-0.300572	-0.384089	-0.354658	0.321177	-0.12232	-0.138397	-0.498868	0.103742	-0.235886	-0.42392	-0.231836	-0.30679	0.0310931	0.426298	0.212498	-0.408257	0.114638	0.085298	0.168776	0.469869	0.181507	0.342474	0.217704	0.257982	0.308707	0.704904	0.667963	0.0987384	0.748326	0.460466	0.169641	0.468425	0.332083	0.92358
851874	YDR280W	RRP45	Exosome non-catalytic core component; involved in 3'-5' RNA processing and degradation in both the nucleus and the cytoplasm; has similarity to E. coli RNase PH and to human hRrp45p (PM/SCL-75, EXOSC9); protein abundance increases in response to DNA replication stress	0.369235	0.9894	0.54704	-0.428487	0.568891	-0.467906	0.0673193	blue	0.749422	-0.578257	-0.389288	-0.579229	-0.478456	-0.637536	-0.66426	0.106861	-0.234248	-0.359711	-0.670589	0.0349219	-0.455406	-0.661676	-0.485405	-0.508464	-0.152893	0.323345	0.140213	-0.71207	0.295568	0.00501684	0.0488929	0.21101	0.0484247	0.115607	0.0257371	0.0184708	0.740984	0.463677	0.250779	0.0169978	0.914199	0.136821	0.0190983	0.109666	0.0914119	0.635224
851882	YDR288W	NSE3	Component of the SMC5-SMC6 complex; this complex plays a key role in the removal of X-shaped DNA structures that arise between sister chromatids during DNA replication and repair; protein abundance increases in response to DNA replication stress	-0.0960735	0.793567	0.275797	-0.697189	0.394387	-0.477716	-0.0601312	blue	0.719931	-0.289508	-0.0788667	-0.238064	-0.162707	-0.301666	-0.301816	0.244084	0.10875	0.0905822	-0.366946	0.458635	-0.0648494	-0.305094	-0.0246312	-0.0908762	0.188958	0.691797	0.500088	-0.576473	-0.153319	0.0082859	0.361388	0.807515	0.456213	0.613388	0.340634	0.340381	0.444552	0.736548	0.779504	0.240673	0.133707	0.841301	0.334899	0.939433	0.778804	0.556425
851893	YDR299W	BFR2	Component of the SSU and 90S preribosomes; involved in pre-18S rRNA processing; binds to U3 snoRNA and Mpp10p; multicopy suppressor of sensitivity to Brefeldin A; expression is induced during lag phase and also by cold shock	0.490675	0.986139	0.595003	-0.394108	0.365008	-0.660267	-0.0175617	blue	0.733315	-0.480667	-0.3862	-0.576175	-0.515309	-0.577283	-0.615418	0.235071	-0.171419	-0.330161	-0.635714	0.0855897	-0.421883	-0.653858	-0.474064	-0.449084	-0.0963056	0.330889	0.124909	-0.862217	0.196291	0.00664963	0.113694	0.21497	0.0499059	0.0864156	0.0493649	0.0331576	0.462063	0.594245	0.294589	0.0262978	0.791413	0.17192	0.0210921	0.11947	0.14305	0.765904
851907	YDR312W	SSF2	Protein required for ribosomal large subunit maturation; functionally redundant with Ssf1p; member of the Brix family; SSF2 has a paralog, SSF1, that arose from the whole genome duplication	0.505208	0.971075	0.546357	-0.379289	0.447013	-0.558829	-0.00534634	blue	0.628026	-0.607779	-0.509308	-0.66017	-0.61323	-0.699834	-0.729787	0.0473749	-0.313704	-0.422543	-0.721513	-0.00737495	-0.534146	-0.751317	-0.568909	-0.564373	-0.239803	0.20647	0.0228686	-0.795226	0.301013	0.0287623	0.0360438	0.0907856	0.0194713	0.0339666	0.011285	0.00705498	0.883761	0.320732	0.171179	0.00807819	0.981852	0.0736292	0.0048469	0.0535566	0.0559282	0.45283
851919	YDR320C-A	DAD4	Essential subunit of the Dam1 complex (aka DASH complex); complex couples kinetochores to the force produced by MT depolymerization thereby aiding in chromosome segregation; is transferred to the kinetochore prior to mitosis	-0.478693	-0.939763	-0.665836	0.221463	-0.70783	0.264739	-0.218076	blue	-0.634672	0.752341	0.537352	0.71932	0.596775	0.780742	0.790271	0.088421	0.449551	0.581976	0.796229	0.254971	0.645051	0.787669	0.674058	0.702973	0.371623	-0.0628918	0.10961	0.588027	-0.543554	0.0266227	0.00475689	0.0715907	0.00836711	0.0405105	0.00272499	0.00222016	0.784654	0.142584	0.0471195	0.00194303	0.423836	0.0235148	0.00235022	0.016228	0.0107703	0.234269
851920	YDR321W	ASP1	Cytosolic L-asparaginase, involved in asparagine catabolism; catalyzes hydrolysis of L-asparagine to aspartic acid and ammonia; important enzyme for the treatment of acute lymphoblastic leukemia; has low glutaminase activity and dependence; synthesized constitutively	0.425225	0.957944	0.537833	-0.404176	0.469936	-0.51594	0.143206	blue	0.727988	-0.547999	-0.39174	-0.550902	-0.50453	-0.619818	-0.648589	0.0789902	-0.193322	-0.388789	-0.624216	0.00333199	-0.449797	-0.668322	-0.499246	-0.48018	-0.165022	0.253397	0.0810775	-0.708429	0.294257	0.00726878	0.0650993	0.207897	0.0634023	0.0943694	0.0315724	0.0225184	0.807218	0.547171	0.211648	0.0300434	0.9918	0.142339	0.0175151	0.0984427	0.114113	0.60828
851924	YDR324C	UTP4	Subunit of U3-containing 90S preribosome and SSU processome complexes; involved in production of 18S rRNA and assembly of small ribosomal subunit; member of t-Utp subcomplex involved with transcription of 35S rRNA transcript; Small Subunit processome is also known as SSU processome	0.515398	0.961518	0.494288	-0.419397	0.320847	-0.676541	-0.0837135	blue	0.674868	-0.481607	-0.42568	-0.584131	-0.552435	-0.598683	-0.646531	0.175754	-0.205782	-0.352579	-0.634224	0.0760327	-0.450279	-0.673869	-0.500827	-0.466469	-0.148499	0.271059	0.0859182	-0.868945	0.210908	0.016052	0.112887	0.167686	0.046113	0.0625189	0.0397093	0.0230942	0.584806	0.521108	0.260981	0.0267632	0.814323	0.141859	0.0162692	0.0972117	0.126347	0.645087
851925	YDR325W	YCG1	Subunit of the condensin complex; required for establishment and maintenance of chromosome condensation, chromosome segregation and chromatin binding by the complex; required for tRNA genes clustering at the nucleolus; required for replication slow zone breakage following Mec1p inactivation; transcription is cell cycle regulated, peaking in mitosis and declining in G1; protein is constitutively d…	0.475587	0.865968	0.611075	0.00218565	0.624816	-0.271701	-0.14421	blue	0.466376	-0.653033	-0.535704	-0.652524	-0.630087	-0.671379	-0.698698	0.077126	-0.380124	-0.464554	-0.698171	-0.165916	-0.544335	-0.719181	-0.578681	-0.597183	-0.263331	0.0963958	-0.0752352	-0.603932	0.412331	0.126433	0.0213108	0.0726336	0.0214467	0.0280858	0.0168202	0.0114757	0.811695	0.222893	0.128121	0.0115649	0.606311	0.0672853	0.00838565	0.0486883	0.0403384	0.408259
851931	YDR331W	GPI8	ER membrane glycoprotein subunit of the GPI transamidase complex; adds glycosylphosphatidylinositol (GPI) anchors to newly synthesized proteins; human PIG-K protein is a functional homolog	0.185359	0.800596	0.516574	-0.321711	0.645205	-0.197575	0.364795	blue	0.577107	-0.480711	-0.181423	-0.324219	-0.203704	-0.490147	-0.538036	-0.0609067	-0.190498	-0.121529	-0.432221	0.131117	-0.238575	-0.433897	-0.279638	-0.392099	0.0348535	0.329392	0.336206	-0.395046	0.19979	0.0494504	0.113656	0.572551	0.303886	0.525418	0.105729	0.0711606	0.850851	0.553151	0.706736	0.160549	0.684613	0.455217	0.158752	0.378715	0.207443	0.914366
851936	YDR336W	MRX8	Protein that associates with mitochondrial ribosome; sumoylated under stress conditions in a genome wide study; YDR336W is not an essential gene	0.541512	0.855071	0.561377	-0.0857206	0.706786	-0.180631	-0.0550513	blue	0.444379	-0.772215	-0.654364	-0.811317	-0.70153	-0.8353	-0.820227	-0.117943	-0.553409	-0.648702	-0.856226	-0.339621	-0.712742	-0.840186	-0.761018	-0.789156	-0.479415	-0.0845337	-0.25451	-0.579699	0.582726	0.147803	0.00324692	0.0209586	0.00135902	0.0110048	0.000718828	0.00108419	0.715066	0.0619617	0.022487	0.000378132	0.280123	0.00928005	0.000623728	0.00404378	0.00227519	0.114775
851939	YDR339C	FCF1	Putative PINc domain nuclease; required for early cleavages of 35S pre-rRNA and maturation of 18S rRNA; component of the SSU (small subunit) processome involved in 40S ribosomal subunit biogenesis; copurifies with Faf1p	0.514949	0.98853	0.640376	-0.324189	0.409064	-0.615633	-0.0309308	blue	0.733718	-0.496195	-0.395735	-0.60497	-0.521208	-0.589843	-0.619039	0.265243	-0.19728	-0.363164	-0.66193	0.0405293	-0.442872	-0.666482	-0.505	-0.484372	-0.113148	0.310572	0.096728	-0.845904	0.237159	0.00660454	0.100847	0.202886	0.0371487	0.0822613	0.0435182	0.0318491	0.404736	0.538834	0.245925	0.0190361	0.900478	0.149346	0.0179435	0.0940133	0.110536	0.72625
851944	YDR343C	HXT6	High-affinity glucose transporter; member of the major facilitator superfamily, nearly identical to Hxt7p, expressed at high basal levels relative to other HXTs, repression of expression by high glucose requires SNF3; HXT6 has a paralog, HXT1, that arose from the whole genome duplication	0.759135	0.61874	0.431428	0.0941133	0.472393	-0.131239	0.0768964	blue	0.30669	-0.63729	-0.610722	-0.746917	-0.635127	-0.74819	-0.774949	-0.202521	-0.65255	-0.829434	-0.72984	-0.612361	-0.787416	-0.766433	-0.877704	-0.831401	-0.652256	-0.445479	-0.514012	-0.451565	0.792259	0.332249	0.0258121	0.0349116	0.00524843	0.0264803	0.00512981	0.00307193	0.527878	0.0214396	0.000847407	0.00704879	0.034292	0.00236315	0.00364183	0.000174856	0.000802452	0.0215185
851946	YDR345C	HXT3	Low affinity glucose transporter of the major facilitator superfamily; expression is induced in low or high glucose conditions; HXT3 has a paralog, HXT5, that arose from the whole genome duplication	-0.0790633	-0.706293	-0.510758	0.221513	-0.46213	0.278987	-0.0177824	blue	-0.600528	0.447979	0.281594	0.394728	0.394927	0.397737	0.360342	-0.208003	-0.0179194	0.221542	0.478556	-0.0388139	0.256706	0.463187	0.237163	0.225553	0.0326706	-0.376667	-0.0905993	0.44263	-0.12101	0.0389453	0.144158	0.375247	0.204141	0.203893	0.200402	0.249888	0.516521	0.95592	0.488938	0.11552	0.904673	0.420579	0.129397	0.457969	0.480897	0.919714
851947	YDR346C	SVF1	Protein with a potential role in cell survival pathways; required for the diauxic growth shift; expression in mammalian cells increases survival under conditions inducing apoptosis; mutant has increased aneuploidy tolerance	0.727232	0.883908	0.692611	0.0129808	0.358906	-0.527284	-0.0830154	blue	0.45574	-0.557991	-0.547443	-0.68057	-0.658202	-0.661418	-0.717584	0.149077	-0.38467	-0.47102	-0.689722	-0.132797	-0.553739	-0.751899	-0.638061	-0.61301	-0.24269	0.0460983	-0.0943115	-0.785286	0.36135	0.136497	0.0593879	0.0654275	0.0148526	0.0199664	0.0191619	0.00860124	0.643788	0.21695	0.122196	0.0130672	0.680758	0.0617741	0.00479558	0.0255771	0.034049	0.44724
851950	YDR349C	YPS7	Putative GPI-anchored aspartic protease; member of the yapsin family of proteases involved in cell wall growth and maintenance; located in the cytoplasm and endoplasmic reticulum	0.229722	0.95235	0.478165	-0.450686	0.615324	-0.39256	0.095132	blue	0.720701	-0.539235	-0.294922	-0.447577	-0.381615	-0.559359	-0.603422	0.0702411	-0.173472	-0.235379	-0.554383	0.131665	-0.348872	-0.561536	-0.359823	-0.411446	-0.0538004	0.393806	0.264765	-0.60948	0.22212	0.00818426	0.0704115	0.352066	0.144562	0.220934	0.0586344	0.0377681	0.828273	0.589768	0.461459	0.0614084	0.683353	0.266377	0.0574484	0.250621	0.183898	0.86811
851953	YDR351W	SBE2	Protein required for bud growth; involved in transport of cell wall components from the Golgi to the cell surface; SBE2 has a paralog, SBE22, that arose from the whole genome duplication	0.154679	0.919885	0.437294	-0.43719	0.710115	-0.271311	0.049882	blue	0.657753	-0.633724	-0.373248	-0.503346	-0.44362	-0.622	-0.64085	-0.0266482	-0.241706	-0.290324	-0.619745	0.0632011	-0.413348	-0.607936	-0.390002	-0.458949	-0.149252	0.347035	0.187449	-0.527051	0.280533	0.0200807	0.0269206	0.232068	0.0952726	0.148579	0.0308071	0.0247392	0.934483	0.449141	0.359975	0.0315985	0.845291	0.181678	0.0359829	0.210101	0.133408	0.643393
851959	YDR357C	CNL1	Subunit of the BLOC-1 complex involved in endosomal maturation; interacts with Msb3p; null mutant is sensitive to drug inducing secretion of vacuolar cargo; green fluorescent protein (GFP)-fusion protein localizes to the cytoplasm	-0.604404	-0.800474	-0.795489	-0.155706	-0.71006	0.104867	-0.212798	blue	-0.454462	0.716888	0.531314	0.710874	0.571367	0.724216	0.749439	0.0520986	0.546368	0.625866	0.74833	0.420204	0.656191	0.736892	0.71565	0.751422	0.387078	0.11234	0.227581	0.47627	-0.638317	0.137739	0.0086964	0.0754629	0.00955231	0.0523016	0.00773252	0.00501529	0.872251	0.066066	0.0294835	0.00511686	0.173813	0.020482	0.00625685	0.00886779	0.00483759	0.21384
851963	YDR361C	BCP1	Essential protein involved in nuclear export of Mss4p; Mss4p is a lipid kinase that generates phosphatidylinositol 4,5-biphosphate and plays a role in actin cytoskeleton organization and vesicular transport	0.480384	0.932137	0.438619	-0.461828	0.292885	-0.670012	-0.0680971	blue	0.686686	-0.486192	-0.429757	-0.575936	-0.554204	-0.591836	-0.638046	0.150405	-0.202549	-0.383211	-0.630794	0.0487749	-0.471194	-0.670682	-0.497735	-0.45086	-0.195943	0.257914	0.0509688	-0.831437	0.23882	0.0136408	0.109006	0.163215	0.0500229	0.0615098	0.042638	0.0255816	0.640803	0.527819	0.218846	0.0278564	0.880348	0.122039	0.0169768	0.099629	0.141282	0.541645
851967	YDR363W-A	SEM1	19S proteasome regulatory particle lid subcomplex component; role in Ub-dependent proteolysis and proteasome stability; involved in TREX-2 mediated mRNA export, and in the prevention of transcription-associated genome instability; ubiquitinated by Nedd4-like E3-ligase, Rsp5p; human ortholog DSS1, a BRCA1 binding protein implicated in cancer, complements the yeast null; drives trinucleotide repeat…	-0.845585	-0.76941	-0.685496	-0.12877	-0.260658	0.492251	0.00618083	blue	-0.452209	0.505326	0.538889	0.692888	0.649237	0.619988	0.677991	-0.157115	0.417428	0.64204	0.667357	0.363217	0.631244	0.732764	0.736431	0.646538	0.370355	0.158654	0.311945	0.738123	-0.521789	0.139949	0.093766	0.0706272	0.0124884	0.0223394	0.0315125	0.0153867	0.625797	0.176971	0.0243877	0.0177388	0.245851	0.0277112	0.00671175	0.00630646	0.0230921	0.235996
851968	YDR364C	CDC40	Pre-mRNA splicing factor; important for catalytic step II of pre-mRNA splicing and plays a role in cell cycle progression, particularly at the G1/S phase transition; required for DNA synthesis during mitosis and meiosis; has WD repeats; thermosensitivity of the cdc40 null mutant is functionally complemented by a chimeric construct containing the N-terminal 156 amino acids of yeast Cdc40p fused to…	0.322768	0.988293	0.580648	-0.410455	0.573908	-0.462814	0.0846214	blue	0.758598	-0.556592	-0.35034	-0.535521	-0.452589	-0.596541	-0.618574	0.142971	-0.175121	-0.305188	-0.630622	0.0798876	-0.399655	-0.627428	-0.428498	-0.453002	-0.0871452	0.376686	0.187735	-0.694872	0.239905	0.00423394	0.060166	0.264232	0.0727504	0.139574	0.0406098	0.0320151	0.657573	0.58618	0.334744	0.0279123	0.805065	0.198041	0.0289606	0.164588	0.139169	0.787698
851969	YDR365C	ESF1	Nucleolar protein involved in pre-rRNA processing; depletion causes severely decreased 18S rRNA levels	0.418961	0.986991	0.5811	-0.398196	0.499273	-0.527348	0.0347161	blue	0.702914	-0.589811	-0.437865	-0.610584	-0.547142	-0.650678	-0.673345	0.110302	-0.25091	-0.376075	-0.689127	0.0330507	-0.480602	-0.700237	-0.503737	-0.509571	-0.175883	0.298243	0.0947757	-0.755152	0.273214	0.0107799	0.0435324	0.154548	0.0349639	0.0656057	0.0219448	0.016384	0.73291	0.431508	0.22827	0.0131782	0.918783	0.11375	0.0112179	0.0949737	0.0905913	0.584527
851983	YDR377W	ATP17	Subunit f of the F0 sector of mitochondrial F1F0 ATP synthase; F1F0 ATP synthase is a large, evolutionarily conserved enzyme complex required for ATP synthesis	-0.479479	-0.913977	-0.697012	0.177728	-0.619104	0.328296	-0.312991	blue	-0.692064	0.571866	0.348438	0.537502	0.430004	0.608657	0.65616	-0.0388275	0.273604	0.436365	0.602001	0.155161	0.462887	0.62579	0.542565	0.551588	0.158683	-0.136603	-0.0328578	0.601728	-0.425237	0.0126372	0.0520492	0.267014	0.0714965	0.162947	0.0357033	0.0204898	0.90464	0.389514	0.15613	0.0383428	0.630153	0.129679	0.0295092	0.0683592	0.0630059	0.622308
851990	YDR382W	RPP2B	Ribosomal protein P2 beta; a component of the ribosomal stalk, which is involved in the interaction between translational elongation factors and the ribosome; free (non-ribosomal) P2 stimulates the phosphorylation of the eIF2 alpha subunit (Sui2p) by Gcn2p; regulates the accumulation of P1 (Rpp1Ap and Rpp1Bp) in the cytoplasm	0.809517	0.604067	0.462298	0.134238	0.337208	-0.234713	0.0800065	blue	0.270753	-0.575346	-0.609255	-0.720332	-0.63117	-0.714387	-0.753604	-0.142294	-0.580607	-0.744226	-0.696164	-0.523945	-0.721876	-0.751817	-0.829701	-0.777628	-0.566797	-0.390966	-0.453535	-0.499611	0.68886	0.394671	0.0503135	0.0354727	0.00823287	0.0277353	0.00904508	0.00464758	0.659106	0.0477666	0.00550607	0.0119095	0.0803806	0.00803121	0.00480273	0.000841184	0.00290755	0.0546522
852007	YDR398W	UTP5	Subunit of U3-containing Small Subunit (SSU) processome complex; involved in production of 18S rRNA and assembly of small ribosomal subunit	0.539345	0.977634	0.578131	-0.390183	0.361209	-0.650561	0.0170786	blue	0.705558	-0.518141	-0.437882	-0.615783	-0.558946	-0.626658	-0.666773	0.159365	-0.224544	-0.395358	-0.668816	0.0190596	-0.47973	-0.69901	-0.536078	-0.502653	-0.168217	0.248876	0.0532304	-0.858922	0.257507	0.0103598	0.0844039	0.154531	0.0330239	0.0588613	0.0292177	0.0178751	0.620794	0.482915	0.203355	0.0174015	0.953118	0.114502	0.0114231	0.072396	0.0958031	0.601255
852021	YDR412W	RRP17	Component of the pre-60S pre-ribosomal particle; required for cell viability under standard (aerobic) conditions but not under anaerobic conditions; exonuclease required for 5' end processing of pre-60S ribosomal RNA	0.46344	0.98346	0.593615	-0.400716	0.378449	-0.646526	-0.0544862	blue	0.726916	-0.479065	-0.382924	-0.583027	-0.506912	-0.575466	-0.601269	0.25629	-0.169725	-0.307395	-0.647047	0.11249	-0.409853	-0.647921	-0.458502	-0.446089	-0.0841914	0.362253	0.145951	-0.856249	0.171518	0.00739833	0.115078	0.219221	0.0466264	0.0925716	0.050254	0.0386413	0.42136	0.59795	0.331081	0.0229488	0.727787	0.185771	0.0227041	0.133835	0.146064	0.794756
852030	YDR420W	HKR1	Mucin family member that functions as an osmosensor in the HOG pathway; large, highly glycosylated protein that functions redundantly with Msb2p in Sho1p-mediated osmostresss induction of the HOG signaling pathway; cytoplasmic domain interacts with Ahk1p a scaffold protein that prevents cross talk with the Kss1p MAPK of the filamentous growth pathway; mutant displays defects in beta-1,3 glucan sy…	0.331483	0.959138	0.525218	-0.459712	0.399886	-0.609252	0.0865056	blue	0.787297	-0.394135	-0.227448	-0.394494	-0.360121	-0.455398	-0.515943	0.233112	-0.0293866	-0.188509	-0.473235	0.192899	-0.268796	-0.510597	-0.318097	-0.305153	0.0544569	0.434123	0.282503	-0.766229	0.108983	0.00236927	0.204884	0.47712	0.204434	0.2502	0.136828	0.0859624	0.46591	0.927765	0.55738	0.120209	0.548064	0.398232	0.0898344	0.313633	0.334802	0.866513
852034	YDR424C	DYN2	Cytoplasmic light chain dynein, microtubule motor protein; required for intracellular transport and cell division; involved in mitotic spindle positioning; forms complex with dynein intermediate chain Pac11p that promotes Dyn1p homodimerization, potentiates motor processivity; Dyn2p-Pac11p complex important for interaction of dynein motor complex with dynactin complex; acts as molecular glue to d…	-0.679765	-0.887889	-0.742811	-0.0343731	-0.552978	0.347653	0.0523991	blue	-0.491507	0.725421	0.655044	0.828489	0.738226	0.781985	0.792284	-0.0627873	0.521472	0.66112	0.85555	0.342286	0.720246	0.851232	0.763704	0.752338	0.438536	0.0442334	0.269592	0.695562	-0.559968	0.104618	0.00758196	0.0207801	0.000869667	0.00611489	0.00265461	0.00212336	0.846294	0.0820783	0.0192355	0.000386643	0.276122	0.00824428	0.000444598	0.00384045	0.00475709	0.153845
852039	YDR429C	TIF35	eIF3g subunit of the eukaryotic translation initiation factor 3 (eIF3); subunit of the core complex of eIF3; is essential for translation; stimulates resumption of ribosomal scanning during translation reinitiation; eIF3 is also involved in programmed stop codon readthrough	0.330494	0.958872	0.483052	-0.564363	0.345492	-0.661575	0.0654846	blue	0.789323	-0.389519	-0.249345	-0.436586	-0.367472	-0.484578	-0.52192	0.225502	-0.0413954	-0.180601	-0.520145	0.237769	-0.281639	-0.533845	-0.328624	-0.322959	0.0294215	0.459566	0.288593	-0.802699	0.0706686	0.00226688	0.210716	0.434482	0.155895	0.239947	0.110362	0.081769	0.480999	0.898361	0.574323	0.0829998	0.456788	0.375168	0.0738231	0.296977	0.305878	0.927679
852042	YDR432W	NPL3	RNA-binding protein; promotes elongation, regulates termination, and carries poly(A) mRNA from nucleus to cytoplasm; represses translation initiation by binding eIF4G; required for pre-mRNA splicing; interacts with E3 ubiquitin ligase Bre1p, linking histone ubiquitination to mRNA processing; may have role in telomere maintenance; dissociation from mRNAs promoted by Mtr10p; phosphorylated by Sky1p…	0.321186	0.895461	0.432858	-0.432166	0.668828	-0.280377	0.235478	blue	0.666941	-0.624792	-0.37889	-0.529665	-0.429695	-0.661958	-0.707066	-0.141754	-0.328076	-0.424685	-0.621548	-0.0993445	-0.49665	-0.63217	-0.52058	-0.559362	-0.25021	0.147817	0.0600566	-0.545024	0.4303	0.0178359	0.0298469	0.224524	0.0765453	0.163282	0.0190293	0.0101259	0.660332	0.297832	0.168789	0.0309643	0.758708	0.100486	0.0274142	0.0826967	0.0586325	0.432837
852051	YDR441C	APT2	Potential adenine phosphoribosyltransferase; encodes a protein with similarity to adenine phosphoribosyltransferase, but artificially expressed protein exhibits no enzymatic activity; APT2 has a paralog, APT1, that arose from the whole genome duplication	0.483482	0.969066	0.608196	-0.420283	0.295642	-0.711017	0.0125423	blue	0.766097	-0.416335	-0.33369	-0.540375	-0.470391	-0.523098	-0.554229	0.294713	-0.101072	-0.290431	-0.596828	0.123398	-0.369366	-0.61021	-0.432197	-0.39345	-0.0414758	0.369935	0.152012	-0.883988	0.137174	0.00366589	0.178224	0.289144	0.0697045	0.122765	0.0809594	0.0614954	0.352423	0.754624	0.359789	0.0404881	0.702407	0.237346	0.0351065	0.160575	0.205743	0.898164
852057	YDR446W	ECM11	Meiosis-specific protein; component of the Synaptonemal Complex (SC) along with Gmc2p; required for efficient crossover formation and for the efficient loading of the SC transverse filament protein, Zip1p; is SUMOlytaed in a Gmc2p manner, and SUMOylation is required for its function in meiosis; GFP fusion protein is present in discrete clusters in the nucleus throughout mitosis; may be involved i…	0.466034	0.972155	0.639341	-0.365445	0.341171	-0.66703	0.0182916	blue	0.769918	-0.398574	-0.297052	-0.512468	-0.427759	-0.501432	-0.531265	0.334897	-0.0738784	-0.247526	-0.573108	0.149481	-0.324175	-0.580552	-0.403664	-0.38156	0.0165542	0.405814	0.205505	-0.851933	0.11861	0.00339973	0.199369	0.348433	0.0884665	0.165397	0.0967438	0.075495	0.287295	0.819507	0.437952	0.051425	0.642878	0.303955	0.0477929	0.19316	0.221006	0.959276
852060	YDR449C	UTP6	Nucleolar protein; component of the small subunit (SSU) processome containing the U3 snoRNA that is involved in processing of pre-18S rRNA	0.545632	0.987558	0.592974	-0.339991	0.417221	-0.606819	-0.0270085	blue	0.702587	-0.545017	-0.454064	-0.637802	-0.572239	-0.6419	-0.684938	0.172587	-0.261904	-0.424436	-0.691568	-0.0171508	-0.507783	-0.711752	-0.559779	-0.534016	-0.192387	0.235017	0.0352656	-0.845053	0.303352	0.0108327	0.0668743	0.138128	0.0256557	0.0518611	0.024429	0.0139794	0.591697	0.410897	0.169066	0.0127273	0.95781	0.0919192	0.00942366	0.0584042	0.0737128	0.549148
852070	YDR459C	PFA5	Palmitoyltransferase with autoacylation activity; likely functions in pathway(s) outside Ras; member of a family of putative palmitoyltransferases containing an Asp-His-His-Cys-cysteine rich (DHHC-CRD) domain	0.304203	0.950886	0.567345	-0.328018	0.576911	-0.420431	0.00332286	blue	0.760555	-0.518664	-0.322952	-0.510596	-0.438652	-0.543648	-0.560066	0.22365	-0.135111	-0.319979	-0.597024	0.0409893	-0.380354	-0.58998	-0.412943	-0.418592	-0.0794986	0.367141	0.153823	-0.661183	0.25449	0.00407965	0.0840361	0.305888	0.0898357	0.153724	0.0677008	0.0582471	0.484704	0.675462	0.310618	0.0404055	0.899354	0.22259	0.0434573	0.182149	0.175642	0.805998
852072	YDR461W	MFA1	Mating pheromone a-factor; made by a cells; interacts with alpha cells to induce cell cycle arrest and other responses leading to mating; biogenesis involves C-terminal modification, N-terminal proteolysis, and export; also encoded by MFA2	0.255607	0.425215	0.534817	0.167445	0.350236	-0.0648811	0.439974	blue	0.527944	-0.114863	0.0880554	-0.0544578	-0.00789384	-0.0872634	-0.122914	0.241498	0.101755	-0.211983	-0.0694746	-0.178573	-0.0616519	-0.132197	-0.189614	-0.129041	0.111756	0.0658491	0.0482093	-0.161538	0.261205	0.0776855	0.722243	0.785526	0.866511	0.980575	0.787416	0.703526	0.449543	0.753013	0.508342	0.830123	0.5787	0.849045	0.682135	0.555029	0.689384	0.729503
852075	YDR464W	SPP41	Protein of unknown function; involved in negative regulation of expression of spliceosome components PRP4 and PRP3; relocalizes to the cytosol in response to hypoxia	0.381022	0.966863	0.597224	-0.285511	0.629978	-0.380373	0.112182	blue	0.661236	-0.619913	-0.408609	-0.551681	-0.501036	-0.642539	-0.691362	0.0350426	-0.274152	-0.360232	-0.635983	-0.0124564	-0.457878	-0.663415	-0.486008	-0.519287	-0.148965	0.257613	0.121309	-0.641525	0.332712	0.0192068	0.0315388	0.187242	0.0629524	0.09705	0.0242416	0.0127649	0.913903	0.388528	0.250043	0.0262146	0.969352	0.134433	0.0186745	0.109159	0.0835986	0.644039
852076	YDR465C	RMT2	Arginine N5 methyltransferase; methylates ribosomal protein Rpl12 (L12) on Arg67; relative distribution to the nucleus increases upon DNA replication stress	0.483571	0.968765	0.540596	-0.448525	0.295355	-0.710469	-0.0356738	blue	0.739827	-0.435438	-0.365872	-0.552123	-0.498336	-0.549913	-0.587369	0.251318	-0.130521	-0.305753	-0.608788	0.122717	-0.394801	-0.632009	-0.450145	-0.412531	-0.0798766	0.347087	0.138796	-0.882401	0.15457	0.00594773	0.157112	0.242157	0.0626977	0.0991558	0.0639771	0.0446291	0.430735	0.685982	0.333804	0.0356526	0.703984	0.20405	0.0274656	0.141992	0.182629	0.805091
852089	YDR478W	SNM1	Ribonuclease MRP complex subunit; ribonuclease (RNase) MRP cleaves pre-rRNA and has a role in cell cycle-regulated degradation of daughter cell-specific mRNAs; binds to the NME1 RNA subunit of RNase MRP	0.474467	0.965722	0.498177	-0.476011	0.365168	-0.640476	-0.0380506	blue	0.720574	-0.503924	-0.415048	-0.604409	-0.528746	-0.613626	-0.643242	0.164542	-0.223514	-0.376764	-0.667299	0.0564578	-0.471328	-0.675688	-0.509769	-0.486622	-0.178878	0.2863	0.080316	-0.840948	0.240416	0.00820101	0.0948314	0.179707	0.0373725	0.0771528	0.0338195	0.0240365	0.609339	0.484977	0.227349	0.0177522	0.86165	0.121919	0.0158752	0.0904448	0.108646	0.578041
852093	YDR482C	CWC21	Protein involved in RNA splicing by the spliceosome; component of a complex containing Cef1p; interacts genetically with ISY1 and BUD13; may bind RNA; has similarity to S. pombe Cwf21p	0.472532	0.870319	0.619006	-0.182065	0.694887	-0.216627	0.081738	blue	0.563133	-0.779187	-0.624385	-0.803872	-0.678345	-0.812677	-0.784729	-0.103093	-0.479038	-0.662228	-0.865543	-0.35538	-0.706914	-0.826468	-0.728229	-0.737126	-0.469382	-0.0228578	-0.260632	-0.58948	0.574728	0.0565895	0.00281503	0.0299858	0.00162722	0.0153125	0.00131393	0.0025041	0.749855	0.115101	0.018963	0.000274967	0.256946	0.0101492	0.0009188	0.0072398	0.00623175	0.12368
852100	YDR489W	SLD5	Subunit of the GINS complex (Sld5p, Psf1p, Psf2p, Psf3p); complex is localized to DNA replication origins and implicated in assembly of the DNA replication machinery	0.450526	0.94069	0.778283	-0.247671	0.510349	-0.465285	0.291923	blue	0.778567	-0.50081	-0.294516	-0.525476	-0.410348	-0.538767	-0.557365	0.200343	-0.15661	-0.366599	-0.592162	-0.0498845	-0.394618	-0.594067	-0.467764	-0.455129	-0.0665059	0.27508	0.0915282	-0.69521	0.289039	0.00285152	0.0972253	0.35276	0.0793412	0.185189	0.0707033	0.0597352	0.532419	0.626922	0.241152	0.0424949	0.877644	0.204279	0.0416675	0.125157	0.13709	0.837294
852102	YDR492W	IZH1	Membrane protein involved in zinc ion homeostasis; member of the four-protein IZH family; transcription is regulated directly by Zap1p, expression induced by zinc deficiency and fatty acids; deletion increases sensitivity to elevated zinc; IZH1 has a paralog, IZH4, that arose from the whole genome duplication	0.567962	0.894849	0.598337	-0.229777	0.265498	-0.633183	0.0203277	blue	0.637746	-0.408677	-0.363698	-0.526059	-0.485954	-0.52733	-0.570035	0.260785	-0.144843	-0.314981	-0.563232	0.0606223	-0.377229	-0.617572	-0.468608	-0.429256	-0.0714526	0.258031	0.0981464	-0.785769	0.192012	0.0256728	0.187161	0.24518	0.078948	0.109205	0.0780955	0.0529792	0.412971	0.653335	0.318659	0.0565364	0.851541	0.22673	0.0323748	0.124385	0.16376	0.825351
852107	YDR496C	PUF6	Pumilio-homology domain protein; binds the 3' UTR of ASH1 mRNA and represses its translation, resulting in proper asymmetric localization of ASH1 mRNA; required at post-transcriptional step for efficient retrotransposition; absence results in decreased Ty1 Gag:GFP protein levels; co-sediments with the 60S ribosomal subunit and is required for its biogenesis	0.523429	0.970322	0.558935	-0.40787	0.306104	-0.698521	-0.0251243	blue	0.714578	-0.460024	-0.393323	-0.571732	-0.52507	-0.573328	-0.618738	0.221608	-0.17212	-0.338524	-0.622695	0.0833692	-0.427007	-0.65587	-0.484325	-0.445657	-0.110682	0.300445	0.104794	-0.881333	0.193263	0.00901809	0.132383	0.205902	0.0521169	0.0796159	0.0513148	0.0319566	0.488804	0.592716	0.281779	0.0305661	0.796723	0.166222	0.0205651	0.110575	0.146502	0.732018
852130	YDR518W	EUG1	Protein disulfide isomerase of the endoplasmic reticulum lumen; EUG1 has a paralog, PDI1, that arose from the whole genome duplication; function overlaps with that of Pdi1p; may interact with nascent polypeptides in the ER	-0.359012	-0.801617	-0.155163	0.597911	-0.129525	0.720314	0.336346	blue	-0.594556	0.358665	0.399997	0.506289	0.508489	0.495114	0.5404	-0.173738	0.123543	0.277434	0.554051	-0.158792	0.390639	0.568885	0.387648	0.331354	0.173526	-0.299767	-0.0767036	0.844417	-0.101666	0.0414567	0.25226	0.19762	0.0930394	0.0913934	0.101709	0.0696886	0.589189	0.702071	0.382642	0.0615966	0.622066	0.209291	0.0535692	0.213108	0.292742	0.58965
852135	YDR523C	SPS1	Putative protein serine/threonine kinase; localizes to the nucleus and cytoplasm; required for efficient spore packaging, prospore membrane development and closure and localization of enzymes involved in spore wall synthesis; interacts with and required for Ssp1p phosphorylation and turnover; member of the GCKIII subfamily of STE20 kinases; multiply phosphorylated on S/T residues; interacts with …	0.348667	0.975544	0.533734	-0.491416	0.430066	-0.595024	-0.0280233	blue	0.777525	-0.495677	-0.359707	-0.56092	-0.475391	-0.568427	-0.579272	0.228261	-0.135165	-0.30153	-0.645358	0.120492	-0.398949	-0.626477	-0.421406	-0.415747	-0.0941767	0.408111	0.164145	-0.796867	0.174774	0.00291372	0.10126	0.250784	0.0577821	0.118294	0.0538054	0.0484042	0.475503	0.675337	0.340862	0.0234271	0.709143	0.198908	0.0292783	0.172456	0.178901	0.770956
852139	YDR527W	RBA50	Protein involved in transcription; interacts with RNA polymerase II subunits Rpb2p, Rpb3, and Rpb11p; has similarity to human RPAP1	0.493843	0.944329	0.629812	-0.243709	0.674177	-0.308892	0.118136	blue	0.602999	-0.768826	-0.580903	-0.747741	-0.648134	-0.795759	-0.816106	-0.0955257	-0.492941	-0.598418	-0.819582	-0.251464	-0.684022	-0.812676	-0.68847	-0.712458	-0.412854	0.0510637	-0.135963	-0.634887	0.544394	0.0379386	0.0034742	0.0476264	0.00517138	0.0226448	0.00196388	0.00120539	0.767754	0.103455	0.0398201	0.00110253	0.430458	0.0141592	0.00131395	0.0133016	0.00932116	0.182253
852141	YDR528W	HLR1	Protein involved in regulation of cell wall composition and integrity; also involved in cell wall response to osmotic stress; overproduction suppresses a lysis sensitive PKC mutation; HLR1 has a paralog, LRE1, that arose from the whole genome duplication	0.369383	0.897714	0.750821	-0.310862	0.322527	-0.604499	0.250077	blue	0.819904	-0.305981	-0.127817	-0.365198	-0.281859	-0.351393	-0.366338	0.391775	0.0548031	-0.172461	-0.428039	0.158091	-0.197994	-0.442028	-0.278985	-0.244022	0.13824	0.45002	0.255147	-0.730755	0.0578651	0.00109336	0.333424	0.692202	0.243091	0.374779	0.2627	0.241512	0.207853	0.865672	0.591971	0.16509	0.623624	0.537335	0.150215	0.379876	0.444673	0.66832
852146	YDR533C	HSP31	Methylglyoxalase that converts methylglyoxal to D-lactate; involved in oxidative stress resistance, diauxic shift, and stationary phase survival; has similarity to E. coli Hsp31 and C. albicans Glx3p; member of the DJ-1/ThiJ/PfpI superfamily, which includes human DJ-1 involved in Parkinson's disease and cancer; exists as a dimer and contains a putative metal-binding site; protein abundance increa…	-0.0992751	0.669279	0.366106	-0.405812	0.324929	-0.39451	-0.140415	blue	0.508351	-0.198671	-0.0459516	-0.166593	-0.116952	-0.208673	-0.188722	0.349752	0.179042	0.265739	-0.276904	0.562043	0.0865614	-0.223504	0.0904719	-0.0110845	0.350445	0.734484	0.581816	-0.473024	-0.317828	0.0914963	0.535916	0.887234	0.604822	0.717374	0.515139	0.556927	0.26509	0.577686	0.403825	0.383589	0.0571747	0.789092	0.484997	0.779766	0.972726	0.264079
852158	YDR545W	YRF1-1	Helicase encoded by the Y' element of subtelomeric regions; highly expressed in the mutants lacking the telomerase component TLC1; potentially phosphorylated by Cdc28p	0.37541	0.909632	0.701152	-0.334626	0.489891	-0.462517	0.353149	blue	0.729085	-0.51664	-0.294975	-0.472977	-0.40634	-0.533803	-0.568982	0.0708586	-0.154186	-0.320684	-0.547773	-0.00951331	-0.375907	-0.574826	-0.416229	-0.41127	-0.0656998	0.271224	0.117639	-0.658206	0.251951	0.00713779	0.085466	0.351974	0.120438	0.189943	0.0738502	0.0535191	0.826784	0.632331	0.309493	0.0652327	0.976591	0.228494	0.0505701	0.178347	0.184105	0.839244
852167	YBL107C	MIX23	Mitochondrial intermembrane space protein of unknown function; imported via the MIA import machinery; contains an unusual twin cysteine motif (CX13C CX14C)	-0.0863262	0.789365	0.392611	-0.524519	0.692476	-0.16673	0.200753	blue	0.666397	-0.470019	-0.132618	-0.296943	-0.163217	-0.432532	-0.425764	0.0220187	-0.0797369	-0.0441181	-0.441993	0.24568	-0.178618	-0.373579	-0.148947	-0.273957	0.0637737	0.52285	0.409513	-0.356076	0.0885987	0.0179634	0.123101	0.681169	0.348619	0.612263	0.160215	0.167593	0.945848	0.805426	0.891709	0.150251	0.441486	0.578601	0.231621	0.644079	0.388879	0.843905
852184	YBL093C	ROX3	Subunit of the RNA polymerase II mediator complex; associates with core polymerase subunits to form the RNA polymerase II holoenzyme	0.344253	0.976692	0.655961	-0.362798	0.571071	-0.453728	0.110245	blue	0.793802	-0.542147	-0.330388	-0.553389	-0.437166	-0.573639	-0.582436	0.207594	-0.171928	-0.341086	-0.643279	0.0260992	-0.410818	-0.615846	-0.443482	-0.456922	-0.093965	0.366742	0.145564	-0.698246	0.266197	0.00205252	0.0686145	0.294237	0.0619729	0.155284	0.0511598	0.0469032	0.517364	0.593135	0.27792	0.0240258	0.93583	0.184635	0.0330012	0.148721	0.135353	0.771459
852188	YBL090W	MRP21	Mitochondrial ribosomal protein of the small subunit; MRP21 exhibits genetic interactions with mutations in the COX2 and COX3 mRNA 5'-untranslated leader sequences	-0.797763	-0.650128	-0.587012	-0.226987	-0.544117	0.0992132	-0.0206689	blue	-0.191649	0.825845	0.809764	0.899636	0.847671	0.875797	0.894281	0.298983	0.79518	0.927468	0.87825	0.719302	0.931932	0.916513	0.96407	0.925301	0.77409	0.517438	0.657627	0.484939	-0.854732	0.550711	0.000934375	0.00141191	6.76e-05	0.000497269	0.000188291	8.69e-05	0.345157	0.00198978	1.4e-05	0.000171146	0.00836957	1.03e-05	2.77e-05	4.44e-07	1.61e-05	0.00312611
852196	YBL082C	ALG3	Dolichol-P-Man dependent alpha(1-3) mannosyltransferase; involved in synthesis of dolichol-linked oligosaccharide donor for N-linked glycosylation of proteins; G353A missense mutation in human ortholog ALG3 implicated in carbohydrate deficient glycoprotein syndrome type IV, which is characterized by microcephaly, severe epilepsy, minimal psychomotor development, partial deficiency of sialic acids…	0.646739	0.805239	0.663028	0.131147	0.442659	-0.365266	-0.104542	blue	0.321638	-0.574254	-0.529773	-0.621477	-0.606198	-0.636272	-0.70879	0.0796673	-0.440962	-0.398666	-0.638571	-0.119691	-0.516441	-0.69433	-0.577121	-0.605854	-0.218309	0.0348827	-0.0429379	-0.638653	0.363574	0.307974	0.0508533	0.0764737	0.0309894	0.0366629	0.0261253	0.00986313	0.805593	0.151318	0.199256	0.0254224	0.711003	0.0856075	0.012231	0.0494437	0.0367985	0.495462
852207	YBL071W-A	KTI11	Zn-ribbon protein that co-purifies with Dph1 and Dph2; in a complex required for synthesis of diphthamide on translation factor eEF2 and with Elongator subunits Iki3p, Elp2p, and Elp3p; involved in modification of wobble nucleosides in tRNAs; forms a stable heterodimer with Ats1p	0.519654	0.976221	0.602101	-0.350378	0.372447	-0.640303	-0.08951	blue	0.715072	-0.517581	-0.445818	-0.642861	-0.577852	-0.61173	-0.63387	0.246726	-0.219242	-0.407405	-0.695091	0.0110303	-0.488056	-0.700032	-0.53171	-0.494709	-0.175199	0.280012	0.0325533	-0.866936	0.252525	0.00894856	0.0847991	0.146339	0.0241474	0.0490886	0.0345294	0.0268746	0.439481	0.493576	0.188673	0.0120968	0.972859	0.107453	0.011252	0.075205	0.102033	0.586011
852211	YBL068W	PRS4	5-phospho-ribosyl-1(alpha)-pyrophosphate synthetase, synthesizes PRPP; which is required for nucleotide, histidine, and tryptophan biosynthesis; one of five related enzymes, which are active as heteromultimeric complexes; PRS4 has a paralog, PRS2, that arose from the whole genome duplication; a missense mutation in the conserved residue R196 of its human homolog PRPS1 is pathogenic	0.490976	0.979085	0.519354	-0.396141	0.521776	-0.498507	0.0140243	blue	0.690882	-0.629393	-0.500161	-0.674034	-0.592213	-0.714174	-0.746143	0.0375221	-0.337309	-0.491562	-0.742333	-0.0865648	-0.575481	-0.751619	-0.608292	-0.601139	-0.292623	0.175317	-0.0162	-0.76366	0.395913	0.0128529	0.0283124	0.097729	0.0162332	0.0424727	0.00907531	0.00532157	0.907834	0.28362	0.104573	0.005693	0.789084	0.0502466	0.00482021	0.0358444	0.0386947	0.356008
852218	YBL061C	SKT5	Activator of Chs3p (chitin synthase III) during vegetative growth; recruits Chs3p to the bud neck via interaction with Bni4p; SKT5 has a paralog, SHC1, that arose from the whole genome duplication	0.180063	0.944762	0.554476	-0.489446	0.563124	-0.434426	0.232681	blue	0.827461	-0.453976	-0.180554	-0.373533	-0.288378	-0.465431	-0.487269	0.170284	-0.0327824	-0.179419	-0.484716	0.176364	-0.25331	-0.484155	-0.280763	-0.310013	0.0507822	0.478343	0.318463	-0.605473	0.14289	0.000894404	0.138214	0.574424	0.231683	0.363351	0.127307	0.108107	0.596726	0.91944	0.576871	0.110246	0.583484	0.426965	0.110719	0.376718	0.326765	0.875457
852219	YBL060W	YEL1	Guanine nucleotide exchange factor specific for Arf3p; localized to the bud neck and tip; required for localization of Arf3p to the bud neck and tip	0.190824	0.934313	0.445231	-0.453374	0.693272	-0.299363	0.0274483	blue	0.684698	-0.645608	-0.407016	-0.557047	-0.482072	-0.65185	-0.652391	-0.00391155	-0.24857	-0.344459	-0.668996	0.0278441	-0.452483	-0.647836	-0.437731	-0.490288	-0.193198	0.327389	0.132841	-0.563833	0.304095	0.0140264	0.023356	0.189136	0.0599121	0.112489	0.0216275	0.0214822	0.990374	0.435958	0.272884	0.0173602	0.931548	0.139679	0.022728	0.154689	0.105614	0.547432
852220	YBL059C-A	CMC2	Protein involved in respiratory chain complex assembly or maintenance; protein of the mitochondrial intermembrane space; contains twin Cx9C motifs that can form coiled coil-helix-coiled-coil helix fold	-0.798044	-0.719934	-0.636349	-0.146179	-0.506289	0.20983	-0.150596	blue	-0.336629	0.729092	0.66291	0.782501	0.713168	0.78197	0.845738	0.199555	0.693212	0.823099	0.773947	0.600928	0.828016	0.824486	0.874665	0.836944	0.622878	0.386694	0.482536	0.540247	-0.788727	0.284653	0.00713705	0.0187968	0.00262579	0.00921878	0.00265544	0.000527823	0.534066	0.0124302	0.00100547	0.0031352	0.0387809	0.000880982	0.000969067	0.000196634	0.000685664	0.0305028
852226	YBL054W	TOD6	PAC motif binding protein involved in rRNA and ribosome biogenesis; subunit of the RPD3L histone deacetylase complex; Myb-like HTH transcription factor; hypophosphorylated by rapamycin treatment in a Sch9p-dependent manner; activated in stochastic pulses of nuclear localization	0.616742	0.925281	0.5668	-0.311571	0.193949	-0.758105	-0.156118	blue	0.632357	-0.43048	-0.446648	-0.613424	-0.592934	-0.561783	-0.608294	0.276931	-0.197837	-0.373229	-0.635829	0.0438339	-0.45811	-0.67648	-0.519816	-0.452698	-0.147189	0.233974	0.0143881	-0.941913	0.18584	0.0273543	0.16243	0.145499	0.0338943	0.0421584	0.057315	0.0358438	0.38354	0.537664	0.232095	0.0262621	0.892403	0.134211	0.0157059	0.0832287	0.139467	0.648038
852237	YBL043W	ECM13	Non-essential protein of unknown function; induced by treatment with 8-methoxypsoralen and UVA irradiation; ECM13 has a paralog, YJR115W, that arose from the whole genome duplication	0.528452	0.919425	0.467953	-0.439322	0.202188	-0.750123	-0.155556	blue	0.710739	-0.352559	-0.348997	-0.55181	-0.480671	-0.511244	-0.539601	0.324293	-0.108992	-0.30302	-0.589225	0.128685	-0.374966	-0.602516	-0.457064	-0.400805	-0.0788121	0.320082	0.110713	-0.918722	0.125881	0.0095723	0.26101	0.266194	0.0628778	0.113691	0.0893603	0.070184	0.303768	0.73598	0.338362	0.0437941	0.690204	0.229755	0.038134	0.135216	0.196633	0.807646
852238	YBL042C	FUI1	High affinity uridine permease, localizes to the plasma membrane; also mediates low but significant transport of the cytotoxic nucleoside analog 5-fluorouridine; not involved in uracil transport; relative distribution to the vacuole increases upon DNA replication stress	0.302358	0.954878	0.481406	-0.565177	0.32448	-0.682248	0.0192453	blue	0.833508	-0.333182	-0.197994	-0.403308	-0.325838	-0.427995	-0.461184	0.320032	0.0279839	-0.145377	-0.486862	0.270411	-0.232017	-0.487294	-0.285066	-0.269911	0.0847933	0.51586	0.322731	-0.817868	0.0286932	0.000756372	0.289924	0.537335	0.19359	0.301336	0.165139	0.131283	0.310534	0.931205	0.652128	0.108446	0.395292	0.468069	0.108087	0.369133	0.396201	0.793316
852240	YBL040C	ERD2	HDEL receptor; an integral membrane protein that binds to the HDEL motif in proteins destined for retention in the endoplasmic reticulum; has a role in maintenance of normal levels of ER-resident proteins	-0.714767	-0.902427	-0.638379	0.114711	-0.331078	0.582276	0.145965	blue	-0.540551	0.595807	0.605942	0.766074	0.728738	0.702808	0.732807	-0.160024	0.398782	0.587905	0.778072	0.20748	0.648547	0.81074	0.701952	0.639676	0.364071	-0.0275413	0.209345	0.845473	-0.42177	0.0695958	0.0409214	0.0367638	0.00366754	0.00717909	0.010797	0.00670689	0.61933	0.199113	0.0443868	0.00288094	0.517599	0.0225301	0.00137849	0.0109358	0.0250893	0.244659
852241	YBL039C	URA7	Major CTP synthase isozyme (see also URA8); catalyzes the ATP-dependent transfer of the amide nitrogen from glutamine to UTP, forming CTP, the final step in de novo biosynthesis of pyrimidines; involved in phospholipid biosynthesis; capable of forming cytoplasmic filaments termed cytoophidium, especially during conditions of glucose depletion; URA7 has a paralog, URA8, that arose from the whole g…	0.557113	0.968517	0.58068	-0.341228	0.323004	-0.675379	-0.0854728	blue	0.678192	-0.49666	-0.444862	-0.620071	-0.578109	-0.604551	-0.644984	0.226657	-0.223828	-0.385207	-0.664968	0.0362595	-0.47534	-0.69526	-0.526802	-0.487467	-0.161122	0.26212	0.0496138	-0.879374	0.234568	0.0153445	0.100479	0.14731	0.0314832	0.0489641	0.0373158	0.0235341	0.478695	0.484348	0.216253	0.0183015	0.910924	0.118339	0.0120673	0.0784485	0.107942	0.616897
852246	YBL034C	STU1	Component of the mitotic spindle; binds to interpolar microtubules via its association with beta-tubulin (Tub2p); required for interpolar microtubules to provide an outward force on the spindle poles	0.664985	0.676403	0.793346	0.375784	0.54923	-0.134768	-0.0486553	blue	0.171883	-0.704077	-0.646872	-0.732991	-0.720544	-0.692479	-0.721065	-0.0515909	-0.594582	-0.597221	-0.724056	-0.426648	-0.664427	-0.755622	-0.696496	-0.709138	-0.411181	-0.215399	-0.347421	-0.504268	0.545268	0.593232	0.0105936	0.0229981	0.0066861	0.00820492	0.012562	0.00813663	0.873488	0.0414457	0.0403223	0.00775271	0.166618	0.0184308	0.00447693	0.0118521	0.0098107	0.18421
852247	YBL033C	RIB1	GTP cyclohydrolase II; catalyzes the first step of the riboflavin biosynthesis pathway	0.161503	0.940792	0.498974	-0.476876	0.65738	-0.341878	0.106939	blue	0.766722	-0.556298	-0.291478	-0.477898	-0.367472	-0.56339	-0.56948	0.102592	-0.151426	-0.252985	-0.598008	0.11057	-0.35409	-0.560913	-0.353576	-0.411235	-0.0708189	0.432827	0.245753	-0.571842	0.227566	0.00362129	0.0603304	0.357981	0.116093	0.239947	0.0564519	0.0532631	0.751036	0.63851	0.42758	0.0399913	0.732281	0.2588	0.0577862	0.259541	0.184146	0.826879
852257	YBL024W	NCL1	S-adenosyl-L-methionine-dependent tRNA: m5C-methyltransferase; methylates cytosine to m5C at several positions in tRNAs and intron-containing pre-tRNAs; increases proportion of tRNALeu(CAA) with m5C at wobble position in response to hydrogen peroxide, causing selective translation of mRNA from genes enriched in TTG codon; loss of NCL1 confers hypersensitivity to oxidative stress; similar to Nop2p…	0.476738	0.990705	0.601524	-0.344055	0.54659	-0.479669	0.121654	blue	0.719472	-0.602074	-0.434087	-0.612877	-0.536874	-0.670512	-0.704851	0.0705178	-0.276246	-0.437828	-0.68443	-0.0540591	-0.508121	-0.709984	-0.560154	-0.557462	-0.204227	0.216575	0.04878	-0.729855	0.360536	0.00834687	0.0383134	0.158549	0.0340984	0.071892	0.0170153	0.010471	0.827606	0.384768	0.154587	0.0140789	0.867481	0.0916675	0.0096842	0.058199	0.0596811	0.524331
852258	YBL023C	MCM2	Protein involved in DNA replication; component of the Mcm2-7 hexameric helicase complex that binds chromatin as a part of the pre-replicative complex; relative distribution to the nucleus increases upon DNA replication stress	-0.0477655	0.808522	0.24745	-0.674432	0.603593	-0.264345	0.300758	blue	0.747834	-0.444554	-0.130424	-0.25619	-0.194678	-0.443094	-0.451106	-0.0705726	-0.00547573	-0.127703	-0.390116	0.200471	-0.19954	-0.399694	-0.195501	-0.24814	0.00605075	0.434692	0.337817	-0.390583	0.134718	0.00516273	0.147624	0.686205	0.421546	0.544308	0.149119	0.141038	0.827473	0.986525	0.692464	0.209955	0.532151	0.534098	0.197993	0.542574	0.436779	0.98511
852265	YBL016W	FUS3	Mitogen-activated serine/threonine protein kinase involved in mating; phosphoactivated by Ste7p; substrates include Ste12p, Far1p, Bni1p, Sst2p; inhibits invasive growth during mating by phosphorylating Tec1p, promoting its; inhibits recruitment of Ste5p, Cdc42p-mediated asymmetry and mating morphogenesis	0.264617	0.839053	0.601137	-0.191685	0.72227	-0.147985	0.259114	blue	0.717289	-0.596745	-0.311699	-0.498092	-0.395491	-0.563163	-0.56075	0.054573	-0.228568	-0.46156	-0.586809	-0.197615	-0.45338	-0.577234	-0.47908	-0.490553	-0.211951	0.177136	-0.00354848	-0.409591	0.462046	0.00864147	0.0405235	0.324002	0.0993475	0.20319	0.0565731	0.0578747	0.866231	0.474893	0.130928	0.0448831	0.538131	0.138798	0.0493887	0.115065	0.105397	0.508407
852269	YBL014C	RRN6	Component of the core factor (CF) rDNA transcription factor complex; CF is required for transcription of 35S rRNA genes by RNA polymerase I and is composed of Rrn6p, Rrn7p, and Rrn11p	0.46297	0.976852	0.530013	-0.357843	0.491679	-0.5267	-0.0318497	blue	0.638418	-0.616017	-0.496391	-0.627674	-0.607826	-0.680333	-0.72637	0.0501897	-0.297388	-0.414276	-0.693752	-0.0117391	-0.522922	-0.732032	-0.543338	-0.538568	-0.225301	0.22141	0.0387983	-0.770664	0.314369	0.0254686	0.0329384	0.100692	0.0288788	0.0360254	0.014901	0.0074651	0.8769	0.347862	0.1806	0.0123338	0.971116	0.0810797	0.00679498	0.0678885	0.0708276	0.4814
852282	YBL004W	UTP20	Component of the small-subunit (SSU) processome; SSU processome is involved in the biogenesis of the 18S rRNA	0.457262	0.977248	0.505483	-0.458956	0.365378	-0.651481	-0.00188255	blue	0.763335	-0.463833	-0.359501	-0.538418	-0.488109	-0.563902	-0.610094	0.202847	-0.14786	-0.339623	-0.601957	0.0814562	-0.414555	-0.632704	-0.465651	-0.430178	-0.109808	0.319993	0.128399	-0.834752	0.217115	0.00386786	0.128794	0.251075	0.0709215	0.10741	0.0561788	0.035151	0.527198	0.646526	0.280119	0.0383608	0.801304	0.180277	0.0272438	0.127104	0.162757	0.734068
852287	YBR002C	RER2	Forms the dehydrodolichyl diphosphate syntase (DDS) complex with NUS1; major enzyme of polyprenol synthesis in both the endoplasmic reticulum (ER) and in lipid droplets; participates in ER protein sorting; human ortholog DHDDS functionally complements the heat sensitive growth defect of a ts allele, and is associated with retinitis pigmentosa	0.260431	0.966403	0.530735	-0.472718	0.595955	-0.419379	0.192328	blue	0.769278	-0.531311	-0.286339	-0.466608	-0.372558	-0.570927	-0.596079	0.082087	-0.143478	-0.253785	-0.573095	0.118176	-0.34639	-0.575708	-0.381422	-0.422218	-0.0468966	0.393435	0.251535	-0.6279	0.219805	0.00344319	0.075465	0.366906	0.126219	0.233001	0.0525248	0.0408055	0.799793	0.656422	0.42607	0.0514313	0.714524	0.270026	0.050135	0.221187	0.171543	0.884928
852291	YBR006W	UGA2	Succinate semialdehyde dehydrogenase; involved in the utilization of gamma-aminobutyrate (GABA) as a nitrogen source; part of the 4-aminobutyrate and glutamate degradation pathways; localized to the cytoplasm	0.327592	0.914548	0.640393	-0.249405	0.678567	-0.273086	0.178855	blue	0.766257	-0.583573	-0.333595	-0.553526	-0.422226	-0.589138	-0.586246	0.140817	-0.222493	-0.437416	-0.642003	-0.124294	-0.456819	-0.613667	-0.496473	-0.51028	-0.178737	0.249602	0.0450961	-0.546339	0.406079	0.00365439	0.046372	0.289289	0.0618953	0.171534	0.043833	0.0451399	0.662458	0.487025	0.155021	0.0243987	0.700333	0.135453	0.0338041	0.100627	0.0900677	0.578345
852292	YBR007C	DSF2	Deletion suppressor of mpt5 mutation; relocalizes from bud neck to cytoplasm upon DNA replication stress	0.564419	0.679929	0.884659	0.33678	0.500925	-0.178641	0.191133	blue	0.280708	-0.547598	-0.425764	-0.534885	-0.512185	-0.532144	-0.558887	0.0646018	-0.353113	-0.373285	-0.543165	-0.227347	-0.422694	-0.592489	-0.500404	-0.523681	-0.131562	-0.0196108	-0.103037	-0.460874	0.343905	0.376816	0.0653358	0.167593	0.0731559	0.0886722	0.0749226	0.0588934	0.8419	0.260208	0.232019	0.0679936	0.47732	0.171009	0.0423521	0.0975404	0.0805604	0.68359
852293	YBR008C	FLR1	Plasma membrane transporter of the major facilitator superfamily; member of the 12-spanner drug:H(+) antiporter DHA1 family; involved in efflux of fluconazole, diazaborine, benomyl, methotrexate, and other drugs; expression induced in cells treated with the mycotoxin patulin; relocalizes from nucleus to plasma membrane upon DNA replication stress	-0.0710157	0.624264	0.201992	-0.455793	0.278569	-0.400093	-0.215527	blue	0.325677	-0.2732	-0.177303	-0.202086	-0.221723	-0.299699	-0.316254	0.116938	0.0454443	0.247713	-0.303769	0.552771	0.00648228	-0.291309	0.0436152	-0.0729257	0.237367	0.611105	0.522495	-0.47574	-0.292563	0.301589	0.390244	0.581447	0.528783	0.488575	0.343946	0.3166	0.717406	0.888472	0.437594	0.33711	0.0623263	0.984048	0.358273	0.892937	0.821801	0.457573
852309	YBR021W	FUR4	Plasma membrane localized uracil permease; expression is tightly regulated by uracil levels and environmental cues; conformational alterations induced by unfolding or substrate binding result in Rsp5p-mediated ubiquitination and degradation	0.229536	0.947075	0.46454	-0.578609	0.352771	-0.650448	-0.00516639	blue	0.822214	-0.338586	-0.1855	-0.380117	-0.309629	-0.413617	-0.441479	0.3202	0.047364	-0.0978552	-0.474831	0.315783	-0.201801	-0.466378	-0.236574	-0.238539	0.113281	0.568242	0.368175	-0.782444	-0.00900487	0.00102923	0.281685	0.563803	0.222904	0.327396	0.181365	0.150782	0.310265	0.883788	0.762233	0.118789	0.317361	0.529377	0.126431	0.45912	0.455288	0.725938
852311	YBR023C	CHS3	Chitin synthase III; catalyzes the transfer of N-acetylglucosamine (GlcNAc) to chitin; required for synthesis of the majority of cell wall chitin, the chitin ring during bud emergence, and spore wall chitosan; contains overlapping di-leucine and di-acidic signals that mediate, respectively, intracellular trafficking by AP-1 and trafficking to plasma membrane by exomer complex; requires AP-3 compl…	0.199427	0.921841	0.635608	-0.331978	0.615375	-0.355877	0.219128	blue	0.783602	-0.472566	-0.19063	-0.380175	-0.299652	-0.455674	-0.479299	0.199215	-0.0575028	-0.199357	-0.483733	0.113226	-0.261377	-0.480594	-0.291534	-0.325793	0.0520566	0.44253	0.281548	-0.559387	0.183028	0.0025651	0.120806	0.552872	0.222827	0.344026	0.13656	0.114875	0.534776	0.859111	0.53448	0.111076	0.726067	0.411872	0.113757	0.357885	0.301406	0.872354
852316	YBR028C	YPK3	AGC kinase; phosphorylated by cAMP-dependent protein kinase (PKA) in a TORC1-dependent manner; directly phosphorylated by TORC1; phosphorylates ribosomal protein Rps6a/b (S6), in a TORC-dependent manner; undergoes autophosphorylation	0.444138	0.882358	0.690266	-0.0483323	0.590238	-0.315743	0.13632	blue	0.585063	-0.523102	-0.344189	-0.493052	-0.432111	-0.557388	-0.601299	0.137618	-0.208819	-0.30719	-0.552665	-0.0347221	-0.365191	-0.588322	-0.453475	-0.482753	-0.047625	0.221333	0.123803	-0.580116	0.296416	0.0456821	0.0809568	0.273286	0.103365	0.160668	0.0597226	0.0386293	0.669737	0.51484	0.33142	0.062387	0.914688	0.243102	0.044199	0.138705	0.111909	0.883152
852322	YBR034C	HMT1	Nuclear SAM-dependent mono- and asymmetric methyltransferase; modifies hnRNPs, including Npl3p and Hrp1p, affecting their activity and nuclear export; methylates U1 snRNP protein Snp1p, ribosomal protein Rps2p, and histones H3 and H4; interacts genetically with genes encoding components of Rpd3(L) and this interaction is important for Rpd3 recruitment to the subtelomeric region	0.436958	0.985762	0.579616	-0.438036	0.379781	-0.646563	0.0419594	blue	0.801522	-0.447712	-0.31865	-0.522777	-0.44898	-0.533309	-0.572359	0.261338	-0.116102	-0.309393	-0.592411	0.101237	-0.382059	-0.6052	-0.433254	-0.405382	-0.0603764	0.373166	0.166799	-0.82848	0.191991	0.00171979	0.144426	0.312746	0.0811795	0.143154	0.0741683	0.0518005	0.411946	0.719355	0.327784	0.0423863	0.754235	0.220352	0.0370577	0.159441	0.191091	0.852137
852336	YBR047W	FMP23	Putative protein of unknown function; proposed to be involved in iron or copper homeostasis; the authentic, non-tagged protein is detected in highly purified mitochondria in high-throughput studies	0.344142	0.600161	0.74288	0.254349	0.535578	-0.08649	-0.00133805	blue	0.152435	-0.531176	-0.414216	-0.497373	-0.447187	-0.502737	-0.503126	0.0431263	-0.333984	-0.176087	-0.535431	-0.0375832	-0.31941	-0.516458	-0.34837	-0.454012	-0.0483118	0.136669	0.0515204	-0.38031	0.170551	0.636248	0.0755532	0.18067	0.0999147	0.144954	0.0957393	0.0954411	0.894132	0.288692	0.584084	0.0728079	0.907684	0.311527	0.0855956	0.267113	0.138179	0.881477
852344	YBR055C	PRP6	Splicing factor; component of the U4/U6-U5 snRNP complex	0.353971	0.984387	0.554745	-0.416648	0.58583	-0.443745	0.155314	blue	0.766344	-0.566921	-0.355231	-0.53303	-0.453943	-0.616778	-0.647007	0.0799957	-0.190374	-0.353769	-0.62352	0.0223709	-0.424608	-0.639643	-0.46887	-0.48105	-0.124181	0.307807	0.145713	-0.677222	0.298214	0.00364821	0.0545874	0.25716	0.0743487	0.138246	0.0326619	0.02296	0.804806	0.553415	0.259262	0.0302816	0.944983	0.168874	0.0250992	0.124146	0.113365	0.700594
852348	YBR057C	MUM2	Protein essential for meiotic DNA replication and sporulation; cytoplasmic protein; subunit of the MIS complex which controls mRNA methylation during during the induction of sporulation; also interacts with Orc2p, which is a component of the origin recognition complex	0.123895	0.785789	0.547697	-0.367878	0.441563	-0.380134	0.446574	blue	0.841583	-0.191024	0.0977746	-0.0977466	-0.00850716	-0.2058	-0.248334	0.28758	0.214371	-0.00239932	-0.191921	0.23658	0.00878199	-0.221341	-0.0916036	-0.0974018	0.299411	0.507512	0.446733	-0.462411	0.0206172	0.000598423	0.552036	0.762424	0.76249	0.979066	0.521072	0.436408	0.364739	0.503464	0.994095	0.550134	0.459109	0.97839	0.489342	0.777072	0.763307	0.344433
852350	YBR058C-A	TSC3	Protein that stimulates the activity of serine palmitoyltransferase; involved in sphingolipid biosynthesis; Lcb1p and Lcb2p are the two components of serine palmitoyltransferase	-0.824327	-0.64706	-0.569902	-0.267949	-0.49507	0.137463	0.0897105	blue	-0.141494	0.814839	0.855834	0.925421	0.893507	0.888733	0.900585	0.257399	0.772037	0.898105	0.897331	0.676326	0.917464	0.941315	0.962038	0.921487	0.754909	0.49653	0.651213	0.52098	-0.801438	0.660921	0.00124466	0.000383052	1.6e-05	9e-05	0.00011112	6.46e-05	0.419283	0.00325859	7.27e-05	7.54e-05	0.0157388	2.62e-05	4.97e-06	5.83e-07	2.06e-05	0.00453668
852353	YBR061C	TRM7	2'-O-ribose methyltransferase; methylates the 2'-O-ribose of tRNA-Phe, tRNA-Trp, and tRNA-Leu at positions C32 and N34 of tRNA anticodon loop; crucial biological role likely modification of tRNA-Phe; interacts with Trm732p and Rtt10p in 2'-O-methylation of C32 and N34 substrate tRNAs, respectively; yeast null mutant can be functionally complemented by human FTSJ1, mutations in which have been imp…	0.435441	0.997814	0.586159	-0.397363	0.475773	-0.565755	0.0175141	blue	0.74508	-0.541134	-0.403475	-0.590663	-0.518177	-0.617742	-0.646246	0.175378	-0.194931	-0.355696	-0.664751	0.0499397	-0.444497	-0.672833	-0.48905	-0.482543	-0.126621	0.324362	0.118539	-0.797212	0.247931	0.00542337	0.0692362	0.193388	0.0431546	0.0843787	0.0323135	0.0231748	0.585623	0.543776	0.256492	0.0183534	0.877509	0.147682	0.0164968	0.106631	0.112087	0.69496
852357	YBR065C	ECM2	Pre-mRNA splicing factor; facilitates the cooperative formation of U2/U6 helix II in association with stem II in the spliceosome, function may be regulated by Slu7p	0.0421743	0.880009	0.403618	-0.516654	0.699693	-0.241291	0.247485	blue	0.714978	-0.538479	-0.229654	-0.359279	-0.285766	-0.529046	-0.544575	-0.0426354	-0.0862715	-0.160909	-0.49188	0.158796	-0.261298	-0.488654	-0.266221	-0.344428	-0.00365148	0.430015	0.320423	-0.442357	0.18094	0.00896182	0.0708831	0.47274	0.25139	0.367907	0.0769538	0.0671403	0.895331	0.789784	0.61737	0.104315	0.622058	0.412019	0.106958	0.40294	0.27293	0.991014
852358	YBR066C	NRG2	Transcriptional repressor; mediates glucose repression and negatively regulates filamentous growth; activated in stochastic pulses of nuclear localization in response to low glucose	0.158841	0.76264	0.451564	-0.241482	0.520457	-0.291152	-0.316425	blue	0.473648	-0.472341	-0.364589	-0.530458	-0.421546	-0.505514	-0.458305	0.251859	-0.17039	-0.147743	-0.616052	0.178266	-0.297207	-0.525532	-0.296938	-0.379762	-0.0440911	0.431613	0.197624	-0.554165	0.0656655	0.11984	0.121008	0.243938	0.0760234	0.172298	0.0936241	0.134023	0.429708	0.596495	0.646791	0.0329257	0.579363	0.348169	0.0793038	0.348627	0.223371	0.891775
852361	YBR069C	TAT1	Amino acid transporter for valine, leucine, isoleucine, and tyrosine; low-affinity tryptophan and histidine transporter; overexpression confers FK506 and FTY720 resistance; protein abundance increases in response to DNA replication stress	0.409128	0.874537	0.31851	-0.482242	0.453047	-0.451934	0.162565	blue	0.663051	-0.549239	-0.410268	-0.516396	-0.49776	-0.637953	-0.691741	-0.106855	-0.245076	-0.456132	-0.582122	-0.0852373	-0.495726	-0.65593	-0.539335	-0.504736	-0.276199	0.102414	-0.0073652	-0.632778	0.389253	0.0187626	0.0643707	0.185283	0.0856401	0.0996095	0.0256098	0.0126959	0.741	0.442646	0.136117	0.0470507	0.792255	0.101221	0.0205494	0.0703495	0.0942131	0.384851
852364	YBR072W	HSP26	Small heat shock protein (sHSP) with chaperone activity; forms hollow, sphere-shaped oligomers that suppress unfolded proteins aggregation; long-lived protein that is preferentially retained in mother cells and forms cytoplasmic foci; oligomer activation requires heat-induced conformational change; also has mRNA binding activity	0.701757	0.857529	0.667844	-0.0537975	0.518994	-0.347164	0.14505	blue	0.613733	-0.624631	-0.519558	-0.729532	-0.602608	-0.708439	-0.735913	0.0459091	-0.456136	-0.708479	-0.749907	-0.412072	-0.686063	-0.764153	-0.772552	-0.72193	-0.433442	-0.1159	-0.28467	-0.656327	0.634589	0.0337797	0.0299019	0.0834091	0.00708501	0.0380965	0.00991615	0.00636258	0.887337	0.136113	0.0099102	0.00497294	0.183165	0.0137608	0.00380717	0.00322493	0.00802423	0.159239
852365	YBR073W	RDH54	DNA-dependent ATPase; DNA recombination/repair translocase, supercoils DNA and promotes DNA strand opening; stimulates strand exchange by modifying dsDNA topology; involved in recombinational repair of DNA double-strand breaks (DSBs) during mitosis and meiosis; phosphorylated in Mec1p-, Rad53p-dependent way in response to one DSB; contributes to remodelling of nucleosomes; proposed to be involved…	0.396696	0.892903	0.846452	-0.170252	0.492397	-0.432077	0.254896	blue	0.756251	-0.439501	-0.218982	-0.478647	-0.333834	-0.451466	-0.454884	0.320413	-0.124073	-0.28032	-0.548117	0.0119232	-0.320915	-0.514745	-0.381522	-0.391595	0.0153737	0.358622	0.159247	-0.647786	0.213497	0.00442464	0.152837	0.494101	0.115441	0.288923	0.140682	0.137329	0.309925	0.700846	0.377504	0.0650293	0.970663	0.309124	0.08682	0.221055	0.20808	0.962178
852366	YBR074W	PFF1	Multi-spanning vacuolar membrane protease; glycosylated transmembrane protein bearing homology to the M28 family of metalloproteases; has a lumenal-facing protease domain; proposed role in vacuole physiology	0.00885165	0.829559	0.304505	-0.543599	0.665836	-0.218831	0.300517	blue	0.72382	-0.460977	-0.128913	-0.244387	-0.179304	-0.447298	-0.49543	-0.0560022	-0.0577812	-0.122494	-0.37762	0.178182	-0.20642	-0.3955	-0.210155	-0.285852	0.0280565	0.420392	0.373597	-0.369249	0.191188	0.00778251	0.131479	0.689678	0.44397	0.57712	0.144843	0.101457	0.862757	0.858435	0.704499	0.22621	0.579545	0.519788	0.203178	0.512092	0.367757	0.931027
852371	YBR079C	RPG1	eIF3a subunit of the eukaryotic translation initiation factor 3 (eIF3); subunit of the core complex of eIF3; essential for translation; part of a Prt1p-Rpg1p-Nip1p subcomplex that stimulates binding of mRNA and tRNA(i)Met to ribosomes; involved in translation reinitiation; eIF3 is also involved in programmed stop codon readthrough	0.379568	0.914813	0.516467	-0.336654	0.704577	-0.250449	0.286325	blue	0.631542	-0.688811	-0.440918	-0.577644	-0.497098	-0.718708	-0.757128	-0.178713	-0.371224	-0.474827	-0.664307	-0.154941	-0.541872	-0.697043	-0.576234	-0.613863	-0.286682	0.0945474	0.00743847	-0.528146	0.476419	0.0276153	0.0132374	0.151363	0.0491894	0.100132	0.0084491	0.00435267	0.578397	0.234812	0.118792	0.0184595	0.630644	0.0687828	0.0117577	0.0498771	0.0337312	0.366306
852378	YBR084W	MIS1	Mitochondrial C1-tetrahydrofolate synthase; involved in interconversion between different oxidation states of tetrahydrofolate (THF); provides activities of formyl-THF synthetase, methenyl-THF cyclohydrolase, and methylene-THF dehydrogenase	0.71088	0.805862	0.50117	-0.142632	0.37749	-0.427769	0.152278	blue	0.40436	-0.638546	-0.605485	-0.685438	-0.679671	-0.756655	-0.816318	-0.19638	-0.481825	-0.609961	-0.695417	-0.29112	-0.659619	-0.798777	-0.736487	-0.695071	-0.433635	-0.178347	-0.24917	-0.664535	0.518021	0.192319	0.0254299	0.0369446	0.013882	0.0150371	0.00439139	0.00119889	0.540724	0.112701	0.0352017	0.0120398	0.358598	0.0196089	0.00183295	0.00630039	0.0121004	0.159032
852380	YBR085W	AAC3	Mitochondrial inner membrane ADP/ATP translocator; exchanges cytosolic ADP for mitochondrially synthesized ATP; expressed under anaerobic conditions; similar to Aac1p; has roles in maintenance of viability and in respiration; AAC3 has a paralog, PET9, that arose from the whole genome duplication	-0.548477	-0.792498	-0.411067	0.333187	-0.218866	0.610089	0.355884	blue	-0.455825	0.548158	0.617919	0.768502	0.711508	0.668525	0.664195	-0.123104	0.391407	0.504989	0.790472	0.0995897	0.623289	0.757789	0.612822	0.569044	0.398785	-0.0920488	0.199122	0.852251	-0.290921	0.136414	0.0650054	0.03225	0.00349653	0.00945929	0.0174684	0.0184865	0.703086	0.208318	0.0940213	0.00221034	0.758128	0.030361	0.00429897	0.0341192	0.0534873	0.199109
852386	YBR089C-A	NHP6B	High-mobility group (HMG) protein; binds to and remodels nucleosomes; involved in recruiting FACT and other chromatin remodelling complexes to the chromosomes; functionally redundant with Nhp6Ap; required for transcriptional initiation fidelity of some tRNA genes; homologous to mammalian HMGB1 and HMGB2; NHP6B has a paralog, NHP6A, that arose from the whole genome duplication	0.509628	0.823767	0.860607	0.00301432	0.514132	-0.333541	0.175317	blue	0.603841	-0.521453	-0.379616	-0.621864	-0.460412	-0.56159	-0.540838	0.233142	-0.247425	-0.410414	-0.665827	-0.162623	-0.438614	-0.617386	-0.523658	-0.531274	-0.127704	0.171982	-0.0398845	-0.629431	0.323966	0.0375998	0.0820913	0.223564	0.0308543	0.132014	0.0574191	0.0694184	0.465852	0.438145	0.18511	0.0180978	0.613576	0.153763	0.0324419	0.0805762	0.0754891	0.692463
852388	YBR091C	TIM12	Essential protein of the inner mitochondrial membrane; peripherally localized; component of the TIM22 complex, which is a twin-pore translocase that mediates insertion of numerous multispanning inner membrane proteins	0.38724	0.955928	0.712042	-0.293023	0.503057	-0.485543	0.146062	blue	0.742092	-0.534565	-0.353804	-0.555152	-0.461889	-0.570948	-0.579565	0.213411	-0.156151	-0.317761	-0.637205	0.0403647	-0.394954	-0.628233	-0.435264	-0.444084	-0.0704956	0.361284	0.140932	-0.700984	0.228019	0.00571712	0.0733608	0.259211	0.0609738	0.130618	0.0525137	0.0482637	0.505422	0.627945	0.314173	0.0258381	0.900881	0.203859	0.0286938	0.157296	0.148104	0.827659
852401	YBR104W	YMC2	Putative mitochondrial inner membrane transporter; proposed role in oleate metabolism and glutamate biosynthesis; member of the mitochondrial carrier (MCF) family; YMC2 has a paralog, YMC1, that arose from the whole genome duplication	-0.138288	-0.800584	-0.489325	0.262824	-0.575238	0.281391	0.0937151	blue	-0.687967	0.397561	0.211108	0.409089	0.291028	0.410141	0.39396	-0.313234	0.0221839	0.17678	0.500218	-0.107402	0.230003	0.431767	0.266929	0.303484	-0.0390019	-0.444244	-0.227006	0.530422	-0.13657	0.0133966	0.200619	0.510135	0.186673	0.358758	0.185432	0.205103	0.321496	0.945443	0.58258	0.0976851	0.739714	0.472048	0.161039	0.401643	0.337586	0.904213
852402	YBR105C	VID24	GID Complex regulatory subunit; binds GID Complex in response to glucose through interactions with complex member Vid28p; regulates fructose-1,6-bisphosphatase (FBPase) targeting to the vacuole; promotes proteasome-dependent catabolite degradation of FBPase; peripheral membrane protein located at Vid (vacuole import and degradation) vesicles	0.468402	0.972058	0.597598	-0.403896	0.367443	-0.645536	0.0642134	blue	0.826633	-0.410846	-0.282153	-0.504363	-0.418968	-0.499692	-0.544388	0.29752	-0.101511	-0.332025	-0.564238	0.0595752	-0.375282	-0.57719	-0.442783	-0.398489	-0.0532866	0.341972	0.141959	-0.832906	0.217976	0.000914711	0.184603	0.37426	0.0944969	0.175214	0.0980948	0.0672534	0.347638	0.753589	0.291705	0.0560003	0.854081	0.229332	0.0494102	0.149438	0.199474	0.86936
852403	YBR106W	PHO88	Protein involved in SRP-independent targeting of substrates to the ER; component of an alternative ER targeting pathway that has partial functional redundancy with the GET pathway; preference for substrates with downstream transmembrane domains; interacts with Snd1p, Env10p/Snd2p, and Sec61p-translocon subunits; can compensate for loss of SRP; role in phosphate transport, interacting with pho88, …	0.128816	0.832981	0.472404	-0.594476	0.382957	-0.49503	0.395546	blue	0.916702	-0.195143	0.0882752	-0.160255	-0.00466655	-0.244108	-0.280546	0.293596	0.14218	-0.0271461	-0.26831	0.291548	-0.0561476	-0.251675	-0.122504	-0.138993	0.225851	0.559306	0.468443	-0.556385	0.0214454	2.74e-05	0.543329	0.785001	0.618819	0.988516	0.444508	0.377104	0.354337	0.659364	0.933261	0.399118	0.357861	0.862403	0.430058	0.704478	0.666606	0.480301
852411	YBR114W	RAD16	Nucleotide excision repair (NER) protein; binds damaged DNA during NER; binds DNA in an ATP-dependent manner (with Rad7p) during NER; required for NER of non-transcribed chromatin; subunit of Nucleotide Excision Repair Factor 4 (NEF4) and the Elongin-Cullin-Socs (ECS) ligase complex	0.140954	0.907074	0.474546	-0.505478	0.649004	-0.316273	0.251319	blue	0.85604	-0.495757	-0.197971	-0.401158	-0.284548	-0.496039	-0.506415	0.101799	-0.0754043	-0.291028	-0.51734	0.0394473	-0.322682	-0.493515	-0.341641	-0.362494	-0.0609227	0.388602	0.2127	-0.52269	0.276563	0.000380453	0.101196	0.537384	0.196201	0.370042	0.100971	0.0929449	0.752908	0.815834	0.358758	0.0849695	0.903124	0.306316	0.102992	0.277088	0.246862	0.850813
852418	YBR121C	GRS1	Cytoplasmic and mitochondrial glycyl-tRNA synthase; ligates glycine to the cognate anticodon-bearing tRNA; transcription termination factor that may interact with the 3'-end of pre-mRNA to promote 3'-end formation; GRS1 has a paralog, GRS2, that arose from the whole genome duplication; human homolog GARS implicated in Charcot-Marie-Tooth disease, can complement yeast null mutant	0.580526	0.857703	0.688943	0.0331162	0.751308	-0.120286	0.152934	blue	0.413388	-0.829238	-0.655864	-0.784623	-0.698663	-0.851202	-0.862134	-0.199156	-0.603639	-0.663031	-0.833277	-0.391283	-0.729536	-0.853906	-0.770854	-0.813462	-0.479452	-0.13118	-0.252519	-0.494883	0.645927	0.181632	0.000851978	0.0205667	0.00250983	0.0114816	0.000445023	0.000309775	0.5349	0.0376807	0.0187674	0.000761334	0.208475	0.00708457	0.000407966	0.0033368	0.00128843	0.114743
852432	YBR135W	CKS1	Cyclin-dependent protein kinase regulatory subunit and adaptor; interacts with Cdc28p (aka Cdk1p); required for G1/S and G2/M phase transitions and budding; mediates phosphorylation and degradation of Sic1p; modulates proteolysis of M-phase targets through interactions with the proteasome; role in transcriptional regulation, recruiting proteasomal subunits to target gene promoters; human homologs…	0.710076	0.823896	0.863813	0.210265	0.50444	-0.316878	0.0683531	blue	0.427325	-0.640148	-0.563967	-0.728222	-0.653913	-0.68313	-0.704357	0.114956	-0.453467	-0.567104	-0.739244	-0.315901	-0.609235	-0.762074	-0.68831	-0.679862	-0.30734	-0.0465812	-0.214914	-0.635765	0.489392	0.165873	0.0249481	0.0561443	0.00724066	0.0210774	0.0143361	0.0105491	0.722025	0.138712	0.0544921	0.00600811	0.317172	0.0354803	0.00396291	0.0133318	0.0149977	0.331172
852438	YBR141C	BMT2	Nucleolar S-adenosylmethionine-dependent rRNA methyltransferase; methylates adenine (m1A) of the large subunit (LSU) rRNA at position 2142; belongs to Rossmann fold superfamily; green fluorescent protein (GFP)-fusion protein localizes to the nucleolus; YBR141C is not an essential gene	0.535693	0.974626	0.605816	-0.360249	0.41972	-0.587658	0.0796802	blue	0.769922	-0.529762	-0.411575	-0.616981	-0.534891	-0.61807	-0.653302	0.175369	-0.232601	-0.470228	-0.671904	-0.0759015	-0.511665	-0.690608	-0.568503	-0.521888	-0.210206	0.21048	-0.00166881	-0.810372	0.349704	0.00339941	0.076481	0.183747	0.0325881	0.0731525	0.0321957	0.0212394	0.585643	0.466917	0.122912	0.0167029	0.814638	0.0890521	0.0129033	0.0537661	0.0817912	0.511987
852439	YBR142W	MAK5	Essential nucleolar protein; putative DEAD-box RNA helicase required for maintenance of M1 dsRNA virus; involved in biogenesis of large (60S) ribosomal subunits	0.428151	0.984685	0.521304	-0.461984	0.437317	-0.5895	0.0522837	blue	0.733267	-0.529382	-0.393244	-0.560144	-0.507984	-0.612952	-0.653412	0.11551	-0.196814	-0.347312	-0.633936	0.0678352	-0.440619	-0.663033	-0.479304	-0.467685	-0.137766	0.304991	0.126373	-0.790432	0.241532	0.00665508	0.0767316	0.206002	0.0582047	0.0917693	0.0340705	0.0212101	0.720734	0.539812	0.268668	0.0268538	0.834082	0.151673	0.018767	0.114871	0.125229	0.6694
852440	YBR143C	SUP45	Polypeptide release factor (eRF1) in translation termination; mutant form acts as a recessive omnipotent suppressor; methylated by Mtq2p-Trm112p in ternary complex eRF1-eRF3-GTP; mutation of methylation site confers resistance to zymocin; has a role in cytokinesis through interaction with Mlc1p	0.382106	0.959724	0.584928	-0.313837	0.707384	-0.291419	0.168541	blue	0.689923	-0.683168	-0.448943	-0.629367	-0.516523	-0.714646	-0.728408	-0.0242269	-0.345104	-0.470153	-0.721022	-0.12028	-0.542084	-0.715284	-0.57369	-0.612257	-0.26385	0.187502	0.0282376	-0.584467	0.444273	0.01303	0.0143285	0.143191	0.0283209	0.0855497	0.00900851	0.00721835	0.940426	0.271928	0.12298	0.00814227	0.709634	0.0686529	0.00891885	0.0511341	0.0343312	0.407301
852450	YBR153W	RIB7	Diaminohydroxyphoshoribosylaminopyrimidine deaminase; catalyzes the second step of the riboflavin biosynthesis pathway	0.429508	0.912586	0.633815	-0.215573	0.712078	-0.251346	0.0887744	blue	0.587687	-0.737854	-0.537742	-0.713732	-0.607026	-0.751971	-0.755233	-0.0668029	-0.445843	-0.550413	-0.784854	-0.233528	-0.62675	-0.761511	-0.639499	-0.671263	-0.356946	0.0753404	-0.114091	-0.604518	0.49687	0.0444852	0.00615419	0.0713453	0.0091381	0.0363379	0.00478923	0.00450944	0.836577	0.146313	0.063686	0.00249744	0.465092	0.0291868	0.00400585	0.0251425	0.0168462	0.254706
852451	YBR154C	RPB5	RNA polymerase subunit ABC27; common to RNA polymerases I, II, and III; contacts DNA and affects transactivation	0.435029	0.968051	0.53632	-0.484462	0.344667	-0.660409	0.0188195	blue	0.779804	-0.453613	-0.345025	-0.549108	-0.467808	-0.553631	-0.579231	0.236708	-0.136958	-0.322334	-0.61874	0.10529	-0.40366	-0.623981	-0.447469	-0.419588	-0.10008	0.360855	0.142714	-0.830575	0.186734	0.00277901	0.138569	0.272044	0.0644474	0.125117	0.0618353	0.048424	0.458859	0.671243	0.306869	0.0319557	0.74468	0.193165	0.0301238	0.14467	0.17451	0.756969
852452	YBR155W	CNS1	TPR-containing co-chaperone; binds both Hsp82p (Hsp90) and Ssa1p (Hsp70); stimulates ATPase activity of Ssa1p; ts mutants reduce Hsp82p function, overexpression suppresses phenotypes of HSP82 ts allele and cpr7 deletion; human homolog TTC4 complements yeast cns1 mutant	0.4106	0.968209	0.52903	-0.479547	0.500339	-0.509899	0.15982	blue	0.731395	-0.589552	-0.419172	-0.593689	-0.512701	-0.661908	-0.68799	0.0172719	-0.25392	-0.408865	-0.675482	-0.00980546	-0.493426	-0.690959	-0.523454	-0.522494	-0.210274	0.245598	0.068823	-0.726713	0.316979	0.00686798	0.0436481	0.174983	0.0418306	0.0882968	0.0190415	0.0133922	0.957512	0.425815	0.186939	0.0159195	0.975872	0.103063	0.0128388	0.0807156	0.081374	0.511847
852454	YBR157C	ICS2	Protein of unknown function; null mutation does not confer any obvious defects in growth, spore germination, viability, or carbohydrate utilization	0.271568	0.939499	0.545948	-0.506753	0.353161	-0.628673	0.178563	blue	0.87168	-0.292895	-0.0999785	-0.309221	-0.232251	-0.360077	-0.403368	0.338801	0.0892641	-0.101523	-0.398208	0.275876	-0.160483	-0.416213	-0.227361	-0.215239	0.164474	0.538862	0.382892	-0.733677	0.0254486	0.00022004	0.355541	0.757209	0.328067	0.467606	0.250262	0.193517	0.28136	0.782644	0.753561	0.199821	0.38543	0.618313	0.178365	0.477293	0.501695	0.609487
852456	YBR159W	IFA38	Microsomal beta-keto-reductase; contains oleate response element (ORE) sequence in the promoter region; mutants exhibit reduced VLCFA synthesis, accumulate high levels of dihydrosphingosine, phytosphingosine and medium-chain ceramides	-0.396021	-0.88821	-0.526357	0.467344	-0.106843	0.823702	0.151826	blue	-0.785734	0.222286	0.191619	0.411119	0.354549	0.330452	0.362604	-0.506729	-0.0631103	0.140741	0.459125	-0.27417	0.217705	0.45199	0.265027	0.201659	-0.101443	-0.511189	-0.254624	0.922164	0.0454097	0.0024507	0.487441	0.550773	0.184283	0.258139	0.294138	0.246708	0.0927089	0.845511	0.662631	0.133239	0.388496	0.496685	0.140164	0.405133	0.529673	0.753749
852457	YBR160W	CDC28	Cyclin-dependent kinase (CDK) catalytic subunit; master regulator of mitotic and meiotic cell cycles; alternately associates with G1, S, G2/M phase cyclins, which provide substrate specificity; regulates metabolism, basal transcription, chromosome dynamics, growth and morphogenesis; transcript induction in osmostress involves antisense RNA; human homologs CDK1, CDK2, CDK3 can complement yeast con…	0.343296	0.852519	0.76538	-0.0568134	0.756101	-0.12447	0.219874	blue	0.592781	-0.67863	-0.411987	-0.612366	-0.46821	-0.645762	-0.628852	0.0469075	-0.361464	-0.444233	-0.698632	-0.187665	-0.504935	-0.65317	-0.524637	-0.590378	-0.225864	0.175013	-0.006147	-0.439175	0.44417	0.0422249	0.0152529	0.183265	0.0342901	0.124749	0.023312	0.0284898	0.884902	0.248307	0.147952	0.0114869	0.559179	0.0940621	0.0212744	0.0799096	0.0432809	0.480277
852465	YBR167C	POP7	Subunit of RNase MRP, nuclear RNase P and telomerase; forms a soluble heterodimer with Pop6p that binds P3 domain of RNase MRP and RNase P RNAs; RNase MRP cleaves pre-rRNA, nuclear RNase P cleaves tRNA precursors to generate mature 5' ends and facilitates turnover of nuclear RNAs, while telomerase replenishes telomeric DNA	0.26765	0.933699	0.612985	-0.33561	0.617041	-0.363719	0.175137	blue	0.729754	-0.477547	-0.218358	-0.420535	-0.303525	-0.50328	-0.530724	0.170202	-0.135482	-0.191405	-0.519275	0.138503	-0.28316	-0.50813	-0.33548	-0.396867	0.0353074	0.414809	0.302115	-0.589743	0.187008	0.00705894	0.1164	0.495364	0.173438	0.337518	0.0953229	0.0758488	0.596907	0.674613	0.551229	0.083607	0.667721	0.372484	0.0916609	0.286404	0.201479	0.913255
852470	YBR172C	SMY2	GYF domain protein; involved in COPII vesicle formation; interacts with the Sec23p/Sec24p subcomplex; overexpression suppresses the temperature sensitivity of a myo2 mutant; similar to S. pombe Mpd2; SMY2 has a paralog, SYH1, that arose from the whole genome duplication	0.307451	0.952303	0.529303	-0.35884	0.712459	-0.293954	0.0972165	blue	0.647501	-0.685742	-0.456076	-0.603299	-0.528248	-0.704223	-0.720248	-0.0574824	-0.318362	-0.404969	-0.699756	-0.053027	-0.505593	-0.699119	-0.51782	-0.566756	-0.228073	0.229042	0.0704878	-0.591684	0.371938	0.0228214	0.013823	0.13617	0.0378175	0.0774831	0.0105704	0.00824399	0.859161	0.313208	0.191586	0.011298	0.869992	0.0935646	0.0114047	0.08463	0.0546736	0.475876
852478	YBR180W	DTR1	Putative dityrosine transporter of the major facilitator superfamily; member of the 12-spanner drug:H(+) antiporter DHA1 family; required for spore wall synthesis; sequence similarity to QDR1 and QDR3, and the triple mutant dtr1 qdr1 qdr3 exhibits reduced dityrosine fluorescence relative to the single mutants; expressed during sporulation	0.589454	0.870133	0.403565	-0.234456	0.461026	-0.443911	-0.119541	blue	0.526741	-0.608981	-0.553823	-0.663593	-0.64473	-0.699851	-0.773911	-0.0336956	-0.4294	-0.574619	-0.692735	-0.22254	-0.635198	-0.745155	-0.672485	-0.63585	-0.392775	-0.0294063	-0.163833	-0.72684	0.4985	0.0784895	0.0355782	0.061726	0.0186315	0.0236068	0.0112821	0.00313752	0.917203	0.163604	0.0506725	0.0125159	0.486932	0.0264582	0.00541615	0.0165738	0.0262558	0.206591
852494	YBR195C	MSI1	Subunit of chromatin assembly factor I (CAF-1); chromatin assembly by CAF-1 affects multiple processes including silencing at telomeres, mating type loci, and rDNA; maintenance of kinetochore structure; deactivation of DNA damage checkpoint after DNA repair; chromatin dynamics during transcription; and repression of divergent noncoding transcription; Msi1p localizes to nucleus and cytoplasm and i…	0.352082	0.960981	0.689602	-0.28335	0.605306	-0.39487	0.212015	blue	0.762699	-0.535662	-0.302712	-0.506096	-0.400883	-0.562962	-0.582198	0.168624	-0.152843	-0.309103	-0.594931	0.0227515	-0.368658	-0.592758	-0.427134	-0.451507	-0.0454484	0.344531	0.176972	-0.635805	0.268123	0.00391557	0.0726605	0.338878	0.0931847	0.196537	0.0566809	0.0470148	0.600362	0.635335	0.328261	0.0412956	0.944049	0.238316	0.042235	0.166083	0.140641	0.888462
852506	YBR207W	FTH1	Putative high affinity iron transporter; involved in transport of intravacuolar stores of iron; forms complex with Fet5p; expression is regulated by iron; proposed to play indirect role in endocytosis; protein abundance increases in response to DNA replication stress	-0.0372499	0.788371	0.477842	-0.392282	0.732146	-0.1094	0.373211	blue	0.743707	-0.422851	-0.0418777	-0.218136	-0.0864733	-0.372363	-0.384544	0.0722812	-0.0093152	-0.0767692	-0.355043	0.161567	-0.135669	-0.321405	-0.153799	-0.251533	0.117861	0.477861	0.403575	-0.287282	0.163557	0.00555691	0.170834	0.897182	0.495813	0.789302	0.233266	0.217113	0.823354	0.977079	0.812553	0.257429	0.61591	0.674186	0.308344	0.633196	0.430326	0.715258
852532	YBR231C	SWC5	Component of the SWR1 complex; complex exchanges histone variant H2AZ (Htz1p) for chromatin-bound histone H2A; protein abundance increases in response to DNA replication stress; relocalizes to the cytosol in response to hypoxia	-0.00342016	0.855961	0.4407	-0.563479	0.587053	-0.325235	0.28018	blue	0.857721	-0.34797	-0.0232098	-0.234579	-0.0978768	-0.348036	-0.35302	0.203382	0.0802619	-0.0488663	-0.369287	0.27056	-0.111762	-0.329697	-0.137553	-0.19891	0.158216	0.583107	0.450664	-0.4585	0.0632331	0.000359822	0.2677	0.942923	0.463028	0.762182	0.267603	0.260343	0.526087	0.804167	0.880125	0.237455	0.395022	0.729489	0.295308	0.669886	0.535415	0.623346
852541	YBR239C	ERT1	Transcriptional regulator; involved in regulation of gluconeogenesis and fermentable carbon utilization; GFP-fusion protein localizes to cytoplasm, nucleus; null mutation affects periodicity of transcriptional and metabolic oscillation; plays role in restricting Ty1 transposition; member of the zinc cluster family of proteins, similar to Rds2p	0.452272	0.936302	0.562197	-0.321416	0.380248	-0.59556	0.00684916	blue	0.620953	-0.469325	-0.383257	-0.509364	-0.509613	-0.560673	-0.605816	0.146711	-0.124923	-0.249505	-0.561864	0.122454	-0.346717	-0.622855	-0.420629	-0.406022	-0.02604	0.302472	0.157739	-0.800173	0.130482	0.0311726	0.123731	0.218787	0.090744	0.0905602	0.0579163	0.0368136	0.649116	0.69888	0.434177	0.0572711	0.704592	0.269543	0.0305107	0.173333	0.190324	0.935975
852549	YBR247C	ENP1	Protein associated with U3 and U14 snoRNAs; required for pre-rRNA processing and 40S ribosomal subunit synthesis; localized in the nucleus and concentrated in the nucleolus; human BYSL functionally complements the heat sensitivity of an enp1 ts mutant	0.532934	0.975033	0.557826	-0.398843	0.337135	-0.672226	-0.0194007	blue	0.716528	-0.492807	-0.422425	-0.600293	-0.550857	-0.60369	-0.645747	0.193627	-0.199326	-0.383416	-0.651439	0.036514	-0.463731	-0.683288	-0.519897	-0.478498	-0.15339	0.266182	0.0633199	-0.871208	0.239418	0.00874598	0.103563	0.171311	0.0390421	0.0634282	0.0376604	0.0233162	0.546525	0.534544	0.21858	0.0217385	0.910301	0.128889	0.0143046	0.0831721	0.115571	0.634111
852556	YBR254C	TRS20	Core component of transport protein particle (TRAPP) complexes I-III; TRAPPs are multimeric guanine nucleotide-exchange factors for GTPase Ypt1p, regulating ER-Golgi traffic (TRAPPI), intra-Golgi traffic (TRAPPII), endosome-Golgi traffic (TRAPPII and III) and autophagy (TRAPPIII); mutation leads to defects in endocytic recycling, block in sporulation/meiosis; mutations in human homolog TRAPPC2 ca…	-0.579324	-0.898435	-0.611645	0.357686	-0.109653	0.808601	-0.0330518	blue	-0.730913	0.295286	0.278396	0.48045	0.424498	0.432364	0.485974	-0.367748	0.0518665	0.262441	0.509417	-0.130317	0.319421	0.547307	0.407117	0.333343	-0.00419834	-0.330665	-0.138509	0.919105	-0.0925021	0.00692369	0.351442	0.380926	0.113881	0.168997	0.160396	0.109188	0.239567	0.872816	0.409902	0.0907049	0.68645	0.311511	0.0655083	0.189015	0.289676	0.989668
852560	YBR257W	POP4	Subunit of both RNase MRP and nuclear RNase P; RNase MRP cleaves pre-rRNA, while nuclear RNase P cleaves tRNA precursors to generate mature 5' ends and facilitates turnover of nuclear RNAs; binds to the RPR1 RNA subunit in RNase P	0.271413	0.873667	0.310943	-0.48573	0.528253	-0.407775	-0.22314	blue	0.52371	-0.635747	-0.52973	-0.639733	-0.604336	-0.692052	-0.693118	-0.0461763	-0.332993	-0.368582	-0.721724	0.0364976	-0.519702	-0.705062	-0.488689	-0.523074	-0.290345	0.238213	0.0288977	-0.675275	0.259781	0.0805405	0.0262876	0.0765027	0.0250721	0.0374015	0.0126394	0.0124471	0.886685	0.290215	0.238421	0.00805091	0.910341	0.0833086	0.0104378	0.10693	0.0809758	0.359939
852566	YBR262C	MIC12	Component of the MICOS complex; MICOS (formerly MINOS or MitOS) is a mitochondrial inner membrane complex that extends into the intermembrane space and has a role in the maintenance of crista junctions, inner membrane architecture, and formation of contact sites to the outer membrane; forms a subcomplex with Mic10p and Mic27p whose assembly and stability requires cardiolipin	0.165273	0.683122	0.624205	-0.0302769	0.608875	-0.0956051	0.132955	blue	0.495794	-0.556051	-0.369683	-0.491672	-0.437511	-0.512698	-0.452569	0.0875946	-0.117346	-0.310754	-0.569665	-0.107892	-0.336259	-0.542525	-0.35753	-0.384276	-0.113713	0.230814	-0.00750296	-0.34122	0.250451	0.101166	0.0604687	0.236913	0.104484	0.154921	0.0882989	0.139594	0.786625	0.716455	0.32555	0.0531685	0.738564	0.285217	0.0683833	0.253874	0.217461	0.724929
852569	YBR267W	REI1	Cytoplasmic pre-60S factor; required for the correct recycling of shuttling factors Alb1, Arx1 and Tif6 at the end of the ribosomal large subunit biogenesis; involved in bud growth in the mitotic signaling network	0.551757	0.968064	0.570577	-0.371756	0.29531	-0.704756	-0.0613716	blue	0.723568	-0.442608	-0.388332	-0.579411	-0.523174	-0.561179	-0.607686	0.270024	-0.172616	-0.355099	-0.624418	0.0640468	-0.432453	-0.651636	-0.497157	-0.450962	-0.113577	0.292657	0.0887185	-0.894316	0.208309	0.00781433	0.149618	0.212231	0.0483377	0.0809074	0.0576419	0.0360802	0.395996	0.591633	0.257349	0.0299744	0.843244	0.1603	0.0216852	0.100085	0.141181	0.725246
852573	YBR270C	BIT2	Subunit of TORC2 membrane-associated complex; involved in regulation of actin cytoskeletal dynamics during polarized growth and cell wall integrity; interacts with Slm1p and Slm2p, homologous PH domain-containing TORC2 substrates; BIT2 has a paralog, BIT61, that arose from the whole genome duplication	0.393557	0.939211	0.583817	-0.223162	0.722917	-0.260844	-0.0120569	blue	0.607326	-0.736377	-0.547106	-0.707897	-0.621621	-0.752809	-0.75354	-0.0109915	-0.403108	-0.523059	-0.788187	-0.178276	-0.606086	-0.769627	-0.615633	-0.64912	-0.335366	0.142573	-0.0679548	-0.601707	0.469647	0.0362204	0.00631231	0.0656275	0.00999854	0.0309391	0.0047161	0.00465308	0.972955	0.193832	0.0809858	0.00232387	0.579341	0.0367069	0.00341943	0.0330787	0.0223716	0.286578
852574	YBR271W	EFM2	S-adenosylmethionine-dependent methyltransferase; seven-beta-strand lysine methyltransferase which dimethylates translation elongation factor EF2 (Eft1p and Eft2p) at lysine 613 and methylates EF3 (Yef3p) at lysine 187; green fluorescent protein (GFP)-fusion protein localizes to the cytoplasm; involved in regulation of translational termination; predicted involvement in ribosome biogenesis	0.500757	0.968381	0.565754	-0.420489	0.310761	-0.692196	-0.0097751	blue	0.706377	-0.457517	-0.380878	-0.56093	-0.506878	-0.568517	-0.610252	0.217434	-0.168257	-0.305021	-0.617251	0.11759	-0.406946	-0.644761	-0.461039	-0.435995	-0.0877745	0.328413	0.139663	-0.869076	0.165064	0.0102322	0.13478	0.221902	0.057777	0.0925965	0.0537586	0.0350905	0.497236	0.601167	0.335022	0.0324905	0.715887	0.18922	0.0235978	0.13142	0.156521	0.786196
852594	YBR291C	CTP1	Mitochondrial inner membrane citrate transporter; member of the mitochondrial carrier family	0.361412	0.950787	0.595119	-0.364769	0.359133	-0.638254	-0.135517	blue	0.724022	-0.402135	-0.302282	-0.496123	-0.442345	-0.471485	-0.490075	0.371969	-0.0549373	-0.187408	-0.564465	0.21391	-0.293674	-0.556551	-0.334287	-0.326969	0.040424	0.477208	0.240768	-0.828662	0.0509109	0.007757	0.195013	0.3396	0.100905	0.149889	0.121777	0.105789	0.2338	0.865345	0.559727	0.0558795	0.504404	0.354204	0.0601886	0.288228	0.299563	0.900735
852598	YBR295W	PCA1	Cadmium transporting P-type ATPase; may also have a role in copper and iron homeostasis; stabilized by Cd binding, which prevents ubiquitination; S288C and other lab strains contain a G970R mutation which eliminates Cd transport function	0.100546	0.914771	0.475653	-0.471741	0.568535	-0.404051	0.0925691	blue	0.773736	-0.42552	-0.179487	-0.341646	-0.276956	-0.438222	-0.455057	0.204041	0.0269714	-0.0909691	-0.45839	0.257565	-0.186029	-0.449657	-0.211533	-0.258109	0.113291	0.545935	0.382047	-0.581241	0.0597543	0.00314868	0.167863	0.576725	0.27708	0.383496	0.154174	0.137159	0.524718	0.933689	0.778583	0.133942	0.418971	0.562672	0.142478	0.509264	0.417955	0.725915
852599	YBR296C	PHO89	Plasma membrane Na+/Pi cotransporter; active in early growth phase; similar to phosphate transporters of Neurospora crassa; transcription regulated by inorganic phosphate concentrations and Pho4p; mutations in related human transporter genes hPit1 and hPit2 are associated with hyperphosphatemia-induced calcification of vascular tissue and familial idiopathic basal ganglia calcification	0.0782492	0.90094	0.415975	-0.659198	0.381816	-0.583991	0.080003	blue	0.865691	-0.28657	-0.0707431	-0.274515	-0.184759	-0.32919	-0.349063	0.318259	0.125737	-0.0125555	-0.389841	0.376682	-0.111171	-0.36072	-0.125669	-0.145686	0.185572	0.649023	0.458184	-0.683714	-0.0627743	0.000273522	0.366502	0.827062	0.387874	0.565388	0.296097	0.266098	0.313373	0.696999	0.969108	0.210306	0.227459	0.730874	0.249355	0.697156	0.651429	0.563648
852608	YGL243W	TAD1	tRNA-specific adenosine deaminase; deaminates adenosine-37 to inosine in tRNA-Ala	0.300559	0.914489	0.69911	-0.23482	0.587272	-0.370617	0.00110756	blue	0.637627	-0.56416	-0.362414	-0.564762	-0.456827	-0.566297	-0.555973	0.215142	-0.230109	-0.268057	-0.653638	0.0751743	-0.389667	-0.606555	-0.395775	-0.453887	-0.0745077	0.389049	0.168723	-0.6291	0.200798	0.0257093	0.0560417	0.246974	0.0557222	0.135444	0.0549135	0.0605124	0.501893	0.471839	0.399581	0.0211503	0.816388	0.210527	0.0365222	0.202836	0.138301	0.817992
852616	YGL236C	MTO1	Mitochondrial protein; forms heterodimer complex with Mss1p that performs 5-carboxymethylaminomethyl modification of the wobble uridine base in mitochondrial tRNAs; required for respiration in paromomycin-resistant 15S rRNA mutants; human homolog MTO1 can complement yeast null mutant	0.260599	0.894933	0.52211	-0.267806	0.733791	-0.197315	0.165794	blue	0.555736	-0.664521	-0.416939	-0.52685	-0.463886	-0.675068	-0.693535	-0.099063	-0.293314	-0.306655	-0.630029	0.00758198	-0.422823	-0.648475	-0.449319	-0.534763	-0.152511	0.247876	0.155525	-0.465621	0.322302	0.0606453	0.0184082	0.177532	0.0784166	0.128745	0.0160087	0.0123723	0.759374	0.354821	0.332307	0.0281048	0.981343	0.170865	0.0225502	0.142816	0.0732339	0.636078
852617	YGL234W	ADE5,7	Enzyme of the 'de novo' purine nucleotide biosynthetic pathway; contains aminoimidazole ribotide synthetase and glycinamide ribotide synthetase activities	0.678604	0.665528	0.506266	0.117206	0.452887	-0.197241	0.160115	blue	0.343019	-0.631644	-0.558597	-0.621917	-0.637726	-0.669161	-0.736858	-0.1804	-0.52492	-0.723982	-0.6154	-0.510905	-0.693814	-0.72304	-0.74813	-0.683498	-0.519899	-0.331507	-0.403087	-0.447696	0.693799	0.275028	0.0275827	0.0590535	0.030836	0.0256791	0.0173223	0.00626044	0.574756	0.0797178	0.00776203	0.0331644	0.0896086	0.0123227	0.00788149	0.00513532	0.0142629	0.0831709
852646	YGL246C	RAI1	Nuclear protein with decapping endonuclease activity; targets mRNAs with unmethylated 7-methylguanosine cap structures and 5'-triphosphates; binds to and stabilizes the exoribonuclease Rat1p; required for pre-rRNA processing; relocalizes to the cytosol in response to hypoxia; homologous to human DOM3Z	0.307997	0.968393	0.470658	-0.556575	0.385426	-0.637	-0.0233911	blue	0.783653	-0.433049	-0.297425	-0.48213	-0.415144	-0.514853	-0.543484	0.232232	-0.0703268	-0.213764	-0.569801	0.21249	-0.322534	-0.566658	-0.349255	-0.346561	-0.0153862	0.462554	0.253941	-0.805133	0.0970611	0.0025623	0.15966	0.347798	0.11244	0.179597	0.0867427	0.0677999	0.467643	0.828066	0.504701	0.0530989	0.507306	0.306552	0.0547245	0.265817	0.269774	0.962147
852657	YGL215W	CLG1	Cyclin-like protein that interacts with Pho85p; has sequence similarity to G1 cyclins PCL1 and PCL2	0.44492	0.991432	0.629244	-0.349189	0.564019	-0.471255	0.136495	blue	0.737199	-0.598161	-0.413899	-0.601827	-0.516977	-0.652466	-0.684633	0.0859982	-0.257589	-0.417337	-0.677913	-0.0445509	-0.489827	-0.689857	-0.534683	-0.537053	-0.177798	0.245902	0.0672045	-0.729798	0.342457	0.00622388	0.0399274	0.181038	0.0384138	0.0852267	0.0214623	0.0140392	0.790437	0.418926	0.177075	0.015403	0.890653	0.105992	0.0130423	0.0732854	0.071779	0.580375
852661	YGL211W	NCS6	Protein required for uridine thiolation of Gln, Lys, and Glu tRNAs; required for the thiolation of uridine at the wobble position of Gln, Lys, and Glu tRNAs; has a role in urmylation and in invasive and pseudohyphal growth; inhibits replication of Brome mosaic virus in S. cerevisiae	0.420146	0.993989	0.584195	-0.412064	0.477445	-0.559115	0.0519423	blue	0.777602	-0.532985	-0.376811	-0.571719	-0.491945	-0.598748	-0.631778	0.184327	-0.189422	-0.365586	-0.649913	0.0371694	-0.444918	-0.654417	-0.480523	-0.470499	-0.131594	0.330285	0.120915	-0.77704	0.268605	0.00290911	0.0743773	0.227287	0.0521233	0.104262	0.0396824	0.0275395	0.566315	0.555438	0.242554	0.0221535	0.908697	0.147253	0.0209445	0.113818	0.122666	0.683517
852673	YGL201C	MCM6	Protein involved in DNA replication; component of the Mcm2-7 hexameric helicase complex that binds chromatin as a part of the pre-replicative complex; forms a subcomplex with Mcm4p and Mcm7p	0.0101269	0.817746	0.284275	-0.625145	0.639759	-0.231201	0.372805	blue	0.756123	-0.481885	-0.154235	-0.283841	-0.210029	-0.478991	-0.498087	-0.110474	-0.0591025	-0.19783	-0.414736	0.116187	-0.253043	-0.430893	-0.257004	-0.306384	-0.0465915	0.365696	0.284694	-0.372063	0.225467	0.0044353	0.112649	0.632222	0.371286	0.51235	0.115142	0.099352	0.732505	0.855228	0.53768	0.180068	0.719154	0.427471	0.161982	0.420021	0.332756	0.885672
852701	YGL174W	BUD13	Subunit of the RES complex; RES complex is required for nuclear pre-mRNA retention and splicing; involved in bud-site selection; diploid mutants display a unipolar budding pattern instead of the wild-type bipolar pattern due to a specific defect in MATa1 pre-mRNA splicing which leads to haploid gene expression in diploids	0.49304	0.955501	0.754517	-0.210649	0.589356	-0.397995	0.13487	blue	0.696354	-0.641518	-0.460894	-0.689029	-0.553001	-0.680395	-0.677587	0.131209	-0.338406	-0.493862	-0.757918	-0.146512	-0.556532	-0.728246	-0.595995	-0.606557	-0.248551	0.193333	-0.0330477	-0.689442	0.408234	0.0118766	0.0245414	0.131557	0.0131966	0.0621947	0.0148884	0.0154715	0.6844	0.281958	0.102712	0.00428849	0.649564	0.0601992	0.00723782	0.0408413	0.0365217	0.435995
852704	YGL171W	ROK1	RNA-dependent ATPase; involved in pre-rRNA processing at sites A0, A1, and A2, and in control of cell cycle progression; contains two upstream open reading frames (uORFs) in 5' untranslated region which regulate translation	0.503007	0.970307	0.516607	-0.443696	0.345638	-0.658707	0.00349814	blue	0.716694	-0.489973	-0.406341	-0.579978	-0.524154	-0.603855	-0.647783	0.161905	-0.19975	-0.361511	-0.638659	0.0634892	-0.450614	-0.670182	-0.503239	-0.473616	-0.14842	0.27997	0.0959634	-0.84531	0.231806	0.00872314	0.105872	0.189942	0.0480665	0.0802384	0.0375941	0.0227426	0.615163	0.533658	0.248241	0.0253956	0.844594	0.141526	0.0170898	0.0953545	0.119869	0.645266
852707	YGL169W	SUA5	Protein involved in threonylcarbamoyl adenosine biosynthesis; Sua5p and Qri7p are necessary and sufficient for RNA t6A modification in vitro; null mutant lacks N6-threonylcarbamoyl adenosine (t6A) modification in the anticodon loop of ANN-decoding tRNA; member of conserved YrdC/Sua5 family; binds single-stranded telomeric DNA and null mutant has abnormal telomere length	0.393365	0.990068	0.524227	-0.455593	0.452805	-0.58598	-0.0166441	blue	0.773741	-0.49333	-0.351645	-0.542681	-0.468683	-0.571607	-0.608058	0.208248	-0.156967	-0.316401	-0.620888	0.0973031	-0.405705	-0.624637	-0.443925	-0.43625	-0.0938928	0.36722	0.1668	-0.7981	0.215993	0.00314837	0.103141	0.262335	0.0682883	0.124317	0.05218	0.0359352	0.516015	0.626125	0.316364	0.0311956	0.76354	0.190704	0.0298999	0.148267	0.156251	0.77163
852713	YGL163C	RAD54	DNA-dependent ATPase that stimulates strand exchange; modifies the topology of double-stranded DNA; involved in the recombinational repair of double-strand breaks in DNA during vegetative growth and meiosis; member of the SWI/SNF family of DNA translocases; forms nuclear foci upon DNA replication stress	0.40347	0.917326	0.768944	-0.177522	0.538491	-0.409601	0.308895	blue	0.69809	-0.500457	-0.276828	-0.453712	-0.387238	-0.514552	-0.554489	0.152719	-0.137896	-0.277659	-0.525044	0.0113595	-0.331043	-0.558651	-0.400184	-0.413064	0.00358711	0.298009	0.169321	-0.623967	0.240071	0.0115786	0.0974991	0.383726	0.138472	0.213634	0.0869587	0.0613483	0.635614	0.669104	0.38224	0.0796334	0.97205	0.293222	0.0590237	0.197391	0.182008	0.991172
852714	YGL162W	SUT1	Zn(II)2Cys6 family transcription factor; positively regulates sterol uptake genes under anaerobic conditions; involved in hypoxic gene expression; represses filamentation-inducing genes during vegetative growth; positively regulates mating with SUT2 by repressing expression of genes that act as mating inhibitors; repressed by STE12; relocalizes from the nucleus to the cytoplasm upon DNA replicati…	0.386784	0.971668	0.480124	-0.491446	0.475915	-0.550624	-0.00199697	blue	0.763449	-0.518922	-0.372835	-0.564765	-0.48234	-0.598895	-0.629001	0.139184	-0.196769	-0.36756	-0.641305	0.0407298	-0.446983	-0.640032	-0.480519	-0.469072	-0.156616	0.30596	0.108008	-0.7807	0.265218	0.00385936	0.0838548	0.232627	0.0557208	0.112261	0.0396208	0.0284409	0.666172	0.539907	0.239825	0.0246044	0.899988	0.145161	0.0249827	0.113822	0.123962	0.626907
852719	YGL158W	RCK1	Protein kinase involved in oxidative stress response; promotes pseudohyphal growth via activation of Ubp3p phosphorylation; identified as suppressor of S. pombe cell cycle checkpoint mutations; RCK1 has a paralog, RCK2, that arose from the whole genome duplication	0.348128	0.967427	0.579304	-0.451422	0.374926	-0.642278	-0.0442583	blue	0.802085	-0.408972	-0.281576	-0.498313	-0.413233	-0.482234	-0.49948	0.345065	-0.0507172	-0.225055	-0.576369	0.184031	-0.314178	-0.556684	-0.352765	-0.339327	0.012155	0.474841	0.231685	-0.825202	0.0945327	0.00169725	0.186813	0.37528	0.0991744	0.181812	0.112351	0.0982602	0.271986	0.875615	0.481892	0.0498109	0.566948	0.319962	0.0601145	0.260711	0.280566	0.970093
852755	YGL122C	NAB2	Nuclear polyadenylated RNA-binding protein; required for nuclear mRNA export and poly(A) tail length control; stimulates RNA polymerase III transcription by enhancing TFIIIB binding to promoters; protects mRNA against decay by the nuclear exosome in a poly(A)-tail-dependent manner; involved in forming export-competent mRNPs in the nucleus; autoregulates mRNA levels; NLS binds Kap104p; protein abu…	0.554104	0.863413	0.601377	-0.0967182	0.682055	-0.216058	0.163321	blue	0.477338	-0.74088	-0.568065	-0.693128	-0.612589	-0.775276	-0.831509	-0.187882	-0.535836	-0.592066	-0.74356	-0.318488	-0.664528	-0.769921	-0.701832	-0.733566	-0.404387	-0.0808958	-0.166158	-0.562682	0.591463	0.116583	0.00583969	0.0539928	0.0124454	0.0342064	0.00305154	0.00080005	0.558717	0.0725496	0.0425372	0.00557132	0.313006	0.0184066	0.00339951	0.0109554	0.0066215	0.192287
852757	YGL120C	PRP43	RNA helicase in the DEAH-box family; functions in both RNA polymerase I and polymerase II transcript metabolism; catalyzes removal of U2, U5, and U6 snRNPs from the postsplicing lariat-intron ribonucleoprotein complex; required for efficient biogenesis of both small- and large-subunit rRNAs; acts with Sqs1p to promote 20S to 18S rRNA processing catalyzed by endonuclease Nob1p	0.434661	0.993224	0.595552	-0.409068	0.443833	-0.590041	0.0908712	blue	0.763372	-0.501531	-0.350454	-0.534673	-0.471484	-0.576417	-0.618555	0.179881	-0.157678	-0.319374	-0.608112	0.0792324	-0.402067	-0.63323	-0.453353	-0.442095	-0.0788238	0.339498	0.160216	-0.790998	0.221695	0.00386515	0.0966674	0.264066	0.0732916	0.121778	0.0497872	0.032022	0.575875	0.624544	0.311585	0.0359146	0.806637	0.195095	0.0270767	0.138824	0.150146	0.807618
852767	YGL111W	NSA1	Constituent of 66S pre-ribosomal particles; involved in 60S ribosomal subunit biogenesis	0.490194	0.988925	0.565295	-0.386672	0.437342	-0.591974	-0.0509958	blue	0.68903	-0.561213	-0.46552	-0.644218	-0.576839	-0.657368	-0.683803	0.151625	-0.252272	-0.390743	-0.707826	0.0286995	-0.493175	-0.717529	-0.536284	-0.526369	-0.18304	0.274734	0.0650348	-0.832051	0.262598	0.0131965	0.0576231	0.127225	0.023754	0.0495812	0.0201789	0.0142025	0.638063	0.428927	0.209159	0.0100094	0.92945	0.103266	0.0086087	0.0722653	0.0787396	0.569076
852779	YGL099W	LSG1	Putative GTPase involved in 60S ribosomal subunit biogenesis; required for the release of Nmd3p from 60S subunits in the cytoplasm	0.408327	0.986216	0.505353	-0.476879	0.449485	-0.582204	0.0431754	blue	0.746769	-0.518531	-0.373998	-0.545451	-0.484156	-0.601122	-0.64512	0.126521	-0.18791	-0.330702	-0.623494	0.0836294	-0.426522	-0.645302	-0.463673	-0.458312	-0.122592	0.325849	0.151912	-0.784559	0.236032	0.0052624	0.0841293	0.231057	0.0666139	0.110719	0.0387014	0.0234952	0.69519	0.558656	0.29375	0.0302906	0.7961	0.166757	0.023443	0.128943	0.134017	0.704274
852782	YGL097W	SRM1	Nucleotide exchange factor for Gsp1p; localizes to the nucleus, required for nucleocytoplasmic trafficking of macromolecules; suppressor of the pheromone response pathway; potentially phosphorylated by Cdc28p; human homolog of the RAN GEF, RCC1, can complement a temperature sensitive point mutant	0.542674	0.931646	0.703388	-0.0785484	0.632596	-0.317251	0.0840465	blue	0.524491	-0.713226	-0.56409	-0.7068	-0.636529	-0.757673	-0.779755	-0.00933307	-0.424941	-0.495273	-0.766329	-0.168211	-0.588996	-0.788803	-0.638779	-0.673056	-0.289027	0.0934974	-0.0579683	-0.628341	0.444874	0.0800089	0.00921053	0.0560788	0.0101669	0.026046	0.00430831	0.00278186	0.977035	0.168505	0.101582	0.00364925	0.601269	0.0438966	0.00229286	0.0253592	0.0164476	0.362223
852789	YGL091C	NBP35	Essential cytoplasmic iron-sulfur cluster binding protein; forms a complex with Cfd1p that is involved in iron-sulfur protein assembly in the cytosol; similar to P-loop NTPases	-0.0646208	0.808775	0.374512	-0.495655	0.735642	-0.146711	0.0739601	blue	0.66976	-0.53527	-0.223378	-0.387595	-0.261478	-0.493809	-0.473203	0.031982	-0.128398	-0.148072	-0.528196	0.156103	-0.269116	-0.447464	-0.227229	-0.334582	-0.0372443	0.473853	0.301459	-0.381904	0.16802	0.0171856	0.07291	0.485249	0.213177	0.411686	0.102755	0.120237	0.921402	0.690863	0.646048	0.0775177	0.628052	0.397649	0.144675	0.477555	0.287776	0.908513
852795	YGL085W	LCL3	Putative protein of unknown function; mutant has long chronological lifespan; has homology to Staphylococcus aureus nuclease; GFP-fusion protein localizes to mitochondria; is induced in response to the DNA-damaging agent MMS	-0.0240451	0.808488	0.30115	-0.555181	0.480452	-0.406744	-0.18391	blue	0.662216	-0.359567	-0.173446	-0.325555	-0.246167	-0.373464	-0.378251	0.243696	0.0169116	0.00979061	-0.444614	0.362508	-0.145405	-0.374718	-0.115191	-0.1896	0.116343	0.614888	0.41855	-0.580336	-0.0568292	0.018966	0.250982	0.589824	0.301781	0.440553	0.231777	0.225371	0.4453	0.958397	0.975909	0.147563	0.246843	0.652065	0.230089	0.721479	0.555058	0.718791
852800	YGL080W	MPC1	Highly conserved subunit of mitochondrial pyruvate carrier (MPC); MPC is a mitochondrial inner membrane complex that mediates pyruvate uptake and comprises Mpc1p and Mpc2p during fermentative growth, or Mcp1p and Mpc3p during respiratory growth; null mutant displays slow growth that is complemented by expression of human or mouse ortholog; mutation in human ortholog MPC1 is associated with lactic…	-0.458129	-0.894336	-0.528598	0.402122	-0.113276	0.814651	0.0604493	blue	-0.728453	0.206794	0.174985	0.353886	0.328752	0.335068	0.404709	-0.431992	-0.0641507	0.0900292	0.394052	-0.301729	0.173182	0.439605	0.261057	0.209911	-0.163441	-0.469058	-0.313771	0.905334	0.0539492	0.00721299	0.519017	0.586477	0.259094	0.296779	0.287033	0.1919	0.160796	0.842992	0.780821	0.204987	0.340527	0.5904	0.152728	0.412467	0.512592	0.611768
852802	YGL078C	DBP3	RNA-Dependent ATPase, member of DExD/H-box family; involved in cleavage of site A3 within the ITS1 spacer during rRNA processing; not essential for growth, but deletion causes severe slow-growth phenotype	0.530789	0.977558	0.578794	-0.373868	0.331258	-0.67983	-0.0469077	blue	0.712737	-0.475308	-0.406264	-0.588612	-0.536951	-0.583707	-0.627442	0.236596	-0.187154	-0.351998	-0.639935	0.0674157	-0.440331	-0.667379	-0.497177	-0.462297	-0.119744	0.298592	0.0956598	-0.87676	0.211506	0.00928081	0.118367	0.190034	0.0440686	0.0718434	0.0463096	0.0289561	0.459077	0.560269	0.261822	0.0250118	0.835095	0.151973	0.0177337	0.100069	0.130233	0.710878
852809	YGL071W	AFT1	Transcription factor involved in iron utilization and homeostasis; binds consensus site PyPuCACCCPu and activates transcription in response to changes in iron availability; in iron-replete conditions localization is regulated by Grx3p, Grx4p, and Fra2p, and promoter binding is negatively regulated via Grx3p-Grx4p binding; AFT1 has a paralog, AFT2, that arose from the whole genome duplication; rel…	0.422026	0.830913	0.637576	-0.151305	0.666834	-0.20344	0.34415	blue	0.657525	-0.604217	-0.34585	-0.519228	-0.429663	-0.590517	-0.637258	-0.0544814	-0.33485	-0.5334	-0.578674	-0.29808	-0.523592	-0.602442	-0.565306	-0.557912	-0.269986	0.015813	-0.0939614	-0.488109	0.540936	0.0201389	0.0374493	0.270824	0.08364	0.163318	0.0432192	0.025822	0.866454	0.287366	0.0741097	0.0486919	0.346686	0.0806217	0.0381639	0.0554348	0.0594317	0.396065
852810	YGL070C	RPB9	RNA polymerase II subunit B12.6; contacts DNA; mutations affect transcription start site selection and fidelity of transcription	0.217772	0.892914	0.394775	-0.605746	0.201215	-0.739542	-0.0920122	blue	0.767818	-0.247354	-0.159203	-0.330528	-0.29037	-0.347278	-0.373793	0.377329	0.121247	-0.00717559	-0.415447	0.419499	-0.127573	-0.418181	-0.16312	-0.153244	0.176008	0.617093	0.414082	-0.812644	-0.133307	0.00354409	0.43828	0.621153	0.29402	0.359896	0.268717	0.231333	0.226597	0.707391	0.982343	0.179247	0.174611	0.692764	0.176111	0.612477	0.634437	0.584255
852816	YGL064C	MRH4	Mitochondrial ATP-dependent RNA helicase of the DEAD-box family; required for assembly of the large subunit of mitochondrial ribosomes; binds to the large subunit rRNA, 21S_rRNA; localizes to the matrix face of the mitochondrial inner membrane and associates with the large subunit precursor and with mature ribosomes	0.329946	0.961834	0.572491	-0.428033	0.612064	-0.392905	0.258812	blue	0.795576	-0.587962	-0.342584	-0.533468	-0.436962	-0.61781	-0.636983	0.0405032	-0.203847	-0.405175	-0.628631	-0.046362	-0.451839	-0.636022	-0.484975	-0.490878	-0.169475	0.270795	0.0958586	-0.62084	0.355785	0.00197201	0.0443611	0.275677	0.0740657	0.155499	0.0322891	0.0259064	0.900542	0.52512	0.19134	0.0285624	0.886232	0.140313	0.0262024	0.110027	0.105131	0.598496
852817	YGL063W	PUS2	Mitochondrial tRNA:pseudouridine synthase; acts at positions 27 and 28, but not at position 72; efficiently and rapidly targeted to mitochondria, specifically dedicated to mitochondrial tRNA modification; mutation also affects pseudouridylation of some nuclear-encoded mRNAs; PUS2 has a paralog, PUS1, that arose from the whole genome duplication	0.579066	0.668023	0.364823	-0.207101	0.278704	-0.376781	0.278404	blue	0.382577	-0.572745	-0.536633	-0.567228	-0.588845	-0.666078	-0.727552	-0.272382	-0.387125	-0.567411	-0.58712	-0.293224	-0.59263	-0.699748	-0.636786	-0.579476	-0.429332	-0.184202	-0.253537	-0.517495	0.492163	0.219675	0.0516068	0.0720447	0.0544275	0.0439642	0.0180385	0.00732121	0.39172	0.21378	0.0543321	0.0447419	0.354975	0.0422909	0.0112994	0.0259668	0.0483067	0.163678
852818	YGL062W	PYC1	Pyruvate carboxylase isoform; cytoplasmic enzyme that converts pyruvate to oxaloacetate; differentially regulated than isoform Pyc2p; mutations in the human homolog are associated with lactic acidosis; PYC1 has a paralog, PYC2, that arose from the whole genome duplication	0.65008	0.893206	0.573576	-0.239946	0.366168	-0.561494	-0.152893	blue	0.520478	-0.633517	-0.641365	-0.805519	-0.738572	-0.751025	-0.762411	0.0587032	-0.427775	-0.579253	-0.827915	-0.194656	-0.667103	-0.827308	-0.706111	-0.665133	-0.396683	0.0262824	-0.21718	-0.860617	0.400189	0.0827676	0.0269858	0.0245867	0.00156468	0.00607839	0.00487281	0.00393734	0.856197	0.165379	0.0484132	0.000883412	0.544355	0.0177981	0.000898136	0.0102735	0.0182623	0.201707
852825	YGL055W	OLE1	Delta(9) fatty acid desaturase; required for monounsaturated fatty acid synthesis and for normal distribution of mitochondria	0.426612	0.777515	0.61142	-0.264475	0.202856	-0.57353	0.0792536	blue	0.604095	-0.352293	-0.290434	-0.482677	-0.390104	-0.443547	-0.433002	0.29816	-0.0923846	-0.228656	-0.533817	0.118251	-0.302302	-0.528206	-0.358146	-0.342645	-0.0315882	0.338177	0.129931	-0.675558	0.0897468	0.0374981	0.261394	0.359785	0.111974	0.209971	0.148654	0.159711	0.346551	0.775215	0.474719	0.0738407	0.714349	0.339566	0.0775111	0.252998	0.275585	0.922367
852826	YGL054C	ERV14	COPII-coated vesicle protein; involved in vesicle formation and incorporation of specific secretory cargo; required for the delivery of bud-site selection protein Axl2p and Nha1p antiporter to cell surface; related to Drosophila cornichon; ERV14 has a paralog, ERV15, that arose from the whole genome duplication	0.265921	0.604158	0.208681	-0.191522	0.628711	0.0182483	0.297874	blue	0.481487	-0.540506	-0.319247	-0.391813	-0.308112	-0.557599	-0.613973	-0.249328	-0.3367	-0.486585	-0.466167	-0.297588	-0.471898	-0.501422	-0.502768	-0.529339	-0.351119	-0.077155	-0.0834269	-0.180137	0.591037	0.11299	0.0696234	0.311789	0.207805	0.329896	0.0596054	0.0336906	0.434514	0.284546	0.108677	0.126626	0.347522	0.121405	0.0967516	0.0957154	0.0767605	0.263098
852832	YGL050W	TYW3	tRNA methyltransferase required for synthesis of wybutosine; a modified guanosine found at the 3'-position adjacent to the anticodon of phenylalanine tRNA which supports reading frame maintenance by stabilizing codon-anticodon interactions	0.628289	0.839746	0.64401	0.0400338	0.715784	-0.144776	-0.00811158	blue	0.394883	-0.852252	-0.728427	-0.86778	-0.77175	-0.878285	-0.890299	-0.171707	-0.685541	-0.763009	-0.903971	-0.479172	-0.828784	-0.896771	-0.842253	-0.865018	-0.596431	-0.19607	-0.370709	-0.549073	0.720584	0.203948	0.00043034	0.00721619	0.000253835	0.00327745	0.000170912	0.000103799	0.593615	0.013862	0.00389224	5.46e-05	0.114985	0.000862658	7.75e-05	0.000586572	0.000280113	0.0406562
852850	YGL033W	HOP2	Meiosis-specific protein that localizes to chromosomes; prevents synapsis between nonhomologous chromosomes and ensures synapsis between homologs; complexes with Mnd1p to promote homolog pairing and meiotic double-strand break repair; heterodimer of Hop2p-Mnd1p stimulates the Dmc1p-mediated strand invasion	-0.503444	-0.806822	-0.645494	0.0380205	-0.700463	0.129169	-0.0482136	blue	-0.407241	0.756338	0.576807	0.754464	0.588984	0.774039	0.782385	0.100836	0.63104	0.569414	0.817314	0.289319	0.686693	0.762775	0.684692	0.770867	0.443339	0.0202878	0.153224	0.481812	-0.575832	0.188867	0.00441751	0.0495967	0.00457421	0.0439018	0.0031294	0.00263225	0.755183	0.027777	0.0532969	0.00116884	0.361716	0.0136396	0.00390988	0.0140277	0.00333595	0.148867
852863	YGL021W	ALK1	Protein kinase; along with its paralog, ALK2, required for proper spindle positioning and nuclear segregation following mitotic arrest, proper organization of cell polarity factors in mitosis, proper localization of formins and polarity factors, and survival in cells that activate spindle assembly checkpoint; phosphorylated in response to DNA damage; ALK1 has a paralog, ALK2, that arose from the …	-0.263723	-0.697195	-0.744424	0.287417	-0.272218	0.457589	-0.30947	blue	-0.719191	0.239224	0.0533693	0.346551	0.13802	0.265947	0.237062	-0.384899	-0.00366862	0.129843	0.414168	-0.117264	0.167184	0.321115	0.211386	0.221905	-0.113761	-0.430065	-0.219966	0.577008	-0.0386478	0.0083844	0.453955	0.869159	0.269789	0.668822	0.403443	0.458168	0.216652	0.990972	0.687539	0.180726	0.716647	0.603522	0.308806	0.509565	0.488208	0.724816
852868	YGL016W	KAP122	Karyopherin beta; responsible for import of the Toa1p-Toa2p complex into the nucleus; binds to nucleoporins Nup1p and Nup2p; may play a role in regulation of pleiotropic drug resistance	0.428544	0.875622	0.573677	-0.142223	0.737427	-0.161611	0.211098	blue	0.528553	-0.757511	-0.553101	-0.660244	-0.617888	-0.775732	-0.782074	-0.187218	-0.407557	-0.562675	-0.728675	-0.271736	-0.603437	-0.775438	-0.650309	-0.67117	-0.363598	-0.00765246	-0.136486	-0.47971	0.534545	0.0772808	0.00432145	0.0621375	0.0194528	0.0322611	0.00302321	0.0026496	0.560133	0.188491	0.0568348	0.00718652	0.392889	0.0377619	0.00304145	0.0220453	0.016867	0.245318
852870	YGL014W	PUF4	Member of the PUF protein family; PUF family is defined by the presence of Pumilio homology domains that confer RNA binding activity; preferentially binds mRNAs encoding nucleolar ribosomal RNA-processing factors	0.438307	0.968966	0.558195	-0.334523	0.584336	-0.42908	0.126012	blue	0.671639	-0.623934	-0.442702	-0.58453	-0.536671	-0.672958	-0.726342	-0.00890302	-0.293951	-0.422521	-0.658594	-0.0631272	-0.504694	-0.696898	-0.542563	-0.550907	-0.207402	0.190141	0.0529756	-0.690415	0.372176	0.016762	0.0301397	0.149521	0.0459281	0.0720203	0.0164692	0.0074685	0.978093	0.353728	0.171204	0.0198672	0.84547	0.0942448	0.0117827	0.0683604	0.0633994	0.517761
852875	YGL009C	LEU1	Isopropylmalate isomerase; catalyzes the second step in the leucine biosynthesis pathway	0.282556	0.823682	0.474858	-0.335078	0.667027	-0.21721	0.045418	blue	0.645246	-0.574584	-0.375744	-0.594197	-0.408389	-0.619977	-0.60348	0.0362809	-0.298765	-0.415032	-0.680072	-0.118973	-0.473942	-0.59754	-0.505625	-0.554219	-0.236588	0.194963	0.0149041	-0.540404	0.385077	0.0234592	0.0506899	0.228712	0.0416112	0.187503	0.0315163	0.0377445	0.910871	0.345527	0.179725	0.0149546	0.71267	0.119578	0.0401881	0.0935399	0.0615012	0.459093
852879	YGL005C	COG7	Component of the conserved oligomeric Golgi complex; a cytosolic tethering complex (Cog1p through Cog8p) that functions in protein trafficking to mediate fusion of transport vesicles to Golgi compartments	-0.523454	-0.914134	-0.594367	0.376821	-0.219021	0.721398	-0.0989059	blue	-0.812862	0.346414	0.270666	0.47773	0.424511	0.446909	0.496871	-0.326989	0.0512263	0.352134	0.517366	-0.0270924	0.364212	0.555644	0.438373	0.348444	0.0585697	-0.292771	-0.0772713	0.853535	-0.202039	0.0013079	0.26999	0.39483	0.11624	0.168983	0.145234	0.100311	0.299532	0.874375	0.261626	0.0849515	0.933392	0.244463	0.0606966	0.154016	0.267004	0.856521
852884	YGR001C	EFM5	S-adenosylmethionine-dependent lysine methyltransferase; involved in the trimethylation of eEF1A (Tef1p/Tef2p) at lysine 79; green fluorescent protein (GFP)-fusion protein localizes to the cytoplasm; required for replication of Brome mosaic virus in budding yeast; expresses a circular RNA; originally misclassified as a N-6-adenine specific DNA methyltransferase based on sequence similarity; both …	0.408268	0.977948	0.589624	-0.457356	0.413542	-0.605136	0.118031	blue	0.828313	-0.422683	-0.258299	-0.488881	-0.381006	-0.510368	-0.538225	0.26194	-0.0979455	-0.284436	-0.564108	0.115477	-0.345265	-0.566516	-0.412084	-0.396783	-0.0265679	0.388002	0.205364	-0.786664	0.18419	0.00087386	0.171022	0.4176	0.106771	0.221733	0.0900031	0.0710426	0.410829	0.762019	0.37024	0.0560693	0.72081	0.271689	0.0547989	0.183152	0.201583	0.934679
852887	YGR004W	PEX31	Peroxisomal integral membrane protein; involved in negative regulation of peroxisome size; partially functionally redundant with Pex30p and Pex32p; probably acts at a step downstream of steps mediated by Pex28p and Pex29p; PEX31 has a paralog, PEX30, that arose from the whole genome duplication	0.170761	0.909576	0.509553	-0.378587	0.757442	-0.203084	0.181155	blue	0.701664	-0.624488	-0.33301	-0.500104	-0.382053	-0.617876	-0.622982	-0.00580207	-0.226698	-0.308513	-0.621289	0.0136122	-0.399498	-0.590107	-0.406699	-0.484343	-0.132499	0.336456	0.187518	-0.467011	0.325439	0.0109829	0.0299504	0.290189	0.0977735	0.220359	0.0322655	0.0304668	0.985722	0.478613	0.329235	0.0310551	0.966509	0.198233	0.0434012	0.189514	0.11056	0.681441
852905	YGR023W	MTL1	Putative plasma membrane sensor; involved in cell integrity signaling and stress response during glucose starvation and oxidative stress; has structural and functional similarity to Mid2p; MTL1 has a paralog, MID2, that arose from the whole genome duplication	-0.0904685	0.831941	0.342966	-0.623321	0.509344	-0.395657	0.113338	blue	0.799628	-0.291185	-0.0121962	-0.175424	-0.109756	-0.287796	-0.297053	0.231498	0.170762	0.0698818	-0.306539	0.402216	-0.0258197	-0.282503	-0.0325171	-0.087564	0.243412	0.664734	0.519229	-0.509954	-0.0911176	0.00179727	0.358488	0.969992	0.585522	0.734188	0.364364	0.348431	0.469091	0.595681	0.82914	0.332499	0.194914	0.936516	0.373642	0.92009	0.786698	0.445848
852918	YGR030C	POP6	Subunit of RNase MRP, nuclear RNase P and telomerase; forms a soluble heterodimer with Pop7p that binds P3 domain of RNase MRP and RNase P RNAs; RNase MRP cleaves pre-rRNA, nuclear RNase P cleaves tRNA precursors to generate mature 5' ends and facilitates turnover of nuclear RNAs, while telomerase replenishes telomeric DNA; relocalizes to the cytosol in response to hypoxia	0.654072	0.831039	0.366942	-0.211622	0.380984	-0.468312	-0.265048	blue	0.47232	-0.613492	-0.649205	-0.779686	-0.723062	-0.755663	-0.783714	0.0162803	-0.465881	-0.639513	-0.796172	-0.260285	-0.697478	-0.814525	-0.748401	-0.700618	-0.483423	-0.070602	-0.267569	-0.760516	0.505522	0.121027	0.0338692	0.0223482	0.00278587	0.00787873	0.0044735	0.00255899	0.959949	0.126891	0.0251382	0.00194554	0.413901	0.0116831	0.00125454	0.00511031	0.0111548	0.111339
852940	YGR049W	SCM4	Mitochondrial outer membrane protein of unknown function; predicted to have 4 transmembrane segments; import is mediated by Tom70p and Mim1p; interacts genetically with a cdc4 mutation; SCM4 has a paralog, ATG33, that arose from the whole genome duplication	0.497197	0.832157	0.834867	0.0517335	0.414237	-0.431858	-0.0137407	blue	0.473483	-0.495808	-0.411187	-0.576428	-0.520048	-0.530775	-0.531241	0.280827	-0.213238	-0.260435	-0.614936	0.02438	-0.362379	-0.615783	-0.425934	-0.448484	-0.0278764	0.273011	0.0777818	-0.676544	0.153819	0.119987	0.101156	0.184202	0.0497818	0.0830672	0.0758155	0.075511	0.376604	0.505776	0.413622	0.0333346	0.94005	0.247023	0.0330239	0.167406	0.143651	0.931469
852956	YGR065C	VHT1	High-affinity plasma membrane H+-biotin (vitamin H) symporter; mutation results in fatty acid auxotrophy; 12 transmembrane domain containing major facilitator subfamily member; mRNA levels negatively regulated by iron deprivation and biotin	-0.00423169	0.85959	0.295543	-0.71926	0.40271	-0.52289	0.129378	blue	0.801895	-0.283378	-0.049269	-0.201959	-0.141678	-0.325543	-0.356877	0.189621	0.140433	0.0571546	-0.327658	0.433274	-0.0605597	-0.324058	-0.0716348	-0.115189	0.210845	0.644603	0.520131	-0.598566	-0.097559	0.00170483	0.3721	0.879144	0.529048	0.660503	0.301801	0.254805	0.555015	0.663332	0.859957	0.298484	0.159419	0.851693	0.30414	0.824912	0.721482	0.510676
852960	YGR068C	ART5	Protein proposed to regulate endocytosis of plasma membrane proteins; regulates by recruiting the ubiquitin ligase Rsp5p to its target in the plasma membrane; SWAT-GFP and mCherry fusion proteins localize to the cytosol	0.311199	0.965477	0.50515	-0.450916	0.594971	-0.419263	0.183447	blue	0.783062	-0.557869	-0.329023	-0.496729	-0.429153	-0.595586	-0.630963	0.0500946	-0.170642	-0.359047	-0.590484	0.00757992	-0.415523	-0.613188	-0.451172	-0.455763	-0.131122	0.296991	0.140646	-0.641934	0.313778	0.00259475	0.0594554	0.296357	0.100424	0.163873	0.0410156	0.0278019	0.877132	0.595943	0.251718	0.0432339	0.981348	0.179159	0.0339825	0.140973	0.136474	0.684601
852963	YGR072W	UPF3	Component of the nonsense-mediated mRNA decay (NMD) pathway; along with Nam7p and Nmd2p; involved in decay of mRNA containing nonsense codons; involved in telomere maintenance	0.397229	0.978628	0.577609	-0.365468	0.616273	-0.412809	0.0157109	blue	0.687882	-0.644854	-0.467186	-0.657924	-0.554365	-0.696567	-0.70416	0.0644903	-0.316122	-0.430064	-0.741013	-0.0445457	-0.527705	-0.720726	-0.55145	-0.577735	-0.233562	0.248747	0.0447746	-0.706319	0.350176	0.0134127	0.0235713	0.125688	0.0200372	0.0614183	0.0118397	0.0105805	0.84217	0.316814	0.162881	0.00582606	0.890665	0.0778449	0.0081811	0.0630854	0.0491454	0.465026
852972	YGR081C	SLX9	Protein required for pre-rRNA processing; associated with the 90S pre-ribosome and 43S small ribosomal subunit precursor; interacts with U3 snoRNA; deletion mutant has synthetic fitness defect with an sgs1 deletion mutant	0.579986	0.945474	0.56933	-0.358829	0.243071	-0.732602	-0.116261	blue	0.672895	-0.456377	-0.440601	-0.622142	-0.580838	-0.57956	-0.616308	0.259742	-0.20289	-0.383152	-0.656792	0.0421163	-0.46823	-0.683634	-0.522163	-0.464832	-0.159055	0.256027	0.0266643	-0.922204	0.203359	0.0164832	0.135879	0.151692	0.0307578	0.0476573	0.0482661	0.0328326	0.41491	0.527109	0.218923	0.0203269	0.896599	0.12473	0.0142361	0.0816015	0.127863	0.621482
852976	YGR085C	RPL11B	Ribosomal 60S subunit protein L11B; expressed at half the level of Rpl11Ap; involved in ribosomal assembly; depletion causes degradation of 60S proteins and RNA; homologous to mammalian ribosomal protein L11 and bacterial L5; RPL11B has a paralog, RPL11A, that arose from the whole genome duplication	0.917315	0.716339	0.655785	0.122999	0.218985	-0.481327	-0.0878634	blue	0.294969	-0.560363	-0.661135	-0.820335	-0.727654	-0.721252	-0.752454	0.0490807	-0.573014	-0.678501	-0.782788	-0.391157	-0.720433	-0.811251	-0.822363	-0.764823	-0.482226	-0.255424	-0.399352	-0.767249	0.529558	0.351986	0.058085	0.0192317	0.00108115	0.00730896	0.00811225	0.00474699	0.879603	0.0514718	0.01528	0.00260988	0.208634	0.00821956	0.00136122	0.0010252	0.003758	0.112358
852978	YGR087C	PDC6	Minor isoform of pyruvate decarboxylase; decarboxylates pyruvate to acetaldehyde, involved in amino acid catabolism; transcription is glucose- and ethanol-dependent, and is strongly induced during sulfur limitation	0.355641	0.619708	0.605407	-0.148101	0.316047	-0.325468	0.0375095	blue	0.702604	-0.278366	-0.162038	-0.483724	-0.25378	-0.31751	-0.257296	0.437931	-0.123285	-0.427826	-0.517572	-0.19281	-0.363856	-0.397233	-0.412393	-0.357983	-0.16467	0.187882	-0.105524	-0.525691	0.311334	0.01083	0.380978	0.614868	0.111084	0.426079	0.314576	0.419475	0.154479	0.702668	0.165323	0.0848054	0.548253	0.244959	0.201025	0.182791	0.253229	0.609057
852982	YGR090W	UTP22	Component of the small-subunit processome; required for nuclear export of tRNAs; may facilitate binding of Utp8p to aminoacylated tRNAs and their delivery to Los1p for export; conserved from yeast to mammals	0.466874	0.960782	0.598	-0.294915	0.642381	-0.357641	0.195899	blue	0.667945	-0.662191	-0.453459	-0.619146	-0.533294	-0.707017	-0.750354	-0.048139	-0.364061	-0.486366	-0.693185	-0.14211	-0.554882	-0.718411	-0.597949	-0.616269	-0.266596	0.126896	0.00106325	-0.641936	0.45463	0.0176024	0.0189721	0.13872	0.0318109	0.0741778	0.0101333	0.0049327	0.881898	0.244673	0.108861	0.0124351	0.659523	0.0611258	0.00848916	0.0400161	0.0328466	0.402252
852985	YGR093W	DRN1	Splicing factor that modulates turnover of branched RNAs by Dbr1p; interacts with spliceosomal components and branched RNA splicing products; enhances Dbr1p debranching in vitro; conserved protein with domain organization identical from yeast to human; N-terminal homology to Dbr1p N-terminus, but Dbr1p catalytic residues not conserved; relocalizes to the cytosol in response to hypoxia	0.535386	0.983215	0.622962	-0.280278	0.455534	-0.562384	-0.0396794	blue	0.636167	-0.595621	-0.495313	-0.65263	-0.613024	-0.668779	-0.712589	0.127474	-0.307299	-0.419741	-0.707719	-0.0214764	-0.525695	-0.737294	-0.560995	-0.551983	-0.207292	0.220789	0.0278047	-0.811816	0.307748	0.0261577	0.0410005	0.10155	0.0214185	0.0340438	0.0174099	0.00930209	0.692993	0.33124	0.174337	0.0100257	0.94718	0.0791932	0.00621378	0.0577417	0.0627781	0.517988
852987	YGR095C	RRP46	Exosome non-catalytic core component; involved in 3'-5' RNA processing and degradation in both the nucleus and the cytoplasm; has similarity to E. coli RNase PH and to human hRrp46p (EXOSC5)	0.38025	0.982625	0.510316	-0.489537	0.510736	-0.516831	0.103776	blue	0.769728	-0.543471	-0.364646	-0.555109	-0.462665	-0.618906	-0.647328	0.0966629	-0.206853	-0.359264	-0.641647	0.0474657	-0.442595	-0.647875	-0.480441	-0.4854	-0.15018	0.312188	0.137939	-0.731805	0.279107	0.00341256	0.0678077	0.243858	0.0609981	0.129888	0.0318967	0.0228698	0.765057	0.518894	0.251412	0.0245035	0.88354	0.149632	0.0227171	0.113888	0.10967	0.641307
852988	YGR096W	TPC1	Mitochondrial membrane transporter; mediates uptake of the essential cofactor thiamine pyrophosphate (ThPP) into mitochondria; expression appears to be regulated by carbon source; member of the mitochondrial carrier family	0.379219	0.580131	0.469407	-0.1612	0.511651	-0.0688224	0.362121	blue	0.27639	-0.636423	-0.513474	-0.622071	-0.509513	-0.709053	-0.636935	-0.33934	-0.411373	-0.482603	-0.667462	-0.26946	-0.523939	-0.673793	-0.590138	-0.629735	-0.38814	-0.139199	-0.224691	-0.313563	0.407598	0.38451	0.0260785	0.0877362	0.0307823	0.0906337	0.00982344	0.025921	0.280547	0.183984	0.112037	0.0177143	0.397022	0.0803845	0.016286	0.0433871	0.0282005	0.212478
852994	YGR102C	GTF1	Subunit of the trimeric GatFAB AmidoTransferase(AdT) complex; involved in the formation of Q-tRNAQ; transposon insertion mutant is salt sensitive and null mutant has growth defects; non-tagged protein is detected in purified mitochondria	0.373723	0.891824	0.675015	-0.0848319	0.706868	-0.220465	-0.0319055	blue	0.560106	-0.690582	-0.498366	-0.666583	-0.573671	-0.680525	-0.674703	0.0901665	-0.371775	-0.450841	-0.743825	-0.14342	-0.540265	-0.709902	-0.54753	-0.597305	-0.255849	0.19379	-0.0225469	-0.550851	0.411234	0.0582253	0.012908	0.0991327	0.0179197	0.0511434	0.0148617	0.0160877	0.780494	0.234062	0.141301	0.0055453	0.656555	0.069772	0.00969643	0.0653758	0.0402867	0.422186
852995	YGR103W	NOP7	Component of several different pre-ribosomal particles; forms a complex with Ytm1p and Erb1p that is required for maturation of the large ribosomal subunit; required for exit from G<sub>0</sub> and the initiation of cell proliferation	0.541303	0.954762	0.54106	-0.402871	0.261708	-0.72443	-0.086781	blue	0.687498	-0.450245	-0.416298	-0.592489	-0.549364	-0.575193	-0.614239	0.24079	-0.178256	-0.343417	-0.637003	0.0871358	-0.436706	-0.666595	-0.492395	-0.447393	-0.126964	0.292775	0.0816898	-0.903037	0.17824	0.0134857	0.141893	0.178267	0.0423522	0.0642971	0.050389	0.0335921	0.450916	0.579386	0.274434	0.0259003	0.78772	0.155769	0.017917	0.103897	0.144747	0.694169
853003	YGR109C	CLB6	B-type cyclin involved in DNA replication during S phase; activates Cdc28p to promote initiation of DNA synthesis; functions in formation of mitotic spindles along with Clb3p and Clb4p; most abundant during late G1; CLB6 has a paralog, CLB5, that arose from the whole genome duplication	0.574673	0.843469	0.869064	-0.0933144	0.379979	-0.476426	0.358772	blue	0.736948	-0.425198	-0.257405	-0.518452	-0.376505	-0.466755	-0.490474	0.27338	-0.190922	-0.432451	-0.553475	-0.166211	-0.416472	-0.551599	-0.503271	-0.457568	-0.102498	0.161884	-0.0204548	-0.675861	0.347219	0.00625084	0.168221	0.419272	0.0841849	0.227696	0.126084	0.105462	0.389918	0.552253	0.160302	0.0619244	0.605663	0.178067	0.0629995	0.0953298	0.134731	0.75126
853023	YGR123C	PPT1	Protein serine/threonine phosphatase; regulates Hsp90 chaperone by affecting its ATPase and cochaperone binding activities; has similarity to human phosphatase PP5; present in both the nucleus and cytoplasm; expressed during logarithmic growth	0.359637	0.98571	0.5222	-0.492287	0.451757	-0.578338	0.0885342	blue	0.795673	-0.472674	-0.305718	-0.493653	-0.41836	-0.551394	-0.586583	0.182335	-0.110583	-0.274282	-0.57971	0.134024	-0.358333	-0.59444	-0.406255	-0.403771	-0.048158	0.393991	0.217714	-0.762019	0.185584	0.00196768	0.120709	0.333862	0.102881	0.175907	0.0631179	0.0449863	0.57059	0.732252	0.388294	0.0481942	0.677947	0.252731	0.0415069	0.190045	0.19303	0.881852
853029	YGR128C	UTP8	Nucleolar protein required for export of tRNAs from the nucleus; also copurifies with the small subunit (SSU) processome containing the U3 snoRNA that is involved in processing of pre-18S rRNA	0.514614	0.982365	0.563658	-0.339881	0.508236	-0.510177	0.0491914	blue	0.64915	-0.628443	-0.503195	-0.651133	-0.604543	-0.709058	-0.751621	0.0208372	-0.32322	-0.455132	-0.713537	-0.0609486	-0.547357	-0.752461	-0.590919	-0.585078	-0.249107	0.171944	0.00743004	-0.765812	0.360966	0.0223632	0.0286243	0.0953882	0.0218212	0.0373189	0.00982269	0.00482007	0.948751	0.305464	0.137087	0.0091659	0.85075	0.0654786	0.00474641	0.0430414	0.0456753	0.434936
853030	YGR129W	SYF2	Member of the NineTeen Complex (NTC); NTC contains Prp19p and stabilizes U6 snRNA in catalytic forms of the spliceosome containing U2, U5, and U6 snRNAs; relocalizes to the cytosol in response to hypoxia; isy1 syf2 cells have defective spindles activiating cell cycle arrest	0.32291	0.927564	0.404501	-0.389881	0.582456	-0.390122	-0.142097	blue	0.54392	-0.655868	-0.529408	-0.636361	-0.596618	-0.718323	-0.730705	-0.0205546	-0.317811	-0.345843	-0.724849	0.0553918	-0.497035	-0.728106	-0.499309	-0.550708	-0.233462	0.268849	0.0921058	-0.657306	0.270942	0.0675357	0.0205657	0.0767147	0.0260977	0.0405769	0.00850102	0.00694776	0.949445	0.314093	0.270834	0.00765317	0.86424	0.100182	0.00725459	0.0983934	0.0635147	0.465222
853048	YGR145W	ENP2	Component of the SSU; required for pre-18S rRNA processing, biogenesis of the small ribosomal subunit; interacts with U3 snoRNA, Mpp10p and Bfr2p; contains WD repeats, and has homology to Spb1p	0.495126	0.979637	0.566898	-0.416084	0.339343	-0.67691	-0.0322839	blue	0.736862	-0.472658	-0.392517	-0.582033	-0.520734	-0.579128	-0.614318	0.237201	-0.166203	-0.339765	-0.640308	0.0843859	-0.427919	-0.658235	-0.480559	-0.448506	-0.110758	0.325901	0.112391	-0.869491	0.196606	0.00626002	0.120724	0.206916	0.0470927	0.0825897	0.0484731	0.0335625	0.457895	0.605679	0.279905	0.0249004	0.794291	0.165222	0.019958	0.113787	0.143629	0.731842
853062	YGR158C	MTR3	Exosome non-catalytic core component; involved in 3'-5' RNA processing and degradation in both the nucleus and the cytoplasm; has similarity to E. coli RNase PH and to human hMtr3p (EXOSC6)	0.523457	0.986032	0.639327	-0.355994	0.404438	-0.614353	0.0788939	blue	0.75148	-0.515911	-0.403155	-0.602559	-0.529958	-0.608292	-0.638287	0.195125	-0.195861	-0.402268	-0.659474	-0.00334239	-0.463584	-0.6826	-0.528274	-0.493044	-0.144672	0.264493	0.0577034	-0.829646	0.272216	0.0048325	0.0859852	0.193775	0.0381164	0.0763524	0.0358447	0.0255083	0.543367	0.541816	0.19485	0.0196454	0.991775	0.129027	0.014442	0.0774658	0.103372	0.653722
853064	YGR159C	NSR1	Nucleolar protein that binds nuclear localization sequences; required for pre-rRNA processing and ribosome biogenesis; binds to single stranded telomeric DNA and mRNA; methylated by Hmt1p; interaction with Top1p and nucleolar localization are negatively regulated by polyphosphorylation	0.558383	0.956593	0.562205	-0.370661	0.261145	-0.725323	-0.0908406	blue	0.718099	-0.429516	-0.393417	-0.584193	-0.53317	-0.551946	-0.594472	0.290996	-0.163822	-0.359415	-0.624951	0.0637492	-0.433705	-0.651477	-0.49643	-0.440942	-0.119672	0.291038	0.0724789	-0.906674	0.197975	0.00853131	0.163477	0.205784	0.0460841	0.0742579	0.0627997	0.0414931	0.358813	0.610926	0.251198	0.029793	0.843964	0.158957	0.021728	0.100661	0.151338	0.711047
853071	YGR162W	TIF4631	Translation initiation factor eIF4G; subunit of the mRNA cap-binding protein complex (eIF4F) that also contains eIF4E (Cdc33p); interacts with Pab1p and with eIF4A (Tif1p); also has a role in biogenesis of the large ribosomal subunit; TIF4631 has a paralog, TIF4632, that arose from the whole genome duplication	0.484422	0.902027	0.522783	-0.251995	0.639024	-0.29184	0.22779	blue	0.537936	-0.718897	-0.528964	-0.626124	-0.591814	-0.760259	-0.817586	-0.217756	-0.441816	-0.525569	-0.692235	-0.203441	-0.604597	-0.757647	-0.637525	-0.659441	-0.350329	0.00380193	-0.0732138	-0.56728	0.510173	0.0712233	0.00842368	0.0770085	0.0293966	0.0426476	0.00410271	0.00116073	0.496583	0.150434	0.0792786	0.0126062	0.525963	0.0372972	0.00431047	0.0257403	0.0196536	0.264248
853079	YGR169C	PUS6	tRNA:pseudouridine synthase; catalyzes the conversion of uridine to pseudouridine at position 31 in cytoplasmic and mitochondrial tRNAs; mutation of Asp168 to Ala abolishes enzyme activity; not essential for viability	0.288392	0.975132	0.535989	-0.446369	0.554411	-0.475363	0.0393517	blue	0.779698	-0.494186	-0.294953	-0.4956	-0.39408	-0.54881	-0.567996	0.198318	-0.120365	-0.250149	-0.591952	0.134717	-0.341733	-0.574152	-0.382466	-0.409834	-0.0301715	0.425591	0.241998	-0.704116	0.186414	0.00278516	0.102452	0.352012	0.101321	0.204953	0.0646219	0.0540285	0.536656	0.709438	0.432952	0.042587	0.676363	0.276949	0.050904	0.219819	0.185794	0.92584
853083	YGR173W	RBG2	Protein with a role in translation; forms a complex with Gir2p; has similarity to mammalian developmentally regulated GTP-binding protein	0.500358	0.951076	0.684044	-0.204504	0.664652	-0.31169	0.214475	blue	0.659988	-0.691227	-0.483911	-0.675755	-0.556771	-0.733202	-0.748458	-0.00957518	-0.393337	-0.533846	-0.748041	-0.199373	-0.588933	-0.752158	-0.63989	-0.661739	-0.301272	0.106431	-0.0521133	-0.610305	0.493826	0.0195166	0.0127897	0.110926	0.015861	0.0600657	0.00666238	0.00510506	0.976439	0.205885	0.073822	0.00514353	0.534446	0.0439244	0.00477289	0.0250252	0.0190828	0.341295
853086	YGR175C	ERG1	Squalene epoxidase; catalyzes the epoxidation of squalene to 2,3-oxidosqualene; plays an essential role in the ergosterol-biosynthesis pathway and is the specific target of the antifungal drug terbinafine; human SQLE functionally complements the lethality of the erg1 null mutation	0.68749	0.602412	0.579013	0.229921	0.557648	-0.0562751	-0.146645	blue	0.149848	-0.824097	-0.808008	-0.913257	-0.847827	-0.833306	-0.82451	-0.229554	-0.806095	-0.888752	-0.897946	-0.688626	-0.922266	-0.879942	-0.902298	-0.882376	-0.775126	-0.451382	-0.658662	-0.467017	0.79846	0.642052	0.000979159	0.00147366	3.34e-05	0.000494864	0.000760716	0.000968451	0.472938	0.00154324	0.000111028	7.33e-05	0.0132723	1.96e-05	0.000160056	5.94e-05	0.000145089	0.00306085
853088	YGR177C	ATF2	Alcohol acetyltransferase; may play a role in steroid detoxification; forms volatile esters during fermentation, which is important for brewing and winemaking	-0.145317	-0.725717	-0.759544	0.186279	-0.37695	0.381248	-0.358193	blue	-0.77933	0.155658	-0.115274	0.139392	-0.00623515	0.130035	0.145692	-0.480123	-0.174861	-0.0387418	0.223338	-0.242148	-0.0203181	0.180406	0.0458292	0.0727066	-0.339251	-0.571299	-0.435076	0.474109	0.0425109	0.00280667	0.629044	0.721285	0.665697	0.984656	0.687098	0.651417	0.114163	0.586745	0.904849	0.485331	0.448287	0.950026	0.574741	0.887532	0.822329	0.280681
853097	YGR185C	TYS1	Cytoplasmic tyrosyl-tRNA synthetase; required for cytoplasmic protein synthesis; interacts with positions 34 and 35 of the tRNATyr anticodon; mutations in human ortholog YARS are associated with Charcot-Marie-Tooth (CMT) neuropathies; human ortholog YARS functionally complements the heat sensitivity of a ts allele; protein abundance increases in response to DNA replication stress	0.421699	0.973495	0.637855	-0.299755	0.641516	-0.36959	0.151792	blue	0.661106	-0.656485	-0.457242	-0.634563	-0.535187	-0.707783	-0.718335	0.0123985	-0.312245	-0.412607	-0.717809	-0.0522641	-0.504134	-0.721649	-0.552471	-0.589964	-0.20205	0.222927	0.0643401	-0.653577	0.355904	0.0192389	0.0204058	0.135045	0.0266567	0.0729631	0.010016	0.00849939	0.969494	0.32311	0.182541	0.00857069	0.871849	0.0946712	0.00806059	0.0624981	0.0434644	0.528857
853099	YGR187C	HGH1	Nonessential protein of unknown function; predicted to be involved in ribosome biogenesis; green fluorescent protein (GFP)-fusion protein localizes to the cytoplasm; similar to mammalian BRP16 (Brain protein 16); relative distribution to the nucleus increases upon DNA replication stress	0.503306	0.974514	0.526977	-0.416216	0.422823	-0.590769	-0.0424256	blue	0.669353	-0.588476	-0.504609	-0.672592	-0.60908	-0.689814	-0.715707	0.0907676	-0.29221	-0.436757	-0.734216	-0.0123247	-0.539291	-0.746817	-0.572418	-0.556146	-0.247149	0.22368	0.0109576	-0.828136	0.301152	0.0172784	0.0441297	0.0943098	0.0165501	0.03554	0.0130503	0.00885982	0.779062	0.35672	0.155715	0.00654897	0.969676	0.070377	0.00525785	0.0517709	0.060415	0.438672
853104	YGR191W	HIP1	High-affinity histidine permease; also involved in the transport of manganese ions	0.37378	0.98356	0.50678	-0.445278	0.527193	-0.501731	0.0994955	blue	0.741491	-0.554711	-0.375048	-0.530621	-0.479245	-0.616298	-0.661332	0.0712032	-0.193565	-0.343389	-0.61551	0.0493799	-0.428979	-0.646982	-0.465975	-0.469425	-0.130558	0.303953	0.146987	-0.717859	0.27577	0.00577767	0.0612226	0.229645	0.0759165	0.114922	0.0328362	0.019183	0.825952	0.546657	0.274476	0.0331238	0.878873	0.164062	0.0229672	0.126803	0.123641	0.685896
853109	YGR195W	SKI6	Exosome non-catalytic core component; involved in 3'-5' RNA processing and degradation in both the nucleus and the cytoplasm; has similarity to E. coli RNase PH and to human hRrp41p (EXOSC4)	0.466861	0.992014	0.649599	-0.35052	0.525729	-0.502171	0.123909	blue	0.749508	-0.575509	-0.402489	-0.612364	-0.507458	-0.64178	-0.663593	0.139283	-0.255387	-0.413522	-0.686716	-0.0258819	-0.486484	-0.688274	-0.535513	-0.536567	-0.173155	0.266689	0.0746951	-0.745123	0.325987	0.00500908	0.0502331	0.194582	0.0342908	0.0921623	0.0244642	0.0186314	0.665945	0.423054	0.181476	0.0136352	0.936363	0.108762	0.0133386	0.0727556	0.0720863	0.590459
853111	YGR197C	SNG1	Protein involved in resistance to nitrosoguanidine and 6-azauracil; expression is regulated by transcription factors involved in multidrug resistance; SNG1 has a paralog, YJR015W, that arose from the whole genome duplication	-0.0986645	0.601261	0.16834	-0.463627	0.286198	-0.369623	-0.233108	blue	0.298083	-0.285749	-0.192076	-0.207632	-0.229323	-0.308394	-0.316842	0.0871311	0.0330909	0.243917	-0.311393	0.54581	-0.00137269	-0.294136	0.0449711	-0.0765712	0.214444	0.599272	0.506656	-0.446567	-0.289126	0.346683	0.367938	0.549807	0.517285	0.473396	0.32943	0.315652	0.787732	0.918684	0.444875	0.324503	0.066399	0.996622	0.353412	0.889627	0.813028	0.503314
853114	YGR200C	ELP2	Subunit of Elongator complex; binds to microtubules via conserved alkaline residues; has two seven-bladed WD40 &#946; propellers; Elongator complex is required for modification of wobble nucleosides in tRNA; target of Kluyveromyces lactis zymocin	0.494773	0.985723	0.556345	-0.401755	0.406583	-0.614762	0.0161734	blue	0.727586	-0.520097	-0.410238	-0.587388	-0.533516	-0.613649	-0.655574	0.162607	-0.213722	-0.383517	-0.648661	0.0318416	-0.464758	-0.679964	-0.514604	-0.488332	-0.156409	0.273096	0.083913	-0.822028	0.265081	0.00731719	0.0830328	0.185318	0.0446206	0.0740344	0.0338109	0.0206419	0.613611	0.504787	0.218447	0.0224986	0.921746	0.127932	0.0149768	0.0869212	0.107225	0.627368
853117	YGR203W	YCH1	Phosphatase with sequence similarity to Cdc25p; Arr2p and Mih1p; member of the single-domain rhodanese homology superfamily; green fluorescent protein (GFP)-fusion protein localizes to both the cytoplasm and the nucleus	-0.140913	-0.841082	-0.36868	0.666545	-0.249026	0.661208	-0.0329186	blue	-0.816286	0.189071	0.0327054	0.240854	0.158153	0.266404	0.296503	-0.341731	-0.141307	-0.00614978	0.328098	-0.383682	0.0804981	0.309766	0.116376	0.109309	-0.204905	-0.591008	-0.427858	0.746787	0.111396	0.00119989	0.556185	0.919629	0.450792	0.623486	0.402604	0.349368	0.276953	0.661346	0.984867	0.297799	0.218233	0.803601	0.327171	0.718716	0.735237	0.522926
853120	YGR206W	MVB12	ESCRT-I subunit required to stabilize ESCRT-I core complex oligomers; the ESCRT-I core complex (Stp22p, Vps28p, Srn2p) is involved in ubiquitin-dependent sorting of proteins into the endosome; deletion mutant is sensitive to rapamycin and nystatin	-0.729682	-0.677165	-0.857112	-0.312334	-0.533072	0.138702	-0.232379	blue	-0.355014	0.572829	0.44131	0.647417	0.500453	0.599858	0.629369	-0.0387957	0.555538	0.615525	0.6395	0.46042	0.609695	0.643523	0.70341	0.70875	0.355253	0.220071	0.288937	0.470337	-0.609982	0.25747	0.0515649	0.150957	0.022845	0.0975027	0.0392217	0.0283203	0.904717	0.0607567	0.0331186	0.0251421	0.132006	0.0353037	0.0239549	0.0107002	0.00986913	0.257128
853129	YGR215W	RSM27	Mitochondrial ribosomal protein of the small subunit	0.0160717	0.700377	0.343908	-0.323205	0.606552	-0.147615	-0.19029	blue	0.488573	-0.524531	-0.365065	-0.500158	-0.431946	-0.52034	-0.430686	0.0901105	-0.123673	-0.228299	-0.593955	0.0698046	-0.314205	-0.524763	-0.301609	-0.355436	-0.129369	0.341863	0.0842647	-0.409606	0.130279	0.107025	0.0799815	0.243276	0.097732	0.160846	0.0828636	0.162207	0.780627	0.70177	0.475428	0.0417159	0.829326	0.319918	0.0798241	0.340729	0.256866	0.688629
853144	YGR229C	SMI1	Protein involved in the regulation of cell wall synthesis; proposed to be involved in coordinating cell cycle progression with cell wall integrity	0.50599	0.938715	0.59091	-0.19892	0.68959	-0.278948	0.119738	blue	0.545759	-0.78069	-0.608007	-0.731569	-0.675554	-0.819951	-0.844418	-0.154981	-0.477698	-0.58504	-0.798072	-0.244747	-0.666255	-0.831202	-0.695372	-0.718509	-0.401125	0.0139503	-0.134155	-0.604529	0.537278	0.0664293	0.00272795	0.0359551	0.00684806	0.015904	0.00109202	0.00054952	0.630555	0.116268	0.045693	0.00186289	0.443277	0.0179967	0.000806912	0.0120477	0.00847584	0.196242
853148	YGR233C	PHO81	Cyclin-dependent kinase (CDK) inhibitor; regulates Pho80p-Pho85p and Pcl7p-Pho85p cyclin-CDK complexes in response to phosphate levels; inhibitory activity for Pho80p-Pho85p requires myo-D-inositol heptakisphosphate (IP7) generated by Vip1p; relative distribution to the nucleus increases upon DNA replication stress	-0.118666	0.813961	0.284395	-0.673106	0.49906	-0.388437	0.110965	blue	0.746502	-0.312004	-0.0335561	-0.171141	-0.11985	-0.307725	-0.321014	0.152666	0.134021	0.0899447	-0.307102	0.431597	-0.0345599	-0.289888	-0.0217337	-0.0922725	0.21985	0.656114	0.531759	-0.487427	-0.105371	0.00528754	0.323503	0.917544	0.594853	0.710633	0.330536	0.308967	0.635732	0.677956	0.781022	0.331566	0.161222	0.915086	0.360731	0.946548	0.775481	0.492349
853151	YGR236C	SPG1	Protein required for high temperature survival during stationary phase; not required for growth on nonfermentable carbon sources; the authentic, non-tagged protein is detected in highly purified mitochondria in high-throughput studies	0.612763	0.760414	0.560097	-0.107178	0.283461	-0.487113	-0.12922	blue	0.638463	-0.421829	-0.427413	-0.661045	-0.547935	-0.530822	-0.51519	0.320836	-0.240202	-0.596135	-0.664522	-0.28094	-0.546943	-0.642095	-0.630714	-0.52624	-0.32136	0.0252506	-0.257876	-0.73214	0.424191	0.0254549	0.17198	0.165777	0.0192539	0.0651366	0.0757846	0.0865009	0.30925	0.452056	0.0407818	0.0184081	0.376405	0.0657241	0.0243715	0.0278824	0.0788264	0.308417
853154	YGR239C	PEX21	Peroxin required for peroxisomal matrix protein targeting; acts on proteins containing the PTS2 targeting sequence; interacts with Pex7p; constitutively expressed; partially redundant with Pex18p; required for import of the Gpd1p-Pnc1p heterodimer in which only Gpd1p has a peroxisomal targeting signal; relative distribution to cytoplasmic foci increases upon DNA replication stress	0.494951	0.935887	0.650033	-0.266367	0.304945	-0.660074	-0.119959	blue	0.606082	-0.482074	-0.431681	-0.58838	-0.57019	-0.559062	-0.586751	0.272914	-0.182802	-0.280606	-0.636368	0.120714	-0.404292	-0.659758	-0.437816	-0.420831	-0.0747841	0.341535	0.11364	-0.851248	0.122701	0.0367087	0.112488	0.161131	0.0441726	0.0529001	0.0587973	0.0449094	0.39076	0.569585	0.376997	0.0260955	0.708626	0.192401	0.0195741	0.1546	0.173104	0.817327
853160	YGR245C	SDA1	Protein required for actin organization and passage through Start; highly conserved nuclear protein; required for actin cytoskeleton organization; plays a critical role in G1 events; binds Nap1p; involved in 60S ribosome biogenesis	0.472919	0.973381	0.554479	-0.431555	0.313477	-0.694464	-0.00335101	blue	0.757063	-0.421764	-0.332596	-0.520773	-0.46782	-0.529101	-0.571447	0.266478	-0.109861	-0.287543	-0.580063	0.13372	-0.369345	-0.6097	-0.430884	-0.396066	-0.0492857	0.36314	0.169102	-0.859733	0.152178	0.00435797	0.172053	0.290826	0.082563	0.125106	0.0769176	0.0522609	0.402469	0.733942	0.364804	0.0480257	0.678643	0.237375	0.0353016	0.161992	0.202473	0.879103
853166	YGR251W	NOP19	Ribosome biogenesis factor; nucleolar protein associated with pre-rRNA components of the 90S preribosome, required for cleavage of pre-rRNA at A0, A1 and A2 sites; interacts with RNA helicase Dhr2p and RNA helicase-like protein Utp25p; required for incorporation of Utp25p into preribosomes	0.629609	0.966012	0.672754	-0.236866	0.396755	-0.593358	0.0309686	blue	0.6208	-0.585384	-0.510918	-0.679012	-0.629695	-0.679544	-0.723344	0.115823	-0.33321	-0.470422	-0.717552	-0.0826072	-0.556306	-0.758003	-0.613627	-0.585247	-0.239236	0.144023	-0.0393343	-0.836052	0.341588	0.0312263	0.0455345	0.0895992	0.0151735	0.0282137	0.0150634	0.00784283	0.720004	0.28988	0.122737	0.00860555	0.798547	0.0603256	0.00428165	0.0338188	0.0455976	0.453932
853175	YGR260W	TNA1	High affinity nicotinic acid plasma membrane permease; responsible for uptake of low levels of nicotinic acid; expression of the gene increases in the absence of extracellular nicotinic acid or para-aminobenzoate (PABA)	0.350183	0.83224	0.287987	-0.432474	0.615205	-0.261711	0.088172	blue	0.45199	-0.757145	-0.624362	-0.674055	-0.649797	-0.824091	-0.844287	-0.359972	-0.439146	-0.511546	-0.75332	-0.166967	-0.624987	-0.790423	-0.624917	-0.658458	-0.433294	-0.000171808	-0.116279	-0.54308	0.45623	0.140165	0.00435123	0.0299936	0.0162286	0.0221855	0.000979314	0.000551696	0.25041	0.153207	0.0891386	0.00467195	0.604001	0.029781	0.00221271	0.0298046	0.0199014	0.159397
853197	YGR280C	PXR1	Essential protein involved in rRNA and snoRNA maturation; competes with TLC1 RNA for binding to Est2p, suggesting a role in negative regulation of telomerase; human homolog inhibits telomerase; contains a G-patch RNA interacting domain	0.562172	0.963527	0.590012	-0.358969	0.300652	-0.695364	-0.044608	blue	0.671687	-0.491044	-0.445742	-0.616154	-0.579006	-0.604995	-0.644678	0.201422	-0.208343	-0.373584	-0.658585	0.0427327	-0.464266	-0.694448	-0.521702	-0.478362	-0.147724	0.255272	0.0480752	-0.895463	0.212148	0.0167514	0.104996	0.146416	0.0328885	0.0485318	0.0371389	0.0236217	0.530168	0.515818	0.231615	0.0198692	0.895093	0.12839	0.0122103	0.0819197	0.115689	0.646832
853199	YGR282C	BGL2	Endo-beta-1,3-glucanase; major protein of the cell wall, involved in cell wall maintenance; involved in incorporation of newly synthesized mannoprotein molecules into the cell wall	0.343022	0.847974	0.585655	-0.2232	0.254729	-0.621834	-0.0977803	blue	0.716279	-0.196429	-0.100883	-0.290746	-0.249901	-0.2635	-0.313183	0.531472	0.10633	-0.0422394	-0.343289	0.289589	-0.10288	-0.361356	-0.186354	-0.165813	0.231823	0.52741	0.36219	-0.741331	-0.0446277	0.00878039	0.540621	0.75507	0.359246	0.433424	0.407946	0.32158	0.07536	0.742233	0.896298	0.274626	0.361249	0.750357	0.24846	0.561976	0.606539	0.468451
853202	YGR285C	ZUO1	Ribosome-associated chaperone; zuotin functions in ribosome biogenesis and as a chaperone for nascent polypeptide chains in partnership with Ssz1p and SSb1/2; contains a DnaJ domain and functions as a J-protein partner for Ssb1p and Ssb2p; human gene DNAJC2 can partially complement yeast zuo1 null mutant	0.496511	0.913823	0.702484	-0.132273	0.681105	-0.252704	0.15962	blue	0.619801	-0.690707	-0.487197	-0.695239	-0.557003	-0.724545	-0.718968	0.0266223	-0.423387	-0.550379	-0.762544	-0.229766	-0.599582	-0.74657	-0.648555	-0.677563	-0.324318	0.0867149	-0.0871648	-0.56761	0.509098	0.0315787	0.0128852	0.108167	0.012071	0.0599367	0.00769117	0.00841427	0.934546	0.170235	0.0637057	0.00392729	0.472517	0.0393357	0.00528116	0.0225279	0.0154764	0.30373
853203	YGR286C	BIO2	Biotin synthase; catalyzes the conversion of dethiobiotin to biotin, which is the last step of the biotin biosynthesis pathway; complements E. coli bioB mutant	-0.0386828	0.844049	0.376539	-0.655557	0.432501	-0.474634	0.166463	blue	0.804356	-0.267251	-0.00618982	-0.181849	-0.091777	-0.290381	-0.306865	0.247774	0.165096	0.103982	-0.31414	0.455854	-0.0154758	-0.286621	-0.0282947	-0.0920084	0.26826	0.696709	0.564576	-0.553129	-0.129747	0.00160864	0.401054	0.984768	0.571636	0.77666	0.359877	0.331959	0.437478	0.608116	0.74776	0.320023	0.136386	0.961927	0.366413	0.930443	0.776109	0.399208
853210	YGR294W	PAU12	Protein of unknown function; member of the seripauperin multigene family encoded mainly in subtelomeric regions; SWAT-GFP fusion protein localizes to both the endoplasmic reticulum and vacuole	0.308455	0.541417	0.552755	-0.0262738	0.227503	-0.318626	0.0371821	blue	0.544735	-0.195063	-0.156069	-0.361528	-0.286749	-0.257089	-0.17195	0.393127	0.106007	-0.270205	-0.369045	-0.0784126	-0.174391	-0.356492	-0.299204	-0.209617	0.0133707	0.180584	-0.0647002	-0.478366	0.0966808	0.0670442	0.543496	0.628128	0.248218	0.366189	0.419862	0.593086	0.206149	0.742993	0.395667	0.237786	0.808605	0.587768	0.255353	0.344783	0.513198	0.967103
853218	YJL212C	OPT1	Proton-coupled oligopeptide transporter of the plasma membrane; also transports glutathione and phytochelatin; member of the OPT family	-0.574923	-0.721614	-0.607836	-0.0475139	-0.223184	0.51635	0.452773	blue	-0.420226	0.422808	0.50681	0.685313	0.628027	0.505976	0.491279	-0.416576	0.267267	0.425368	0.682195	0.113568	0.487503	0.638542	0.525352	0.472129	0.226351	-0.143001	0.167992	0.781346	-0.232047	0.173788	0.170882	0.0926481	0.0139064	0.0287619	0.0932749	0.104804	0.177948	0.401024	0.168032	0.0145232	0.725268	0.107913	0.025431	0.0794252	0.121198	0.479305
853222	YJL208C	NUC1	Major mitochondrial nuclease; has RNAse and DNA endo- and exonucleolytic activities; roles in mitochondrial recombination, apoptosis and maintenance of polyploidy; involved in fragmentation of genomic DNA during PND (programmed nuclear destruction); encodes ortholog of mammalian endoG	0.573908	0.976188	0.663727	-0.318749	0.391547	-0.612625	0.081125	blue	0.720165	-0.509126	-0.410857	-0.623209	-0.527596	-0.619585	-0.647604	0.197573	-0.230658	-0.407515	-0.67282	-0.01369	-0.472997	-0.689989	-0.553421	-0.525934	-0.150969	0.235831	0.0474472	-0.837771	0.279466	0.00825487	0.0909205	0.184589	0.0303888	0.0779176	0.0316553	0.0227926	0.538219	0.470752	0.188541	0.0164996	0.966318	0.12042	0.0130178	0.0619548	0.0790324	0.639535
853241	YJL198W	PHO90	Low-affinity phosphate transporter; acts upstream of Pho81p in regulation of the PHO pathway; deletion of pho84, pho87, pho89, pho90, and pho91 causes synthetic lethality; transcription independent of Pi and Pho4p activity; overexpression results in vigorous growth; PHO90 has a paralog, PHO87, that arose from the whole genome duplication	0.491515	0.887134	0.413311	-0.350241	0.257454	-0.657366	-0.0647947	blue	0.628757	-0.35186	-0.296232	-0.412462	-0.429179	-0.465327	-0.557988	0.202189	-0.115873	-0.241464	-0.450767	0.140064	-0.320434	-0.538335	-0.393684	-0.35334	-0.0271291	0.273428	0.180932	-0.795801	0.151726	0.0285212	0.262023	0.349829	0.18271	0.163844	0.127404	0.0593897	0.528568	0.719888	0.449609	0.141374	0.66417	0.309891	0.0709734	0.205449	0.259881	0.933303
853244	YJL194W	CDC6	Essential ATP-binding protein required for DNA replication; component of the pre-replicative complex (pre-RC) which requires ORC to associate with chromatin and is in turn required for Mcm2-7p DNA association; homologous to S. pombe Cdc18p; relocalizes from nucleus to cytoplasm upon DNA replication stress; degraded in response to plasma membrane stress	0.126727	0.85362	0.424017	-0.540163	0.588034	-0.310606	0.367505	blue	0.852391	-0.455361	-0.143257	-0.331493	-0.235576	-0.450551	-0.466779	0.0489486	-0.0556615	-0.295858	-0.443804	0.024349	-0.302694	-0.449705	-0.318799	-0.32157	-0.0726233	0.343314	0.198649	-0.456476	0.288028	0.000428423	0.136864	0.656925	0.292527	0.461074	0.141588	0.126062	0.879925	0.863585	0.350466	0.148391	0.940126	0.338909	0.14243	0.312506	0.308082	0.82253
853248	YJL191W	RPS14B	Protein component of the small (40S) ribosomal subunit; required for ribosome assembly and 20S pre-rRNA processing; mutations confer cryptopleurine resistance; homologous to mammalian ribosomal protein S14 and bacterial S11; RPS14B has a paralog, RPS14A, that arose from the whole genome duplication	0.744251	0.893565	0.74145	-0.0169134	0.370359	-0.531	-0.0949447	blue	0.54164	-0.583618	-0.581537	-0.778315	-0.691577	-0.69366	-0.70881	0.21095	-0.397074	-0.58093	-0.787361	-0.233638	-0.628059	-0.795376	-0.710072	-0.662094	-0.326414	0.0268288	-0.204969	-0.824899	0.427604	0.068925	0.0463512	0.0473262	0.00286651	0.0127257	0.0123502	0.00986009	0.510459	0.201222	0.0476136	0.00236602	0.464876	0.0287514	0.00198099	0.00967105	0.0189958	0.300433
853253	YJL186W	MNN5	Alpha-1,2-mannosyltransferase; responsible for addition of the second alpha-1,2-linked mannose of the branches on the mannan backbone of oligosaccharides, localizes to an early Golgi compartment	0.302737	0.746777	0.516469	-0.125068	0.456327	-0.300854	0.216378	blue	0.432112	-0.381653	-0.213623	-0.282706	-0.280932	-0.432045	-0.48438	0.0375975	-0.0812449	-0.0539598	-0.346602	0.19192	-0.152685	-0.432642	-0.250804	-0.313505	0.126003	0.292037	0.315471	-0.449439	0.0704483	0.160666	0.220884	0.504989	0.373283	0.37642	0.160738	0.110529	0.907649	0.801811	0.867722	0.269714	0.550136	0.63569	0.160097	0.431709	0.321056	0.696386
853265	YJL174W	KRE9	Glycoprotein involved in cell wall beta-glucan assembly; null mutation leads to severe growth defects, aberrant multibudded morphology, and mating defects	0.360853	0.970458	0.659593	-0.278058	0.644319	-0.367465	0.122459	blue	0.727511	-0.602623	-0.373337	-0.567317	-0.467967	-0.61829	-0.638863	0.130151	-0.246548	-0.372111	-0.657371	-0.0234837	-0.45018	-0.647324	-0.479524	-0.511475	-0.138151	0.304228	0.119881	-0.63288	0.333501	0.00732625	0.0380906	0.231948	0.054381	0.124971	0.0321167	0.0253339	0.686832	0.439822	0.233607	0.0201782	0.942251	0.141957	0.0228711	0.11468	0.0891906	0.668524
853273	YJL166W	QCR8	Subunit 8 of ubiquinol cytochrome-c reductase (Complex III); Complex III is a component of the mitochondrial inner membrane electron transport chain; oriented facing the intermembrane space; expression is regulated by Abf1p and Cpf1p	-0.393866	-0.800075	-0.554883	0.344073	-0.226252	0.600834	-0.363427	blue	-0.776681	0.155325	-0.015749	0.173798	0.106995	0.237379	0.335785	-0.293697	-0.0918347	0.0919195	0.222647	-0.182559	0.0974846	0.290278	0.213626	0.174367	-0.21041	-0.365057	-0.338481	0.6647	-0.0669889	0.00296487	0.629787	0.961255	0.589057	0.740669	0.457548	0.285939	0.354163	0.776523	0.776321	0.486716	0.570108	0.76311	0.360055	0.504984	0.58782	0.511568
853280	YJL160C	PIR5	Putative protein of unknown function; member of the PIR (Proteins with Internal Repeats) family of cell wall proteins; SWAT-GFP fusion protein localizes to the endoplasmic reticulum and vacuole, and mCherry fusion localizes to the vacuole; non-essential gene that is required for sporulation; mRNA is weakly cell cycle regulated, peaking in mitosis; YJL160C has a paralog, PIR1, that arose from the …	0.0708138	0.509717	0.14694	-0.278637	0.28502	-0.220135	0.222022	blue	0.526997	-0.0584178	0.127225	0.033971	0.0918506	-0.116371	-0.181953	0.181836	0.144363	0.0823602	-0.0407118	0.274772	0.0700585	-0.0944595	-0.0216006	-0.059678	0.23572	0.37321	0.444964	-0.211472	0.0117564	0.0783181	0.85689	0.693568	0.916528	0.776485	0.718726	0.571411	0.571664	0.65442	0.799139	0.900032	0.387412	0.828714	0.770285	0.946875	0.853831	0.460791
853285	YJL156C	SSY5	Serine protease of SPS plasma membrane amino acid sensor system; contains an inhibitory domain that dissociates in response to extracellular amino acids, freeing a catalytic domain to activate transcription factor Stp1p; other members are Ssy1p and Ptr3p	0.205869	0.929592	0.4664	-0.396992	0.700837	-0.279834	0.151583	blue	0.687011	-0.60762	-0.348753	-0.474908	-0.422136	-0.614706	-0.64245	-0.0274193	-0.191059	-0.295513	-0.584603	0.0423743	-0.385221	-0.601983	-0.403291	-0.455292	-0.112293	0.319474	0.190533	-0.524784	0.293044	0.0135786	0.0361057	0.266552	0.118721	0.171635	0.0334193	0.0242675	0.93259	0.551961	0.351056	0.0458945	0.895969	0.216235	0.0383501	0.193611	0.136931	0.728247
853293	YJL148W	RPA34	RNA polymerase I subunit A34.5; essential for nucleolar assembly and for high polymerase loading rate; nucleolar localization depends on Rpa49p	0.515608	0.967537	0.563864	-0.410829	0.29535	-0.706679	-0.0297384	blue	0.707043	-0.455932	-0.395879	-0.572293	-0.527454	-0.571535	-0.611591	0.226601	-0.157768	-0.321228	-0.623683	0.101502	-0.414472	-0.65516	-0.472957	-0.435821	-0.096277	0.315046	0.113947	-0.887015	0.168024	0.0101294	0.136311	0.202707	0.0518338	0.0780123	0.0522162	0.0345822	0.478807	0.624343	0.308626	0.0302256	0.753609	0.180374	0.0207499	0.120457	0.156705	0.765972
853303	YJL138C	TIF2	Translation initiation factor eIF4A; DEA(D/H)-box RNA helicase that couples ATPase activity to RNA binding and unwinding; forms a dumbbell structure of two compact domains connected by a linker; interacts with eIF4G; protein abundance increases in response to DNA replication stress; TIF2 has a paralog, TIF1, that arose from the whole genome duplication	0.525698	0.948119	0.658502	-0.189682	0.675349	-0.301966	0.120271	blue	0.616605	-0.743032	-0.561773	-0.742771	-0.639835	-0.783159	-0.791387	-0.0436757	-0.460816	-0.605269	-0.806716	-0.261042	-0.66379	-0.809097	-0.699505	-0.712109	-0.389684	0.0427525	-0.142112	-0.630968	0.543326	0.0327247	0.00562341	0.0573202	0.00564938	0.0250417	0.00258938	0.00216608	0.89279	0.131631	0.0370302	0.00152036	0.412495	0.0185838	0.00143513	0.0113399	0.00937168	0.210505
853311	YJL130C	URA2	Bifunctional carbamoylphosphate synthetase/aspartate transcarbamylase; catalyzes the first two enzymatic steps in the de novo biosynthesis of pyrimidines; both activities are subject to feedback inhibition by UTP	0.246428	0.957576	0.445115	-0.593915	0.403981	-0.607791	0.0787234	blue	0.832566	-0.382452	-0.203884	-0.390042	-0.324252	-0.456079	-0.489558	0.229373	0.006588	-0.161288	-0.485649	0.248532	-0.247108	-0.496137	-0.287614	-0.28474	0.055178	0.496718	0.322303	-0.748903	0.0703774	0.000776717	0.219838	0.525043	0.21005	0.303833	0.136168	0.106214	0.473296	0.983788	0.616529	0.109461	0.436032	0.438751	0.100894	0.36468	0.369706	0.86476
853312	YJL129C	TRK1	Component of the Trk1p-Trk2p potassium transport system; 180 kDa high affinity potassium transporter; phosphorylated in vivo and interacts physically with the phosphatase Ppz1p, suggesting Trk1p acitivy is regulated by phosphorylation; TRK1 has a paralog, TRK2, that arose from the whole genome duplication	0.251619	0.825582	0.373139	-0.321275	0.654264	-0.222795	0.182637	blue	0.532412	-0.587819	-0.369149	-0.428593	-0.430583	-0.605781	-0.663492	-0.18536	-0.234189	-0.30975	-0.51081	-0.032921	-0.387025	-0.577213	-0.422945	-0.462474	-0.148051	0.148991	0.107956	-0.472565	0.325383	0.0747484	0.0444253	0.237643	0.164483	0.162318	0.0368276	0.0186557	0.564101	0.463794	0.327196	0.0896784	0.9191	0.213908	0.0493988	0.170729	0.130067	0.646097
853317	YJL125C	GCD14	Subunit of tRNA (1-methyladenosine) methyltransferase; required, along with Gcd10p, for the modification of the adenine at position 58 in tRNAs, especially tRNAi-Met; first identified as a negative regulator of GCN4 expression	0.601356	0.978366	0.639676	-0.22993	0.478748	-0.526143	-0.0207175	blue	0.648054	-0.614495	-0.522734	-0.703501	-0.629352	-0.704575	-0.740297	0.126406	-0.352973	-0.50679	-0.751061	-0.117649	-0.582926	-0.770746	-0.638905	-0.620429	-0.274326	0.145268	-0.0514619	-0.800514	0.398315	0.0226672	0.0334974	0.0812089	0.0106855	0.0283258	0.0105147	0.0058993	0.695455	0.260411	0.0926627	0.00486957	0.715749	0.0466736	0.003344	0.0253213	0.0313568	0.388215
853320	YJL122W	ALB1	Shuttling pre-60S factor; involved in the biogenesis of ribosomal large subunit; interacts directly with Arx1p; responsible for Tif6p recycling defects in absence of Rei1p	0.571476	0.924087	0.572237	-0.372109	0.155188	-0.795865	-0.105875	blue	0.700846	-0.355581	-0.356377	-0.551718	-0.504529	-0.494218	-0.533677	0.352375	-0.107127	-0.300137	-0.582192	0.120913	-0.376923	-0.609125	-0.449183	-0.382304	-0.0590062	0.322365	0.0996185	-0.945287	0.111569	0.0111172	0.256657	0.255519	0.0629306	0.0943702	0.102426	0.0739308	0.261276	0.74036	0.343208	0.0470179	0.708165	0.227138	0.0355228	0.142951	0.220031	0.855462
853326	YJL116C	NCA3	Protein involved in mitochondrion organization; functions with Nca2p to regulate mitochondrial expression of subunits 6 (Atp6p) and 8 (Atp8p) of the Fo-F1 ATP synthase; SWAT-GFP, seamless-GFP and mCherry fusion proteins localize to the vacuole; member of the SUN family; expression induced in cells treated with the mycotoxin patulin; NCA3 has a paralog, UTH1, that arose from the whole genome dupli…	0.30169	0.97061	0.536551	-0.51267	0.440055	-0.583825	0.0467975	blue	0.846377	-0.443589	-0.270473	-0.485786	-0.392756	-0.50203	-0.52069	0.266515	-0.0634174	-0.267755	-0.576068	0.136074	-0.339528	-0.55767	-0.367972	-0.35546	-0.031978	0.447574	0.213892	-0.767338	0.161242	0.000517562	0.148611	0.395179	0.109346	0.206615	0.0962828	0.0826205	0.402401	0.844768	0.400131	0.0499584	0.673262	0.280263	0.0595659	0.239259	0.256831	0.921411
853334	YJL110C	GZF3	GATA zinc finger protein; negatively regulates nitrogen catabolic gene expression by competing with Gat1p for GATA site binding; function requires a repressive carbon source; dimerizes with Dal80p and binds to Tor1p; GZF3 has a paralog, DAL80, that arose from the whole genome duplication	0.403366	0.99282	0.595009	-0.393881	0.547708	-0.492825	0.100602	blue	0.76765	-0.563701	-0.380807	-0.573861	-0.48983	-0.620145	-0.647936	0.128821	-0.205947	-0.381281	-0.654249	0.00172233	-0.451969	-0.660284	-0.49535	-0.494167	-0.141407	0.297342	0.105672	-0.739131	0.299135	0.00355584	0.0562861	0.221995	0.0510491	0.10599	0.0314571	0.0227	0.689891	0.520766	0.221371	0.0209888	0.995761	0.140185	0.0194427	0.10152	0.102467	0.661119
853335	YJL109C	UTP10	Nucleolar protein; component of the small subunit (SSU) processome containing the U3 snoRNA that is involved in processing of pre-18S rRNA; mutant has increased aneuploidy tolerance	0.511798	0.975471	0.529029	-0.395841	0.427691	-0.58247	0.0639303	blue	0.730636	-0.529597	-0.412328	-0.582165	-0.528903	-0.626097	-0.677772	0.111669	-0.230806	-0.424674	-0.640612	-0.0239305	-0.486405	-0.683156	-0.545078	-0.511481	-0.1895	0.214614	0.0478754	-0.796309	0.322537	0.00695579	0.0765899	0.182867	0.0470303	0.0770486	0.0294057	0.0154325	0.729707	0.470459	0.168801	0.0248098	0.941153	0.108828	0.0143309	0.0668379	0.0891863	0.555271
853340	YJL104W	PAM16	Subunit of the import motor (PAM complex); the PAM complex is a component of the Translocase of the Inner Mitochondrial membrane (TIM23 complex); forms a 1:1 subcomplex with Pam18p and inhibits its cochaperone activity; contains a J-like domain	0.112857	0.888659	0.53593	-0.415695	0.676592	-0.267626	0.213443	blue	0.697905	-0.504644	-0.211649	-0.388964	-0.275944	-0.507796	-0.505539	0.0744682	-0.0972028	-0.133995	-0.509063	0.182153	-0.240285	-0.483238	-0.270125	-0.357913	0.0478069	0.455872	0.337275	-0.489061	0.136164	0.0116102	0.0942829	0.509027	0.211424	0.385308	0.0919098	0.0936054	0.818087	0.763778	0.678014	0.0909673	0.570981	0.451895	0.111497	0.395813	0.253328	0.882708
853347	YJL098W	SAP185	Protein that forms a complex with the Sit4p protein phosphatase; required for Sit4p function; member of a family of similar proteins including Sap4p, Sap155p, and Sap190p; SAP185 has a paralog, SAP190, that arose from the whole genome duplication	0.551902	0.980802	0.600594	-0.337937	0.368121	-0.644501	-0.00942574	blue	0.697864	-0.507239	-0.424762	-0.601424	-0.554469	-0.608069	-0.655434	0.194752	-0.223211	-0.386172	-0.650465	0.0223561	-0.468397	-0.687574	-0.527991	-0.494484	-0.1484	0.253164	0.0646682	-0.855803	0.25677	0.0116172	0.0923264	0.168704	0.0385782	0.0613595	0.0359312	0.0206783	0.544152	0.485584	0.215007	0.0220027	0.94502	0.124578	0.0134713	0.0776547	0.102213	0.645311
853355	YJL090C	DPB11	DNA replication initiation protein; loads DNA pol epsilon onto pre-replication complexes at origins; checkpoint sensor recruited to stalled replication forks by the checkpoint clamp complex where it activates Mec1p; along with Rfa1p, binds to ultrafine anaphase bridges in mitotic cells and prevents accumulation of chromatin bridges by stimulating the Mec1p kinase and suppressing homologous recomb…	0.416284	0.986064	0.597038	-0.333001	0.613491	-0.417899	0.0820953	blue	0.727659	-0.626561	-0.436522	-0.618826	-0.536584	-0.670059	-0.694681	0.0767783	-0.276607	-0.444863	-0.69832	-0.0738241	-0.513026	-0.70329	-0.548914	-0.554845	-0.213416	0.232992	0.0408324	-0.696195	0.376814	0.0073083	0.02925	0.155963	0.0319251	0.0720754	0.0171177	0.012169	0.812531	0.38412	0.147309	0.0115396	0.819637	0.0880613	0.0107194	0.0645607	0.0611471	0.505412
853356	YJL089W	SIP4	C6 zinc cluster transcriptional activator; binds to the carbon source-responsive element (CSRE) of gluconeogenic genes; involved in the positive regulation of gluconeogenesis; regulated by Snf1p protein kinase; localized to the nucleus	0.417526	0.949209	0.683492	-0.328403	0.589267	-0.401386	0.20044	blue	0.760588	-0.624161	-0.416329	-0.642564	-0.505022	-0.655065	-0.656299	0.0939991	-0.288422	-0.48364	-0.724069	-0.134781	-0.534396	-0.691279	-0.559521	-0.562218	-0.242511	0.219631	-0.010586	-0.669475	0.404607	0.00407707	0.0300621	0.178231	0.0242341	0.0939963	0.0207746	0.020454	0.771378	0.363274	0.111155	0.00775107	0.676216	0.0734692	0.0127801	0.0585455	0.0570804	0.447586
853357	YJL088W	ARG3	Ornithine carbamoyltransferase; also known as carbamoylphosphate:L-ornithine carbamoyltransferase; catalyzes the biosynthesis of the arginine precursor citrulline	0.289966	0.962184	0.564158	-0.486371	0.417825	-0.591653	0.135867	blue	0.866814	-0.353399	-0.155143	-0.375946	-0.279643	-0.416464	-0.452755	0.320016	0.0206041	-0.160476	-0.466889	0.221717	-0.225221	-0.46657	-0.284466	-0.281725	0.101437	0.508069	0.334696	-0.739993	0.0870844	0.000262802	0.259796	0.630192	0.228443	0.378706	0.178076	0.139411	0.310558	0.949323	0.618329	0.125961	0.488586	0.48156	0.126254	0.370186	0.375016	0.753763
853358	YJL087C	TRL1	tRNA ligase; required for tRNA splicing and for both splicing and translation of HAC1 mRNA in the UPR; has phosphodiesterase, polynucleotide kinase, and ligase activities; localized at the inner nuclear envelope and partially to polysomes	0.348115	0.973913	0.590732	-0.347985	0.64307	-0.373683	0.152228	blue	0.692558	-0.633429	-0.404671	-0.563297	-0.495471	-0.656708	-0.684858	0.0195469	-0.267844	-0.369741	-0.656072	-0.00678708	-0.463926	-0.672802	-0.487587	-0.522847	-0.165119	0.274334	0.120439	-0.627121	0.330636	0.0125477	0.0270138	0.191946	0.0565018	0.101424	0.0203485	0.0139951	0.951921	0.39997	0.236833	0.0205126	0.983298	0.128707	0.0165037	0.107843	0.0811315	0.608067
853376	YJL069C	UTP18	Small-subunit processome protein involved in pre-18S rRNA maturation; part of a subunit of the 90S preribosomal particle capable of interacting directly with the 5' ETS of the 35S pre-rRNA; contains WD40 repeats	0.512137	0.984044	0.553215	-0.406409	0.391492	-0.62974	0.0122657	blue	0.724906	-0.515384	-0.416212	-0.595406	-0.533335	-0.617325	-0.664593	0.16107	-0.221838	-0.385524	-0.65494	0.028779	-0.470654	-0.681661	-0.522306	-0.49635	-0.160005	0.266723	0.0806029	-0.839608	0.267487	0.00764603	0.0863623	0.178366	0.0410924	0.0741513	0.0324639	0.0183912	0.617012	0.488342	0.215843	0.0208073	0.929255	0.122526	0.0146309	0.0815029	0.100725	0.619373
853397	YJL050W	MTR4	ATP-dependent 3'-5' RNA helicase of the DExD/H family; involved in nuclear RNA processing and degradation both as a component of TRAMP complex and in TRAMP-independent processes; TRAMP unwinds RNA duplexes, with Mtr4p unwinding activity stimulated by Pap2p/Air2p but not dependent on ongoing polyadenylation; contains an arch domain, with two coiled-coil arms/stalks and a globular fist/KOW domain, …	0.497388	0.979877	0.557698	-0.392708	0.361031	-0.653019	-0.0228549	blue	0.715975	-0.49165	-0.402049	-0.572669	-0.531752	-0.5884	-0.634116	0.202241	-0.186421	-0.348707	-0.630597	0.0704296	-0.438225	-0.665186	-0.487041	-0.457149	-0.123524	0.302156	0.107238	-0.845269	0.220154	0.00882251	0.104502	0.195116	0.051645	0.0751776	0.0441637	0.0267969	0.528459	0.561834	0.266618	0.0279204	0.827818	0.15417	0.0182497	0.108297	0.135135	0.702116
853413	YJL038C	LOH1	Protein involved in outer spore wall assembly; likely involved directly in dityrosine layer assembly; induced during sporulation; repressed during vegetative growth by Sum1p and Hst1p; sequence similar to adjacent ORF, IRC18/YJL037W, and the irc18 loh1 double mutant exhibits reduced dityrosine fluorescence relative to the single mutants; SWAT-GFP and mCherry fusion proteins localize to the cytoso…	0.589157	0.893501	0.696355	-0.10673	0.483508	-0.435322	0.107447	blue	0.688655	-0.5639	-0.443176	-0.635963	-0.561328	-0.610378	-0.650421	0.160354	-0.295209	-0.572895	-0.669827	-0.269433	-0.565942	-0.690001	-0.628442	-0.568789	-0.277042	0.0600913	-0.150927	-0.70925	0.482959	0.0132668	0.0561799	0.149034	0.0262208	0.0575611	0.0350427	0.0220148	0.618598	0.351575	0.0515314	0.0171704	0.397072	0.0550998	0.0130155	0.0286247	0.0536188	0.383343
853414	YJL037W	IRC18	Protein involved in outer spore wall assembly; possible role in assembly of the dityrosine layer; similar to adjacent ORF, LOH1; irc18 loh1 double mutant exhibits reduced dityrosine fluorescence relative to single mutants; SWAT-GFP fusion protein localizes to the ER and vacuole, while mCherry fusion localizes to the vacuole; expression induced in respiratory-deficient cells and carbon-limited che…	0.36221	0.940669	0.631758	-0.295081	0.52095	-0.472428	-0.00309939	blue	0.748654	-0.497173	-0.33973	-0.544836	-0.454639	-0.538711	-0.5521	0.259728	-0.129425	-0.323393	-0.618119	0.0225614	-0.382911	-0.595	-0.428993	-0.423934	-0.0657017	0.351317	0.119409	-0.731995	0.229687	0.00508708	0.100072	0.279959	0.0669834	0.137567	0.0707382	0.0627109	0.414936	0.688501	0.305191	0.0321779	0.944516	0.219238	0.0412661	0.164047	0.169624	0.839239
853419	YJL033W	HCA4	DEAD box RNA helicase; component of the SSU; interacts with Bfr2p and Enp2p; high-copy number suppression of a U14 snoRNA processing mutant suggests an involvement in 18S rRNA synthesis	0.504546	0.977695	0.570413	-0.410443	0.330057	-0.683803	-0.0196828	blue	0.745698	-0.462374	-0.378646	-0.568879	-0.512875	-0.565007	-0.607118	0.243228	-0.164757	-0.347336	-0.624207	0.0734599	-0.427967	-0.648366	-0.480218	-0.441071	-0.110756	0.315555	0.106669	-0.870557	0.206829	0.00536398	0.130161	0.224847	0.0535721	0.0881707	0.0555925	0.0363017	0.446202	0.608863	0.268632	0.0300464	0.820514	0.165169	0.0225803	0.114081	0.151205	0.731847
853428	YJL025W	RRN7	Component of the core factor (CF) rDNA transcription factor complex; CF is required for transcription of 35S rRNA genes by RNA polymerase I and is composed of Rrn6p, Rrn7p, and Rrn11p	0.501677	0.977625	0.586596	-0.362769	0.335924	-0.677632	-0.0551545	blue	0.728168	-0.448263	-0.369082	-0.551929	-0.509206	-0.546739	-0.591624	0.275808	-0.143311	-0.315942	-0.604575	0.0968395	-0.399043	-0.634514	-0.458238	-0.422209	-0.0718933	0.334899	0.131558	-0.869884	0.179116	0.00724719	0.143872	0.237736	0.0628095	0.090861	0.0658452	0.0427311	0.385552	0.656802	0.317105	0.0373062	0.764639	0.198792	0.0266722	0.134088	0.171554	0.824289
853445	YJL010C	NOP9	Essential subunit of U3-containing 90S preribosome; involved in production of 18S rRNA and assembly of small ribosomal subunit; also part of pre-40S ribosome and required for its export into cytoplasm; binds RNA and contains pumilio domain	0.476046	0.990769	0.566881	-0.414433	0.421032	-0.608491	0.0297543	blue	0.737564	-0.519319	-0.397815	-0.581783	-0.518026	-0.609737	-0.648636	0.166075	-0.205977	-0.365782	-0.647626	0.0484934	-0.451879	-0.671121	-0.500624	-0.482165	-0.139076	0.29535	0.106196	-0.818648	0.251255	0.00618499	0.0835763	0.200306	0.0472105	0.0844853	0.0352874	0.0225055	0.605962	0.520704	0.242282	0.0227866	0.881034	0.140274	0.0168781	0.0973694	0.11241	0.666417
853458	YJR002W	MPP10	Component of the SSU processome and 90S preribosome; required for pre-18S rRNA processing, interacts with and controls the stability of Imp3p and Imp4p, essential for viability; similar to human Mpp10p	0.519781	0.972667	0.543519	-0.398881	0.344177	-0.662635	-0.0405219	blue	0.689561	-0.503577	-0.430637	-0.596858	-0.55812	-0.608936	-0.653317	0.175532	-0.216205	-0.369272	-0.649882	0.0546167	-0.463931	-0.685817	-0.511126	-0.478855	-0.155581	0.270591	0.0762272	-0.859335	0.230571	0.0130972	0.0950957	0.16226	0.0404755	0.0593165	0.0355956	0.0212353	0.585288	0.49973	0.237475	0.0221622	0.866125	0.128702	0.0138083	0.0894462	0.11526	0.629216
853459	YJR003C	MRX12	Protein that associates with mitochondrial ribosome; detected in highly purified mitochondria in high-throughput studies; predicted to be involved in ribosome biogenesis	0.285957	0.951769	0.39971	-0.525891	0.590743	-0.419478	0.0384754	blue	0.712566	-0.603078	-0.405277	-0.557267	-0.488529	-0.650773	-0.679578	-0.0132558	-0.255701	-0.374303	-0.654278	0.0223652	-0.474783	-0.656003	-0.476372	-0.499239	-0.213399	0.281015	0.111098	-0.660387	0.315953	0.00930549	0.0379067	0.191216	0.0597895	0.107062	0.021919	0.0150564	0.967386	0.422464	0.230647	0.0209811	0.944997	0.118831	0.0205304	0.11743	0.0984481	0.505446
853471	YJR014W	TMA22	Protein of unknown function; associates with ribosomes and has a putative RNA binding domain; interacts with Tma20p; similar to human GRAP and human DRP1, which interacts with human Tma20p homolog MCT-1; protein abundance increases in response to DNA replication stress	0.287089	0.937211	0.59823	-0.368095	0.692505	-0.288078	0.21542	blue	0.728849	-0.611414	-0.335855	-0.546001	-0.398405	-0.626277	-0.632416	0.04405	-0.277695	-0.359711	-0.652701	-0.01676	-0.445173	-0.618486	-0.464611	-0.526675	-0.161693	0.302038	0.147453	-0.545718	0.351615	0.0071659	0.034649	0.285832	0.0662848	0.199578	0.0293454	0.0273356	0.891876	0.382175	0.250779	0.0213993	0.95877	0.146993	0.0320465	0.128069	0.0785344	0.615633
853473	YJR016C	ILV3	Dihydroxyacid dehydratase; catalyzes third step in the common pathway leading to biosynthesis of branched-chain amino acids	0.561138	0.91222	0.586376	-0.278956	0.399573	-0.54291	0.0950792	blue	0.71114	-0.39824	-0.283574	-0.509616	-0.379118	-0.523828	-0.579056	0.226403	-0.199384	-0.345452	-0.552682	-0.000395133	-0.386401	-0.56693	-0.500941	-0.4864	-0.0759456	0.217879	0.116867	-0.767992	0.282114	0.00951324	0.199781	0.371755	0.0905576	0.224222	0.0804603	0.048508	0.479202	0.534424	0.271412	0.0623774	0.999028	0.214711	0.0545825	0.0971235	0.108831	0.814532
853498	YJR041C	URB2	Protein required for normal metabolism of the rRNA primary transcript; nucleolar protein; proposed to be involved in ribosome biogenesis	0.476752	0.97759	0.522853	-0.348503	0.543103	-0.47372	0.0439545	blue	0.663251	-0.621873	-0.475639	-0.618104	-0.57046	-0.691833	-0.745716	0.0157033	-0.316698	-0.443543	-0.687398	-0.0574007	-0.533466	-0.724736	-0.570547	-0.572217	-0.240534	0.184226	0.0345606	-0.729517	0.377504	0.018714	0.0308512	0.118075	0.0321835	0.0527621	0.0126792	0.00536228	0.961368	0.315884	0.148658	0.0135048	0.859359	0.0740669	0.0076673	0.0527178	0.0518722	0.451412
853506	YJR047C	ANB1	Translation elongation factor eIF-5A; previously thought to function in translation initiation; undergoes an essential hypusination modification; expressed under anaerobic conditions; ANB1 has a paralog, HYP2, that arose from the whole genome duplication; human EIF5A complements the inviability of the yeast hyp2 anb1 double null mutant	-0.608613	-0.745393	-0.724358	-0.10219	-0.543535	0.213487	0.109323	blue	-0.355664	0.643202	0.555592	0.775728	0.596933	0.690079	0.673671	-0.100074	0.597002	0.562711	0.800794	0.292921	0.655815	0.728348	0.683595	0.73462	0.406641	0.0357614	0.214956	0.563885	-0.503727	0.256538	0.0240481	0.060726	0.00302341	0.0404438	0.0130011	0.0163126	0.756983	0.0404147	0.0568156	0.00174925	0.355495	0.0205794	0.00722554	0.0142438	0.00650431	0.189584
853514	YJR054W	KCH1	Potassium transporter that mediates K+ influx; activates high-affinity Ca2+ influx system (HACS) during mating pheromone response; expression up-regulated in response to alpha factor; localized to sites of polarized growth; member of a fungal-specific gene family; potential Cdc28p substrate; KCH1 has a paralog, PRM6, that arose from the whole genome duplication	0.47927	0.835859	0.88762	6.62e-05	0.496907	-0.358528	0.276956	blue	0.70785	-0.447418	-0.241657	-0.492251	-0.361587	-0.445046	-0.458109	0.311518	-0.173466	-0.38502	-0.538188	-0.14598	-0.376236	-0.522364	-0.450335	-0.432421	-0.0564192	0.215873	0.0246021	-0.595108	0.330589	0.0100058	0.144722	0.449236	0.104013	0.248134	0.147123	0.134211	0.324298	0.589781	0.216496	0.0710655	0.650767	0.228054	0.0814631	0.141803	0.160334	0.861743
853516	YJR055W	HIT1	Protein involved in C/D snoRNP assembly; regulates abundance of Rsa1p; required for growth at high temperature; similar to human ZNHIT3	0.394292	0.97533	0.575121	-0.361117	0.600918	-0.419966	0.0509495	blue	0.746499	-0.627808	-0.436401	-0.628993	-0.5334	-0.662174	-0.683702	0.0983711	-0.290862	-0.464639	-0.713278	-0.08515	-0.534783	-0.699257	-0.547626	-0.552031	-0.246335	0.245578	0.0255045	-0.688414	0.395155	0.00528785	0.0288346	0.156091	0.0284434	0.0741093	0.0189762	0.0142225	0.761011	0.359045	0.128042	0.00920303	0.792464	0.0732214	0.0113815	0.0653191	0.0627505	0.440231
853526	YJR063W	RPA12	RNA polymerase I subunit A12.2; contains two zinc binding domains, and the N terminal domain is responsible for anchoring to the RNA pol I complex; physically interacts with transcriptional activator Msn4p, to regulate transcription of AYR1, a gene involved in lipid metabolism	0.526956	0.967651	0.599095	-0.375828	0.302028	-0.701031	-0.0800086	blue	0.723704	-0.45812	-0.400801	-0.602167	-0.533344	-0.565779	-0.599026	0.288307	-0.17805	-0.349493	-0.652307	0.0720046	-0.438702	-0.658481	-0.488117	-0.44982	-0.116877	0.321548	0.0877172	-0.897077	0.192518	0.0077971	0.134201	0.196637	0.0382753	0.0741455	0.0551858	0.0395665	0.363474	0.57983	0.265469	0.0215047	0.82402	0.153671	0.0198957	0.107403	0.142316	0.717547
853530	YJR067C	YAE1	Protein that forms a complex with Lto1p and Rli1p; essential for growth under standard (aerobic) conditions but not under anaerobic conditions; may have a role in protection of ribosomal assembly and function from damage due to reactive oxygen species	0.107543	0.845072	0.486659	-0.551698	0.470044	-0.427387	0.130765	blue	0.747855	-0.437232	-0.2034	-0.412017	-0.268815	-0.44958	-0.442512	0.182488	-0.0857031	-0.143727	-0.532761	0.21627	-0.268362	-0.459403	-0.240013	-0.299997	-0.00191603	0.519846	0.308019	-0.570288	0.0911647	0.00516082	0.155214	0.526049	0.18323	0.398197	0.142555	0.149717	0.570262	0.791142	0.655861	0.0745223	0.499598	0.399024	0.132974	0.452422	0.343444	0.995285
853534	YJR070C	LIA1	Deoxyhypusine hydroxylase; HEAT-repeat containing metalloenzyme that catalyzes hypusine formation; binds to and is required for the modification of Hyp2p (eIF5A); complements S. pombe mmd1 mutants defective in mitochondrial positioning; protein abundance increases in response to DNA replication stress	0.620811	0.961757	0.619915	-0.306921	0.317631	-0.668639	-0.0159743	blue	0.673614	-0.515159	-0.469901	-0.653744	-0.596828	-0.633071	-0.673399	0.192735	-0.260931	-0.444735	-0.69028	-0.036676	-0.517712	-0.723423	-0.582952	-0.533906	-0.205747	0.191513	-0.0145232	-0.88256	0.291545	0.0163251	0.0865229	0.123208	0.0211222	0.0404882	0.0271271	0.0163723	0.548412	0.4127	0.14744	0.0129638	0.909904	0.0847068	0.0078328	0.0466615	0.0737838	0.521181
853535	YJR072C	NPA3	Member of the conserved GPN-loop GTPase family; has a role in transport of RNA polymerase II to the nucleus; exhibits GTP-dependent binding to PolII; has ATPase activity; involved in sister chromatid cohesion; phosphorylated by the Pcl1p-Pho85p kinase complex; human homolog XAB1 interacts with human RNA polymerase II; protein abundance increases in response to DNA replication stress	0.461593	0.978209	0.544	-0.433627	0.496474	-0.522584	0.0490677	blue	0.706154	-0.60171	-0.465286	-0.654599	-0.556836	-0.690105	-0.708415	0.0653287	-0.297771	-0.437198	-0.728651	-0.0255997	-0.530791	-0.726934	-0.565655	-0.5671	-0.241629	0.233212	0.0359114	-0.768417	0.330913	0.010267	0.0384614	0.127442	0.0208967	0.0600294	0.0129963	0.00991986	0.840141	0.347211	0.155251	0.00718939	0.937056	0.0758053	0.00739619	0.0552507	0.0544942	0.44929
853540	YJR077C	MIR1	Mitochondrial phosphate carrier; imports inorganic phosphate into mitochondria; functionally redundant with Pic2p but more abundant than Pic2p under normal conditions; phosphorylated	0.472522	0.880107	0.609835	-0.0950142	0.683287	-0.225101	-0.103133	blue	0.499613	-0.773879	-0.645029	-0.80232	-0.711103	-0.799127	-0.776007	-0.0107927	-0.493088	-0.609262	-0.863067	-0.276682	-0.688964	-0.832307	-0.695942	-0.721584	-0.441198	0.0395595	-0.204962	-0.586023	0.526937	0.098156	0.00313957	0.023521	0.00168792	0.00951873	0.00181821	0.00300621	0.973444	0.103337	0.0354698	0.00029992	0.383986	0.0132088	0.00078238	0.0119481	0.00806904	0.151073
853544	YJR082C	EAF6	Subunit of the NuA4 acetyltransferase complex; this complex acetylates histone H4 and NuA3 acetyltransferase complex that acetylates histone H3	0.333051	0.966828	0.578113	-0.391064	0.487447	-0.525758	-0.0704803	blue	0.724816	-0.512854	-0.3667	-0.563329	-0.472211	-0.570147	-0.576313	0.251396	-0.154324	-0.26629	-0.650886	0.135987	-0.380783	-0.621759	-0.404092	-0.426519	-0.0649874	0.429518	0.195117	-0.751158	0.163439	0.00765724	0.0881861	0.241011	0.0564843	0.121124	0.0529218	0.0498382	0.430587	0.632021	0.402814	0.0218882	0.673459	0.222026	0.0308907	0.192643	0.16676	0.840967
853558	YJR095W	SFC1	Mitochondrial succinate-fumarate transporter; transports succinate into and fumarate out of the mitochondrion; required for ethanol and acetate utilization	0.313624	0.919045	0.582734	-0.411384	0.349037	-0.615777	-0.126658	blue	0.726257	-0.371874	-0.263621	-0.491078	-0.383243	-0.450912	-0.443411	0.397225	-0.0477086	-0.146441	-0.568363	0.257008	-0.263114	-0.521871	-0.301572	-0.316112	0.0586562	0.522861	0.27888	-0.796446	0.00993391	0.00747887	0.233928	0.407722	0.104968	0.218805	0.141231	0.148793	0.201035	0.882948	0.649726	0.0538387	0.420014	0.408658	0.0818029	0.340791	0.316831	0.856311
853560	YJR097W	JJJ3	Protein of unknown function; contains a CSL Zn finger and a DnaJ-domain; involved in diphthamide biosynthesis; ortholog human Dph4	0.492661	0.968968	0.596451	-0.389558	0.298605	-0.706074	-0.0687304	blue	0.758482	-0.416917	-0.346064	-0.555793	-0.484946	-0.522002	-0.554087	0.335063	-0.119897	-0.305295	-0.609974	0.114738	-0.385924	-0.616024	-0.442536	-0.403492	-0.0597	0.371158	0.139888	-0.887186	0.15349	0.0042432	0.177557	0.270508	0.0606134	0.110051	0.0817127	0.0615763	0.287041	0.710525	0.334565	0.0351968	0.722535	0.215327	0.0329359	0.149692	0.193367	0.853778
853573	YJR109C	CPA2	Large subunit of carbamoyl phosphate synthetase; carbamoyl phosphate synthetase catalyzes a step in the synthesis of citrulline, an arginine precursor	0.195276	0.36692	-0.158226	-0.534251	0.0925339	-0.303255	0.0456454	blue	0.109674	-0.379638	-0.410288	-0.341918	-0.409802	-0.486879	-0.522541	-0.469988	-0.270472	-0.258565	-0.369927	-0.0194989	-0.365932	-0.451372	-0.342005	-0.331722	-0.334336	-0.115263	-0.112974	-0.363703	0.170322	0.734381	0.223535	0.185259	0.276673	0.185832	0.108432	0.0813413	0.123129	0.395182	0.417104	0.23658	0.952039	0.242073	0.140775	0.276543	0.292173	0.288154
853575	YJR111C	PXP2	Peroxisomal matrix protein with naturally active promoter; well-conserved in fungi; localized to peroxisomes under physiological growth conditions; levels of some amino acids are altered upon both knockout and overexpression, suggesting potential involvement of Pxp2p in amino acid metabolism or related cellular metabolic processes (needs further study); GFP-fusion protein displays inherent dual l…	0.635365	0.876101	0.662336	-0.109173	0.577054	-0.324447	0.203128	blue	0.582628	-0.658539	-0.513387	-0.692563	-0.601587	-0.720449	-0.755134	-0.0585461	-0.453039	-0.648223	-0.721623	-0.357229	-0.653761	-0.756969	-0.729206	-0.699005	-0.39162	-0.0974946	-0.228401	-0.644738	0.584512	0.0468132	0.019881	0.0877995	0.0125469	0.0385116	0.00821751	0.00451776	0.856578	0.139132	0.02262	0.00806392	0.254302	0.0211176	0.00436562	0.00712347	0.0114239	0.208048
853582	YJR118C	ILM1	Protein of unknown function; may be involved in mitochondrial DNA maintenance; required for slowed DNA synthesis-induced filamentous growth	-0.278769	-0.882333	-0.364063	0.599885	-0.145728	0.788393	0.200297	blue	-0.776873	0.246732	0.201831	0.381395	0.350967	0.350347	0.383094	-0.413031	-0.0779957	0.106807	0.448754	-0.330151	0.205667	0.446659	0.226151	0.178066	-0.0834382	-0.545144	-0.29808	0.874187	0.0653435	0.00295318	0.43947	0.529313	0.221222	0.263319	0.264223	0.218999	0.182047	0.809606	0.741112	0.14338	0.294603	0.521347	0.145487	0.479704	0.579797	0.796558
853583	YJR119C	JHD2	JmjC domain family histone demethylase; promotes global demethylation of H3K4 and repression of noncoding intergenic transcription during sporulation; removes methyl groups added by Set1p methyltransferase; negatively regulated by H3K14 acetylation; protein levels regulated by Not4p polyubiquitin-mediated degradation; regulates sporulation timing by extending period of active transcription in opp…	0.292854	0.957207	0.511069	-0.435006	0.588592	-0.416603	0.0596826	blue	0.780288	-0.573867	-0.379417	-0.566203	-0.47765	-0.615371	-0.614609	0.122941	-0.165914	-0.383006	-0.66123	-0.00191385	-0.440998	-0.646131	-0.466705	-0.468698	-0.164274	0.327097	0.0959901	-0.659294	0.300404	0.00275104	0.0510461	0.223827	0.0549627	0.116309	0.0331748	0.0334553	0.703464	0.606316	0.219114	0.0192083	0.99529	0.15128	0.0232073	0.12613	0.124303	0.60993
853593	YJR129C	EFM3	S-adenosylmethionine-dependent methyltransferase; seven-beta-strand lysine methyltransferase which trimethylates translation elongation factor EF2 (Eft1p and Eft2p) at lysine 509; green fluorescent protein (GFP)-fusion protein localizes to the cytoplasm; ortholog of human gene FAM86A	0.450622	0.957728	0.529058	-0.324322	0.638575	-0.356906	0.0615806	blue	0.593562	-0.74623	-0.58121	-0.711502	-0.646942	-0.793933	-0.821904	-0.11067	-0.434151	-0.524729	-0.791236	-0.147755	-0.633323	-0.805712	-0.640095	-0.668598	-0.365255	0.113438	-0.0577249	-0.65147	0.466338	0.0418855	0.00531338	0.047481	0.0094601	0.0229783	0.00204649	0.00103768	0.732047	0.158481	0.079847	0.00217332	0.646762	0.0270474	0.00155745	0.0249638	0.0174514	0.243012
853596	YJR132W	NMD5	Karyopherin; a carrier protein involved in nuclear import of proteins; importin beta homolog	0.336955	0.986927	0.544013	-0.440619	0.546256	-0.490916	0.0921829	blue	0.787228	-0.519479	-0.31455	-0.503425	-0.423105	-0.568029	-0.605415	0.153042	-0.159652	-0.309404	-0.59388	0.0774193	-0.389587	-0.600584	-0.424958	-0.435665	-0.0806836	0.364491	0.192747	-0.710474	0.249544	0.00237283	0.0834647	0.319358	0.095212	0.17055	0.0540111	0.0369723	0.63489	0.620157	0.327767	0.0417481	0.81099	0.210629	0.0389223	0.168486	0.156871	0.803156
853599	YJR135C	MCM22	Outer kinetochore protein and component of the Ctf3 subcomplex; binds to centromeric DNA in a Ctf19p-dependent manner; involved in chromosome segregation and minichromosome maintenance; orthologous to human centromere constitutive-associated network (CCAN) subunit CENP-K and fission yeast sim4	0.712753	0.778789	0.523995	0.012773	0.227767	-0.5717	-0.391491	blue	0.310108	-0.519816	-0.615311	-0.699744	-0.729542	-0.624057	-0.695517	0.151842	-0.432473	-0.476288	-0.68425	-0.144677	-0.589356	-0.733003	-0.623573	-0.577803	-0.317674	-0.0151438	-0.190784	-0.839721	0.327523	0.326609	0.0832291	0.0331968	0.0113	0.00708382	0.0300977	0.0120222	0.637578	0.160278	0.117503	0.0141144	0.65371	0.0437352	0.00668476	0.0302636	0.0491123	0.314313
853606	YJR141W	IPA1	Essential protein of unknown function	0.707283	0.810118	0.726489	0.0668708	0.312706	-0.50876	-0.23026	blue	0.431493	-0.529321	-0.581334	-0.764258	-0.673803	-0.641922	-0.645649	0.269959	-0.367684	-0.490922	-0.765381	-0.178304	-0.564796	-0.744159	-0.643027	-0.613432	-0.267078	0.0617565	-0.181275	-0.811343	0.329164	0.161334	0.076772	0.0474223	0.00379948	0.0162836	0.0244225	0.0233442	0.396114	0.239655	0.105096	0.00371743	0.579281	0.055704	0.00551264	0.0240989	0.0338914	0.40137
853613	YJR148W	BAT2	Cytosolic branched-chain amino acid (BCAA) aminotransferase; preferentially involved in BCAA catabolism; homolog of murine ECA39; highly expressed during stationary phase and repressed during logarithmic phase; BAT2 has a paralog, BAT1, that arose from the whole genome duplication	0.370244	0.971217	0.588009	-0.398332	0.541838	-0.469957	0.0927592	blue	0.683029	-0.620599	-0.45448	-0.614893	-0.556356	-0.672994	-0.673362	0.0517029	-0.229475	-0.369036	-0.699579	0.0241475	-0.468609	-0.710963	-0.49594	-0.508791	-0.173361	0.292335	0.0834478	-0.707683	0.260605	0.0143562	0.0312971	0.137722	0.0333506	0.0602975	0.0164612	0.0163804	0.873215	0.473094	0.237798	0.0113275	0.940621	0.124384	0.00953922	0.101051	0.091169	0.59001
853620	YJR155W	AAD10	Putative aryl-alcohol dehydrogenase; similar to P. chrysosporium aryl-alcohol dehydrogenase; mutational analysis has not yet revealed a physiological role; members of the AAD gene family comprise three pairs (AAD3 + AAD15, AAD6/AAD16 + AAD4, AAD10 + AAD14) whose two genes are more related to one another than to other members of the family	0.17954	0.930343	0.550331	-0.538956	0.416531	-0.571649	0.0781812	blue	0.822899	-0.364021	-0.165092	-0.382141	-0.279257	-0.408128	-0.413647	0.316588	0.0395639	-0.0871009	-0.486863	0.298318	-0.191389	-0.451062	-0.216294	-0.240104	0.127078	0.588095	0.374291	-0.71855	-0.00699582	0.00101081	0.244729	0.608126	0.220245	0.379392	0.187812	0.181331	0.316062	0.902839	0.787804	0.108445	0.346283	0.551263	0.141082	0.499549	0.452245	0.693905
853625	YJR160C	MPH3	Alpha-glucoside permease; transports maltose, maltotriose, alpha-methylglucoside, and turanose; identical to Mph2p; encoded in a subtelomeric position in a region likely to have undergone duplication	0.250437	0.533149	0.553893	-0.207224	0.299857	-0.276439	0.343122	blue	0.321652	-0.387735	-0.244026	-0.349661	-0.290123	-0.388235	-0.39803	-0.110471	-0.19932	-0.163902	-0.391963	-0.00222705	-0.259359	-0.390828	-0.266521	-0.30309	-0.0509402	0.117831	0.0502007	-0.430756	0.103872	0.307953	0.212996	0.444665	0.265223	0.360322	0.212355	0.20004	0.732512	0.534556	0.610751	0.207616	0.994519	0.415624	0.209052	0.40239	0.338245	0.875072
853630	YKL205W	LOS1	Nuclear pore protein; involved in nuclear export of pre-tRNA and in re-export of mature tRNAs after their retrograde import from the cytoplasm; deletion mutation extends replicative lifespan, as does exclusion of Los1p from the nucleus in response to caloric restriction	0.37802	0.931675	0.465734	-0.375312	0.664504	-0.313826	0.153722	blue	0.613193	-0.675912	-0.465095	-0.590003	-0.528208	-0.720254	-0.763884	-0.145253	-0.364229	-0.441566	-0.674723	-0.0924364	-0.535187	-0.706568	-0.561004	-0.598644	-0.273922	0.13493	0.0347547	-0.591882	0.423208	0.0339806	0.0158272	0.127618	0.0434471	0.0775097	0.00824322	0.00382711	0.652409	0.244439	0.150692	0.0160833	0.775092	0.072963	0.0102027	0.0577364	0.0397257	0.388941
853638	YKL196C	YKT6	Vesicle membrane protein (v-SNARE) with acyltransferase activity; involved in trafficking to and within the Golgi, endocytic trafficking to the vacuole, and vacuolar fusion; membrane localization due to prenylation at the carboxy-terminus; human homolog YKT6 can complement yeast ykt6 mutant	-0.813385	-0.751703	-0.685285	-0.152079	-0.45657	0.282375	-0.0980164	blue	-0.403977	0.686355	0.663436	0.811583	0.741217	0.769931	0.789425	0.0621089	0.570188	0.813028	0.796991	0.563448	0.78329	0.843945	0.870147	0.799629	0.566053	0.319823	0.486029	0.60796	-0.710836	0.192781	0.0137045	0.0186692	0.00135009	0.0058054	0.00339885	0.00226184	0.847937	0.0529008	0.00130247	0.00190957	0.0564208	0.00258218	0.000557444	0.000232875	0.00179721	0.0550415
853643	YKL191W	DPH2	Protein required for synthesis of diphthamide; required along with Dph1p, Kti11p, Jjj3p, and Dph5p; diphthamide is a modified histidine residue of translation elongation factor 2 (Eft1p or Eft2p); may act in a complex with Dph1p and Kti11p	0.646825	0.895696	0.5037	-0.256081	0.454068	-0.459364	0.0389949	blue	0.539194	-0.682749	-0.61668	-0.746429	-0.705594	-0.78238	-0.82332	-0.101708	-0.481732	-0.64957	-0.778045	-0.275498	-0.706227	-0.832716	-0.747599	-0.707177	-0.46647	-0.0743591	-0.233907	-0.727581	0.539034	0.0704373	0.0144121	0.0326972	0.0052945	0.0103542	0.00263253	0.000999605	0.753122	0.11278	0.0222476	0.00288255	0.386108	0.0102556	0.00077345	0.00518462	0.0101088	0.126347
853652	YKL183W	LOT5	Protein of unknown function; gene expression increases in cultures shifted to a lower temperature; protein abundance increases in response to DNA replication stress	-0.0601397	-0.722159	-0.524411	0.433181	-0.40475	0.380324	-0.0518609	blue	-0.756149	0.278979	0.0737901	0.341532	0.141719	0.283689	0.248989	-0.383818	-0.0349708	0.0887277	0.442961	-0.192295	0.157567	0.30908	0.152084	0.191626	-0.0989422	-0.547506	-0.291291	0.542502	-0.0219537	0.00443308	0.379887	0.819719	0.277251	0.660411	0.371553	0.43516	0.218056	0.914079	0.783922	0.149255	0.549343	0.624791	0.328299	0.637035	0.550759	0.75966
853654	YKL181W	PRS1	5-phospho-ribosyl-1(alpha)-pyrophosphate synthetase; synthesizes PRPP, which is required for nucleotide, histidine, and tryptophan biosynthesis; plays a key role in cell wall integrity (CWI) pathway; one of five related enzymes, which are active as heteromultimeric complexes; missense mutations in human homolog PRPS1 are associated with neuropathic Arts syndrome and Charcot-Marie Tooth (CMTX5) di…	0.653636	0.952774	0.609815	-0.235535	0.365268	-0.608686	-0.0937856	blue	0.60842	-0.572651	-0.548691	-0.721253	-0.667716	-0.694848	-0.72298	0.155181	-0.331562	-0.506577	-0.750706	-0.102508	-0.580078	-0.781895	-0.648792	-0.60453	-0.279987	0.121085	-0.0912678	-0.864452	0.349869	0.0357948	0.0516542	0.0646918	0.00811207	0.0176553	0.0121397	0.00788917	0.630108	0.29242	0.092823	0.00490122	0.751236	0.0480189	0.00265966	0.0224621	0.0373243	0.378096
853660	YKL220C	FRE2	Ferric reductase and cupric reductase; reduces siderophore-bound iron and oxidized copper prior to uptake by transporters; expression induced by low iron levels but not by low copper levels	0.17253	0.747282	0.272881	-0.48716	0.396995	-0.407211	-0.0749238	blue	0.622766	-0.306272	-0.212742	-0.385283	-0.287432	-0.425346	-0.389631	0.173175	0.0380655	-0.132818	-0.454755	0.191797	-0.180843	-0.428675	-0.274671	-0.281006	0.0397467	0.367948	0.214525	-0.610654	0.0200594	0.0305414	0.332941	0.506789	0.216156	0.364998	0.168056	0.210573	0.590414	0.906504	0.68071	0.137454	0.550397	0.573802	0.164394	0.387593	0.376289	0.902392
853663	YKL217W	JEN1	Monocarboxylate/proton symporter of the plasma membrane; transport activity is dependent on the pH gradient across the membrane; mediates high-affinity uptake of carbon sources lactate, pyuvate, and acetate, and also of the micronutrient selenite, whose structure mimics that of monocarboxylates; expression and localization are tightly regulated, with transcription repression, mRNA degradation, an…	0.164082	0.822268	0.499893	-0.263227	0.683393	-0.188438	-0.0892181	blue	0.646462	-0.54695	-0.335348	-0.541174	-0.401622	-0.547796	-0.501388	0.188283	-0.192174	-0.320515	-0.638461	-0.0111743	-0.38448	-0.556278	-0.39517	-0.448953	-0.14199	0.340178	0.0998729	-0.481441	0.276132	0.0231136	0.0657197	0.286605	0.0692115	0.195637	0.0652186	0.0967779	0.557861	0.549599	0.309763	0.0254556	0.972505	0.217196	0.0603411	0.203589	0.143181	0.659795
853664	YKL216W	URA1	Dihydroorotate dehydrogenase; catalyzes the fourth enzymatic step in the de novo biosynthesis of pyrimidines, converting dihydroorotic acid into orotic acid	0.773436	0.728459	0.496241	-0.0488853	0.383498	-0.354632	-0.0440727	blue	0.276988	-0.661608	-0.700846	-0.82492	-0.727779	-0.813732	-0.838941	-0.180146	-0.622773	-0.674509	-0.817516	-0.382563	-0.746428	-0.838193	-0.825878	-0.812293	-0.539899	-0.270232	-0.371767	-0.684733	0.565703	0.383438	0.0191151	0.0111171	0.000957884	0.00729387	0.00127976	0.000646987	0.575303	0.0305389	0.0161299	0.00116279	0.219692	0.00529461	0.000661257	0.000933544	0.00132655	0.0699993
853682	YKL172W	EBP2	Required for 25S rRNA maturation and 60S ribosomal subunit assembly; localizes to the nucleolus and in foci along nuclear periphery; constituent of 66S pre-ribosomal particles; cooperates with Rrs1p and Mps3p to mediate telomere clustering by binding Sir4p, but is not involved in telomere tethering	0.539787	0.966122	0.605251	-0.364958	0.296749	-0.701509	-0.0565032	blue	0.694572	-0.466253	-0.411552	-0.599158	-0.548351	-0.576363	-0.609335	0.254679	-0.183693	-0.344025	-0.645479	0.0770035	-0.436122	-0.669257	-0.49195	-0.453405	-0.114569	0.301689	0.0844681	-0.893309	0.18253	0.0121883	0.126547	0.183775	0.0395116	0.0648918	0.0498137	0.0354418	0.424386	0.567673	0.273529	0.0233925	0.81199	0.156386	0.0173003	0.104258	0.138772	0.72293
853693	YKL163W	PIR3	O-glycosylated covalently-bound cell wall protein; required for cell wall stability; expression is cell cycle regulated, peaking in M/G1 and also subject to regulation by the cell integrity pathway; coding sequence contains length polymorphisms in different strains; PIR3 has a paralog, HSP150, that arose from the whole genome duplication	0.114084	0.843796	0.521247	-0.425879	0.513218	-0.376978	0.123524	blue	0.848594	-0.375338	-0.105002	-0.333253	-0.226559	-0.348627	-0.349087	0.319256	-0.00300379	-0.215419	-0.437502	0.112568	-0.243639	-0.395465	-0.237247	-0.240386	0.0184687	0.481261	0.251171	-0.523466	0.173178	0.00048317	0.229256	0.745357	0.289816	0.478891	0.266736	0.266062	0.311775	0.992608	0.501329	0.15493	0.727606	0.44541	0.203222	0.457806	0.451697	0.95457
853696	YKL161C	KDX1	Protein kinase; implicated in Slt2p mitogen-activated (MAP) kinase signaling pathway; interacts with numerous components in the mating pheromone and CWI MAPK pathways; associates with Rlm1p; KDX1 has a paralog, SLT2, that arose from the whole genome duplication	-0.29596	0.597224	0.169631	-0.455528	0.601814	-0.0637047	-0.126578	blue	0.443763	-0.410627	-0.136336	-0.200537	-0.180469	-0.313484	-0.285828	0.0379494	-0.0290678	0.0651125	-0.338168	0.323661	-0.098758	-0.275288	0.00809793	-0.117798	0.0652427	0.548182	0.392344	-0.204403	-0.0406871	0.148433	0.18486	0.672663	0.532014	0.574607	0.32109	0.367798	0.906788	0.928547	0.840665	0.282318	0.304766	0.760096	0.386485	0.980073	0.715403	0.840349
853713	YKL144C	RPC25	RNA polymerase III subunit C25; required for transcription initiation; forms a heterodimer with Rpc17p; paralog of Rpb7p	0.547755	0.976931	0.613183	-0.33394	0.362052	-0.64882	-0.0406209	blue	0.68352	-0.537052	-0.468647	-0.640643	-0.599048	-0.630299	-0.667735	0.189008	-0.23832	-0.410232	-0.6896	0.000967755	-0.498817	-0.716906	-0.543	-0.505677	-0.181696	0.247107	0.0241557	-0.868583	0.261453	0.0142586	0.0717797	0.124349	0.0248005	0.0395573	0.028017	0.017651	0.556317	0.455713	0.185325	0.01309	0.997618	0.098779	0.00869399	0.068094	0.0935009	0.571964
853714	YKL143W	LTV1	Component of the GSE complex; GSE is required for proper sorting of amino acid permease Gap1p; required for ribosomal small subunit export from nucleus; required for growth at low temperature	0.501795	0.978166	0.573607	-0.385538	0.353362	-0.661225	-0.07144	blue	0.689653	-0.497171	-0.423717	-0.602074	-0.550633	-0.60028	-0.633648	0.218359	-0.200597	-0.337347	-0.658325	0.0876483	-0.442029	-0.678352	-0.489581	-0.46794	-0.123369	0.314254	0.105403	-0.866588	0.193646	0.0130801	0.100074	0.169867	0.0383133	0.0635581	0.0390475	0.0269446	0.495361	0.531889	0.283562	0.0199352	0.786497	0.150215	0.015311	0.106194	0.124996	0.702474
853718	YKL139W	CTK1	Catalytic (alpha) subunit of C-terminal domain kinase I (CTDK-I); phosphorylates both RNA pol II subunit Rpo21p to affect transcription and pre-mRNA 3' end processing, and ribosomal protein Rps2p to increase translational fidelity; required for H3K36 trimethylation but not dimethylation by Set2p; suggested stimulatory role in 80S formation during translation initiation; similar to the Drosophila …	0.29802	0.955757	0.546824	-0.400084	0.709121	-0.298673	0.179044	blue	0.703363	-0.679407	-0.43142	-0.600864	-0.496006	-0.699164	-0.709063	-0.0518234	-0.300997	-0.417696	-0.704719	-0.0654294	-0.505749	-0.690273	-0.518269	-0.564607	-0.230378	0.243727	0.0733908	-0.582149	0.386946	0.0107077	0.0150916	0.161412	0.0388073	0.100998	0.0113971	0.00982202	0.872921	0.341757	0.176665	0.0104917	0.839898	0.0934469	0.0129651	0.0843139	0.0558041	0.471305
853719	YKL138C-A	HSK3	Essential subunit of the Dam1 complex (aka DASH complex); complex couples kinetochores to the force produced by MT depolymerization thereby aiding in chromosome segregation; is transferred to the kinetochore prior to mitosis	-0.543425	-0.946065	-0.542907	0.354544	-0.42636	0.560287	-0.0540168	blue	-0.657788	0.557875	0.469693	0.627545	0.580189	0.662677	0.70355	-0.0494764	0.267547	0.453565	0.673282	0.0745941	0.516448	0.715588	0.584067	0.547999	0.225553	-0.140867	0.0247148	0.809357	-0.330678	0.0200718	0.0594522	0.123397	0.0289218	0.0479656	0.0188534	0.0106777	0.878638	0.400512	0.138616	0.0163979	0.817784	0.0856027	0.00887647	0.0461426	0.0650989	0.480897
853734	YKL125W	RRN3	Protein required for transcription of rDNA by RNA polymerase I; transcription factor independent of DNA template; involved in recruitment of RNA polymerase I to rDNA; structure reveals unique HEAT repeat fold and a surface serine patch; phosphorylation of serine patch impairs cell growth and reduces RNA polymerase I binding in vitro and RNA polymerase I recruitment to the rDNA gene in vivo	0.429157	0.967158	0.522041	-0.436196	0.352533	-0.652666	-0.084959	blue	0.70653	-0.484849	-0.40513	-0.572291	-0.537088	-0.579745	-0.60104	0.220535	-0.145051	-0.308809	-0.63664	0.122743	-0.408852	-0.657841	-0.44738	-0.421782	-0.103976	0.355167	0.128217	-0.839919	0.156413	0.0102086	0.110134	0.191393	0.0518351	0.0717572	0.0481779	0.038735	0.490967	0.652865	0.328746	0.0260118	0.703923	0.186954	0.0200583	0.14476	0.172033	0.747775
853739	YKL120W	OAC1	Mitochondrial inner membrane transporter; transports oxaloacetate, sulfate, thiosulfate, and isopropylmalate; member of the mitochondrial carrier family	0.357224	0.942788	0.513616	-0.47271	0.457878	-0.540185	0.0490432	blue	0.806416	-0.42122	-0.26383	-0.495153	-0.360521	-0.514021	-0.536779	0.238295	-0.103593	-0.280013	-0.574421	0.0981733	-0.342542	-0.546084	-0.407787	-0.406801	-0.0400509	0.378236	0.195925	-0.760547	0.195364	0.00153138	0.172665	0.407337	0.101678	0.249636	0.0873411	0.0719521	0.455762	0.748676	0.378048	0.0507707	0.761479	0.27574	0.0662355	0.188217	0.189393	0.901648
853741	YKL119C	VPH2	Integral membrane protein required for V-ATPase function; not an actual component of the vacuolar H+-ATPase (V-ATPase) complex; functions in the assembly of the V-ATPase; localized to the endoplasmic reticulum (ER); involved in methionine restriction extension of chronological lifespan in an autophagy-dependent manner	-0.564788	-0.978709	-0.686482	0.221722	-0.479258	0.532574	-0.0485961	blue	-0.699798	0.546289	0.423377	0.619976	0.544485	0.623732	0.665498	-0.189189	0.261247	0.435307	0.668452	0.0703983	0.492602	0.692119	0.565691	0.543338	0.16488	-0.203603	-0.0233308	0.795915	-0.338097	0.0112909	0.0661132	0.170246	0.0315166	0.0671947	0.030209	0.0181755	0.555933	0.412114	0.15725	0.0174852	0.827894	0.10373	0.0126272	0.055232	0.0678884	0.608593
853748	YKL112W	ABF1	DNA binding protein with possible chromatin-reorganizing activity; involved in transcriptional activation, gene silencing, and DNA replication and repair	0.530688	0.94656	0.759761	-0.172369	0.539379	-0.436906	0.239622	blue	0.712251	-0.535124	-0.337145	-0.549696	-0.445763	-0.578519	-0.627123	0.15313	-0.265135	-0.413254	-0.605843	-0.0985719	-0.45469	-0.627367	-0.529595	-0.527559	-0.125927	0.191512	0.0590942	-0.689782	0.369166	0.00935103	0.0730037	0.283869	0.0641031	0.146395	0.0487662	0.0290622	0.634692	0.404934	0.181787	0.0368028	0.760536	0.137517	0.028981	0.0765912	0.0779423	0.696562
853762	YKL099C	UTP11	Subunit of U3-containing Small Subunit (SSU) processome complex; involved in production of 18S rRNA and assembly of small ribosomal subunit	0.485906	0.927691	0.543699	-0.428009	0.160058	-0.803825	-0.123176	blue	0.729787	-0.316622	-0.297464	-0.491257	-0.449882	-0.443735	-0.483018	0.388807	-0.0350288	-0.214919	-0.533507	0.209563	-0.303329	-0.553882	-0.367121	-0.310782	0.0208584	0.414245	0.190268	-0.937798	0.0327307	0.00705503	0.316006	0.347733	0.104822	0.142254	0.148461	0.111684	0.211624	0.913937	0.502346	0.0740408	0.513309	0.337845	0.0616924	0.240431	0.325502	0.948699
853767	YKL095W	YJU2	Essential protein required for pre-mRNA splicing; associates transiently with the spliceosomal NTC (\nineteen complex\") and acts after Prp2p to promote the first catalytic reaction of splicing"	0.0319607	0.871751	0.399575	-0.467317	0.738634	-0.198861	0.144978	blue	0.669806	-0.589952	-0.281133	-0.399275	-0.336912	-0.551664	-0.571662	-0.0492926	-0.161864	-0.201196	-0.531969	0.11578	-0.319709	-0.515504	-0.288875	-0.376072	-0.0677367	0.406176	0.273276	-0.426351	0.229464	0.0171751	0.0434699	0.376063	0.198507	0.284223	0.062962	0.052152	0.879086	0.615253	0.530639	0.0750365	0.720105	0.311049	0.0862765	0.362488	0.228274	0.83432
853776	YKL086W	SRX1	Sulfiredoxin; contributes to oxidative stress resistance by reducing cysteine-sulfinic acid groups in the peroxiredoxin Tsa1p, which is formed upon exposure to oxidants; conserved in higher eukaryotes; protein abundance increases in response to DNA replication stress	-0.1037	0.690665	0.235614	-0.516962	0.385252	-0.361192	-0.12743	blue	0.451899	-0.317756	-0.15196	-0.218945	-0.195607	-0.328817	-0.334766	0.128061	0.0402579	0.194459	-0.341432	0.519312	-0.025523	-0.309934	0.0154333	-0.10681	0.211019	0.646193	0.536371	-0.449083	-0.217892	0.140255	0.314181	0.637312	0.494176	0.542352	0.296677	0.287496	0.69164	0.901142	0.544771	0.2774	0.0835816	0.937244	0.326894	0.962032	0.741106	0.510318
853780	YKL082C	RRP14	Essential protein, constituent of 66S pre-ribosomal particles; interacts with proteins involved in ribosomal biogenesis and cell polarity; member of the SURF-6 family	0.497554	0.977003	0.604033	-0.386603	0.347878	-0.668653	-0.0338373	blue	0.697879	-0.491045	-0.410095	-0.59312	-0.537798	-0.588473	-0.622798	0.220169	-0.188632	-0.324478	-0.649923	0.0918139	-0.429688	-0.666829	-0.476324	-0.455094	-0.103968	0.323939	0.114176	-0.872425	0.179796	0.0116146	0.104995	0.185486	0.0420773	0.0713105	0.0441309	0.0305306	0.491703	0.557118	0.303477	0.0221509	0.776572	0.16329	0.0178621	0.117472	0.137124	0.747793
853783	YKL079W	SMY1	Kinesin-like myosin passenger-protein; interacts with Myo2p and enhances its interaction with Sec4p during transport of secretory vesicles; controls actin cable structure and dynamics	-0.225466	0.742867	0.268013	-0.611955	0.553316	-0.262143	0.196508	blue	0.75721	-0.245946	0.0936032	-0.0435292	0.0206483	-0.202164	-0.224228	0.17645	0.203516	0.160568	-0.189633	0.438678	0.0631729	-0.16522	0.0761864	-0.0109408	0.303528	0.688405	0.603272	-0.342678	-0.111243	0.00434597	0.440976	0.772318	0.893147	0.949215	0.528621	0.483547	0.583296	0.525808	0.618124	0.55499	0.153696	0.84536	0.607844	0.813953	0.97308	0.337513
853784	YKL078W	DHR2	Predominantly nucleolar DEAH-box ATP-dependent RNA helicase; required for 18S rRNA synthesis	0.513093	0.958223	0.522844	-0.411097	0.266131	-0.724736	-0.0753638	blue	0.711955	-0.42653	-0.380236	-0.548046	-0.515328	-0.544833	-0.596233	0.257035	-0.136807	-0.311024	-0.597288	0.11432	-0.40032	-0.634537	-0.456705	-0.411322	-0.0864236	0.325008	0.125017	-0.890367	0.161999	0.00939409	0.166748	0.222746	0.065071	0.0864023	0.0669849	0.0407401	0.419963	0.671588	0.325106	0.040294	0.723511	0.197225	0.0266648	0.135563	0.184044	0.789421
853788	YKL074C	MUD2	Protein involved in early pre-mRNA splicing; component of the pre-mRNA-U1 snRNP complex, the commitment complex; interacts with Msl5p/BBP splicing factor and Sub2p; similar to metazoan splicing factor U2AF65	0.214808	0.939272	0.499675	-0.416015	0.723253	-0.272141	0.0911387	blue	0.694713	-0.653321	-0.396368	-0.563996	-0.456494	-0.659336	-0.663861	-0.00352114	-0.270822	-0.349701	-0.678709	0.00626906	-0.45711	-0.645378	-0.451435	-0.517586	-0.18643	0.321248	0.142155	-0.548246	0.332026	0.0121633	0.0212342	0.202098	0.056129	0.135767	0.0196799	0.0185668	0.991335	0.394546	0.265165	0.0152365	0.984573	0.135172	0.0234213	0.140712	0.0847953	0.561814
853804	YKL061W	BLI1	Subunit of the BLOC-1 complex involved in endosomal maturation; interacts with Msb3p; green fluorescent protein (GFP)-fusion protein localizes to the endosome	0.456361	0.687557	0.694654	0.148672	0.596313	-0.1152	-0.221147	blue	0.31162	-0.703852	-0.630227	-0.802386	-0.678281	-0.693923	-0.637275	0.0889284	-0.527047	-0.573786	-0.836507	-0.33789	-0.656279	-0.744287	-0.640539	-0.67906	-0.43467	-0.0127337	-0.297127	-0.494234	0.478313	0.324132	0.0106295	0.0280405	0.00168529	0.0153259	0.0123033	0.0258168	0.783444	0.0782846	0.0510863	0.000694368	0.282738	0.0204592	0.00550012	0.0248316	0.0151636	0.157928
853807	YKL058W	TOA2	TFIIA small subunit; involved in transcriptional activation, acts as antirepressor or as coactivator; required, along with Toa1p, for ribosomal protein gene transcription in vivo; homologous to smallest subunit of human and Drosophila TFIIA; protein abundance increases in response to DNA replication stress	-0.833645	-0.670553	-0.590007	-0.2175	-0.453104	0.208021	0.0837259	blue	-0.180717	0.804487	0.849631	0.928017	0.90387	0.877372	0.892463	0.232488	0.754194	0.899437	0.898623	0.659829	0.920449	0.944136	0.955788	0.900202	0.748047	0.473373	0.650053	0.578041	-0.779317	0.574071	0.00160363	0.000467708	1.35e-05	5.49e-05	0.000177139	9.43e-05	0.46714	0.00459721	6.83e-05	7.1e-05	0.0195565	2.19e-05	3.9e-06	1.23e-06	6.58e-05	0.00514297
853818	YKL048C	ELM1	Serine/threonine protein kinase; regulates the orientation checkpoint, the morphogenesis checkpoint and the metabolic switch from fermentative to oxidative metabolism by phosphorylating the activation loop of Kin4p, Hsl1p and Snf4p respectively; cooperates with Hsl7p in recruiting Hsl1p to the septin ring, a prerequisite for subsequent recruitment, phosphorylation, and degradation of Swe1p; forms…	0.679492	0.77723	0.679055	0.192586	0.377871	-0.404174	-0.192873	blue	0.351133	-0.520885	-0.507732	-0.615267	-0.615864	-0.570446	-0.646211	0.192409	-0.409256	-0.449802	-0.612819	-0.184543	-0.526839	-0.665297	-0.582592	-0.566468	-0.233343	0.00616691	-0.120894	-0.67796	0.386018	0.263077	0.0824847	0.0919578	0.033213	0.0329944	0.0527693	0.0231847	0.5491	0.186477	0.142333	0.0341204	0.565851	0.078424	0.0182234	0.0468299	0.0548239	0.465457
853822	YKL044W	MMO1	Protein of unknown function; SWAT-GFP, seamless-GFP and mCherry fusion proteins localize to the mitochondria; mRNA identified as translated by ribosome profiling data; MMO1 is a non-essential gene	0.150011	0.788712	0.16588	-0.588538	0.651434	-0.201731	0.107238	blue	0.566234	-0.636133	-0.431469	-0.526518	-0.444061	-0.685801	-0.695949	-0.282712	-0.308878	-0.391032	-0.632327	-0.0606493	-0.486281	-0.621269	-0.475077	-0.528006	-0.317796	0.140558	0.0326466	-0.455402	0.377601	0.0549466	0.026168	0.16136	0.0786398	0.148128	0.0138116	0.0119469	0.373273	0.328632	0.208793	0.0273639	0.851475	0.108931	0.0310621	0.118571	0.0776444	0.314117
853823	YKL043W	PHD1	Transcriptional activator that enhances pseudohyphal growth; physically interacts with the Tup1-Cyc8 complex and recruits Tup1p to its targets; regulates expression of FLO11, an adhesin required for pseudohyphal filament formation; similar to StuA, an A. nidulans developmental regulator; potential Cdc28p substrate; PHD1 has a paralog, SOK2, that arose from the whole genome duplication	0.286792	0.861423	0.290531	-0.540184	0.579103	-0.339602	0.0600094	blue	0.569246	-0.643001	-0.489787	-0.601359	-0.530517	-0.723139	-0.732532	-0.200795	-0.322062	-0.404354	-0.689965	-0.0353072	-0.514212	-0.693815	-0.526849	-0.562312	-0.301217	0.151367	0.0190216	-0.600055	0.338186	0.0533833	0.0241066	0.106025	0.0386046	0.0759848	0.00786887	0.00673805	0.531475	0.3073	0.192327	0.0130221	0.913255	0.0872039	0.0123224	0.0784171	0.0570296	0.341387
853826	YKL040C	NFU1	Protein involved in Fe-S cluster transfer to mitochondrial clients; protects [4Fe-4S] clusters from damage due to oxidative stress; acts along with Bol3 at a late step in the transfer of [4Fe-4S] clusters from the ISA complex to client proteins; Fe-S loaded homodimer at steady state; similar to NifU, a bacterial protein required for Fe/S cluster maturation; ortholog of the human NFU1, mutations o…	-0.295843	0.564386	0.0708091	-0.550468	0.527656	-0.111378	-0.121787	blue	0.341481	-0.400814	-0.185736	-0.208425	-0.18138	-0.359371	-0.340545	-0.0874797	-0.0309495	0.158995	-0.349123	0.420341	-0.0630649	-0.284915	0.030302	-0.12697	0.0967525	0.554286	0.452147	-0.242491	-0.137674	0.277327	0.196622	0.563297	0.515651	0.572644	0.25126	0.278732	0.7869	0.923932	0.621615	0.26601	0.173658	0.845621	0.369398	0.92552	0.694154	0.764845
853839	YKL029C	MAE1	Mitochondrial malic enzyme; catalyzes the oxidative decarboxylation of malate to pyruvate, which is a key intermediate in sugar metabolism and a precursor for synthesis of several amino acids	0.689105	0.865792	0.614328	-0.247097	0.211735	-0.669934	0.133195	blue	0.701567	-0.388087	-0.343061	-0.545865	-0.480735	-0.508996	-0.579568	0.218379	-0.221334	-0.487023	-0.554622	-0.143151	-0.48281	-0.611112	-0.576569	-0.478539	-0.195605	0.074062	-0.0810097	-0.840843	0.354534	0.0109986	0.212545	0.274964	0.0663662	0.113636	0.091017	0.0482623	0.495322	0.489356	0.108312	0.0612728	0.657165	0.11186	0.0347633	0.0497128	0.115535	0.542356
853841	YKL027W	TCD2	tRNA threonylcarbamoyladenosine dehydratase; required for the ct6A tRNA base modification, where an adenosine at position 37 is modified to form a cyclized active ester with an oxazolone ring; localized to the mitochondrial outer membrane; TCD2 has a paralog, TCD1, that arose from the whole genome duplication	0.26349	0.946928	0.486515	-0.445798	0.681333	-0.320739	0.155068	blue	0.766895	-0.589949	-0.324925	-0.514403	-0.399577	-0.610311	-0.637336	0.0295942	-0.242805	-0.373414	-0.619554	-0.0184272	-0.443806	-0.603258	-0.45909	-0.497283	-0.172358	0.29311	0.14158	-0.575799	0.364055	0.00360904	0.0434714	0.302772	0.087066	0.198136	0.0350682	0.0257981	0.927256	0.447019	0.231844	0.031666	0.954672	0.148389	0.0378341	0.133273	0.099986	0.592195
853844	YKL024C	URA6	Uridylate kinase; catalyzes the seventh enzymatic step in the de novo biosynthesis of pyrimidines, converting uridine monophosphate (UMP) into uridine-5'-diphosphate (UDP)	0.400428	0.992591	0.584656	-0.418854	0.528313	-0.509665	0.0858671	blue	0.787295	-0.55855	-0.381831	-0.585182	-0.491183	-0.618937	-0.639633	0.150912	-0.202462	-0.393094	-0.667291	0.00186214	-0.461224	-0.66396	-0.499092	-0.49293	-0.156414	0.308726	0.0970336	-0.746399	0.300858	0.00236937	0.059079	0.22065	0.0456275	0.104882	0.0318856	0.0251023	0.639665	0.528	0.20619	0.0177541	0.995417	0.131245	0.0185428	0.0985632	0.103464	0.627359
853847	YKL021C	MAK11	Protein involved in an early step of 60S ribosomal subunit biogenesis; essential for cell growth and replication of killer M1 dsRNA virus; contains four beta-transducin repeats	0.411864	0.99341	0.556987	-0.438837	0.449722	-0.588135	-0.00248238	blue	0.75116	-0.523216	-0.391003	-0.577944	-0.508299	-0.603292	-0.627848	0.187074	-0.174179	-0.333419	-0.654399	0.0840266	-0.427599	-0.660352	-0.466412	-0.458655	-0.114812	0.351335	0.138337	-0.803957	0.216443	0.00486076	0.0808784	0.20883	0.0490444	0.0915348	0.0378206	0.0288211	0.560439	0.58823	0.28956	0.0209493	0.79515	0.165573	0.0194259	0.1264	0.133689	0.722363
853855	YKL014C	URB1	Protein required for the normal accumulation of 25S and 5.8S rRNAs; nucleolar protein; associated with the 27SA2 pre-ribosomal particle; proposed to be involved in the biogenesis of the 60S ribosomal subunit	0.483037	0.982662	0.54182	-0.354622	0.527313	-0.494255	0.0400619	blue	0.702834	-0.601519	-0.451902	-0.61661	-0.554399	-0.669446	-0.720758	0.0680701	-0.305442	-0.455405	-0.685032	-0.0643309	-0.534068	-0.711841	-0.569131	-0.561694	-0.238744	0.199178	0.0306654	-0.744214	0.383167	0.0107928	0.0385391	0.140251	0.0327226	0.0613995	0.0172571	0.00817683	0.833514	0.334321	0.136822	0.013961	0.842556	0.0736793	0.00941065	0.0534425	0.0573631	0.454889
853860	YKL009W	MRT4	Protein involved in mRNA turnover and ribosome assembly; required at post-transcriptional step for efficient retrotransposition; localizes to the nucleolus	0.569211	0.918495	0.563835	-0.38099	0.152992	-0.79512	-0.133909	blue	0.686094	-0.365955	-0.371106	-0.568084	-0.517363	-0.502577	-0.539519	0.344668	-0.132254	-0.309326	-0.598154	0.115617	-0.394671	-0.617092	-0.456545	-0.392793	-0.0809641	0.315312	0.0851754	-0.950153	0.116346	0.0137549	0.242042	0.234972	0.0539827	0.0849532	0.0958621	0.0702349	0.272575	0.682003	0.327895	0.0399302	0.720485	0.204213	0.032548	0.135717	0.206568	0.802484
853866	YKL004W	AUR1	Phosphatidylinositol:ceramide phosphoinositol transferase; required for sphingolipid synthesis; can mutate to confer aureobasidin A resistance; also known as IPC synthase	0.622978	0.9175	0.634413	-0.11216	0.36803	-0.561376	-0.0518627	blue	0.596992	-0.4891	-0.437062	-0.586659	-0.565133	-0.584452	-0.643416	0.224368	-0.245366	-0.408769	-0.613657	-0.0537138	-0.465038	-0.675155	-0.55101	-0.511475	-0.15082	0.16329	0.00766466	-0.785451	0.305794	0.0404188	0.106591	0.155394	0.0449516	0.0555262	0.045964	0.0239859	0.483266	0.442089	0.187052	0.0338078	0.868321	0.127671	0.0159901	0.0633399	0.089191	0.639871
853880	YKR010C	TOF2	Protein required for rDNA silencing and mitotic rDNA condensation; stimulates Cdc14p phosphatase activity and biphasic release to promote rDNA repeat segregation; required for condensin recruitment to the replication fork barrier site; TOF2 has a paralog, NET1, that arose from the whole genome duplication	0.691283	0.632339	0.722047	0.370117	0.310456	-0.317621	-0.0745379	blue	0.267567	-0.385227	-0.385295	-0.490874	-0.489931	-0.433953	-0.508951	0.223022	-0.3178	-0.384902	-0.459872	-0.226844	-0.403448	-0.527899	-0.512257	-0.480217	-0.126172	-0.0724237	-0.135726	-0.577262	0.340523	0.400475	0.216228	0.216139	0.105135	0.105907	0.158693	0.0910503	0.485964	0.31411	0.216648	0.132527	0.478322	0.193421	0.0777154	0.0886202	0.114082	0.695997
[truncated: 4,651 more rows]
[truncated: 10 more columns]

## Sheet: Module Eigengenes
Module Eigengene expression levels											Difference between Control and Drug values
[truncated: 13 more rows]

## Sheet: GO terms Brown module
DAVID Functional Annotation Chart results for GO and KEGG pathway analysis of 1126 genes in Brown module - 249 genes not included in analysis
[truncated: 173 more rows]

[truncated: 6 more sheets: GO terms Green module, GO terms Turquoise module, GO terms Blue module, GO terms Red module, GO terms Yellow module, GO terms Gray module]
